# Supplementary material for: Diurnal regulation of SDG2 and JMJ14 by circadian clock oscillators orchestrates histone modification rhythms in Arabidopsis
Source: Genome Biol. 2019 Aug 20;20:170. doi: 10.1186/s13059-019-1777-1 (PMC6892391; doi:10.1186/s13059-019-1777-1)
Supplement: Supplementary file 2 — Table S1. List of peaks with different H3K4me3 enrichment between WT and cca1 lhy mutant. (XLSX 101 kb) [file 13059_2019_1777_MOESM2_ESM.xlsx]

## Sheet: Increased_H3K4me4_in_mutant
Table S1 List of peaks with different H3K4me3 enrichment between WT and cca1 lhy mutant.
Peak_ID	Gene	Chromosome	Start	Stop	WT	WT	cca1 lhy	cca1 lhy
Peak_303	AT1G05720	Chr1	1718296	1719038	2.5348	2.49358	4.07723	3.89811
Peak_356	AT1G06590	Chr1	2023878	2024770	3.03757	3.05339	3.14704	3.17738
Peak_464	AT1G08125	Chr1	2541780	2542401	5.56914	5.23586	6.68827	6.73372
Peak_690	AT1G11530	Chr1	3874403	3875023	3.89197	4.26371	5.73553	5.37707
Peak_748	AT1G12420	Chr1	4227420	4229107	1.47089	1.59719	1.95235	1.8463
Peak_822	AT1G13650	Chr1	4681016	4682314	1.04454	1.13794	1.71098	1.71371
Peak_1186	AT1G19240	Chr1	6649810	6650535	6.29151	6.38885	7.22923	7.35578
Peak_1259	AT1G20430	Chr1	7083142	7083967	5.56975	5.56975	7.36359	6.94865
Peak_1558	AT1G26665	Chr1	9214059	9214646	5.4645	5.47652	6.35388	6.59827
Peak_1731	AT1G29910	Chr1	10471510	10473381	1.69062	1.50627	4.14129	4.28538
Peak_2039	AT1G43170	Chr1	16266598	16267499	2.94589	2.96156	3.78421	3.78422
Peak_2056	AT1G44000	Chr1	16708652	16709769	5.7048	4.77875	7.91402	8.09734
Peak_2144	AT1G48090	Chr1	17757696	17758567	7.65861	7.94226	9.85084	9.14172
Peak_2659	AT1G58420	Chr1	21707473	21707928	1.52653	1.57044	3.83312	3.00399
Peak_2991	AT1G65590	Chr1	24385836	24386497	5.05471	4.89459	5.54577	5.54756
Peak_3159	AT1G68680	Chr1	25785485	25786146	7.23958	7.19332	9.41554	8.87467
Peak_3243	AT1G70060	Chr1	26383171	26383983	4.61281	4.55052	6.45128	6.47736
Peak_3393	AT1G72450	Chr1	27274437	27276314	4.4868	4.60847	5.02115	5.18987
Peak_3525	AT1G74453	Chr1	27984309	27985246	3.79217	3.79719	6.01222	6.24704
Peak_3793	AT1G78410	Chr1	29502650	29503091	1.67881	2.01457	3.35762	3.02186
Peak_4067	AT2G02770	Chr2	777191	777911	5.56081	5.79114	7.20422	7.46724
Peak_4156	AT2G04795	Chr2	1682873	1683833	3.45506	3.32882	5.77518	5.25061
Peak_4237	AT2G12400	Chr2	5007630	5008329	1.83237	1.90136	3.81618	3.18015
Peak_4342	AT2G16405	Chr2	7108106	7109109	6.70567	6.84527	8.58152	8.59326
Peak_4728	AT2G23430	Chr2	9976947	9978021	3.44146	3.31327	5.38406	4.86582
Peak_4729	AT2G23450	Chr2	9990397	9991790	1.78618	2.12922	3.47435	3.81402
Peak_4751	AT2G23930	Chr2	10182185	10182773	6.49307	6.36909	8.86874	10.0086
Peak_4831	AT2G25420	Chr2	10816768	10817378	2.99952	2.6294	4.65928	5.44772
Peak_5058	AT2G29170	Chr2	12541734	12542409	0.782318	0.439074	1.97757	1.97583
Peak_5067	AT2G29340	Chr2	12597053	12598145	3.34922	3.25116	3.95053	4.11757
Peak_5123	AT2G30330	Chr2	12928984	12929834	8.22406	7.82269	9.67871	9.76868
Peak_5275	AT2G32720	Chr2	13877866	13878564	5.85209	5.7948	6.50251	6.62721
Peak_5595	AT2G37970	Chr2	15890926	15891873	6.41844	6.60978	7.01357	7.01855
Peak_5628	AT2G38465	Chr2	16106347	16106939	3.7639	3.39049	5.11255	5.72431
Peak_5830	AT2G41342	Chr2	17230627	17231011	4.2249	4.28914	4.48494	4.58284
Peak_5913	AT2G42610	Chr2	17747973	17748762	3.11156	3.12349	3.82721	4.01656
Peak_6059	AT2G44980	Chr2	18552459	18552953	2.55078	2.86011	3.94514	4.06412
Peak_6114	AT2G45830	Chr2	18866100	18866582	4.39431	3.65786	5.77699	5.60142
Peak_6398	AT3G02910	Chr3	649744	650720	3.05248	3.09588	3.22367	3.26587
Peak_6523	AT3G04850	Chr3	1335478	1335954	4.73849	5.36815	7.80283	8.32632
Peak_6711	AT3G07270	Chr3	2315001	2316174	4.93004	4.79861	5.29924	5.30928
Peak_6801	AT3G08880	Chr3	2702924	2703657	3.84159	3.43722	5.45911	5.25693
Peak_7609	AT3G20720	Chr3	7239823	7240662	6.70243	5.63957	8.76503	8.42992
Peak_7617	AT3G20870	Chr3	7312032	7312888	6.03759	5.93452	6.60795	6.73303
Peak_7746	AT3G23390	Chr3	8375262	8375998	4.78325	4.8216	6.04898	5.75333
Peak_7808	AT3G24495	Chr3	8917619	8918265	6.74113	6.97051	8.2066	8.05915
Peak_7964	AT3G27090	Chr3	9989446	9990459	3.30002	3.6694	5.24681	6.20744
Peak_8420	AT3G49250	Chr3	18260286	18260996	4.28227	4.25245	5.62908	5.28286
Peak_8493	AT3G50590	Chr3	18770882	18771733	4.48461	4.48185	5.92234	5.84908
Peak_8964	AT3G57730	Chr3	21390769	21391612	6.58832	6.35806	7.81221	7.59591
Peak_9169	AT3G61350	Chr3	22702572	22703204	2.3445	1.8756	3.57257	3.74562
Peak_9319	AT4G00090	Chr4	33999	34876	5.74696	6.08904	7.3259	6.93017
Peak_9332	AT4G00300	Chr4	128479	129513	5.16198	5.59214	6.50254	6.88606
Peak_9423	AT4G01680	Chr4	716997	717542	2.03424	1.64379	3.92611	3.64568
Peak_9772	AT4G10950	Chr4	6713049	6713580	4.46336	5.26039	6.89209	7.13342
Peak_9795	AT4G11330	Chr4	6891962	6892811	3.16213	3.67207	5.10071	4.86515
Peak_9821	AT4G11860	Chr4	7137760	7138617	3.27267	3.30424	5.02432	4.88293
Peak_10192	AT4G17620	Chr4	9821813	9822864	7.00094	6.9763	7.91342	7.79251
Peak_10197	AT4G17695	Chr4	9850041	9850759	3.54496	3.32217	4.53277	4.30016
Peak_10334	AT4G20170	Chr4	10896552	10898230	6.87338	7.21221	8.26798	8.39706
Peak_10369	AT4G21110	Chr4	11267076	11267930	5.88916	5.52135	7.98446	8.81791
Peak_10472	AT4G22780	Chr4	11969781	11971225	2.46326	2.5358	3.50741	3.98589
Peak_10517	AT4G23630	Chr4	12317870	12319031	7.78768	7.88397	9.23412	8.83983
Peak_10637	AT4G25440	Chr4	13008735	13009698	6.22516	6.43409	7.58016	7.28326
Peak_10639	AT4G25470	Chr4	13015320	13016222	2.95175	2.79393	3.6235	3.45133
Peak_10776	AT4G27560	Chr4	13760783	13761449	2.71237	2.44749	3.68006	3.54233
Peak_10857	AT4G28690	Chr4	14158806	14159648	6.367	6.11411	7.62028	7.5169
Peak_11254	AT4G34588	Chr4	16521863	16522999	5.44061	5.5152	6.32424	6.02591
Peak_11352	AT4G36130	Chr4	17097439	17098450	1.72136	1.61312	2.73043	2.37429
Peak_11738	AT5G02940	Chr5	688139	689775	2.42474	2.23982	2.83845	2.78449
Peak_11824	AT5G04235	Chr5	1168306	1169975	7.0148	7.16221	9.35283	9.1998
Peak_12247	AT5G11460	Chr5	3658234	3659044	5.34309	5.20221	6.33357	6.3481
Peak_12249	AT5G11480	Chr5	3670584	3672547	7.60673	7.66011	8.17586	8.23644
Peak_12353	AT5G13300	Chr5	4261575	4262453	5.81278	6.0178	6.88744	6.66635
Peak_12416	AT5G14210	Chr5	4580595	4581861	5.31187	4.95861	6.41533	7.06514
Peak_12516	AT5G15700	Chr5	5121120	5121849	6.44742	6.07471	8.01571	8.21418
Peak_12574	AT5G16540	Chr5	5403094	5404344	6.87587	6.96154	10.0309	8.93873
Peak_12589	AT5G16750	Chr5	5508732	5509475	6.85486	6.76462	7.31396	7.16832
Peak_12707	AT5G18748	Chr5	6254511	6255157	5.53599	5.27567	8.15198	8.37409
Peak_12784	AT5G19850	Chr5	6710774	6711798	6.8705	6.94978	7.55996	7.37381
Peak_12809	AT5G20140	Chr5	6800078	6801033	7.46617	7.32203	8.50725	8.18939
Peak_12854	AT5G20885	Chr5	7083775	7084847	4.28762	4.25029	4.84086	4.65096
Peak_12879	AT5G21274	Chr5	7215343	7216102	4.10072	3.68073	8.78725	7.74581
Peak_12989	AT5G23630	Chr5	7967258	7968153	5.22532	4.7902	6.88296	6.48334
Peak_12998	AT5G23760	Chr5	8013589	8014397	3.42139	3.6689	5.1219	4.63854
Peak_13038	AT5G24420	Chr5	8337074	8337883	1.32034	1.20691	3.26012	3.31829
Peak_13051	AT5G24650	Chr5	8436956	8437805	7.50764	7.44113	9.05961	9.24392
Peak_13134	AT5G26710	Chr5	9305471	9306358	7.7912	7.51001	8.52337	8.85365
Peak_13277	AT5G35690	Chr5	13867375	13868306	7.15419	7.00633	8.16774	8.64671
Peak_13308	AT5G36940	Chr5	14590145	14590898	0.763873	0.935705	1.96826	2.10417
Peak_13458	AT5G40500	Chr5	16227737	16228707	6.49809	6.28096	7.0306	7.03061
Peak_13467	AT5G40660	Chr5	16284448	16285355	6.22902	6.10319	8.394	7.61052
Peak_14153	AT5G52110	Chr5	21173344	21174116	4.32126	4.47058	7.41745	7.1569
Peak_14172	AT5G52510	Chr5	21306975	21309085	6.97158	6.90575	7.20313	7.30748
Peak_14259	AT5G53940	Chr5	21898008	21898730	6.3111	5.68552	8.26763	7.80009
Peak_14288	AT5G54520	Chr5	22148385	22149269	1.69954	1.70486	2.58591	2.41556
Peak_14354	AT5G55530	Chr5	22493305	22494194	5.37833	5.12423	7.60297	8.37188
Peak_14400	AT5G56240	Chr5	22762498	22764567	5.23481	5.08346	5.97053	6.36941
Peak_14446	AT5G57015	Chr5	23070992	23071969	6.49855	5.76632	8.45077	8.15812
Peak_14479	AT5G57490	Chr5	23285152	23285990	6.18397	6.51668	8.17463	7.60327
Peak_14557	AT5G58650	Chr5	23699622	23700180	2.7244	3.58617	7.7876	6.35272
Peak_14763	AT5G62180	Chr5	24978849	24979795	5.76852	5.78966	6.20383	6.38294
Peak_14828	AT5G63145	Chr5	25330104	25330979	7.8307	7.61154	9.21022	9.41595
Peak_14910	AT5G64390	Chr5	25743206	25744316	7.4953	7.55254	8.69963	9.28273
Peak_15072	AT5G66600	Chr5	26578028	26578732	3.88267	3.91775	6.10802	6.40708
Peak_15096	AT5G66910	Chr5	26720261	26721412	6.33903	6.22043	8.16201	8.23666
Peak_15109	AT5G67170	Chr5	26799669	26800494	4.04113	4.00834	5.64532	5.35872

## Sheet: Reduced_H3K4me4_in_mutant
Peak_ID	Gene	Chromosome	Start	Stop	WT	WT	cca1 lhy	cca1 lhy
Peak_6	AT1G01060	Chr1	35955	37913	7.32853	7.4584	4.97167	5.15144
Peak_8	AT1G01090	Chr1	48422	49423	6.62031	6.71552	6.03022	6.01612
Peak_43	AT1G01620	Chr1	225867	227395	5.53481	4.85307	3.4426	3.39715
Peak_55	AT1G01800	Chr1	293279	294313	7.53244	7.35491	4.6715	5.20864
Peak_84	AT1G02220	Chr1	429940	430722	3.68994	3.57862	1.84873	1.32676
Peak_91	AT1G02305	Chr1	455629	456467	3.39873	3.14182	1.97382	2.23915
Peak_92	AT1G02330	Chr1	462844	463705	7.60672	7.85814	5.85773	5.85364
Peak_93	AT1G02340	Chr1	466649	467648	2.81973	3.02821	1.32506	1.48407
Peak_113	AT1G02816	Chr1	621414	622505	9.83684	10.0159	9.09908	9.09585
Peak_124	AT1G02970	Chr1	673346	673894	5.81407	4.8894	3.23743	2.70322
Peak_126	AT1G03000	Chr1	691658	692676	9.10942	8.67365	7.16755	7.24038
Peak_132	AT1G03090	Chr1	739564	740483	11.005	10.5275	9.60061	9.32409
Peak_136	AT1G03160	Chr1	761120	762327	11.556	11.753	8.3199	8.33161
Peak_139	AT1G03210	Chr1	782869	783467	4.42228	5.09083	2.72533	2.97899
Peak_140	AT1G03220	Chr1	786994	788340	8.19586	8.0236	5.26833	5.74751
Peak_143	AT1G03260	Chr1	797710	798544	9.12362	10.262	5.74951	6.11627
Peak_147	AT1G03300	Chr1	812467	813226	6.21461	6.29365	4.72528	4.29444
Peak_166	AT1G03600	Chr1	898756	899831	8.58526	8.35648	6.19457	5.6374
Peak_170	AT1G03680	Chr1	916988	918880	7.24805	7.14539	6.58043	6.72541
Peak_177	AT1G03830	Chr1	966160	966792	7.52287	7.32191	4.44339	4.79507
Peak_195	AT1G04120	Chr1	1069683	1071018	7.27153	7.77581	5.77631	6.00113
Peak_203	AT1G04210	Chr1	1114311	1115460	11.848	11.4158	6.81094	7.22678
Peak_204	AT1G04230	Chr1	1125413	1126163	10.3103	9.57636	6.80822	5.73076
Peak_262	AT1G05020	Chr1	1436462	1437412	5.34174	5.36031	3.95707	4.28033
Peak_271	AT1G05140	Chr1	1482482	1483648	9.20162	8.4921	7.28197	6.93277
Peak_292	AT1G05520	Chr1	1634587	1635973	9.46682	10.2795	6.12439	6.228
Peak_297	AT1G05600	Chr1	1671847	1672630	8.359	7.21572	5.39189	5.09894
Peak_301	AT1G05690	Chr1	1706970	1707710	5.00698	5.40754	3.8053	3.80531
Peak_335	AT1G06200	Chr1	1896331	1897808	6.33623	6.3163	5.72659	5.82382
Peak_340	AT1G06290	Chr1	1922228	1923234	9.56301	10.1525	8.35711	8.2846
Peak_343	AT1G06400	Chr1	1951925	1952861	11.4716	10.0323	6.48625	4.79178
Peak_373	AT1G06800	Chr1	2090120	2091485	7.86026	7.51536	6.08403	5.4934
Peak_381	AT1G06980	Chr1	2143050	2143841	4.97456	4.92697	2.62335	3.43981
Peak_399	AT1G07210	Chr1	2215111	2215958	9.69489	8.85458	5.70026	6.16279
Peak_401	AT1G07230	Chr1	2221600	2222996	9.73039	9.84084	6.84694	6.64713
Peak_443	AT1G07820	Chr1	2421078	2422939	7.56545	7.90451	5.5305	4.75372
Peak_446	AT1G07890	Chr1	2437368	2439377	7.39925	7.00839	4.15581	4.98558
Peak_448	AT1G07910	Chr1	2445923	2446772	8.44991	8.26977	5.19216	4.59494
Peak_452	AT1G07950	Chr1	2466383	2467751	7.51266	8.14588	5.89174	6.25482
Peak_460	AT1G08050	Chr1	2500693	2501444	4.4482	5.29868	1.95	1.92494
Peak_465	AT1G08130	Chr1	2546994	2547880	9.43594	9.11857	7.9819	7.87701
Peak_479	AT1G08370	Chr1	2638090	2639100	7.71008	7.63319	6.04294	5.7249
Peak_482	AT1G08420	Chr1	2649573	2650714	10.6376	10.7665	7.69407	6.26356
Peak_485	AT1G08465	Chr1	2675945	2676361	4.99096	5.25646	3.40922	3.29059
Peak_494	AT1G08580	Chr1	2715725	2716541	7.9291	8.09922	6.70514	6.79165
Peak_495	AT1G08590	Chr1	2721043	2722059	9.2582	9.44814	6.89675	5.76409
Peak_504	AT1G08720	Chr1	2773892	2774951	10.7716	10.7716	6.72031	6.38808
Peak_511	AT1G08830	Chr1	2826977	2828098	5.53854	5.59733	4.10142	3.74975
Peak_519	AT1G08960	Chr1	2879507	2880604	10.5544	12.1784	7.52397	6.55317
Peak_537	AT1G09210	Chr1	2975709	2976863	7.44227	6.81001	4.94588	5.30484
Peak_540	AT1G09270	Chr1	2994271	2995242	8.99369	9.4069	7.14455	6.91068
Peak_548	AT1G09415	Chr1	3037818	3038377	3.20118	3.18435	1.45336	0.877065
Peak_572	AT1G09795	Chr1	3173420	3174367	7.97646	8.11188	6.1861	5.94881
Peak_585	AT1G09950	Chr1	3240734	3241499	5.04346	5.01271	2.81234	3.48737
Peak_610	AT1G10290	Chr1	3370371	3371394	5.3336	4.78264	3.47829	3.0435
Peak_624	AT1G10522	Chr1	3469809	3470711	7.82874	7.71917	4.89785	3.73698
Peak_668	AT1G11210	Chr1	3755981	3757054	5.96922	6.38047	3.45015	3.28455
Peak_670	AT1G11260	Chr1	3777247	3778518	5.20302	5.35117	4.72707	4.55762
Peak_675	AT1G11300	Chr1	3797751	3798332	1.49152	1.8821	0.453324	0.453324
Peak_680	AT1G11350	Chr1	3819477	3820827	2.08714	2.08627	1.0985	1.10199
Peak_727	AT1G12140	Chr1	4121235	4122261	8.2368	8.16684	6.32497	6.05776
Peak_732	AT1G12244	Chr1	4157660	4158514	3.98672	3.86549	1.69856	2.25235
Peak_744	AT1G12380	Chr1	4215697	4217224	9.13437	8.84839	7.18724	6.6284
Peak_758	AT1G12580	Chr1	4282832	4283596	8.49579	8.03697	6.59278	6.38032
Peak_770	AT1G12790	Chr1	4360706	4361358	7.27262	6.39961	4.6951	4.77266
Peak_792	AT1G13110	Chr1	4467222	4468887	3.27686	3.47411	2.40515	1.87068
Peak_797	AT1G13170	Chr1	4491723	4492655	5.4814	5.89421	4.21394	4.37048
Peak_810	AT1G13360	Chr1	4576874	4577909	6.01649	6.29276	4.74771	5.01375
Peak_812	AT1G13390	Chr1	4592765	4593805	5.73189	5.99439	2.73243	3.67606
Peak_815	AT1G13450	Chr1	4614316	4615291	7.41576	7.42179	5.35938	5.16992
Peak_855	AT1G14230	Chr1	4861173	4862136	6.81408	7.18429	5.21716	5.27582
Peak_877	AT1G14520	Chr1	4969275	4970175	2.92432	3.50735	1.30986	1.07718
Peak_892	AT1G14687	Chr1	5047937	5048587	8.85998	7.79613	5.78603	5.19441
Peak_901	AT1G14810	Chr1	5103822	5104810	10.1277	9.10825	7.22896	6.58586
Peak_906	AT1G14900	Chr1	5138581	5139433	7.59308	8.50718	5.15457	5.04549
Peak_921	AT1G15130	Chr1	5208907	5210057	9.75728	9.62732	8.0156	7.86519
Peak_962	AT1G15740	Chr1	5410799	5411783	4.5499	4.60969	2.46807	1.95867
Peak_965	AT1G15780	Chr1	5435837	5436666	7.71125	7.80775	6.03533	5.43506
Peak_986	AT1G16130	Chr1	5525504	5526497	2.32012	2.01203	0.919515	1.14703
Peak_991	AT1G16240	Chr1	5556084	5557762	5.83795	5.94177	5.04525	5.22905
Peak_1030	AT1G16880	Chr1	5773493	5775374	8.10651	8.92887	6.18268	6.14952
Peak_1041	AT1G17090	Chr1	5842270	5842844	5.65974	4.97557	2.71209	3.4065
Peak_1051	AT1G17210	Chr1	5883944	5886364	5.26059	5.38125	3.66242	3.29073
Peak_1062	AT1G17370	Chr1	5953985	5955033	8.29086	9.32722	6.2945	6.07219
Peak_1068	AT1G17450	Chr1	5996079	5997840	9.00219	9.45541	6.64787	6.18931
Peak_1085	AT1G17670	Chr1	6075976	6076734	9.39007	10.8984	6.7287	5.95745
Peak_1087	AT1G17720	Chr1	6097463	6098437	8.21946	8.04308	5.32743	3.66034
Peak_1104	AT1G17980	Chr1	6190910	6191733	7.88176	9.1525	5.83484	5.48036
Peak_1135	AT1G18485	Chr1	6362782	6364022	4.82617	5.04541	3.55343	3.79925
Peak_1150	AT1G18650	Chr1	6419647	6420631	8.2245	7.70912	5.85927	6.25268
Peak_1171	AT1G19010	Chr1	6565497	6566400	7.76666	7.40314	5.00188	5.58559
Peak_1180	AT1G19170	Chr1	6616520	6617558	9.33537	10.1221	6.86634	7.18603
Peak_1189	AT1G19300	Chr1	6671326	6672612	9.25976	9.88025	6.30282	4.86325
Peak_1190	AT1G19310	Chr1	6677040	6677765	3.27067	3.06626	2.16909	2.47248
Peak_1233	AT1G20010	Chr1	6939760	6940706	3.83573	3.78722	2.84446	2.64546
Peak_1245	AT1G20190	Chr1	6998576	6999834	1.88229	2.00391	0.943014	0.605289
Peak_1266	AT1G20510	Chr1	7103813	7106051	5.16636	4.76288	3.47353	3.64555
Peak_1269	AT1G20560	Chr1	7120933	7121961	7.22037	6.99946	5.17834	5.40499
Peak_1273	AT1G20640	Chr1	7154422	7155691	7.05679	7.00949	5.72593	5.33178
Peak_1295	AT1G20970	Chr1	7313896	7314938	5.89368	6.29909	4.36351	4.75312
Peak_1300	AT1G21060	Chr1	7371572	7372970	4.83509	4.30637	2.80861	3.02078
Peak_1308	AT1G21190	Chr1	7420257	7421010	4.72383	4.98938	3.72876	3.54287
Peak_1312	AT1G21270	Chr1	7444797	7446598	5.1571	5.6885	2.14128	2.11905
Peak_1315	AT1G21350	Chr1	7478265	7479188	8.99435	8.31876	6.08929	6.48956
Peak_1339	AT1G21700	Chr1	7623287	7625173	8.58438	9.15551	6.92281	7.35038
Peak_1368	AT1G22280	Chr1	7873956	7874855	7.474	8.05637	5.97946	6.38778
Peak_1384	AT1G22510	Chr1	7951966	7952793	8.24483	7.64311	5.49371	6.00724
Peak_1386	AT1G22530	Chr1	7956475	7958592	6.46473	6.30624	4.4494	4.06403
Peak_1399	AT1G22740	Chr1	8049060	8049920	3.84813	4.38301	2.09301	2.24076
Peak_1410	AT1G22882	Chr1	8098518	8099514	3.80403	3.35983	2.61439	2.5376
Peak_1429	AT1G23190	Chr1	8219718	8220545	7.43542	7.07837	6.34721	6.19358
Peak_1448	AT1G23780	Chr1	8407633	8408625	9.22813	8.78452	5.64956	5.38032
Peak_1452	AT1G23860	Chr1	8428647	8429443	9.11379	9.60443	6.71231	5.82858
Peak_1500	AT1G25250	Chr1	8849336	8850201	2.50255	3.01394	1.39953	1.37913
Peak_1506	AT1G25350	Chr1	8893531	8894886	8.74688	9.63112	6.04812	6.23835
Peak_1508	AT1G25375	Chr1	8902533	8904246	8.59323	8.10601	7.29583	7.16802
Peak_1515	AT1G25450	Chr1	8939261	8940182	2.01841	1.99158	1.22254	1.30047
Peak_1523	AT1G25550	Chr1	8976476	8978031	7.38038	7.1987	5.83542	5.59168
Peak_1536	AT1G26190	Chr1	9060307	9061167	7.92882	7.62513	6.00544	6.10257
Peak_1538	AT1G26218	Chr1	9070941	9072297	9.57802	9.10845	6.88819	6.94896
Peak_1548	AT1G26470	Chr1	9154999	9155792	6.90382	6.39649	5.21866	5.16229
Peak_1553	AT1G26580	Chr1	9184598	9185607	7.69556	7.33521	5.58362	5.82969
Peak_1572	AT1G26920	Chr1	9329458	9330578	6.14028	6.08984	4.63358	4.34044
Peak_1590	AT1G27210	Chr1	9455862	9456409	2.95318	3.09933	0.844686	0.186992
Peak_1612	AT1G27500	Chr1	9553614	9554209	6.14014	7.14999	4.39513	4.04139
Peak_1619	AT1G27640	Chr1	9614450	9615405	10.8949	10.2986	9.23169	8.84484
Peak_1623	AT1G27700	Chr1	9641078	9641973	9.82622	10.3087	8.71017	8.71019
Peak_1685	AT1G29070	Chr1	10149665	10150712	8.4977	9.00008	6.72533	6.79727
Peak_1746	AT1G30100	Chr1	10571335	10572717	4.19523	3.91248	3.41171	3.35465
Peak_1768	AT1G30475	Chr1	10789800	10791179	8.29091	8.43174	6.20581	6.8596
Peak_1786	AT1G30740	Chr1	10903189	10903761	8.61894	7.49866	5.18822	4.42972
Peak_1821	AT1G31440	Chr1	11257957	11258853	8.22513	8.10695	6.7361	6.19774
Peak_1854	AT1G31970	Chr1	11479709	11480971	9.63528	9.95142	7.28521	6.72195
Peak_1872	AT1G32330	Chr1	11659575	11660544	9.19559	9.42023	7.55755	7.20421
Peak_1880	AT1G32415	Chr1	11695649	11696105	7.01287	7.29637	3.35308	3.80412
Peak_1914	AT1G33140	Chr1	12023771	12024189	2.84198	2.83354	1.31838	1.86935
Peak_1927	AT1G33390	Chr1	12104106	12104705	9.05753	9.25383	5.52403	4.30302
Peak_1976	AT1G34550	Chr1	12650250	12651206	9.89896	10.23	8.53282	7.75376
Peak_2032	AT1G42540	Chr1	15973070	15974009	2.99971	3.29918	2.05244	2.05244
Peak_2035	AT1G42970	Chr1	16126984	16129538	6.5576	6.91487	4.88789	5.17878
Peak_2057	AT1G44100	Chr1	16766443	16767531	4.65292	4.91034	3.62327	2.99812
Peak_2100	AT1G46264	Chr1	17225132	17225855	2.38657	2.27758	1.71794	1.73747
Peak_2104	AT1G47128	Chr1	17283901	17285831	8.2308	8.15577	6.90352	7.30123
Peak_2119	AT1G47420	Chr1	17396500	17397362	10.6524	10.9417	7.25261	5.56571
Peak_2138	AT1G47870	Chr1	17634707	17635599	10.1112	9.95816	7.78451	7.24638
Peak_2148	AT1G48120	Chr1	17779396	17780150	6.96403	7.68165	5.18246	5.34159
Peak_2198	AT1G49032	Chr1	18138129	18138869	8.41172	8.92991	6.49	5.68412
Peak_2202	AT1G49140	Chr1	18177578	18178387	8.4135	8.69269	6.94194	6.5188
Peak_2203	AT1G49170	Chr1	18183798	18184564	9.18771	8.82222	6.40974	6.97333
Peak_2213	AT1G49380	Chr1	18276540	18277598	9.96875	9.62174	8.63855	8.09914
Peak_2251	AT1G49990	Chr1	18513601	18514477	5.41507	5.33315	3.85045	3.84643
Peak_2259	AT1G50140	Chr1	18578587	18579221	7.6049	7.872	6.20263	5.8428
Peak_2268	AT1G50320	Chr1	18638670	18639660	6.2897	6.08646	4.80522	4.9847
Peak_2290	AT1G50710	Chr1	18787114	18787901	7.47355	7.61107	6.08497	5.22103
Peak_2330	AT1G51610	Chr1	19136295	19137395	7.99877	8.94232	5.79609	5.97475
Peak_2397	AT1G53035	Chr1	19761754	19762549	5.52664	5.20554	3.72882	3.60601
Peak_2402	AT1G53090	Chr1	19783444	19784771	8.90913	8.57831	7.40314	7.13884
Peak_2403	AT1G53110	Chr1	19790106	19791142	7.48497	7.26122	5.00096	5.72448
Peak_2404	AT1G53120	Chr1	19792674	19793454	7.63103	7.41537	6.38834	6.47582
Peak_2420	AT1G53345	Chr1	19902476	19903555	5.50964	5.39513	4.72878	4.80513
Peak_2428	AT1G53450	Chr1	19952969	19954302	8.44349	7.5323	5.90594	5.89623
Peak_2434	AT1G53541	Chr1	19981306	19982001	6.65915	6.83515	5.15978	5.50163
Peak_2436	AT1G53570	Chr1	19987141	19988332	10.0916	10.2764	8.09068	8.39799
Peak_2440	AT1G53645	Chr1	20027648	20028746	9.82456	9.86743	7.94153	6.86552
Peak_2445	AT1G53730	Chr1	20061598	20062607	2.64487	2.20406	1.02856	0.734688
Peak_2454	AT1G53910	Chr1	20135028	20136004	7.20563	7.80841	4.61127	5.46843
Peak_2456	AT1G54030	Chr1	20167568	20168499	3.77488	3.80647	2.26467	1.6429
Peak_2465	AT1G54120	Chr1	20206992	20207605	4.03225	3.77712	2.81797	3.07503
Peak_2476	AT1G54270	Chr1	20259721	20260736	10.9112	10.5518	8.28888	8.67841
Peak_2481	AT1G54350	Chr1	20286287	20287983	6.40902	6.56935	3.71534	4.45522
Peak_2499	AT1G54710	Chr1	20420103	20421083	10.741	12.0905	8.13317	6.94093
Peak_2525	AT1G55280	Chr1	20623895	20624720	8.8808	8.7325	6.75186	7.42206
Peak_2550	AT1G55620	Chr1	20790221	20791262	12.8883	12.1061	8.79983	8.11824
Peak_2566	AT1G55870	Chr1	20895042	20896442	9.24022	9.47898	7.42009	6.76098
Peak_2621	AT1G56720	Chr1	21265247	21266069	2.55316	2.68769	1.45977	0.83579
Peak_2629	AT1G57720	Chr1	21377519	21378347	9.10724	9.12003	6.61376	5.70873
Peak_2671	AT1G59600	Chr1	21891155	21892087	8.2827	9.61581	4.92594	4.69745
Peak_2694	AT1G60000	Chr1	22093480	22094693	10.7751	11.6134	7.8354	8.44082
Peak_2705	AT1G60260	Chr1	22220476	22221501	5.29106	5.76977	2.86767	2.45899
Peak_2706	AT1G60270	Chr1	22223564	22224301	1.99338	1.79707	1.11878	1.28796
Peak_2736	AT1G60890	Chr1	22416560	22417316	5.22478	6.13655	3.57706	3.52883
Peak_2743	AT1G61010	Chr1	22477115	22478762	9.75357	9.43409	6.52739	6.8919
Peak_2746	AT1G61100	Chr1	22511131	22512385	5.91262	5.57945	3.40961	2.95632
Peak_2757	AT1G61260	Chr1	22593795	22595079	3.31076	2.9597	1.76171	1.81671
Peak_2765	AT1G61430	Chr1	22667909	22668581	3.61925	3.65601	2.32066	1.90414
Peak_2813	AT1G62490	Chr1	23130949	23131499	6.22904	6.02811	3.88407	2.74899
Peak_2815	AT1G62540	Chr1	23151860	23152290	5.54483	5.18957	2.57429	3.0416
Peak_2827	AT1G62790	Chr1	23252290	23252947	1.42306	1.58059	0.825199	0.986301
Peak_2846	AT1G63090	Chr1	23391250	23392924	5.87439	5.58398	3.74867	4.34146
Peak_2934	AT1G64600	Chr1	23995875	23996481	9.9912	9.56625	8.09929	7.50554
Peak_2947	AT1G64780	Chr1	24061205	24062732	6.21599	6.31312	4.56487	3.885
Peak_2958	AT1G64970	Chr1	24135002	24136099	5.74649	6.21526	3.90894	4.5279
Peak_2977	AT1G65320	Chr1	24261895	24263020	9.7145	9.91848	7.17787	7.11721
Peak_3015	AT1G66180	Chr1	24647169	24648310	3.51803	3.47883	3.14364	2.98893
Peak_3034	AT1G66620	Chr1	24853806	24854116	8.50236	7.49874	3.07524	2.78363
Peak_3041	AT1G66740	Chr1	24892254	24893121	6.10899	5.7996	3.7099	4.08714
Peak_3058	AT1G67050	Chr1	25028665	25029861	8.8057	8.50361	4.45746	5.81045
Peak_3070	AT1G67250	Chr1	25164369	25165139	8.04317	7.96526	4.70369	3.60072
Peak_3072	AT1G67300	Chr1	25196295	25197167	7.89134	7.72404	6.06725	5.36164
Peak_3085	AT1G67440	Chr1	25264984	25265858	11.0057	10.7674	8.27713	6.99027
Peak_3131	AT1G68140	Chr1	25540910	25541797	5.04823	5.76979	3.00162	2.17263
Peak_3138	AT1G68260	Chr1	25587056	25587738	6.91696	7.1308	5.64946	4.89586
Peak_3154	AT1G68585	Chr1	25756844	25758298	6.3101	6.31496	3.99249	2.59042
Peak_3221	AT1G69690	Chr1	26216311	26217599	7.77424	8.63226	5.5931	5.58306
Peak_3227	AT1G69770	Chr1	26253088	26253585	2.08604	1.78803	0	0.596012
Peak_3248	AT1G70150	Chr1	26416739	26417352	3.99005	3.69271	2.68753	2.90238
Peak_3253	AT1G70209	Chr1	26439793	26440553	4.52405	4.48536	3.21002	3.1218
Peak_3264	AT1G70370	Chr1	26513203	26515206	8.32123	8.27715	6.51569	6.59093
Peak_3279	AT1G70580	Chr1	26612583	26613420	5.22856	5.60946	3.47868	2.67051
Peak_3291	AT1G70730	Chr1	26672004	26672921	5.42213	5.41187	2.67514	2.80986
Peak_3300	AT1G70895	Chr1	26728099	26728744	4.02578	4.27739	1.8652	1.38022
Peak_3309	AT1G71070	Chr1	26808297	26809607	10.5053	10.4882	8.14151	7.67434
Peak_3317	AT1G71180	Chr1	26832198	26833029	5.97976	6.17371	3.74443	4.29088
Peak_3348	AT1G71860	Chr1	27026629	27027595	8.74178	9.90378	6.78928	6.28503
Peak_3350	AT1G71870	Chr1	27034362	27035047	6.58796	7.11163	4.40914	3.7155
Peak_3356	AT1G71950	Chr1	27080778	27081702	7.03643	6.93584	4.99274	4.97364
Peak_3380	AT1G72300	Chr1	27219430	27221172	8.01102	8.63608	6.52774	6.39193
Peak_3381	AT1G72310	Chr1	27225720	27227130	7.78905	7.92178	7.15297	6.91257
Peak_3382	AT1G72320	Chr1	27232457	27233030	6.54169	5.94251	4.58	4.68466
Peak_3394	AT1G72470	Chr1	27283627	27285192	8.9082	8.56674	7.5461	7.10762
Peak_3403	AT1G72620	Chr1	27341090	27341809	4.70315	4.14531	1.67023	2.06121
Peak_3413	AT1G72790	Chr1	27394736	27396572	9.79133	9.01167	7.50299	7.5575
Peak_3426	AT1G72950	Chr1	27444339	27445277	6.66936	5.93683	3.95119	3.79817
Peak_3431	AT1G73030	Chr1	27473741	27474621	8.08306	9.17666	5.6913	5.98676
Peak_3434	AT1G73090	Chr1	27488147	27488678	9.67726	10.1998	5.65669	5.49287
Peak_3463	AT1G73590	Chr1	27659760	27660975	5.39711	4.91571	2.72858	2.654
Peak_3479	AT1G73820	Chr1	27756554	27757351	7.06699	6.97991	3.72095	3.6442
Peak_3482	AT1G73870	Chr1	27779018	27780781	4.34543	4.48364	3.19697	2.86045
Peak_3498	AT1G74060	Chr1	27850530	27851557	9.78242	9.65295	7.68914	7.7957
Peak_3506	AT1G74205	Chr1	27909729	27910743	4.04176	4.27849	3.03451	3.31302
Peak_3567	AT1G75090	Chr1	28189132	28189746	3.61968	3.77481	2.0703	1.9305
Peak_3568	AT1G75100	Chr1	28192221	28194690	5.45665	5.25685	4.3122	4.63933
Peak_3615	AT1G75800	Chr1	28458702	28460155	9.78071	8.51296	5.27594	5.38288
Peak_3616	AT1G75810	Chr1	28461539	28462521	10.0745	10.2566	9.14827	8.64384
Peak_3628	AT1G76040	Chr1	28537841	28538496	7.20345	6.63608	4.23732	2.90688
Peak_3640	AT1G76160	Chr1	28579503	28581208	2.93837	2.92663	2.1658	1.91243
Peak_3653	AT1G76360	Chr1	28645307	28646714	5.37553	4.92966	3.42726	3.40886
Peak_3660	AT1G76460	Chr1	28687794	28689164	8.29637	8.12971	5.76717	5.378
Peak_3667	AT1G76590	Chr1	28740669	28741956	3.77126	3.92672	2.54679	2.07401
Peak_3694	AT1G76950	Chr1	28906406	28907497	8.56193	8.36671	6.56005	6.9311
Peak_3713	AT1G77220	Chr1	29012621	29013437	6.27552	6.029	5.13229	4.79495
Peak_3716	AT1G77260	Chr1	29025776	29027053	8.85402	8.58214	6.22002	6.40343
Peak_3739	AT1G77600	Chr1	29161548	29162429	8.96061	8.57601	6.55553	6.2711
Peak_3749	AT1G77740	Chr1	29220232	29222457	8.43901	8.80041	5.94472	6.76011
Peak_3756	AT1G77850	Chr1	29272166	29273699	10.5444	11.2147	8.1596	8.66406
Peak_3771	AT1G78110	Chr1	29391894	29392789	6.40446	6.17836	5.36071	5.61311
Peak_3777	AT1G78180	Chr1	29416739	29417953	7.82798	8.91953	5.19603	5.72146
Peak_3779	AT1G78200	Chr1	29420220	29421188	7.89597	7.79265	5.67888	4.92648
Peak_3796	AT1G78460	Chr1	29518465	29519313	2.60816	2.61371	0.864299	0.867074
Peak_3797	AT1G78476	Chr1	29525671	29526303	4.89368	5.15232	2.13982	2.11005
Peak_3863	AT1G79490	Chr1	29900384	29901087	7.90018	7.72618	3.97351	4.69628
Peak_3877	AT1G79650	Chr1	29974675	29975380	7.44236	7.97456	5.724	4.95825
Peak_3895	AT1G79910	Chr1	30056665	30057016	3.49	4.1726	1.68644	2.11475
Peak_3908	AT1G80060	Chr1	30117011	30118743	8.83068	7.96345	6.3588	5.78858
Peak_3918	AT1G80230	Chr1	30170402	30171241	6.60007	7.10205	4.40425	3.35683
Peak_3922	AT1G80280	Chr1	30184932	30186637	3.22419	3.742	2.17478	2.0726
Peak_3927	AT1G80350	Chr1	30207500	30208336	4.61001	4.78732	3.19155	3.19155
Peak_3932	AT1G80420	Chr1	30236941	30237767	4.61306	4.12312	2.41691	2.08222
Peak_3942	AT1G80550	Chr1	30286023	30286859	3.48706	3.23376	2.75672	2.54845
Peak_3948	AT1G80640	Chr1	30311738	30312772	5.95061	6.28632	4.2015	4.16395
Peak_3969	AT1G80920	Chr1	30403600	30404779	4.7792	5.79034	3.14421	2.91364
Peak_3994	AT2G01320	Chr2	157408	158289	9.45871	8.83908	5.6154	5.72091
Peak_4002	AT2G01450	Chr2	200627	202356	3.94608	3.80583	3.2101	2.91667
Peak_4017	AT2G01660	Chr2	291937	292497	2.96033	2.80706	0.772624	1.3227
Peak_4027	AT2G01830	Chr2	367245	368057	4.1608	3.99275	2.48605	2.45418
Peak_4079	AT2G02960	Chr2	863731	864499	5.97187	6.39613	3.8046	3.74027
Peak_4111	AT2G03680	Chr2	1120685	1121495	7.18754	7.26887	4.98582	3.77749
Peak_4226	AT2G10950	Chr2	4317051	4317951	8.64354	8.20169	5.60026	6.37024
Peak_4323	AT2G15790	Chr2	6880195	6880852	6.75016	7.01508	5.18031	4.61109
Peak_4325	AT2G15860	Chr2	6908565	6909575	9.78032	9.39237	8.4056	7.92679
Peak_4350	AT2G16595	Chr2	7198329	7198708	11.6698	11.8434	9.32347	8.53929
Peak_4354	AT2G16660	Chr2	7219693	7221721	3.23396	2.99886	1.97486	1.75543
Peak_4363	AT2G16880	Chr2	7313691	7314667	10.3666	10.2087	8.58479	8.97782
Peak_4397	AT2G17480	Chr2	7593163	7594063	2.85503	2.4707	1.78309	1.60792
Peak_4416	AT2G17730	Chr2	7703857	7705033	6.39052	5.8001	4.70933	4.35508
Peak_4424	AT2G17840	Chr2	7756074	7757920	4.93707	4.7311	4.02835	3.60684
Peak_4426	AT2G17880	Chr2	7767032	7767771	7.53494	7.58747	5.81594	5.01216
Peak_4431	AT2G17990	Chr2	7826769	7827729	7.34276	7.34521	4.94175	5.74822
Peak_4446	AT2G18300	Chr2	7952683	7954729	5.79997	6.21886	3.62498	3.55249
Peak_4448	AT2G18350	Chr2	7971134	7972041	7.03975	7.2486	4.36758	4.76971
Peak_4458	AT2G18650	Chr2	8087289	8088240	4.43914	4.50966	3.09181	2.49424
Peak_4505	AT2G19520	Chr2	8455856	8456669	6.13659	5.98755	4.42049	4.74027
Peak_4509	AT2G19570	Chr2	8470495	8471627	8.64506	9.43097	6.28732	5.76338
Peak_4511	AT2G19620	Chr2	8487999	8488891	5.50534	5.58712	4.10593	4.08747
Peak_4513	AT2G19650	Chr2	8494099	8495954	6.61071	6.31816	5.30215	4.99627
Peak_4526	AT2G19870	Chr2	8575755	8576630	9.424	8.94937	6.24278	5.08243
Peak_4534	AT2G20050	Chr2	8653132	8654714	7.50077	7.92712	5.39065	5.09899
Peak_4539	AT2G20130	Chr2	8691730	8693573	8.86632	9.53955	7.48792	7.2088
Peak_4576	AT2G20690	Chr2	8923162	8924322	4.45973	3.9819	2.02291	2.54031
Peak_4591	AT2G20900	Chr2	8992019	8992988	7.57213	7.50656	4.69069	4.25113
Peak_4613	AT2G21250	Chr2	9104381	9105804	4.1282	4.08602	3.71298	3.71961
Peak_4615	AT2G21280	Chr2	9111934	9113527	9.03103	9.27487	7.18005	7.32636
Peak_4621	AT2G21380	Chr2	9141431	9142593	6.85431	7.14599	6.13425	6.05323
Peak_4648	AT2G22090	Chr2	9389405	9390617	12.1784	11.2899	7.06602	6.75045
Peak_4653	AT2G22200	Chr2	9443246	9444311	7.64928	7.06478	4.6605	5.28478
Peak_4718	AT2G23300	Chr2	9914356	9915980	6.35667	6.5183	4.97299	4.29239
Peak_4736	AT2G23670	Chr2	10063084	10064016	6.67438	6.22749	3.70897	2.70536
Peak_4771	AT2G24250	Chr2	10314296	10314996	6.80992	7.12748	5.08434	4.7651
Peak_4809	AT2G25010	Chr2	10631463	10632256	8.44509	9.54875	4.78105	5.07774
Peak_4823	AT2G25270	Chr2	10759713	10760462	6.06662	5.40075	3.11419	2.6729
Peak_4852	AT2G25710	Chr2	10952519	10953270	8.52832	8.04121	5.56808	4.72543
Peak_4906	AT2G26530	Chr2	11282788	11284079	3.21442	3.18161	1.61177	0.904343
Peak_4939	AT2G27050	Chr2	11545728	11547506	6.86903	6.72867	4.70802	5.0053
Peak_4983	AT2G27790	Chr2	11848963	11849643	8.03555	8.85882	5.99466	5.28209
Peak_4985	AT2G27810	Chr2	11852078	11853032	8.34596	8.85779	5.90519	5.84353
Peak_5016	AT2G28350	Chr2	12114014	12115925	8.72039	8.53805	6.6752	7.09965
Peak_5049	AT2G28950	Chr2	12432446	12433706	6.57382	6.65508	5.48659	5.61829
Peak_5095	AT2G29910	Chr2	12752191	12753169	8.92698	9.04128	4.29265	5.87954
Peak_5103	AT2G30040	Chr2	12821663	12823034	8.42425	8.38733	6.05742	6.1656
Peak_5137	AT2G30560	Chr2	13018443	13020297	5.42628	5.36279	4.68276	4.48021
Peak_5142	AT2G30620	Chr2	13045147	13046589	9.39246	9.25288	7.16086	7.24821
Peak_5155	AT2G30870	Chr2	13141351	13142630	6.58298	6.94277	5.49532	5.43276
Peak_5193	AT2G31390	Chr2	13385428	13386305	6.61625	7.3581	4.79048	5.12049
Peak_5194	AT2G31400	Chr2	13389491	13390788	9.77746	9.78472	8.17405	8.45899
Peak_5235	AT2G32100	Chr2	13647710	13648879	5.70796	5.58111	3.55162	2.89526
Peak_5259	AT2G32500	Chr2	13796406	13797275	4.06961	4.26456	2.55332	2.21758
Peak_5306	AT2G33310	Chr2	14115159	14116120	7.3339	6.80988	4.34892	4.04039
Peak_5333	AT2G33630	Chr2	14238077	14238903	6.60127	6.99863	5.5445	5.49893
Peak_5337	AT2G33760	Chr2	14275835	14276449	5.64785	6.40817	4.27467	4.10614
Peak_5344	AT2G33845	Chr2	14317545	14318443	9.77509	10.0843	5.51708	6.76829
Peak_5355	AT2G34090	Chr2	14398544	14399340	6.39606	6.82167	3.98128	4.0271
Peak_5372	AT2G34470	Chr2	14531777	14532588	7.22075	7.38901	5.42789	4.44879
Peak_5378	AT2G34570	Chr2	14564156	14564854	8.89019	8.26673	4.85793	4.51756
Peak_5385	AT2G34650	Chr2	14590079	14591802	5.47651	5.45055	3.9441	4.51321
Peak_5408	AT2G35000	Chr2	14752317	14752926	5.13419	5.54353	4.32902	4.12435
Peak_5413	AT2G35050	Chr2	14768642	14769417	7.12163	6.86816	5.92862	5.52944
Peak_5425	AT2G35345	Chr2	14879871	14880648	6.17529	6.36302	3.43358	4.20114
Peak_5427	AT2G35360	Chr2	14890244	14892028	7.64106	8.34974	5.12703	4.59784
Peak_5431	AT2G35430	Chr2	14901573	14902389	7.16791	6.70946	4.35956	4.12314
Peak_5435	AT2G35490	Chr2	14912883	14914674	9.47787	10.375	7.19648	6.26184
Peak_5464	AT2G35859	Chr2	15059698	15061240	8.17536	7.81125	5.89298	4.97774
Peak_5478	AT2G36080	Chr2	15150835	15151333	7.01506	6.7271	3.85923	2.43828
Peak_5499	AT2G36420	Chr2	15286331	15287360	8.05957	8.05271	6.18305	6.49638
Peak_5502	AT2G36470	Chr2	15299408	15300610	3.9173	4.3755	2.59064	2.46728
Peak_5504	AT2G36490	Chr2	15313690	15314498	4.28475	4.11441	3.68054	3.46798
Peak_5509	AT2G36580	Chr2	15339048	15340157	5.77456	5.58781	4.22003	4.011
Peak_5535	AT2G36970	Chr2	15528935	15529739	4.91763	4.39383	3.15308	2.77266
Peak_5543	AT2G37100	Chr2	15591006	15592080	6.5597	6.334	4.89759	4.00354
Peak_5597	AT2G37980	Chr2	15896809	15897510	6.45291	6.49318	3.07713	3.3825
Peak_5630	AT2G38480	Chr2	16110945	16111876	7.73174	9.19518	4.43962	5.19662
Peak_5632	AT2G38500	Chr2	16118573	16119071	4.5343	3.80494	2.36275	2.53978
Peak_5664	AT2G39020	Chr2	16295238	16296149	8.08081	8.99259	6.03768	6.05835
Peak_5675	AT2G39220	Chr2	16375499	16376996	4.51633	4.64764	3.61055	3.34558
Peak_5694	AT2G39480	Chr2	16484054	16485069	10.1379	10.0545	6.42707	4.97449
Peak_5713	AT2G39770	Chr2	16588588	16589988	4.07912	4.5062	2.5423	2.26403
Peak_5730	AT2G39980	Chr2	16688411	16689990	6.04273	5.49928	3.79366	3.82498
Peak_5745	AT2G40140	Chr2	16772040	16774046	5.83047	5.47014	3.24887	3.53761
Peak_5774	AT2G40570	Chr2	16940754	16941706	9.08896	9.41895	7.85922	7.68126
Peak_5782	AT2G40670	Chr2	16970027	16970762	1.47869	1.77955	0.772952	0.40328
Peak_5793	AT2G40800	Chr2	17026145	17027111	8.04141	7.9257	7.45554	7.17175
Peak_5813	AT2G41060	Chr2	17126925	17128428	9.10549	8.4038	5.87506	6.73339
Peak_5818	AT2G41140	Chr2	17150000	17151441	7.94097	7.82172	7.38636	7.18707
Peak_5828	AT2G41312	Chr2	17225451	17226146	4.59287	4.68425	3.8178	3.39643
Peak_5832	AT2G41370	Chr2	17239127	17240457	5.61041	5.84138	5.12459	5.00159
Peak_5853	AT2G41680	Chr2	17377797	17379204	7.47689	7.69355	5.69174	6.17944
Peak_5861	AT2G41790	Chr2	17435491	17436323	7.45725	7.57602	6.63573	6.22852
Peak_5862	AT2G41820	Chr2	17446701	17447828	7.72065	7.24241	5.06739	4.2425
Peak_5909	AT2G42540	Chr2	17711374	17712016	3.29353	3.00045	1.73103	1.47641
Peak_5914	AT2G42620	Chr2	17755982	17757653	9.89957	10.6005	7.63125	7.47558
Peak_5938	AT2G42975	Chr2	17873838	17874784	8.04956	8.41895	6.31204	6.38294
Peak_5952	AT2G43210	Chr2	17960620	17961244	7.40809	6.871	4.96763	4.63595
Peak_5953	AT2G43235	Chr2	17970013	17970941	5.95382	5.88536	3.90751	3.21781
Peak_5973	AT2G43465	Chr2	18049134	18049918	6.50433	7.66716	4.17268	4.07665
Peak_5987	AT2G43790	Chr2	18138254	18139177	9.582	8.88728	6.10331	6.26393
Peak_6025	AT2G44430	Chr2	18333488	18334789	5.35724	5.58339	4.63986	4.24273
Peak_6030	AT2G44520	Chr2	18379462	18380424	10.5748	10.0464	9.06185	8.953
Peak_6043	AT2G44740	Chr2	18442217	18443440	3.87992	3.67784	3.13223	2.95132
Peak_6075	AT2G45240	Chr2	18655829	18656558	8.41101	8.80954	5.38092	3.79166
Peak_6076	AT2G45245	Chr2	18660326	18660695	7.51903	6.91101	3.31066	2.98597
Peak_6077	AT2G45250	Chr2	18660808	18662258	8.50864	8.04676	7.12787	7.0532
Peak_6082	AT2G45310	Chr2	18682455	18683954	8.21185	8.52515	5.92057	6.29905
Peak_6092	AT2G45520	Chr2	18755763	18757136	7.64734	7.78621	6.91698	6.70182
Peak_6123	AT2G46020	Chr2	18922749	18923674	8.48904	8.01333	5.90824	6.06597
Peak_6130	AT2G46110	Chr2	18955889	18956640	9.17519	9.46181	4.87579	5.06061
Peak_6162	AT2G46520	Chr2	19096608	19097619	10.6703	10.6913	7.17756	7.00066
Peak_6169	AT2G46600	Chr2	19136012	19137201	3.33356	3.49292	2.34181	2.58332
Peak_6202	AT2G47160	Chr2	19359916	19361254	4.98753	5.21448	2.84386	3.41475
Peak_6220	AT2G47440	Chr2	19469592	19471633	8.39941	8.2852	7.02892	7.0572
Peak_6242	AT2G47800	Chr2	19574794	19576837	5.00982	4.09418	2.03297	2.13093
Peak_6267	AT3G01040	Chr3	8870	9990	7.66694	7.75205	7.29815	7.2929
Peak_6276	AT3G01150	Chr3	51479	52379	5.53359	5.76497	4.58845	4.75578
Peak_6312	AT3G01690	Chr3	256523	258099	5.74053	6.39928	4.32893	3.68586
Peak_6337	AT3G02130	Chr3	380408	381622	8.04028	7.5168	4.57658	4.8519
Peak_6346	AT3G02250	Chr3	425856	427065	6.84505	6.43233	4.66071	3.75544
Peak_6347	AT3G02260	Chr3	447775	448786	7.72691	8.27276	6.36053	6.2069
Peak_6353	AT3G02335	Chr3	476798	477943	8.77105	9.38463	5.95802	5.13375
Peak_6358	AT3G02400	Chr3	489673	490694	12.237	12.9585	7.03703	5.98598
Peak_6364	AT3G02510	Chr3	524030	524647	6.2913	6.24747	5.57279	5.49084
Peak_6366	AT3G02530	Chr3	531880	532698	8.85028	10.0382	6.15953	6.6672
Peak_6411	AT3G03090	Chr3	704099	704857	6.96612	6.92423	5.80226	5.77433
Peak_6423	AT3G03250	Chr3	753300	754258	8.64153	9.12544	6.17042	6.49958
Peak_6449	AT3G03740	Chr3	938982	940820	9.47005	8.78731	6.71089	6.37529
Peak_6481	AT3G04140	Chr3	1086655	1088635	6.43021	7.49448	4.35875	4.52345
Peak_6487	AT3G04310	Chr3	1141823	1142731	10.0174	10.0213	6.53055	7.42074
Peak_6494	AT3G04470	Chr3	1191403	1192558	8.54132	8.75631	5.24115	4.16929
Peak_6506	AT3G04630	Chr3	1258665	1259272	4.04105	4.51567	2.84191	2.19681
Peak_6515	AT3G04740	Chr3	1293689	1294686	9.66578	8.1988	5.07129	5.05595
Peak_6516	AT3G04750	Chr3	1302640	1303471	8.5223	8.52371	5.875	4.52871
Peak_6551	AT3G05210	Chr3	1479418	1480249	8.15564	8.87621	6.44127	6.05197
Peak_6566	AT3G05425	Chr3	1567589	1568323	7.12308	6.8138	3.4742	3.17935
Peak_6575	AT3G05570	Chr3	1616873	1617443	4.42254	4.93823	2.42992	2.80122
Peak_6594	AT3G05830	Chr3	1736571	1737450	4.80502	4.58284	3.37288	2.99678
Peak_6598	AT3G05880	Chr3	1755557	1756664	3.82902	3.08065	1.32347	1.20547
Peak_6624	AT3G06190	Chr3	1875869	1877033	10.5449	9.97872	6.95578	7.03566
Peak_6629	AT3G06270	Chr3	1896101	1897250	5.31049	5.42008	4.34262	3.9821
Peak_6659	AT3G06620	Chr3	2066448	2067453	8.90516	9.14049	6.95108	6.7462
Peak_6667	AT3G06700	Chr3	2117186	2118687	7.32734	6.74234	5.40768	4.96698
Peak_6675	AT3G06790	Chr3	2145153	2145906	10.2943	9.91628	6.20627	6.1969
Peak_6681	AT3G06860	Chr3	2161760	2162477	6.94724	7.71004	5.23299	4.35208
Peak_6708	AT3G07215	Chr3	2297312	2298806	9.62435	9.31866	6.95039	6.83853
Peak_6716	AT3G07320	Chr3	2332567	2334059	4.61114	4.88331	3.30866	3.05306
Peak_6731	AT3G07500	Chr3	2392229	2392832	5.28659	5.5206	3.95861	3.99371
Peak_6753	AT3G07760	Chr3	2476351	2477137	4.92534	5.51351	3.52003	3.3135
Peak_6767	AT3G07960	Chr3	2534810	2535870	5.30857	5.03326	2.58435	3.33923
Peak_6773	AT3G08505	Chr3	2581395	2582224	7.92979	7.73112	6.9407	6.95206
Peak_6775	AT3G08530	Chr3	2594757	2595720	8.79831	9.11598	6.61981	7.04623
Peak_6810	AT3G08960	Chr3	2736149	2737086	9.58339	9.79685	6.62876	5.69579
Peak_6812	AT3G09000	Chr3	2745592	2746544	7.67754	7.2944	5.29345	4.82875
Peak_6816	AT3G09032	Chr3	2757424	2758181	6.02901	6.9085	3.9173	3.88934
Peak_6841	AT3G09440	Chr3	2903940	2905853	8.69344	8.87189	5.51563	6.1384
Peak_6855	AT3G09650	Chr3	2958533	2959609	10.8826	9.85355	7.40492	7.66631
Peak_6862	AT3G09735	Chr3	2987328	2988078	6.9525	6.94309	5.26025	5.4814
Peak_6891	AT3G10190	Chr3	3155267	3155988	5.62978	5.57105	4.82552	4.8239
Peak_6893	AT3G10230	Chr3	3165098	3166158	8.12382	8.57786	5.33632	6.17447
Peak_6904	AT3G10370	Chr3	3216284	3217223	12.1079	11.5277	6.01572	6.24753
Peak_6906	AT3G10400	Chr3	3232527	3233505	8.08	7.83457	5.41755	5.45726
Peak_6909	AT3G10420	Chr3	3239017	3240324	10.6365	9.72252	8.14037	7.67303
Peak_6929	AT3G10690	Chr3	3345658	3346361	7.7931	7.76466	3.61715	2.95462
Peak_6933	AT3G10730	Chr3	3359799	3360766	10.1235	10.1758	6.38074	6.28827
Peak_6940	AT3G10820	Chr3	3387071	3387914	8.0648	8.45136	5.36304	4.44758
Peak_6972	AT3G11410	Chr3	3584107	3585957	9.41057	9.33294	6.58593	6.25378
Peak_6985	AT3G11590	Chr3	3660234	3661383	10.3362	9.78318	7.67844	6.79149
Peak_6999	AT3G11780	Chr3	3724852	3725663	6.14736	6.51144	5.07396	4.98113
Peak_7005	AT3G11850	Chr3	3740779	3741757	7.56628	7.94766	5.84104	6.2898
Peak_7019	AT3G12050	Chr3	3839047	3840187	11.0588	12.2212	8.93232	8.93027
Peak_7050	AT3G12520	Chr3	3971240	3972083	8.42764	8.83095	5.22768	5.66588
Peak_7051	AT3G12530	Chr3	3973836	3974463	4.92326	6.05983	3.10588	2.8283
Peak_7057	AT3G12590	Chr3	4003063	4003923	10.264	11.16	6.7934	7.59778
Peak_7071	AT3G12780	Chr3	4061527	4063396	9.04726	8.38906	5.07917	5.57676
Peak_7093	AT3G13110	Chr3	4214647	4216276	9.72976	9.15891	8.0938	7.86186
Peak_7148	AT3G13780	Chr3	4525003	4525796	1.91657	1.89581	1.30837	1.12146
Peak_7153	AT3G13850	Chr3	4559897	4560772	3.30492	3.92745	2.30592	2.09348
Peak_7174	AT3G14090	Chr3	4670357	4671665	9.54683	8.8153	6.99501	6.77727
Peak_7208	AT3G14650	Chr3	4921990	4923375	6.08547	5.50675	3.74765	4.29918
Peak_7239	AT3G15095	Chr3	5081789	5084111	8.97546	8.60025	6.30087	6.53462
Peak_7253	AT3G15290	Chr3	5144866	5145652	8.90333	9.36878	7.71802	7.33939
Peak_7266	AT3G15395	Chr3	5200580	5201365	7.03103	6.98607	6.6579	6.72684
Peak_7333	AT3G16370	Chr3	5556849	5558823	1.9877	2.02766	1.1659	1.20527
Peak_7338	AT3G16510	Chr3	5617104	5618322	8.59267	8.88543	6.70756	7.14817
Peak_7386	AT3G17280	Chr3	5904197	5904676	5.20455	4.49049	2.07838	2.75564
Peak_7394	AT3G17380	Chr3	5952182	5954070	8.24607	8.32775	5.74263	5.89478
Peak_7458	AT3G18270	Chr3	6261791	6262767	9.48052	9.22012	7.62276	6.88978
Peak_7499	AT3G18930	Chr3	6523972	6525450	9.5453	9.52619	6.37813	7.13868
Peak_7513	AT3G19150	Chr3	6616750	6617732	6.25222	5.67348	4.20329	4.37823
Peak_7545	AT3G19680	Chr3	6840212	6842043	9.1822	9.39694	8.63894	8.46793
Peak_7560	AT3G19910	Chr3	6926212	6927208	9.75935	10.1445	7.29382	8.01329
Peak_7570	AT3G20015	Chr3	6978704	6980361	7.69782	7.50744	5.49915	5.81387
Peak_7612	AT3G20780	Chr3	7267934	7269390	7.12843	7.2602	5.38957	4.68708
Peak_7625	AT3G20978	Chr3	7353915	7354417	7.47443	7.01079	5.21712	5.17966
Peak_7631	AT3G21140	Chr3	7411360	7412290	3.24378	3.30324	1.59406	1.75347
Peak_7642	AT3G21295	Chr3	7489124	7490158	8.27214	8.6033	7.55406	7.70201
Peak_7646	AT3G21390	Chr3	7531355	7532245	8.18534	8.35322	6.3254	6.69819
Peak_7650	AT3G21480	Chr3	7567502	7568135	5.21107	5.53618	3.68955	3.63196
Peak_7653	AT3G21560	Chr3	7595814	7597357	5.0157	5.17132	3.4206	3.60063
Peak_7736	AT3G23200	Chr3	8281321	8282146	9.66222	9.91176	7.606	7.05559
Peak_7765	AT3G23700	Chr3	8532756	8534830	9.15247	9.32219	7.93093	8.26754
Peak_7768	AT3G23760	Chr3	8563924	8564803	4.83848	5.57864	2.69831	3.20424
Peak_7782	AT3G23990	Chr3	8668795	8669653	9.07575	9.34861	7.52222	6.7722
Peak_7785	AT3G24030	Chr3	8680106	8680943	8.16612	8.24483	5.75985	6.19557
Peak_7811	AT3G24506	Chr3	8928648	8929432	2.64675	2.64675	0.756213	0.189054
Peak_7829	AT3G24820	Chr3	9063741	9065366	9.97173	10.0253	7.42049	6.70771
Peak_7842	AT3G25150	Chr3	9159223	9159988	7.25151	6.50883	5.20645	4.96351
Peak_7847	AT3G25250	Chr3	9195488	9196473	2.16095	1.95907	0.748987	1.02135
Peak_7859	AT3G25540	Chr3	9274437	9275385	7.906	8.01149	7.21221	7.28296
Peak_7871	AT3G25700	Chr3	9358758	9360414	7.31436	7.96334	5.69795	5.46339
Peak_7877	AT3G25805	Chr3	9427467	9428335	8.5037	8.25296	7.18898	6.74984
Peak_7910	AT3G26360	Chr3	9655804	9657508	9.27966	9.8102	6.9088	7.29704
Peak_7953	AT3G26935	Chr3	9934640	9935594	4.4733	4.97773	3.108	2.59
Peak_7994	AT3G27470	Chr3	10163022	10163485	5.02102	4.54887	3.10196	2.71866
Peak_8000	AT3G27570	Chr3	10215810	10216785	10.6319	9.84986	8.16276	7.40853
Peak_8006	AT3G27740	Chr3	10283196	10283969	8.16265	7.1233	5.34133	5.36569
Peak_8010	AT3G27830	Chr3	10318380	10319563	8.46069	7.79319	5.69319	6.17169
Peak_8022	AT3G28040	Chr3	10434961	10436862	5.75974	6.55425	3.5112	3.12107
Peak_8056	AT3G28900	Chr3	10903801	10904546	8.1422	8.1343	4.96237	5.06816
Peak_8064	AT3G29000	Chr3	11005917	11007191	2.96998	3.02726	2.5358	2.59308
Peak_8175	AT3G44530	Chr3	16115668	16116452	7.30706	7.41209	6.23876	6.57936
Peak_8212	AT3G45260	Chr3	16597326	16598644	4.15054	4.48898	2.5423	2.83877
Peak_8230	AT3G45860	Chr3	16864722	16866117	1.73216	1.4841	0.640383	0.662321
Peak_8231	AT3G45880	Chr3	16870836	16872502	7.86258	8.13814	5.25962	5.96477
Peak_8237	AT3G46020	Chr3	16912866	16914323	3.35739	3.3687	2.61579	2.74828
Peak_8284	AT3G46970	Chr3	17304680	17306460	2.02831	2.16652	1.08326	0.660671
Peak_8317	AT3G47590	Chr3	17536825	17537562	8.78586	8.23525	6.97283	7.24096
Peak_8318	AT3G47600	Chr3	17539749	17540455	2.92875	3.2986	1.58433	0.862967
Peak_8352	AT3G48090	Chr3	17756411	17757866	1.43751	1.62599	0.508021	0.611567
Peak_8354	AT3G48110	Chr3	17762925	17763895	10.6878	9.99641	8.19145	7.79481
Peak_8355	AT3G48115	Chr3	17771247	17772792	8.19988	8.67451	7.19727	6.78511
Peak_8378	AT3G48440	Chr3	17941248	17942087	2.8268	3.28952	1.83966	1.90697
Peak_8395	AT3G48750	Chr3	18071430	18072239	7.14552	6.8387	6.04621	5.83246
Peak_8396	AT3G48760	Chr3	18075727	18076560	8.46938	8.58659	6.36651	6.56988
Peak_8470	AT3G50080	Chr3	18572585	18573599	9.18941	9.11398	7.64837	7.11806
Peak_8511	AT3G50835	Chr3	18896518	18898500	2.8641	2.76906	2.02067	2.24519
Peak_8526	AT3G51120	Chr3	18991113	18992121	10.9133	10.6962	6.47399	4.74635
Peak_8527	AT3G51130	Chr3	18994022	18994901	8.32915	8.17523	6.72034	6.83411
Peak_8528	AT3G51135	Chr3	18997704	18998365	5.04938	5.51019	3.30754	2.86808
Peak_8558	AT3G51610	Chr3	19141375	19142246	9.3173	10.4695	5.9621	5.97291
Peak_8571	AT3G51800	Chr3	19212753	19213797	8.82529	8.84896	6.78071	7.52348
Peak_8635	AT3G52760	Chr3	19553882	19554941	9.46822	10.5816	7.01921	6.2503
Peak_8657	AT3G53180	Chr3	19706828	19707721	6.52682	7.01956	4.7917	5.24492
Peak_8662	AT3G53270	Chr3	19752464	19753273	6.94049	7.7228	4.53247	4.82185
Peak_8670	AT3G53390	Chr3	19792414	19793331	5.7198	5.88275	3.99924	3.844
Peak_8677	AT3G53480	Chr3	19829395	19830150	9.01914	9.27465	5.9359	5.14757
Peak_8695	AT3G53740	Chr3	19914391	19915120	6.47485	6.49744	5.42932	5.28573
Peak_8713	AT3G53970	Chr3	19985050	19985852	10.4377	10.1839	7.9412	7.4029
Peak_8741	AT3G54360	Chr3	20130917	20131959	8.82188	8.55312	7.05683	7.60228
Peak_8742	AT3G54363	Chr3	20132162	20133690	4.65895	5.23053	3.39715	3.68834
Peak_8758	AT3G54650	Chr3	20227891	20229098	4.14971	4.02686	3.25854	3.53253
Peak_8829	AT3G55620	Chr3	20634150	20635220	5.90456	5.81988	4.3891	3.56539
Peak_8870	AT3G56250	Chr3	20865933	20866815	6.86157	6.57478	3.53083	4.45789
Peak_8872	AT3G56270	Chr3	20869910	20870702	7.26305	6.87985	4.26129	4.68311
Peak_8889	AT3G56550	Chr3	20953960	20954642	7.87061	7.88268	5.95124	5.3356
Peak_8902	AT3G56750	Chr3	21019507	21020557	8.02517	8.44991	5.54287	5.96201
Peak_8907	AT3G56850	Chr3	21047446	21048543	8.37033	8.0571	5.82802	5.97177
Peak_8913	AT3G56930	Chr3	21073480	21074176	6.31501	6.11053	5.6154	5.58161
Peak_8978	AT3G57980	Chr3	21468033	21469399	8.46109	8.65496	6.51383	6.66118
Peak_8984	AT3G58050	Chr3	21492062	21493137	9.68318	9.28254	8.28095	7.89346
Peak_8992	AT3G58170	Chr3	21543216	21544751	9.09599	9.51468	7.72646	8.12521
Peak_9009	AT3G58630	Chr3	21684717	21686012	9.49809	10.4651	7.70408	7.60412
Peak_9082	AT3G59940	Chr3	22142751	22144797	6.52497	6.45247	5.25968	5.16992
Peak_9107	AT3G60320	Chr3	22293386	22295533	9.39634	9.68147	6.585	6.87892
Peak_9115	AT3G60410	Chr3	22331376	22332870	11.3718	11.9745	9.44235	8.6364
Peak_9134	AT3G60750	Chr3	22453747	22456364	7.76613	7.81292	5.37718	4.95833
Peak_9146	AT3G60961	Chr3	22546670	22548177	6.31718	6.49526	4.50201	4.52701
Peak_9192	AT3G61670	Chr3	22818530	22819587	4.92619	5.37595	2.94569	3.31864
Peak_9193	AT3G61690	Chr3	22827712	22828846	9.48492	9.05945	6.46407	5.72417
Peak_9194	AT3G61700	Chr3	22835094	22836244	6.36398	7.16216	4.73077	4.00013
Peak_9198	AT3G61760	Chr3	22860474	22861000	4.94824	4.45207	3.61843	3.4888
Peak_9205	AT3G61820	Chr3	22880074	22881627	7.06699	8.285	4.45742	3.87988
Peak_9215	AT3G61970	Chr3	22951387	22952989	5.2771	5.10002	3.90896	4.07356
Peak_9232	AT3G62200	Chr3	23024811	23025868	7.6804	8.25373	6.08176	5.94706
Peak_9236	AT3G62285	Chr3	23051501	23052362	8.09179	8.24483	5.24422	5.26882
Peak_9239	AT3G62330	Chr3	23065026	23065836	4.99744	5.63791	2.56335	2.67373
Peak_9243	AT3G62410	Chr3	23090824	23092939	6.38846	5.89139	4.08512	4.15526
Peak_9250	AT3G62550	Chr3	23135970	23138221	5.77201	6.23487	4.86876	4.71081
Peak_9258	AT3G62660	Chr3	23172844	23174824	8.9149	9.27877	7.001	7.11695
Peak_9265	AT3G62780	Chr3	23221989	23222921	4.83	5.0749	2.33042	2.91744
Peak_9266	AT3G62790	Chr3	23223627	23224399	5.99887	6.25181	5.18368	4.72962
Peak_9268	AT3G62830	Chr3	23232255	23233516	8.82814	8.70215	5.35251	5.24892
Peak_9290	AT3G63170	Chr3	23334501	23335315	6.4947	6.74327	5.27062	4.67665
Peak_9314	AT3G63530	Chr3	23457619	23458581	5.95398	6.37228	4.33706	4.46916
Peak_9346	AT4G00500	Chr4	226488	228154	5.24619	5.4942	4.27114	4.12277
Peak_9366	AT4G00800	Chr4	344753	345837	10.5332	9.1263	6.24957	6.00098
Peak_9374	AT4G00905	Chr4	387736	388241	5.82398	5.87054	4.20156	3.32168
Peak_9393	AT4G01130	Chr4	485794	486395	3.63328	3.59024	2.21479	2.21675
Peak_9396	AT4G01210	Chr4	511796	512867	8.86451	8.82385	6.60883	6.47369
Peak_9451	AT4G02050	Chr4	899678	900274	3.85114	4.04448	2.6299	1.91373
Peak_9467	AT4G02370	Chr4	1042207	1043357	8.41777	7.96955	6.16341	6.189
Peak_9481	AT4G02510	Chr4	1104459	1105712	9.50343	9.70725	7.47275	6.69318
Peak_9485	AT4G02550	Chr4	1121461	1122182	7.11593	7.27744	5.19747	4.85489
Peak_9492	AT4G02620	Chr4	1150711	1152671	6.70782	6.85918	5.42788	5.3432
Peak_9494	AT4G02660	Chr4	1173613	1174281	5.21134	6.26769	2.8856	3.23948
Peak_9605	AT4G05050	Chr4	2587502	2589454	7.06157	7.22319	6.38309	6.15513
Peak_9613	AT4G05320	Chr4	2718079	2720613	7.10695	6.46716	5.42593	5.2898
Peak_9622	AT4G05520	Chr4	2804434	2804969	6.83846	6.15945	4.53773	3.77962
Peak_9623	AT4G05530	Chr4	2816338	2817082	7.27568	7.29624	5.90497	5.47179
Peak_9641	AT4G07990	Chr4	4828453	4829227	7.95303	8.06853	6.68553	6.53204
Peak_9692	AT4G09180	Chr4	5847328	5848258	10.1046	9.07348	6.87216	7.28587
Peak_9748	AT4G10430	Chr4	6457154	6458169	10.2759	10.051	8.42335	8.95896
Peak_9779	AT4G11100	Chr4	6768479	6769231	6.52109	6.02368	4.41726	4.09974
Peak_9783	AT4G11140	Chr4	6795059	6796059	6.52338	7.06817	3.9465	3.18874
Peak_9789	AT4G11230	Chr4	6845033	6845600	8.45426	7.53978	2.98398	4.20122
Peak_9796	AT4G11350	Chr4	6901664	6902568	4.97292	5.04581	4.2402	4.14389
Peak_9814	AT4G11740	Chr4	7071730	7072549	5.93225	6.23533	4.83629	4.5088
Peak_9862	AT4G12710	Chr4	7486048	7486907	9.20079	9.32953	6.0809	5.66867
Peak_9890	AT4G13170	Chr4	7655979	7656690	7.60959	6.99255	4.07609	4.49297
Peak_9907	AT4G13500	Chr4	7857068	7859956	6.92471	6.9349	4.55804	4.41779
Peak_9962	AT4G14300	Chr4	8230867	8231794	8.80074	9.59781	6.43619	5.48302
Peak_9991	AT4G14710	Chr4	8425794	8426573	6.17003	5.99939	5.29269	5.49656
Peak_10000	AT4G14820	Chr4	8509400	8510069	7.33069	7.04766	6.01046	5.42858
Peak_10002	AT4G14840	Chr4	8513643	8514530	5.10129	4.17812	2.31587	1.94449
Peak_10045	AT4G15550	Chr4	8877958	8879387	5.75161	6.01765	4.92054	4.98479
Peak_10055	AT4G15780	Chr4	8981035	8981903	7.00193	7.15916	5.46492	5.57878
Peak_10071	AT4G16050	Chr4	9094219	9095176	8.67391	7.87107	6.04162	5.50311
Peak_10092	AT4G16340	Chr4	9240235	9241421	7.06005	7.9263	5.12808	4.50097
Peak_10093	AT4G16360	Chr4	9245064	9246372	6.36875	6.91043	3.98699	3.90872
Peak_10099	AT4G16430	Chr4	9267158	9268259	9.00048	9.49854	6.92377	7.17388
Peak_10110	AT4G16530	Chr4	9313509	9314600	9.1131	9.95549	6.82323	6.61507
Peak_10131	AT4G16790	Chr4	9451967	9453231	3.82214	4.16478	2.85194	2.35753
Peak_10151	AT4G17060	Chr4	9594273	9595343	8.89698	9.47325	6.84704	6.25649
Peak_10163	AT4G17250	Chr4	9670945	9672209	5.40406	5.9292	3.90221	3.61358
Peak_10181	AT4G17500	Chr4	9759311	9760327	5.05877	4.81556	3.67711	3.3563
Peak_10195	AT4G17670	Chr4	9834012	9834665	3.14809	3.23994	1.88021	1.98107
Peak_10208	AT4G17880	Chr4	9933805	9935641	7.36834	6.98685	5.72182	5.42304
Peak_10225	AT4G18120	Chr4	10038381	10038787	6.56634	7.09593	5.24092	5.26118
Peak_10228	AT4G18160	Chr4	10055389	10056570	10.7619	10.8227	8.55573	8.89852
Peak_10253	AT4G18700	Chr4	10289507	10290920	6.71714	7.13696	5.85834	5.76922
Peak_10263	AT4G18840	Chr4	10339614	10340336	7.18103	7.65509	4.71947	5.51122
Peak_10269	AT4G18950	Chr4	10375310	10377137	4.87177	5.27318	3.45618	2.92268
Peak_10293	AT4G19350	Chr4	10563105	10563777	6.4632	6.63646	4.9721	5.29238
Peak_10298	AT4G19440	Chr4	10603815	10604717	2.11175	2.02305	1.68131	1.69827
Peak_10317	AT4G19865	Chr4	10781579	10782520	7.2833	7.6084	5.73537	6.29803
Peak_10324	AT4G19985	Chr4	10831541	10832809	1.98811	1.87117	1.16948	1.16948
Peak_10331	AT4G20115	Chr4	10878775	10879586	8.95269	10.2263	6.407	5.24368
Peak_10379	AT4G21350	Chr4	11356354	11357576	11.3912	11.6002	6.79541	7.59573
Peak_10402	AT4G21670	Chr4	11511027	11511989	8.77687	9.06552	5.29352	5.69714
Peak_10454	AT4G22570	Chr4	11883976	11885568	3.73757	3.58008	2.83478	2.62184
Peak_10498	AT4G23220	Chr4	12155745	12156914	2.65868	2.33654	1.01475	0.634218
Peak_10531	AT4G23850	Chr4	12407515	12408432	7.679	7.46474	6.95922	6.86685
Peak_10557	AT4G24230	Chr4	12567688	12568957	9.42358	9.32528	7.93785	8.37746
Peak_10560	AT4G24280	Chr4	12589838	12591148	11.2707	11.1602	8.03729	7.35809
Peak_10565	AT4G24370	Chr4	12611454	12612206	10.0593	9.7527	7.53312	7.83345
Peak_10583	AT4G24630	Chr4	12714511	12715298	7.348	7.6589	5.71129	5.98184
Peak_10589	AT4G24710	Chr4	12748613	12749105	4.95502	5.06014	2.70447	1.36418
Peak_10598	AT4G24805	Chr4	12785217	12786084	8.06978	8.4538	6.1402	5.08043
Peak_10612	AT4G25020	Chr4	12861249	12862052	5.95215	5.9961	4.85636	4.83293
Peak_10616	AT4G25080	Chr4	12876783	12878274	8.34508	8.05694	6.23335	6.86333
Peak_10666	AT4G25880	Chr4	13154818	13155639	6.15281	6.04964	4.90047	5.33034
Peak_10691	AT4G26270	Chr4	13303477	13304376	4.79116	5.04112	3.69054	3.31756
Peak_10706	AT4G26540	Chr4	13395372	13398222	7.65198	7.39254	5.18973	5.98625
Peak_10707	AT4G26550	Chr4	13403662	13404434	8.1915	8.0955	5.26139	4.03176
Peak_10714	AT4G26630	Chr4	13435029	13435829	6.43764	5.82446	3.77318	4.33343
Peak_10731	AT4G26860	Chr4	13503946	13504870	8.6472	8.44601	7.12684	6.41378
Peak_10781	AT4G27620	Chr4	13790318	13791057	8.17479	7.71639	6.50832	6.47331
Peak_10818	AT4G28080	Chr4	13955767	13958156	4.70295	4.7956	3.21366	2.70015
Peak_10830	AT4G28270	Chr4	14007703	14009099	5.31247	5.5047	3.82437	3.49978
Peak_10840	AT4G28430	Chr4	14057757	14058404	5.48201	4.78767	3.11907	2.51926
Peak_10853	AT4G28630	Chr4	14140013	14141141	8.84991	8.98345	5.7285	4.83027
Peak_10864	AT4G28760	Chr4	14207387	14208849	8.145	7.385	6.13954	6.10976
Peak_10865	AT4G28770	Chr4	14212772	14213725	8.47817	8.35224	5.45334	6.31635
Peak_10872	AT4G28990	Chr4	14291000	14291782	7.96052	7.41899	5.43187	4.23148
Peak_10897	AT4G29420	Chr4	14471473	14472833	9.91248	8.99341	7.14921	7.05835
Peak_10905	AT4G29610	Chr4	14517412	14518250	3.16849	3.5349	1.75201	1.2382
Peak_10917	AT4G29810	Chr4	14594637	14595421	7.82921	7.35657	5.29349	5.06994
Peak_10930	AT4G30060	Chr4	14691623	14692514	6.54146	6.08327	4.51722	4.96354
Peak_10933	AT4G30097	Chr4	14713410	14714451	7.2422	7.5067	5.91516	6.18532
Peak_10948	AT4G30350	Chr4	14847829	14849921	8.12834	8.57966	6.52169	5.94938
Peak_10950	AT4G30370	Chr4	14858702	14859405	7.30122	8.38202	4.10568	4.85856
Peak_10958	AT4G30500	Chr4	14903405	14904038	6.19012	6.81062	4.68532	3.8679
Peak_10998	AT4G31040	Chr4	15112933	15114979	6.35063	6.51922	5.52896	5.24415
Peak_11056	AT4G31880	Chr4	15423346	15424318	8.53172	9.91413	5.79353	6.00659
Peak_11087	AT4G32290	Chr4	15589804	15591175	8.20534	7.55804	5.67282	6.01622
Peak_11096	AT4G32400	Chr4	15638510	15639523	10.2834	9.83618	7.81853	8.08222
Peak_11113	AT4G32620	Chr4	15731391	15732195	8.46869	9.0993	7.1899	6.63684
Peak_11131	AT4G32890	Chr4	15875431	15876624	7.5109	7.10152	5.09605	4.72317
Peak_11145	AT4G33050	Chr4	15945085	15946956	3.8053	3.35103	2.15684	2.31603
Peak_11174	AT4G33500	Chr4	16115344	16117493	9.52948	10.125	7.17875	6.60244
Peak_11245	AT4G34460	Chr4	16478542	16479582	9.76096	9.00516	6.43339	7.20164
Peak_11251	AT4G34555	Chr4	16504861	16505479	8.58923	9.86791	6.27923	6.35345
Peak_11281	AT4G35000	Chr4	16666745	16667761	8.02594	7.90665	5.68417	4.37779
Peak_11283	AT4G35040	Chr4	16680299	16681338	8.44075	9.27543	5.29911	6.19382
Peak_11311	AT4G35510	Chr4	16861496	16862460	7.72243	7.11826	5.88428	6.06615
Peak_11344	AT4G35987	Chr4	17034905	17035673	8.24176	8.16059	6.56155	5.9826
Peak_11357	AT4G36220	Chr4	17138450	17139771	2.02067	1.90841	1.634	1.68389
Peak_11380	AT4G36650	Chr4	17284684	17285666	3.61258	3.85222	2.38682	2.39641
Peak_11416	AT4G37110	Chr4	17485546	17486456	6.18911	6.246	4.51481	4.39845
Peak_11418	AT4G37130	Chr4	17489375	17490234	9.97596	9.65685	5.52896	5.98778
Peak_11427	AT4G37260	Chr4	17540438	17541773	7.42934	7.37644	5.31876	4.77657
Peak_11435	AT4G37380	Chr4	17573040	17574018	8.157	8.18347	6.95631	7.27634
Peak_11455	AT4G37680	Chr4	17700667	17701407	8.30841	7.6265	5.2009	5.8081
Peak_11459	AT4G37740	Chr4	17726767	17727736	7.37784	7.80891	5.29539	5.23468
Peak_11461	AT4G37790	Chr4	17768064	17769447	6.76317	7.06018	3.92923	3.62116
Peak_11480	AT4G38130	Chr4	17898675	17899601	8.02374	8.43033	6.5829	6.21698
Peak_11483	AT4G38180	Chr4	17908809	17909816	9.05108	9.4951	6.99104	6.92795
Peak_11485	AT4G38210	Chr4	17923281	17923822	5.42411	6.10213	3.70083	4.0833
Peak_11488	AT4G38240	Chr4	17934568	17936771	10.4824	10.7052	6.45617	7.73875
Peak_11511	AT4G38620	Chr4	18053710	18054969	3.69428	2.89597	1.23859	0.544982
Peak_11526	AT4G38800	Chr4	18114218	18115208	8.34466	8.06298	5.24141	4.67568
Peak_11531	AT4G38900	Chr4	18140654	18141969	8.56971	9.33674	7.20751	7.31671
Peak_11532	AT4G38910	Chr4	18146257	18148036	8.03904	8.34739	6.96178	6.5866
Peak_11542	AT4G39050	Chr4	18193072	18194282	9.62593	9.4956	7.59026	7.53969
Peak_11558	AT4G39240	Chr4	18269968	18270847	8.11366	7.88746	6.57578	6.25992
Peak_11578	AT4G39580	Chr4	18386132	18386949	4.59902	4.2664	2.90282	2.17712
Peak_11584	AT4G39710	Chr4	18427303	18428532	6.75673	6.71077	5.3328	4.80231
Peak_11589	AT4G39800	Chr4	18469805	18472079	5.95232	6.12369	4.77915	4.24538
Peak_11594	AT4G39860	Chr4	18499805	18500363	5.47408	5.12009	3.28487	3.59461
Peak_11599	AT4G39910	Chr4	18513479	18514428	8.68124	9.69542	5.51721	5.24198
Peak_11641	AT5G01410	Chr5	172054	173761	8.77582	8.60204	5.49885	5.874
Peak_11645	AT5G01500	Chr5	198877	199560	6.50907	6.72604	4.30839	3.90545
Peak_11649	AT5G01540	Chr5	211188	213359	5.52041	5.67008	4.10126	4.18153
Peak_11659	AT5G01710	Chr5	263861	265749	9.58789	9.29484	7.1493	6.04941
Peak_11678	AT5G01950	Chr5	369216	370176	5.64526	4.83389	3.41093	3.12414
Peak_11698	AT5G02250	Chr5	454709	455587	8.91749	8.99119	6.75344	5.58098
Peak_11717	AT5G02590	Chr5	582933	584047	9.25892	10.1674	6.22825	6.66348
Peak_11725	AT5G02760	Chr5	625392	626458	4.10089	3.78518	1.66354	2.08743
Peak_11732	AT5G02850	Chr5	651992	653419	9.04159	8.33061	5.07837	5.94773
Peak_11747	AT5G03080	Chr5	721742	722730	10.329	9.72754	7.35282	7.3695
Peak_11761	AT5G03285	Chr5	793395	794831	8.51039	8.04155	6.66373	6.87602
Peak_11785	AT5G03555	Chr5	898436	900183	10.1126	10.713	8.25561	8.25157
Peak_11787	AT5G03620	Chr5	921445	921798	5.99896	6.23852	3.93609	4.03924
Peak_11790	AT5G03660	Chr5	937910	938747	7.73321	7.67418	6.72967	6.19838
Peak_11801	AT5G03800	Chr5	1012702	1013756	8.32521	8.55519	6.53892	5.96732
Peak_11810	AT5G03990	Chr5	1075636	1076691	7.55441	7.08707	4.60202	3.751
Peak_11823	AT5G04220	Chr5	1158047	1158762	4.62743	4.43661	3.5006	2.989
Peak_11832	AT5G04320	Chr5	1209167	1209886	8.03053	7.2404	4.9289	4.1764
Peak_11841	AT5G04470	Chr5	1266757	1267351	4.72519	5.45762	3.01287	3.34742
Peak_11847	AT5G04550	Chr5	1304985	1306095	7.61403	7.88119	5.82449	5.77997
Peak_11861	AT5G04760	Chr5	1373650	1374764	8.38532	9.13744	5.30394	3.99301
Peak_11870	AT5G04860	Chr5	1413726	1414667	6.09172	6.02795	4.02363	4.22995
Peak_11877	AT5G04930	Chr5	1444837	1446849	7.18577	6.93008	6.11911	5.63289
Peak_11907	AT5G05480	Chr5	1623377	1624394	10.4339	9.81025	7.26947	7.73575
Peak_11920	AT5G05700	Chr5	1715047	1716485	4.56072	4.64421	3.30923	3.46147
Peak_11928	AT5G05820	Chr5	1753172	1754285	9.94073	10.6111	8.48589	8.0873
Peak_11931	AT5G05850	Chr5	1763594	1764769	7.96639	8.72457	5.76096	5.80504
Peak_11952	AT5G06220	Chr5	1879818	1880835	7.80748	7.56798	7.0265	6.8356
Peak_11960	AT5G06340	Chr5	1936278	1937155	8.73045	8.61508	7.62103	7.77531
Peak_11984	AT5G06750	Chr5	2087614	2088558	7.16172	6.80151	5.09771	4.50942
Peak_12000	AT5G07070	Chr5	2197795	2198502	1.83828	1.82497	1.33421	1.43403
Peak_12029	AT5G07730	Chr5	2457631	2458559	8.932	8.30315	5.59122	3.94682
Peak_12056	AT5G08180	Chr5	2632709	2633540	10.7859	10.3966	6.39172	7.01604
Peak_12060	AT5G08230	Chr5	2649373	2650209	8.80208	8.6107	4.96463	6.03974
Peak_12068	AT5G08330	Chr5	2680610	2682779	8.6378	8.26274	5.63405	6.37767
Peak_12085	AT5G08550	Chr5	2769290	2770540	4.28294	4.57575	3.21432	3.27835
Peak_12086	AT5G08560	Chr5	2773672	2774761	9.12226	9.17953	7.18802	6.08475
Peak_12111	AT5G09310	Chr5	2887824	2888677	9.93158	10.1054	5.90847	7.16217
Peak_12124	AT5G09510	Chr5	2955890	2956777	7.29778	7.40257	5.84937	5.89182
Peak_12125	AT5G09530	Chr5	2959994	2960816	6.94248	8.01155	5.21509	5.08773
Peak_12129	AT5G09620	Chr5	2983682	2985580	7.55636	7.72196	6.2061	6.49142
Peak_12132	AT5G09660	Chr5	2994092	2995722	6.46688	6.26757	4.1856	4.04984
Peak_12135	AT5G09690	Chr5	3002765	3004602	6.84078	6.68058	5.51108	5.95645
Peak_12143	AT5G09810	Chr5	3052057	3053082	9.99206	11.729	5.56199	5.6412
Peak_12151	AT5G09900	Chr5	3091762	3092733	7.6341	7.64379	4.91127	5.87705
Peak_12158	AT5G10040	Chr5	3144096	3144886	8.74068	8.11528	6.58901	5.86832
Peak_12177	AT5G10390	Chr5	3268953	3269566	4.16845	4.10131	2.50721	2.70672
Peak_12200	AT5G10745	Chr5	3396254	3397208	9.52749	8.70609	6.05566	6.69947
Peak_12208	AT5G10830	Chr5	3423587	3424668	9.71875	8.4473	5.96318	5.00089
Peak_12215	AT5G10940	Chr5	3453541	3454323	7.01284	6.51042	4.05698	3.41166
Peak_12256	AT5G11590	Chr5	3727749	3728723	4.87079	4.71858	4.26194	4.26195
Peak_12262	AT5G11670	Chr5	3754274	3755972	4.49989	4.44997	3.48497	3.50508
Peak_12267	AT5G11720	Chr5	3776763	3777871	7.77752	7.58103	6.95866	6.66235
Peak_12295	AT5G12130	Chr5	3919446	3920413	8.46506	9.70495	6.36857	5.97921
Peak_12302	AT5G12220	Chr5	3949999	3950705	7.5118	7.83833	6.58387	6.52723
Peak_12314	AT5G12400	Chr5	4013433	4014394	10.5234	10.3495	8.83129	8.42114
Peak_12352	AT5G13290	Chr5	4253748	4254653	3.31379	3.6076	2.55717	2.77688
Peak_12358	AT5G13390	Chr5	4292597	4294240	12.4253	11.284	7.40372	7.94393
Peak_12362	AT5G13430	Chr5	4306796	4307617	8.81655	8.89536	8.51707	8.42968
Peak_12372	AT5G13530	Chr5	4345268	4346451	8.86458	8.81584	6.69395	7.25104
Peak_12390	AT5G13760	Chr5	4441921	4442933	7.03211	7.2914	6.49726	6.49378
Peak_12403	AT5G13960	Chr5	4501369	4502095	6.82397	7.08967	5.34156	5.48576
Peak_12404	AT5G13970	Chr5	4506992	4507982	10.4519	11.1448	7.27617	7.88828
Peak_12425	AT5G14320	Chr5	4617918	4619037	6.07425	5.93017	5.03523	4.88696
Peak_12475	AT5G15020	Chr5	4864974	4866884	6.79149	6.98933	5.99209	5.66605
Peak_12484	AT5G15210	Chr5	4937782	4939042	10.1363	11.2431	7.75539	7.74605
Peak_12494	AT5G15340	Chr5	4983830	4984237	6.31064	6.73501	4.00983	2.75694
Peak_12502	AT5G15470	Chr5	5023709	5024757	9.19136	9.34406	8.39865	8.15276
Peak_12504	AT5G15500	Chr5	5032609	5033469	9.52389	8.5663	6.28314	6.21064
Peak_12505	AT5G15520	Chr5	5037764	5038185	7.36006	7.12281	4.72528	3.73446
Peak_12519	AT5G15740	Chr5	5136234	5137711	3.96622	4.1256	2.10862	1.1858
Peak_12526	AT5G15833	Chr5	5169735	5170497	7.34949	7.36956	4.70361	5.69003
Peak_12528	AT5G15860	Chr5	5180587	5181495	8.75276	8.5882	5.15707	6.17812
Peak_12534	AT5G15948	Chr5	5205805	5207836	8.07441	7.21712	5.72106	5.46661
Peak_12559	AT5G16300	Chr5	5337829	5338853	4.58378	4.27352	2.17181	2.77854
Peak_12566	AT5G16420	Chr5	5367942	5369001	8.8393	8.92486	6.59142	5.91917
Peak_12577	AT5G16590	Chr5	5431505	5433410	10.0289	11.0565	7.55765	8.18366
Peak_12579	AT5G16620	Chr5	5450587	5451488	9.21373	9.20067	6.33313	5.75859
Peak_12603	AT5G16970	Chr5	5576978	5578182	5.36427	5.41901	4.4308	4.23043
Peak_12612	AT5G17170	Chr5	5649117	5650449	1.55866	1.44733	0.827045	0.667999
Peak_12629	AT5G17490	Chr5	5764276	5765967	5.22785	5.09071	3.68455	3.96579
Peak_12664	AT5G18120	Chr5	5990965	5992017	7.84774	8.54348	6.15314	5.76165
Peak_12730	AT5G19090	Chr5	6387403	6389471	6.03091	6.52106	4.94018	4.57072
Peak_12741	AT5G19220	Chr5	6465179	6466975	4.78998	4.42621	2.73779	3.05568
Peak_12763	AT5G19500	Chr5	6578860	6579851	8.65445	8.89073	6.46145	6.00315
Peak_12772	AT5G19680	Chr5	6649505	6650286	7.14381	6.56092	4.39955	3.85582
Peak_12793	AT5G19970	Chr5	6747479	6747948	4.66873	5.23759	2.94959	3.16511
Peak_12797	AT5G20010	Chr5	6760140	6761755	7.59614	8.39497	5.21788	5.47299
Peak_12820	AT5G20280	Chr5	6849091	6850220	8.33863	8.53355	5.94857	6.03405
Peak_12855	AT5G20890	Chr5	7089230	7090198	10.2103	9.94776	6.7388	6.96125
Peak_12859	AT5G20930	Chr5	7097864	7098752	9.893	9.01459	5.63081	5.54999
Peak_12867	AT5G21060	Chr5	7152195	7152969	8.98344	8.76307	6.12777	4.97882
Peak_12869	AT5G21090	Chr5	7164503	7165672	1.64897	1.77581	0.887904	0.761062
Peak_12886	AT5G21950	Chr5	7255325	7255748	9.48933	9.43377	2.6029	3.71129
Peak_12933	AT5G22788	Chr5	7603055	7603477	5.7026	5.97826	4.14887	3.4806
Peak_12942	AT5G22920	Chr5	7664884	7666611	6.84138	7.00156	5.60084	5.18915
Peak_12947	AT5G23060	Chr5	7736745	7738669	3.0538	2.7754	1.67956	1.85027
Peak_12951	AT5G23100	Chr5	7753431	7754522	5.06727	5.3779	4.39853	4.46218
Peak_12953	AT5G23120	Chr5	7777900	7779107	8.57731	9.23253	5.84723	5.18032
Peak_12986	AT5G23580	Chr5	7951745	7952571	6.88612	7.22366	3.42953	3.27714
Peak_13015	AT5G24030	Chr5	8120848	8122843	1.84051	1.93316	1.3348	1.49826
Peak_13020	AT5G24155	Chr5	8179758	8181109	1.68747	1.68137	1.42089	1.41218
Peak_13056	AT5G24690	Chr5	8457722	8458811	12.7595	13.2792	8.96017	7.60189
Peak_13057	AT5G24710	Chr5	8467332	8469345	7.9916	8.26062	6.1342	5.85817
Peak_13059	AT5G24750	Chr5	8494010	8494700	8.96925	8.09312	4.11645	4.86986
Peak_13091	AT5G25450	Chr5	8857004	8857534	5.88251	5.03296	3.6067	3.46474
Peak_13092	AT5G25460	Chr5	8863366	8865067	4.52587	4.60822	2.83939	3.05185
Peak_13114	AT5G25940	Chr5	9054502	9055334	3.27191	2.71623	1.1849	1.54688
Peak_13116	AT5G26030	Chr5	9096468	9098842	3.97735	4.09886	3.55532	3.49928
Peak_13128	AT5G26360	Chr5	9258242	9259095	8.80202	9.51093	7.1594	7.22699
Peak_13136	AT5G26670	Chr5	9318254	9318995	3.21126	3.35095	2.8668	2.80013
Peak_13151	AT5G26880	Chr5	9458528	9459365	10.8268	12.4951	5.40847	7.06841
Peak_13155	AT5G26960	Chr5	9484794	9486298	6.87995	6.63734	5.12768	4.33881
Peak_13174	AT5G27390	Chr5	9675253	9676909	4.74474	4.94874	3.89175	3.43114
Peak_13182	AT5G27540	Chr5	9722355	9723144	7.45613	6.80906	4.88428	3.96736
Peak_13194	AT5G27740	Chr5	9823652	9824325	8.12075	7.14563	4.60473	3.31156
Peak_13241	AT5G32470	Chr5	12087772	12088740	8.35179	8.96562	5.58164	6.40941
Peak_13336	AT5G37600	Chr5	14934395	14935774	2.29507	2.28653	1.54228	1.49619
Peak_13369	AT5G38470	Chr5	15404571	15405371	8.1566	7.66106	5.13482	4.67604
Peak_13378	AT5G38640	Chr5	15469872	15470873	11.4045	12.1216	8.52459	9.26045
Peak_13379	AT5G38650	Chr5	15472187	15472886	6.20886	6.76076	3.14481	3.28784
Peak_13434	AT5G40060	Chr5	16034375	16035446	5.12225	5.07611	4.15318	4.36414
Peak_13441	AT5G40240	Chr5	16084036	16085271	3.55351	3.5011	2.1565	2.6406
Peak_13454	AT5G40460	Chr5	16202307	16202919	5.06295	4.62871	3.85437	3.63149
Peak_13477	AT5G40830	Chr5	16355491	16356350	6.1576	6.14116	4.14159	4.48809
Peak_13508	AT5G41330	Chr5	16536911	16537994	10.4875	10.2376	5.90763	7.21043
Peak_13517	AT5G41480	Chr5	16595832	16596629	9.79756	8.8426	6.667	6.46775
Peak_13530	AT5G41760	Chr5	16706788	16707492	5.72209	5.89417	3.64376	3.34638
Peak_13552	AT5G42050	Chr5	16815420	16817330	8.41987	8.45561	7.44111	7.40907
Peak_13554	AT5G42080	Chr5	16823879	16824870	9.0534	10.0092	7.14417	6.85803
Peak_13619	AT5G43100	Chr5	17299005	17300022	8.95407	9.21787	7.80516	7.23361
Peak_13651	AT5G43750	Chr5	17580404	17581286	2.56375	2.58776	2.2903	2.32099
Peak_13660	AT5G43880	Chr5	17642501	17643834	6.78622	6.96281	5.24727	5.2199
Peak_13665	AT5G43940	Chr5	17684080	17685394	7.1897	7.86684	5.0714	4.71313
Peak_13721	AT5G44780	Chr5	18067929	18068615	5.68343	5.90288	4.3753	3.81467
Peak_13727	AT5G44870	Chr5	18114477	18115642	7.66803	8.29331	4.90629	4.90932
Peak_13816	AT5G46470	Chr5	18842534	18844135	4.53929	4.29666	3.45997	3.09604
Peak_13835	AT5G46760	Chr5	18973996	18975616	10.9456	11.0779	9.24682	8.28916
Peak_13837	AT5G46790	Chr5	18983824	18984878	6.83254	7.17417	5.76747	5.2048
Peak_13840	AT5G46840	Chr5	19005463	19006428	11.6344	11.0541	8.42406	8.33628
Peak_13854	AT5G47090	Chr5	19127131	19127775	8.68309	10.0015	5.20985	6.0316
Peak_13874	AT5G47400	Chr5	19229144	19230025	9.4093	9.53884	6.31783	5.88917
Peak_13883	AT5G47480	Chr5	19256989	19258146	7.15447	7.54301	5.55554	5.08157
Peak_13909	AT5G47840	Chr5	19375284	19376141	4.85959	5.2371	3.10382	3.47447
Peak_13911	AT5G47870	Chr5	19385076	19385997	7.1743	7.90118	5.01537	5.63367
Peak_13949	AT5G48570	Chr5	19692849	19693819	5.72177	6.14874	3.89376	3.98595
Peak_13989	AT5G49210	Chr5	19949628	19950452	8.9501	8.66028	5.7107	5.39091
Peak_14004	AT5G49480	Chr5	20070676	20071580	7.21276	7.10994	5.92821	5.4753
Peak_14027	AT5G49820	Chr5	20248672	20249684	9.43777	9.34592	7.65533	6.75191
Peak_14057	AT5G50370	Chr5	20510159	20510777	6.18219	5.41917	3.74851	4.07009
Peak_14063	AT5G50420	Chr5	20531817	20532900	9.49872	10.1659	7.64396	7.7624
Peak_14067	AT5G50460	Chr5	20551884	20552704	7.66954	7.04978	5.38704	5.01548
Peak_14075	AT5G50900	Chr5	20705648	20706897	7.57393	7.66722	6.69197	6.89739
Peak_14123	AT5G51590	Chr5	20958558	20959078	7.30211	7.53948	5.3172	5.51389
Peak_14126	AT5G51660	Chr5	20980025	20980933	6.36729	6.85708	5.30867	4.89792
Peak_14151	AT5G52070	Chr5	21161304	21161732	5.56793	6.41905	2.77848	2.40783
Peak_14163	AT5G52320	Chr5	21245505	21246544	1.55836	1.504	0.856193	0.993231
Peak_14193	AT5G52882	Chr5	21437564	21438642	4.0531	4.37075	3.10668	3.16345
Peak_14225	AT5G53340	Chr5	21642764	21645012	8.44017	8.68527	6.57627	6.44535
Peak_14233	AT5G53460	Chr5	21700080	21702607	8.89151	7.67268	4.96572	4.82269
Peak_14257	AT5G53920	Chr5	21892097	21892793	10.2574	10.5109	7.71421	6.75607
Peak_14275	AT5G54260	Chr5	22031965	22032633	6.84692	6.98248	6.38917	6.44199
Peak_14369	AT5G55760	Chr5	22567135	22567737	6.68415	5.89893	4.30309	4.13121
Peak_14408	AT5G56350	Chr5	22821850	22822770	7.51971	7.97754	5.62188	5.96334
Peak_14433	AT5G56790	Chr5	22967926	22968952	7.7402	7.16906	5.68272	5.77907
Peak_14455	AT5G57110	Chr5	23116377	23117635	6.26337	6.33354	4.54106	4.6552
Peak_14513	AT5G58020	Chr5	23485389	23486394	10.6801	9.89683	7.61961	7.88891
Peak_14532	AT5G58290	Chr5	23568979	23570256	8.82545	9.20331	7.90475	7.46238
Peak_14542	AT5G58430	Chr5	23621890	23623540	8.93112	9.49971	7.33737	6.53623
Peak_14600	AT5G59380	Chr5	23952090	23952917	7.96886	8.04425	5.1139	4.01146
Peak_14608	AT5G59480	Chr5	23980803	23981627	5.17247	5.21673	4.72561	4.7456
Peak_14614	AT5G59570	Chr5	24003883	24004844	5.65408	5.38595	4.31341	4.011
Peak_14623	AT5G59730	Chr5	24064310	24066215	4.2046	4.44375	2.61644	2.51696
Peak_14628	AT5G59790	Chr5	24090844	24092204	5.63819	5.62867	4.76152	4.25266
Peak_14639	AT5G59920	Chr5	24128564	24129926	9.43908	10.1624	6.64183	7.01947
Peak_14653	AT5G60270	Chr5	24257659	24258885	2.41902	2.41902	1.49077	1.60116
Peak_14679	AT5G60790	Chr5	24454903	24456080	11.0364	11.2224	9.61863	9.34668
Peak_14685	AT5G60870	Chr5	24487135	24487934	9.35493	9.27543	6.19245	6.44569
Peak_14692	AT5G60970	Chr5	24535588	24537038	3.57002	4.06194	2.61867	2.68523
Peak_14745	AT5G61865	Chr5	24847306	24847920	9.21582	10.3802	6.25879	6.64758
Peak_14765	AT5G62200	Chr5	24984998	24985843	5.53553	5.82929	4.26999	3.74791
Peak_14786	AT5G62580	Chr5	25119763	25120847	8.18838	8.24808	5.08585	3.82986
Peak_14787	AT5G62600	Chr5	25131924	25132746	7.58507	7.1271	5.11921	5.40544
Peak_14788	AT5G62610	Chr5	25133746	25134867	8.19969	8.46528	6.08442	5.57529
Peak_14808	AT5G62890	Chr5	25243300	25244607	7.60458	7.60188	6.12869	5.59291
Peak_14887	AT5G64090	Chr5	25647874	25649308	11.6749	11.8029	7.21227	8.15455
Peak_14923	AT5G64560	Chr5	25808861	25809743	7.12035	7.12435	4.56193	3.62687
Peak_14926	AT5G64580	Chr5	25820892	25821657	7.12542	7.04239	5.12034	5.54781
Peak_14934	AT5G64710	Chr5	25869161	25870103	10.5443	10.6317	6.47371	6.60986
Peak_14955	AT5G65000	Chr5	25966726	25967527	8.26685	7.70437	4.58503	5.20039
Peak_14980	AT5G65410	Chr5	26136049	26137209	6.23105	5.97336	4.46683	4.27409
Peak_14990	AT5G65560	Chr5	26203057	26204741	9.10601	10.0112	7.38504	7.1397
Peak_14995	AT5G65630	Chr5	26226212	26228607	8.55354	8.85734	6.68946	6.44171
Peak_14997	AT5G65640	Chr5	26237002	26237972	7.403	8.02163	4.66645	5.48402
Peak_15017	AT5G65860	Chr5	26348165	26349199	7.90456	8.304	6.96912	7.19446
Peak_15035	AT5G66050	Chr5	26413521	26414674	9.5237	9.33284	8.16317	7.89781
Peak_15036	AT5G66052	Chr5	26416038	26416809	9.88952	9.93834	6.0875	6.57573
Peak_15039	AT5G66080	Chr5	26424579	26425114	4.66079	5.11126	2.62156	2.94678
Peak_15042	AT5G66120	Chr5	26432832	26434680	8.2117	9.15002	6.06179	6.57396
Peak_15061	AT5G66470	Chr5	26543520	26544479	8.05465	8.03502	6.18362	5.99468
Peak_15067	AT5G66558	Chr5	26564269	26566846	8.18315	9.19239	6.45752	6.15964
Peak_15074	AT5G66620	Chr5	26588434	26589403	3.95363	4.08477	3.10001	3.21901
Peak_15087	AT5G66770	Chr5	26660467	26662383	10.2558	10.1864	7.95974	6.6578
Peak_15097	AT5G66920	Chr5	26722963	26723826	3.47624	3.91384	1.93852	2.25342
Peak_15123	AT5G67320	Chr5	26856955	26857805	6.8926	7.17772	5.85733	6.16875
