# Supplementary material for: Diurnal regulation of SDG2 and JMJ14 by circadian clock oscillators orchestrates histone modification rhythms in Arabidopsis
Source: Genome Biol. 2019 Aug 20;20:170. doi: 10.1186/s13059-019-1777-1 (PMC6892391; doi:10.1186/s13059-019-1777-1)
Supplement: Supplementary file 3 — Table S2. List of all identified H3K4me3 and H3K9ac peaks with coverage levels at all time points. (XLSX 11750 kb) [file 13059_2019_1777_MOESM3_ESM.xlsx]

## Sheet: H3K4me3_peaks
Table S2 List of all identified H3K4me3 and H3K9ac peaks with coverage levels at all time points
Peak_ID	Chromosome	Start	Stop	ZT0	ZT0	ZT0	ZT3	ZT3	ZT3	ZT6	ZT6	ZT6	ZT9	ZT9	ZT9	ZT12	ZT12	ZT12	ZT15	ZT15	ZT15	ZT18	ZT18	ZT18	ZT21	ZT21	ZT21	ZT24	ZT24	ZT24
Peak_1	Chr1	3606	4247	2.16867	2.17636	2.2967	1.95104	1.94848	2.35302	2.87791	1.95104	1.94848	2.56298	2.76781	2.90607	2.691	2.6782	2.60907	2.61163	3.67932	2.33766	2.94704	2.8523	2.53481	2.53481	2.75501	3.37207	3.34134	2.46824	3.13139
Peak_2	Chr1	8006	8790	3.19754	3.26664	3.0719	5.17427	5.41926	6.38041	6.53118	6.44742	6.28409	4.4309	6.92066	5.68939	4.31992	4.37017	4.15868	4.63821	5.07795	5.58051	4.65914	4.47487	4.54816	4.91043	5.5114	5.0947	2.70963	3.31061	3.20382
Peak_3	Chr1	12037	13584	2.37861	2.26499	2.40409	2.43489	2.73965	2.01651	4.15195	3.78135	3.32368	2.62496	3.05821	3.18988	2.22039	2.76301	2.88088	2.78212	2.90743	3.14104	2.97857	2.30534	2.49117	2.87982	3.23236	2.7131	3.49783	2.99556	2.67487
Peak_4	Chr1	23036	24059	5.87687	6.04542	4.99397	5.4611	6.71962	7.07439	6.56392	6.59602	5.72436	6.23965	8.67965	6.69715	6.76939	7.64747	5.73078	5.32145	5.98121	5.23476	6.36005	7.04068	6.96523	7.91234	8.03594	8.18684	4.819	5.59434	6.05665
Peak_5	Chr1	32403	33203	3.55641	3.37582	3.36761	3.4538	4.83902	4.15154	4.72205	5.68041	4.79387	5.17968	6.25501	6.5259	4.53325	6.03748	3.04952	5.11401	5.12838	4.0674	5.07091	3.60156	4.72615	7.21954	7.41039	7.2811	3.34914	3.75547	2.51186
Peak_6	Chr1	35955	37913	8.91204	9.41633	8.75764	8.78617	14.122	13.7763	3.6895	4.11241	3.89424	1.19823	1.04216	0.599114	0.385145	0.252568	0.513526	0.941466	0.941466	0.898672	1.56995	1.92572	1.48772	5.27707	6.50467	6.10862	8.44885	10.4853	9.85014
Peak_7	Chr1	45908	46939	6.17377	5.7676	6.47799	7.96091	9.45019	9.35621	8.12338	9.14915	7.74906	7.50854	11.0637	9.32913	8.99465	9.9344	7.88763	8.29221	9.54098	7.36042	6.98132	7.20272	8.11063	9.08544	9.99972	9.9583	5.5892	6.98929	5.47133
Peak_8	Chr1	48422	49423	9.34105	10.0908	13.0191	10.2072	12.7435	11.933	10.8749	11.4983	9.68719	9.95624	11.8658	10.7552	7.96138	9.0113	10.5042	10.3303	12.23	9.49854	10.7929	10.6272	9.54283	12.7845	14.5677	12.8763	8.36658	11.2112	9.62157
Peak_9	Chr1	50439	51315	4.11041	5.45431	6.3821	6.3671	6.47769	6.02222	8.0765	6.92003	8.32765	5.63986	5.97911	6.62014	5.94163	5.31373	5.57613	5.09443	4.44404	3.70181	4.68395	4.2641	2.8115	5.20314	7.17682	6.88067	5.00821	6.26964	5.04382
Peak_10	Chr1	57464	59076	2.96249	2.89829	1.93015	2.75459	2.49473	2.33881	2.77294	2.52428	2.75459	2.92886	3.21726	2.91867	2.71791	3.19688	2.75459	3.85317	4.85697	5.13315	4.22514	2.96656	3.73292	3.62388	2.59867	2.94822	3.79406	3.31102	4.1059
Peak_11	Chr1	63496	63969	2.30269	2.12236	2.4206	2.41713	1.62298	1.41144	1.8692	0.756004	1.10973	1.25885	1.17215	1.00569	1.16869	1.59177	1.89001	2.16398	2.53504	1.51201	2.35124	2.64948	2.07728	2.11889	1.23804	2.65295	2.50383	2.09462	3.32225
Peak_12	Chr1	65830	67727	4.19608	5.38605	5.91608	7.65167	8.42506	8.59308	9.09454	8.82865	8.9984	4.9331	6.44264	4.90278	6.55697	7.29139	6.64011	7.3728	7.83528	6.8904	4.15191	4.66462	4.00641	4.54943	4.93743	4.9842	4.82744	3.46599	5.47698
Peak_13	Chr1	72292	73119	4.03403	3.35706	3.47419	6.49773	5.54679	5.56863	5.46738	5.56863	4.55615	4.92739	6.0173	5.22121	5.73142	6.65059	5.74532	4.84203	5.01475	4.97504	5.58848	3.59727	3.77198	6.27737	6.3409	5.85054	4.94725	3.19824	4.23653
Peak_14	Chr1	74069	74747	2.72351	3.27063	4.5997	2.91234	3.94848	4.34551	3.59745	4.78611	3.89522	2.39184	3.39894	3.89522	2.46931	3.50304	3.82501	3.70397	3.45946	4.3213	1.81567	2.72593	2.66056	2.67751	2.09892	2.19817	3.3481	3.64103	3.46672
Peak_15	Chr1	75538	76544	5.63492	6.41029	5.16969	6.08218	4.70447	4.84975	5.07828	5.49453	4.9232	7.43704	5.16153	6.5474	5.22682	6.13768	5.88466	7.12853	7.55294	6.37764	7.07629	7.46805	7.63945	5.68389	7.35053	5.96465	5.69204	6.90979	6.49353
Peak_16	Chr1	88833	89567	3.6141	3.29652	5.46364	4.00771	4.94478	3.05722	6.1301	5.23552	4.94031	4.43264	4.79494	3.18023	5.09686	4.07257	4.23136	4.001	2.83358	3.98311	3.77288	4.48855	2.97671	4.16203	6.02052	3.59844	3.18917	4.30069	3.10195
Peak_17	Chr1	91310	92286	6.8595	5.47649	5.11476	6.16968	7.79159	8.44607	8.43262	8.48478	7.74616	8.24754	11.2188	10.0932	9.53297	10.0562	11.0169	9.23685	9.04168	8.53189	8.12472	7.46519	6.54487	10.3641	9.92835	8.65471	6.09228	6.77874	6.38335
Peak_18	Chr1	96006	96515	1.99833	1.62445	1.48586	1.69858	2.13692	1.08297	3.2489	2.24329	3.27468	0.754209	1.76304	0.986273	1.96932	2.63006	2.94915	2.76543	1.8823	2.02412	3.28113	2.47535	2.34643	1.55999	1.31181	1.08619	1.46329	1.34082	1.83073
Peak_19	Chr1	97343	98254	6.25072	6.21287	7.26187	6.17502	6.71033	6.86714	7.71968	8.88764	8.80472	8.38115	10.3602	9.43556	8.52716	10.4972	8.93449	7.27088	7.53403	7.33216	7.35379	6.71394	8.51093	10.4125	9.81046	9.37428	5.35673	6.07048	5.0377
Peak_20	Chr1	99890	100889	2.57582	2.012	2.34733	3.2695	4.20974	3.77578	6.38941	5.46231	7.04199	6.37132	3.60483	3.66072	4.60425	3.68702	4.44316	2.79609	2.17638	2.8717	2.68266	5.0267	5.81572	3.18566	3.34347	3.8251	1.31996	2.94567	1.84433
Peak_21	Chr1	108962	110210	4.6313	5.36304	5.50386	5.31435	7.40297	5.77366	6.09742	7.52274	6.49882	6.2106	5.92764	5.62099	6.93181	6.39353	6.08688	5.9487	5.46438	5.15773	6.44091	6.37379	6.44354	6.01056	7.05816	7.58591	4.16145	5.83683	4.69973
Peak_22	Chr1	114181	114911	2.80411	3.01998	4.0184	3.39776	4.22078	4.24327	4.38719	5.01232	4.68851	2.73665	3.15715	3.62488	3.29657	3.65186	2.78162	3.20213	4.01615	2.89856	2.70742	3.73506	4.25001	5.30015	2.56125	3.47872	2.17897	4.37144	3.66985
Peak_23	Chr1	116956	118563	7.49723	7.12104	6.75507	6.90534	7.96542	7.29891	7.81822	6.9677	8.17089	10.1275	10.2185	9.79321	8.90692	10.106	9.47529	10.6969	12.4879	11.117	10.8441	10.1735	10.6356	8.03085	8.65852	7.64239	7.40318	8.49598	8.23734
Peak_24	Chr1	129195	130686	5.24206	7.4907	7.85758	7.61409	9.57077	9.00668	10.0522	10.9865	11.295	7.20975	7.47306	6.89135	6.68313	8.40623	7.36179	7.47858	7.43781	6.72279	5.77088	6.63244	6.55532	6.42532	7.48629	6.68643	4.55126	5.28172	4.8884
Peak_25	Chr1	135977	136742	4.67815	3.65239	3.4335	5.14381	5.94639	6.57515	4.48716	4.48716	4.37771	3.77685	5.80047	5.39059	4.68888	4.38844	4.30904	3.28329	3.61161	3.85411	4.24466	6.31978	4.54509	5.9979	5.70176	6.24039	4.52149	4.14381	3.72105
Peak_26	Chr1	141929	142977	8.00583	7.67206	8.71098	8.81911	9.14347	8.46182	8.41169	8.83791	7.4229	6.60806	9.15601	9.10743	7.73004	8.5104	9.66999	7.34926	8.07791	7.32262	8.84887	7.64228	7.56393	10.2294	11.8607	9.413	6.20377	8.57779	7.32575
Peak_27	Chr1	143673	144146	1.98018	1.24845	0.492443	2.90958	1.34555	2.12236	2.95813	1.95937	2.78126	3.11765	0.998757	1.9455	1.41491	0.87738	1.82412	1.82065	3.08644	2.11196	2.82288	2.29922	1.73049	1.82065	1.33861	1.8692	2.16744	1.08199	1.13054
Peak_28	Chr1	149344	149719	2.24709	1.07546	0.900586	2.61432	1.1148	1.023	1.73122	1.89735	1.08857	2.26021	1.33776	2.61869	1.56073	1.05797	1.1148	2.89849	2.22961	2.89849	2.62307	2.26458	1.94981	2.27333	2.56186	1.46892	4.37615	0.891843	3.8253
Peak_29	Chr1	154706	156099	4.08943	4.95259	5.43016	4.01514	5.00683	4.83231	4.64482	6.30984	5.95018	6.67892	4.39012	5.40068	4.55403	4.29224	4.86533	5.27215	6.22494	5.41012	4.23446	5.58699	5.8134	5.6318	5.2922	5.11178	4.7875	4.90189	4.96792
Peak_30	Chr1	157038	158744	5.35315	5.81056	5.99449	6.57227	6.45478	6.91123	7.79235	7.96761	7.03064	7.9416	8.14768	8.00516	8.58198	7.47264	8.31331	7.48035	8.72354	8.68021	5.96848	7.54005	7.56508	7.90309	7.68931	7.5699	6.41434	6.18419	5.62855
Peak_31	Chr1	161865	162817	5.1901	4.16036	4.04134	7.08571	7.59972	7.7653	6.43027	6.87183	5.36603	5.51954	6.48373	7.44103	6.26813	7.98608	5.81621	5.7179	4.38114	5.27806	5.23321	6.02837	5.26426	6.77351	8.38108	7.42206	3.79296	5.10385	3.2548
Peak_32	Chr1	163295	163859	3.58724	3.56106	2.83372	3.27303	4.43677	2.6417	4.11384	4.67243	4.55897	2.97046	3.47959	3.35158	4.27094	3.19157	3.92763	4.69571	2.86281	3.90145	3.96837	3.2643	3.36031	2.96755	3.39813	4.1633	4.45132	3.40104	2.45841
Peak_33	Chr1	172231	172810	2.32398	2.16527	1.98388	1.53326	2.67541	2.82278	1.02028	2.58188	1.4454	3.7382	1.72881	1.73731	1.60978	2.90214	2.35515	2.26446	2.5422	2.04623	3.03534	1.30086	1.4369	1.97821	0.9636	1.35754	2.48552	1.45107	3.02117
Peak_34	Chr1	180704	182378	7.78518	7.58793	8.84702	8.82052	10.8323	10.0109	8.40835	11.1925	9.42602	6.36121	10.4604	9.09137	9.06783	9.28961	8.88627	8.76458	8.99128	8.73612	9.05016	6.71843	6.63698	9.62622	11.0983	9.05703	6.31116	9.97559	7.40342
Peak_35	Chr1	185031	186315	5.49038	7.13417	7.2186	6.95124	5.02347	5.84728	10.7838	10.9603	10.8017	12.787	9.02484	10.7185	11.7726	13.7848	10.6136	10.1058	10.7441	11.3364	7.38617	10.9552	12.338	8.76005	7.65225	8.82529	6.30652	5.21151	5.73343
Peak_36	Chr1	187048	188172	8.11959	9.21106	10.3873	7.89457	11.7914	11.1339	12.0501	13.5624	12.0267	10.9703	13.9495	12.0194	12.9604	13.387	13.387	9.53836	12.5775	9.97963	8.94221	11.5138	10.9615	13.6354	14.1921	12.9721	8.78879	9.43023	8.94659
Peak_37	Chr1	190488	191442	2.56466	5.63363	11.0435	6.53212	3.81944	4.73858	4.60089	5.25496	4.1	1.87271	0.306381	0.45613	0.351134	0.438917	0.78833	0.979388	0.790051	0.934636	1.28749	1.27372	1.75567	0.526701	0.526701	0.790051	1.78149	1.49232	2.64211
Peak_38	Chr1	195666	197134	11.8008	12.4107	13.9929	11.8814	14.7471	13.1279	13.7568	12.2775	12.5505	11.7762	16.3629	14.5054	12.1522	15.3312	12.2137	12.8381	13.9168	13.1928	11.4528	12.3189	13.0697	15.8314	17.9799	15.7878	12.0369	13.3439	10.4424
Peak_39	Chr1	199734	201039	5.95213	6.30329	7.07484	7.40083	7.93197	8.93888	7.33538	8.56381	8.31711	5.32532	4.68593	5.84136	6.2391	5.17806	7.13021	5.15666	5.59719	5.85899	5.67522	6.38761	5.18561	6.34986	7.03582	5.72054	4.58146	7.19441	6.09813
Peak_40	Chr1	204966	205890	1.54072	1.45009	2.1236	2.62295	2.0845	2.42747	2.71892	2.05074	2.44702	4.73766	1.81261	3.15074	2.35462	2.82198	2.83087	4.89405	3.51682	4.30762	3.2698	3.36754	4.21876	1.63135	1.94589	1.47852	2.80954	1.94944	2.36883
Peak_41	Chr1	220306	220916	2.02582	1.35323	0.686033	3.73148	1.93165	0.930852	2.87865	2.06617	2.60692	2.15764	2.1953	1.92089	1.51734	1.71374	1.85901	1.90744	3.0858	2.27063	3.09925	4.46863	2.34865	1.5846	1.37207	1.23486	2.90017	1.09765	2.78179
Peak_42	Chr1	223342	224378	3.23368	2.91824	3.52852	2.98323	3.77738	3.81543	2.5172	3.26697	2.75338	3.5412	4.44631	3.15284	3.30501	3.83286	3.87249	4.72847	4.4051	4.70469	5.48141	3.63789	3.1354	5.49726	4.9599	4.27195	4.03259	3.4667	4.0104
Peak_43	Chr1	225867	227395	7.58465	9.20156	11.2367	9.91649	12.1258	10.4551	9.18006	10.0057	8.99622	11.385	10.6368	8.93924	10.7647	14.6554	11.7	9.86918	12.9106	10.4809	9.01342	10.44	10.0939	9.29617	10.8077	9.52086	12.1526	10.8819	13.5782
Peak_44	Chr1	229002	230000	2.90584	2.85318	2.51751	3.09013	3.32048	3.67919	3.3501	3.66274	3.00456	4.11687	3.63641	3.39453	4.20079	4.42951	4.45254	3.28429	3.88323	2.80876	3.4406	3.17898	3.18885	2.99469	2.76927	3.39947	3.16252	3.69235	3.03747
Peak_45	Chr1	236897	237837	7.44334	7.32281	7.32281	9.56227	10.6575	10.1335	9.70552	8.70282	9.98151	5.81876	7.15161	8.2137	7.39792	8.54211	7.3525	6.88959	9.28977	8.75173	8.12636	5.52355	4.92263	7.42762	8.25563	7.65646	6.16115	6.41445	6.37252
Peak_46	Chr1	249079	249857	2.12912	1.39901	1.64168	3.04702	3.03858	1.93921	3.1884	3.12088	3.08078	2.83601	2.03627	3.25592	2.69041	2.95418	3.5218	3.16097	2.25995	3.09978	3.83832	3.51336	3.63364	2.55114	3.65896	2.54903	1.84636	2.30004	2.04471
Peak_47	Chr1	258763	259322	2.38056	2.69464	2.68583	3.37564	3.41086	3.79832	2.11638	2.43633	2.79737	1.94613	2.73573	4.19166	2.51558	1.49702	3.53121	1.79643	3.45783	2.54494	3.5224	2.57429	3.44315	2.11344	3.02927	2.46275	2.2015	2.11051	1.91971
Peak_48	Chr1	262761	263556	4.52868	4.24783	4.52868	6.49255	5.82347	5.98867	6.12291	7.4239	5.17504	4.52042	5.68511	5.46621	5.91434	5.97009	5.06972	4.81779	5.76565	5.69957	5.3134	4.08675	5.52197	5.64381	6.70732	5.51784	2.63295	3.428	4.32011
Peak_49	Chr1	266449	266910	2.38385	0.98912	1.02114	0.957098	2.92466	2.72186	3.08477	4.78193	3.28758	2.39808	2.25576	1.89285	2.96024	2.13479	2.82504	3.13814	2.67205	3.07054	3.64337	2.19883	3.34095	3.32316	2.72897	1.81101	2.59377	1.91064	2.71118
Peak_50	Chr1	268258	269832	9.39099	10.8041	11.327	10.3898	10.132	9.82098	11.3228	13.023	11.9981	9.98379	9.43795	10.1299	8.53831	11.9104	9.13424	12.8435	13.0501	13.5323	9.74062	8.58631	8.93907	10.0162	10.7519	9.52771	12.5116	9.13425	12.0889
Peak_51	Chr1	270803	271607	4.53931	3.13239	3.34067	3.31004	4.16562	2.81792	4.2616	6.48939	5.24991	4.07373	5.01713	5.73794	4.86194	4.89665	5.18048	4.37391	5.1131	4.04719	3.91242	4.33715	4.29018	4.72717	5.18457	4.6169	4.89461	5.15598	4.84764
Peak_52	Chr1	274068	274687	2.23767	1.62258	1.62258	1.9699	2.09981	1.28321	1.92482	1.74984	1.78961	2.11041	2.24828	2.21116	2.02822	2.83686	3.08343	2.40736	2.97473	1.75514	1.9805	2.2854	1.4635	1.21693	2.84216	3.03571	2.4975	1.28852	1.75779
Peak_53	Chr1	277923	279601	5.3827	4.79332	3.89458	5.63333	5.04297	4.54367	7.09796	6.85124	6.43417	6.77096	6.87473	8.05348	7.34271	8.13278	8.1132	7.73922	5.83012	7.02845	6.53893	7.64229	6.31179	6.25991	6.8532	6.64173	5.68326	5.03416	5.04297
Peak_54	Chr1	284387	285298	6.11915	5.19452	5.69919	5.90106	7.27088	7.56106	6.79325	7.69264	6.6887	4.56187	8.44784	6.25252	5.90827	6.43456	7.27989	6.7608	7.808	6.62923	6.3841	5.16748	5.38016	8.00626	8.38837	8.26761	5.42342	5.45046	4.96381
Peak_55	Chr1	293279	294313	8.18718	6.49575	6.88009	7.27396	9.53556	8.65569	7.27555	9.96756	8.06647	7.97118	9.00827	8.66522	8.88281	8.58581	8.68746	8.26659	7.62813	8.25389	8.22529	7.02302	6.45286	10.1867	9.70391	10.2868	6.88485	9.08451	8.68428
Peak_56	Chr1	297455	298204	4.38782	3.35333	3.12977	2.12378	4.1533	4.69685	5.92641	4.024	5.97462	5.10013	5.01027	4.90725	4.43166	3.4651	4.28042	4.53247	4.22125	5.00589	5.09355	6.27708	3.75879	7.04199	6.17845	6.75269	3.10566	4.35275	2.86238
Peak_57	Chr1	298612	300762	4.83279	3.9616	3.70254	4.1901	4.74337	4.72274	5.2508	5.87057	5.30735	5.29971	5.16597	4.38114	4.16641	5.12318	5.22252	5.49534	5.32799	5.14458	4.40407	4.64173	5.57329	4.20538	4.55462	4.33988	4.0235	4.92984	3.93638
Peak_58	Chr1	301528	302220	1.64142	1.33069	1.45166	2.98159	1.81457	2.23204	1.6936	1.08874	1.57263	1.63667	1.52282	1.80983	1.24292	0.972515	0.941679	1.27376	1.7529	1.93554	1.07688	1.6936	0.85866	2.17749	0.626205	1.70783	1.45166	1.68411	0.747176
Peak_59	Chr1	303475	304129	3.52599	2.81577	3.19974	3.70919	3.7117	3.08932	5.32286	4.39682	5.98038	3.96768	4.00783	3.30514	3.9476	4.59508	4.13833	5.49854	6.30914	6.67303	4.05049	3.50591	3.6339	2.55979	3.19723	2.34648	4.19354	3.83969	3.48332
Peak_60	Chr1	305596	306402	5.0271	6.12296	7.16179	7.4164	6.93161	7.90933	5.80317	10.4331	8.23523	8.81575	8.89112	6.88069	7.26771	9.15999	9.21703	6.17388	7.37363	5.44671	7.02327	6.44071	7.46936	8.65892	8.75465	8.31672	5.74409	6.91736	6.96013
Peak_61	Chr1	308530	309090	1.65551	0.896612	2.21223	1.34785	1.83424	3.38427	2.77481	1.69653	1.94852	1.79322	1.79322	2.49059	1.78443	2.12432	1.92801	2.33529	2.03642	1.94266	1.90164	2.03642	1.04605	1.19548	3.30809	2.71328	3.24069	1.49435	3.35497
Peak_62	Chr1	315175	316777	5.33437	5.33437	6.1014	5.31283	5.21541	5.30257	5.97527	5.82658	6.31879	5.87785	8.59938	7.57188	7.44678	7.19965	6.41005	6.05013	5.8235	5.59586	5.58047	6.1137	5.30975	7.79954	7.38936	7.55241	4.45658	4.75909	5.33026
Peak_63	Chr1	321927	323547	4.33916	5.05812	4.91109	4.66771	5.46172	4.59571	5.59659	6.27195	5.24167	5.79331	7.25457	7.35192	5.84706	5.63106	6.13099	5.12708	6.25776	5.12505	5.0997	5.44042	5.99917	5.73247	6.48085	5.51039	3.77534	5.11998	4.79244
Peak_64	Chr1	325247	326195	6.44871	8.6156	8.79055	7.74261	10.4724	10.0013	9.80211	9.87832	9.62369	7.33209	8.49608	8.41813	7.80843	8.30208	8.32287	9.21492	7.98857	8.36098	5.31243	6.04685	5.38864	8.30382	9.2842	7.67159	6.94063	7.76166	7.14502
Peak_65	Chr1	336397	337923	7.42235	9.57531	9.76047	8.19742	9.9919	9.40737	9.22223	11.2751	9.5527	10.092	11.3052	11.6152	10.8036	11.6777	11.6432	10.8628	9.88857	11.3224	9.2459	10.6539	11.7821	10.7325	13.6412	12.4937	7.79696	9.79384	9.14579
Peak_66	Chr1	338197	338873	4.82939	3.2293	3.53281	4.52588	5.46796	4.77597	4.37292	3.75862	3.21231	4.76626	4.93379	4.64971	4.82939	4.0864	5.57237	3.60565	5.09162	4.90951	3.25358	3.88973	4.29036	5.38298	4.43362	6.73298	3.80718	4.09369	4.81967
Peak_67	Chr1	343344	344466	8.91715	6.6703	6.51368	7.87496	6.94255	7.58075	7.39046	9.25674	7.76371	7.78128	8.65074	8.6888	8.58927	9.18208	8.09745	9.22893	8.96253	9.01961	9.53777	8.12965	8.30676	10.6751	10.3282	10.6678	7.42998	7.76372	7.61441
Peak_68	Chr1	345628	347051	6.84527	8.09774	8.40364	8.65644	8.34245	8.32052	6.85104	8.20163	7.82992	9.48526	9.86042	10.067	9.39869	10.7608	9.24284	10.8255	10.3175	10.4226	9.11471	8.24203	8.83074	8.94272	9.85812	9.30172	7.67755	6.82911	7.24121
Peak_69	Chr1	347722	348515	5.39511	3.40558	2.6106	3.48425	4.18193	4.22333	5.76361	5.35577	5.86919	4.24197	4.03287	4.09291	5.54002	3.52566	3.99561	4.66844	3.95627	4.8527	3.48425	5.68908	5.27917	4.97277	6.15696	3.9894	3.77823	4.47384	3.89623
Peak_70	Chr1	353672	354956	9.79238	8.61934	9.4649	8.6526	9.32418	8.08974	9.79238	10.1122	10.3412	12.5401	13.7247	11.0729	10.9104	12.3227	10.9731	12.1883	14.3541	12.0591	9.80644	9.65549	9.96634	11.8967	11.9875	12.1564	9.61712	10.0431	10.5689
Peak_71	Chr1	362253	363229	7.16571	5.93581	6.60712	6.03508	6.31773	7.46855	6.23193	7.80842	6.94362	7.81514	8.70686	10.3641	8.12304	10.4533	8.24249	8.13819	9.09552	7.551	6.69461	6.25716	6.41532	8.78594	8.29466	8.19875	7.7327	7.87235	7.20777
Peak_72	Chr1	373374	374470	7.58211	7.38881	7.2045	6.37586	9.47163	8.56358	7.34985	9.09254	7.7724	6.73249	10.4591	8.23242	7.53865	8.16799	9.124	8.76887	6.96625	7.75593	8.53361	7.02918	9.00862	10.552	11.003	9.44017	6.19005	7.82336	7.18352
Peak_73	Chr1	388814	390618	5.24829	6.15351	7.5505	7.86287	10.0795	10.3982	7.70987	8.90833	9.28899	6.50685	9.18518	7.38566	8.65972	9.45838	8.59323	7.49677	6.67169	6.7582	6.96675	6.87295	6.18265	8.26721	10.2962	9.11961	5.56611	5.96409	5.76919
Peak_74	Chr1	392809	394001	6.02539	3.30273	2.7695	5.46873	5.32681	4.65855	4.01371	4.71229	4.36782	5.36126	4.92447	4.91621	5.43429	4.54005	4.95479	6.97336	5.64648	6.02677	5.17249	3.82356	4.02886	5.49629	4.63788	4.88865	5.0099	4.91897	5.06915
Peak_75	Chr1	394078	395386	1.53705	1.9615	2.17749	2.69863	1.70532	1.72039	2.42362	2.70239	3.06656	2.07577	1.94015	1.79322	2.5517	2.07451	2.24404	3.08917	1.93764	2.97741	1.57472	3.59398	2.40478	2.88197	2.75639	2.82044	1.69025	1.66639	1.60109
Peak_76	Chr1	395569	396782	6.21092	5.83044	5.83044	6.43298	9.66775	7.37132	7.63807	7.66244	5.78846	7.77888	9.09499	8.86075	7.58797	6.59817	7.52568	7.12218	5.96855	7.19801	5.21029	6.36799	7.08833	7.88856	8.95418	7.39705	6.95292	6.83648	7.04364
Peak_77	Chr1	401237	401973	4.77747	4.2288	4.89791	6.22945	7.19297	6.8428	5.2057	7.00562	4.93136	7.27103	7.42046	7.871	6.13354	6.59745	5.34398	5.45105	5.35068	6.09562	5.10533	5.62724	4.7507	5.11872	7.07699	6.13577	4.0972	5.00497	4.32247
Peak_78	Chr1	403748	405369	6.46064	7.0464	8.54932	6.96938	8.06287	8.73275	8.25137	8.35272	8.68613	8.47635	9.31142	8.44493	7.8004	8.91415	8.83207	8.12672	8.23719	7.98586	7.56223	6.79304	7.07477	10.3259	9.96205	9.91037	5.8323	7.54602	5.29012
Peak_79	Chr1	408629	409755	7.57572	7.49404	8.58067	7.40216	7.45612	8.04537	9.24431	10.1909	10.8954	9.10428	9.65415	10.732	10.1428	11.4146	9.19033	8.78632	8.67693	9.59582	7.66031	9.39016	9.33036	9.6702	9.88461	8.604	7.74491	7.26068	8.19123
Peak_80	Chr1	410656	411341	4.10468	3.48407	2.62862	3.28279	5.45613	4.88823	3.03837	3.42416	3.89142	2.74364	4.8427	4.62705	3.23965	4.74446	4.35388	2.78677	3.64221	5.06795	5.19015	3.67097	4.53599	4.37545	3.66618	4.10708	3.50084	4.17417	5.09191
Peak_81	Chr1	411680	412741	8.25609	7.73602	9.07489	7.35371	9.34111	8.36598	7.52397	9.58103	7.25	7.72054	9.51137	8.25454	9.55162	9.51292	9.75128	9.3566	9.06096	8.33039	7.77162	7.22059	8.13071	8.24216	8.56256	10.7373	8.13071	8.60435	7.97284
Peak_82	Chr1	414241	414581	1.94748	1.96676	1.40276	4.22757	3.65875	2.72358	1.72092	3.07548	2.28009	1.12317	0.993021	1.47507	1.3642	1.89445	2.73804	3.22009	1.83661	1.74502	2.02943	1.67753	2.32348	1.72092	1.83661	0.983381	2.53076	2.34276	3.3406
Peak_83	Chr1	418925	419996	1.79406	1.64226	2.50248	1.63306	2.20194	1.74192	2.58069	2.60982	2.45341	2.8981	1.61925	1.55332	3.79513	2.8935	3.59425	3.9776	3.64179	3.57739	1.61772	2.79229	2.18201	2.12221	1.32944	2.13141	1.74192	1.28038	1.77106
Peak_84	Chr1	429940	430722	2.19592	2.67037	1.606	4.80121	2.03427	3.03355	2.35337	2.14133	2.78163	2.99577	0.749466	1.99228	1.49264	1.58081	1.46324	3.30647	2.99157	3.5332	3.08604	4.75712	3.82081	1.9272	2.35547	1.98808	3.27078	1.59131	2.32398
Peak_85	Chr1	436107	436926	1.22683	0.904084	0.703622	2.37748	0.441016	1.00431	1.01233	0.920121	1.11457	3.29559	0.92012	2.14695	1.81017	0.817885	1.43932	2.69822	3.50007	2.93276	3.52212	2.65813	4.12952	1.31704	1.26692	1.20478	2.76036	1.32906	2.72628
Peak_86	Chr1	442137	442981	2.66897	2.17291	1.48816	3.75056	3.43153	2.73122	3.07554	2.85377	2.7779	2.40829	2.08343	2.28185	4.19798	3.35372	2.48027	2.97633	3.32648	2.74484	2.96271	3.37511	2.39273	3.5288	4.76212	3.9412	2.97633	2.44331	2.97633
Peak_87	Chr1	445154	446385	4.47372	5.08614	5.84666	6.32832	7.44241	6.99811	8.57385	9.10889	9.05017	7.15154	6.19222	7.5278	6.27362	6.83666	6.74727	5.78395	6.19223	6.63653	4.71522	7.04347	7.23293	5.9534	6.79797	7.6212	4.55911	4.87266	3.67451
Peak_88	Chr1	449722	450547	5.6458	6.96521	6.6866	6.85376	8.15526	6.6249	7.55426	7.48262	7.5264	7.84282	8.22491	8.79208	5.8249	10.1354	6.18311	5.94431	6.74431	7.19008	6.43585	6.15923	6.68261	7.05476	5.88262	6.08958	6.22291	5.98411	4.10748
Peak_89	Chr1	452124	452906	4.73193	5.41002	4.98175	6.36732	6.29384	5.68083	6.15949	8.28402	7.16297	6.0986	6.37571	7.78437	6.91735	8.0216	7.61643	7.18397	6.18258	6.80189	5.40372	6.70531	4.70044	7.3876	8.12028	6.21617	3.8544	3.10493	3.64027
Peak_90	Chr1	453163	454135	1.32449	1.29239	0.717996	0.687587	2.67094	2.03404	3.05613	4.38738	3.10174	3.84339	3.54943	3.56295	6.07678	5.90446	5.13409	3.58153	3.99713	4.23533	2.11682	4.55463	5.68315	2.1844	3.10343	2.62026	2.06783	2.03235	1.29239
Peak_91	Chr1	455629	456467	4.19666	4.29462	4.73544	4.97055	7.52929	6.06967	6.3087	7.18252	6.76715	5.62101	7.19231	5.56223	6.80634	6.52813	5.97367	4.41413	7.29615	3.90865	4.70997	6.9572	5.75032	5.92469	9.46501	7.04929	4.19665	4.59634	5.29382
Peak_92	Chr1	462844	463705	6.53892	8.51261	7.74411	8.22276	7.74983	8.25136	7.09957	8.67089	7.09956	7.45807	8.00917	7.56295	7.79751	8.1808	6.77347	6.4226	6.98134	5.81047	8.35815	6.13846	7.45425	8.89591	9.68729	8.07211	7.60872	8.16936	8.16173
Peak_93	Chr1	466649	467648	1.34133	1.74899	2.2487	1.7605	1.25092	2.17966	2.32432	2.515	2.93416	2.24048	1.36106	2.17966	1.50242	2.8043	2.67937	2.17145	1.96597	2.09583	1.80488	2.44596	2.59883	1.39393	1.5616	1.509	1.41037	2.01035	1.2575
Peak_94	Chr1	469717	471582	3.64259	3.0048	3.57211	3.89629	5.11459	4.20285	4.38696	3.96941	4.13325	5.99022	5.65459	4.82125	3.63906	4.44774	4.38608	3.97645	4.51381	5.23881	4.97981	5.2758	5.04236	4.93225	5.14102	4.38872	4.31296	5.16657	4.4266
Peak_95	Chr1	474348	475181	4.70471	4.41891	3.92026	5.13438	5.03582	3.24619	6.63034	4.2908	6.01343	4.35387	6.23417	6.9043	5.89911	6.47463	5.32753	5.01809	5.19745	5.81042	5.07919	5.07919	4.92545	4.97079	6.04299	4.91757	5.18956	6.05876	4.42285
Peak_96	Chr1	476963	477900	2.95286	2.42187	2.8004	3.16315	2.74432	3.6661	3.14563	2.63742	3.13687	1.52637	3.21923	2.23786	1.93469	1.51936	2.37981	2.16076	2.37456	1.87686	3.63631	3.82908	2.57083	1.96624	2.84947	1.71213	1.47205	1.97325	2.93884
Peak_97	Chr1	480985	481701	1.19444	1.28614	1.75383	1.87076	1.73091	2.1046	2.91847	2.40493	2.16421	0.818455	1.23112	1.40307	2.1665	1.8868	1.98768	3.32197	4.27569	3.74151	1.53833	1.40307	1.94412	1.16922	1.44433	1.90056	2.92305	1.28614	2.68921
Peak_98	Chr1	486996	487507	2.54595	3.09816	3.22016	2.35974	3.79484	3.94252	2.85416	3.09495	2.01621	1.39658	0.642105	1.31952	0.982421	0.98242	1.14616	0.950315	0.542579	0.622842	2.18958	1.49931	0.654947	1.8011	0.97921	1.8011	1.14616	0.654947	2.18637
Peak_99	Chr1	490827	491683	4.96589	5.3802	5.47802	6.06495	8.47596	6.31813	8.18442	8.03289	8.02521	5.74654	6.35649	5.6679	5.61804	6.24524	5.70435	4.93328	5.64489	5.94411	5.01959	6.03042	5.47801	6.95302	7.56296	6.52912	6.35841	4.55734	4.89108
Peak_100	Chr1	493443	494302	5.12251	4.12094	4.10565	7.41043	6.86377	6.64014	8.20557	5.72268	6.93258	7.36837	7.56525	7.32632	5.97498	8.77706	6.94596	6.6325	7.66656	6.72616	7.58054	8.68723	5.93102	7.74874	5.60417	5.83354	4.65421	4.32737	3.9298
Peak_101	Chr1	514279	515460	8.44424	8.80581	7.87266	8.18001	10.3481	9.45108	10.4037	7.53751	9.47055	7.78226	11.1769	11.3452	10.426	10.7208	8.94488	9.45387	9.75982	9.8377	8.33993	10.0254	8.28569	9.56513	10.7973	9.46083	5.95769	8.86561	7.58896
Peak_102	Chr1	518162	519149	5.47375	5.70834	5.53864	7.02271	8.34206	7.06762	6.52691	6.55186	6.75983	6.02112	8.56167	6.74319	7.2939	6.86298	7.3854	4.83653	5.29407	6.1143	6.41543	5.27909	5.25413	7.90782	7.48856	9.07578	4.58198	6.14591	3.93977
Peak_103	Chr1	537745	538736	7.69532	8.52384	8.4559	7.77486	11.0541	10.4758	12.1064	12.3748	12.6814	8.96958	10.8719	10.2223	6.41939	8.8801	8.48407	7.81628	7.83451	6.95462	8.00849	6.39122	6.55527	7.91073	8.95467	7.92399	4.73252	9.01598	7.10375
Peak_104	Chr1	555117	556058	3.85296	2.51803	2.77629	3.49523	2.98744	3.48302	4.31538	3.85121	4.74116	3.62611	4.56142	5.31003	2.80072	3.56154	3.29281	2.22487	2.49011	2.85482	4.81619	4.25081	3.89832	2.8775	3.68195	3.05026	3.38181	4.10424	5.08841
Peak_105	Chr1	568612	570036	2.66121	2.77887	3.05918	4.19541	2.05906	3.76514	4.88407	4.76526	4.22079	4.95559	2.70619	3.76514	4.00046	4.43419	4.11812	4.23578	4.58992	3.82397	5.64771	4.62683	5.14131	2.2194	2.29669	2.51702	3.64286	3.78591	3.58865
Peak_106	Chr1	573531	574982	4.84759	3.85022	4.68344	6.76761	7.50233	6.95553	8.20083	10.5635	8.78272	6.51289	5.46571	6.23553	7.0212	5.92873	6.36911	6.25591	6.62836	6.2944	4.58042	3.92607	4.31777	5.85741	4.36872	5.47024	5.31174	3.29211	4.38796
Peak_107	Chr1	580540	581262	5.60434	5.88854	5.25194	5.03822	7.72558	5.74757	7.06397	5.44974	6.60016	6.11362	9.36027	7.42092	6.50013	6.50012	7.8006	6.34325	6.78432	5.42928	7.79151	6.4933	5.31332	7.55279	5.67937	8.11663	3.43763	6.05678	5.05414
Peak_108	Chr1	584304	584747	1.74005	1.75856	1.26616	2.97659	2.50641	1.76596	2.36202	2.59156	2.60637	1.64749	1.03662	1.06994	0.995899	1.69192	1.11437	2.38423	2.24725	2.48419	1.69932	3.11357	2.38053	1.86592	1.02181	2.51381	2.00661	1.44017	1.79928
Peak_109	Chr1	591809	593176	7.52923	5.81214	6.0849	7.72148	6.59318	6.95365	9.45419	6.55713	8.91226	8.44484	7.8873	9.15258	8.46768	9.07328	7.97862	7.74311	9.62842	7.51961	8.21654	8.17328	9.06967	7.35379	7.10867	7.29371	7.18677	7.81761	8.565
Peak_110	Chr1	601504	602285	3.12572	3.96443	6.11481	6.2094	5.54726	4.60975	4.60976	5.98659	6.1106	4.11998	5.36018	5.8962	5.4779	5.92562	5.26138	5.00073	4.45631	5.49681	5.25297	6.39648	5.51152	5.68389	6.02232	6.86734	5.33495	4.57823	4.71696
Peak_111	Chr1	602403	603329	6.94576	6.14071	5.9563	6.55565	9.02576	7.85011	7.7579	7.87848	9.16762	5.85344	8.6392	8.06999	8.1427	5.64066	8.22958	6.96172	6.6319	6.66914	6.35172	7.11244	7.03797	8.32002	9.00449	7.87139	5.38176	7.30218	3.97914
Peak_112	Chr1	608674	609573	6.86738	8.07283	9.19061	9.06276	8.99517	9.09928	9.18147	10.0088	9.35315	6.13863	9.21434	8.17145	6.52949	8.23538	8.30478	6.74136	7.85548	8.82349	5.76239	7.16144	5.85736	9.57233	9.03171	9.63991	7.72032	9.39882	7.19248
Peak_113	Chr1	621414	622505	8.81354	8.7187	7.63037	8.2927	10.2225	10.5431	9.23653	11.4854	9.56769	8.21894	10.4769	7.68155	8.13164	9.02277	9.1733	8.2912	9.25911	7.62736	7.98411	7.52048	7.04029	10.7539	11.6315	10.5582	7.43618	8.6028	6.85664
Peak_114	Chr1	623975	624545	1.07955	2.62834	3.78273	4.39879	2.185	2.69455	3.94682	3.53515	3.58121	2.91621	0.293636	1.94318	0.555606	1.24076	0.935606	2.09864	0.984546	1.71864	2.15045	2.39803	2.28576	1.01333	0.440455	1.01333	1.60636	2.19076	1.35015
Peak_115	Chr1	626638	627504	5.73146	7.12498	6.09169	6.90695	7.53829	7.00174	6.30403	8.21894	7.87956	5.49256	6.76095	7.70324	7.2103	7.18944	7.26338	4.69816	4.96549	5.64424	5.6139	3.92651	5.31814	7.36008	9.35841	8.37062	5.23282	5.02806	5.98362
Peak_116	Chr1	630631	631142	1.47363	1.87816	0.773737	0.959947	0.789789	1.05305	1.82358	0.982421	1.65021	2.379	2.90552	2.80279	2.61337	3.03073	1.4961	2.35974	3.73063	3.46737	1.51858	1.49289	1.01453	2.32442	2.11253	1.8011	2.49137	2.47853	2.65831
Peak_117	Chr1	635306	636301	3.1704	2.64228	2.7545	2.77761	3.88667	3.50048	4.71021	3.78765	4.20849	5.62783	4.11277	4.0319	3.70018	4.09627	5.05019	2.97565	4.27781	3.47242	3.74473	3.6127	3.47572	3.92298	4.27121	3.85861	3.22156	3.23972	4.07811
Peak_118	Chr1	637961	638741	4.1442	4.723	6.74353	7.94744	5.69959	6.58567	6.02372	6.45308	6.22366	6.47833	8.95138	7.76853	6.03424	7.52017	6.11422	7.30549	6.84456	6.74774	6.89296	4.7251	7.80852	6.92664	6.99189	6.08265	5.04502	6.33311	5.87007
Peak_119	Chr1	641405	642081	2.78254	2.50089	2.74855	3.54981	3.57651	4.21023	3.46725	4.54774	3.8873	4.73955	4.51374	4.36563	5.20088	5.52623	5.54809	3.87274	3.61779	3.42355	3.34585	4.97021	4.40933	3.46968	3.43812	3.01321	4.82939	3.46725	4.42147
Peak_120	Chr1	643455	644676	6.1326	6.35589	6.56305	6.6868	8.17186	7.66204	7.95933	8.40189	7.35938	5.41831	8.08711	6.77827	7.27195	7.4374	6.672	5.62278	6.97736	5.69138	5.28111	5.6712	7.11187	8.93188	7.15627	7.66608	4.05701	6.72312	5.75595
Peak_121	Chr1	650884	651999	8.71385	7.51194	7.06122	7.7373	7.0568	6.46615	8.56361	9.23232	9.18665	7.83892	9.84211	10.119	8.63873	9.61675	9.38992	7.52225	9.3148	7.80505	8.06428	8.4929	7.46775	9.28976	10.5241	9.84064	5.83132	7.26449	6.12002
Peak_122	Chr1	657368	658282	7.87941	8.15068	9.15851	7.15003	13.2545	11.3394	8.94473	9.78548	10.1789	11.3143	10.4178	10.0963	8.40039	10.6711	9.18904	8.45608	10.0154	8.05367	10.6047	9.44414	8.95191	11.449	10.5005	10.425	7.69616	11.2263	8.97885
Peak_123	Chr1	669170	669947	3.64887	3.44815	2.7805	4.69473	6.55191	5.36238	5.27999	5.00743	4.57641	6.35753	8.55065	6.73361	4.24469	5.66452	5.61804	4.85953	4.51725	5.60748	4.44752	5.30745	6.29203	6.04906	6.81602	6.13569	3.87917	4.21934	2.69387
Peak_124	Chr1	673346	673894	1.70367	1.67972	2.57796	3.16182	2.05698	2.43424	2.00608	2.37436	1.47612	2.81151	1.69469	2.3534	1.88931	1.84739	1.76655	2.69773	1.97614	5.25474	2.69773	2.94624	3.43728	2.11088	1.14377	1.05095	2.13782	1.66175	2.90133
Peak_125	Chr1	686695	687453	5.52261	4.95736	4.41159	4.9357	7.33316	5.44897	8.15181	6.07487	7.68617	6.26762	6.60547	6.87186	5.41216	7.11875	5.73918	5.31687	6.21998	5.18692	5.71536	5.06131	3.6839	4.52854	8.60661	6.97582	3.80518	6.60764	4.72345
Peak_126	Chr1	691658	692676	4.93621	5.42983	5.93151	6.82197	6.72195	6.42997	8.53351	8.90937	9.62237	7.56884	7.65111	7.50109	8.65772	9.07068	8.80289	7.23009	7.39624	8.18991	7.46883	7.48335	7.01392	8.47382	8.14797	8.7658	5.18301	6.08799	6.15251
Peak_127	Chr1	701386	702215	4.34317	5.05019	5.45421	7.8684	7.82285	6.35532	8.02288	7.01086	6.59298	5.64433	4.66202	6.62664	6.65041	4.67984	5.11357	4.80858	5.46609	5.2324	6.13549	4.52735	4.72143	6.77518	6.36127	6.49396	3.91736	4.44417	4.20453
Peak_128	Chr1	705532	706754	8.53346	9.09796	10.3842	9.60064	9.31973	10.4192	8.0133	10.9326	9.59123	9.49714	12.442	11.8546	8.61544	11.3425	9.41784	11.0146	9.57914	9.89365	11.1181	8.16786	8.92323	14.0791	12.4406	13.4702	7.33455	10.8305	6.76332
Peak_129	Chr1	711198	711778	3.14329	2.80378	2.09081	3.99206	2.52934	2.93392	2.75851	4.80688	2.89148	1.5872	1.44291	0.721456	1.7315	1.8871	1.82486	2.36525	3.01597	3.57333	2.2549	2.05403	1.53345	2.79246	1.47686	1.6353	3.59313	3.71479	2.30866
Peak_130	Chr1	726249	727499	5.35447	5.34527	6.44507	6.14154	8.84308	8.27807	6.54099	7.43844	6.43718	6.17045	7.74985	7.84051	7.30441	8.49882	7.17038	6.47529	8.18347	6.59618	7.85365	5.24935	7.06132	8.29121	7.84052	9.30429	7.17038	6.75386	5.42805
Peak_131	Chr1	737266	738104	3.99682	4.97839	4.49838	4.79618	5.76599	5.80126	5.47407	5.44468	5.99522	4.50817	6.1069	4.13788	4.61005	5.04304	6.17547	5.10182	4.69626	4.76091	5.33888	3.49721	4.46507	5.32713	6.21858	6.20486	3.1661	4.07127	2.6665
Peak_132	Chr1	739564	740483	4.38105	6.29464	7.26126	6.23032	6.33394	5.59603	7.65434	8.58344	8.1439	7.55249	8.38153	6.5144	7.1076	9.26596	6.65198	8.56021	7.99024	7.52569	5.98017	8.29398	8.10459	7.05043	8.1582	7.57215	5.42986	4.30244	6.14991
Peak_133	Chr1	746021	746652	2.49429	1.30047	0.928533	1.45912	1.97411	1.73482	1.97411	1.19383	1.85706	1.59177	3.11852	1.62038	1.77904	2.67896	2.29922	2.7856	2.06514	2.44228	3.52946	2.86883	1.72442	2.29142	2.43967	2.07554	2.17178	0.933735	2.74918
Peak_134	Chr1	749253	749794	2.10478	3.09044	5.06178	2.47478	3.06011	2.772	3.11167	2.19576	2.92364	2.1442	3.1693	3.36946	2.77503	1.49215	1.91068	2.27462	1.91068	1.87732	2.42019	3.76979	3.42405	3.3725	1.85609	3.18143	1.85609	1.23739	3.27848
Peak_135	Chr1	752369	756975	3.85775	5.45087	7.18779	7.06041	5.34989	5.98678	8.03341	8.09799	7.93243	8.43802	5.37737	6.71216	7.05827	7.78578	7.64948	6.137	7.19742	6.27794	5.24071	6.90127	7.48999	5.11334	5.02235	4.7494	4.38546	3.98513	4.4115
Peak_136	Chr1	761120	762327	9.60147	11.7283	10.8438	10.4792	10.2641	10.0873	12.9326	10.9758	12.308	11.1867	14.6471	13.5994	13.4143	15.2323	12.7992	12.274	13.0986	11.0126	10.1839	11.6154	11.3391	11.2439	13.5272	12.3937	8.92245	10.4792	10.2233
Peak_137	Chr1	773381	773990	3.50046	2.96421	2.53036	4.24421	5.36252	5.48648	3.35225	4.18223	2.75941	4.01785	4.07713	4.3493	4.41937	5.35983	4.12294	3.67023	4.67267	3.2229	4.03941	4.68614	4.18223	4.55949	4.8128	4.77777	4.23612	3.45465	4.37355
Peak_138	Chr1	775426	776293	4.72305	6.66416	5.62827	7.11299	5.89908	6.02028	5.96536	6.60924	6.35169	7.15843	7.04102	5.60744	4.99954	6.20776	7.54286	5.20975	6.23996	5.38966	5.84037	5.12453	4.81963	6.51266	7.55045	6.81188	2.89746	5.04499	4.84993
Peak_139	Chr1	782869	783467	3.50712	3.33423	2.82929	4.39899	5.27714	4.20963	3.35893	4.29471	3.35893	3.60042	3.72665	2.54115	3.65805	3.05157	2.37101	1.95937	3.13116	2.65915	2.91162	3.66079	3.63884	4.39899	4.7969	4.44564	2.70855	3.49888	2.7991
Peak_140	Chr1	786994	788340	7.09502	8.76443	8.5045	9.47711	9.19643	9.88103	10.7121	8.01393	9.21351	8.10789	7.19264	8.26409	7.89678	8.71439	8.30436	10.0141	11.3955	11.5248	8.2226	7.38911	8.08958	8.61921	8.39589	7.46234	8.0066	6.41041	7.6222
Peak_141	Chr1	789951	791287	5.24242	6.07599	6.44975	8.43779	7.02267	7.67921	5.76863	6.96612	7.1739	7.95706	7.27471	8.90129	7.97674	7.4579	8.46483	7.75175	7.86609	7.1739	7.58577	7.09644	7.87346	6.63294	7.3866	7.49602	5.88174	5.92846	6.70916
Peak_142	Chr1	794553	795486	6.43436	6.90075	8.40374	5.89582	6.1422	7.95495	8.47766	8.97396	8.2207	6.71067	7.27033	8.57093	7.19466	8.9458	7.86695	5.17776	6.61387	5.70222	7.77895	5.56494	6.37276	8.34742	9.29075	8.28406	5.29567	6.78283	5.39951
Peak_143	Chr1	797710	798544	5.62235	5.74834	5.82315	7.3941	8.65597	8.21697	7.49056	7.5004	7.54764	7.76222	9.50838	9.18946	7.21495	8.60675	8.93551	6.93147	8.02996	7.27795	8.26619	7.38622	6.96297	8.69732	10.5321	9.96707	7.35078	6.12238	7.51615
Peak_144	Chr1	799032	799663	3.69592	4.66347	7.5427	5.42554	5.39173	5.18625	4.98859	4.12768	4.49701	5.00939	3.87018	3.97942	5.82609	6.23963	6.05757	5.88851	4.38777	3.78436	5.45935	5.23567	5.98474	3.65691	3.26937	3.31619	3.15233	2.45268	3.45404
Peak_145	Chr1	802932	803610	5.04999	3.9509	3.83712	4.53192	3.35294	4.9241	6.54853	4.03564	6.42506	2.96318	6.50252	4.85874	3.99448	4.24383	3.08664	5.12262	5.45186	4.51255	4.02837	4.9822	4.15426	4.81758	5.35018	5.50512	3.98964	4.07437	2.6412
Peak_146	Chr1	807312	808247	2.5974	3.52466	3.62477	4.16567	4.99634	3.83199	4.39924	4.33953	5.04552	4.66969	4.47827	4.63808	4.63282	6.25904	6.55232	4.68726	4.54676	4.33075	6.23796	3.78282	4.0603	6.1203	6.39427	5.26504	2.5974	3.60369	3.58261
Peak_147	Chr1	812467	813226	5.11305	4.91406	4.475	5.87655	5.4829	6.23558	5.05249	6.87796	6.13392	3.86939	4.53339	3.5774	5.50453	4.70642	5.84626	4.21329	4.93137	4.86215	7.08126	6.09283	4.21329	4.67831	5.35097	5.40504	4.08784	4.67398	4.08784
Peak_148	Chr1	813345	814163	3.78734	2.86609	3.52843	3.10293	5.40302	6.72367	5.91684	6.75579	6.06536	5.58366	5.08591	5.31873	6.03927	6.04328	5.16017	4.28308	4.4015	4.69253	5.14211	4.80893	5.98507	6.39653	5.24246	5.41306	2.96845	3.70304	2.25193
Peak_149	Chr1	818716	820224	3.04248	1.92919	1.66122	3.55555	2.66666	2.77777	4.19716	4.69389	4.1525	3.06318	4.63616	3.57734	3.05555	3.16666	2.72657	2.16666	3.1318	2.57625	2.88779	2.61111	3.07734	4.11111	2.86928	3.33333	2.36819	2.44444	3.03158
Peak_150	Chr1	823299	825192	6.62983	7.03774	7.16272	9.3906	7.41527	8.05578	9.32204	7.96118	8.67111	9.05125	10.308	9.53206	9.60063	10.0554	10.3574	8.80824	8.79089	9.10072	10.2246	9.56764	8.95404	10.6759	10.8035	11.4779	6.39723	7.28596	6.80514
Peak_151	Chr1	826433	827229	4.97674	4.04038	3.68151	6.59578	7.16502	6.19978	6.24929	7.32383	7.91163	5.16648	7.10108	6.02241	7.66002	4.99117	6.31116	7.13615	4.34975	6.12966	5.2098	6.49471	4.83855	6.41428	8.38807	9.20274	4.33737	4.81587	5.27373
Peak_152	Chr1	830529	831726	8.86933	8.43985	10.1536	7.73185	10.1564	9.00653	8.23815	8.22169	7.78947	8.00763	9.58968	8.40006	8.25325	9.01339	8.67448	9.36877	9.40033	8.75407	7.89649	7.65637	6.16077	9.83666	9.36877	9.65692	7.22828	9.37701	8.3095
Peak_153	Chr1	835716	836637	6.15084	8.09236	8.01927	6.56089	6.90498	8.29917	7.93547	6.77662	7.87128	6.99412	7.6306	8.88751	7.79997	7.79462	8.78232	7.90695	6.12053	6.36478	6.31485	7.08148	6.53058	6.9763	8.16189	7.96578	5.7283	6.60546	6.4557
Peak_154	Chr1	843188	844313	7.38099	5.44377	7.22187	5.72114	6.42041	6.7007	6.98391	7.43209	7.08756	7.07296	8.52697	8.16784	7.93719	8.64959	9.17514	7.08026	6.5518	6.40435	6.81019	6.25398	6.43501	8.71091	6.18246	7.09924	7.72843	6.69924	7.44522
Peak_155	Chr1	846577	848723	6.35848	7.72818	8.37283	6.67698	7.66463	7.00313	8.43715	8.2289	7.41044	8.78856	8.25722	9.05882	8.82302	10.1789	9.3712	10.1169	9.40795	9.51361	9.44929	8.03825	8.50222	8.85747	8.70282	8.7388	6.91126	7.14554	7.38747
Peak_156	Chr1	852327	853894	7.461	8.68021	10.7391	12.3945	8.75254	10.3188	9.15616	10.2601	9.5021	9.82813	9.23163	8.92447	10.6731	10.0829	9.65725	9.71492	13.0088	9.85959	8.06274	9.83337	10.8429	9.77887	9.84072	10.1636	9.86482	8.23362	9.44549
Peak_157	Chr1	863660	864115	1.10307	1.6546	2.23858	4.53844	2.74325	3.81027	3.12536	2.20614	3.86074	1.94299	2.80093	1.90694	1.88171	1.71228	1.90333	1.59693	3.79946	1.83845	3.0821	2.68918	2.30347	2.71081	4.02656	2.20614	1.83124	2.36114	2.5558
Peak_158	Chr1	867250	867726	1.40601	1.31641	2.03664	2.55701	1.0166	2.50876	2.79134	1.71271	2.5639	1.66102	2.50187	2.66383	1.70237	1.34742	1.51628	1.34053	2.59491	2.09867	2.39504	2.66728	2.75343	1.78508	2.72586	1.75751	2.81201	1.83677	1.05451
Peak_159	Chr1	870033	871373	8.16133	9.13216	9.3528	10.6448	10.5283	9.52563	11.3153	10.7821	11.2687	13.9949	13.5536	12.3682	14.1077	13.9924	12.9297	10.7612	12.1059	11.5641	11.3778	10.19	11.7149	12.2641	14.4423	10.9647	7.62688	9.18977	7.80094
Peak_160	Chr1	875435	876002	2.96634	3.82007	5.14842	5.62593	2.05473	4.18182	3.98503	4.1934	3.68984	2.98081	2.32966	3.16892	3.39466	2.21101	2.50909	3.09947	2.65669	1.91872	1.32834	2.13577	1.79138	2.89978	3.1805	2.67405	2.2139	2.21391	2.96924
Peak_161	Chr1	876984	877636	2.56763	2.89992	3.44365	4.1208	3.64	2.74636	4.05535	3.77341	3.70796	3.68531	3.0006	4.2819	3.02578	4.32218	3.38323	4.62678	4.01507	5.20323	3.4663	4.27939	3.48392	3.53931	2.96033	3.2473	3.16926	2.69602	2.78915
Peak_162	Chr1	879261	880207	4.80292	4.50784	4.72307	4.78209	5.49376	6.18981	5.39135	6.00235	6.4901	4.30822	4.6519	4.12249	4.08257	4.4384	4.39327	5.81488	5.25943	6.10823	4.7248	4.22143	4.57553	4.42625	5.59791	5.25596	3.80137	4.63628	4.32384
Peak_163	Chr1	882824	884355	3.66741	3.99466	3.01826	4.43887	4.73716	3.58801	4.84446	5.0569	5.08158	5.04939	5.03222	4.3305	5.66957	4.80904	5.05583	5.68137	4.55475	4.9936	4.71784	4.34445	4.45926	4.59231	4.62664	4.43458	4.20389	4.76506	4.06226
Peak_164	Chr1	891697	892555	6.97319	6.44694	5.9628	6.40676	8.81598	6.76268	5.86521	8.32611	6.78756	5.36767	8.0582	7.20855	7.75777	7.18368	6.83157	6.3283	6.19243	5.80397	5.84224	6.8488	6.55219	7.43054	9.30205	7.13393	4.8797	7.76159	5.8231
Peak_165	Chr1	896727	897503	3.2368	3.86724	3.79108	4.09572	3.67684	4.38555	4.14015	3.90321	4.14226	2.69734	2.71849	2.96178	2.47732	3.96032	2.32077	3.84609	3.55625	2.8285	3.34893	2.27422	2.48155	1.82996	2.37366	2.0669	3.66838	4.57807	2.21499
Peak_166	Chr1	898756	899831	7.18012	10.2492	11.8716	10.9642	12.7959	12.168	13.3291	14.0272	13.1946	11.2438	10.127	12.4949	13.0984	14.5405	13.9111	12.1359	11.6822	11.9984	10.2905	9.89022	9.94369	10.5991	10.1286	8.81016	7.8691	8.72614	9.11569
Peak_167	Chr1	900840	902177	5.48667	6.47196	7.74596	9.0089	9.00398	8.80372	7.45602	8.3418	8.01992	7.50147	6.48792	6.50021	7.32211	6.75206	7.6833	7.04569	6.89212	6.91915	5.33801	6.2029	6.77663	6.49653	5.60092	5.59847	5.725	5.43015	6.04811
Peak_168	Chr1	907496	908969	4.27229	6.27405	8.15092	7.09818	3.68904	6.36996	10.0545	9.29399	9.09771	9.14343	5.67965	8.35834	7.98922	9.04195	8.34496	6.44468	8.05055	7.79629	4.98489	7.60112	7.96245	5.02727	5.45997	4.7429	4.47748	4.7206	4.89122
Peak_169	Chr1	910744	911201	2.04576	2.21086	1.76941	2.15702	1.43203	1.73351	1.09825	2.63796	2.08883	3.3773	1.88425	2.24316	2.40826	3.90489	1.68327	1.42486	2.49081	1.62225	2.74563	1.09825	2.44774	2.59848	2.25034	2.51234	2.66308	2.59848	2.74563
Peak_170	Chr1	916988	918880	5.95081	7.68751	7.46348	7.01975	9.39382	8.31619	7.53989	7.28894	6.15574	6.53868	9.45808	8.50289	8.71564	8.72519	9.96172	8.85024	8.0227	8.59147	7.50602	7.74482	7.73961	7.97667	10.5444	9.82626	6.18439	6.65244	6.51002
Peak_171	Chr1	930874	931703	8.17141	8.02288	7.59906	7.01284	10.0014	7.93573	8.11992	7.7773	7.17127	9.01509	8.0506	8.23874	6.51772	7.94761	8.01495	7.41289	8.65267	6.56525	10.6113	8.68633	8.18329	9.21908	7.68224	7.44656	7.27228	8.36946	6.91777
Peak_172	Chr1	933528	934426	4.381	3.00051	4.46694	4.00251	5.2166	4.63881	5.96811	6.30637	6.1546	4.81251	4.33528	2.91274	4.73938	5.12884	5.50184	4.26398	4.21827	4.82714	4.45413	5.93702	5.03559	4.37003	5.68835	5.31534	4.95513	3.62219	3.65692
Peak_173	Chr1	937066	938680	3.48096	3.8657	3.7568	4.21685	5.51865	4.12525	5.23671	5.6754	5.0077	3.41073	4.94968	5.10745	3.58173	4.49573	4.54154	3.89318	3.94509	4.15273	4.66266	4.72678	4.34713	3.77512	4.96088	4.51609	3.42396	3.18071	2.855
Peak_174	Chr1	942786	943475	5.12195	4.76222	4.93137	5.89382	4.30005	3.96177	6.3274	4.42394	6.51321	5.0076	3.3519	4.46443	3.75927	4.45729	4.14759	4.30959	6.43936	4.51685	4.31673	3.42575	3.86886	4.97187	5.08622	5.0481	3.52342	2.42995	3.69733
Peak_175	Chr1	944658	945012	1.17612	1.03258	1.65305	1.27336	0.708449	2.10683	1.83363	0.9446	1.0974	2.5143	2.80602	2.94493	2.28278	1.68546	0.629733	1.78733	2.21333	2.12535	1.89846	2.49115	1.90772	2.15313	2.13924	1.52803	5.13973	2.3615	3.6719
Peak_176	Chr1	957336	957921	2.38153	2.86681	3.29038	3.00987	2.15712	1.57366	3.68871	2.00284	4.00568	2.45166	1.81209	2.20761	0.939709	1.66903	1.85978	2.36189	2.97621	2.84437	3.61297	3.44747	3.15013	1.1024	2.1459	1.67465	1.87661	2.99865	2.43763
Peak_177	Chr1	966160	966792	3.44339	1.72169	1.57108	2.77081	3.17591	2.59682	3.56544	4.21205	3.83031	3.45637	4.20685	5.36763	2.96817	3.70826	3.79915	3.09022	3.13437	2.70849	3.64594	4.93396	4.25619	3.17851	2.60461	2.48776	2.38388	2.64876	2.28001
Peak_178	Chr1	981322	981985	3.61436	4.02035	3.26282	4.73332	5.91665	4.39911	6.11965	5.89932	6.68655	4.73579	6.18401	4.75065	4.51794	5.37944	5.54036	6.0033	6.14688	6.27313	5.20863	4.86947	5.88694	6.8648	5.96864	6.64447	5.13189	3.15637	3.95846
Peak_179	Chr1	982374	983538	9.74844	9.82182	10.8137	10.0349	12.2586	9.95726	6.6711	7.48383	8.11029	7.28205	9.4733	9.32797	5.84568	5.94586	7.1861	7.99742	9.06694	8.16392	8.6253	7.30886	6.16173	10.4963	9.55655	10.1562	9.08951	10.6063	9.24895
Peak_180	Chr1	991066	992051	7.90219	7.1103	8.31897	5.49152	8.51235	7.92219	8.69741	8.68407	8.43233	7.73047	11.0431	9.69935	10.4446	10.6763	8.74242	9.26924	10.8163	10.8497	7.78882	8.26895	7.14031	11.6332	11.4848	12.1867	6.88024	7.54709	5.95831
Peak_181	Chr1	993435	993996	1.99185	2.05912	0.541105	2.84007	2.73185	3.57129	1.80173	1.79003	1.20505	1.25185	2.38963	2.7728	1.49169	1.64086	1.79003	2.0562	2.08837	1.60577	3.62101	3.09161	2.68505	3.22908	3.3373	2.63825	2.39256	1.59992	1.93628
Peak_182	Chr1	995979	996793	5.34685	6.58121	5.28231	7.11771	7.59571	5.95596	6.97249	8.22701	8.10397	5.91159	6.97652	7.06123	6.58322	7.27502	6.42187	5.31458	5.38114	5.23996	6.65179	4.73169	4.86077	6.97451	9.85265	6.62558	5.65947	6.79702	6.40371
Peak_183	Chr1	1004844	1005974	5.66969	5.02148	6.13623	4.60871	6.22198	5.92984	6.57661	6.37895	6.19727	5.46185	7.12889	6.06065	5.8034	5.11449	5.98217	4.76859	5.48802	4.40088	5.00549	4.59563	6.11007	5.65806	7.03297	5.39936	4.51715	3.8544	4.29914
Peak_184	Chr1	1008469	1008968	2.012	3.55387	2.85033	2.60047	4.65192	4.32645	2.7254	3.31388	3.75441	2.778	4.3133	2.74513	2.68266	3.85633	3.04758	3.19553	3.6788	4.51056	3.01799	2.03172	2.18953	4.53357	2.89636	3.6525	3.35333	2.20268	4.52699
Peak_185	Chr1	1012714	1013424	3.6598	2.73502	2.49921	2.42522	4.02971	4.79265	3.90024	4.80883	4.51984	3.06563	5.28278	2.82981	4.13144	4.4736	3.65517	3.35462	3.84707	4.51753	4.72098	5.04465	4.49441	4.09213	4.5707	4.79959	3.12112	4.48054	2.71421
Peak_186	Chr1	1013575	1014635	3.87166	3.47659	2.3704	4.48982	5.47206	5.0646	6.81684	6.95008	6.93149	7.62866	5.99417	7.21346	7.31107	6.74557	6.09642	5.2877	5.20559	5.46587	4.89883	6.27459	4.66179	5.37446	6.31643	5.34193	3.80349	3.6625	4.11954
Peak_187	Chr1	1017994	1019233	8.36476	8.88176	9.61882	9.38285	10.3757	9.60025	10.8172	11.7982	11.1552	8.85657	12.2621	10.0854	11.1115	12.7712	13.2961	13.4671	12.7075	11.6908	8.97057	10.4738	10.1279	11.0359	11.2255	9.0594	9.73547	8.95335	10.2087
Peak_188	Chr1	1027469	1029009	2.44808	3.15531	3.37291	5.10204	4.0428	3.73772	3.43158	4.70843	4.1004	3.62679	4.02573	3.64492	4.56975	4.77669	4.24334	6.08234	5.14471	4.97724	4.0108	4.37348	4.20387	3.78893	3.97133	4.0812	3.76759	4.09401	3.82946
Peak_189	Chr1	1035499	1036272	4.07762	4.07124	3.62313	4.60431	6.35853	5.41558	4.94623	4.81668	4.65527	4.57245	7.4374	6.92769	6.74718	7.26962	8.31663	6.95531	5.06092	5.65769	4.8188	4.66377	7.92161	5.42196	7.46289	6.73019	4.24751	3.4681	3.75055
Peak_190	Chr1	1040484	1040907	2.47731	1.46933	1.66317	2.36101	1.68643	1.95781	1.52748	1.77948	2.33775	1.77948	1.49647	1.78335	2.92315	3.27594	2.94254	1.49259	3.16352	1.88028	3.17902	2.16329	2.25245	1.77948	1.59339	2.27572	2.88051	2.39978	3.24105
Peak_191	Chr1	1042455	1043813	2.99486	3.21863	1.82764	2.60418	2.54733	2.63562	2.15543	2.13971	1.69943	1.38252	2.22075	2.15906	2.28244	2.77593	2.60901	3.14606	2.82916	2.66949	3.26217	2.02117	1.82643	3.29604	3.87542	3.97461	3.48836	3.32628	4.30602
Peak_192	Chr1	1048971	1049599	2.45915	2.07499	1.12635	3.65345	2.75968	2.04101	1.06624	1.66731	1.372	2.60288	1.56539	1.6856	2.91126	1.79013	2.72571	2.33894	2.53232	1.21782	3.20656	2.42256	2.08021	1.63334	1.73003	2.1168	2.31541	1.73264	2.23179
Peak_193	Chr1	1050515	1052031	3.7676	4.58679	5.02889	4.64205	6.18398	5.54792	6.65426	6.82655	7.78226	4.68431	6.31293	6.51122	4.93678	6.23166	5.65194	5.17951	4.40041	4.99638	5.85566	4.27688	5.33771	6.46463	7.88195	6.22949	3.9724	5.41139	4.03416
Peak_194	Chr1	1059391	1060294	4.04401	3.20939	4.26585	3.91127	5.48414	4.93864	4.95682	6.34423	5.84236	5.23685	6.10784	4.82772	4.86954	5.42595	4.49496	4.69316	5.76781	3.77308	3.77307	3.36576	4.25312	5.52597	4.895	4.66771	3.75853	2.68934	3.80217
Peak_195	Chr1	1069683	1071018	4.93137	4.47982	4.67053	4.37523	5.72496	4.54748	4.50196	5.23035	5.0827	3.11901	4.8317	4.96581	4.56594	4.51796	4.69144	4.54134	5.31648	4.25835	4.91291	4.35924	4.11685	4.89446	5.79509	5.81232	3.45122	3.55703	2.66746
Peak_196	Chr1	1073266	1074126	4.56481	5.67403	4.66599	5.45066	5.0841	6.19523	5.40866	6.38424	6.18759	6.5446	5.04019	5.47357	5.39148	5.22728	4.7099	7.75311	7.81993	6.74316	6.15514	5.34183	5.66066	4.31662	5.22538	4.98101	4.71181	6.27924	4.42353
Peak_197	Chr1	1079824	1080714	7.33894	7.38321	9.20227	8.37391	8.71152	7.56032	8.29458	11.1394	8.69492	8.04737	9.47715	10.2538	8.73736	8.92553	10.2631	8.02892	8.96428	7.70053	9.00117	9.34985	8.11194	8.54364	9.98265	9.38122	6.95889	5.73942	7.23931
Peak_198	Chr1	1086149	1086863	2.46223	2.46913	3.30597	3.63473	3.77956	4.1658	5.23254	2.95192	4.90837	2.90134	2.79789	3.03239	3.59105	2.92203	3.29217	2.46223	3.52438	3.04848	2.34498	2.55649	2.79789	1.88518	2.67604	2.02772	2.24613	2.46223	2.076
Peak_199	Chr1	1095901	1096185	2.05906	0.882455	1.47076	2.16865	1.1593	1.96101	2.13981	3.63941	3.49521	1.88026	3.09724	0.472949	0.22494	2.90691	1.78798	1.93794	2.57239	0.761334	2.94151	3.14915	2.79732	1.07279	2.05906	1.17661	2.93575	2.11097	1.19968
Peak_200	Chr1	1096937	1097616	5.05465	4.90719	5.49461	4.71622	6.62108	5.47768	6.90391	7.30519	7.03444	4.10222	7.89743	5.17793	4.43098	6.18596	7.35353	4.55426	4.7549	3.06518	5.88621	5.132	4.31494	6.60175	4.85401	5.1876	3.85565	5.3955	6.59932
Peak_201	Chr1	1108019	1108759	4.29914	5.06225	4.27474	4.47883	6.20913	5.0689	8.33874	7.68654	6.41987	4.46995	6.67498	4.99791	5.51035	6.56184	5.35507	5.83201	4.68735	6.17142	3.97082	4.72728	4.186	6.09821	7.31164	6.32448	3.0369	4.21706	2.48897
Peak_202	Chr1	1109377	1110218	6.37603	6.81333	7.90268	8.24042	8.91784	7.18035	7.28382	7.8734	6.58686	5.37647	8.55277	8.66405	5.38038	9.56403	6.89922	7.76602	7.60984	6.13004	6.03048	7.01636	6.78599	7.2682	7.83826	5.90163	6.06562	7.15692	5.2691
Peak_203	Chr1	1114311	1115460	9.29956	12.1712	14.9656	14.0723	11.7338	11.3779	10.1658	12.7186	12.2741	10.2744	13.5805	12.327	12.3284	13.8135	12.1111	11.0077	12.9759	11.0248	10.1014	9.60401	8.44192	11.6323	11.9039	11.4837	8.23752	9.03941	7.92877
Peak_204	Chr1	1125413	1126163	6.31907	5.5114	5.5705	6.84657	6.41975	5.8222	9.18639	6.72181	8.87339	6.01482	8.92592	5.81783	6.62112	7.06982	7.80307	7.14862	5.90101	5.89444	9.82771	6.10018	7.27338	7.80745	8.61074	7.466	6.85313	7.92127	7.47912
Peak_205	Chr1	1128111	1129476	4.1552	6.27672	7.96022	7.71113	7.40547	8.93373	3.4404	4.17806	4.4801	4.29599	4.96265	4.60285	3.49696	4.04328	4.32487	4.17325	3.25268	3.74365	4.51861	3.53186	3.53065	4.32006	4.94581	5.19129	5.21656	4.39708	4.29599
Peak_206	Chr1	1136323	1137493	1.85716	2.92401	3.98243	3.54727	2.83417	2.95769	2.64887	3.26793	2.60395	1.81224	1.73644	1.64098	1.40656	1.14546	1.6466	1.57501	1.48938	1.31531	1.14546	2.57728	2.64887	1.3869	1.57501	1.57501	1.91892	1.28864	1.874
Peak_207	Chr1	1140575	1141493	6.00099	7.28526	8.37993	7.99357	6.55548	8.5731	9.03458	8.81994	6.94362	11.4636	10.2079	10.673	9.1741	10.292	9.23669	8.6214	8.26724	8.59099	9.91281	10.3385	8.92546	7.92203	8.37993	8.56237	7.29777	7.13143	7.11533
Peak_208	Chr1	1142110	1143157	6.55163	7.01747	7.57743	10.545	10.3913	9.58197	8.73028	10.0306	8.20169	5.06939	9.08789	7.01276	7.4394	8.77105	8.36167	6.75553	6.55006	6.8716	7.11942	6.98296	6.79945	8.20326	9.07378	8.72557	5.19958	7.80486	6.10931
Peak_209	Chr1	1146000	1146414	2.18248	2.03988	2.92713	3.16479	2.49935	2.41221	1.20016	1.81807	1.22393	2.74889	2.45182	2.1904	1.46951	1.64775	1.29523	2.19832	2.55084	2.95486	2.85583	3.28361	1.0853	1.76658	2.03196	3.28362	2.57461	1.8458	2.30526
Peak_210	Chr1	1147619	1148524	4.21108	4.69006	4.91867	6.56971	5.44663	4.78985	6.14879	6.31752	5.74781	5.53372	5.82946	5.26702	5.00757	5.95828	5.74237	4.23648	5.73693	3.14606	4.60297	6.01271	5.47748	4.34896	6.46811	4.48141	6.19958	6.12883	4.35078
Peak_211	Chr1	1153761	1154759	4.27648	5.28678	5.78699	5.67839	7.1708	6.62945	6.20987	7.30079	6.71337	6.0338	6.97335	6.16379	5.5484	6.63603	5.37728	5.88407	6.0552	6.6673	5.96799	5.23248	5.80838	7.14448	7.569	7.73848	6.04203	5.45461	6.04532
Peak_212	Chr1	1156672	1157857	4.08591	4.24114	3.81703	3.56478	5.43032	5.33192	5.00898	3.48855	4.69713	4.80247	4.47676	5.22935	3.61051	5.22797	4.33539	3.89049	4.63615	4.41301	4.92998	5.48299	5.08937	3.81703	4.6611	3.85999	2.5031	3.83366	4.02908
Peak_213	Chr1	1164169	1164948	5.11471	5.68372	6.00615	6.0209	5.9366	6.94606	4.67637	6.81329	6.00615	4.16005	8.20208	5.79962	4.89765	5.45611	5.52355	5.41818	4.79438	5.35707	6.19792	3.94088	3.87133	6.474	8.86592	5.77434	4.83653	6.64892	6.33069
Peak_214	Chr1	1165085	1166413	5.58443	5.64751	6.22018	6.64566	7.26903	8.34386	6.24491	6.83861	7.36427	5.15895	7.53124	6.4292	5.74027	6.05567	5.77243	6.94992	5.62277	7.50651	5.05629	4.59246	5.71924	7.01424	8.20534	7.56959	5.99259	7.10453	6.78047
Peak_215	Chr1	1168078	1168821	4.63089	2.02822	1.91554	2.25358	2.38393	1.71228	2.75511	2.89431	3.2699	2.06136	2.05032	1.81391	2.32649	1.98403	1.36319	2.5872	3.25002	2.77721	3.25002	3.60352	3.5284	1.36099	1.91113	2.07241	3.62782	3.11304	4.28622
Peak_216	Chr1	1183039	1183785	3.47902	3.32719	3.3822	4.04016	4.51767	5.67514	6.83042	6.51354	5.27905	4.96217	4.70031	5.21523	4.37464	6.58835	3.74528	5.22624	4.15238	4.6343	5.70815	6.50914	5.61132	6.87003	5.01939	6.50034	4.58808	4.26461	4.45385
Peak_217	Chr1	1187209	1188467	4.36603	4.59451	3.55654	6.17302	5.68079	6.17432	6.4237	6.21741	6.25658	7.12221	7.94606	7.50868	8.66547	8.17455	8.48268	6.93682	6.65872	7.22405	5.72649	6.30619	7.70974	6.34406	8.10535	5.17552	3.79547	4.87784	4.46134
Peak_218	Chr1	1190530	1192366	6.79976	7.30175	7.0852	7.23017	8.73436	9.18535	7.73932	8.73078	6.9295	7.99702	8.48112	9.05291	8.96791	10.3092	10.898	7.11384	7.64268	7.25612	6.45167	6.81228	7.19616	8.72541	10.8506	9.51823	6.62526	7.88518	5.03248
Peak_219	Chr1	1198071	1199524	5.16313	5.29992	4.89971	4.63404	6.93127	6.84987	4.95285	6.14442	5.41862	3.96702	8.24494	6.22695	5.75439	4.5922	4.84318	5.52829	4.9438	5.53507	6.0031	4.44637	4.11399	6.13312	7.2433	6.30496	3.7477	4.5142	4.32427
Peak_220	Chr1	1202202	1203344	3.95056	5.31823	6.57803	5.33836	7.20362	7.80476	6.88579	7.61349	7.66238	6.72328	7.1202	6.37956	5.65763	7.27265	6.14659	7.37188	7.09864	6.66144	5.89491	6.33498	5.62742	7.61924	7.14322	6.95914	3.70032	5.83883	3.74059
Peak_221	Chr1	1215951	1216969	8.6674	7.99794	9.65141	11.2404	8.51092	9.332	7.47206	9.51107	9.2207	6.99295	10.5306	9.13681	9.35782	9.34007	9.39008	7.68016	7.86889	7.6608	6.34609	8.48027	6.1025	8.50447	9.98695	9.86757	6.41706	7.07523	6.33479
Peak_222	Chr1	1226458	1227292	5.54754	3.81517	5.9452	7.18149	8.67566	8.78196	8.15792	7.48859	7.82719	6.83304	8.32721	5.77983	7.30354	6.26017	6.83698	7.07518	4.78569	5.58101	5.61841	6.43144	5.82117	9.63437	8.65598	9.47492	4.86246	6.54956	4.75419
Peak_223	Chr1	1231572	1232365	3.10332	5.85677	6.08036	7.97258	7.24178	7.0037	4.25853	4.6436	4.74711	4.63118	1.47817	2.21725	3.61675	2.85075	2.69548	3.78237	4.31029	4.41794	4.37446	3.76167	3.74924	3.06192	4.24818	4.04529	4.80922	4.84856	3.69542
Peak_224	Chr1	1232604	1233113	2.29808	1.91131	2.43668	2.42056	3.34881	3.28758	3.23601	2.77188	3.27791	2.40444	1.59544	2.30775	1.26668	1.47296	2.3013	1.91131	2.92014	2.72031	2.54948	2.34643	2.3013	2.36899	1.31503	1.5471	2.84279	0.986273	2.70419
Peak_225	Chr1	1234976	1236079	4.99092	5.67733	7.41641	6.42477	7.59805	8.19214	6.03467	7.2824	5.99447	3.82955	4.14669	3.87273	2.64138	3.56154	2.9615	4.12734	4.05289	3.44838	3.34862	2.9615	3.71341	6.22823	5.61926	5.55672	5.77112	5.17258	4.70802
Peak_226	Chr1	1237341	1239114	4.11596	3.73327	3.17546	4.09187	3.49699	3.8806	4.48845	4.57092	3.92322	4.99252	4.39486	3.91581	2.96697	3.21808	2.5639	3.40526	3.4451	3.74717	3.16619	4.56165	5.17969	3.39877	3.34317	3.87504	4.33093	3.42657	4.88225
Peak_227	Chr1	1240299	1241261	9.16118	8.06703	9.25677	12.6348	11.6141	9.64082	8.72932	9.52647	8.91196	9.36259	10.7196	8.43572	7.09577	7.95436	7.40302	7.21526	8.63885	6.79364	7.73246	7.2989	8.67981	9.02121	10.6957	9.93955	9.62375	10.8886	9.97026
Peak_228	Chr1	1242545	1243332	3.87167	4.89799	4.59343	5.01064	5.99941	6.20801	6.48337	6.32275	4.8667	5.87633	6.43747	5.42575	7.0758	6.14126	6.33526	6.24139	6.79002	6.54178	6.27476	4.46827	5.02523	5.11494	6.87346	5.00021	6.69197	6.9715	5.63853
Peak_229	Chr1	1248019	1248639	0.881452	0.809983	1.75496	0.94498	2.13878	0.944979	2.737	1.62791	1.79996	2.71582	1.21497	2.39289	1.48497	1.21497	1.47703	1.88996	2.26319	2.11231	1.70996	2.28701	3.63433	1.92437	2.56495	2.12819	1.26791	1.07998	1.83967
Peak_230	Chr1	1260814	1261558	4.53421	4.24737	4.27606	6.04561	6.35892	6.95907	5.87351	5.02624	4.95122	4.09292	5.85586	5.08361	4.76809	5.41016	5.1498	4.0488	3.9142	3.77961	4.75706	4.60923	4.41947	6.71195	4.48126	4.81001	5.24247	3.76637	4.83869
Peak_231	Chr1	1285753	1286654	4.27166	1.57636	0.650591	1.58001	3.25295	3.11445	1.58001	1.39412	1.30118	4.85847	7.0107	7.23668	8.64356	8.35015	8.59435	5.8134	4.67077	6.13049	5.4471	5.05346	6.01932	5.94461	6.60067	4.96417	3.6393	3.89808	2.97777
Peak_232	Chr1	1290473	1292823	5.38444	5.34878	5.4166	5.59839	6.09761	6.73946	5.85849	6.72688	6.11019	5.3264	6.68772	5.77668	5.95428	7.3925	6.73387	6.24514	6.78561	6.41225	6.81078	5.28026	5.88366	6.38777	6.4542	6.15844	5.31452	6.11929	5.65712
Peak_233	Chr1	1298477	1298971	1.03276	0.710648	0.753818	1.99247	1.02612	1.35488	3.04184	2.28802	3.27097	2.17179	1.25526	2.37104	3.17799	2.26477	2.32455	1.88621	2.3478	1.73013	1.42794	2.76953	1.92273	1.05601	0.873367	1.35488	1.0228	0.757139	1.6936
Peak_234	Chr1	1306677	1307923	2.44921	3.24012	3.08985	3.73049	3.3113	3.94931	2.22379	1.82306	2.01025	1.47901	2.58498	1.62138	2.8908	3.22694	2.82357	3.03976	3.16367	4.03368	1.99047	1.74529	1.53833	1.44342	2.26466	2.62189	1.2101	3.02526	2.1447
Peak_235	Chr1	1313462	1314574	6.21479	7.09207	7.31804	8.03433	7.15557	8.6369	9.23357	9.94101	10.1965	11.1521	8.56306	10.4594	11.8255	11.8595	11.0044	9.40637	8.20122	9.42262	6.65195	8.7713	8.76687	10.6573	9.58951	10.9822	5.57381	5.41579	6.26796
Peak_236	Chr1	1321891	1322417	2.10854	2.17404	3.34372	3.95507	2.44853	3.05052	4.92201	3.88333	3.927	3.24703	3.28134	2.74173	4.54771	3.51215	3.29381	2.49843	3.39051	3.51839	3.00997	2.77604	2.37679	1.93699	2.7542	4.15782	2.52962	2.84778	3.2096
Peak_237	Chr1	1330455	1331051	2.60198	2.74791	2.39272	2.06781	1.31338	1.32715	2.35692	2.02927	1.02427	2.82225	1.9797	0.982969	2.10636	2.75892	2.07332	2.38446	2.35142	2.63502	2.85804	2.71487	3.08933	2.00173	3.26004	2.0981	3.31236	3.18019	2.21925
Peak_238	Chr1	1332739	1333652	5.99066	5.86836	5.7101	6.21007	8.71351	7.04635	7.35928	8.05529	8.25491	6.4007	9.44369	9.58397	8.8574	9.07141	9.27823	8.21535	7.43482	8.51389	8.75308	5.96188	7.219	6.92585	8.04989	8.78186	4.86122	7.28015	6.746
Peak_239	Chr1	1334575	1335049	1.05895	0.705964	1.05895	0.705964	1.26312	1.58842	1.06241	2.11789	0.764794	1.75107	1.49844	1.57458	2.36706	2.78925	2.6093	1.86873	0.792479	1.89295	1.88603	2.06252	1.5019	1.41193	1.40155	1.23544	1.26658	0.882455	1.58842
Peak_240	Chr1	1336482	1337989	11.1741	10.6824	11.2613	11.839	13.0555	13.268	11.6591	11.0127	10.8165	9.97718	12.0788	11.1108	9.80169	9.27301	9.89543	11.9524	12.3818	11.1795	10.5865	8.11647	7.91482	11.5676	10.8372	11.0356	7.72733	10.1908	7.69572
Peak_241	Chr1	1342530	1343776	6.7597	8.15699	6.79266	6.54088	8.33889	7.55193	9.25373	7.86171	9.28008	8.20971	9.00063	10.4876	9.79682	10.9186	8.99536	7.19339	8.99273	8.67504	8.02648	8.60517	8.42853	9.55428	10.017	9.14036	6.77024	5.84883	5.7816
Peak_242	Chr1	1344990	1345501	2.79637	1.54747	2.82847	4.63279	3.78521	3.05321	3.42563	3.88153	4.77405	4.02279	4.59747	3.07889	3.72742	3.66	3.58936	3.00184	3.32931	3.19126	5.12721	3.39031	4.00994	3.22337	3.67926	2.85737	2.66152	2.86379	4.18331
Peak_243	Chr1	1350097	1350852	4.22036	5.05313	3.92683	5.11618	7.25354	5.75108	6.02723	6.98828	8.42767	6.38599	5.08139	6.74475	5.02921	6.7317	6.27944	5.39232	5.45755	4.90527	5.42711	4.56825	5.62497	6.16203	6.18813	5.9359	2.99404	3.70287	3.54849
Peak_244	Chr1	1357503	1358490	4.66683	4.41228	4.24257	6.92122	7.77804	8.23558	6.31894	6.70659	6.03942	6.65335	9.1157	7.42533	6.76649	7.94442	6.86797	4.19432	7.13251	4.71508	6.05772	5.83811	5.10107	7.0044	8.30213	8.00099	3.98802	4.31744	4.6036
Peak_245	Chr1	1361134	1362109	6.38147	8.58442	9.76168	8.88589	9.10315	10.1086	8.44968	10.2215	7.67662	9.7802	11.365	10.1069	9.02231	10.4657	9.28841	9.312	10.7823	8.91958	8.68041	11.0164	11.1175	11.1141	11.1882	11.3533	7.35157	7.98821	9.27662
Peak_246	Chr1	1364381	1365050	2.75273	1.75174	1.27332	3.48385	1.98972	2.13938	3.47649	2.62761	2.97599	2.4436	2.62761	3.16	3.40289	3.11584	3.40043	3.86904	2.62761	2.93183	4.78171	3.33419	4.14872	1.64379	2.06087	2.00199	2.78217	1.62662	2.78708
Peak_247	Chr1	1368067	1368942	6.8829	7.9431	7.8474	6.77406	8.30901	6.91292	7.55843	8.3259	8.37281	9.08399	9.60753	10.9098	8.53982	7.3764	8.17578	7.35764	9.34107	8.18329	8.38407	9.33169	7.00486	8.19455	10.5439	9.26789	7.16999	8.55859	5.75513
Peak_248	Chr1	1372351	1373195	4.96055	5.51885	5.96044	6.08883	7.51668	7.92909	6.21722	7.39413	6.02852	7.39218	7.05175	7.93103	7.2813	7.43498	6.54792	7.40191	6.07716	6.54403	4.83993	6.09271	5.75423	8.51658	10.7206	6.09077	4.26607	7.11401	5.24261
Peak_249	Chr1	1375145	1375808	2.90881	3.86439	5.24824	4.74322	3.57969	4.664	5.41658	5.42896	5.95626	3.58465	4.79521	4.12432	4.02778	5.93893	5.29032	3.9139	4.13423	4.42882	4.75065	3.62425	4.40159	3.80002	5.95131	5.06752	3.93865	4.04016	3.30986
Peak_250	Chr1	1383786	1384344	2.09958	1.05567	1.50558	3.14643	2.78474	2.53479	2.77886	2.89942	2.41128	2.79944	1.83199	3.54047	3.75807	3.92568	2.92	4.36089	3.41108	4.75199	2.74063	3.8904	3.63456	3.17584	4.26973	3.90216	2.24955	2.94059	3.29934
Peak_251	Chr1	1390412	1391327	6.48543	6.55362	7.23016	7.31271	8.22253	7.214	7.13864	7.3145	7.06685	9.00674	8.50606	11.2643	8.96906	10.4442	9.43204	7.19247	7.5783	7.71289	7.42037	7.27502	8.57784	10.1481	9.93272	10.0565	6.22342	7.55676	6.86407
Peak_252	Chr1	1398285	1399805	6.12773	5.52036	5.32151	5.87592	6.75239	6.87235	6.7351	7.75099	6.41412	6.27903	7.01501	7.42244	6.77833	8.40699	7.56402	5.88025	7.98767	5.50199	7.71748	7.3295	7.64291	7.15118	7.15767	8.42969	5.72029	6.57083	6.22824
Peak_253	Chr1	1400853	1401460	2.75767	3.44709	3.70393	2.6279	3.16051	3.18214	3.30921	4.29872	4.06351	4.46905	4.27439	2.94692	2.06825	3.48494	3.60119	3.06588	3.89589	2.29806	4.51501	2.83337	3.54982	3.46872	4.90703	3.73097	2.7063	3.50927	2.4819
Peak_254	Chr1	1406823	1407619	5.18093	5.90485	4.20744	6.66797	6.93402	5.82235	8.98825	6.58341	7.12377	4.72924	7.74045	7.49295	5.64086	6.04922	6.31116	6.45347	6.41635	6.2596	6.72571	5.32117	7.6167	5.85329	8.64588	6.52153	4.32087	5.44905	4.52299
Peak_255	Chr1	1410190	1410877	2.80256	2.99131	3.37598	5.68875	5.54539	3.97567	3.73675	4.14292	3.41182	3.4811	3.77259	3.65313	3.72481	4.99826	5.11056	3.05821	4.25522	4.1477	4.09752	3.75347	1.94961	4.7474	4.55387	5.42833	4.10947	4.64944	3.4811
Peak_256	Chr1	1411046	1412058	6.52161	8.74307	8.40393	7.93173	10.2359	8.78039	9.28668	8.61326	8.79337	9.31426	12.842	9.84488	9.16335	7.97229	9.21852	9.01569	8.05668	8.79013	8.23679	8.3309	7.90414	8.85504	9.43921	10.9873	5.20722	6.21979	5.53825
Peak_257	Chr1	1415620	1416207	1.98764	1.76959	2.0128	1.56831	2.0128	3.12823	2.2644	1.99603	1.56831	1.63261	1.81991	1.75281	2.68094	1.65777	2.2644	2.84029	2.90459	3.76282	3.25403	2.8319	0.992423	1.53756	1.51519	1.35864	1.97366	1.59347	1.45089
Peak_258	Chr1	1417713	1418581	6.35951	5.50073	4.39605	5.40237	5.74475	5.67286	6.65649	8.59726	6.81349	6.52408	7.43582	6.4522	5.07134	6.34816	3.978	4.82355	5.24348	4.76112	5.8904	5.17538	5.9112	5.9812	5.27374	4.86138	4.05178	5.95472	4.75355
Peak_259	Chr1	1420822	1421690	2.78252	2.41745	1.91618	3.01708	4.25039	3.98179	2.60472	2.94331	3.56942	3.66022	4.34119	4.57385	5.25672	6.17413	4.80463	5.81095	5.42507	6.03984	4.59088	4.32038	4.72329	4.833	5.32482	6.53732	3.44458	2.60472	2.16208
Peak_260	Chr1	1425544	1426383	5.51452	4.38735	2.15649	3.46957	4.63	4.71611	2.11931	1.54007	2.01951	2.63984	3.95488	3.99401	2.07235	1.99603	1.39722	3.08015	3.0371	3.88834	5.37166	4.11534	2.79444	5.77283	5.22881	5.17206	6.38729	5.44407	6.37555
Peak_261	Chr1	1431393	1432843	5.60542	6.05857	5.30748	4.49295	6.62953	5.5737	3.92878	3.91179	3.92878	5.46608	6.74508	6.04157	5.55897	6.48679	6.60007	7.97425	8.40587	8.08867	9.04027	6.25002	5.4842	6.67372	5.99286	6.41316	6.284	6.52871	7.45199
Peak_262	Chr1	1436462	1437412	2.64458	2.64458	2.54951	3.24091	2.37148	2.56334	2.11567	2.55643	1.85121	2.83817	3.54166	2.52531	3.635	4.05502	3.3377	3.44141	4.32467	3.56414	4.76024	4.35578	4.6911	2.55643	2.85891	2.37494	4.75679	4.2659	3.9807
Peak_263	Chr1	1440727	1441547	5.35583	6.22077	5.76628	6.40497	6.85746	5.59408	7.19984	8.35109	7.31395	6.47704	7.44009	8.4592	6.85346	6.81141	6.07461	4.80923	5.65415	4.90133	5.83034	7.54821	6.75134	6.32088	7.14778	7.34399	4.49289	4.595	4.08444
Peak_264	Chr1	1450139	1451017	5.829	6.82013	6.86689	6.91925	9.15584	9.64206	8.04316	8.14227	8.09738	7.17918	10.5116	8.4901	7.82062	9.29423	9.52237	8.39286	8.247	7.50458	5.30538	6.73224	6.32643	8.1778	9.69817	7.83932	6.00852	7.441	5.95055
Peak_265	Chr1	1452156	1452957	4.08693	4.18326	3.41055	3.08262	3.11336	2.47798	5.26545	4.52554	4.81659	5.57904	4.16891	5.66512	4.98261	4.72845	6.06275	4.92317	5.13428	4.84528	4.06233	3.91681	4.7387	4.59318	3.57452	4.39027	3.97215	5.07689	3.56837
Peak_266	Chr1	1453988	1455247	3.30193	1.9295	1.9295	2.90272	3.14537	3.15059	3.53676	2.82053	3.32671	3.97249	3.65547	3.27844	3.94509	3.53284	4.25689	4.10556	4.36648	4.66132	3.39325	3.65938	3.43369	3.77289	3.08928	2.72791	3.208	2.62093	3.32019
Peak_267	Chr1	1457892	1458803	6.75359	9.24271	10.335	8.05853	7.95218	10.3656	8.39198	10.7297	9.3941	8.63349	9.30218	9.85191	8.32889	8.82454	7.57548	8.68757	10.0646	9.48783	5.14765	7.5899	8.14144	9.7618	8.81554	8.97055	5.77489	9.0084	8.05492
Peak_268	Chr1	1469679	1470373	1.70292	1.67217	0.964987	3.49808	1.86611	2.62533	2.5189	1.19204	2.01512	2.17831	1.03121	0.964986	1.44748	1.40018	1.26536	1.68873	3.42476	2.29184	4.22654	3.18824	1.9891	0.844364	0.72374	1.5681	3.42002	1.56574	2.55438
Peak_269	Chr1	1475564	1476228	2.8995	3.15163	3.65589	3.78195	4.33812	4.25902	3.62128	4.79047	3.87341	3.84127	3.67071	4.79047	3.92779	3.29005	3.78442	3.07994	5.41832	3.65589	3.71274	4.5062	3.07252	4.22194	4.02419	3.20601	3.76712	2.62265	3.10219
Peak_270	Chr1	1478179	1478783	2.0921	2.21708	1.38567	2.35564	2.49964	1.60575	1.32318	1.74432	0.86129	1.8367	1.24711	1.27971	1.24711	0.739025	1.10039	1.60303	2.07851	1.70085	2.84742	2.18719	1.52967	1.14929	0.358645	1.41284	3.16259	1.0542	2.53225
Peak_271	Chr1	1482482	1483648	9.4289	9.30917	9.13733	11.5446	11.3882	12.1178	12.053	11.4305	12.5658	10.5078	13.3686	13.1855	13.256	13.1644	11.1882	11.2741	13.2376	10.922	8.84293	11.4812	10.1191	12.284	12.8968	11.4755	9.11478	11.4121	9.25282
Peak_272	Chr1	1485752	1487076	7.48203	7.52917	9.22383	9.55631	8.81442	9.56126	9.56995	9.22879	10.1233	9.78953	9.87389	10.22	9.32804	11.0996	10.3217	10.3763	8.93601	8.98439	7.84056	9.94585	8.50924	11.7224	12.4283	13.185	7.73635	9.55383	7.41627
Peak_273	Chr1	1490360	1491014	3.88486	2.09301	2.19088	3.68159	4.35917	3.32773	5.55124	4.01285	4.62519	4.09316	3.96015	2.98642	4.02289	4.48716	4.46207	3.49337	2.86596	4.02289	4.08563	3.58371	3.37039	4.46709	2.69782	3.98023	2.95631	3.32773	4.09065
Peak_274	Chr1	1492823	1494341	4.08188	6.41283	7.69194	7.13246	5.63909	6.31002	8.66479	7.73739	8.66479	5.64775	5.79925	4.78419	5.74947	5.83496	4.64459	5.13265	5.02227	5.35341	4.28965	6.12606	5.40967	5.06772	5.24303	4.7052	4.29181	4.02885	4.7409
Peak_275	Chr1	1501214	1501927	6.9274	5.797	5.21224	5.35498	5.70491	4.70344	4.83698	6.78236	6.02722	5.698	5.37799	7.17603	7.74929	5.34346	6.25284	4.37423	5.25828	4.48704	6.92969	5.16619	5.40102	7.73778	7.64799	5.73484	5.38951	3.99206	5.63584
Peak_276	Chr1	1503048	1503921	6.02597	7.461	6.36451	7.19393	7.67352	8.80009	8.65904	8.52739	10.0715	7.36131	9.83452	7.74687	7.87476	7.31805	7.57384	6.688	8.29041	8.0177	6.9325	5.60468	6.01092	9.56181	7.68669	7.82398	5.17962	6.40777	5.88115
Peak_277	Chr1	1504923	1506401	4.36454	5.7816	6.63184	5.48485	6.62072	5.50041	8.03556	7.19199	7.88218	7.94998	6.64406	6.81633	6.40511	7.00194	7.15309	5.95498	6.72186	6.37732	5.48263	7.72102	7.92886	6.12837	6.62628	6.45512	4.13781	6.85857	4.28563
Peak_278	Chr1	1509713	1511022	3.64143	4.79961	3.7117	4.44952	5.31157	4.70801	5.50356	5.51987	5.96783	4.28012	4.73561	4.91505	4.79836	6.35933	5.13841	5.29651	5.06563	5.11959	4.65154	4.26005	4.15213	3.65272	5.26263	3.80079	3.39172	3.58998	3.34153
Peak_279	Chr1	1523543	1524259	3.76444	3.56957	2.92306	4.27339	4.27797	4.1473	5.44262	4.60123	5.5687	5.37383	3.86989	3.88136	4.7365	3.75297	3.57186	5.05058	3.07895	4.84196	3.03998	3.83321	3.11105	4.9199	4.46139	5.00014	4.29173	4.02121	3.36552
Peak_280	Chr1	1533600	1534496	7.04245	9.65566	10.8376	10.3594	10.6122	10.2164	9.72346	11.5505	10.5609	11.4405	11.2756	10.8578	9.20485	11.3288	9.60434	11.1858	11.1272	9.51272	11.4314	9.11505	11.1089	12.4778	14.347	12.5676	9.90488	10.7204	9.64099
Peak_281	Chr1	1547060	1547778	1.92271	0.909914	0.688151	1.63693	1.30314	1.68723	2.83948	1.67122	1.82897	2.42339	2.05988	2.54456	2.44625	2.63372	2.50798	1.90899	2.68859	2.56513	3.7311	3.76768	2.44854	1.2597	1.92957	2.37538	3.29443	1.53176	2.21534
Peak_282	Chr1	1553654	1554133	0.904084	0.945179	1.68146	1.54105	2.27048	2.77389	1.90406	2.99649	2.09583	2.42116	2.7191	1.51023	1.48968	2.315	1.90405	1.74653	1.82872	2.56842	1.04791	1.40407	2.33555	1.57187	1.50681	1.22257	1.22257	1.08559	2.27048
Peak_283	Chr1	1563445	1564185	3.88875	3.58262	3.17888	5.44824	6.73931	5.82535	4.72062	5.09109	5.74993	4.06399	6.22687	5.23971	5.90522	5.32845	5.42162	4.54538	4.81601	5.4682	5.21309	5.5769	6.11374	5.47486	8.05035	6.57959	2.14957	4.41228	3.62033
Peak_284	Chr1	1564502	1565226	3.113	4.15368	4.84294	4.18543	4.48697	4.95404	4.50965	6.59329	6.35976	3.12206	4.31919	4.36001	3.89521	4.93136	4.04712	3.70023	4.41669	3.58459	3.5007	4.49831	4.57767	4.21037	3.68209	3.93376	3.3624	4.50965	3.22863
Peak_285	Chr1	1576732	1577716	5.79915	6.24306	7.88518	7.39455	6.61687	6.38324	5.98606	7.26772	6.86886	7.6749	9.42049	7.66823	6.87721	7.12252	8.59275	7.40122	6.94897	6.87721	7.74666	5.60223	5.71237	7.60315	8.57107	7.31945	5.27681	5.82919	5.02148
Peak_286	Chr1	1582761	1583744	2.91171	2.21678	2.64276	4.42353	3.57825	2.99858	3.22076	3.15227	2.99189	2.16499	3.32099	3.59328	3.06707	2.55589	2.3003	3.32266	2.52749	3.51811	3.09881	2.94178	2.92173	3.9775	3.74196	3.76869	2.04471	2.57093	2.2151
Peak_287	Chr1	1587130	1587810	3.73171	3.36241	3.59413	4.52585	3.25861	3.31895	6.0924	5.14619	6.96618	4.42205	3.42516	3.52654	5.11964	3.63033	4.07447	2.84344	4.05758	3.76551	4.90964	4.87343	4.43171	4.2724	5.43585	4.50413	3.44689	2.93516	3.22482
Peak_288	Chr1	1595097	1595917	3.1234	3.08336	2.5688	3.78011	5.93445	4.06642	3.62995	5.24971	3.68601	2.8531	5.10555	5.10555	3.18947	4.88131	4.01837	4.08445	4.57698	5.08153	4.43282	3.62995	3.70002	4.91735	5.41389	3.676	3.47178	3.15944	3.56588
Peak_289	Chr1	1604392	1605070	2.55889	3.08664	3.72334	3.6846	4.30193	3.5224	6.12729	5.42523	5.10083	3.80565	3.14958	3.72334	5.09841	4.74738	3.49577	3.26337	4.44477	3.63377	3.05275	4.62391	3.89038	2.46931	4.28257	2.78887	3.43041	3.51514	3.5684
Peak_290	Chr1	1610765	1611687	2.3615	2.61973	2.67316	3.23949	3.20922	3.67225	3.3606	2.82276	2.57343	3.42293	2.63398	2.54315	3.02044	2.63932	2.72659	2.96523	3.17894	2.77823	3.15223	2.68206	2.81741	2.94742	1.67406	2.83344	3.22524	2.22615	2.81563
Peak_291	Chr1	1624878	1625687	5.07139	5.06125	5.2033	7.51475	9.13012	7.1657	6.86738	8.1053	6.43512	5.59091	8.10935	6.61371	8.09718	8.72831	6.45948	4.68581	6.00287	6.48992	6.31336	6.79229	5.14648	8.568	7.10685	6.25654	4.93339	5.43465	5.07139
Peak_292	Chr1	1634587	1635973	7.18076	6.69723	6.61782	6.95085	6.83233	7.6157	7.97718	8.58397	7.73659	8.20827	10.562	9.56052	9.20024	9.79517	10.146	8.73448	9.90184	8.93832	9.62214	10.1602	9.5143	8.72737	9.72407	8.40975	6.70907	6.52775	6.5716
Peak_293	Chr1	1639338	1639840	2.37908	1.44771	0.86928	2.14052	1.73856	2.60457	1.63725	2.02614	1.89215	1.85294	1.53921	1.9183	2.03268	1.27451	2.16993	1.98693	4.07189	1.40196	0.833332	2.61764	2.21895	2.97712	2.98692	2.7549	2.27124	2.34967	2.39542
Peak_294	Chr1	1645646	1647213	7.46519	6.4546	6.88127	7.04166	7.65913	6.62442	7.97259	7.85937	6.95674	7.48511	8.05016	7.81952	8.01976	8.28184	7.8059	8.99891	11.1386	8.60054	8.39716	8.90665	7.3006	6.45774	8.19903	6.3571	7.56792	7.67696	8.05645
Peak_295	Chr1	1658633	1659526	3.71967	2.861	2.39949	5.00124	3.37583	4.14257	4.0396	3.53764	4.36505	3.28022	4.30621	3.51925	4.96998	3.61486	4.60959	4.43676	4.28966	4.7144	5.80474	3.89434	3.45857	5.03433	5.40023	4.75301	2.91248	2.58888	3.71231
Peak_296	Chr1	1669325	1670128	2.8153	2.12016	2.93183	3.43683	3.02383	2.72942	4.45295	4.37935	4.55926	4.97839	3.96022	4.08289	3.64537	5.86571	3.71897	2.71103	3.82937	3.96022	2.2551	3.4266	3.33664	4.46726	3.19966	3.44501	3.22624	2.71103	3.4634
Peak_297	Chr1	1671847	1672630	3.30016	2.59568	3.22468	3.43854	3.84948	3.98996	6.30049	5.91051	6.29	3.3966	4.60638	4.18914	3.95642	4.9712	5.58133	3.32741	4.19334	3.83271	3.68594	4.23946	5.1599	4.0319	3.38402	3.31483	3.54756	4.0319	3.93754
Peak_298	Chr1	1679173	1679628	1.11749	0.883176	0.825499	1.45994	1.67984	2.77569	1.44192	2.00787	1.77356	2.21335	1.97903	2.13765	1.47436	1.84926	3.0785	2.31789	2.54138	2.73244	2.1052	2.41882	3.34525	2.02229	2.46208	3.14339	1.67984	2.49813	1.9502
Peak_299	Chr1	1682141	1683642	6.25121	6.30922	7.45177	6.85423	7.81729	8.17626	8.60308	7.03262	7.18145	6.77324	6.30702	7.41346	6.5861	7.22085	7.31387	7.14315	6.51387	7.2887	6.36284	5.97214	7.20662	6.71524	7.16504	7.68159	7.08842	5.9995	6.37378
Peak_300	Chr1	1700242	1701169	4.73298	4.96679	4.84103	6.06324	6.67257	6.12346	6.1465	7.02684	6.05084	7.08529	6.13055	6.64778	5.06776	6.25454	6.05261	6.13232	5.94988	5.07307	4.67806	5.56373	5.94633	4.69755	6.19255	6.0225	2.69418	3.966	3.6135
Peak_301	Chr1	1706970	1707710	3.03912	3.60036	3.15004	5.38391	3.35413	5.33288	5.17982	4.16826	4.20153	2.97479	3.59814	2.62429	3.25874	2.71524	2.44461	2.91046	3.26983	3.70241	2.60211	1.87893	2.09633	4.94468	3.89984	4.12611	3.64473	3.74012	2.69972
Peak_302	Chr1	1714948	1715826	3.34555	4.14033	2.45914	3.82616	4.25814	5.07536	2.72095	3.41474	2.81445	1.04911	3.29319	2.17302	1.40629	1.75038	1.52597	3.34368	2.88177	3.21652	2.71534	2.47971	1.04911	2.37312	2.81258	3.00333	3.33433	2.86307	3.24269
Peak_303	Chr1	1718296	1719038	3.57519	4.4004	3.19245	2.96457	4.72783	4.57075	5.41588	5.86056	6.5132	5.59286	5.88932	7.26762	6.38932	6.55303	5.17472	5.44464	4.67916	4.42695	4.82075	4.87163	3.85394	5.34729	6.27206	5.26543	5.33401	5.6703	3.94907
Peak_304	Chr1	1721382	1722160	4.8132	4.07677	3.81933	4.3553	6.419	4.2308	5.09385	4.24558	4.37851	4.19282	6.57726	4.83641	4.88072	7.45085	6.67222	4.77733	4.74779	3.76658	4.53255	5.26898	7.30947	5.90836	5.57918	5.7712	5.9611	5.60661	5.80496
Peak_305	Chr1	1726533	1727147	2.54186	3.49339	1.9084	2.026	2.02066	2.23448	4.19634	3.08177	3.78739	2.66481	2.6755	2.17835	2.8626	4.11081	2.95347	2.8626	2.63541	1.71061	3.08711	3.61366	2.72361	3.56288	2.91873	2.84389	2.77974	4.3086	3.72859
Peak_306	Chr1	1729446	1730138	1.97824	1.79322	1.77899	3.44176	1.61295	2.38148	2.43841	2.22967	2.94838	3.38008	3.14526	1.91182	2.38385	3.81416	2.17749	2.56175	3.9375	2.50245	3.36585	3.73114	3.65286	1.90708	2.02331	2.3625	2.25102	1.44929	1.6936
Peak_307	Chr1	1730255	1730709	2.1026	1.88584	2.62645	2.21821	2.8107	4.55925	4.70015	3.31648	4.07876	0.552746	1.64379	2.35911	1.76301	2.36272	2.43497	2.11344	2.40969	2.44943	1.53902	2.57948	1.95809	2.99856	2.06648	1.94364	2.26156	2.47833	1.92919
Peak_308	Chr1	1732735	1733677	5.68615	6.21084	6.66754	6.0679	6.40432	6.91506	8.42464	8.85171	8.28518	7.43975	9.00161	7.71168	8.76629	8.01848	8.58326	8.41418	7.66288	7.58967	6.87846	6.56818	8.22243	7.0092	11.1073	8.86391	5.70358	7.08067	6.06615
Peak_309	Chr1	1744663	1745704	4.9077	3.94225	3.29862	5.0481	4.91086	5.57184	7.03422	6.91906	6.8733	9.69393	7.07996	7.68731	10.3786	10.8361	10.4606	8.49344	9.5772	8.61175	8.31675	10.0394	10.571	6.27542	6.4947	6.30067	5.25949	5.47088	6.06403
Peak_310	Chr1	1748359	1749008	2.32912	2.19256	1.75506	1.93967	2.75903	2.53902	2.45051	2.73628	2.33165	3.11814	3.25976	2.93859	2.8956	3.28758	2.81973	2.83743	3.64162	2.43281	3.31539	2.50109	2.13187	2.58707	2.69834	2.29625	3.44943	3.55311	2.79697
Peak_311	Chr1	1754118	1755256	8.44841	7.14088	7.79032	8.00391	8.95785	7.31551	9.83098	8.63458	10.3996	8.50613	11.404	10.0287	8.45418	10.6204	9.19742	8.7587	9.80934	8.93909	9.62027	9.71264	6.73967	9.14691	9.98829	9.89881	6.82338	10.8932	7.38045
Peak_312	Chr1	1765461	1766414	7.96221	9.40096	9.6284	7.85538	9.28034	10.3486	10.0402	10.2521	9.2924	9.16317	9.74039	11.9993	9.5388	9.7559	9.87651	8.9633	8.36023	8.38091	10.0729	8.84785	7.97082	12.0493	11.41	10.1195	6.85428	8.9633	8.87542
Peak_313	Chr1	1767728	1768830	6.61241	7.1817	6.49766	6.906	9.09374	8.09226	8.21894	7.60942	9.2383	6.25921	10.3128	7.25472	7.51851	7.21001	6.57813	7.21002	6.79721	6.37397	7.34563	4.757	5.80467	8.67646	11.0416	9.33815	5.99394	7.31136	6.23238
Peak_314	Chr1	1768859	1770030	9.33117	11.233	11.9483	11.1559	12.4126	12.2218	12.3004	12.4266	12.8109	8.83466	13.2022	11.5107	10.1362	11.247	10.8726	10.801	9.31434	10.5233	9.75193	8.58921	11.5037	12.1377	12.0998	12.1068	9.16566	10.6524	8.5836
Peak_315	Chr1	1772023	1773430	7.99713	10.3601	9.55336	10.3823	11.7564	10.1709	10.7278	9.39341	10.262	7.34217	6.86585	6.66038	5.95757	6.44556	5.9132	6.25994	6.01594	5.61317	4.98273	8.12087	8.67075	6.84717	8.45477	8.21661	8.56101	11.3127	8.27614
Peak_316	Chr1	1779272	1780295	4.45139	4.6665	6.71321	6.01331	7.21405	7.54473	8.70213	8.66842	8.35539	8.42923	9.52402	8.52394	7.45002	8.27352	8.92044	6.95881	6.93795	7.36816	5.87526	6.1931	7.02462	7.4115	10.4759	8.95255	5.56705	7.43076	5.94749
Peak_317	Chr1	1786766	1787596	4.32607	4.64059	5.44765	5.41006	7.40001	5.59798	5.26171	6.72153	6.73538	5.7582	5.54853	6.2547	5.19841	5.11137	4.92939	4.42696	4.53971	3.79001	5.32698	4.56542	5.35665	5.42193	5.22808	4.75136	4.25486	4.73554	5.78787
Peak_318	Chr1	1790134	1790778	3.7565	4.70455	5.16328	4.54144	4.31972	5.79786	5.40029	5.15818	5.16583	4.11074	5.66788	6.19033	5.68573	6.67199	4.61535	4.49302	5.06899	3.7565	4.57457	5.36461	5.41048	5.41304	5.86922	5.6475	4.67906	4.32482	3.76924
Peak_319	Chr1	1802936	1804127	8.1362	10.4088	11.1121	7.91556	9.01601	7.79006	8.9319	8.91535	9.07255	9.39386	11.4638	10.3385	9.45041	9.70552	9.79929	9.66416	9.95513	9.31251	7.71146	7.91556	7.26052	10.2654	11.9409	10.3302	8.14171	8.18723	9.00222
Peak_320	Chr1	1814848	1815632	4.76803	4.89367	5.38576	6.30294	6.55002	5.56166	7.34156	6.11448	6.51443	3.96394	7.39181	5.45696	6.20871	6.53955	6.19404	4.86226	5.6873	5.38367	4.34295	4.18381	4.38274	5.31666	7.17823	5.98255	4.77641	5.04654	6.96882
Peak_321	Chr1	1816607	1817415	4.35635	4.31977	4.80539	5.79491	6.0489	7.35946	4.52906	5.61205	3.9073	5.92495	4.55953	4.42136	6.82508	6.25615	4.68957	6.33336	4.39292	5.8579	4.57985	4.65096	3.47451	5.38854	6.76209	5.78476	3.83415	4.05969	4.08204
Peak_322	Chr1	1820400	1821918	6.27973	7.34457	8.06203	7.8153	8.64206	7.57939	8.32067	9.61276	8.18539	11.1483	9.15608	10.0218	9.35304	10.7707	10.8551	13.1276	13.0421	13.884	10.0445	9.38658	9.86922	7.75903	8.65722	8.70158	9.24806	6.40201	7.86183
Peak_323	Chr1	1822522	1823213	3.63914	3.49661	3.90756	4.5228	5.90291	4.95512	5.24017	5.20929	4.7247	5.24492	6.13807	5.33043	4.71283	3.41347	4.48003	3.51324	5.91004	3.83867	4.76746	3.49661	4.41115	4.59168	5.40883	5.08577	3.75553	3.1498	4.48241
Peak_324	Chr1	1828394	1829968	4.04529	9.80324	14.0061	12.4145	7.34538	7.00828	13.835	14.9663	14.3349	11.925	3.3001	7.4915	12.2277	12.1859	12.2684	8.46525	7.82444	8.14589	3.3001	8.94221	11.208	1.50707	1.80973	1.65005	4.24149	2.8962	4.78838
Peak_325	Chr1	1831786	1832584	2.41322	3.84717	3.07979	2.82263	1.94827	2.18074	5.07949	4.37589	4.22365	4.48081	2.45437	2.53049	3.94386	4.02821	3.41924	2.67244	2.37619	3.0119	3.26289	4.78529	3.43776	3.14768	3.2526	3.12299	1.38251	2.93784	0.839381
Peak_326	Chr1	1832820	1833499	5.30122	4.48658	3.9596	6.23915	6.4567	7.43814	6.15212	6.57757	5.78227	5.17793	4.74523	6.00466	5.16585	5.30605	5.8983	4.65096	5.21903	4.94829	5.46559	4.91928	5.26254	4.72589	5.82336	4.26418	3.5559	4.06838	5.26737
Peak_327	Chr1	1836814	1837737	5.89736	8.32746	8.14601	9.5016	6.65343	6.8082	6.49688	7.71193	6.55736	8.54627	8.97323	7.36147	6.18378	7.50378	5.82975	5.55579	5.93472	6.25316	7.89694	7.24049	6.87046	7.9432	8.07485	6.89537	6.36701	6.26027	6.9861
Peak_328	Chr1	1854369	1855129	4.37192	4.28336	3.87727	3.61806	4.47128	6.29003	5.68954	6.05891	4.36759	5.47569	3.70878	4.64624	4.98321	4.84712	5.39793	4.48208	5.24025	4.29632	3.04349	4.97024	6.89268	4.09975	3.30486	3.96367	4.29199	4.05007	4.67864
Peak_329	Chr1	1859934	1860810	2.76839	2.77214	3.64932	2.89209	5.78793	4.09354	5.75795	4.49277	5.60425	3.72055	3.34568	3.62683	4.42342	5.26312	3.17512	4.18351	3.81239	4.64459	4.27347	4.77954	5.12629	4.58836	3.68681	3.67182	3.44877	3.03079	2.29418
Peak_330	Chr1	1864767	1865369	2.72057	2.49703	1.31394	2.91139	3.85731	3.38299	3.14855	2.25714	2.17536	3.50293	2.6933	2.56246	4.01542	2.77781	4.33164	2.79417	3.29848	2.8078	2.54883	2.9441	3.0913	3.2685	3.62288	3.8246	3.78098	2.49976	4.10538
Peak_331	Chr1	1868107	1868978	3.72869	3.24988	3.26873	4.35265	4.64106	5.93045	6.24904	5.07086	5.29141	4.45632	5.85694	5.57606	4.7881	7.2255	5.66843	3.67213	3.49494	4.06046	4.68253	4.60902	4.64483	5.6722	4.71081	4.61467	4.13963	3.17259	3.74942
Peak_332	Chr1	1872847	1873803	5.75068	6.5116	7.48207	7.68819	6.80532	7.99221	8.62603	9.73391	8.66209	9.4608	7.9716	10.2715	6.9788	9.87819	8.45082	8.25673	8.1949	6.66963	7.40993	5.66823	6.09765	9.18255	9.5673	9.10182	6.44461	6.10452	6.00661
Peak_333	Chr1	1883238	1883597	2.52048	2.67572	0.630119	0.607289	0.237436	1.39722	0.46574	0.69861	0.484004	2.55244	1.16435	1.5753	1.18261	2.09583	0.72144	2.89489	1.98168	1.69858	3.07297	2.68485	1.63009	3.63917	1.63009	4.23732	2.99991	1.5342	1.90405
Peak_334	Chr1	1893474	1894259	4.465	4.06555	3.55109	3.01152	3.54481	3.6201	5.56713	5.54622	5.15304	3.85851	6.44131	4.69295	4.27051	4.21822	4.50682	4.04255	4.93346	3.07426	3.9338	4.53192	5.01293	5.91011	5.95612	5.65288	4.053	5.1175	4.01536
Peak_335	Chr1	1896331	1897808	4.03273	4.08945	4.42533	5.86559	5.71544	4.54099	7.08231	6.25374	7.41595	5.4285	6.43724	5.73101	5.89896	5.79774	5.4374	4.6422	5.12933	5.43518	5.9034	5.40292	5.84668	4.55323	6.50954	5.23277	4.65777	5.34621	4.37417
Peak_336	Chr1	1899852	1900639	6.27685	7.02157	4.57466	6.52301	6.86094	5.37151	8.41712	6.80879	7.46588	6.06407	8.08543	7.05702	7.24268	6.17046	6.51883	4.52459	6.98402	7.13421	7.05494	4.99186	6.70866	7.82886	7.44711	6.60853	6.09954	5.31937	5.31936
Peak_337	Chr1	1906959	1907987	7.07037	8.12469	7.4921	8.36431	7.72532	10.8851	8.60393	8.29243	7.62628	10.1151	10.5097	9.77167	6.548	9.76209	8.88189	8.31	9.45858	8.36112	9.63748	7.27164	7.77484	10.2877	11.433	10.0273	8.53204	7.73971	8.14705
Peak_338	Chr1	1911012	1912077	7.75634	8.0154	10.0031	10.128	9.94291	10.2822	9.32457	10.7679	9.15803	8.00614	10.0401	11.3292	8.96991	11.2598	10.3747	11.4819	9.579	9.88895	9.44792	7.8797	7.37083	8.92519	10.1603	10.7864	8.29296	9.40013	7.07631
Peak_339	Chr1	1919079	1919811	2.9512	2.53857	2.38159	3.57687	3.39298	3.67554	6.15131	5.36418	5.03901	4.46043	3.49389	4.80354	4.78112	4.86409	4.46043	5.02555	4.04107	4.89549	4.66674	4.82821	2.06314	3.50511	3.52977	5.09732	3.29655	3.66657	2.66639
Peak_340	Chr1	1922228	1923234	7.11384	6.59148	7.12689	8.08999	9.4073	9.55095	8.90454	7.98715	9.59012	11.1376	11.0952	9.4073	9.53789	9.15591	7.51702	9.94598	6.95876	10.4145	8.22873	8.11773	8.97472	9.43669	9.49056	8.98942	8.32667	7.78474	8.04101
Peak_341	Chr1	1944362	1945833	6.74378	6.46572	5.18039	6.57181	6.83981	8.0425	6.87667	6.56287	6.4311	7.25411	8.1296	5.82138	7.43725	8.23681	6.69799	5.52434	7.11117	5.90737	6.11507	6.05253	6.06482	6.53384	7.27533	6.8856	5.57905	6.72256	6.80631
Peak_342	Chr1	1946707	1947592	7.43416	8.88685	8.07794	7.20781	10.8442	9.35252	8.06867	7.74956	7.38035	5.19667	8.53619	7.50094	6.731	8.29872	7.84231	5.96848	5.14473	5.85716	7.03526	6.96105	5.0668	7.59371	8.16885	8.27646	5.42673	5.67719	4.57515
Peak_343	Chr1	1951925	1952861	7.88212	7.5716	9.71888	8.35754	11.0223	10.0925	7.9172	8.25929	8.49787	6.17868	10.5574	8.2435	7.04356	7.94878	7.62247	8.06807	10.1101	6.70147	6.05237	5.80676	4.84891	9.3417	8.82944	7.72072	5.69975	7.41898	6.39972
Peak_344	Chr1	1954709	1955724	4.37319	6.07361	5.92476	5.92638	6.14155	7.53457	7.18996	7.65106	5.52999	3.91694	7.15598	5.66427	5.11904	6.10758	4.69677	5.043	4.5819	4.78576	5.06727	3.28596	2.98503	5.44262	4.88445	4.92651	3.67102	4.92813	3.83604
Peak_345	Chr1	1962119	1963108	4.65408	3.62132	4.14268	6.69802	6.06873	6.8624	5.41454	6.351	6.58511	3.30418	5.41288	5.54571	3.99158	3.97996	3.60637	4.60593	3.89528	4.66902	4.06464	4.37845	2.50885	5.31326	5.61545	6.67146	3.82554	3.76245	4.07128
Peak_346	Chr1	1965875	1966450	2.30587	2.68828	2.60837	3.3789	1.60669	0.873262	2.55701	3.15916	1.84641	1.01881	1.98624	1.14437	1.01881	1.1301	0.582175	1.58101	1.16435	2.33155	2.86521	1.52678	1.46685	2.06901	0.873263	1.89207	4.27499	4.00103	4.40341
Peak_347	Chr1	1968094	1970498	3.15772	3.97517	3.52065	3.78447	5.01953	3.20692	5.8199	6.42957	5.82126	8.91268	6.62094	6.7344	10.1997	10.9242	10.9392	7.72137	7.66874	7.37279	5.77547	8.12052	8.68371	5.39887	5.4597	5.19383	2.8932	4.01891	3.27664
Peak_348	Chr1	1978437	1978910	1.08892	0.707453	0.53059	0.891253	0.527122	0.884316	1.05078	0.353727	0.884316	1.23804	0.43002	1.06118	0.707453	0.53059	0.53059	0.99529	1.19643	0.936335	2.47609	1.50854	1.80678	1.23804	0.707453	0.901656	3.00668	0.537526	1.61604
Peak_349	Chr1	1989434	1990098	2.82781	3.11208	3.84869	5.0253	3.38151	3.77206	5.0426	4.98822	3.80667	2.91927	3.25544	4.29609	4.91159	3.71274	5.09945	4.56553	4.51609	5.28484	5.00552	3.06758	4.41227	5.15383	5.14642	5.97696	4.16014	3.49521	3.68555
Peak_350	Chr1	1991539	1992995	5.59926	5.19988	4.95167	5.61957	6.6011	5.75269	6.04829	5.46613	6.11146	5.58121	8.05535	7.96509	6.27167	6.91023	6.43864	4.94829	5.9727	6.55598	6.50746	5.91515	5.75833	6.06521	6.29311	6.1408	6.12951	4.77568	4.13373
Peak_351	Chr1	2001342	2002628	6.18816	7.42579	8.20745	8.73239	6.82932	7.74381	8.84606	9.18453	7.95839	9.68264	10.9892	8.62765	9.87423	9.31607	9.42208	12.0851	12.5615	9.89722	9.10916	9.04913	9.24072	11.2856	9.16281	10.4222	7.6212	7.09882	7.59054
Peak_352	Chr1	2006478	2007229	2.17277	2.78482	2.78482	4.65376	3.58048	4.99913	3.56737	3.36408	3.0974	2.78701	3.04276	3.12145	2.00665	2.38262	3.03183	2.36732	3.06899	2.65586	3.58048	2.8504	2.79575	4.00674	3.80345	2.71487	2.33016	2.21212	2.80887
Peak_353	Chr1	2007535	2008357	3.72699	4.25228	4.6078	4.49795	4.54189	5.52456	6.68701	5.24295	4.55387	5.7243	6.15172	5.84214	5.95	7.19432	5.14108	5.90206	3.33551	4.35414	5.75625	3.97265	5.37277	5.30686	6.00392	7.71362	3.45335	3.58917	3.76893
Peak_354	Chr1	2012085	2013608	4.34569	8.40339	12.6563	9.76782	6.95698	8.75608	10.9877	11.4688	11.8161	9.04191	4.4557	6.82215	4.53876	4.09545	3.85061	4.72535	4.78252	4.51071	3.46554	7.5707	7.48657	4.59916	5.69717	4.23567	6.98286	5.25063	6.76606
Peak_355	Chr1	2015364	2016190	4.75049	5.8755	6.17365	4.93534	6.08221	6.28495	6.83156	6.18955	6.38632	4.82999	7.86514	7.00846	5.474	5.97886	5.15398	4.81608	4.5239	5.06851	5.14802	5.56741	6.09613	6.03849	6.6964	4.73459	4.77831	3.46249	5.13808
Peak_356	Chr1	2023878	2024770	2.44083	2.93047	3.45693	4.50615	5.27742	5.29399	4.91848	4.75465	4.54849	4.50431	4.78778	4.78594	4.80804	4.26685	5.20563	4.40123	4.36073	4.41228	4.61844	4.48038	4.1877	4.80804	5.91433	5.39892	4.88166	3.21395	5.04365
Peak_357	Chr1	2027659	2028384	6.21515	6.61365	6.10194	5.5993	6.60006	6.2559	7.41064	6.67704	7.18648	5.92986	6.37138	6.19477	5.10797	7.12308	4.93363	5.78949	4.15702	5.31175	6.70194	6.01137	6.61817	6.2061	6.84459	6.09515	4.84759	6.00458	4.42192
Peak_358	Chr1	2029901	2030645	4.38859	5.06375	5.06375	5.93309	6.2839	5.99045	6.91715	6.40305	7.46434	3.58986	5.30646	5.40133	4.82546	5.96397	5.42119	3.93847	5.17628	5.96398	3.48395	3.71342	3.66708	4.75265	5.18511	4.9777	3.95171	5.1829	3.14195
Peak_359	Chr1	2032404	2033503	1.85001	1.8261	2.6734	2.9364	3.17102	4.61157	3.18148	2.49557	3.2278	1.2956	1.67666	2.31326	1.91128	1.89932	1.71552	2.70627	2.51799	2.54787	1.83058	1.2956	1.3763	2.05772	0.712807	1.53171	1.75288	1.60344	1.52424
Peak_360	Chr1	2034090	2035509	4.90011	5.87944	5.52637	5.99404	7.12038	5.44071	5.72201	7.19331	5.69769	5.84702	7.30559	7.23151	7.47461	6.11327	7.80799	8.39721	8.42615	8.67851	7.01967	5.52521	5.30527	7.52786	7.26161	6.71407	4.73457	6.25797	5.97899
Peak_361	Chr1	2035649	2037102	7.00137	8.358	8.96283	8.81926	7.87865	8.02675	9.30764	9.34043	10.8271	8.93004	9.91699	10.0696	9.917	9.85594	10.2957	8.93683	8.78534	9.34495	6.78656	8.6915	8.93343	8.03693	11.1855	10.0131	6.6882	7.80856	6.91205
Peak_362	Chr1	2040334	2041138	5.9156	6.0422	7.04277	6.68951	7.44707	8.62121	6.1443	7.9882	7.08156	7.8718	7.47974	8.02699	7.80647	8.44356	8.68451	7.40216	8.03721	8.28837	7.18774	7.20408	7.24696	9.60749	8.70085	8.49461	4.43108	6.22189	5.3663
Peak_363	Chr1	2047688	2049866	8.15633	10.5651	14.0058	13.1669	11.7751	11.4288	12.6268	13.2861	13.6429	14.3445	10.8638	12.6373	12.5604	13.75	14.263	13.5682	14.174	13.0281	9.30147	11.2629	13.1925	8.07637	9.24565	7.15603	9.25017	8.75908	8.46411
Peak_364	Chr1	2051197	2052233	5.47031	7.17751	8.12542	7.82742	7.24091	9.07808	7.58647	7.19495	9.00041	7.07288	8.03982	7.20287	6.23752	6.81292	6.38652	7.39784	6.98571	6.27081	5.67955	6.77963	5.28326	7.92252	10.2955	7.83217	6.76061	6.15826	5.84282
Peak_365	Chr1	2054477	2055388	2.93791	4.06081	5.30446	5.59465	5.60726	7.00232	6.42015	4.94038	6.37689	5.27382	5.86861	4.64478	5.42342	5.28103	5.87222	4.29692	4.50961	4.43931	5.28103	4.19959	4.40506	4.60513	6.36427	5.23958	2.66575	4.83944	3.73277
Peak_366	Chr1	2059515	2060417	3.45687	3.15651	2.59948	2.75785	2.50664	3.1019	4.94957	3.91014	4.3179	4.8276	5.02238	5.75053	5.00782	4.13404	4.62372	4.31608	4.36341	4.75661	4.41074	3.64983	3.9957	4.56001	5.66497	5.10612	4.98233	5.10612	3.43502
Peak_367	Chr1	2066698	2068326	8.54286	7.15336	7.10694	8.20885	8.75577	7.70229	7.55901	8.54286	7.7255	7.67404	9.50652	9.36323	7.77596	9.8042	8.69018	8.41572	8.87081	9.22399	7.13115	8.20582	7.46213	7.79614	9.92227	10.3441	6.12611	8.75477	7.3592
Peak_368	Chr1	2070703	2071347	2.94098	2.33953	1.95216	4.25346	4.63574	1.97255	3.68769	5.28306	5.27796	3.62908	3.41755	2.74984	2.65555	4.33756	3.10408	3.91961	3.65201	3.59595	4.34011	4.28914	3.36658	3.19583	3.94	3.55007	3.89412	3.39971	3.70553
Peak_369	Chr1	2076330	2077829	5.58998	4.19166	4.68699	6.97076	7.37732	7.10335	5.85298	6.38996	6.36255	10.4118	7.36746	8.98275	6.66063	8.68249	8.30442	9.32795	9.26878	9.72466	7.26883	9.1811	9.41781	9.06824	6.97405	8.08744	7.08363	6.59707	7.16911
Peak_370	Chr1	2081227	2081988	2.83672	3.49036	4.40285	5.11689	4.95078	4.29067	5.48793	5.79856	5.48792	3.84413	6.22568	4.59484	5.25495	6.10272	5.61088	5.64972	3.72765	4.46325	5.66265	4.84292	5.49439	4.48698	5.70796	4.79762	4.18929	3.24443	3.07186
Peak_371	Chr1	2083327	2084168	2.01472	2.58867	3.18606	3.20168	2.34855	3.23877	4.74786	4.87866	4.87865	4.89427	4.86108	3.92596	5.59123	6.90508	5.57951	3.98258	4.80447	4.78104	4.48625	3.08649	4.94893	5.67517	4.27346	5.437	3.35395	3.76978	3.62727
Peak_372	Chr1	2087127	2087852	2.82569	2.32757	3.43022	4.04155	4.40834	4.87702	6.28081	5.42722	4.35174	2.64682	5.88005	3.51399	5.09439	5.3208	5.23703	2.91625	4.24306	3.21512	3.0838	5.40005	4.12532	4.69589	4.04155	4.90646	3.92607	3.34871	3.57965
Peak_373	Chr1	2090120	2091485	5.31644	6.30681	6.06132	5.69189	5.89525	5.03004	5.52944	5.28756	5.03245	6.50415	6.25626	6.1263	5.09382	7.00114	5.54147	7.82785	7.03845	7.87238	6.41751	6.23821	6.83628	5.70753	5.54388	4.60405	6.61246	5.74363	6.29236
Peak_374	Chr1	2095548	2096433	3.94806	4.25604	4.87385	5.60298	5.16142	5.10391	4.04639	4.61411	5.50279	5.70316	5.87571	6.15029	5.67348	8.33953	6.54918	4.99445	5.67719	5.85159	5.6271	6.31912	5.96105	5.64936	5.4156	5.57701	3.46012	4.55845	3.55845
Peak_375	Chr1	2102606	2103484	3.40539	4.34978	6.08707	3.78502	4.93697	4.37969	3.86356	4.09545	3.67094	3.52881	3.81493	3.71582	4.28619	4.95941	4.51434	3.21839	3.54191	3.92153	4.44141	4.70696	3.79436	3.71395	3.96267	2.7303	3.52881	4.09919	4.46946
Peak_376	Chr1	2104978	2106155	6.83191	7.25891	6.33375	8.31244	8.76175	7.23657	4.65647	7.86033	6.41328	10.3762	9.55713	9.88366	10.5381	10.6986	9.14688	9.75529	10.8395	9.86413	9.9911	8.41988	7.42077	9.0227	10.9581	8.872	7.69287	7.02448	7.36635
Peak_377	Chr1	2108490	2109728	7.23586	7.97218	8.12077	9.78578	10.5301	10.1175	9.5828	11.8249	9.04548	13.1689	12.1314	11.4176	9.9755	11.8475	11.3115	10.3364	10.7463	10.615	9.50982	9.44216	11.1523	11.7055	11.5583	12.1858	8.99904	9.54034	7.27034
Peak_378	Chr1	2113666	2114686	7.1145	7.02273	7.17085	6.96316	10.6774	8.89835	8.78888	8.66169	7.64579	10.0012	11.6562	10.972	10.9994	11.5596	12.9507	10.1461	7.60071	8.63915	9.68563	7.65545	7.42683	10.3876	11.9686	11.7625	8.74701	9.44253	8.24953
Peak_379	Chr1	2119939	2121888	4.88922	5.76085	6.34755	6.86767	6.9646	8.96159	7.84214	8.46931	8.05709	6.86007	8.67498	7.88765	7.30854	7.41222	7.52349	7.18125	8.04782	8.57215	5.79962	6.71424	6.4251	7.63308	8.42632	7.82444	5.44979	6.45714	6.54986
Peak_380	Chr1	2134634	2136374	8.52297	7.89982	7.99801	7.56464	9.8259	8.52296	8.81188	8.19912	8.88929	7.65622	10.0855	9.86367	9.46524	8.88363	8.39739	9.41426	8.90346	8.99882	8.06032	7.15487	8.2973	9.51717	9.46618	9.34533	6.52228	7.90454	6.67901
Peak_381	Chr1	2143050	2143841	2.85795	2.85795	1.4985	2.21247	3.46192	1.96756	2.6255	2.7521	2.73134	4.27551	1.81398	2.55493	3.91645	3.9206	4.00985	3.67777	4.99363	4.83797	2.71889	4.16758	5.91099	2.2187	1.4819	2.23738	3.75456	2.15644	3.93305
Peak_382	Chr1	2151378	2152489	6.10508	5.7843	6.31499	6.06812	7.10583	5.99569	5.22701	6.39925	6.02082	5.23883	6.27655	5.38666	5.80943	5.57587	5.80647	5.35266	6.25734	6.17012	6.39185	5.25214	5.78282	4.63129	3.81974	4.74215	6.45246	5.60692	5.67048
Peak_383	Chr1	2152763	2154020	8.15492	10.4364	11.0387	9.76473	10.1123	9.81177	9.89801	11.0623	11.1629	6.664	8.37313	6.51243	5.11561	5.48931	4.93136	6.64702	7.42972	7.04948	7.36438	4.72883	6.3308	8.27121	10.0261	8.89841	6.3308	8.44631	6.45102
Peak_384	Chr1	2155257	2156051	3.9637	3.331	2.75826	4.3855	5.05956	6.07891	5.31595	5.76877	4.81971	4.32347	4.53437	4.57366	5.8246	5.96106	6.30222	3.94923	6.53794	4.10224	5.06783	5.34489	6.29395	4.26145	3.78382	3.99885	3.99678	3.76727	3.68043
Peak_385	Chr1	2159614	2160867	7.42065	7.75491	10.3477	7.98562	8.32118	8.13242	10.2953	12.6745	11.6992	10.6636	10.7475	10.1826	10.176	13.0782	11.5603	10.0423	11.053	8.91893	9.21386	10.1682	9.99381	8.65676	8.94908	8.7341	7.40229	8.60171	6.73376
Peak_386	Chr1	2162364	2163261	2.89402	2.62494	2.905	2.30277	4.78126	3.81476	5.33957	5.4677	4.4536	6.09556	4.66594	4.10764	6.43787	8.72782	7.8803	4.79957	6.25116	6.30058	5.66356	5.21143	4.98628	4.76113	5.30113	4.61469	3.36446	3.34615	3.92276
Peak_387	Chr1	2164222	2165306	0.772657	0.54086	0.386328	0.695391	0.849922	0.309062	0.54086	0.231797	0.309062	6.10398	4.32687	5.1768	9.64609	10.7869	10.1369	9.93242	10.4097	8.94767	5.62827	6.60242	5.43283	1.95891	1.69984	1.46805	0.849922	0.927188	0.927187
Peak_388	Chr1	2168472	2169143	5.20044	5.36433	4.11681	6.84423	5.21022	5.11238	5.98809	4.69899	7.05704	3.81349	5.2249	5.17108	4.82374	4.88733	5.83887	6.04435	4.83352	5.73858	4.08256	4.61581	4.60358	4.94849	6.11284	5.36433	4.10702	2.54641	4.19998
Peak_389	Chr1	2169868	2171001	7.82612	7.84206	8.2117	8.64946	8.63206	9.4757	8.37695	9.58732	8.89443	11.8283	9.44671	10.4889	10.344	10.9339	9.69023	8.70454	10.0439	10.747	8.42767	8.97705	10.8151	9.70038	11.4906	11.2934	5.84313	9.14231	5.91416
Peak_390	Chr1	2173637	2174971	6.06663	4.98431	4.53735	5.17024	6.54683	5.09513	5.74156	5.6406	5.61104	7.85201	7.74858	9.45024	7.79168	7.54542	7.28438	8.16846	7.95052	8.78042	8.84198	6.05924	6.77585	9.81718	10.3503	9.90706	7.06028	8.97989	6.02845
Peak_391	Chr1	2183072	2184846	6.76778	7.20396	7.35862	7.71238	8.10688	6.65942	6.5094	7.20767	6.32881	6.75574	9.28671	8.15597	7.79295	9.43951	9.23762	7.88	8.13189	8.36341	6.18712	6.34363	6.77889	8.38471	8.64309	8.49492	4.89432	7.04283	6.20194
Peak_392	Chr1	2187853	2188459	3.44194	2.33705	2.07166	4.83388	3.05197	3.69378	4.19207	2.64306	4.41954	5.20488	3.45277	2.42371	1.93355	2.78929	2.90032	3.45277	3.58005	5.71129	5.19946	3.06822	2.32351	3.38236	2.18269	2.93282	6.4912	5.1101	4.91782
Peak_393	Chr1	2189821	2190702	3.99206	3.74232	5.92845	5.09537	5.88185	5.25565	6.53415	6.65343	6.11668	2.557	3.04157	2.36877	3.32672	4.29957	3.03225	2.58869	3.83551	3.13662	2.66137	1.52078	1.92893	2.26254	1.42574	2.16749	4.33498	2.59801	3.8821
Peak_394	Chr1	2192894	2193917	7.79355	10.2368	10.2464	9.79371	12.5178	12.6832	8.95094	10.3443	10.1453	7.05994	11.5418	9.75196	11.9801	12.086	11.4471	8.61866	9.4855	11.224	11.5836	10.2255	8.8161	10.8789	13.6784	12.391	6.9267	10.4005	9.58502
Peak_395	Chr1	2194671	2195793	4.67521	4.15265	3.6462	4.95918	6.97768	5.34853	4.43662	3.7589	3.83941	4.01945	5.44953	5.249	4.49517	2.89236	4.16729	5.25046	7.10064	5.25046	5.047	5.5959	4.89916	6.11993	4.71473	4.97382	6.09211	4.82451	5.75545
Peak_396	Chr1	2199999	2200684	3.98966	5.74607	5.62387	4.73248	6.21093	4.47848	7.27484	7.58635	8.30999	5.49207	6.2277	5.02481	7.07596	6.88186	6.15582	5.31236	4.96971	3.97529	5.82994	4.34909	3.66617	5.42259	7.27005	6.11029	4.03279	6.15103	4.03279
Peak_397	Chr1	2204234	2205235	4.00284	7.85147	10.1662	6.34548	6.68342	5.73357	5.4186	7.01809	5.60561	3.04314	1.25499	1.52403	0.836659	0.585661	0.45442	1.4781	2.09165	1.45677	2.09165	2.16711	2.31476	3.08251	3.1793	3.6813	4.9166	5.46289	5.77294
Peak_398	Chr1	2210912	2212568	11.5988	10.2466	10.5274	9.63556	13.3408	12.6454	7.13367	9.46096	6.92633	7.39953	12.3805	10.073	7.20509	8.82507	8.21993	9.71393	11.4966	9.50064	9.74964	8.06121	6.66642	13.7525	15.2772	15.2643	10.1941	12.4519	9.207
Peak_399	Chr1	2215111	2215958	6.12932	7.80994	6.69534	7.26911	9.74836	7.09659	8.89546	7.01906	7.71107	6.39682	10.1264	7.73821	9.10675	8.82179	8.79659	7.95532	7.03456	7.36797	6.86398	6.44915	6.33672	9.75612	9.13195	8.20925	4.74527	6.50537	5.12521
Peak_400	Chr1	2218475	2219550	3.10273	4.71138	4.70221	5.58216	6.75847	5.31481	5.95339	6.73098	6.75236	4.95581	7.3283	5.81131	5.07344	4.32487	5.01386	4.8336	5.34384	4.25613	5.29342	4.38292	6.28947	4.90387	6.73556	5.23538	4.36306	5.51189	4.20724
Peak_401	Chr1	2221600	2222996	7.6918	7.44706	7.1929	7.47294	8.48369	8.87787	8.05186	7.89654	8.01067	8.99671	11.017	9.15673	9.65564	11.2441	9.12614	8.9673	8.912	8.94377	7.69886	9.87802	7.53295	9.81214	12.2043	10.8605	6.96345	8.2213	6.90108
Peak_402	Chr1	2223719	2225191	5.33199	3.78417	3.47171	4.1502	4.66242	4.7729	4.55306	4.48276	4.14462	5.66008	4.89454	5.03626	5.62102	5.01171	5.74824	4.05312	4.08102	3.75628	5.02957	6.34303	5.9134	5.17911	5.23602	5.41346	5.10099	4.83651	4.88226
Peak_403	Chr1	2225728	2227456	8.94624	8.14574	9.1592	10.3029	9.8266	9.78762	11.4913	11.1928	10.7716	12.2671	11.4913	12.558	11.5436	13.1436	10.8648	12.7016	11.9762	11.6938	11.3515	12.9326	11.9876	11.8935	12.6103	11.8526	8.2313	8.92152	8.53363
Peak_404	Chr1	2227680	2228722	4.41916	3.27497	2.88096	3.9369	3.5161	3.86913	2.37821	3.87386	3.93847	5.79975	4.71072	4.45698	4.2127	5.39471	4.61458	5.07321	5.60906	5.5602	5.96838	7.10627	6.71384	5.07321	4.022	5.07321	6.4144	4.30884	4.79898
Peak_405	Chr1	2232561	2232966	1.28345	0.206486	0.206486	2.06486	1.25511	1.95149	1.05267	1.13365	1.65189	1.4373	1.43325	0.951454	2.10535	1.9272	2.00817	0.846187	1.51828	1.2794	2.21871	2.32802	3.33211	1.03243	1.85837	2.06486	1.23891	1.2875	2.03247
Peak_406	Chr1	2238020	2240191	7.29488	6.90891	7.54917	7.80875	7.57717	7.07616	9.18161	8.95456	9.18614	13.7406	11.5375	11.695	11.726	12.4533	12.8582	13.752	15.8029	13.9427	12.7098	10.923	12.1203	10.2487	10.8708	9.71743	7.17908	6.32995	7.67706
Peak_407	Chr1	2244184	2245075	8.27607	7.00822	6.02784	6.92713	8.11574	9.89958	8.13233	7.11879	8.86577	8.06414	9.66923	9.64896	8.59119	8.58013	7.43206	8.39401	7.93515	9.54946	10.1852	6.87	7.79509	9.86089	11.2706	8.1397	7.42469	7.33071	6.72995
Peak_408	Chr1	2247648	2250333	9.89394	11.3921	12.5763	10.9992	12.5457	10.9931	13.1577	14.3327	13.31	12.922	14.6509	13.8547	12.6638	15.0266	13.3865	13.266	15.0726	13.449	11.9918	11.9716	11.9539	13.296	14.5407	13.3272	10.05	11.6883	9.95636
Peak_409	Chr1	2259350	2260249	3.46109	4.99347	5.88111	5.77335	7.34225	4.77246	6.11124	4.94963	6.03087	2.515	4.06929	2.88759	3.83916	2.98074	3.40264	5.3204	4.50398	5.22725	3.31132	3.34419	2.60814	3.67296	2.8328	3.47387	2.23555	2.1424	1.74972
Peak_410	Chr1	2262186	2263635	4.64342	3.851	3.03251	6.29514	6.04007	6.16817	5.01072	4.57767	4.89735	5.23065	4.62641	4.93703	4.45637	4.97217	4.79079	4.05846	4.38041	4.13781	3.61407	5.53333	4.19336	4.97331	5.43471	4.50965	4.46543	3.56419	3.00643
Peak_411	Chr1	2268631	2269061	0.583526	1.33486	2.09001	3.37911	1.3997	2.20443	2.22731	3.92831	2.45233	1.73151	1.85355	1.14035	3.58888	1.14798	2.24638	0.846685	1.44165	1.88788	2.76126	1.72388	1.75058	3.0473	2.28834	3.3486	2.86805	1.55607	2.54005
Peak_412	Chr1	2275002	2275576	1.01486	0.794736	1.02058	2.16408	2.62434	2.56717	2.89593	1.91823	2.75013	2.12406	2.61577	1.42366	1.70096	1.66666	2.45282	2.47283	2.75871	2.96168	1.78673	2.33275	4.09089	1.45797	0.863347	1.66952	2.9531	1.31217	1.9897
Peak_413	Chr1	2276071	2276617	2.34097	1.31022	1.5326	1.7099	2.60542	1.96233	1.86316	2.60542	2.7136	2.91194	1.89021	2.60241	1.93829	2.91194	1.77601	3.49192	2.96603	3.66923	3.09224	3.2425	2.91494	2.48822	1.5897	2.72262	1.9443	2.45216	2.2989
Peak_414	Chr1	2277718	2278624	3.467	3.73885	4.99117	5.87016	5.81941	5.89371	6.41567	5.15247	5.76685	6.56428	8.87319	7.31458	7.67162	8.07576	6.38848	7.48676	6.25256	6.35768	6.65308	6.32505	8.09026	7.57919	6.3468	7.29284	4.62145	4.33873	4.52902
Peak_415	Chr1	2281247	2282782	1.32595	0.982421	1.037	1.36447	1.09158	0.654947	1.62239	1.82358	1.18896	2.83703	1.65128	2.18637	2.58661	3.31433	3.76594	3.8537	3.67498	3.60221	3.27259	2.72894	3.30149	2.29232	1.28956	2.71289	2.23773	1.14616	2.14035
Peak_416	Chr1	2286828	2287879	2.14536	2.31099	2.63287	3.37508	2.43131	2.62975	4.89855	3.26726	5.24387	4.57823	4.30322	4.69698	6.13608	5.347	5.297	5.42982	6.35953	6.85641	3.64383	2.85632	4.89542	4.54542	5.68763	4.55167	2.68756	2.98757	2.07192
Peak_417	Chr1	2291335	2291818	2.24153	1.9053	3.42343	4.10608	3.43701	3.82758	2.59814	2.94456	1.9053	1.92228	5.07061	4.74797	2.35021	3.65097	3.61022	3.64758	3.79702	3.68154	2.42832	4.32683	3.06682	3.06682	3.15173	2.79852	1.9053	3.03286	3.18908
Peak_418	Chr1	2299086	2299594	3.5201	3.21653	2.92588	4.14984	2.93234	4.05941	1.75036	2.91296	2.60293	2.52543	4.8474	4.03681	2.35427	3.62344	2.30582	4.24349	3.17778	3.33602	3.15194	3.33925	2.47053	3.9367	3.22945	2.20571	2.75149	2.67398	3.45874
Peak_419	Chr1	2301356	2302051	4.81564	4.33384	3.51431	7.39705	5.07307	4.91011	4.13545	3.36788	4.1449	2.14212	1.6863	2.90025	3.11517	1.46429	2.77035	4.27716	4.39288	3.49305	3.03723	2.65935	1.69338	4.18741	3.6135	3.6135	4.59599	3.25215	4.13309
Peak_420	Chr1	2305452	2306221	4.66238	3.59926	4.52789	5.55259	8.0695	7.09604	5.91337	7.06189	8.24456	5.32416	5.55259	5.56113	4.89934	3.99633	4.84597	6.62426	5.23451	5.05092	3.44128	3.74442	2.98444	4.197	3.215	4.10093	3.48398	4.2461	4.20553
Peak_421	Chr1	2309830	2310843	2.32141	3.52264	3.72852	2.66021	2.64562	3.01685	2.29385	1.12504	1.57084	1.48168	1.56922	1.40387	1.48816	1.66486	0.992109	2.46406	1.77348	1.55463	1.55139	2.14471	1.35037	2.56133	3.02658	2.76559	1.74592	2.51756	1.65351
Peak_422	Chr1	2311001	2312160	4.15765	4.13498	3.97485	4.6267	5.95165	5.57187	4.98947	5.48969	6.48729	4.75423	5.2913	5.24878	5.49252	4.87752	5.7986	6.21522	4.69755	5.28988	5.08157	3.53273	3.92525	5.5322	4.61253	4.87752	4.76273	4.40847	5.44717
Peak_423	Chr1	2315382	2316537	8.26729	8.6242	8.90149	7.59186	8.85598	9.36362	6.80125	10.6932	9.12188	7.85207	10.2609	7.69139	9.09487	9.19867	7.98432	8.64553	8.56306	7.94308	8.22889	6.15283	6.10164	8.33555	9.37784	10.0319	7.83359	8.14358	8.41233
Peak_424	Chr1	2332500	2333600	3.198	2.89343	2.58886	3.27414	5.40315	4.68651	1.278	1.90357	1.811	1.01822	1.67514	1.70351	0.913714	0.989856	1.14214	0.965969	1.67514	0.913714	1.98718	1.599	1.37356	2.55452	2.26935	1.84086	2.93523	4.5611	3.47719
Peak_425	Chr1	2337869	2338503	3.99946	3.52573	2.16152	3.30052	4.90548	3.18403	3.82602	3.08049	3.98651	4.32562	5.72349	4.45246	4.45506	4.35668	3.60857	4.35669	4.12889	4.29197	4.52495	3.21768	4.15218	4.3774	2.98988	3.22545	3.66293	5.07374	4.22466
Peak_426	Chr1	2338662	2339353	2.28515	3.33509	3.73653	2.37542	4.00258	3.47998	2.86238	3.76979	3.18543	0.672243	1.83857	1.30173	0.121146	0.807641	0.363439	0.959669	0.96917	1.09032	1.44663	1.45375	1.78631	2.81012	2.08324	2.88851	2.24239	3.02866	3.02153
Peak_427	Chr1	2343668	2344455	4.97935	5.31937	6.04739	5.71988	6.06407	5.34648	4.8959	6.06825	5.55926	4.58091	3.82994	4.7916	5.47791	6.74829	5.66564	5.35274	4.63307	5.24636	5.96812	5.05861	5.76577	4.05106	6.04322	5.66356	5.52797	6.94021	4.96265
Peak_428	Chr1	2346223	2346717	3.33075	2.02236	1.96591	2.62674	2.64334	3.21784	1.47443	1.80651	1.28514	1.18552	1.0859	1.01616	0.67744	0.67744	0.67744	1.01616	1.01616	0.67744	0.97299	1.12242	0.315474	2.5404	1.86296	1.86296	1.80983	3.16139	2.34115
Peak_429	Chr1	2348971	2350527	10.0517	9.65898	8.75104	11.2721	9.66847	9.53228	10.0528	12.3838	11.7493	12.3944	11.4843	12.595	10.4107	10.4941	12.1336	10.9048	12.9402	12.5221	12.0914	11.6079	12.3986	11.8887	11.8296	12.4905	8.3129	10.3167	9.38975
Peak_430	Chr1	2365804	2366602	3.88831	4.1105	5.04658	7.25201	6.18221	7.76427	5.02806	4.72152	5.13298	4.82438	5.98059	4.7318	5.1515	6.41468	5.70491	4.97046	6.41674	4.37178	5.06715	3.74018	3.8986	4.6166	5.37163	5.03835	4.75238	5.62879	4.87993
Peak_431	Chr1	2368789	2369676	5.60517	4.68147	4.10392	6.00131	6.27527	5.83286	6.44743	5.78843	5.62183	4.40935	6.64549	5.92356	4.34271	4.82215	5.0739	4.83326	5.4071	6.07536	3.96508	3.17281	3.87808	6.08276	6.08091	6.58256	3.88548	4.34271	4.17796
Peak_432	Chr1	2373838	2374689	3.7429	4.05738	5.31337	4.8214	6.14684	6.28961	5.51402	6.88578	5.41177	5.22848	6.40537	5.73203	4.8812	5.14359	5.89603	3.41491	4.8214	4.89664	2.83032	6.16999	3.47858	5.69924	4.75387	4.55129	4.04773	3.37247	3.26056
Peak_433	Chr1	2379543	2380272	5.45152	4.69943	5.25562	7.79111	8.05006	5.94466	8.87871	7.09081	8.8089	6.27116	5.72849	6.52561	4.29862	4.50353	3.88429	5.28264	4.55532	4.47876	4.25809	4.18828	5.51232	5.41775	5.45378	5.96493	5.00567	4.99892	5.11601
Peak_434	Chr1	2381564	2382317	2.01222	3.44672	3.73232	5.40663	3.88492	2.88862	5.44805	3.59061	5.44804	3.18075	5.21696	4.13999	3.22218	4.77658	4.51715	3.22436	3.54919	3.79118	4.71117	2.98236	2.94312	2.28038	4.05715	2.9453	2.8254	1.77895	3.23743
Peak_435	Chr1	2390901	2392433	4.3191	3.74544	3.71863	3.30795	3.36263	3.71327	4.27835	3.82907	3.96739	3.48916	4.41667	4.35448	4.85095	4.60325	4.78553	7.25176	7.41903	7.02229	4.87989	4.68796	3.50632	3.6929	4.15612	4.57752	5.30237	4.96675	4.8102
Peak_436	Chr1	2395339	2396791	8.76989	8.78347	7.05257	8.58549	7.73135	8.33094	9.46225	9.38193	9.14548	10.6264	10.1512	10.227	10.5483	10.5076	10.296	9.03688	10.2496	8.84456	8.78007	9.93174	10.1094	10.5325	11.8855	10.2847	6.46202	8.84343	7.26977
Peak_437	Chr1	2399673	2400639	4.16132	4.33471	4.33471	5.01636	5.75241	5.67591	6.33547	6.67545	5.39203	6.76044	7.66308	6.82843	6.65165	7.93336	5.7881	6.33207	7.85347	6.90323	6.94233	7.07492	5.44643	7.4489	7.74128	7.13782	5.56712	5.46173	4.83617
Peak_438	Chr1	2402234	2403027	4.89617	5.2005	5.2212	5.4096	4.75953	5.38475	6.9064	6.60207	6.44058	3.801	4.85683	5.17358	4.86719	6.32051	4.96242	4.96656	4.85684	4.48212	6.8712	5.29987	4.11775	6.83394	6.53582	6.71386	5.93544	5.12183	5.3537
Peak_439	Chr1	2405150	2406008	2.92782	2.34226	2.23892	3.63394	3.65882	3.21103	3.389	4.00135	3.36603	4.99643	3.36986	4.81081	3.94203	4.36876	4.75914	2.53744	3.32585	3.77746	4.14678	4.79167	3.70474	5.42316	5.1189	4.29414	3.99752	2.73263	3.90376
Peak_440	Chr1	2408941	2409207	2.66577	2.70887	2.49954	0.326295	3.37992	3.07825	4.79592	2.77043	4.83902	0.523303	2.67808	1.50834	1.24362	1.25593	2.41951	1.84695	1.70535	2.18556	1.9393	1.50834	1.97624	1.88389	2.01934	1.78539	1.21283	1.89621	0.769564
Peak_441	Chr1	2412845	2413950	6.59448	6.36708	5.03838	5.73245	6.69702	6.30317	8.37203	7.28855	8.17287	7.30341	5.76069	7.73888	6.78026	6.89172	6.57069	6.86943	7.53676	6.39235	6.22291	6.31654	5.68192	6.6138	7.21573	6.60042	6.36708	5.00271	5.60909
Peak_442	Chr1	2416162	2416921	3.54496	5.29473	4.65236	3.94509	3.86723	4.30197	4.4577	5.19091	4.34955	3.99484	4.89676	6.58164	5.30771	4.68696	4.60477	4.06189	4.26736	4.12245	6.08201	4.60261	4.41227	5.56076	4.85567	4.78429	4.04242	4.50528	5.05032
Peak_443	Chr1	2421078	2422939	5.07085	4.41051	4.47231	4.34342	4.99757	5.51931	5.29067	5.2889	5.17678	6.34474	7.52152	7.32465	6.09844	7.11278	6.4957	6.25823	6.68727	5.67293	5.52108	6.41978	6.47628	6.80292	7.15604	6.15317	4.0618	4.77864	4.51644
Peak_444	Chr1	2423957	2424651	3.98057	4.47016	4.34717	5.36419	5.8183	5.30742	5.56523	6.77856	7.53541	4.8273	4.58368	4.25256	4.78473	5.11348	4.73269	5.30743	4.51983	5.06618	4.13667	4.07044	4.18634	6.53731	5.3973	4.62153	3.79845	4.52929	4.52219
Peak_445	Chr1	2431085	2432126	5.14907	6.72818	7.83087	8.27574	10.4054	9.95265	9.23014	7.8356	9.42575	7.60528	7.11624	6.47734	8.25365	8.68431	5.95203	7.72991	7.56111	6.47735	5.74537	5.65387	5.22952	7.14307	8.64961	8.08012	4.78781	4.1568	5.4693
Peak_446	Chr1	2437368	2439377	6.16952	6.71173	8.01449	8.4651	8.95415	8.34488	8.63357	8.44057	8.21649	6.99305	8.12653	6.63158	9.61003	9.9257	9.59285	11.2326	12.4241	11.5687	7.21304	7.60559	6.75997	6.44758	7.07483	7.23022	6.98569	6.63158	5.87756
Peak_447	Chr1	2443780	2444560	3.50436	3.45806	4.08106	4.20734	4.02633	3.54225	2.91925	3.19918	3.2981	5.13342	2.09209	2.86874	3.54014	5.67012	4.92294	3.44122	4.48727	4.02002	3.97161	3.69379	3.85375	3.16971	2.87505	2.03316	3.22022	2.87716	3.49805
Peak_448	Chr1	2445923	2446772	3.38427	4.34927	5.15956	6.83816	7.94046	7.26748	6.01627	6.52681	6.31215	5.76486	5.73585	6.68151	5.92538	7.36804	6.19805	4.58327	5.10928	4.94877	6.08975	4.6935	4.85788	4.63548	6.70859	4.86175	4.34347	4.60454	3.05745
Peak_449	Chr1	2454771	2455562	4.40627	5.18665	7.8246	4.77986	8.97649	6.08118	6.18496	5.70345	5.8342	4.99778	6.85534	6.50251	4.75703	8.1463	7.40327	3.62796	5.25722	4.90439	5.66401	4.80268	4.92099	7.35346	4.43948	6.45893	3.70475	5.2925	4.234
Peak_450	Chr1	2458150	2459043	5.01962	7.78318	7.59563	7.77582	8.86248	8.43039	7.03299	8.13804	8.03139	6.49976	9.29089	7.15434	6.92083	7.09734	9.11806	4.39447	6.56412	7.18008	5.72384	6.36922	8.15826	9.09048	7.82914	9.93996	4.40734	6.56412	5.15201
Peak_451	Chr1	2464753	2465589	5.50876	5.67372	6.12935	5.99777	6.58301	6.92669	6.39448	6.801	5.90939	5.25541	7.80063	5.80923	6.20594	6.43768	5.64033	5.49108	5.98795	5.25345	5.18078	5.03349	4.43253	8.31518	7.96953	7.11327	4.10652	5.7346	4.407
Peak_452	Chr1	2466383	2467751	5.35642	5.73345	5.70463	5.96039	8.14449	6.30499	6.4779	8.08326	7.24275	7.1491	8.13969	8.00641	6.59077	6.54994	7.09146	5.22915	6.15971	5.88954	5.79228	5.55814	5.62898	8.52873	6.90896	7.42647	4.57115	6.71924	4.87853
Peak_453	Chr1	2471983	2472732	7.09021	6.64748	7.03542	6.96528	10.1871	8.24962	8.04799	7.12309	6.93021	6.77241	8.63317	6.87542	6.76364	9.71807	7.71046	6.09955	6.28366	6.84035	7.58334	8.83919	8.38332	7.15377	8.51044	5.8212	6.14777	7.60088	6.8535
Peak_454	Chr1	2474156	2475029	6.93814	7.00209	7.1375	6.37391	7.56443	7.34438	8.53679	7.00209	6.1012	7.41209	9.54864	7.77508	7.66412	7.41585	8.92423	8.36376	7.70362	8.06848	7.06415	7.55315	7.49484	9.32483	8.42959	9.6709	6.17455	4.60035	5.16646
Peak_455	Chr1	2477034	2477955	5.63738	4.61937	5.23267	6.9032	7.05474	6.92459	6.93173	7.1421	6.9959	7.09396	10.2835	8.43466	7.82672	7.24372	7.71083	6.7374	8.64505	7.6627	7.51115	6.5288	5.27724	8.74845	9.15494	8.17616	4.85648	7.32039	6.55554
Peak_456	Chr1	2484238	2485095	3.36038	3.53472	4.10372	4.42559	3.68032	4.69188	4.79726	4.9716	4.82216	3.59219	4.05008	3.54238	3.33547	5.70153	4.7417	4.60567	3.90639	4.10181	4.44857	4.11522	4.37577	5.13636	5.40841	5.72644	4.55394	3.76079	3.77228
Peak_457	Chr1	2487089	2488137	5.14761	4.73549	6.64567	7.65326	6.13482	6.0455	6.10035	7.15025	5.55503	5.59421	7.73473	6.09565	5.74464	6.15363	5.40773	5.86844	5.77755	5.43908	6.31189	5.414	4.27636	6.44196	5.43438	5.9938	4.05854	5.88411	4.92353
Peak_458	Chr1	2492371	2493313	4.44154	4.67512	5.26605	6.09405	4.832	5.49789	8.16316	8.87785	8.30784	6.40258	6.83488	5.86395	5.11265	6.48974	6.66754	6.53506	6.3102	5.77679	5.20155	6.56644	6.78259	6.33809	6.4113	6.98828	4.16961	5.60074	4.67512
Peak_459	Chr1	2497830	2498723	2.92536	3.75093	4.08373	4.01386	4.38895	4.84862	4.98837	4.76956	6.11732	3.93847	4.47537	3.8686	4.38528	4.01018	5.13546	5.12259	3.18829	4.15912	3.87044	4.50663	3.63325	5.31749	4.87621	4.82656	3.92008	2.75436	4.53788
Peak_460	Chr1	2500693	2501444	1.51482	1.85801	1.34651	3.42747	1.89516	2.22961	2.93565	3.23293	3.27009	2.25802	3.24604	3.08866	3.34441	2.64492	2.72362	3.69634	3.03401	2.57716	4.24062	3.26353	3.2985	2.08534	2.00665	1.83178	2.11813	1.44924	1.68313
Peak_461	Chr1	2510379	2511175	4.56425	4.73337	5.04893	5.93785	7.39808	7.76932	8.13851	7.59814	8.74074	6.71746	8.31175	6.45759	8.18801	7.94876	8.42519	7.21865	7.33208	6.88246	7.15264	7.67857	6.19153	6.89484	7.65795	8.90162	6.29259	6.94228	4.52299
Peak_462	Chr1	2515818	2516599	2.15248	1.17924	2.13566	3.92029	4.00227	2.86507	1.93177	2.35848	2.36268	3.06266	3.1047	1.98642	4.42057	4.10737	3.49568	3.45994	3.75213	3.37376	4.42057	3.68906	2.31223	3.42211	4.48153	3.35484	3.36325	2.03687	2.84615
Peak_463	Chr1	2535250	2536079	4.45209	6.17708	6.92966	7.81097	9.24482	8.08031	8.44076	7.47429	6.06023	7.0564	8.78733	6.46424	6.49792	8.34173	7.34357	8.5477	7.61688	7.73571	5.51758	7.18513	6.83063	8.47839	6.57516	7.16335	4.92146	5.20467	4.81254
Peak_464	Chr1	2541780	2542401	3.50428	2.94666	3.0233	3.78177	3.62056	3.55449	3.94562	4.29446	4.14118	2.9493	3.03651	3.51749	3.14751	5.24585	4.31296	2.77224	3.21094	3.4435	3.77384	5.38063	2.32297	5.12693	7.28341	5.00008	3.3695	4.40017	3.3695
Peak_465	Chr1	2546994	2547880	3.06149	3.77868	4.15858	3.93805	4.24568	3.83242	4.19009	4.51069	4.67748	4.49586	5.87835	4.87577	6.1934	5.1556	5.05553	5.06665	5.56701	4.53664	4.63856	5.57628	5.12966	4.17711	5.07962	5.10742	4.07519	4.11225	5.22046
Peak_466	Chr1	2564440	2565146	2.61797	3.08298	4.28501	5.08249	4.60121	4.56634	3.64796	3.66423	4.48961	2.82257	2.31572	3.78745	3.87348	3.60378	3.26433	3.49218	4.50589	2.94813	2.33199	3.77118	3.5503	3.19458	3.32013	4.38499	4.99414	3.22015	3.28293
Peak_467	Chr1	2567386	2568289	6.46424	10.0118	10.2009	7.78618	10.5592	8.63352	9.80273	9.50452	10.07	7.81527	9.9791	9.38086	10.1828	9.92273	8.32077	9.81364	9.1263	9.38814	8.22076	9.00083	8.47896	9.46633	11.0938	8.54079	8.34986	7.71708	7.60252
Peak_468	Chr1	2575467	2576824	6.45169	7.35953	7.82676	7.61735	8.68859	9.31318	10.0007	9.75379	10.0625	5.62374	7.82675	7.91391	8.64381	9.50686	9.56133	7.30385	8.42956	8.35451	5.55595	7.8316	6.15997	7.5072	8.99605	8.14269	5.98808	5.80289	5.52811
Peak_469	Chr1	2579934	2580790	5.20949	6.6116	7.29635	5.8156	7.18318	6.29895	7.72984	7.25032	8.8519	5.47801	6.95301	5.49719	5.90575	6.75929	7.21195	5.85971	5.79258	7.047	6.26826	5.24785	4.66475	6.08988	8.23237	6.14167	4.65324	5.57584	4.9774
Peak_470	Chr1	2582693	2583405	3.56193	2.8311	3.45357	4.44261	5.88813	5.71522	5.57689	5.8328	5.73827	2.59825	4.62013	3.31524	3.18153	5.8789	4.24203	4.2259	2.78499	2.77577	5.58842	4.86681	4.85989	4.45644	7.28985	5.7083	3.67489	3.92158	4.18901
Peak_471	Chr1	2586211	2586698	2.47242	3.0181	1.77516	1.8021	1.37431	2.66779	2.20632	3.46947	2.18947	1.93684	2.14905	2.67789	2.29726	3.08547	1.79873	3.18316	2.96084	3.0181	1.39116	5.01894	2.21305	3.09221	1.65389	2.76884	2.90694	2.752	1.96716
Peak_472	Chr1	2588926	2590422	9.7716	12.139	11.7887	11.2046	11.1255	9.92971	9.56077	9.8254	9.81661	11.3078	9.91983	10.1164	11.9018	12.7616	11.5373	13.1668	12.464	14.0913	7.78411	9.46084	11.0607	9.39826	11.6174	10.9026	9.94508	9.40814	8.59118
Peak_473	Chr1	2590775	2591236	1.63311	2.34827	1.7612	2.86774	1.60465	2.88197	1.45877	1.99603	1.81457	3.69674	1.45166	2.50482	3.29825	2.35894	2.73609	2.72186	2.50482	3.67896	1.83592	2.81436	3.2093	1.66869	1.8039	2.35539	2.14546	1.61177	1.17413
Peak_474	Chr1	2606942	2607581	1.83385	1.44088	0.798779	3.05128	1.96484	2.4888	2.44	2.3424	1.72341	3.11549	3.1309	3.10265	3.51617	4.95705	2.18572	3.86547	3.20539	3.88345	4.19166	4.25587	2.88177	1.67461	3.08467	2.684	2.98707	2.69941	3.18998
Peak_475	Chr1	2607869	2608959	4.79275	7.06784	6.44407	7.11304	6.98195	6.03877	7.53039	8.35605	8.14812	6.46366	8.50822	7.20193	6.93224	8.5037	8.27017	7.41739	7.12359	8.07581	5.55061	7.11605	6.429	7.09195	7.34959	7.00456	5.37885	5.68621	5.01875
Peak_476	Chr1	2614893	2615707	6.4017	5.69578	5.41341	5.38114	5.96806	5.08465	4.61269	6.76475	5.246	4.41907	5.17541	6.39766	5.82688	4.46949	4.87287	3.8261	4.47353	4.33234	5.92974	4.16897	4.25368	6.37145	6.27867	6.06689	5.14314	5.96605	5.14314
Peak_477	Chr1	2620366	2621661	7.52515	6.43056	5.86234	6.87576	7.35899	6.57388	8.08577	7.9564	8.21513	8.30138	9.29704	9.467	8.98376	10.3866	9.22094	8.89878	8.10352	7.64311	7.77755	8.61593	8.85312	7.06855	9.58877	9.33383	9.27294	9.40359	8.99137
Peak_478	Chr1	2635143	2636648	4.06363	4.90299	5.51532	6.01195	6.49656	7.37849	6.54459	7.06633	6.44745	4.34196	6.57406	5.74343	5.39307	5.86568	5.57534	4.30922	4.87133	4.67923	4.28847	3.86388	5.15184	5.33631	5.39853	6.06761	2.93611	4.07345	3.88353
Peak_479	Chr1	2638090	2639100	6.71661	6.01097	6.52963	7.77507	8.3295	6.87107	7.37998	8.01245	8.39941	7.89376	9.25301	8.87906	7.13772	6.79953	7.08243	5.46629	7.13121	6.53288	8.57664	8.22382	7.35071	8.80915	8.20919	8.20919	5.26467	5.62075	4.62082
Peak_480	Chr1	2640051	2642946	4.37114	5.90538	7.90279	7.2455	6.81638	6.2641	8.11961	8.64238	8.06171	8.68438	5.12378	7.80686	7.22847	7.64963	6.74487	6.3396	6.49853	6.22381	5.00969	6.77381	7.52476	4.47728	4.51815	4.62202	4.57377	4.31324	4.3876
Peak_481	Chr1	2645186	2646859	5.18176	5.68256	5.60891	5.09928	5.74933	6.22263	6.19612	6.01741	6.24718	6.90411	6.81082	6.52998	7.36759	5.7022	7.34598	6.12542	6.02428	5.87306	5.00796	5.2122	5.68747	5.39092	5.05509	5.15525	5.05214	4.50716	5.04232
Peak_482	Chr1	2649573	2650714	6.39379	7.09622	7.38266	6.25993	9.215	7.41432	7.99296	10.1305	8.27939	8.22326	11.4964	12.9718	8.82637	9.85121	9.92318	8.62341	8.29523	8.21319	9.16318	8.29667	9.2697	10.653	10.9567	10.4241	8.43197	8.18728	8.26644
Peak_483	Chr1	2671035	2671918	4.51298	4.41815	4.63571	6.98238	5.46132	5.22702	5.87413	7.81729	6.03218	6.4766	5.95594	5.90388	5.84438	6.10842	5.69375	4.5074	5.08756	5.16752	4.82909	3.45307	3.63344	5.58591	5.86297	6.03033	4.07786	4.64686	3.88819
Peak_484	Chr1	2672345	2673818	3.70243	4.5009	3.79945	5.57818	5.22689	4.77078	5.34622	5.53468	5.80456	4.58677	5.13321	4.25221	5.55253	7.05245	5.29491	6.00641	6.95209	5.93727	4.92802	5.56368	5.84024	4.66149	6.03763	4.37823	4.15854	3.92435	3.66228
Peak_485	Chr1	2675945	2676361	1.79358	2.02222	1.63591	1.63985	2.81454	3.06289	1.80935	1.60831	2.17989	1.2693	2.6135	2.14836	1.80935	1.59254	1.20623	1.20623	2.03404	1.40727	1.60831	3.21662	3.01164	1.80935	1.494	2.21143	1.74234	1.63985	1.67138
Peak_486	Chr1	2683160	2684973	5.7741	6.28156	6.23353	5.62277	8.47629	7.64805	8.20354	7.81932	7.68521	7.39886	9.55282	8.80795	7.28559	7.82929	8.79073	6.3314	8.54335	7.16598	7.38889	7.03367	7.35174	9.29275	8.42918	8.624	5.4651	7.93713	6.10213
Peak_487	Chr1	2687797	2688722	6.46865	7.44853	7.26746	11.5864	7.02249	9.01776	7.34557	6.97989	7.35267	7.04734	8.47811	7.13787	7.18048	7.52841	7.71302	5.54379	7.84971	6.33196	6.73669	6.37278	5.67693	7.658	7.18048	7.3367	5.06982	6.11717	5.97515
Peak_488	Chr1	2692653	2694377	5.24869	5.49168	6.33121	6.72953	6.20923	6.22448	6.04057	7.0621	7.28698	5.55267	8.44002	7.84254	6.71714	6.9992	6.61041	5.91573	6.76765	6.02627	6.94203	6.13871	5.65749	7.50711	7.47567	6.30357	5.15149	6.53704	6.3312
Peak_489	Chr1	2696346	2697491	9.50988	9.46111	11.0762	10.9356	10.6287	10.7865	12.3901	12.7932	11.6456	10.3432	12.8993	11.9254	10.0033	11.6987	13.1317	10.9729	11.224	10.7191	9.89428	12.3155	9.63466	13.0686	12.3126	13.0786	8.33943	9.15846	8.51012
Peak_490	Chr1	2701074	2701883	4.34285	4.24341	6.0394	3.61025	5.99272	4.16629	7.3524	5.9907	6.37018	6.02519	4.74669	6.6888	8.47465	7.39502	6.76185	6.40063	6.38237	5.97446	6.4473	6.05969	5.55032	6.30322	7.89019	8.45232	5.08762	5.09169	4.57419
Peak_491	Chr1	2703220	2704232	5.65509	6.07861	6.08835	8.97187	6.70334	8.20433	8.56782	7.59096	8.37959	5.71026	9.1601	7.76458	7.95769	8.20758	9.45705	7.86844	6.56704	6.60923	6.50375	5.93743	6.91916	8.89885	9.0952	6.95162	6.50051	5.35002	5.99585
Peak_492	Chr1	2706886	2708036	2.62206	2.11222	3.16333	3.37184	4.62574	4.29727	6.04532	6.48233	6.40092	6.60229	6.48232	5.66543	6.90791	7.43203	7.71195	6.13386	6.55516	6.27953	5.28697	5.18129	6.48232	7.42347	6.29096	7.4606	4.58861	3.34185	4.3701
Peak_493	Chr1	2712815	2714577	7.8087	11.018	12.1583	9.03105	9.35738	8.19097	7.84599	7.9355	7.75088	5.84696	6.85487	7.29402	6.60499	7.65205	7.48143	7.96068	7.9327	8.36906	6.50615	5.86934	6.32434	9.03478	8.77558	8.44272	6.55744	6.93226	6.05861
Peak_494	Chr1	2715725	2716541	5.51283	5.74622	7.79844	7.90709	6.81458	7.11436	5.05611	6.05003	5.87699	4.78449	6.36792	6.32164	4.65371	6.66167	6.9031	4.72011	3.85697	4.81065	5.71402	4.66779	3.79862	6.13252	6.41621	6.23915	4.67383	4.30966	5.13055
Peak_495	Chr1	2721043	2722059	7.34614	6.87256	7.04227	7.84719	9.26469	8.36764	9.14994	9.8789	10.0939	10.3735	10.2393	10.7937	9.14348	10.7242	12.271	10.1133	10.7986	11.3772	8.69252	8.07832	10.5125	10.3719	9.81748	9.50553	6.3327	6.92266	7.7292
Peak_496	Chr1	2723687	2724413	3.3735	3.45037	3.57021	3.53177	3.35767	2.34698	5.07381	4.38193	5.15747	4.12191	4.36384	4.58994	4.7437	4.09025	5.02633	3.73301	3.9365	3.52499	4.38193	3.55438	3.45942	4.61256	3.12704	3.78049	3.62447	3.82571	2.89867
Peak_497	Chr1	2735230	2735849	2.93496	3.39363	3.4334	4.1625	3.95304	3.30083	3.93714	2.3888	4.31627	3.38037	2.79709	2.96942	2.59029	2.83951	2.95352	3.10994	2.37289	3.20539	2.56908	2.70695	1.74984	3.95835	2.7096	3.35386	1.83998	1.53244	2.48689
Peak_498	Chr1	2736705	2737517	3.80518	3.21883	2.08658	3.13796	2.87107	3.45944	3.24916	2.38986	3.05102	2.78413	4.18933	3.52009	4.31267	3.25725	2.97418	4.54923	4.13475	5.19826	2.47478	2.13308	1.73275	3.74857	3.11774	2.88725	2.34336	2.91353	1.56898
Peak_499	Chr1	2750529	2751378	6.37983	6.56935	6.80529	8.16093	7.79929	7.954	9.855	10.6827	9.75636	8.09324	8.80877	6.3779	7.62718	8.60958	8.04102	6.28121	4.62001	6.66025	7.13404	6.80141	7.42799	6.65251	6.62737	6.61963	5.81901	5.91571	6.31215
Peak_500	Chr1	2752055	2753488	6.89497	9.89024	11.3415	11.1661	9.43172	9.27926	10.0393	11.5753	10.9735	11.9948	10.2972	11.1271	12.662	11.1133	12.4339	13.9103	12.5095	13.1068	12.3158	14.59	13.1629	9.24144	8.54564	9.63347	7.19071	6.74595	7.83378
Peak_501	Chr1	2759050	2759892	5.97458	5.62164	5.82053	6.05648	8.17409	7.21083	8.95212	8.31644	9.68723	6.45816	8.34763	7.44287	8.56798	8.83512	8.65377	7.72561	7.19328	8.62648	5.88488	6.40161	6.7292	8.48803	8.72593	9.09446	6.56345	5.96678	7.93815
Peak_502	Chr1	2762511	2763384	4.57778	5.82097	6.4924	6.72186	7.70361	8.63271	5.08371	6.42658	6.61841	5.99776	6.86479	5.36018	7.1864	6.63157	6.26671	5.05738	5.37147	5.38839	5.39779	6.06358	5.46738	4.47058	7.28985	5.65922	4.86554	6.36827	4.70003
Peak_503	Chr1	2770582	2772417	8.29773	8.70957	9.1438	10.0311	9.74365	9.55743	9.79738	10.4313	9.72127	9.59772	11.6614	10.5763	9.64965	10.9004	10.4483	9.58877	9.28078	9.51267	10.1421	9.05247	8.3989	11.3346	11.1412	10.4563	8.26639	9.37479	8.48485
Peak_504	Chr1	2773892	2774951	6.10373	8.07783	9.9992	6.08977	8.41123	8.09178	8.32284	10.0442	8.55855	9.78519	11.0351	9.49985	8.44845	11.1576	9.54327	7.59244	10.4799	9.64873	7.53196	7.57228	6.86824	7.90569	9.45179	8.80358	7.35517	8.46241	7.00316
Peak_505	Chr1	2800928	2801710	6.4261	5.41842	5.56747	6.84807	5.73331	5.58216	5.4667	5.99574	6.77879	5.56747	7.76338	6.22666	8.11608	7.64792	7.31832	4.03495	6.25396	7.03701	5.21687	6.4324	6.02512	6.7452	6.81028	6.51637	4.91037	5.99574	5.1476
Peak_506	Chr1	2805113	2806019	5.04554	3.51774	3.43619	5.47507	5.50225	5.12891	7.94891	6.96662	6.20725	4.43841	5.33189	5.3047	6.37761	6.0677	6.90137	5.94628	6.14201	6.10032	4.99117	6.74189	6.18006	6.03327	5.92996	5.90097	6.25799	5.88466	4.81175
Peak_507	Chr1	2808780	2809699	6.23389	5.55851	5.83188	6.33931	6.30893	5.61568	4.89206	6.74311	5.43522	8.9908	10.6668	7.45243	8.15105	6.66806	7.42206	7.92413	8.62811	8.05099	5.88011	6.58944	6.3393	7.48639	7.99918	7.89197	5.83187	5.77113	6.95394
Peak_508	Chr1	2810638	2811249	2.14069	3.23117	2.56775	3.25803	3.84893	3.93757	2.7101	4.14708	3.69852	4.63054	3.73344	4.25988	4.50162	3.96174	3.81133	5.54644	4.59025	4.87765	3.2258	3.88654	4.10947	2.93572	4.28943	3.33861	4.38881	3.01361	3.01361
Peak_509	Chr1	2817049	2817854	2.1149	1.97622	2.33312	2.35147	2.98982	2.2597	3.26107	2.82666	3.38343	2.58193	2.896	2.48812	2.09858	3.01633	2.44733	2.57785	1.83754	2.27398	2.52075	2.16792	2.46364	3.38343	2.50851	2.48608	1.56017	1.68254	1.56017
Peak_510	Chr1	2824439	2825365	4.48806	5.94566	6.07688	5.91729	6.25774	5.6974	6.61949	7.17274	7.30218	4.97215	6.24356	6.84823	6.64609	7.3341	7.01314	5.33566	6.85887	5.03067	8.4867	7.38197	5.33921	7.19933	6.07333	6.83405	4.75581	6.5858	4.56076
Peak_511	Chr1	2826977	2828098	4.87862	4.93137	7.01467	6.78319	7.75745	7.74426	6.9546	7.75745	7.10403	6.18545	7.0176	7.01613	5.61408	5.97448	7.05276	6.04188	6.04334	7.69592	6.07264	5.84995	5.75033	8.3508	7.95231	8.17792	4.90939	6.0243	5.2317
Peak_512	Chr1	2838411	2839722	4.06813	4.54798	5.62547	4.87875	4.53796	4.8825	5.14561	5.52899	5.79586	4.12576	4.95016	5.04788	4.72339	5.81214	5.06668	3.55319	4.50538	3.67597	5.00528	5.43377	4.43397	5.10051	5.86978	4.86371	4.21972	4.29866	4.1245
Peak_513	Chr1	2846693	2847928	6.25065	7.14436	6.84912	8.23623	9.52626	7.61914	7.27204	7.46089	7.16431	9.17782	10.8748	9.35736	8.74959	8.88922	8.61659	8.75889	9.89465	8.2748	8.40114	8.14313	8.6392	9.49567	10.2338	9.69915	6.49004	6.91828	6.59111
Peak_514	Chr1	2848273	2849037	1.27206	1.09801	0.113883	1.39883	0.547929	1.31503	1.20545	1.3709	1.85436	3.37353	1.5342	1.12809	3.18229	3.44443	3.14576	2.08213	1.97255	1.64379	1.09586	4.27815	2.53981	1.09586	1.66313	1.30214	1.20544	1.30644	1.38164
Peak_515	Chr1	2852329	2853310	5.71978	5.3783	5.154	5.33646	7.08402	6.43454	5.55909	7.6314	6.24874	7.49413	6.79778	5.71978	6.81787	7.25978	6.61867	5.15232	5.03682	5.76163	5.11549	5.74991	7.22965	6.45631	5.74322	6.05289	5.60093	4.4543	4.5246
Peak_516	Chr1	2856163	2856932	2.51051	3.29612	3.15736	3.48398	4.32722	3.43701	4.6816	4.74137	3.91947	3.04848	3.84476	3.96857	3.31746	3.57364	2.86275	3.91734	2.87343	3.27904	3.31746	3.48398	3.26623	3.84903	3.48611	4.45958	2.16468	2.28636	1.9085
Peak_517	Chr1	2867303	2868497	1.96429	2.2903	2.87629	3.08675	2.34257	3.01246	3.78828	3.96985	4.48293	2.41135	1.7442	2.17475	2.49113	2.88866	3.17478	1.68368	2.1046	2.1046	2.26416	2.59567	2.42098	1.82399	1.87901	2.02757	2.27654	2.62043	2.5489
Peak_518	Chr1	2873427	2875554	5.68065	6.34805	6.75514	6.94207	9.81329	8.95895	6.28703	7.46503	6.83238	5.52693	5.37862	4.86339	6.14567	5.03024	5.27897	5.08431	4.97926	5.98809	5.84054	5.19941	4.49415	4.89352	4.65251	5.00089	4.56985	4.84331	4.29409
Peak_519	Chr1	2879507	2880604	7.23686	6.73385	7.71144	8.71298	12.0275	8.76088	10.6472	8.79382	9.40911	8.11265	9.74745	10.1921	11.7116	12.0305	10.993	10.4137	10.0319	9.74446	9.41959	9.49744	10.0678	9.99148	10.0484	10.0589	6.9075	6.03172	6.14399
Peak_520	Chr1	2882449	2883156	3.56154	4.88493	5.0846	3.62191	4.65972	4.61793	5.29356	4.24878	5.52805	3.67995	5.92042	5.62324	4.73866	5.51644	3.25507	4.05143	4.87565	3.74264	3.95856	4.52738	4.03053	4.1443	7.19274	6.2803	4.64115	4.97316	2.19404
Peak_521	Chr1	2884296	2885302	4.17069	4.65387	4.43513	6.58985	8.52746	6.9914	9.76969	8.5193	9.23264	7.99041	8.19935	10.0733	6.85429	8.4442	7.02405	7.8435	6.63882	7.47622	6.38416	5.91078	5.89119	8.06061	9.74031	9.85294	5.41454	5.08481	5.56798
Peak_522	Chr1	2891068	2891614	1.07282	1.83912	1.74296	2.27185	1.68586	1.73094	2.80075	2.14564	2.95401	3.03515	0.946605	1.8872	2.68956	2.69557	1.68586	2.98406	3.60912	3.07722	1.8842	2.33797	3.96072	1.78202	1.37934	0.91956	1.99238	1.54763	1.83912
Peak_523	Chr1	2898591	2899495	6.82036	6.17374	5.4799	5.85952	5.3691	7.37797	9.51763	8.21531	9.55758	7.7921	9.14346	9.09805	7.75396	8.20441	6.69503	8.01007	8.03368	8.06092	6.15376	8.84194	7.81753	8.24256	10.4312	7.49786	6.36446	5.49625	5.66153
Peak_524	Chr1	2904000	2904934	7.72669	6.34133	6.10399	9.62891	8.34552	9.32652	8.18906	8.36135	7.84271	8.05544	11.5839	10.893	8.93799	10.5677	8.77624	8.01853	10.2847	8.31564	8.27344	8.25586	5.55899	8.12577	10.9861	8.66373	8.48792	8.8202	8.42815
Peak_525	Chr1	2911320	2912087	1.63737	1.63737	1.85568	1.4747	0.764104	1.63737	2.074	3.24049	2.51063	2.29231	2.074	1.83214	1.71442	2.72894	1.41905	2.89589	3.0607	3.34537	2.29445	3.05642	2.24095	3.12063	2.89803	2.91944	1.94772	1.0081	1.83428
Peak_526	Chr1	2916948	2917630	0.921773	0.859199	0.736456	2.19733	1.31166	1.40071	3.7978	2.09866	2.20937	1.45606	1.45847	1.96388	2.05534	2.86881	1.92778	2.62573	1.27315	2.4717	1.22743	2.33692	2.87121	1.94944	1.23224	1.69914	0.736455	0.589646	0.859198
Peak_527	Chr1	2925095	2925890	5.05527	6.52972	6.5607	6.16834	6.34799	5.83173	7.16163	7.14098	6.41614	5.16058	5.7037	5.11928	5.19569	4.59269	3.9009	4.26848	5.76359	5.68718	3.07694	4.41716	3.99589	2.78577	3.40322	3.31236	4.78887	4.99745	4.83637
Peak_528	Chr1	2927648	2929043	6.83892	8.60752	10.2831	10.1394	7.85627	8.1895	10.9213	9.83565	11.2722	6.53983	7.46652	7.49478	8.1377	7.63019	8.87834	9.17272	9.31402	10.143	5.84746	4.62404	4.52748	5.58488	4.55221	5.69321	8.16242	6.02291	7.48536
Peak_529	Chr1	2938822	2939388	2.48743	1.48724	2.80923	4.78641	3.93117	3.56009	3.69635	3.10493	2.78023	2.59759	2.73095	4.14861	3.76013	4.63855	2.70486	3.24119	2.68167	3.65576	3.67316	3.46152	2.75994	2.51352	3.49341	3.48472	3.78332	3.42963	4.02685
Peak_530	Chr1	2941466	2942419	7.83298	9.56982	9.39234	9.91098	11.1309	10.9793	8.78755	10.9913	9.21486	12.3853	13.1537	11.7667	11.1292	12.5559	11.9269	11.2136	11.2618	10.8449	10.8862	10.5382	10.7208	11.3738	13.8637	12.1544	10.0178	10.5571	8.92883
Peak_531	Chr1	2945171	2946885	6.26748	5.86876	6.08537	7.27964	7.11861	7.93811	6.93458	6.51956	6.89528	5.49399	7.23842	5.23328	6.70743	8.03395	7.58251	5.40677	6.65854	5.85151	5.51028	6.49176	6.46493	6.35758	7.52597	7.54705	4.83456	5.18153	4.88823
Peak_532	Chr1	2953104	2953890	2.67977	1.70436	1.49132	2.70275	1.90905	1.96336	3.35233	3.04738	2.80927	4.57838	0.440711	2.48344	1.70436	2.36229	2.04272	1.92576	0.875156	1.21143	1.28662	2.29337	3.97684	1.37853	0.745658	0.85218	2.17222	1.82759	1.35137
Peak_533	Chr1	2954870	2955799	4.97909	7.17788	7.94498	9.94227	10.4089	9.23349	8.11289	9.80441	9.98469	5.9088	7.64626	7.91846	6.56809	6.72185	7.16904	5.94946	6.56632	6.80493	5.32552	5.74972	4.68038	7.59324	8.02275	6.94103	4.86773	6.85089	5.31845
Peak_534	Chr1	2964972	2965608	2.76373	2.78696	2.89534	4.46687	4.4901	3.24113	4.60622	4.76363	3.94819	2.3844	2.23731	1.94055	1.93797	1.94313	2.00764	3.64111	3.42176	3.0063	2.8205	3.50176	3.44241	1.91474	1.36251	1.44767	2.1857	2.21666	2.63212
Peak_535	Chr1	2967052	2967773	4.52839	2.36095	1.54817	1.97391	2.4247	2.84362	3.1191	3.01893	2.83679	3.59038	3.69738	4.05711	4.29161	4.78793	3.38547	4.69003	5.93312	4.40772	4.12996	2.72523	3.33083	3.93417	2.85956	3.92734	3.79756	3.12821	4.29616
Peak_536	Chr1	2970860	2972269	4.85559	3.70727	3.76672	6.40495	5.74626	5.38486	5.55974	5.22282	6.18111	7.22917	6.64044	6.1986	5.36155	5.42683	6.12981	4.87541	6.34083	5.55391	6.00624	5.33473	5.62269	6.18578	5.73811	5.18085	4.24703	5.24147	5.06193
Peak_537	Chr1	2975709	2976863	2.58737	3.74442	5.7739	5.49495	5.63727	5.86355	7.21986	5.24589	7.15154	5.31278	5.71412	5.95179	5.9518	7.35506	6.52392	4.86305	6.09696	4.84313	3.7245	5.21031	5.73262	4.34074	4.16569	4.75774	2.90331	4.41048	3.37581
Peak_538	Chr1	2981961	2982702	5.40102	4.74528	4.41962	5.94378	6.75238	4.87155	6.71694	7.9243	8.28097	5.80643	6.50869	6.42894	5.87067	6.90302	5.25259	6.59731	4.85383	6.08113	5.42096	6.00138	5.66021	5.95043	6.09443	5.20607	5.52951	5.26367	4.87155
Peak_539	Chr1	2989256	2990308	8.06908	8.75439	10.0344	8.55769	10.8181	10.751	10.1937	10.4153	10.7556	7.94888	8.30948	8.41095	8.20021	8.41563	8.5171	11.0413	9.98918	9.26329	9.0463	11.0991	11.6751	9.02445	9.54584	8.33602	8.90892	8.7981	8.28919
Peak_540	Chr1	2994271	2995242	9.70208	9.26407	8.73474	8.18343	9.74096	9.22348	9.47715	10.0048	9.30803	9.13723	12.7241	11.7348	6.39759	10.8284	8.38467	9.16598	10.179	8.64342	8.68569	9.85427	8.52842	11.8431	13.6746	12.7495	5.81414	9.96082	8.20372
Peak_541	Chr1	3000717	3001435	5.23543	4.39868	2.68173	6.55915	7.6291	6.43569	5.47777	7.78914	6.48142	6.75119	7.12613	6.45398	5.27887	6.71461	6.01274	8.28524	8.86137	7.08498	5.66295	5.30402	4.74389	6.82207	7.25645	6.68718	4.31409	4.81248	4.95651
Peak_542	Chr1	3003182	3004417	4.16134	3.773	3.96185	4.64543	4.74783	5.82773	5.44206	4.99387	4.93402	6.0086	5.80778	6.26395	5.78252	5.72001	4.81566	5.28513	3.21842	5.1641	4.86886	4.77443	5.5019	4.94866	5.08697	3.89136	3.50834	3.48175	4.03499
Peak_543	Chr1	3009074	3009901	2.62252	2.73369	2.12621	2.83494	3.14265	3.48809	2.12621	2.44583	2.18378	2.28701	3.53573	1.72121	2.88259	2.41605	3.28361	3.29552	2.88457	3.87124	3.34912	3.71043	3.70051	2.92825	3.48809	2.90244	3.13074	3.03744	3.70051
Peak_544	Chr1	3011430	3012460	5.6871	4.1581	3.82169	4.15332	4.86121	4.58379	4.99992	4.10389	5.56273	7.15072	7.48075	7.44727	4.86759	6.71546	5.97886	7.12521	6.01553	6.52095	5.47982	5.66796	5.70144	4.9505	6.37586	6.23396	4.51523	5.12428	5.204
Peak_545	Chr1	3014412	3016883	6.7148	8.57138	9.72442	8.75158	9.12262	10.1167	6.66493	7.60452	7.02999	5.46001	9.34007	7.43029	7.26273	7.55132	7.38308	7.72022	7.80268	8.31603	6.65628	6.0884	5.91152	9.63133	8.22626	8.88058	5.98067	6.70083	6.25131
Peak_546	Chr1	3019855	3020173	0.896612	1.02544	0.654424	1.67986	0.2628	1.45313	2.11271	1.89628	3.40094	2.1024	0.360706	1.07181	0.912071	2.54555	1.28823	1.00998	1.18002	0.819318	0.2628	1.5768	3.066	0.504988	0.608047	0.7884	1.46859	0.118518	0.422541
Peak_547	Chr1	3031169	3031552	2.55986	1.52821	1.14295	4.3021	1.96484	1.22428	4.21649	3.17628	5.71901	1.98624	0.61214	1.00596	2.18316	1.43831	1.96484	2.29874	1.7294	1.51109	1.83214	3.80982	2.40147	0.693473	1.74653	0.475158	3.56582	2.18316	3.21052
Peak_548	Chr1	3037818	3038377	2.3923	2.63593	2.43046	4.08893	4.06544	2.54787	3.76897	2.60364	3.89225	1.74652	3.65156	2.92066	2.84141	3.58404	2.83847	2.27195	2.85608	2.23673	1.52931	2.32479	0.898213	2.18389	2.46275	2.43927	3.27877	2.8825	2.99404
Peak_549	Chr1	3041322	3042681	3.01321	2.88993	2.3424	4.19166	3.23439	3.71907	4.30649	4.13002	3.19693	3.0821	4.75611	4.39834	4.65458	4.49262	3.26703	3.80489	3.80005	4.1131	3.94509	4.20375	3.45558	4.76336	5.37857	4.89269	3.7517	3.85928	3.50997
Peak_550	Chr1	3046831	3047437	2.4535	2.10416	2.85971	1.54088	2.77034	2.33976	3.17655	2.68639	3.34444	2.16103	2.35601	1.92001	2.26664	1.79544	1.86585	2.3208	2.9599	2.43454	3.73711	1.6817	3.27133	2.45079	2.55099	1.92813	1.4136	1.84689	0.831372
Peak_551	Chr1	3064036	3064843	2.99869	4.1583	4.21119	3.76769	4.20509	3.34454	4.57535	6.64026	6.43274	5.04529	6.01773	5.68612	5.97501	5.26907	5.10022	4.51432	4.23154	3.86128	4.18067	3.13703	4.73199	3.89179	3.74125	3.73514	1.97132	3.30792	1.6092
Peak_552	Chr1	3070996	3072222	8.69587	8.67712	10.053	8.05416	9.52647	8.88074	9.36035	9.56532	10.2486	8.93701	10.5902	10.1025	8.73204	9.11519	10.5004	10.1066	10.0222	9.81049	8.57261	7.29322	9.52379	11.0966	11.7369	11.6512	7.99387	8.31004	7.02528
Peak_553	Chr1	3076487	3077355	2.72199	3.81344	3.33865	4.95596	3.52024	3.37648	6.87213	5.67287	6.24223	3.80209	3.47295	4.39604	4.00827	3.80209	4.41874	4.51711	3.1249	5.05621	3.54105	3.33297	4.23715	3.664	3.52024	2.9906	2.89413	2.84305	2.60471
Peak_554	Chr1	3093745	3094771	6.49033	6.91288	6.25984	7.5355	8.32618	8.1149	7.11135	6.74162	6.39109	6.31266	7.62993	6.11259	6.20382	7.53069	7.06012	6.36548	6.36868	7.34503	7.2842	3.99983	4.80012	6.22623	5.63562	6.04056	5.71404	6.44871	6.84405
Peak_555	Chr1	3099569	3100693	4.68736	4.62014	4.15988	5.68386	6.04768	5.79782	4.32645	5.06725	4.99273	3.64556	4.66836	4.94013	4.08536	4.58653	3.23205	3.70693	3.32849	3.43954	4.84662	3.94947	3.15753	4.88461	4.69612	4.62307	3.65725	4.77649	4.8057
Peak_556	Chr1	3101947	3102978	3.94223	3.41182	3.63641	4.68926	4.63828	4.64147	4.39299	4.86925	3.99797	4.14292	4.01549	5.11772	4.05691	3.7925	4.09036	4.69722	4.68926	4.95207	4.62236	4.40096	5.72618	4.0378	4.17637	3.14582	4.15088	3.11555	4.38662
Peak_557	Chr1	3104473	3105188	5.17472	3.91892	3.51257	4.5296	6.768	6.41674	6.23997	7.02972	5.99432	6.03564	7.54168	8.27633	5.24589	8.0789	6.46725	5.11962	5.03697	3.48961	7.17665	7.00446	6.43281	6.08615	6.02876	5.54205	3.71459	4.65817	4.56633
Peak_558	Chr1	3106402	3107211	6.78012	8.14386	8.38129	9.69835	8.52537	8.85616	7.88207	7.91657	7.41328	7.15352	9.05504	7.01755	9.6253	10.8612	10.5385	7.34226	6.46354	7.92469	7.00132	6.53659	6.79026	10.2564	8.56191	8.67555	4.34285	6.15305	5.63758
Peak_559	Chr1	3115957	3116761	5.93602	5.71548	6.63233	7.54305	8.19035	6.82836	6.57107	9.88928	6.24844	6.39954	10.4794	7.64923	5.94827	8.89892	8.25978	5.838	8.99898	6.96721	7.09994	7.52467	6.15042	8.05354	7.33885	8.76007	6.41384	6.50981	7.28372
Peak_560	Chr1	3119015	3120601	5.7051	4.64445	4.59577	5.98683	7.67619	6.30067	7.03504	6.18674	6.99154	5.34878	7.94135	7.01639	6.29135	5.46168	5.76103	5.5808	5.19963	5.69888	5.7341	6.21056	5.07223	7.31471	8.19616	7.42139	4.64859	6.35661	4.83089
Peak_561	Chr1	3122897	3123723	4.91745	5.57537	5.77811	5.44617	9.19686	6.15774	8.72182	7.21717	9.46122	4.63322	8.41373	7.00051	5.68071	6.22135	7.20325	7.11182	6.70435	7.45569	7.19729	5.5535	5.85363	6.40422	8.99214	7.41593	6.99455	7.51532	5.27125
Peak_562	Chr1	3130317	3131153	5.2613	5.06884	6.60461	8.09129	8.55673	7.87133	10.1259	10.1946	10.3498	9.3148	9.38943	7.33125	9.16162	9.89415	9.64081	8.11093	9.74294	7.96167	8.96522	6.59086	6.91098	8.28572	10.0788	7.96756	6.26682	6.90116	5.96634
Peak_563	Chr1	3135174	3136066	4.34233	2.82187	1.83339	3.79194	5.11176	4.11775	4.69391	3.69622	4.97922	5.02892	4.53928	4.50615	5.55722	4.99579	4.90191	4.93321	5.78179	5.04365	5.20011	4.8246	4.16745	4.38835	5.79284	5.1228	5.16514	3.09798	5.49279
Peak_564	Chr1	3136760	3137603	6.75434	8.11377	11.2923	8.70974	8.29879	8.91619	7.70867	8.29685	8.05729	6.97831	7.1497	7.43405	8.33191	6.77381	7.17696	7.33473	7.4399	8.41176	5.94412	5.80195	5.67925	7.28019	9.93674	7.80605	5.47864	7.23735	6.74849
Peak_565	Chr1	3139594	3140377	2.99404	4.49107	4.17028	5.57085	6.11388	5.56036	7.1748	7.37818	7.78493	4.37365	6.28162	5.10539	6.16002	9.18131	5.67358	4.78041	3.56853	4.37156	5.50166	6.20823	4.7196	7.46624	5.9776	7.01336	3.67127	3.35467	4.20592
Peak_566	Chr1	3140778	3141561	2.56632	3.31483	3.86207	5.74487	5.50795	4.16398	6.41581	5.94825	5.45343	4.6588	5.2249	4.71121	5.13265	6.34452	4.06334	5.9147	6.4871	6.51855	5.33183	5.86648	6.19565	5.7889	5.25425	4.67767	4.69025	2.2644	2.60826
Peak_567	Chr1	3153705	3155146	5.7259	5.8285	4.91313	4.73074	6.21265	4.96328	6.34831	5.84902	6.30727	5.91627	6.09182	5.33946	5.70424	5.95047	6.69598	5.64611	5.33604	4.80141	4.79343	6.39846	5.7145	7.54296	7.20896	5.54123	3.88946	5.32351	4.30212
Peak_568	Chr1	3157461	3159098	5.22038	6.17976	7.85968	7.41311	6.14162	5.52746	6.01619	6.15166	5.86264	10.2792	7.2977	9.72424	7.97007	9.84165	7.667	11.0449	10.1999	10.3013	8.28116	8.05235	10.0062	6.03927	4.63332	6.29517	6.14162	5.23644	6.40756
Peak_569	Chr1	3161022	3162617	5.77489	6.04268	6.14567	9.37248	11.0369	8.72567	8.38168	8.42802	8.88531	8.3827	10.5641	10.7176	10.1521	10.0759	10.0121	7.78122	8.12522	8.48982	7.20651	7.6432	8.35283	9.84625	10.6877	8.84824	5.61627	6.40831	5.68219
Peak_570	Chr1	3166657	3168010	8.2493	6.23766	7.45775	6.44404	11.1459	7.84988	5.44854	5.19724	5.40605	5.06733	10.9141	7.97006	5.3757	5.30164	6.01063	4.23937	5.37449	4.84881	9.03719	5.72169	4.70313	11.7372	11.9326	11.844	6.20002	7.55973	7.86323
Peak_571	Chr1	3172029	3172696	2.98983	2.66501	2.25898	2.22945	2.35741	3.44999	3.63947	4.80095	4.26696	2.55427	3.70098	3.38355	3.4746	2.3328	2.87663	2.86433	4.01842	3.48444	3.84617	3.47951	4.39984	4.30633	4.14146	3.43522	2.63547	2.88647	4.18821
Peak_572	Chr1	3173420	3174367	6.04803	6.50927	5.80875	5.781	6.18848	6.57168	8.21894	8.9316	9.97023	9.06511	9.42924	8.59	10.1471	12.6423	11.5048	9.93729	11.1927	8.80502	9.08592	9.42057	11.8429	8.37847	7.25313	7.9207	7.22712	5.13771	6.54394
Peak_573	Chr1	3179865	3180437	1.77862	3.06095	3.3134	2.88309	2.37532	2.51875	4.99161	3.65191	4.83956	4.73342	2.68801	3.95025	4.5613	5.39323	4.74203	4.63589	5.55962	4.15968	2.87161	3.63469	2.83145	2.03394	3.28471	1.75567	3.24741	2.4872	3.25315
Peak_574	Chr1	3183580	3184270	3.51833	2.71665	2.39313	4.11066	4.83383	4.43656	5.85912	5.61886	5.39762	4.39612	3.4422	4.21057	3.51833	4.48176	4.03691	3.15436	3.9037	3.03304	5.53797	3.7015	2.88555	3.60634	4.48652	4.23912	3.70387	2.87604	3.38987
Peak_575	Chr1	3189314	3190023	5.42913	3.83628	2.30593	4.2507	7.07986	4.80403	5.60277	6.01488	4.24375	4.56788	5.84123	6.76963	6.20935	4.30395	4.48916	5.49859	4.37804	5.25086	5.43376	4.97998	5.36893	4.86654	7.09144	5.21614	3.66032	5.1953	3.83859
Peak_576	Chr1	3191793	3192563	3.80566	3.39418	3.5221	3.00615	4.16384	3.8483	5.0934	5.93981	6.14235	4.13612	4.73309	3.75236	3.37073	4.79918	4.66486	3.86962	6.16154	4.29602	4.66273	3.53489	4.24059	4.89299	3.65855	4.02313	2.71833	4.28323	4.37704
Peak_577	Chr1	3194180	3195087	5.26266	5.71162	5.76593	6.34524	6.11895	6.0411	6.83403	7.05128	7.46584	5.62834	7.57989	5.41834	6.94447	6.50455	6.90282	5.22826	4.51137	6.64757	4.82817	5.64102	7.39342	5.89447	6.07188	6.64576	5.38033	4.03525	4.27059
Peak_578	Chr1	3199540	3200333	3.23789	2.50502	1.9771	2.6313	6.4882	4.7616	5.82572	6.28325	6.33293	4.79887	5.71806	6.22942	4.69536	5.07007	4.24818	4.28337	5.07007	4.28337	3.69335	4.0515	4.82785	4.80508	6.09485	5.35991	3.21719	2.92321	2.46568
Peak_579	Chr1	3201717	3202668	6.51818	6.76854	8.3519	6.96366	7.53	8.12225	7.9703	7.45748	7.17776	8.6178	9.48631	8.78874	10.2374	10.6604	9.99395	8.42615	8.2293	10.9488	7.12768	5.94492	6.02434	8.84227	9.9059	8.38816	4.82776	5.89139	5.45972
Peak_580	Chr1	3205601	3206324	3.77345	3.42607	3.58954	2.90161	4.31381	3.41926	4.83147	6.69095	4.31154	5.30144	4.97223	4.57491	4.03228	3.36477	3.52597	3.54868	3.01059	3.23763	3.82113	3.81431	4.05271	4.5908	5.0131	4.68162	3.42607	3.10594	3.14908
Peak_581	Chr1	3217875	3218667	7.33797	7.49551	6.85707	5.27961	9.47095	8.88019	7.92045	9.14967	6.73891	6.21862	9.17246	6.55442	7.44162	7.28822	7.58257	7.56599	7.26542	6.05901	7.03947	8.27698	6.49845	7.47271	7.58465	7.72353	5.60919	6.55235	6.66014
Peak_582	Chr1	3223975	3224647	1.8685	2.36676	3.23873	4.10581	4.16687	3.20209	5.15363	4.91427	3.58067	2.86503	5.30018	3.72722	3.70524	4.57965	2.97005	4.35983	3.58312	3.4268	4.37936	4.71643	3.08729	3.73699	3.30956	3.43901	3.81759	3.62953	2.42294
Peak_583	Chr1	3226232	3227178	6.28528	6.28528	7.34758	5.59617	9.02608	8.54179	7.18615	6.73832	7.59579	7.11324	10.0693	8.11132	8.59908	9.40101	7.46387	6.8928	5.93118	6.41199	8.83341	5.98498	6.7279	8.63727	8.78308	7.93601	4.78035	5.61353	4.6033
Peak_584	Chr1	3238166	3239510	6.28062	6.83058	6.59227	7.4881	8.68947	8.93756	7.88896	7.6042	8.76157	5.11102	5.73798	6.05207	5.15869	5.65732	7.23022	5.03158	5.93597	5.44711	5.17335	4.53783	4.45473	4.56961	4.98636	5.85898	3.9402	4.71749	5.24912
Peak_585	Chr1	3240734	3241499	2.62877	3.8069	4.15883	4.88416	3.16311	3.72105	6.38202	5.80047	6.54082	2.40774	2.62663	1.86053	5.10304	4.62449	3.39273	3.67599	5.4142	3.65024	4.21247	1.81975	3.04938	2.46998	0.7661	1.75109	2.92706	2.42491	2.73607
Peak_586	Chr1	3244202	3244872	3.24348	2.70454	2.87602	2.5257	2.96421	3.61339	3.22143	3.90982	3.00095	2.79272	3.15774	3.31207	3.64279	3.15774	3.99801	3.81918	3.28513	3.08915	3.32922	3.64279	3.74813	3.42231	3.49826	2.63104	3.19938	2.38852	3.42231
Peak_587	Chr1	3252167	3254403	9.23079	9.17715	9.24696	9.85832	12.2009	9.72752	10.2081	12.5941	11.0164	8.20277	9.31308	9.50928	8.13224	8.15648	8.01392	9.82673	9.76794	8.71495	11.2045	8.21012	7.89709	10.3271	10.4116	10.4131	9.10292	8.72083	8.8766
Peak_588	Chr1	3260749	3261709	6.07056	5.35386	3.14048	5.46675	6.97028	5.21702	6.70344	8.11289	6.90699	5.79859	5.6703	5.63438	5.94569	6.38015	5.34872	4.60124	3.54073	3.83836	5.69253	3.9923	4.54308	6.0928	6.80094	5.49583	4.16335	4.97242	4.42506
Peak_589	Chr1	3262908	3263647	3.03435	3.51193	3.56524	5.2579	3.46528	2.75446	4.00729	3.58079	3.24093	2.58786	3.17651	3.21649	2.94327	2.89662	2.71003	3.01213	2.92328	3.28536	3.17207	2.71891	2.17247	2.8322	2.64561	2.90773	3.88956	2.96771	2.51455
Peak_590	Chr1	3263814	3264701	4.1539	4.1539	5.27197	6.51037	5.79398	7.16936	5.47559	7.8117	6.9861	6.96759	4.39454	4.998	6.04944	6.26972	5.33676	5.87358	6.70288	5.95318	6.09942	6.96759	5.45338	5.50151	7.36373	5.19237	6.41966	4.24831	4.3205
Peak_591	Chr1	3270261	3272129	12.9348	12.5874	14.0553	13.7361	13.6182	13.036	13.1002	12.1107	12.065	10.1363	13.2251	12.2928	12.2523	14.3165	12.4142	12.109	12.4581	11.9181	9.82315	10.4687	9.73344	12.7	13.4511	12.1028	10.0105	13.3746	10.182
Peak_592	Chr1	3273795	3274385	3.01779	3.26255	2.837	4.82846	3.39605	4.16371	4.53085	5.92153	4.00795	2.14165	3.12069	2.1194	4.79508	3.42386	3.47115	4.37231	4.28053	3.43221	2.12775	2.9399	4.66157	3.68253	2.87315	3.20136	2.12775	2.69515	2.41145
Peak_593	Chr1	3279019	3279624	1.61395	2.88612	2.51993	3.77583	3.35268	5.0697	3.08414	4.15016	4.32918	3.40421	3.33098	3.27673	2.07508	2.53349	2.58232	4.06607	3.04345	4.73607	2.17544	2.10492	3.48288	2.21613	3.36082	1.93403	1.321	2.22969	2.21342
Peak_594	Chr1	3295192	3296214	3.15742	3.32293	3.93352	3.66036	7.53122	6.08667	7.3625	7.46534	7.98434	4.58911	5.2929	4.59072	7.2211	6.05775	6.11881	5.24149	5.73639	5.42145	4.26131	5.56285	6.39197	5.0792	5.60302	6.1863	4.17133	3.50611	3.09154
Peak_595	Chr1	3299746	3301044	3.50523	2.80672	4.00128	3.75705	3.61406	3.92535	5.15408	4.86683	5.4021	4.92757	4.88834	4.61248	4.25943	4.84025	5.16294	4.56819	4.24804	4.46949	5.0984	4.21387	4.09112	4.65424	3.54952	4.77572	2.99147	4.9997	3.67353
Peak_596	Chr1	3305219	3306302	6.58577	7.00127	6.12327	7.54414	7.18171	6.58577	5.80027	5.98072	6.26429	6.71314	7.45164	8.28111	7.75796	8.13099	9.2046	7.5214	8.49038	7.56537	8.06578	7.03766	6.48568	6.65098	7.40312	5.8958	5.56826	6.37651	6.01408
Peak_597	Chr1	3310827	3311570	5.85931	6.65911	7.51857	6.28131	4.61321	6.31665	6.31666	6.22165	6.43154	6.78946	7.0568	5.94106	6.15537	6.4448	5.94106	6.9154	5.23405	6.00734	5.74221	3.93493	6.48678	6.89994	5.9035	5.84164	3.82225	6.87342	4.95788
Peak_598	Chr1	3322724	3323573	3.74204	2.98009	2.83699	2.76157	3.73623	2.91047	4.59874	5.87896	4.26418	5.95825	3.94509	5.57921	4.26031	4.43436	4.79986	4.14235	4.58714	3.21216	5.56761	6.48039	5.39743	4.45177	3.51964	4.52525	5.95825	4.3338	5.65076
Peak_599	Chr1	3325829	3327295	8.46098	8.76912	9.31032	9.5714	10.9238	9.76636	9.3529	9.82688	9.49968	8.33995	11.6813	8.45425	10.0006	9.8829	10.6213	8.73326	8.97193	9.72939	7.44915	8.78592	9.0033	12.3088	10.5328	10.5563	7.31469	9.09182	8.02957
Peak_600	Chr1	3328985	3329861	3.54436	1.82372	1.91182	2.09175	3.41316	2.89022	3.67744	2.38977	2.77963	2.29418	1.81623	2.20046	2.62781	2.77213	3.03829	2.92021	3.18449	2.55471	3.50875	3.24447	3.09827	3.08702	2.57533	3.03642	3.70368	3.25009	3.57622
Peak_601	Chr1	3332490	3333269	2.3287	2.00627	2.09056	3.05576	2.05895	2.32238	3.45406	3.17167	2.57316	2.39192	1.32978	2.74597	1.61218	2.76072	1.85031	0.967307	2.79866	1.71755	1.58899	2.472	2.55419	1.99994	2.55209	2.35399	3.25386	2.20226	2.09478
Peak_602	Chr1	3337253	3338215	6.10062	5.25057	4.77774	6.03917	6.66391	6.75609	6.18085	6.0955	5.69266	5.02183	9.83029	6.77998	5.39736	6.96946	6.51029	6.03235	6.49322	4.96209	5.02866	6.12452	5.53391	7.25452	8.11311	7.65395	3.91744	7.26647	4.52682
Peak_603	Chr1	3340966	3341710	5.06596	5.05493	5.27998	5.88013	6.67665	6.02796	7.03189	6.43836	7.29003	4.43712	7.51288	6.65017	5.60653	3.86345	5.73892	5.63522	3.9142	5.06155	4.93578	4.04217	4.03335	4.83649	7.31431	4.37093	3.24565	3.97378	3.42658
Peak_604	Chr1	3346841	3347962	4.27502	3.70512	2.98871	4.81416	6.33928	5.54229	6.97658	8.04314	7.39704	8.8914	7.54648	7.87905	10.6348	9.02911	9.27085	8.27169	8.32003	8.84306	8.08562	7.09817	6.27628	8.39915	8.90898	7.07767	4.73358	5.15552	5.68
Peak_605	Chr1	3349155	3349916	2.75043	2.50883	1.84872	2.86045	3.45368	3.25306	3.68019	3.46015	3.90022	3.52271	3.30052	2.86045	4.4913	4.01455	4.5517	2.5304	3.29189	2.26291	3.55075	3.97788	2.68572	3.57449	4.98745	4.0577	2.621	2.89281	2.36861
Peak_606	Chr1	3355464	3356428	5.22606	3.2484	3.91273	7.37235	5.48497	5.48838	5.71664	7.25822	7.55802	5.51563	6.81192	6.74379	7.01975	8.36543	6.71483	7.2991	9.83548	6.5496	7.76583	6.16122	6.56152	6.20211	6.60071	6.18508	5.73367	4.71844	5.38617
Peak_607	Chr1	3359204	3359873	2.05351	2.23997	4.03587	3.09621	3.93037	5.42941	3.38571	6.67329	5.6772	5.06139	4.62714	4.31556	4.79398	6.504	6.53344	2.79444	5.24786	4.25913	4.20515	4.5241	2.51475	4.10947	5.70174	5.07121	2.50248	3.39062	2.76991
Peak_608	Chr1	3363350	3364316	4.59649	4.68318	7.11742	6.45106	5.63002	4.90077	7.14462	6.41537	6.09408	6.00739	8.36003	7.90276	6.62105	8.49092	7.3418	7.4506	8.8955	8.56062	8.64391	7.89936	6.93043	7.00523	8.06256	7.83137	6.93383	5.10985	5.8646
Peak_609	Chr1	3367981	3369216	6.60707	5.08697	4.68533	5.03776	7.12175	7.27203	8.77352	9.06345	7.75612	7.30129	9.39991	7.50876	7.87582	7.90375	8.04339	8.13516	8.68176	7.99552	6.59643	6.49536	8.14313	7.06723	8.16708	7.79204	5.12287	6.78262	6.57914
Peak_610	Chr1	3370371	3371394	7.98458	6.83681	6.30387	8.5721	9.72788	6.66665	9.69579	9.66047	10.3652	9.11628	12.0122	10.8596	11.2497	10.1517	9.7632	8.86266	9.73431	7.63302	10.1228	9.24631	9.37954	11.2978	12.1534	8.86266	8.23339	8.51431	7.55757
Peak_611	Chr1	3383293	3384044	4.63627	4.18816	5.30078	3.01434	4.0745	4.74775	6.2429	6.86369	6.35438	5.10186	8.67142	6.29317	6.63855	5.33357	7.3577	7.126	5.39696	6.63855	5.06033	7.11944	5.94999	6.65166	5.30297	8.49437	3.45589	4.82207	4.4461
Peak_612	Chr1	3387632	3389300	5.83747	4.51968	5.0338	6.73963	7.92052	7.88604	9.00095	7.13753	8.28788	6.68743	7.96287	6.90805	7.21534	9.25505	7.96779	7.51475	8.49275	8.40509	6.91198	7.05578	6.18415	8.27114	9.14672	7.88605	5.5351	7.25473	6.07778
Peak_613	Chr1	3393932	3395183	11.4159	8.3358	8.20188	9.1485	8.48546	9.70911	10.7306	11.97	9.90605	11.2794	11.8886	10.3932	11.2387	11.9358	10.1201	8.44871	11.4186	8.56556	9.14981	10.0964	9.71962	9.6566	12.4466	9.70124	9.66316	10.1332	8.27277
Peak_614	Chr1	3396017	3396934	4.7541	4.3136	4.82751	4.46043	6.55724	5.02985	4.39239	5.26442	4.06829	4.59115	6.28865	6.57336	5.52227	5.56166	6.05766	6.30119	6.48383	8.12762	4.91704	7.21082	6.86165	4.92599	5.95202	5.7264	4.44073	5.20533	5.08178
Peak_615	Chr1	3397167	3398419	2.03867	4.74377	6.42429	8.42229	3.49223	5.35117	5.92577	7.34261	5.97037	2.34302	0.66906	1.81564	1.53884	1.27121	0.936684	1.0705	1.67265	1.29614	1.76055	2.89926	3.39253	2.55161	2.03079	2.28792	2.77463	3.19968	2.60933
Peak_616	Chr1	3412054	3412966	7.37094	8.59703	9.36762	7.1981	7.6446	9.09214	6.70299	8.35218	8.25315	5.0826	9.09755	8.71045	8.4332	9.3334	8.01729	7.08288	7.34754	7.06667	6.19706	7.39434	7.97228	7.52758	9.90414	7.86966	5.74516	5.67494	5.81897
Peak_617	Chr1	3418474	3419605	4.72081	5.47881	5.33215	4.69177	6.72036	6.29489	4.49719	5.01995	4.08914	3.39213	4.68596	3.18448	2.9565	4.07317	4.06736	4.17337	3.99911	4.68306	4.31276	4.38973	3.77113	4.39263	6.2949	4.96186	4.0601	3.20916	3.66512
Peak_618	Chr1	3429581	3430750	9.60141	9.81637	10.3081	10.6748	12.0053	14.0424	9.99901	11.0541	11.6287	10.0875	12.9606	12.7513	12.7471	13.746	13.2908	11.0345	11.5473	11.4644	10.5104	10.863	11.5487	14.197	14.381	12.2118	9.42157	10.1283	8.33555
Peak_619	Chr1	3431661	3432524	4.85146	5.04552	5.15967	7.41608	6.62081	5.55349	6.3811	7.68624	6.32592	6.96517	4.75443	6.11284	7.33617	5.82175	6.63603	5.31568	5.72092	5.0341	6.20416	5.9321	4.85146	6.54662	5.17109	5.82175	4.56037	5.30997	3.97819
Peak_620	Chr1	3439743	3440144	2.43706	1.63561	0.834162	4.13401	2.3471	2.93183	3.13219	4.67376	2.32257	2.91956	1.50067	2.06905	2.21216	1.0427	2.93592	1.43934	2.80507	1.97909	2.26123	3.02179	4.32619	1.81553	1.08359	0.834162	3.9868	3.12811	3.33664
Peak_621	Chr1	3442494	3444025	8.2447	8.82195	10.6718	8.06551	13.0494	12.3477	10.1782	10.3316	11.7694	8.74362	14.4733	12.1954	9.74149	12.0741	11.6889	10.7608	13.0677	11.97	11.1964	9.1492	9.42603	13.1246	12.0494	12.3091	9.64277	10.7254	10.2876
Peak_622	Chr1	3453139	3453742	2.49834	2.01664	2.66435	3.23315	2.76777	3.5815	4.20473	3.97068	4.40611	2.22075	4.09586	3.46992	3.19777	2.74872	3.90808	2.34594	2.92017	2.92562	2.41942	2.53916	2.43302	3.03992	2.9746	3.48625	1.92955	2.09828	1.98942
Peak_623	Chr1	3460694	3462416	6.60759	7.49293	8.09015	7.782	7.07602	7.20767	8.73889	6.17923	7.57306	7.34219	10.5525	9.06421	8.02623	9.82743	7.61027	8.25138	7.61123	6.81939	7.19431	6.92814	7.06838	9.78832	10.2663	10.0564	6.29658	6.86518	7.10368
Peak_624	Chr1	3469809	3470711	2.64317	2.98176	3.04729	3.3968	4.15043	3.78453	3.98842	4.49994	5.36279	3.92288	4.51996	2.8252	3.80274	3.8883	3.8974	3.99024	4.82032	2.98904	3.56609	4.15953	2.9144	4.41984	3.80274	4.31062	3.25481	2.49208	3.34219
Peak_625	Chr1	3484637	3486614	3.39063	2.45737	2.04601	2.88037	2.4956	2.39089	1.9546	2.56208	2.47815	2.97843	2.62773	2.41499	3.25101	2.64934	3.08148	4.00642	3.66154	4.16931	3.01666	4.13025	3.55517	2.35599	3.19949	2.61859	4.02637	2.34685	3.11721
Peak_626	Chr1	3487477	3488239	4.9249	4.81503	5.40748	6.66995	7.04696	6.16151	6.8423	8.20386	7.43475	7.0168	7.14175	8.53348	8.40422	6.22399	6.96078	6.79275	6.76474	7.66958	4.82149	7.57263	5.77157	8.45162	7.14176	8.46023	6.31663	6.4739	5.68109
Peak_627	Chr1	3492716	3493887	6.36618	5.81217	6.91598	6.00432	7.94544	7.65371	7.51066	7.79678	8.08289	9.01278	10.6762	11.4967	8.08851	11.0928	10.6482	7.29607	8.62709	7.27924	8.84588	8.26663	7.92581	8.801	11.4981	9.42233	8.36901	8.7982	7.58218
Peak_628	Chr1	3502765	3504410	5.63342	5.02924	5.29688	6.21864	6.35345	6.15372	6.73394	5.53256	6.87075	4.94035	8.27986	6.82382	6.80884	7.43499	7.11143	6.21764	5.25693	5.50759	6.08781	5.86411	7.12042	6.22163	7.26223	7.29918	4.7536	5.5006	4.55587
Peak_629	Chr1	3514114	3514798	3.60194	2.84124	2.23411	4.57621	3.67873	4.89777	5.83365	5.66327	5.59368	3.8539	4.78498	4.43463	3.16039	3.99788	4.98896	3.94029	4.29305	3.54914	5.25532	3.25398	3.67153	6.42158	3.9163	4.88097	3.05241	3.69553	1.81177
Peak_630	Chr1	3525342	3526373	5.58442	5.80901	6.48755	5.91891	7.87648	8.34477	5.91254	5.28179	5.73414	4.10628	4.21619	4.05213	3.84347	4.57457	3.23979	5.68636	5.1687	5.84883	5.38372	4.48537	3.57428	4.89155	5.30249	4.91225	3.80365	4.06009	3.57906
Peak_631	Chr1	3530492	3531635	1.97858	2.8522	2.9456	3.21717	2.20992	2.2717	4.04912	4.02039	3.57926	4.21436	2.05186	2.99876	1.81334	3.02175	3.22435	2.76886	2.8091	2.49729	2.67547	3.07348	4.93998	1.99582	1.41964	2.05043	1.75874	2.12514	1.75874
Peak_632	Chr1	3532387	3533317	3.81197	3.85787	4.00442	5.22269	8.25602	6.44803	5.81947	5.72589	5.67998	5.49989	5.62702	5.74708	5.96249	4.90664	5.37277	5.18032	4.41934	4.99846	5.24388	5.25447	4.14213	6.21497	4.73362	5.09557	4.03973	4.95255	4.29044
Peak_633	Chr1	3535443	3536216	5.54726	4.91013	5.19896	5.63221	7.32908	6.08244	5.989	5.65344	6.56028	4.05	8.35911	6.27145	5.56212	6.54967	6.7047	7.03814	4.03939	6.09943	6.72806	6.25871	6.73656	6.19288	8.26779	5.80848	4.17106	6.89372	4.34096
Peak_634	Chr1	3549824	3550743	5.19402	3.18931	2.82482	4.10054	2.35312	4.68837	3.18573	3.86648	4.549	8.61738	6.24461	6.60553	4.92601	3.8772	4.80987	3.83074	3.63778	4.35425	7.65433	6.51262	9.13017	5.79436	4.59546	5.01356	5.37626	4.32031	3.91829
Peak_635	Chr1	3553977	3555062	7.56506	7.5363	9.50401	7.48787	8.09634	8.50653	9.52671	9.92176	9.4374	7.85113	9.03326	9.44043	8.28706	8.97272	9.46465	6.79312	7.81027	8.04791	6.9475	7.32742	7.64074	7.64831	8.33701	8.07666	6.25275	6.4359	8.02217
Peak_636	Chr1	3558408	3558830	0.773319	0.22539	0.198187	1.78369	0.792749	1.78368	1.38343	1.5855	1.38342	2.25389	0.396374	1.12306	0.54793	1.43394	0.761661	1.65156	2.27721	1.32125	1.98187	2.41711	1.93135	0.676169	0	0.198187	1.23576	0.396375	0.990936
Peak_637	Chr1	3562828	3563944	8.34403	9.1284	7.20942	7.56113	7.9099	7.96877	8.70605	9.21375	9.05923	7.99525	11.1828	9.94955	8.38965	10.4528	10.107	6.89744	8.86792	6.98868	8.32637	9.13134	9.21228	10.9915	12.8089	10.6294	8.43968	9.30646	7.85398
Peak_638	Chr1	3565165	3565942	3.1101	3.88974	3.77142	5.74058	6.01314	5.77016	6.45261	6.78855	6.56036	6.01525	7.55339	7.58086	4.83418	6.45472	7.51748	9.14859	7.12238	7.64003	5.17645	6.34696	5.3328	6.06385	7.28507	7.1414	4.82783	6.18428	5.44901
Peak_639	Chr1	3569576	3570878	8.38421	7.679	7.76353	10.5515	8.87116	11.0498	7.76479	8.94307	7.1214	5.90275	7.44814	7.09743	5.88509	5.43472	6.88423	5.99485	7.90356	6.75934	7.45949	5.81444	7.86066	8.73113	9.28747	9.83246	6.72275	6.94857	6.59912
Peak_640	Chr1	3589340	3590657	1.46295	1.20852	1.71737	1.14367	2.12021	2.0354	5.92413	5.34294	6.07503	8.47336	4.11446	5.85178	7.59411	8.80013	7.74376	5.82685	4.68442	5.96279	2.83734	6.13864	7.16507	2.94834	3.56196	3.43475	1.67996	1.61885	1.84458
Peak_641	Chr1	3594504	3595117	1.58757	1.29308	0.781737	3.20191	1.33056	2.123	2.01324	1.36536	1.83922	2.00253	1.5019	1.36536	1.20473	2.11765	1.30646	1.45906	1.5019	1.81245	2.08285	2.24883	1.77497	1.34127	1.68395	1.09229	1.76694	1.22883	1.63843
Peak_642	Chr1	3604196	3605114	7.21013	6.8202	6.55548	8.11878	8.85749	7.00264	8.56237	10.0953	8.92904	7.83259	8.04544	6.20311	7.389	9.74467	8.78058	8.21	8.34952	8.1635	7.08134	8.40138	7.62331	8.56237	9.81981	8.26366	6.75044	7.7521	7.29777
Peak_643	Chr1	3606680	3607597	7.12309	6.26001	5.26084	7.34512	7.07831	7.27886	7.84112	7.28961	8.2261	7.70324	7.64057	8.32459	8.75792	7.86261	8.0363	7.09802	7.10876	7.29498	6.91537	7.74263	6.49995	9.48133	8.48933	6.91358	4.20079	6.75959	5.02268
Peak_644	Chr1	3609646	3610549	6.27513	7.61162	9.87364	7.2334	8.10802	8.86263	9.36087	11.4811	8.54806	6.32967	9.81363	8.08438	8.68262	9.73726	9.47724	7.71708	8.7099	9.25177	8.60625	6.98064	6.62788	10.0264	8.9572	9.65908	6.0551	8.16076	6.07692
Peak_645	Chr1	3611682	3613216	5.51928	6.38989	8.01012	8.53914	7.47897	8.1836	6.29566	6.35027	7.55714	6.68117	6.0772	6.22069	7.06669	7.30013	6.20249	7.70064	7.23695	7.65674	6.36633	6.85893	6.81717	5.73024	7.09346	7.23267	6.07184	5.40041	6.452
Peak_646	Chr1	3615646	3616259	3.91939	4.23262	3.67845	1.9597	2.45765	4.03986	4.45483	4.97152	4.49498	3.43214	3.27687	4.61278	2.49781	2.86726	3.5901	2.97702	2.59419	2.22741	3.69986	2.86726	2.94222	3.95955	4.20853	2.21671	2.73072	2.50584	3.39734
Peak_647	Chr1	3623170	3623864	3.73932	5.30743	4.22182	7.02454	6.65793	6.2937	7.35566	6.56333	7.35802	6.2937	4.45833	5.7568	6.10922	5.88689	6.83059	5.52739	5.29324	5.54867	4.27385	4.23364	6.93702	4.66174	5.78046	6.01934	4.1887	4.62153	5.91054
Peak_648	Chr1	3627591	3628316	5.16231	4.63023	3.87626	4.84986	6.55704	5.10118	5.57666	5.92987	6.0476	6.231	6.32836	6.13137	4.59401	6.28534	6.46647	6.16987	6.23553	6.61818	6.28534	2.80078	5.06042	7.65969	4.52834	6.21968	3.71098	4.27249	4.15702
Peak_649	Chr1	3636425	3637233	2.17614	3.41965	4.66316	3.76304	2.17208	2.7024	7.29038	9.05811	7.5728	4.15925	2.28789	3.22865	2.13347	4.08204	5.2971	3.3912	2.70443	3.4481	2.76742	3.20833	3.64925	2.63331	2.90762	3.02953	2.98279	2.57439	2.47889
Peak_650	Chr1	3639769	3640632	5.4793	5.40129	6.12426	8.25129	7.14781	6.47241	5.86551	9.45559	7.45412	6.09762	7.19157	8.21894	6.06908	6.18513	8.1124	4.70306	6.22699	4.75253	6.00249	6.43246	7.11547	7.42178	7.81561	7.69575	6.11284	4.99796	4.75443
Peak_651	Chr1	3646833	3647697	4.36127	3.80257	4.576	4.73563	5.04538	4.94657	5.58698	4.07052	5.31903	4.46768	3.17166	4.63491	4.81355	5.91193	4.72233	3.94319	4.08952	4.70143	3.94129	4.07621	4.53799	4.63111	4.71853	4.35937	3.4339	3.62964	3.35979
Peak_652	Chr1	3647974	3648820	2.17749	1.88056	2.67237	3.66214	3.35938	4.92554	4.68295	4.256	4.19001	3.84456	2.70536	4.01729	2.02029	2.72671	2.67237	3.39432	3.1362	3.32639	3.68542	2.80434	2.8121	2.99259	3.22159	2.40261	3.27787	4.04058	3.27981
Peak_653	Chr1	3657658	3658588	5.78946	6.93358	9.19357	8.1801	8.96933	8.54381	8.48379	11.4659	10.4436	7.06776	9.47253	9.25712	8.24719	9.33304	8.57736	6.74289	8.77865	6.54691	8.46259	7.21077	6.93357	7.83404	8.05651	8.77688	5.40278	5.50519	4.95432
Peak_654	Chr1	3659089	3659909	6.82343	8.47522	7.69638	6.81342	9.2901	10.6916	8.09481	7.63831	7.73641	8.01271	13.9652	11.1281	8.85163	10.3973	8.47922	8.25298	8.44519	8.04275	7.4441	9.06386	7.70438	9.34617	10.2512	9.48232	6.24079	7.06169	8.49524
Peak_655	Chr1	3664239	3665593	6.06322	8.17891	8.81095	10.3989	5.78419	8.17405	7.30061	7.9193	7.67182	6.99125	6.11416	5.86426	6.95001	6.06806	5.76114	7.9193	9.3241	8.47613	7.11499	6.98519	7.85621	6.4866	6.53148	6.46961	5.86911	6.4963	6.55817
Peak_656	Chr1	3666589	3667203	4.00122	3.43993	2.00195	3.13523	1.96987	2.97753	4.20436	4.89127	3.44527	1.63577	2.02066	3.0096	3.40786	4.22574	3.905	3.65643	3.62168	3.8462	1.98591	1.97255	2.45365	2.43495	3.93173	2.05006	3.07642	2.04204	3.70186
Peak_657	Chr1	3676655	3677698	5.87922	8.08354	7.36556	8.11503	8.97313	8.67555	8.28507	9.14791	7.6096	6.78299	9.69425	9.18569	8.54172	10.0832	8.47086	7.96387	6.70112	7.61433	7.54977	6.80031	8.1103	9.19672	9.69741	8.62517	6.01935	6.424	6.5846
Peak_658	Chr1	3681715	3683018	7.88741	10.2283	10.6695	10.9292	12.7507	12.7255	11.2506	12.5944	13.144	9.57279	10.0493	8.63871	8.74334	10.6481	10.0518	8.39164	10.0001	9.43162	8.17482	8.45214	6.87895	9.83626	9.70768	9.4001	7.11972	7.09073	6.69743
Peak_659	Chr1	3684555	3685650	7.778	8.21145	8.34793	9.91673	9.09033	8.22044	9.3843	9.54777	10.0277	9.34529	12.3614	9.86123	9.45329	11.4195	10.1087	9.94372	10.4837	9.09633	10.0982	9.57476	8.31793	11.2156	12.8773	11.8155	8.08696	9.15782	7.7555
Peak_660	Chr1	3702517	3703578	7.05498	6.57825	7.6447	7.22989	7.59671	8.69102	9.208	10.1073	10.6382	8.36443	9.47268	8.90617	9.65223	10.3302	9.47422	8.36754	9.22967	6.53956	7.93878	7.66637	9.24979	10.6599	9.66926	8.45267	5.99162	6.473	7.02557
Peak_661	Chr1	3709098	3709484	1.08312	0.433247	0.964186	4.3622	1.72024	1.17231	3.98842	3.03697	2.40409	3.02423	2.2257	1.94961	2.50603	1.84342	0.866493	1.7075	2.17048	1.94112	3.12617	2.86707	2.53577	1.49513	1.1171	1.41867	3.14741	0.815523	1.7075
Peak_662	Chr1	3715110	3715604	3.23112	3.93181	3.04848	4.76533	4.05468	2.52712	2.18508	0.880008	1.86296	4.39672	1.75337	2.20168	2.21164	1.80983	2.19836	2.55701	3.66615	2.92893	3.52667	4.99446	2.29798	2.84923	1.29511	2.7961	3.44697	2.00243	3.10161
Peak_663	Chr1	3719070	3719531	2.30557	2.1846	1.43031	3.32672	1.94977	2.35894	2.30557	1.45166	1.7612	1.38761	1.45166	1.3129	2.83927	1.23462	2.28778	1.45166	1.97112	2.63647	2.38385	2.99938	1.99603	2.81437	0.725829	2.76455	1.5584	1.93199	1.74341
Peak_664	Chr1	3722796	3723514	2.82119	2.82576	3.41789	4.21807	3.55964	3.52763	3.00637	2.75489	3.14812	3.29672	2.39824	2.58571	3.7311	3.78597	3.50705	5.28116	3.55735	3.78826	2.68859	3.04752	2.02787	2.31822	3.87285	2.98351	2.71602	1.51576	2.42339
Peak_665	Chr1	3728782	3729527	4.79696	4.18659	3.39995	4.48627	4.35405	4.09405	5.99785	4.04778	4.03896	3.93319	5.16934	4.7661	5.27511	5.92513	6.02208	5.34342	3.96184	4.87408	4.94899	6.06615	4.83	6.17192	5.7753	6.64567	3.46826	4.18219	5.82597
Peak_666	Chr1	3744765	3746461	3.90267	3.70506	3.75446	3.68182	5.08828	4.74151	5.5542	5.46218	5.6036	5.85157	4.66789	6.73304	6.48992	6.47151	6.23709	4.64368	5.44184	4.35502	5.81573	5.45927	5.18709	5.25586	6.24582	4.99723	4.69308	4.00147	4.02471
Peak_667	Chr1	3753231	3753870	3.42627	4.49474	4.08379	4.69764	6.36968	5.68134	5.01099	5.09318	6.83199	3.31069	5.4245	3.68825	4.99558	4.18139	5.50412	4.95962	3.71394	3.2773	3.3184	4.51271	3.9117	4.03499	3.54185	5.91507	4.5461	4.2944	4.28412
Peak_668	Chr1	3755981	3757054	2.10754	1.24891	0.858627	1.32697	1.17085	1.32697	1.58563	1.80449	1.60246	3.96254	1.79531	3.20034	4.43088	7.1292	5.94916	3.57532	4.58088	4.67577	2.86515	4.60536	4.02223	1.6392	1.0928	1.56114	2.02948	1.2183	1.78766
Peak_669	Chr1	3767588	3768416	6.16867	5.18319	4.55066	6.19643	7.86599	7.00147	8.30619	6.97768	6.58705	7.25924	7.8878	6.21824	6.39075	7.64589	8.94863	7.33261	7.25329	7.19381	5.6789	6.41454	6.84085	6.47601	7.11251	7.7153	5.51631	6.18652	5.89305
Peak_670	Chr1	3777247	3778518	2.87534	3.42714	3.99187	4.54756	3.91046	2.82235	3.83163	4.87709	3.42714	5.79203	6.61909	5.47154	5.74163	6.17454	5.97036	4.39636	5.478	4.38473	6.80518	7.14376	6.4666	5.65505	5.09807	4.57599	6.65398	4.08621	5.82304
Peak_671	Chr1	3778718	3779444	2.60022	2.13896	0.841113	1.6144	2.25653	1.87668	2.11635	1.22323	1.31367	2.30628	1.70031	2.15479	1.90155	3.20618	2.096	2.20679	2.659	1.68901	2.66579	3.75788	3.69683	1.72971	1.36568	2.53691	2.92355	2.42159	2.76301
Peak_672	Chr1	3786324	3787015	1.31123	1.45376	0.484585	1.63666	2.23289	1.06419	1.81719	2.20914	1.33261	2.94314	1.88846	3.01203	3.35884	3.13317	3.37309	2.63909	3.87668	3.62014	2.34691	2.59158	2.30415	2.38729	3.14505	2.65334	2.00248	2.02623	2.66522
Peak_673	Chr1	3790172	3790796	4.26596	4.42376	3.57162	3.71628	3.25075	4.12919	2.467	3.39015	2.76419	2.58272	2.39336	3.07717	2.65899	2.70107	2.66688	2.03304	2.4144	2.54853	3.55584	3.25864	3.2113	2.88255	2.93515	2.88518	2.29867	1.78844	2.18295
Peak_674	Chr1	3793193	3794141	4.74603	4.48101	4.0757	5.58438	4.52258	5.2137	6.09536	4.00988	4.15191	4.50699	5.10111	5.28298	4.4048	6.62192	6.00528	5.73507	4.507	5.94986	5.23102	5.04742	4.28008	4.6473	5.00585	4.39268	5.21197	5.00758	4.32858
Peak_675	Chr1	3797751	3798332	2.71705	2.6069	1.71722	2.08157	2.2482	1.50539	1.8415	2.81591	2.06462	1.90645	1.85562	2.36683	1.21166	2.01096	1.87256	1.88104	2.12111	1.44043	1.56753	2.05897	1.76806	2.59278	2.49393	2.39507	1.61837	2.6182	2.54759
Peak_676	Chr1	3802153	3804228	6.36849	5.12853	4.93453	5.69388	9.20711	9.00441	7.30916	7.21256	7.55145	5.63607	9.11605	8.62038	8.8413	8.93315	8.67423	7.69002	8.95374	7.93785	7.72089	6.25843	6.01059	8.80488	8.83101	8.58001	5.77464	6.50944	5.69387
Peak_677	Chr1	3807026	3807927	4.94412	3.43884	2.6953	4.81473	3.9327	3.70308	4.72544	5.56191	4.04204	5.35051	5.11178	3.81971	5.62569	5.74232	3.7778	4.32634	5.14276	3.58827	3.84887	3.53724	4.4867	3.83247	6.00839	3.43884	4.55413	6.04849	3.79238
Peak_678	Chr1	3810345	3811318	4.23098	3.85632	3.06987	3.57954	5.706	5.27902	2.56019	2.37286	2.17709	3.05299	4.06897	4.18879	3.12725	2.71377	3.06649	3.62849	2.98717	2.8741	3.17113	2.85385	2.32223	4.6259	5.74989	5.55749	4.7491	6.04185	5.02081
Peak_679	Chr1	3812831	3813648	2.03364	2.62444	2.40942	1.66187	1.94723	2.30894	2.77515	3.68948	4.34659	2.9138	2.45965	3.19916	1.78044	2.25468	2.72491	3.43025	3.587	3.09466	3.49255	3.33179	3.07457	3.17705	4.46516	3.45236	3.13887	2.98414	2.77917
Peak_680	Chr1	3819477	3820827	3.53701	3.12697	3.37153	2.56241	4.50795	3.07587	3.08317	3.23526	2.53199	3.8497	6.81119	4.67464	4.37046	3.38005	5.24284	3.33503	4.52985	3.53701	4.38627	4.38384	3.23161	4.79266	4.58825	4.84376	4.52741	3.90932	4.02247
Peak_681	Chr1	3822005	3823072	6.52744	5.06989	5.9749	6.38892	6.47049	7.67563	9.50412	8.85922	10.2044	7.51864	9.90428	8.33283	11.0556	11.6173	10.0797	8.32053	9.18398	8.58526	8.01116	7.03073	7.81107	8.87	10.1398	9.13934	8.66682	6.74754	7.11538
Peak_682	Chr1	3832501	3833466	6.90527	7.84288	7.37663	7.95859	7.74929	10.1197	6.42201	7.43959	8.6988	6.50879	12.0681	10.0924	8.50993	7.72376	7.93476	6.76574	8.92513	7.5468	8.66817	8.10493	6.15314	10.9331	10.9348	10.5111	7.80714	9.4169	8.33125
Peak_683	Chr1	3836786	3837715	5.89113	5.21417	5.71084	6.00778	6.96047	7.04531	8.23839	5.39799	6.47264	7.34225	8.14117	7.21322	6.23403	7.03117	6.05373	5.48813	6.65646	4.01933	5.05155	7.04001	7.16727	7.06122	6.11914	6.53627	5.29017	5.64721	5.58888
Peak_684	Chr1	3837768	3838416	3.16347	3.29264	4.4476	4.82246	5.71653	5.19477	4.29057	3.64977	3.44461	3.60671	3.67256	5.59749	2.8418	3.16094	4.35642	5.00229	4.1158	3.57378	3.13814	4.59197	2.66197	2.8722	2.87726	3.6599	3.87519	5.00229	4.58944
Peak_685	Chr1	3841299	3842638	1.61435	3.11461	3.64823	2.96986	2.37736	3.11829	2.41662	2.69017	2.16882	2.08418	3.16736	2.8018	4.29225	3.29862	3.81015	4.28735	3.40412	3.35259	2.37736	3.22501	4.40633	2.87786	2.39331	2.25346	2.52824	2.25224	2.86313
Peak_686	Chr1	3847084	3848127	9.28174	10.3713	9.40298	12.489	12.4465	10.9208	10.3099	10.9743	12.0198	9.73991	11.7065	12.0907	10.661	12.3111	11.1853	13.8541	11.3711	11.4593	10.1808	10.9365	11.3113	12.0922	12.4024	12.6874	9.44233	11.0814	9.636
Peak_687	Chr1	3849234	3850057	2.95044	6.17019	5.9727	4.93536	5.33433	5.03909	5.59567	5.55976	6.01459	5.43408	4.97326	5.01315	5.94477	7.20953	5.90487	6.45546	5.90088	6.15822	3.66261	4.34287	5.00717	4.37679	4.47653	4.295	4.03366	3.75638	3.57484
Peak_688	Chr1	3862400	3862946	1.21706	1.82409	1.87819	3.93668	2.79173	3.6542	3.01712	2.75868	3.46187	2.8308	3.19141	3.67223	3.67824	3.84652	3.9517	3.74736	2.60542	4.11699	2.93297	1.99238	2.75868	3.86155	2.48522	2.89992	3.66922	2.32294	2.74666
Peak_689	Chr1	3866088	3867070	7.67547	6.0668	7.36277	6.71061	8.17044	7.60691	8.69887	7.81928	8.18717	8.65371	9.07846	9.80754	10.0417	10.5684	9.19551	9.4497	9.98481	8.12363	8.36108	7.07849	7.4932	7.64537	9.72728	9.84936	5.45811	8.52998	4.09358
Peak_690	Chr1	3874403	3875023	3.71375	2.02496	1.21497	2.94611	5.8684	5.00813	3.98903	4.89166	4.4999	3.7508	4.32785	5.04783	5.32312	3.27434	5.09283	3.7508	2.99641	2.53583	3.17111	3.23993	3.64492	3.68992	4.73549	4.16109	3.54698	4.13727	3.72698
Peak_691	Chr1	3879582	3880336	3.21138	3.22879	2.87609	3.08292	4.61567	3.26145	2.21639	2.64748	3.08945	2.14454	2.03568	1.27584	2.69756	1.36946	2.18591	2.16196	2.88697	2.33179	2.30348	2.76505	2.88044	2.43194	3.07421	2.32743	2.7411	2.49072	2.34267
Peak_692	Chr1	3896006	3897026	4.23264	4.96679	4.92654	5.78305	6.63311	6.30467	4.83316	6.02293	5.17286	4.10544	5.82973	3.99436	5.5496	5.292	5.33708	3.8076	4.72529	4.5659	4.10544	5.08753	4.97966	6.99375	5.22438	5.43207	3.31012	4.01368	2.70959
Peak_693	Chr1	3913654	3914577	7.86137	8.62633	8.90386	8.61922	10.2594	8.63878	7.46287	10.2808	7.99123	8.75619	10.6793	10.7753	10.3786	10.1936	11.937	8.85405	7.486	8.83626	8.86293	9.57097	8.98568	9.97303	12.8799	10.3875	7.57317	7.43975	7.53047
Peak_694	Chr1	3914666	3915787	9.11556	9.82611	9.94331	11.0465	10.5909	12.1306	9.42322	10.6758	9.60781	12.0793	13.647	11.7336	11.2838	11.7175	12.0852	11.7234	11.1813	11.0113	10.7593	10.0239	10.4502	13.584	13.0976	11.9475	8.81668	10.3506	11.0128
Peak_695	Chr1	3920452	3921158	3.20155	3.52705	3.0481	3.55728	3.99206	5.16154	4.18271	4.71514	4.17108	3.727	4.45938	4.25943	3.75491	6.23337	3.39685	4.03158	3.32013	4.15016	4.74304	3.87813	4.12458	5.39637	5.07319	4.64074	3.10622	4.38731	3.25968
Peak_696	Chr1	3930426	3930794	2.47237	1.74179	1.32305	3.13612	2.69955	2.16053	1.77298	1.94225	2.02689	1.36314	1.30523	1.13595	1.70615	2.05362	1.47896	2.5481	1.78634	1.82198	2.459	1.57251	1.59033	1.10922	1.26068	2.41	1.24286	1.71061	1.57697
Peak_697	Chr1	3938419	3939337	4.89202	5.04584	4.95999	5.00828	6.48214	5.53593	7.73779	6.13157	7.31745	3.87426	7.41404	6.16197	6.41596	5.65577	6.2675	4.68632	5.44293	6.24067	5.37138	6.28718	5.06194	6.07433	6.40881	5.24081	3.34839	5.12633	4.17297
Peak_698	Chr1	3945643	3946650	6.11202	4.57423	4.07523	7.15733	5.15641	5.7875	5.03737	5.11727	5.3896	6.94859	4.6998	6.28977	5.93101	5.64726	5.23631	9.67194	9.1289	8.65598	7.57969	7.90094	7.36769	7.19158	7.28127	6.55233	9.04409	6.24738	6.94859
Peak_699	Chr1	3948669	3949404	3.17814	5.35348	6.0369	5.85823	6.88783	5.79123	5.82026	5.35348	5.71976	4.16977	4.08267	3.9978	3.60472	3.92186	4.0916	4.81523	5.07207	4.92243	4.58072	3.55112	4.90903	4.33281	6.21334	4.73483	3.05307	5.63936	5.23957
Peak_700	Chr1	3951301	3952060	4.63289	5.39206	5.14117	5.88736	6.74602	4.42525	4.86864	4.47284	4.89459	3.99267	3.84344	2.83121	3.60336	4.48581	3.77639	3.73313	3.18592	3.79585	3.87372	3.75476	3.24864	2.86798	2.00283	3.1989	3.41951	2.31428	2.7382
Peak_701	Chr1	3967407	3968192	5.66543	5.08613	5.33918	5.31826	7.57899	5.77626	5.92893	6.15061	6.07114	4.89163	5.66542	5.48557	5.5023	4.82261	4.11783	3.85224	5.36427	3.89197	4.77242	4.85608	4.67622	7.77767	6.59189	7.07708	4.15966	4.35416	3.65983
Peak_702	Chr1	3971202	3971934	4.95155	3.50735	4.48061	5.29017	6.03694	5.79923	6.03919	4.67123	5.20047	6.21634	7.15149	7.39592	5.93154	5.31932	7.11336	4.40213	5.67365	5.38436	5.27896	4.87306	4.77663	7.1941	6.90033	5.67814	4.91791	5.46509	4.84615
Peak_703	Chr1	3972729	3973369	4.30309	4.06972	3.13884	3.79277	5.18268	4.67749	5.22371	4.37745	4.98265	5.52887	4.87751	4.55952	3.92355	4.70826	4.55696	3.66198	4.3236	3.80046	4.94675	2.92086	2.95164	4.83905	5.83148	3.69788	4.05433	4.04664	2.50799
Peak_704	Chr1	3978568	3979310	4.01323	3.68138	5.00437	4.96013	5.78534	5.14818	6.29197	5.41588	5.84065	5.62383	4.87827	5.58622	5.20791	6.60391	4.08403	3.17032	5.188	3.8274	5.85613	5.08402	5.56631	6.14596	7.26099	6.56188	5.3141	4.51323	4.37827
Peak_705	Chr1	3981180	3982104	6.25351	6.35302	6.87903	7.89907	9.24075	10.1364	7.43526	9.05061	8.03946	6.93412	9.41846	8.03768	7.97549	8.55658	8.21538	8.1834	8.32912	7.72137	7.42104	6.9821	6.06691	9.44335	9.02929	10.0511	5.25657	7.97193	6.34413
Peak_706	Chr1	3986556	3987342	4.65775	4.10843	3.83481	6.26185	4.73294	4.34236	6.27647	6.43939	6.35584	5.64569	5.9026	6.08849	4.67028	7.2477	5.74177	5.5162	5.60601	5.57259	4.12722	5.21333	4.41964	5.56841	6.57307	5.54753	3.94133	3.94133	3.83481
Peak_707	Chr1	3992535	3993610	5.66313	6.59196	7.08846	7.76675	7.24733	7.21983	8.94918	7.16331	9.71301	5.47522	7.08998	7.45662	6.92041	6.34447	7.10067	5.82965	6.62251	7.38483	5.62646	5.36828	5.06122	7.95771	6.94944	6.3567	5.74409	5.87089	5.04288
Peak_708	Chr1	3995344	3996231	2.26576	3.89659	4.3205	3.39864	4.25201	4.3279	4.76847	3.71704	4.40009	3.70222	3.14134	2.99325	3.78923	5.07575	4.1539	4.70738	4.21684	4.35752	2.90069	3.45788	3.20983	3.43196	3.57635	3.68187	2.46198	2.91365	2.8322
Peak_709	Chr1	4001234	4003025	5.38084	6.50269	8.99681	8.60788	7.07874	8.22353	8.1795	6.88612	7.82909	6.2862	7.69883	7.39154	8.26114	7.24294	7.81258	9.93887	10.7066	9.93795	6.70082	5.40193	4.95888	7.39155	8.72896	7.20442	6.27795	5.75877	5.35515
Peak_710	Chr1	4003736	4004529	5.0059	6.56273	7.867	7.57509	6.30602	7.08444	8.29969	7.84423	8.15683	6.12383	7.52747	5.89818	7.37635	9.96417	6.30602	7.34322	7.52334	7.47572	6.66831	7.28318	8.17339	8.55226	6.88363	6.9623	6.335	6.70351	7.36806
Peak_711	Chr1	4009671	4010552	7.55547	6.61057	7.69524	6.36828	7.93193	7.49582	9.22721	9.07252	8.20589	7.24608	9.72668	8.89733	8.8582	9.09674	7.70642	6.98144	8.00835	8.75569	6.15954	7.12494	6.69816	9.03338	9.32599	9.37258	4.9705	8.12017	8.12575
Peak_712	Chr1	4010697	4011417	4.37052	5.0294	4.89945	6.34033	5.86611	7.84732	5.56517	6.62759	6.95589	5.18215	7.69001	4.60762	5.87295	6.75298	4.67602	4.06273	4.3614	3.6706	4.76265	6.57287	5.48081	5.03624	5.10008	6.23089	3.36053	3.83019	4.05817
Peak_713	Chr1	4014144	4015702	4.46322	5.26982	5.8898	6.35795	6.52243	8.19469	6.00262	6.86933	6.31366	6.64158	7.4039	6.81661	5.1802	5.7327	5.30251	5.15279	6.40224	4.93031	6.86722	6.77338	4.64457	6.3453	6.29153	5.98048	5.2287	5.72427	5.88453
Peak_714	Chr1	4019912	4021062	6.71511	6.33666	5.60116	6.131	7.24352	7.12784	7.9376	8.40032	9.15723	7.95473	9.62708	8.27464	7.49345	8.5217	6.99502	8.01186	7.18212	7.28351	7.85334	6.48803	6.93361	8.21609	9.01013	8.59169	3.93309	6.14957	4.02735
Peak_715	Chr1	4028600	4029492	7.17156	7.96308	6.21253	7.64463	10.091	7.80845	8.79694	7.93179	7.98148	10.2879	9.17981	8.89449	8.67913	8.19317	7.25071	8.05512	8.48769	7.67776	7.70721	9.45592	8.45087	8.91843	8.76933	9.98422	6.4371	7.5618	5.80388
Peak_716	Chr1	4033391	4034168	3.98693	4.14962	5.30534	6.23076	7.88934	7.3738	7.71186	7.45198	7.34634	4.99686	6.72728	5.53141	6.93011	5.84622	6.03426	6.45684	6.38711	5.03067	4.53838	6.6322	6.59839	5.92651	6.4019	5.49549	5.44901	4.43485	4.19398
Peak_717	Chr1	4038369	4038723	1.36597	1.08351	0.671407	1.92161	1.4169	1.61601	2.60691	0.926078	2.38928	1.08814	1.1576	1.85216	3.09773	3.74598	1.52803	2.21796	1.18075	2.03737	1.29188	1.56507	2.12535	2.74119	2.39854	2.43559	2.73656	2.09294	2.24111
Peak_718	Chr1	4042330	4044010	2.34883	2.54342	3.54671	4.82869	6.53897	6.80397	5.40368	5.60023	5.30491	2.91892	3.03333	2.91403	3.7902	3.35407	3.95937	3.86061	3.64156	4.14321	2.08383	2.59329	1.99484	2.43097	3.43426	2.97857	2.67641	2.07992	2.59329
Peak_719	Chr1	4053158	4053937	3.0094	3.83761	4.18534	5.83334	5.58888	5.01777	4.62158	6.56462	6.32015	4.44666	4.90607	4.72905	4.08208	5.05149	4.71851	4.8555	5.52566	4.54149	4.50566	3.82497	6.4466	5.44347	5.44558	6.85334	2.62163	3.46671	2.57948
Peak_720	Chr1	4058121	4058684	3.14477	3.17391	4.26977	4.26977	2.12177	3.56154	4.38635	3.86465	3.64898	3.68686	3.42164	3.8151	4.14153	5.03337	3.97249	2.66096	3.85299	2.96407	4.66906	4.51167	3.71601	4.00455	3.38667	3.02527	2.67553	3.41873	2.85914
Peak_721	Chr1	4062515	4063440	7.0651	8.33078	7.30474	9.71362	9.2858	7.00296	6.62664	6.58048	5.44438	8.16746	6.42781	8.76923	7.48226	7.19468	7.26036	10.3509	7.15563	10.0953	7.59054	8.72308	7.86568	9.31954	8.63966	8.69824	10.6296	8.97516	8.73373
Peak_722	Chr1	4072636	4073496	5.67212	6.01386	6.05586	6.90353	7.398	7.293	9.10098	9.01888	9.11052	5.54993	9.59353	8.50913	8.80888	8.81651	7.49728	7.7722	6.98181	7.23191	9.16397	8.68477	7.73019	8.14831	9.15253	7.44001	4.96573	5.9394	5.45256
Peak_723	Chr1	4076265	4077070	5.01498	6.36917	7.446	8.36578	6.01023	6.63633	4.27467	5.07617	5.30458	7.50921	5.75326	6.71383	5.72675	7.01363	7.27468	7.06054	8.51466	7.24205	7.15027	7.89671	8.51058	7.53165	7.5235	7.01975	6.72607	5.76754	6.96876
Peak_724	Chr1	4089389	4090767	3.13381	4.22331	4.56542	4.77879	3.66187	3.89073	6.07809	6.30934	5.42367	6.38204	4.39734	5.01957	5.8969	6.42019	7.19738	5.02196	6.86482	6.26166	4.24715	4.75018	4.76329	2.67488	3.59154	4.07312	2.08007	2.91805	2.90732
Peak_725	Chr1	4105197	4106862	6.27028	5.01425	4.63635	5.73254	7.73449	7.30528	4.92841	5.58553	5.45035	4.08875	6.01966	5.88646	4.72121	4.83072	4.94123	5.53521	6.64225	4.78041	7.43651	5.15336	4.10552	7.34377	8.1706	6.43604	6.31566	6.41433	6.45083
Peak_726	Chr1	4116609	4117589	3.88075	3.85897	5.26482	4.30301	6.88179	4.60127	6.65894	7.00076	6.81477	4.10193	5.70215	4.8258	5.24303	6.35397	6.56677	5.04196	5.49103	3.86399	5.0872	4.6884	5.2866	5.93507	5.91161	5.92501	3.37973	3.51881	4.44376
Peak_727	Chr1	4121235	4122261	6.54795	6.38469	7.18337	6.10139	6.41349	5.01139	8.6447	9.03044	7.86521	7.59952	8.63029	8.80475	7.57551	9.40336	7.17537	7.13696	6.91128	7.34663	7.63153	8.05728	6.82484	9.57623	9.63225	10.3989	8.36939	7.5371	7.265
Peak_728	Chr1	4140311	4140743	0.774441	0.379628	0.19361	1.86397	1.65897	1.86777	2.12971	1.06296	1.74249	2.32332	2.47897	1.94749	2.49036	2.80545	1.86397	1.71971	1.29073	1.74249	2.72193	2.35369	1.16925	1.47675	2.91175	1.49194	1.35527	2.12592	1.74629
Peak_729	Chr1	4144878	4145769	3.3705	3.92335	4.69917	4.79868	6.93818	5.40497	4.11684	6.15131	5.639	5.32757	6.57147	6.2416	5.40681	5.39759	4.62546	5.7551	5.86752	5.60952	5.72377	5.43998	3.68194	5.79749	5.51185	6.0905	4.12053	3.75934	4.49646
Peak_730	Chr1	4147916	4148665	5.06068	3.26347	3.28539	4.07002	6.3231	6.61022	5.876	5.29738	6.69131	6.2705	6.02284	6.54447	5.02999	5.63271	6.45241	5.58669	4.47111	6.0338	4.86342	7.0924	6.5883	6.92364	8.84797	6.96528	3.86619	4.56535	4.87219
Peak_731	Chr1	4153521	4155304	5.14882	5.96334	6.24437	7.48458	7.27173	7.91856	8.36453	7.71033	8.26962	6.53553	5.63347	6.70231	6.76957	6.8138	6.20014	6.71245	6.28399	6.5383	6.29781	7.91856	8.02821	6.1292	5.96795	6.06193	5.31006	5.50632	5.15619
Peak_732	Chr1	4157660	4158514	4.70258	3.95086	2.582	2.92806	4.20079	3.17222	4.83139	4.91214	4.67951	4.86792	4.93905	5.09094	6.30215	6.57707	6.24063	3.36833	3.67209	3.29911	6.31945	6.07913	5.46583	4.88138	4.20848	3.62787	4.7468	5.11401	4.56223
Peak_733	Chr1	4158914	4160193	7.6449	8.27545	10.4111	9.56223	9.24887	9.25401	6.95913	6.72798	7.43172	6.67018	9.37601	8.68639	8.87389	9.8242	8.90599	7.73351	7.74892	8.5156	5.82903	7.78744	7.50235	8.75318	10.4997	7.92486	6.22199	6.95271	5.71602
Peak_734	Chr1	4171916	4173054	6.27497	5.98201	6.84792	6.93018	7.48436	7.91876	8.1439	8.20451	10.4718	6.55062	8.05586	7.88268	8.5682	8.58262	9.02135	7.7297	8.9694	7.6893	7.43385	7.69651	6.94894	9.4038	9.96664	10.1153	4.99198	5.04538	7.02687
Peak_735	Chr1	4176383	4177768	6.1482	5.9027	6.1482	5.69989	6.30593	6.51229	5.32749	5.95844	5.0808	5.16738	5.66787	5.29665	4.46527	5.49827	5.16382	6.66529	7.23101	7.15155	5.3097	4.60047	5.39153	7.1646	7.88805	7.00686	6.09601	5.56469	5.30139
Peak_736	Chr1	4181962	4182693	2.29053	3.50989	3.04505	3.49193	4.52715	3.31901	5.2727	5.08856	3.65586	3.89389	3.90736	3.13038	3.20674	3.43579	4.21501	3.48744	3.7906	3.32126	4.75845	4.79438	3.09894	3.59747	4.91789	4.26217	2.2501	3.08323	3.61543
Peak_737	Chr1	4185480	4186279	2.24583	2.26637	4.00263	5.7245	5.08136	5.09163	5.66285	5.23958	5.97311	3.75811	4.76288	5.47792	5.64642	6.03476	6.58748	5.17794	5.45327	4.4485	4.08687	5.34437	4.28618	4.71356	5.23958	5.44916	4.40124	3.52182	3.62661
Peak_738	Chr1	4187004	4188180	6.98017	7.54998	7.49551	6.41036	8.43681	9.36833	9.16164	8.47592	9.30409	11.6741	13.533	11.6308	9.97725	10.878	10.3264	9.23287	9.51917	10.5876	8.67842	7.89493	10.406	11.5023	11.1113	9.41163	6.76648	7.26507	6.98016
Peak_739	Chr1	4189465	4189978	2.29619	0.486101	0.489299	1.17048	2.96138	1.92521	1.31759	1.44551	2.6064	0.87626	2.88782	3.00615	1.33038	0.978597	1.3048	2.20664	2.60959	1.20246	2.95818	3.28118	1.10332	2.71513	2.79828	2.26101	4.41008	2.1203	3.67134
Peak_740	Chr1	4194616	4196302	6.85188	6.64239	7.04481	7.456	6.95321	7.89349	6.2614	7.20948	7.50861	7.59046	8.10006	6.79341	7.84575	9.50708	7.70251	8.9205	9.24692	9.34241	7.34881	8.10006	8.72464	7.78827	8.23064	7.76196	7.29717	5.87652	6.59951
Peak_741	Chr1	4198339	4199121	3.2183	2.68297	4.20289	5.62205	5.7816	6.59405	7.85366	5.26306	6.4303	4.85159	4.69624	4.32885	5.65774	5.10141	5.48349	5.20638	4.43802	4.12732	3.99506	4.84529	4.02025	5.67454	4.92507	4.60387	4.4968	4.02235	3.48701
Peak_742	Chr1	4200922	4201699	6.58361	6.26457	7.54284	7.01251	9.39156	8.56122	8.1788	5.76805	7.70129	7.00406	9.17394	7.21745	10.1902	8.97745	7.17942	7.84709	7.76468	6.15259	5.96454	7.2745	6.08709	6.92377	9.78878	9.58173	5.40253	6.24767	5.86101
Peak_743	Chr1	4208330	4208929	2.59993	2.36432	2.34788	2.54513	3.35333	2.43555	2.86019	2.09583	2.80266	1.81639	1.62735	2.18624	1.90953	1.41092	1.63009	2.73691	2.43555	2.1561	1.90953	2.6602	2.38075	2.6328	2.07391	3.23552	3.22456	3.07389	3.66565
Peak_744	Chr1	4215697	4217224	7.10659	7.67568	8.71811	9.06451	7.9543	8.15547	8.44593	7.25505	7.40995	7.88868	6.55901	7.6477	7.3992	6.86561	6.48801	8.25229	9.10646	8.2297	6.36753	7.55411	6.22014	6.78278	6.63863	7.14962	5.63707	5.31972	5.48646
Peak_745	Chr1	4220056	4220815	5.33366	4.96165	6.28533	7.98103	8.3379	8.16054	5.40504	7.92479	8.0524	7.36893	11.1842	8.08484	7.6912	7.42949	6.7179	6.94933	8.02861	8.76399	6.91256	7.83178	7.66524	7.4468	9.65942	9.81299	6.3978	7.02071	4.70426
Peak_746	Chr1	4221927	4222286	1.62552	2.74878	1.5753	2.56157	2.68029	2.3424	3.11863	2.77161	4.26015	2.17802	1.5753	2.08213	2.20998	1.39722	1.22827	2.19172	2.94969	2.45655	1.57986	2.75334	1.63009	3.03188	2.20998	1.47941	3.45195	2.06843	1.89949
Peak_747	Chr1	4222906	4223735	5.65622	5.34528	6.47811	5.99092	6.40087	8.00505	6.26224	7.10592	6.66625	6.10578	5.89189	6.49197	6.20877	7.89612	6.39493	5.28191	4.24216	4.88186	5.70375	5.59878	5.63443	5.87011	7.74759	6.63259	4.37089	6.79895	5.24428
Peak_748	Chr1	4227420	4229107	2.78022	2.12485	1.47922	2.16575	3.70534	3.00517	2.1453	1.29127	2.03331	0.844291	2.11219	1.19389	1.62918	1.40423	1.24161	1.98754	1.19778	1.98365	2.48516	1.5766	1.40326	1.43345	1.48408	1.37307	3.17267	2.88053	2.87176
Peak_749	Chr1	4237840	4238771	4.6333	5.42697	4.92255	5.59276	7.02314	9.11667	5.98607	6.7092	7.64044	4.86611	6.78856	5.49575	5.42874	6.30354	4.35286	5.6104	7.28241	5.70035	6.41289	5.43931	5.42344	5.48694	6.44111	5.86438	3.33872	6.49402	5.66683
Peak_750	Chr1	4241629	4243028	5.51256	4.3807	3.42965	4.21984	5.31765	4.37952	4.74468	5.46677	4.17874	3.36624	5.51726	4.848	5.18968	4.31142	4.92549	4.45819	5.38811	4.15409	5.3881	4.01202	3.53297	5.30474	5.37402	5.84132	6.11606	6.51527	5.70277
Peak_751	Chr1	4244219	4245151	4.27244	5.35421	5.42468	5.84047	7.32393	8.62592	7.30455	7.87539	8.06037	6.93985	8.72811	7.47545	7.64811	8.87963	7.1777	7.81725	7.83487	7.61464	5.2714	8.10266	8.7933	8.90606	8.12909	8.10266	6.702	5.84752	5.86513
Peak_752	Chr1	4247336	4248512	4.86433	4.91042	4.98164	4.16045	5.62687	4.35736	5.15063	6.05423	5.41877	4.04872	5.61569	5.18554	4.19117	5.36431	5.03331	5.11991	5.21069	4.98583	4.35876	5.13247	5.23023	4.01241	5.84753	4.96768	5.36291	3.34763	3.2359
Peak_753	Chr1	4250879	4251629	4.13902	5.24874	5.96448	5.8047	7.08733	6.58828	6.91661	7.06982	6.84218	6.01701	5.37569	6.71742	5.78719	7.08952	5.39539	3.00522	6.37597	4.21125	5.63835	6.65176	5.85504	5.69964	7.62359	5.472	4.41481	5.66243	5.05394
Peak_754	Chr1	4263509	4265168	12.7522	12.7532	14.0019	12.978	14.5426	13.3226	12.5562	11.9115	12.2215	10.7539	17.6836	14.2455	13.2959	13.8682	13.0523	13.8157	13.5464	13.9326	13.1067	12.1819	11.0926	16.5379	15.6338	15.5813	10.1301	13.6355	11.5461
Peak_755	Chr1	4268012	4269069	6.7849	7.0801	8.2407	6.90764	9.66541	9.13095	7.68603	8.93364	6.88433	7.45298	8.83419	8.87304	7.72954	9.09366	7.63942	10.088	9.18378	8.89479	8.0325	9.12318	9.45411	8.17389	10.2387	9.66697	7.26654	8.90256	8.16145
Peak_756	Chr1	4270238	4270930	4.99778	4.52813	4.85309	7.18476	6.09601	8.22368	6.16955	6.96416	5.99876	5.56468	7.01397	6.18377	5.0808	6.71984	4.02764	5.13536	4.74872	3.82602	5.23735	4.51152	4.27195	4.52813	5.58366	5.0049	3.26623	5.07131	4.6823
Peak_757	Chr1	4274510	4275357	4.80925	7.01906	6.72248	6.34448	6.15451	8.29066	6.96866	7.21678	7.21677	7.26135	9.004	8.9885	6.52476	8.35657	7.21289	7.94563	10.076	8.24221	7.92042	8.45737	6.90081	9.12613	8.91096	8.6454	5.98975	6.83878	5.95098
Peak_758	Chr1	4282832	4283596	6.09813	6.0788	5.99285	8.59497	7.32936	6.34524	9.07414	7.21548	8.70026	5.53946	6.97267	5.18491	6.25284	7.11663	6.34953	5.62541	5.70062	4.11699	5.00227	4.51451	5.68342	6.82011	7.53779	6.9297	4.41567	6.01218	5.57813
Peak_759	Chr1	4290297	4290778	1.29252	1.56535	2.43499	2.72146	2.78284	2.25424	4.00034	4.59715	3.20573	0.825304	0.173928	0.828715	1.35391	1.978	2.38383	2.01211	1.60286	2.5032	1.15611	1.15952	1.36073	1.13565	0.347856	1.2175	1.85182	1.08108	1.19703
Peak_760	Chr1	4296421	4297197	6.19647	4.79809	4.79809	5.9151	6.14992	5.9976	5.03503	6.83114	5.21273	4.57383	7.64985	6.95172	5.82625	6.2832	5.62738	4.90598	6.67036	5.05618	5.60199	4.41517	4.44902	6.04627	6.42918	5.5618	4.11053	4.33478	3.82704
Peak_761	Chr1	4305025	4306507	6.85115	8.46834	8.11808	7.07949	8.11586	7.06396	8.53041	7.78001	6.86667	7.66584	7.80106	6.99524	6.88441	7.75229	8.05933	7.73013	7.7656	6.3834	6.23376	6.66826	6.59178	8.89286	8.94829	8.81749	7.6614	7.50956	6.64276
Peak_762	Chr1	4322160	4323076	5.82048	6.89782	6.88348	7.30294	8.33187	7.40511	8.03969	8.49321	7.67937	8.54339	10.3629	8.4448	9.33751	9.43609	9.01305	6.51959	6.75979	6.76338	9.01305	7.66683	6.82432	10.3915	9.37336	9.69423	6.14852	6.23815	6.40127
Peak_763	Chr1	4325710	4326385	3.84442	3.4432	3.58424	4.52771	4.69793	4.18485	6.69431	3.96844	6.96908	4.0657	3.43347	3.21949	3.72284	3.38727	3.96357	3.69853	3.1587	3.31433	4.09245	4.46449	2.4365	5.86512	4.22376	5.80676	5.20857	4.83653	3.66934
Peak_764	Chr1	4327192	4328626	5.81225	4.91877	5.67823	5.61637	7.22694	7.72294	7.25673	6.94973	7.37356	7.7699	10.6944	9.98415	11.0266	13.038	10.5008	7.65994	9.18574	8.85584	7.61068	7.82489	8.72296	9.75162	11.3358	9.21095	4.79047	6.95202	5.65646
Peak_765	Chr1	4334468	4335350	3.51283	4.47528	4.8569	3.42534	5.54569	5.64994	6.07625	5.35581	5.4917	7.85034	7.66605	6.45601	7.55249	8.66014	6.86928	6.59005	6.66079	5.55686	5.82307	5.85844	6.90465	6.17677	5.7877	6.85253	3.70271	4.70425	4.49575
Peak_766	Chr1	4347870	4349709	7.15852	8.42889	8.60309	9.32136	10.6274	10.9598	9.1945	8.59058	8.99348	10.0012	10.6614	11.5539	8.56021	10.631	9.33296	8.6692	11.1528	9.26329	8.88807	7.766	7.65433	9.72248	9.95564	10.3443	7.49531	9.15162	7.16745
Peak_767	Chr1	4351133	4351763	2.99581	3.41783	3.18859	2.63371	3.98052	3.96228	3.03228	2.69623	2.93589	2.97236	5.13195	3.63144	4.23321	4.28792	3.54027	3.41262	2.8864	2.39144	2.84211	2.36799	2.5243	4.34523	3.21985	4.1733	1.72715	5.01473	2.02673
Peak_768	Chr1	4353777	4354486	3.13014	4.34794	4.62808	3.54225	4.98461	3.41723	5.27402	6.13295	4.23449	6.25797	6.10748	5.3782	5.11427	5.23697	5.76252	4.27617	6.18852	5.09806	4.87348	3.41491	3.29915	5.22077	6.68165	6.22093	3.3061	4.13262	4.01455
Peak_769	Chr1	4357027	4358365	3.01382	2.4933	1.64747	2.24287	4.24635	3.45085	5.46784	3.63131	3.81914	6.04359	7.38784	7.29577	5.7907	5.06886	5.00134	4.50784	4.82334	4.21198	5.96625	5.67899	4.37157	5.43347	6.2572	5.95643	5.19776	3.63131	4.50415
Peak_770	Chr1	4360706	4361358	4.13339	3.59469	4.10821	3.75579	4.42539	3.49399	4.63181	3.46127	5.59593	2.43925	4.64188	3.43106	3.72559	4.27687	3.75327	3.51162	3.36813	2.74133	4.95905	3.85145	3.15668	3.19444	5.09499	3.85145	3.41092	3.62238	4.07297
Peak_771	Chr1	4364328	4365528	7.2855	8.0725	8.89234	9.78746	10.1543	8.94845	9.42612	8.0287	9.74365	10.5416	11.2177	9.37684	8.18473	11.0713	9.912	8.18747	8.74315	7.77139	9.60952	9.66427	8.73767	7.61399	8.75273	9.58489	8.40645	8.33255	7.4032
Peak_772	Chr1	4367234	4367996	5.26314	5.71341	5.77588	4.63622	5.40963	5.30838	4.11486	5.38163	4.6039	6.64409	7.55539	5.38594	6.36834	7.14175	5.82327	4.83442	6.17875	5.65955	5.09079	5.79527	5.48719	6.97802	7.93672	7.63295	6.75181	6.94355	5.7134
Peak_773	Chr1	4369674	4371446	10.3402	11.9617	14.7922	11.2015	12.1805	13.7464	12.684	12.1194	12.9556	12.4874	12.2352	12.3354	11.1635	13.0029	10.8575	12.5857	10.89	11.501	10.6239	11.0587	9.83491	13.74	12.5273	12.4846	9.12566	11.1468	11.017
Peak_774	Chr1	4374124	4375285	6.8892	6.14653	7.3631	7.87378	8.3024	8.72962	8.99557	9.39874	9.93346	8.75932	7.04198	8.38728	8.87391	10.1145	8.02655	9.84434	8.91211	9.37328	8.00675	9.07478	8.1864	8.71406	9.65196	8.34909	5.98808	7.20042	5.6995
Peak_775	Chr1	4375409	4376401	5.73754	6.83339	8.57651	8.17922	8.84467	8.18914	8.34972	8.32158	8.87447	8.78673	10.2352	9.20223	8.36296	9.61276	9.7154	8.33151	8.80991	9.74024	6.47086	7.33497	6.90126	9.80148	11.341	10.3875	7.16943	5.70443	6.80194
Peak_776	Chr1	4380700	4381748	9.22183	11.027	13.6282	10.0649	11.5473	11.6695	11.6664	9.93638	11.3937	10.1009	15.7656	14.1939	11.8231	14.6249	10.7308	12.5501	13.8758	12.4405	12.3135	8.87081	11.3686	12.0221	11.6632	10.1276	7.99172	10.6321	8.84261
Peak_777	Chr1	4384338	4385973	6.50281	6.9228	7.47241	6.12	8.95442	7.0715	9.02878	9.12423	9.77531	8.58467	8.11042	9.05189	8.74443	10.4284	10.4455	9.40557	10.2677	9.49801	7.75173	8.22396	10.2827	9.02577	9.42466	7.71355	6.61032	7.00218	5.89292
Peak_778	Chr1	4392454	4394472	10.462	13.5118	15.2973	11.43	13.3433	12.1839	13.4809	11.5415	11.7101	13.0298	11.9559	13.4157	10.8137	12.1668	9.2057	12.578	13.7446	13.4613	9.50857	11.8192	12.3109	13.1438	10.7127	10.4636	10.9203	11.8599	11.8753
Peak_779	Chr1	4395269	4396392	5.87464	6.09547	6.44939	6.42014	8.38712	8.30522	7.66468	8.55384	7.19523	9.44008	9.94755	7.63689	11.8049	9.43277	8.91799	7.73195	7.75681	8.72934	8.02736	8.2789	8.45147	8.12242	7.73049	8.35349	6.09986	5.94484	5.0586
Peak_780	Chr1	4397355	4398258	4.915	4.855	5.87509	5.65689	8.36623	6.63152	6.28967	6.56061	5.00773	4.3004	6.70607	5.07683	7.10975	4.44041	8.00256	5.74599	5.74417	5.35504	4.75498	3.44395	5.75871	6.99338	7.24613	5.22412	3.7258	4.11129	3.86763
Peak_781	Chr1	4404621	4405691	3.75723	4.70882	5.0388	5.77705	8.09155	6.45851	7.04481	9.08765	7.58966	6.16229	8.1775	6.31884	6.56748	7.9749	7.41009	7.50065	7.31954	6.50916	6.54599	7.37019	6.56134	8.45991	7.14304	8.73157	4.84388	5.23833	4.89606
Peak_782	Chr1	4416439	4416973	0.854156	0.783488	0.156698	1.34883	0.783488	0.470093	1.13375	1.45329	0.669805	1.9111	0.92175	1.48402	0.857228	0.783488	1.14604	2.23064	2.03707	1.10917	2.24907	2.60548	2.19377	1.3181	0.626791	1.11839	2.79905	1.40721	2.95267
Peak_783	Chr1	4423498	4424621	5.52219	4.79536	5.04251	4.96793	6.61902	5.74887	8.35349	6.84425	6.5108	7.75973	8.97064	9.84518	8.96187	9.19878	7.79483	6.59271	8.50266	8.06393	6.70677	7.83139	9.32308	8.75859	9.15783	8.46317	4.99717	7.38389	4.77342
Peak_784	Chr1	4433536	4434947	7.26666	11.3086	11.9838	12.1387	11.2865	11.4471	11.5775	13.0153	12.2865	9.03734	10.992	9.66133	12.7347	11.8173	11.5775	10.4052	10.1305	9.27949	9.67646	8.96516	9.67413	9.98613	9.85458	9.26086	7.44012	7.81615	8.27133
Peak_785	Chr1	4438705	4439555	4.33644	4.92171	4.54698	5.12259	5.61901	5.08396	6.03238	6.20622	6.91898	5.32927	7.41153	6.2661	4.67446	6.48243	5.67116	3.82263	5.93387	4.23986	4.42335	5.01829	4.04476	5.4162	6.53459	5.71366	3.19679	5.17282	4.47937
Peak_786	Chr1	4442203	4443834	9.06703	8.57852	9.76	10.7169	9.2866	9.22012	10.2737	9.89597	10.9999	11.8077	12.3224	11.4682	11.4531	10.9928	9.68143	10.6685	11.301	11.6757	10.731	8.43448	10.1871	10.5577	12.3304	11.7009	9.83251	9.29164	9.34904
Peak_787	Chr1	4446727	4448107	2.72814	2.90073	2.96144	4.98493	5.16228	4.9754	3.90772	4.29575	4.3386	4.09221	4.9266	4.94089	4.88137	4.36241	5.36463	3.7256	4.04698	4.25766	4.39573	4.06483	3.72798	4.1303	5.19323	4.38264	4.12792	3.29948	4.12792
Peak_788	Chr1	4452160	4452908	5.12669	7.02945	7.3367	5.19692	5.78288	6.88899	6.22401	7.51885	6.28326	5.48441	7.02505	8.07409	6.39081	5.74997	6.01113	5.48442	7.04262	6.15159	7.10187	6.17573	5.03451	7.72515	6.48737	5.32201	5.243	5.66877	5.14863
Peak_789	Chr1	4459132	4460744	6.08192	7.45667	7.94991	7.16623	6.44471	8.89357	8.70097	7.28648	8.53486	5.85364	3.22235	3.66362	2.27257	3.98973	2.91153	3.22236	3.80222	4.14565	4.26182	4.98945	6.83706	5.41238	5.5418	5.62638	6.98992	6.20828	8.39422
Peak_790	Chr1	4461712	4462942	5.85675	5.76728	7.95856	7.8998	7.6581	7.91048	8.55545	9.08824	8.35915	9.34863	9.45412	8.41523	11.4558	11.0351	9.47415	10.5451	10.2006	9.6838	8.28437	8.57013	8.01597	7.99594	8.71035	7.64342	5.83805	5.85675	7.02382
Peak_791	Chr1	4464004	4465402	2.34642	1.80124	1.34182	1.05278	2.53324	1.08803	2.09733	2.25478	2.69656	2.43924	3.10663	2.53089	3.16891	2.32527	3.12425	2.4839	2.63664	3.03966	1.77186	2.68129	2.80466	2.39695	3.07138	2.5074	2.23245	2.41927	2.14785
Peak_792	Chr1	4467222	4468887	5.14547	4.4627	3.60726	3.62305	5.15632	4.87414	4.38771	4.02659	3.92496	6.12918	5.95256	5.65656	5.07838	5.83712	5.24216	6.21502	6.51004	6.31566	7.90321	5.61216	6.55542	7.32996	5.38425	6.79321	4.88104	6.2683	5.73648
Peak_793	Chr1	4472507	4473339	4.09862	3.02315	3.92497	5.16225	5.34182	5.3655	5.4247	5.63979	6.09366	5.69899	7.1711	7.61313	7.57958	6.51595	4.89979	6.50609	5.56283	5.55494	5.63584	4.22491	4.91558	7.19281	6.36006	7.08822	5.032	5.68123	4.13414
Peak_794	Chr1	4478057	4478544	3.09221	2.69474	1.664	2.88	2.13895	2.57684	3.18653	3.43916	4.64168	4.77978	1.71116	3.77936	3.06863	1.80884	2.07495	2.40505	3.13263	3.71874	3.20337	2.14905	2.21979	2.10863	3.18316	2.61389	2.92042	3.89053	2.79916
Peak_795	Chr1	4480693	4481458	4.49145	6.01936	4.20604	5.48931	9.09877	8.38632	7.25542	7.25542	7.20176	6.05369	6.0215	7.57945	6.14597	6.34768	6.27901	5.90991	6.15455	7.44211	6.35197	5.65884	6.06871	6.29189	5.19103	5.80047	4.85626	5.3627	3.9335
Peak_796	Chr1	4484514	4485431	6.27254	5.71208	5.42916	4.69501	4.54459	5.66373	6.73631	7.79099	6.27791	4.6574	5.82309	5.23935	6.56083	6.48383	6.42295	4.01815	5.72282	4.7344	4.89555	8.40158	6.0881	6.36028	8.15806	7.71578	4.47655	7.67102	6.21524
Peak_797	Chr1	4491723	4492655	5.45992	4.70409	3.92888	4.94194	7.73444	7.38912	6.61568	7.66925	7.00856	7.53359	6.79186	6.38664	7.7133	9.75702	9.15976	5.8669	6.93105	6.79538	6.62448	6.46944	5.26259	7.08256	8.18723	6.66325	5.20269	5.01065	5.35773
Peak_798	Chr1	4494946	4495774	3.33715	2.9029	4.11641	4.86792	4.90559	4.38013	5.56588	6.48593	6.15082	3.99347	6.11909	4.83024	5.83555	7.84418	5.45285	5.03051	5.80977	5.04042	5.69675	5.81968	4.15408	5.66304	4.11443	4.14616	4.74696	4.55066	3.69406
Peak_799	Chr1	4498770	4499786	5.16412	6.18401	7.31866	7.5207	7.88275	8.48563	8.5018	8.3628	8.44522	6.15976	7.54979	7.61444	6.92751	9.26792	7.30411	6.16138	8.13975	6.42969	6.39574	6.66082	6.51211	10.3072	9.67039	9.00609	5.11562	6.26482	6.45554
Peak_800	Chr1	4502704	4503657	5.18466	4.83488	5.98587	7.86055	6.84912	6.3098	4.9934	5.97553	5.91695	3.89753	7.02142	5.12779	5.28287	6.37183	5.72741	5.62403	6.74918	5.27253	5.76876	3.83206	3.10493	6.39251	7.02832	6.79743	4.21802	6.23916	5.3604
Peak_801	Chr1	4512363	4513980	5.44035	5.87213	6.39229	6.68285	8.93213	8.63751	7.58805	8.02896	7.88266	6.3486	7.39095	6.61985	7.21317	7.12173	7.45394	6.27444	5.71364	5.95645	7.18268	5.87822	4.79116	5.80101	6.06617	6.01029	5.81625	6.10782	5.82133
Peak_802	Chr1	4515507	4516209	3.0935	3.69677	3.80901	5.73339	4.24158	4.04751	6.72714	7.76766	6.91186	5.24001	4.41461	5.47851	4.97813	5.06231	5.18623	5.27509	5.81522	5.12778	5.14181	4.78405	4.67416	3.97035	4.42631	5.14415	3.84408	2.9953	3.77393
Peak_803	Chr1	4525291	4526163	7.04024	5.51695	4.54349	6.06112	6.70319	8.1907	6.46971	6.43394	5.91048	9.68385	5.1479	7.87625	4.18008	3.92777	5.08953	6.03664	6.30966	6.33226	5.39833	8.40346	7.02893	5.0274	6.56386	7.7388	6.52996	7.16263	7.29819
Peak_804	Chr1	4528901	4530164	5.96914	6.45031	7.38925	9.65856	8.68711	8.6728	8.06029	7.65454	7.14215	8.74043	8.97971	7.69095	8.05899	9.01612	7.45687	9.52331	10.3751	9.61695	8.24885	7.36974	9.29963	7.36194	7.68445	6.79363	8.09149	6.59596	5.82218
Peak_805	Chr1	4542230	4543865	7.76077	6.78716	6.76405	7.08859	7.6613	8.30937	9.73513	9.6236	9.79943	7.5568	7.52666	7.0715	7.82005	6.61836	6.57113	7.89139	6.65051	6.76405	7.56584	7.22523	7.5357	6.29684	6.67664	6.42545	8.00191	6.33301	7.27647
Peak_806	Chr1	4544849	4545596	4.48306	3.34471	2.11187	2.35361	6.04993	4.59513	5.5379	5.23463	5.01048	4.67425	3.07881	3.94245	6.32243	6.20156	6.2565	4.18199	5.04564	3.27	6.38836	4.77973	4.27868	3.6304	4.95994	3.84796	2.49425	2.60853	3.72709
Peak_807	Chr1	4547545	4548652	4.33942	4.42844	4.0887	4.62575	5.62864	4.30085	5.36902	4.31272	4.38838	4.61091	4.79933	5.6138	5.61381	4.4225	4.99812	4.88389	6.08706	4.5219	4.46404	4.76372	4.45662	4.69251	5.70875	5.94909	4.19255	3.79051	4.60795
Peak_808	Chr1	4567236	4568325	2.0766	2.37369	2.01477	3.53339	3.73245	3.09153	3.60126	2.92866	3.31472	4.04915	4.24972	3.61483	2.31639	3.79881	3.23027	2.53355	2.9362	2.39028	3.61483	3.26948	2.91207	4.21051	3.6842	3.6842	3.12621	2.72809	2.87286
Peak_809	Chr1	4575824	4576745	7.03335	5.11678	5.63738	8.86077	7.29364	7.01373	7.18311	8.10306	8.27421	7.42557	6.72848	10.271	7.62882	7.12783	7.72152	7.70905	8.52381	7.37031	7.52363	6.85506	7.19023	7.82315	8.00679	7.86951	7.19202	8.02996	8.046
Peak_810	Chr1	4576874	4577909	4.66481	5.05195	6.14517	7.12732	6.25306	6.28796	5.82149	6.34509	5.2598	9.72151	6.32128	7.39704	7.72073	7.28756	7.48114	7.56206	8.57753	8.42045	6.01347	7.44465	8.65686	6.14358	5.09321	4.28877	7.23838	6.16738	7.4018
Peak_811	Chr1	4589730	4590566	5.60891	4.31666	5.58535	6.84421	6.60068	7.10541	5.90939	6.99347	5.79155	4.19097	6.00955	4.22632	4.79979	5.53428	5.54999	4.407	3.97691	3.7707	4.57982	5.29861	3.67839	6.07632	7.18593	5.39681	4.72515	5.30844	4.60732
Peak_812	Chr1	4592765	4593805	4.79557	5.34981	6.79938	6.45357	7.8147	7.49416	6.76938	5.94354	6.16144	5.18243	5.56772	4.91241	6.30988	6.2704	4.78293	5.2077	4.16079	5.80932	5.52035	5.79826	4.67082	7.16572	7.09308	6.60358	6.35251	6.14881	6.20092
Peak_813	Chr1	4601283	4601705	1.16581	1.11529	1.08032	2.56089	2.20726	2.37436	1.78369	1.38731	1.98187	2.37825	1.98187	1.92747	2.46763	2.23835	2.81348	1.81089	3.26426	1.38731	1.23187	2.61529	2.37825	1.79923	1.52332	1.45337	2.22669	2.35105	1.10752
Peak_814	Chr1	4608545	4610750	6.11838	10.7271	12.4663	11.6243	12.1488	12.3992	9.45961	9.69061	9.83367	8.14517	9.22935	7.86276	7.29646	8.0945	7.25845	8.74502	9.18614	8.80165	7.41046	7.78303	7.60494	9.76214	9.95662	10.508	6.15191	6.84043	6.14371
Peak_815	Chr1	4614316	4615291	5.14358	6.96926	7.79116	5.99916	7.10568	5.58989	6.7621	7.8501	7.55873	6.56505	8.24252	8.12631	6.45558	9.02904	8.40252	5.58316	5.94526	5.25474	7.67831	8.63494	7.05347	7.96126	8.39747	7.33137	5.08126	6.27705	6.11536
Peak_816	Chr1	4615758	4616574	6.23111	4.59134	4.77644	4.10042	7.83063	5.48868	8.90704	8.13243	7.7763	3.45457	5.17079	5.96351	4.92533	5.39814	5.16475	3.62961	3.18899	4.32174	5.00178	5.47661	6.22909	5.13257	5.54502	4.93137	3.03004	5.33578	4.41227
Peak_817	Chr1	4641338	4642144	4.78878	5.02914	5.57911	4.67472	8.75668	8.0071	7.54065	8.88909	7.12919	5.49151	6.32461	6.14333	6.12092	5.21042	5.75631	4.57083	5.90501	4.4751	4.28363	4.57898	3.91087	6.17185	5.5017	8.25357	3.79884	5.11673	4.01068
Peak_818	Chr1	4643809	4644410	2.24724	1.72844	1.59191	1.97145	1.25332	3.1292	3.6917	2.36465	2.92441	1.71478	2.64044	3.25481	3.01725	3.69989	3.44868	1.88681	1.87042	2.43838	2.83977	2.76877	2.45476	2.25543	2.92442	2.95172	1.67109	1.68202	1.71478
Peak_819	Chr1	4646411	4646976	3.49959	3.55477	4.5393	3.59252	2.62251	4.24597	3.98169	5.3699	4.2024	3.64189	2.72125	2.41341	3.3718	3.33695	3.9933	3.49378	4.47831	3.32533	2.56733	3.56928	4.12399	2.77063	2.11137	3.20626	3.25853	3.89166	3.18883
Peak_820	Chr1	4672364	4673149	5.74908	6.36184	5.71771	5.04221	8.67903	5.97285	6.48523	7.11681	7.70656	5.6466	6.89931	5.96866	5.99376	7.9387	6.39111	6.11506	5.93939	5.41447	6.36184	7.83204	6.71109	7.3364	7.08962	6.67972	5.48138	5.52112	5.78881
Peak_821	Chr1	4678941	4679933	5.12008	6.98734	7.52865	5.96101	6.79366	7.94415	5.65642	5.36342	5.47598	5.7425	7.76868	6.34009	6.43114	8.35302	7.79185	6.57681	7.89449	6.36327	5.99411	4.24604	5.65642	7.46906	9.26845	7.78524	5.5422	5.43295	5.2343
Peak_822	Chr1	4681016	4682314	0.913638	1.16166	1.33882	2.64474	1.35527	1.38564	2.42582	3.08764	2.41949	1.98925	0.77444	0.956662	1.61342	1.35527	1.35527	1.15154	0.998421	0.981971	0.763052	1.78805	2.80165	1.01614	0.580831	0.851632	0.980705	0.632713	1.35654
Peak_823	Chr1	4693195	4694006	5.8808	8.56916	8.1906	8.27968	7.81609	8.2574	7.35859	8.96999	7.28773	6.19457	9.00642	9.46797	8.75338	8.04484	8.25538	7.99222	9.41535	8.75743	8.15416	7.20271	5.36863	7.83836	9.62993	6.9861	5.24514	8.60155	6.45774
Peak_824	Chr1	4695164	4696087	2.52439	1.06028	0.816557	1.76476	1.93732	1.65624	2.10988	2.17393	2.1508	2.16681	1.12788	1.90708	2.38919	1.2702	2.51194	0.999794	1.60287	1.31468	1.88573	2.91221	2.21484	1.33602	1.36093	1.63311	1.85371	2.26822	1.45166
Peak_825	Chr1	4709796	4710704	4.15016	3.1194	2.76677	4.98019	6.63121	6.26954	3.86444	4.03985	4.38343	2.80294	3.83731	2.89155	3.59681	3.62031	3.04345	3.2279	3.93678	3.47565	4.57874	3.76317	4.33823	4.63299	5.71257	4.68905	3.16461	2.88612	4.24238
Peak_826	Chr1	4713563	4714753	6.40539	6.07691	6.92986	6.62346	9.78406	8.64403	5.9941	6.40539	5.91267	6.61794	7.28594	6.60275	7.76211	7.99949	9.67364	8.74479	6.89812	8.35834	6.07001	6.75733	6.71869	7.06926	6.57102	6.17352	5.11907	6.34743	5.49033
Peak_827	Chr1	4717525	4718200	0.868096	0.744082	0.955635	1.67783	1.8602	1.61218	1.87966	1.24014	1.59272	2.828	1.93802	2.5289	1.89182	1.59029	2.3368	1.65352	2.10823	2.30033	2.12768	2.22009	2.38787	1.15503	1.84805	1.41278	2.27358	1.73619	1.61218
Peak_828	Chr1	4721611	4722343	4.63759	4.17114	3.07005	4.45146	5.56152	4.27878	6.96984	5.8239	6.07506	5.6288	5.66916	4.21375	5.09507	6.29035	6.4249	5.94051	4.80354	5.1175	6.34417	5.16459	4.49631	6.58861	5.64898	4.82597	5.59516	5.54134	3.77421
Peak_829	Chr1	4724479	4725120	3.7971	2.88047	2.16611	3.14932	3.71517	3.10835	4.04802	4.58571	5.0517	3.62043	5.12596	4.25285	5.19509	3.47449	4.02498	3.25173	3.35927	3.19028	3.57178	4.23749	3.66396	4.82127	5.14132	4.46537	3.98913	3.98145	2.9752
Peak_830	Chr1	4726834	4727290	1.2841	1.5179	1.33445	3.38469	1.05389	2.18692	4.30191	2.93508	4.01415	1.78407	1.12583	0.251784	1.69774	2.85954	2.87393	2.01787	2.60776	1.32726	1.77328	2.20131	2.73725	2.20131	1.61501	2.81998	1.83442	2.27685	1.25172
Peak_831	Chr1	4733361	4734643	2.7136	2.3997	2.76228	3.31448	2.98137	3.41698	4.35995	4.44323	3.97815	3.04671	3.9884	3.27476	4.44323	3.88974	4.11139	3.40673	3.30295	2.94037	3.777	4.34329	3.67706	3.83081	4.69434	4.59185	3.07105	3.19533	2.9109
Peak_832	Chr1	4735484	4736227	4.06087	4.94241	8.00021	7.07669	6.73423	6.61492	7.93614	8.17918	7.18052	4.32378	4.04761	4.79217	4.38123	5.38208	3.66317	5.30254	4.94241	5.2915	3.49305	4.84078	4.57786	5.67151	4.22215	5.32906	4.38785	4.79218	4.06307
Peak_833	Chr1	4746235	4746975	3.78892	2.75074	2.63317	3.74456	3.40293	5.20644	5.31736	5.41053	4.79161	4.37678	4.78052	4.55203	4.70731	4.92693	4.47882	3.49832	4.61193	4.66073	4.15273	4.186	4.76942	3.54047	4.2215	3.90428	2.84391	3.95973	2.73077
Peak_834	Chr1	4748130	4750032	4.29562	3.76093	4.26193	5.24751	4.41309	4.26538	4.77329	5.62326	4.69641	4.56253	4.50033	4.18764	4.51934	4.86917	5.02206	4.90459	4.1816	4.27402	4.31807	5.82538	4.48219	4.89336	4.21874	4.1911	4.08744	3.61236	3.9907
Peak_835	Chr1	4754501	4756654	6.22717	7.8618	8.22963	8.19529	8.80655	8.09913	9.5613	9.48269	9.7536	9.71392	10.851	10.3519	8.77145	10.0543	9.3148	7.70612	8.17545	9.31175	8.36317	9.53458	9.75741	9.02939	12.0651	10.0413	6.14932	7.04448	5.45487
Peak_836	Chr1	4758946	4759863	0.821894	0.456608	0.182643	0.182643	0.547929	0.182643	1.52561	1.18002	0.913215	2.7862	0.365286	1.09586	2.06996	3.05838	2.33139	2.00908	1.59723	1.59544	1.18718	2.13979	2.66802	0.821894	0.456608	0.821894	1.09586	0.54793	0.547929
Peak_837	Chr1	4760953	4762403	3.19582	3.4779	4.10211	5.19986	3.23546	3.10179	7.68423	7.98444	8.47837	9.35407	5.11489	6.66918	7.68536	8.98249	8.06034	7.04869	6.92181	6.33725	5.00387	10.6988	11.3332	3.50849	3.91292	3.80983	3.75545	3.40879	3.34988
Peak_838	Chr1	4765658	4766879	3.08715	4.52647	4.25475	5.59319	8.31445	8.01985	6.60071	8.43014	7.90014	5.34971	6.43525	5.21385	5.41563	6.04247	5.36182	5.66583	5.86491	5.05647	5.27707	4.1848	4.85469	7.0648	5.87164	6.81056	4.04759	4.09468	3.97899
Peak_839	Chr1	4773485	4774135	1.93164	1.04788	1.04788	2.5831	3.18152	2.88105	3.61583	4.35819	4.01731	4.72684	2.62855	2.87095	3.94156	3.64613	4.92884	3.60573	2.6942	2.9669	3.58048	3.50978	3.74965	3.65371	5.30002	3.73956	4.37081	2.72197	4.02993
Peak_840	Chr1	4776392	4777400	7.81003	8.33787	8.81358	5.04866	7.85239	7.16164	7.81329	9.40658	7.73346	8.72723	8.43887	9.29905	7.60639	7.65689	9.45056	8.22057	8.98789	8.47472	6.72992	7.14372	6.95474	9.80409	8.97486	9.53854	8.08698	11.2996	7.88823
Peak_841	Chr1	4788434	4789238	3.64492	4.16563	4.57198	4.67204	4.55564	6.08508	5.18253	4.58219	4.45763	3.76948	5.70527	5.303	5.10289	3.95734	5.17436	4.18605	4.58219	4.41475	3.03845	3.8532	4.19217	5.30301	6.16064	6.19739	3.74906	4.58219	4.68633
Peak_842	Chr1	4794629	4795493	4.70523	3.19826	2.03526	2.51984	4.71092	3.19826	6.75569	5.82262	5.40645	6.35471	6.44403	7.80657	6.2806	7.93009	5.91193	6.41743	4.80975	6.2673	5.59648	5.1499	6.90011	7.08825	6.86591	7.46641	4.94277	4.5646	4.71092
Peak_843	Chr1	4797315	4798375	9.66133	9.91696	9.51724	11.2106	10.0084	8.68062	10.0905	10.2346	10.5878	9.96963	11.979	12.8854	9.80076	11.5716	9.87047	8.53345	8.91147	9.00753	8.40485	9.57456	9.00288	12.9737	13.3641	11.6289	7.58528	9.4971	9.90766
Peak_844	Chr1	4801101	4801949	4.83843	5.33215	6.23439	6.30022	7.57614	6.17243	7.78718	7.46578	6.22084	7.5045	8.3506	6.47447	6.19761	8.66425	7.17148	6.76103	8.21314	7.69425	7.1134	6.15888	6.54805	6.00399	7.54517	5.8917	5.08045	4.4725	6.00592
Peak_845	Chr1	4802638	4803650	4.89729	5.72486	6.11269	6.40315	5.98936	7.09766	6.53783	9.31102	7.28265	7.59258	8.15403	8.77228	7.70455	7.61367	6.45507	6.53459	7.38163	8.55647	6.79259	7.60394	8.89073	8.04532	7.0928	7.86195	4.8908	6.95162	5.6275
Peak_846	Chr1	4806524	4807609	6.36174	8.79563	10.45	11.0888	7.70582	9.28907	11.4399	11.6564	10.4424	11.4702	9.92327	11.2658	13.5741	12.8218	12.4601	10.1836	10.9616	9.58877	7.76183	12.5131	11.4248	7.35921	10.4213	7.82238	7.87383	6.71592	7.33347
Peak_847	Chr1	4817122	4818109	3.39406	2.61209	2.71525	3.47392	3.97471	3.26096	3.6586	3.47891	3.05465	4.40562	5.22585	5.14931	3.5438	2.88495	4.07287	4.66683	3.7501	4.51376	4.85982	3.98802	3.9797	4.97462	4.94135	5.54363	3.87488	4.29581	3.87155
Peak_848	Chr1	4819821	4820608	4.57257	2.65968	3.57962	3.89253	2.65968	3.82994	4.42238	5.22341	4.98143	3.24377	5.42158	5.03358	4.12199	5.24635	4.59551	3.45655	3.8216	4.01143	4.15953	5.06278	4.22629	5.36735	6.52509	5.45079	2.77859	2.87246	3.12487
Peak_849	Chr1	4826780	4827553	3.89922	3.35766	2.986	4.11584	4.10097	3.89072	5.5239	4.4875	4.54909	5.39859	4.31123	5.48142	5.25205	6.60701	5.15648	4.6574	5.19259	6.90221	4.41954	3.35766	3.81639	4.85066	5.42196	3.99479	4.44078	4.30486	4.22415
Peak_850	Chr1	4836793	4837631	3.61085	2.89769	1.79857	2.74683	2.74095	3.64219	3.63044	3.79698	2.67434	2.70765	3.90865	2.42748	3.16611	3.68726	3.19745	3.0172	3.31501	4.46115	3.56383	4.41217	1.89065	2.68218	2.48821	2.46666	2.78014	2.68806	2.33343
Peak_851	Chr1	4838792	4840665	6.17342	7.22513	7.45056	8.27859	7.67423	7.7751	7.58827	7.38214	8.15491	7.67072	8.86628	8.50226	7.37424	8.94961	6.98741	8.36543	8.71454	7.04707	8.1742	6.6655	7.5602	7.13478	7.12689	8.40315	6.22166	6.76287	5.96641
Peak_852	Chr1	4847108	4847709	2.95445	4.63647	5.43106	3.97568	5.51297	4.71838	5.15254	4.73477	4.0767	3.85007	2.51483	4.03848	3.59613	4.18592	3.17835	2.32096	2.89165	3.01452	3.0391	3.88556	3.50602	4.11493	4.06032	4.47537	4.65831	3.82276	3.87737
Peak_853	Chr1	4854201	4855329	6.31163	7.41525	6.75715	9.43177	9.20609	8.98187	7.99327	7.84476	7.10076	8.1971	5.20363	6.88236	6.31163	5.57345	6.92604	6.83577	6.16166	6.66397	4.22522	6.94497	6.14855	4.95321	4.5499	5.18179	6.12817	5.42057	5.49482
Peak_854	Chr1	4855413	4856131	2.62	2.05988	2.29307	2.37538	2.1056	2.41881	3.25328	4.50613	2.90806	3.58707	1.25742	3.38131	3.16869	3.914	3.914	2.53084	3.98716	2.80519	2.49883	2.45082	4.89478	2.79833	2.50341	3.31273	3.26471	1.65065	3.03152
Peak_855	Chr1	4861173	4862136	5.35425	5.39006	4.90408	6.00051	6.5581	6.85821	9.06642	8.22406	7.67499	7.50959	7.65112	7.36294	7.94782	8.59408	9.31878	7.20096	7.39193	8.29227	6.49842	9.52169	9.36311	8.86521	7.43115	8.15244	6.77807	7.86086	7.69375
Peak_856	Chr1	4868931	4869323	0.472642	0.434998	1.71489	2.08297	1.30917	1.05403	3.21647	3.65147	2.22518	3.94844	0.426632	1.31754	1.06658	1.55595	1.02057	1.21716	1.66052	1.16278	1.13769	2.38412	3.63892	0.552112	0.112932	0.00418267	1.30917	0	0.970379
Peak_857	Chr1	4876428	4877352	6.55916	8.8658	9.62994	8.00392	11.798	10.4616	10.3248	11.3519	10.0618	10.6944	11.0427	10.4652	11.0427	9.7952	11.622	9.32428	9.43801	8.44819	7.09939	9.77743	8.36288	10.7015	12.1356	10.5984	7.15981	9.3154	6.97855
Peak_858	Chr1	4877585	4879231	8.55928	10.0963	9.96154	9.89268	9.18006	8.40158	8.44949	7.8327	8.44949	6.82067	4.54013	4.83555	4.07205	3.82552	4.02214	5.63699	5.09105	5.63898	4.12294	6.82067	8.61816	6.12104	6.73784	6.57615	8.90759	8.61018	8.58223
Peak_859	Chr1	4881195	4882078	4.93137	6.36689	6.47474	5.76814	6.98796	7.48258	9.11894	8.34911	9.04455	8.20778	8.81583	7.19622	6.45615	8.19105	8.75261	5.87785	6.62164	5.98942	5.32929	5.97082	7.77638	7.3673	7.02143	8.25428	5.17682	6.11028	4.93136
Peak_860	Chr1	4884249	4885618	3.35357	2.91563	1.98694	3.69433	4.53181	4.40583	5.25772	3.8863	4.40103	3.61153	3.69672	4.26665	3.30438	3.73032	3.48075	2.99602	2.05534	3.32717	3.23358	3.0896	3.18199	2.71285	2.90003	2.89523	2.74045	2.81484	2.81484
Peak_861	Chr1	4888094	4888902	5.97778	6.29679	7.85117	6.56093	7.67846	7.56061	5.38651	6.30695	5.89244	5.14877	8.72691	6.15658	5.0675	5.86603	6.03467	4.37666	7.51795	5.34384	5.80304	4.84602	4.94152	5.59579	8.38962	6.14846	4.8318	6.27647	5.26459
Peak_862	Chr1	4890863	4892302	5.70532	6.22928	6.18361	7.03405	9.19151	8.60021	7.37422	7.51349	7.4975	7.44271	9.26685	7.72466	5.74185	8.18355	8.53172	5.35601	6.86967	6.28749	7.70982	7.16075	7.36737	8.95408	9.35133	9.56822	6.36625	6.5352	6.30804
Peak_863	Chr1	4897264	4897989	3.11776	3.23324	3.00229	6.81289	3.7223	4.6257	6.45063	4.94042	5.89816	2.78493	4.88155	4.13211	5.41137	3.8989	4.88834	3.68154	5.10571	4.50344	3.14946	2.30945	3.46418	4.26344	5.83024	3.98268	2.5404	2.65587	2.77134
Peak_864	Chr1	4898940	4900247	10.0387	12.8877	16.0244	11.7591	15.2842	13.4406	15.2515	12.9241	15.058	12.4654	11.2514	11.4361	12.4076	12.6727	10.5313	13.3438	13.1855	13.893	9.97332	11.8597	12.0808	13.1754	11.9853	12.8763	8.71032	10.4471	9.87027
Peak_865	Chr1	4908074	4909008	1.25526	1.72114	2.22922	3.06255	3.7728	3.3034	1.94266	1.69301	2.7373	1.73872	2.52985	2.31713	2.29427	1.79322	2.0833	1.67192	1.21482	1.58226	2.23625	1.88288	1.16559	2.92366	2.8674	3.1065	1.34492	1.25526	1.25526
Peak_866	Chr1	4912349	4913265	4.41869	4.53342	4.64097	5.17157	5.44045	4.7539	7.23482	7.13085	4.71088	6.03021	7.49833	7.37105	7.77976	8.13648	8.15082	7.19897	6.58412	6.98207	6.27938	6.28655	5.20204	5.3813	6.31882	5.30422	4.02253	3.0169	3.0169
Peak_867	Chr1	4915591	4916616	3.6769	3.62082	2.87423	2.8502	4.13991	4.57729	3.4558	4.66381	3.38691	3.95406	4.12549	4.89451	3.51348	4.73911	4.24885	4.52763	5.08998	4.85126	5.15246	4.055	3.57276	4.34659	4.48758	4.93617	3.80667	3.6785	4.57569
Peak_868	Chr1	4920858	4921626	3.37949	2.61638	2.55012	2.15894	6.44262	5.73723	4.48034	5.41018	5.02542	2.62707	4.31361	4.23024	4.19604	3.92457	4.46965	2.43896	2.70402	3.31109	4.25589	3.42652	2.39835	3.16146	4.68982	3.75143	2.41545	2.23376	3.30895
Peak_869	Chr1	4927925	4928820	5.64135	5.69822	6.15137	7.32183	8.44643	6.97876	7.99329	7.20442	8.13455	6.27428	6.25593	6.59166	6.83016	8.19509	5.56796	6.08349	6.12385	6.54397	5.87434	5.78811	6.52562	9.12706	8.47762	7.92358	5.92387	5.85233	7.95292
Peak_870	Chr1	4930214	4931025	5.85043	5.69253	5.27956	8.02865	8.69467	8.33433	7.71285	7.33025	8.56308	7.56912	8.5732	8.2655	6.74723	6.31806	7.13185	8.32016	6.73913	6.21482	7.31607	7.07112	6.44964	6.62577	8.16429	7.46183	6.19457	6.1885	7.74321
Peak_871	Chr1	4934513	4935917	4.71375	4.89276	4.05741	6.77405	4.40722	4.40722	3.72514	4.48327	3.85266	6.02644	3.60931	5.039	4.11474	4.95242	4.71141	5.17121	5.9153	5.59122	5.11856	5.48475	6.4991	3.58007	3.39638	3.5204	5.13494	3.25833	4.33703
Peak_872	Chr1	4946949	4947711	5.93315	5.2179	6.24123	7.20208	7.0168	8.13707	7.13314	9.66238	7.33995	5.89437	8.31373	5.57983	8.05952	7.96903	8.39991	8.24049	8.01428	6.63979	7.84623	7.47568	7.08789	8.23833	11.1252	10.8602	6.38987	5.71341	5.83189
Peak_873	Chr1	4951931	4953035	5.46244	3.94509	4.03584	6.90689	4.67996	4.77219	7.19399	7.16573	7.05713	5.92507	5.01467	6.13631	6.29698	5.1664	5.7659	6.60937	5.8388	6.0664	5.53533	7.133	4.93136	6.06937	6.21665	6.06937	3.88856	3.96741	3.88112
Peak_874	Chr1	4954026	4954720	3.45314	2.48815	2.04587	2.60641	3.74169	3.37745	3.01558	3.72986	2.53309	3.62106	4.44651	4.05152	4.04443	5.30506	4.1887	4.19817	4.77527	4.04916	2.99903	4.4536	3.85994	3.15986	4.65701	4.18398	2.85002	2.48106	2.50707
Peak_875	Chr1	4958641	4959369	2.04741	1.98878	2.64494	2.30221	2.27289	2.14211	2.64494	2.62014	2.52994	3.84452	1.62124	3.67767	2.1827	2.64494	2.41495	3.87159	3.81521	3.01925	4.18275	2.8321	2.56151	1.37997	1.02596	1.3687	3.33493	0.922236	2.06995
Peak_876	Chr1	4963466	4964472	7.47785	7.29013	6.48211	7.37991	9.5787	8.69885	6.82654	7.59375	6.57678	6.24378	9.9019	7.75208	5.74265	7.85329	7.44193	5.15663	7.09751	4.60326	8.67763	6.98651	6.2095	8.28097	8.98616	8.39361	6.41028	6.99631	6.76614
Peak_877	Chr1	4969275	4970175	1.16215	1.48871	1.56716	1.41939	1.31175	1.32269	3.21095	2.89533	2.54687	2.22212	3.50286	3.78564	3.90058	4.1268	4.74527	3.56489	3.60867	3.16352	3.65246	2.97743	2.74573	1.90103	1.84265	2.13638	2.20206	1.95394	2.29145
Peak_878	Chr1	4973118	4973770	2.62805	1.87034	1.54058	4.00752	4.3977	4.5865	4.09311	3.61734	4.33225	3.84641	4.05283	2.77657	3.00061	3.58713	5.10254	2.68091	3.56448	2.2429	4.02262	2.82439	3.08116	2.05411	3.46882	2.87726	2.73377	2.14976	2.80174
Peak_879	Chr1	4980512	4981430	5.67367	5.83822	5.747	5.01186	7.33534	7.23696	6.71109	5.83822	7.66266	6.66458	7.04199	6.58767	7.2477	5.14243	7.17972	5.25512	6.34621	5.68261	7.19403	7.15289	6.38555	5.6361	7.80755	7.42656	4.93494	5.01722	5.12275
Peak_880	Chr1	4983417	4984383	6.67545	7.01543	6.66865	6.18928	6.86243	6.94063	8.99919	9.84913	8.40933	8.18664	8.8428	9.37146	7.18371	8.70511	8.02515	8.52322	8.23084	6.98823	6.92873	7.50839	7.13951	8.36683	9.75224	9.14538	6.44426	5.9836	7.12591
Peak_881	Chr1	4990058	4990868	1.68635	1.2749	1.50799	2.37751	0.642516	1.46137	2.07551	3.54904	1.71675	2.51939	1.5161	2.01065	1.13707	2.08362	1.56271	2.37549	1.65595	1.54853	2.40386	1.93971	1.52218	2.48088	1.13707	1.40462	3.0707	1.34381	2.59641
Peak_882	Chr1	5000040	5000767	5.92035	5.75778	5.29716	6.10324	7.00416	5.57714	5.01943	5.91583	5.92035	5.97905	7.33156	5.52746	5.87293	6.57967	5.91809	7.13964	7.26835	6.56161	5.46198	6.19807	6.10324	6.01293	9.37276	6.97707	4.95168	6.32001	5.06684
Peak_883	Chr1	5002963	5003520	2.41855	2.58646	1.91775	3.85613	3.64402	3.95039	4.38638	3.94156	5.30549	3.22866	2.65422	1.97372	1.7086	1.59076	1.54657	3.85907	2.13575	2.98121	3.72062	2.67189	1.74689	5.55294	3.15207	4.48654	2.86632	3.58806	2.63949
Peak_884	Chr1	5013878	5014581	4.40134	4.16785	4.37332	5.69022	5.88168	5.05044	5.11116	4.08379	3.93202	3.91334	5.11115	4.82863	5.86767	5.47073	4.53676	4.65118	3.46737	5.13684	3.31793	4.24023	4.40601	4.99441	4.24256	5.35165	3.8106	3.72888	2.74354
Peak_885	Chr1	5015989	5016687	4.24234	3.14413	2.84782	4.48456	5.30057	4.4046	5.20416	5.90259	4.59743	3.71557	3.88489	4.37168	5.97549	4.79732	5.60628	4.38579	4.29878	3.86843	3.43573	4.27996	3.41692	4.96194	4.51513	5.23708	4.43752	5.27706	3.6168
Peak_886	Chr1	5023346	5024103	1.32718	1.92787	1.88016	2.01028	2.0775	1.65029	3.82539	4.06176	3.38082	3.49142	3.62804	2.57411	3.92948	2.88856	3.10975	2.88639	2.98614	3.30059	2.7541	4.09212	2.87554	2.58712	2.54375	1.43777	3.0165	1.45078	1.82812
Peak_887	Chr1	5027562	5028426	6.00316	6.2787	8.11253	6.59416	8.12582	7.53102	8.67502	7.46261	7.989	7.20606	7.86928	8.07831	6.09437	8.03651	7.71155	6.49344	5.88533	6.78419	7.17756	7.07494	7.33528	7.85408	9.42376	9.30404	4.74893	7.16046	4.94277
Peak_888	Chr1	5035843	5036562	2.56157	3.50675	3.59807	4.45421	4.47247	4.02956	4.19166	3.9314	5.58888	3.91541	4.30809	3.83094	3.94053	4.66196	4.17568	3.50218	4.31951	4.46106	3.83094	3.75788	3.30812	4.91767	5.93819	6.13225	3.54784	4.07523	3.96107
Peak_889	Chr1	5037487	5038385	6.10158	6.37585	5.91874	6.7708	7.82582	8.12569	9.43487	8.92473	8.96678	5.9681	10.1791	9.39647	7.56618	8.34876	7.07432	8.2994	8.26283	7.9593	8.8845	7.41624	8.40544	8.30305	8.22626	8.47859	7.18037	5.72126	6.23323
Peak_890	Chr1	5040790	5041348	1.64967	2.09958	2.69358	3.32286	3.53458	3.19054	4.62849	4.16093	5.24895	1.76141	3.99332	3.42872	3.48166	2.69946	3.07879	3.59928	4.29326	3.58458	2.47597	2.24367	3.11114	2.39952	2.69652	3.12585	3.65515	2.87001	3.09644
Peak_891	Chr1	5042407	5043614	4.23194	4.20064	3.45767	6.96841	6.45404	5.90294	6.09481	6.73164	5.69747	5.59541	7.60524	5.78319	7.49502	6.10705	5.74237	5.22393	6.38465	6.31661	5.57228	5.05927	5.27427	6.41731	7.63382	5.75326	4.44421	4.68371	3.86181
Peak_892	Chr1	5047937	5048587	3.54008	2.09324	1.54784	3.03508	3.43908	3.5628	3.36333	2.69925	2.49724	4.39858	2.47199	2.8356	2.99973	3.69158	3.5123	5.27477	4.37839	5.47677	2.876	3.94661	3.13607	4.50716	3.03003	4.05013	4.63594	1.80287	3.25223
Peak_893	Chr1	5054310	5055351	7.96969	6.91748	6.13345	8.03753	7.39231	7.96496	9.1418	10.2319	9.04714	8.60228	8.14637	8.69062	6.99951	7.47119	6.62563	9.72707	8.13691	7.88451	7.24087	7.7867	8.53445	9.10079	10.0079	8.85627	6.67769	5.74537	6.59724
Peak_894	Chr1	5058647	5059673	3.14993	2.98667	3.67332	3.78536	3.67651	2.89383	5.07222	5.80528	6.58475	4.13428	2.93865	3.99983	4.7457	4.07986	4.73449	3.6189	2.59933	3.32279	2.67616	3.28597	2.82501	3.43003	4.12468	5.24348	2.89704	3.87979	3.10511
Peak_895	Chr1	5063850	5065196	4.83496	5.15835	7.03278	5.80024	5.52811	6.88145	7.64783	7.06329	6.47508	6.59712	7.06084	7.64416	8.59725	8.83765	9.29649	6.35061	7.3403	7.57827	7.17677	6.9083	6.58613	5.55618	7.95169	6.47509	5.02045	5.16567	5.85027
Peak_896	Chr1	5067410	5068628	7.43683	7.46245	7.42739	7.52313	8.17174	8.96464	8.13399	8.15287	7.67011	8.09488	10.2282	9.20332	9.08466	8.73136	8.2095	8.88374	7.91014	8.63697	7.87103	7.53931	7.56493	10.1082	9.41234	10.0394	6.87721	8.91071	6.51177
Peak_897	Chr1	5076436	5077899	11.8389	11.2651	12.8494	12.7674	14.1721	12.9751	11.886	12.937	12.2161	11.5424	15.2769	13.3603	14.144	14.7076	13.1997	11.703	10.3747	11.0956	13.8554	11.3156	10.4073	11.2595	13.1391	12.5631	10.8227	11.1832	11.4695
Peak_898	Chr1	5081668	5082523	1.56698	1.11186	1.17715	2.87279	1.77437	1.48248	2.18916	2.70572	1.8243	3.02641	1.31925	2.35046	3.72157	2.42536	2.93808	3.61979	4.19589	3.65244	3.59291	2.96496	3.06674	0.783488	0.881424	0.881424	3.03601	1.0773	1.95872
Peak_899	Chr1	5088265	5088907	2.3647	2.82998	2.43628	3.25946	3.38983	4.5888	4.65527	3.66082	3.90623	3.65059	4.53	4.26158	3.49209	3.37194	3.26457	3.66337	2.5232	3.11885	3.36683	3.17509	2.59223	2.47719	2.92712	2.86832	2.60756	2.08605	2.34681
Peak_900	Chr1	5097247	5098089	2.35356	1.69059	1.65939	2.7845	2.30286	1.59114	1.52094	2.5856	1.91873	3.18228	2.98339	3.39872	3.62102	4.87287	3.58006	3.17838	3.58202	3.48062	3.38117	4.05975	3.95445	2.49006	3.67951	2.6324	2.02207	2.48616	2.03962
Peak_901	Chr1	5103822	5104810	6.16296	6.6782	7.69539	8.51646	8.66271	8.16243	7.39954	9.91758	8.33362	7.41616	9.07158	7.48929	7.20674	10.3264	8.25218	6.92585	6.53859	7.06713	8.37684	7.45937	7.8832	8.22227	9.37408	8.40011	7.58569	8.61119	8.7508
Peak_902	Chr1	5106145	5106920	4.98009	2.86604	2.0505	3.47611	4.18361	3.14777	2.0738	2.95289	1.89375	3.11388	4.6454	5.60921	3.84257	3.37866	3.57354	3.56507	4.42933	2.91264	4.71742	3.21344	2.69446	3.73242	3.91671	3.69217	3.6731	5.28088	3.78114
Peak_903	Chr1	5110817	5111810	6.32545	7.00016	7.73441	8.08334	9.16155	8.54803	8.81263	8.32644	8.74813	7.56903	11.4883	8.93334	8.60757	8.69025	7.34743	8.17595	6.86125	7.96593	8.41573	7.09111	6.08896	9.10864	9.86769	7.99239	5.31337	7.91632	6.40978
Peak_904	Chr1	5114668	5115555	6.70288	7.55254	9.7165	8.89275	8.5688	7.19898	9.09452	9.28519	8.96864	7.95053	6.69177	7.36558	8.78353	7.29338	8.17821	9.11673	7.37484	9.62949	5.82175	6.32525	6.40115	8.27263	5.66626	7.37669	4.93507	6.94168	5.09611
Peak_905	Chr1	5122700	5123630	4.82013	5.47341	5.20327	5.53344	5.37277	6.10726	7.47209	4.5341	5.5352	4.50585	5.3763	4.57118	5.0426	5.89362	5.28096	4.19687	5.35335	5.06555	6.14081	4.88016	4.88016	5.61643	5.45046	6.45686	3.54712	5.62172	4.35754
Peak_906	Chr1	5138581	5139433	2.58613	1.89431	2.69211	3.25289	1.81915	2.31633	3.41284	3.29529	2.55529	3.70382	2.25467	1.90972	2.81737	3.05825	2.97154	3.43018	4.92751	3.73466	3.18351	2.77112	4.29543	3.58435	2.56685	2.9542	4.4072	3.5381	3.08716
Peak_907	Chr1	5142865	5143798	5.03168	7.16474	6.80571	6.11405	6.91306	7.02042	7.6892	8.20663	8.67124	7.25449	10.7409	8.75396	7.96727	9.57586	8.58325	6.05597	9.58994	8.86484	6.26892	5.83773	8.42837	8.79621	9.93137	8.70645	6.55227	6.283	5.32559
Peak_908	Chr1	5149146	5151160	10.7927	11.0627	12.5646	11.6322	12.0237	12.9937	11.6697	12.0547	12.6298	12.7367	14.6285	13.2719	13.9449	15.109	15.5503	13.6047	15.2346	13.143	11.3809	10.9338	11.2463	14.0224	15.5609	12.9945	10.229	11.4307	10.2763
Peak_909	Chr1	5164358	5165140	3.96987	3.75573	3.59408	3.43663	3.99296	4.01395	2.78373	5.4604	4.24908	6.01882	5.72911	5.87607	5.52128	7.19866	6.71581	5.71232	6.23086	5.89707	5.42681	5.97894	7.41489	6.09231	3.91528	4.42542	4.94606	4.1756	2.67667
Peak_910	Chr1	5166067	5166815	7.03384	6.86924	5.96504	7.92267	8.24308	7.23135	8.00387	7.97095	7.38936	8.26283	7.10845	6.27448	6.24157	6.85826	7.3762	6.87802	7.83049	7.09968	7.48593	7.42667	5.59634	8.34623	7.44424	6.96141	5.04329	5.18595	6.15597
Peak_911	Chr1	5167521	5168317	5.56248	4.44669	3.47114	3.85269	5.36036	5.88216	5.05924	5.45111	5.05717	4.70655	3.28964	5.29848	5.23043	4.18062	2.91633	4.68387	5.1603	5.8801	4.57662	3.93313	4.61993	5.12524	5.15824	4.73337	4.3415	3.99707	5.0943
Peak_912	Chr1	5168574	5170542	3.60315	3.86612	3.95962	3.95545	4.05312	3.25418	4.14746	4.41293	4.49975	4.45885	3.84024	4.05228	3.51298	3.85944	3.04297	4.07065	4.25014	4.10071	3.48042	3.27839	3.75091	2.90021	3.57643	3.03462	3.53385	3.87447	3.06551
Peak_913	Chr1	5171394	5171661	2.68036	2.93183	1.11017	3.00544	2.42888	1.57019	2.28781	2.07927	3.44705	1.32484	0	1.77259	1.25124	1.25124	0.625621	0.368012	1.56405	0.938432	0.828027	0.748291	1.16537	0.0613354	0	0.0613354	1.75419	1.45978	0.625621
Peak_914	Chr1	5175450	5176332	5.74488	6.32198	4.81409	5.96641	7.65301	6.2531	6.5342	6.9754	7.54132	5.94966	7.14852	7.14852	7.08896	7.18017	6.36107	5.72441	6.17305	6.00551	5.12683	5.79142	6.11534	7.92481	6.35176	7.22299	5.67042	5.79142	6.36107
Peak_915	Chr1	5177440	5178621	8.22729	8.32046	10.0129	9.64022	8.37052	10.5622	8.82528	10.1979	9.33427	7.13699	9.39268	7.33168	7.37619	7.07719	7.6279	8.12021	7.14812	7.00488	8.12159	6.15099	6.28867	9.554	8.92263	7.89909	6.15516	8.37331	7.73081
Peak_916	Chr1	5186196	5187070	6.86634	10.8697	10.4263	10.7739	9.29351	10.1558	8.90652	10.7137	7.44495	8.79379	9.30478	9.99423	8.07241	9.47573	8.74871	7.16128	9.00608	7.13123	8.20015	7.6779	7.70983	8.80695	10.5296	7.75681	6.29524	6.38166	7.08989
Peak_917	Chr1	5187608	5188274	2.60739	1.90995	1.6635	2.13668	5.24928	4.52226	3.12492	3.51924	4.02198	3.10521	1.57478	2.42502	2.12682	1.85819	2.77743	2.18104	3.87905	2.55071	3.56359	2.81194	3.21118	4.26843	5.87525	5.73724	2.99184	3.23829	3.40094
Peak_918	Chr1	5193269	5194406	7.44038	9.65762	9.5984	8.68695	9.81506	9.80206	7.62527	6.43215	7.1096	8.46161	9.56228	9.46839	8.77939	8.0716	6.93626	9.79773	10.2397	9.35862	8.10338	7.29304	7.94449	9.2084	8.14961	8.42406	9.20839	9.57384	8.69272
Peak_919	Chr1	5199156	5200117	3.40548	4.28889	3.98986	4.17099	4.74511	3.69083	4.33331	4.86302	4.18465	5.00484	5.69516	5.14154	4.50931	5.2321	4.86131	6.41795	5.82845	5.11762	5.77376	4.50589	3.59514	4.11118	4.77929	4.16928	4.87498	3.99157	4.52469
Peak_920	Chr1	5202790	5203513	5.1902	5.0744	5.24469	5.52395	7.75577	7.16092	4.72022	5.51941	4.94045	4.91547	6.43893	5.58752	6.83171	4.75654	6.32086	5.19928	4.02093	5.3128	4.38873	5.04261	4.98131	5.33096	6.10972	5.44221	4.51588	4.64983	5.81002
Peak_921	Chr1	5208907	5210057	6.67513	6.87792	7.36206	6.63657	8.19038	8.01329	9.12724	9.83417	10.5968	7.94474	10.4768	9.93985	10.0313	11.288	9.84416	7.8819	9.72706	8.42888	8.78305	10.7982	10.2869	9.91415	9.45	10.3854	7.38062	8.86304	8.59454
Peak_922	Chr1	5211116	5212365	10.1547	9.45639	10.1192	9.02769	9.91664	10.4374	10.3703	11.6038	10.7938	13.2726	14.1116	13.049	13.0201	14.9111	14.8072	12.8926	12.694	12.3284	11.2961	12.4454	10.4729	12.072	12.9097	11.763	10.2125	11.6025	10.5676
Peak_923	Chr1	5219358	5220280	6.29021	6.76928	7.96249	6.26706	6.34719	5.10055	7.53863	7.12724	8.2688	4.66066	7.86454	6.24746	6.26706	5.92512	5.99279	7.82714	5.86279	6.77818	4.21365	6.34185	6.24568	6.17445	7.11121	6.50036	5.44961	4.69094	5.11302
Peak_924	Chr1	5220525	5221324	3.47867	2.72458	2.72458	3.48278	3.5136	2.72458	4.71562	3.56291	5.34437	3.10881	3.14374	5.74915	4.53275	3.38826	4.71562	3.24648	5.3382	4.39508	3.54853	2.72458	2.8869	4.57179	4.04167	3.85674	3.20539	3.6677	3.28963
Peak_925	Chr1	5223604	5225312	3.82621	5.78837	6.60978	7.30327	5.89898	6.00189	7.36194	5.80953	6.38663	6.06345	4.86403	4.95445	6.3347	5.00158	6.37605	4.85057	5.29783	5.46711	4.48026	5.05256	5.28628	4.16959	4.94291	4.16959	3.40684	4.10514	4.21864
Peak_926	Chr1	5227264	5228002	1.3613	0.907532	0.680649	1.88179	1.72609	1.64379	2.94948	1.9285	2.60915	4.31077	1.45694	2.04194	3.58119	2.84048	2.88497	3.42104	3.35208	2.96727	3.24754	3.83254	3.25866	2.20877	0.79409	2.16873	2.49571	0.858596	2.15539
Peak_927	Chr1	5230291	5231181	5.5328	4.98671	5.66378	6.27997	5.98479	7.13046	7.26699	7.71529	7.30572	8.20971	6.88694	6.72828	8.33517	7.86657	8.39789	6.32425	6.11578	7.27068	5.45715	7.05482	6.03276	8.87388	8.17651	7.84812	5.33355	7.24485	6.16559
Peak_928	Chr1	5237936	5238679	1.95531	3.38258	4.01668	3.7162	4.30831	4.18459	5.63395	4.17575	4.74356	3.50631	4.31494	4.50495	3.46654	4.61984	3.26769	4.19564	4.06528	3.46212	4.50274	2.85674	3.70957	3.94156	3.32735	3.1528	2.83686	3.93272	2.86779
Peak_929	Chr1	5240746	5241601	6.4945	5.40376	5.73598	3.40664	6.26406	6.16612	5.32311	7.04755	7.07827	7.0149	8.04035	6.56171	6.36392	7.29719	5.58811	6.7403	6.94962	5.5305	6.4945	7.02258	6.54059	6.92849	7.81376	6.62508	5.88768	8.02115	5.65916
Peak_930	Chr1	5242394	5244413	7.18222	6.64595	6.87136	7.32463	7.9268	8.82844	8.7487	8.04561	8.4826	9.10186	10.6496	9.77403	7.57201	9.54618	8.55665	8.13431	8.62338	8.13431	8.04154	8.04073	7.38728	9.50061	8.84798	9.75532	5.92577	7.30184	6.44821
Peak_931	Chr1	5248903	5249577	2.71043	4.37613	4.84126	4.51494	3.83794	4.85587	3.56276	4.5953	2.48395	3.64556	4.06685	2.98804	5.10427	5.07991	3.99867	5.22603	5.43059	5.28935	3.85012	2.51317	2.78592	5.09209	3.10493	3.47753	3.28758	2.73234	2.35975
Peak_932	Chr1	5249647	5250817	3.53043	3.37461	2.84119	4.0091	4.02595	4.0091	3.44059	3.43497	2.91839	4.43865	5.09279	4.39794	4.70817	4.42742	4.51024	4.70817	5.91259	5.36653	5.22615	4.77555	4.93979	4.58183	5.017	4.68852	4.80783	3.90803	4.69413
Peak_933	Chr1	5251368	5253134	4.92672	5.0216	5.58163	6.51841	6.96028	6.67097	6.58818	6.39933	6.04583	5.48208	7.70543	6.66074	5.82257	6.20676	6.62166	6.83563	6.5519	6.27747	6.32584	6.2877	5.57232	6.55097	7.65055	7.17146	5.01602	4.88671	5.15835
Peak_934	Chr1	5262779	5265100	4.48467	6.41092	7.17052	7.20308	6.37198	6.57232	7.17689	6.82364	7.32201	4.10805	4.18805	4.3537	4.04647	3.90913	3.97426	4.61493	3.28545	4.15124	3.45818	4.32468	4.40113	3.50208	5.37382	4.54838	3.30032	4.33247	3.32156
Peak_935	Chr1	5267800	5268490	2.30511	2.34555	2.10291	2.89507	2.18379	1.54863	3.44458	3.4089	3.16625	4.58643	3.44934	2.55965	3.083	2.87128	2.84749	2.27656	3.61348	3.00925	3.13533	2.78088	2.19092	3.4541	3.48502	2.59771	1.70326	2.11004	2.06247
Peak_936	Chr1	5269228	5269641	1.46115	1.61997	1.62791	1.8582	1.07998	2.02099	1.52467	1.98525	0.809982	2.58083	0.802041	0.809982	1.2785	1.64379	0.607487	1.48497	1.01248	1.35394	1.12365	2.50142	2.04084	1.91775	1.38571	1.91775	1.59217	1.01248	1.40556
Peak_937	Chr1	5276766	5277712	4.18671	6.11864	7.5524	7.41875	9.49474	6.64979	9.64229	9.28298	9.23958	5.75586	7.7416	7.07159	8.04016	9.64923	9.45655	8.05578	6.8928	7.61663	6.34082	6.25924	7.05596	7.47603	8.50535	8.50188	6.3738	4.9574	6.46233
Peak_938	Chr1	5279144	5279983	2.92947	3.08797	2.75335	3.37759	4.49106	4.09186	4.99007	3.99206	5.28947	5.18967	5.21903	5.16032	4.49107	3.60459	5.08987	3.27192	3.99206	4.46758	4.59086	4.02924	4.17013	7.30312	7.28551	6.37555	3.34433	4.14665	5.07617
Peak_939	Chr1	5286913	5287640	3.88142	5.61327	5.95873	4.40075	8.24378	6.50515	5.46876	4.33978	5.17071	5.59746	6.62257	6.20485	6.33355	6.27484	5.89325	5.27232	4.77557	5.60198	5.00588	4.12302	5.45069	5.83906	6.32001	7.35189	4.36236	5.95873	3.21306
Peak_940	Chr1	5294564	5295275	3.14906	3.29681	4.09331	4.12332	5.8179	5.69092	4.82748	5.2315	5.43697	4.29647	4.43038	4.46501	5.4185	4.87365	3.36145	4.4881	5.10221	4.02636	6.34197	5.90101	4.77437	4.27108	5.13222	4.40268	5.67938	5.3123	5.30999
Peak_941	Chr1	5295798	5296998	8.38182	9.89832	10.7483	9.03468	11.0111	9.24956	7.07336	8.65555	7.70158	8.45298	9.24956	9.76829	8.79927	10.1912	10.6223	10.3582	11.1863	9.89832	9.22218	10.1146	9.03604	10.5389	11.5366	9.12091	7.18832	7.64957	7.32793
Peak_942	Chr1	5299008	5299719	2.6827	1.75691	2.11014	2.04088	3.4261	4.278	2.08937	2.43798	2.63191	2.44259	2.58573	2.00163	1.21437	1.45909	2.47261	0.909625	2.00164	1.57684	1.41292	2.58342	1.80309	2.8143	2.64345	3.88553	2.41489	3.65004	2.32947
Peak_943	Chr1	5302765	5303503	5.54973	5.12933	5.96124	4.71561	5.79218	4.67556	4.62218	4.80235	5.41627	2.90499	5.2183	4.69113	5.35399	5.54973	5.44519	5.19161	5.88783	4.898	7	4.94693	2.88052	5.62981	5.26502	4.56435	3.46997	5.44519	4.87131
Peak_944	Chr1	5304302	5305043	3.28093	2.89989	3.60437	5.56053	7.31729	5.81086	4.99561	7.69834	5.10859	4.66995	7.91101	6.02131	4.28448	3.76609	5.55831	3.54899	3.09484	4.13384	4.90699	4.6478	4.73641	4.73642	5.76212	4.9934	4.99782	3.70185	4.04301
Peak_945	Chr1	5308812	5309633	4.45543	3.56954	3.97749	6.84912	4.95536	4.30744	5.20533	6.01723	5.02735	3.8755	6.03722	5.76926	4.6834	4.6414	5.59928	5.28132	4.24545	5.71527	3.15559	4.17146	2.21971	5.55529	6.51916	6.96911	4.51942	6.01123	5.59728
Peak_946	Chr1	5315398	5316168	4.64354	4.67552	5.43666	5.07848	7.43649	5.6328	6.0187	7.30218	6.03575	5.61361	6.14022	5.01025	5.60509	6.41525	7.06765	6.32145	4.05724	4.93137	6.55596	5.65838	6.23829	5.38762	6.44297	5.7522	4.51349	4.22993	5.34284
Peak_947	Chr1	5318066	5318635	2.1946	1.61783	1.02953	2.05906	2.1946	2.02157	2.22921	2.05906	2.85212	2.43396	2.50606	2.64736	2.56662	3.4981	3.12896	2.54066	2.35898	3.31353	2.75407	2.5695	2.58392	2.21767	2.23498	2.43973	2.06771	1.61783	1.60053
Peak_948	Chr1	5322877	5323924	5.71405	4.48434	5.71405	6.59241	6.96728	6.42144	8.25345	7.34843	7.68879	6.50771	7.59468	6.96414	6.5532	8.32873	6.28184	7.1257	6.26773	7.32019	7.14922	7.05668	6.40262	8.48559	8.09503	7.94446	3.90713	6.02932	5.11331
Peak_949	Chr1	5326132	5327432	8.18357	9.10717	9.38893	10.2178	8.98461	10.0169	11.8401	11.3549	11.4257	10.684	11.3751	10.8167	10.094	12.2431	10.6966	9.66563	8.64221	9.90569	8.68264	9.72374	10.6537	10.8546	12.468	12.0511	6.78742	8.50575	6.86575
Peak_950	Chr1	5328953	5329653	6.04989	5.86699	3.7378	3.14454	4.42486	4.25134	5.50118	5.08848	5.02282	3.56662	4.41314	3.34854	2.84673	4.44128	4.53507	5.2151	4.54211	5.06972	3.17971	3.95353	3.98871	4.9384	7.47326	4.68984	4.18568	4.4061	3.23364
Peak_951	Chr1	5332197	5332965	3.92457	2.44965	1.57752	3.88823	4.12978	3.95236	3.70654	3.16146	3.96305	4.78387	4.12336	4.56156	4.96771	4.41621	4.444	3.89678	4.42476	3.69799	4.12123	3.96946	4.46965	3.99297	4.23024	3.59966	2.94343	2.61638	2.83441
Peak_952	Chr1	5340603	5342138	8.18684	7.88612	8.76473	8.77758	10.1699	10.4642	9.8317	11.2433	9.60588	9.40148	10.5808	10.0179	9.33621	11.2026	11.8436	9.73645	10.0425	9.61552	9.76962	10.4588	10.5658	12.81	13.0593	11.3685	7.61215	10.4931	9.72039
Peak_953	Chr1	5345600	5346001	1.54156	1.4148	2.3471	2.20399	3.33255	2.64969	1.39845	1.33711	1.0427	1.20626	0.41708	1.66832	1.2676	0.0736024	0.535662	0.834162	1.84824	1.23898	2.02407	1.15719	2.91956	2.15492	1.48023	1.7133	4.85367	1.45978	3.78644
Peak_954	Chr1	5362016	5362675	1.2702	2.48063	2.07715	3.28011	4.26887	3.87037	3.29754	4.1817	3.46441	2.5404	3.56403	3.30252	1.77828	2.48312	3.06591	3.19792	2.86916	3.50675	2.27889	2.65746	3.03105	1.66371	2.08213	2.22161	2.15934	1.9576	1.59398
Peak_955	Chr1	5381028	5381733	2.08151	2.475	3.04776	4.75907	3.95813	4.04893	3.53205	3.96977	4.47967	3.22471	4.86384	4.21424	4.3912	5.17816	4.98724	5.79051	3.75324	5.14324	3.87431	3.36674	5.22939	5.1642	4.15604	3.88595	2.6892	2.66592	2.69618
Peak_956	Chr1	5389937	5391209	5.92823	6.16582	4.69119	5.54214	5.84687	4.10237	3.95129	2.96218	2.70005	5.20253	5.4285	6.18777	4.28057	4.615	5.38073	5.20253	5.34716	4.48071	8.18795	5.71646	4.66924	7.20917	5.40914	5.77198	8.02783	5.26839	7.09553
Peak_957	Chr1	5398817	5401771	9.65469	11.0059	13.1275	13.1765	13.5514	12.46	11.0075	11.5377	10.9519	14.6105	14.635	14.9081	12.7737	13.721	14.3763	16.7249	18.1935	16.3088	12.9183	11.6951	12.1835	13.79	13.4585	12.3971	11.0837	11.5466	11.1188
Peak_958	Chr1	5403206	5403909	3.97405	5.21156	4.19586	4.6325	4.64417	5.88168	3.78959	5.49408	5.35398	4.77492	3.75456	2.38162	4.51808	5.88401	5.19288	4.08379	5.44272	6.26461	4.78193	5.65753	5.0271	4.41768	6.26695	4.78427	4.1515	5.11116	4.90101
Peak_959	Chr1	5404271	5405382	7.75774	9.28475	8.75702	11.0498	9.21231	7.97208	10.2826	11.1325	10.3801	9.301	9.18274	9.51978	9.73708	10.0357	7.90703	11.6351	9.54344	9.675	8.51902	9.44882	10.6831	10.7053	10.7024	9.79474	6.61654	8.09034	6.94471
Peak_960	Chr1	5405908	5406737	4.08967	4.64618	4.24216	4.34713	4.0758	3.70545	5.43837	4.04016	5.13733	3.85795	4.84818	4.23424	4.70757	4.05006	6.28996	4.61251	6.0127	5.11555	4.03421	3.86191	3.68763	3.53514	4.04016	3.73516	3.64604	3.49949	3.86191
Peak_961	Chr1	5409208	5410127	7.61503	10.2201	11.5494	9.08908	8.59951	9.49466	10.5703	12.3356	10.4577	9.50359	9.48215	9.64653	12.2444	12.3624	9.95742	8.10995	10.0986	9.20343	8.26361	7.37918	10.3898	8.45301	7.95451	8.47445	9.02118	8.76568	8.66919
Peak_962	Chr1	5410799	5411783	4.64767	5.78747	6.85552	6.57682	7.65822	7.13921	8.00367	9.55567	8.73961	4.82289	5.91597	4.83624	5.83086	7.40956	7.04409	6.5835	7.49801	6.07952	5.61224	6.03278	6.16629	6.61354	7.84179	7.33447	5.33689	5.1917	4.68938
Peak_963	Chr1	5419920	5421076	5.94151	4.98962	5.86905	7.6194	10.2463	9.29443	6.30237	6.37625	6.19866	4.60175	6.73427	6.18445	5.74829	5.73124	5.50534	6.46576	5.35759	6.44871	6.33079	4.0363	4.4199	8.21468	7.80977	9.2575	4.85322	5.79659	5.5508
Peak_964	Chr1	5425795	5426239	2.03165	1.41846	2.26067	2.63006	2.91819	2.38996	1.6955	2.57465	1.83218	2.83323	1.94299	1.6955	0.513453	0.941946	0.997354	1.2744	2.61529	2.41951	1.3926	3.09549	2.59312	0.96411	0.893926	1.13034	1.88389	2.52663	3.76409
Peak_965	Chr1	5435837	5436666	4.22236	4.4105	5.56512	5.6681	6.93362	5.03039	7.66441	7.91791	8.01891	4.94919	6.16916	6.33155	4.94919	6.49197	5.13733	4.67391	4.29366	4.09165	3.85399	5.08386	4.77491	6.38305	4.76897	6.4088	3.44799	5.62849	4.15502
Peak_966	Chr1	5442693	5443746	5.48813	3.81471	3.49968	4.51964	5.79693	4.45258	5.34933	4.61321	4.62101	6.30379	5.72674	7.03211	8.08794	8.16123	6.70616	6.51745	6.87615	7.56704	7.60291	6.81688	7.01339	4.46661	5.09044	3.91609	6.47846	3.57922	7.55612
Peak_967	Chr1	5444312	5445511	7.47924	8.57784	7.83402	7.36417	6.85596	7.23404	8.15045	7.09706	7.62581	7.51348	7.54499	6.4505	8.08059	9.38466	7.02719	8.73263	7.37102	8.38332	8.14086	6.2505	7.27787	6.71899	7.12309	7.29568	4.40124	4.97109	5.29574
Peak_968	Chr1	5445967	5450190	4.96172	7.815	10.0406	10.2764	6.66855	7.75468	10.434	10.6301	10.9189	14.1092	5.69605	9.98142	8.89063	9.96313	9.32803	9.69812	10.3624	9.24865	6.73315	10.8932	12.4852	4.1083	3.94797	4.4243	5.35865	4.59708	5.10532
Peak_969	Chr1	5454757	5455700	5.49207	7.12192	7.7871	7.53984	6.96694	7.19331	8.1075	9.11572	8.28511	5.69231	7.13585	6.15724	8.33387	6.66047	8.55501	8.0187	6.10152	6.39928	7.00873	7.66869	6.74928	8.11273	8.43138	8.97119	3.33111	7.1167	4.79728
Peak_970	Chr1	5459635	5461174	4.42862	5.59208	7.17823	6.68403	7.93715	7.73434	7.2711	7.12166	6.72779	6.54526	7.24761	6.6456	6.75021	6.20583	6.58689	6.40757	7.12059	7.09604	4.3443	6.60931	6.70644	7.6703	7.38744	6.47802	4.73603	4.90148	3.94402
Peak_971	Chr1	5461237	5462001	2.50973	2.85998	1.7061	1.5342	1.90164	2.41733	2.19172	1.87156	2.51833	2.81055	3.16295	2.39155	2.55056	2.91799	3.02113	3.30477	3.40576	3.30047	2.06924	2.73965	2.95237	2.63866	3.5884	2.52692	2.17882	2.70312	1.86296
Peak_972	Chr1	5465250	5465982	3.50062	2.71124	2.51614	3.68899	3.9738	5.58619	3.15302	3.20236	3.45577	3.65535	2.49371	3.80785	5.0704	4.67796	3.90876	2.56996	2.99156	2.25825	3.91773	3.40867	3.1306	4.11732	3.88858	4.15544	2.41747	3.20236	3.10369
Peak_973	Chr1	5469340	5470515	4.47429	4.44214	3.76702	4.57773	5.31435	6.74149	6.25926	5.84551	5.39123	6.59053	6.23829	7.20834	5.55198	6.26484	6.6087	5.81616	5.53381	5.88465	4.56235	4.41419	6.65762	4.49666	5.15361	5.20813	5.0991	5.49188	5.10049
Peak_974	Chr1	5471342	5471950	4.97995	4.09463	4.56158	4.90977	4.04874	4.32135	6.19457	7.14468	6.78838	3.67625	5.07172	4.65065	4.64526	3.71404	3.11483	4.48331	4.03794	4.75862	3.57908	3.8463	3.75453	4.36994	5.52788	5.44961	3.8544	4.42123	4.38343
Peak_975	Chr1	5473456	5474236	3.24548	3.64959	4.29364	4.53778	2.78876	3.40334	3.94215	2.8982	3.76114	2.95082	4.01791	3.03922	3.83902	3.98213	3.2097	4.75878	5.58173	3.51699	4.9924	3.76324	3.56119	3.50015	3.5212	2.44779	2.8982	2.14682	2.66247
Peak_976	Chr1	5478633	5479441	6.11798	5.59579	6.66456	7.7191	7.69471	8.78583	6.61986	5.89244	6.42073	7.59922	4.19379	4.26084	5.72786	5.50842	4.61236	3.5883	4.1938	4.79929	5.37634	6.70519	6.87587	5.86197	5.50842	4.91105	5.07766	6.57109	4.66316
Peak_977	Chr1	5487889	5488931	5.49243	6.50739	6.35767	5.82497	7.90374	7.40256	7.92581	6.85411	8.3923	6.56569	8.21421	6.40494	6.43489	6.72645	6.51999	5.38999	6.52315	6.85884	5.86752	4.73121	6.01409	6.35451	8.7611	7.36001	7.34267	4.0882	5.19613
Peak_978	Chr1	5489115	5490440	5.65657	8.3925	8.76563	8.48547	8.1334	7.79002	8.3801	10.4169	10.2619	7.73051	8.83257	8.82761	9.19828	9.17967	8.38009	9.471	8.76068	8.79167	7.19994	7.71316	7.20986	9.89868	9.3867	8.3801	5.76565	9.56026	5.37392
Peak_979	Chr1	5494458	5495023	1.80933	2.2711	1.77738	2.07361	2.90712	2.90712	3.72031	3.17431	3.35147	2.84613	3.14817	3.59542	3.67384	3.07847	4.59157	3.32533	3.94684	3.76097	2.8229	2.51796	2.48892	4.66418	3.96717	4.5393	3.55476	1.84128	3.55476
Peak_980	Chr1	5497036	5497825	4.93761	5.50773	5.58264	7.63217	8.41037	7.40953	8.85981	6.70208	8.87021	6.42326	10.2206	9.50068	7.14736	6.79155	8.1149	7.28053	7.70916	7.32214	6.16941	6.89767	6.98298	7.21603	8.4728	7.73621	4.96882	6.68544	5.83649
Peak_981	Chr1	5498041	5498860	5.85951	5.24409	6.09405	6.40677	7.11239	5.70715	6.23637	6.21633	5.11178	4.73491	5.3383	5.56883	5.90962	6.73352	6.57716	7.42712	5.25612	6.21633	5.39643	5.44054	5.64701	7.06829	7.91023	5.60893	4.01726	4.6848	3.81479
Peak_982	Chr1	5503455	5505435	4.20365	5.47321	6.47475	6.68635	7.09459	7.95341	6.76683	7.06141	5.35455	8.22973	6.6017	7.55678	7.95756	8.12434	6.72119	7.41655	6.98341	8.08535	6.95602	7.92935	7.43231	7.57504	7.91359	7.6464	4.62601	5.51636	5.09317
Peak_983	Chr1	5511010	5511784	6.33336	4.54322	2.78914	5.70554	5.43829	6.33123	5.25376	4.04902	4.68957	4.86985	5.31739	5.97915	7.04602	7.30902	6.4691	5.43829	4.42656	4.75956	5.7522	5.77977	4.0066	7.51265	5.58464	6.81483	4.00236	3.93237	4.81471
Peak_984	Chr1	5514217	5515215	7.19055	7.9277	10.0651	8.90674	11.2745	11.6513	7.21688	8.13996	7.67595	8.23704	10.6213	9.6011	9.20456	10.0783	9.83311	11.5263	10.3564	12.4757	9.92196	10.0223	8.96597	10.7496	10.3843	10.3185	8.24691	8.28476	8.19919
Peak_985	Chr1	5518286	5519358	1.98082	2.05895	1.5626	3.38716	2.71003	2.517	4.21901	3.0057	3.84827	4.57595	2.8908	3.2983	4.58514	5.14584	4.50854	4.88541	4.77051	5.38176	3.87738	3.12059	3.27838	2.93063	2.34389	2.27649	2.12789	2.4067	2.37453
Peak_986	Chr1	5525504	5526497	3.47445	2.54341	1.38581	3.02464	3.96229	3.13047	2.808	1.72482	2.40615	2.19282	3.18505	2.80965	2.80304	2.67901	2.9651	4.40549	3.37853	4.00033	3.74069	2.31519	1.6256	2.61452	1.77112	3.11228	3.20489	2.2292	3.46948
Peak_987	Chr1	5538931	5539895	5.37936	5.02846	3.98598	4.49189	5.12044	5.40661	4.58387	5.03868	4.67756	4.5992	5.48156	4.50892	2.85662	3.56182	3.90762	3.51754	3.70151	3.53798	4.72014	4.08988	4.34369	5.55481	7.2446	7.58357	3.30802	4.77806	3.56182
Peak_988	Chr1	5540356	5541228	6.45088	7.01011	7.2982	8.1361	6.43582	6.21928	8.77817	9.18677	8.58234	5.32113	9.4466	7.39422	7.81788	8.97587	7.78587	8.15304	6.92538	7.61076	7.58816	7.35091	6.14961	8.89115	9.68197	8.11538	5.6657	7.19652	5.57156
Peak_989	Chr1	5543048	5543713	5.68662	4.28224	5.42006	4.73391	5.62985	5.50151	4.2625	4.64506	5.28678	3.03089	5.78534	4.65493	5.40032	5.61504	3.6035	3.52452	3.77627	3.64052	4.08232	2.95438	2.87786	4.59817	5.80509	4.88447	3.65039	3.93917	4.07738
Peak_990	Chr1	5546665	5547682	8.14467	7.99934	7.46487	8.89228	9.67542	8.36103	9.40577	11.9312	8.0397	7.25011	12.125	10.8671	12.6175	12.0491	13.2924	9.02792	10.1405	9.47036	8.36103	8.01225	9.82074	9.77554	12.1492	10.5587	6.97722	8.8939	7.7765
Peak_991	Chr1	5556084	5557762	6.13655	5.54032	6.22956	8.19153	8.50188	7.98985	7.19194	8.27279	7.42593	7.80677	8.07404	7.34173	6.83949	7.53949	7.55712	7.08719	6.53893	6.41068	7.37697	7.02844	5.08801	8.2395	9.56903	8.43825	6.09151	5.98578	5.0929
Peak_992	Chr1	5561073	5562185	5.66539	7.08026	8.79494	5.13223	7.19397	7.43914	4.97124	6.24876	7.71384	6.46291	4.95499	7.00493	5.64914	5.99621	5.59154	4.65814	4.48682	5.79535	5.62994	4.07033	4.98305	6.47768	7.33133	6.19116	6.47029	7.47754	6.60026
Peak_993	Chr1	5563152	5563758	2.79471	2.90033	2.5889	3.26591	5.02885	3.43381	4.18394	4.05125	3.67483	3.14134	2.7243	3.01135	2.61598	2.90032	2.93824	4.14332	3.31466	2.60786	3.78315	3.10884	3.31466	2.90033	3.49339	4.02958	1.77919	3.04114	2.69451
Peak_994	Chr1	5569606	5570695	7.30657	6.46054	6.52841	6.38363	8.96543	7.93241	8.99861	8.84479	9.8944	8.86891	7.76954	8.63215	7.85852	9.2037	7.20401	8.75129	7.8917	10.371	6.75159	7.98519	9.01218	9.71344	8.23403	9.92155	7.07583	7.15274	5.92216
Peak_995	Chr1	5574280	5574660	1.88108	1.06566	0.698934	2.66199	2.20035	2.19603	3.70176	2.94243	3.28326	1.72145	1.30295	2.10543	1.76028	1.06134	0.660104	2.22623	2.30821	1.63085	2.31683	2.64042	2.87771	1.61359	2.11406	1.12606	3.12363	1.69125	4.02534
Peak_996	Chr1	5580734	5581944	8.24609	8.73475	10.6894	9.80437	10.2754	11.3083	10.1071	9.04016	8.8189	10.5781	10.9269	9.33335	8.77819	10.365	9.72292	10.6649	8.43341	9.57225	8.86505	7.6502	8.85148	11.1482	11.5649	10.5754	8.08863	8.09271	7.52667
Peak_997	Chr1	5590092	5591746	4.18645	5.53525	5.33362	5.88188	5.04161	5.72396	6.42319	6.57615	6.14707	5.37037	5.62265	5.60477	5.1171	5.62761	6.56522	5.16676	4.29968	4.53308	4.94626	5.0585	5.00586	4.7804	5.83024	4.89859	3.17534	3.33029	3.24387
Peak_998	Chr1	5614485	5615213	3.88286	3.44993	3.03278	3.81521	3.97982	4.81862	4.26393	4.50294	4.12413	4.94489	4.55029	3.44992	4.72618	3.42287	4.09256	3.33493	3.14778	3.44993	3.8558	5.34175	4.15344	5.39361	4.98548	5.26283	3.9708	3.93021	2.87494
Peak_999	Chr1	5617760	5618290	3.58476	3.63429	2.74274	4.02125	3.68691	5.7579	4.63728	5.36785	4.58775	3.47951	5.09853	3.79526	4.60013	3.21947	3.21947	4.93137	3.17304	3.85408	4.34319	4.34319	4.00267	2.8418	3.49189	2.87276	3.63119	4.16055	3.67763
Peak_1000	Chr1	5621923	5623564	5.25372	5.91744	5.25872	6.22377	8.63039	6.82342	7.48715	6.9796	7.36201	5.61611	7.21385	6.95456	7.04867	7.62129	7.56222	5.38886	6.15169	5.9685	6.11865	6.57815	7.69337	7.57625	8.35009	8.28001	5.38986	6.48406	5.74525
Peak_1001	Chr1	5628411	5629727	3.11908	2.02821	1.90964	2.61109	3.28508	2.671	2.41888	3.65952	3.13406	3.07789	2.62482	2.90565	2.86945	2.91314	2.42387	2.59736	2.72842	2.35023	2.63106	2.46755	2.11308	2.80081	3.05543	2.73216	2.58613	2.55742	2.173
Peak_1002	Chr1	5638991	5640099	3.77523	3.93531	3.44914	4.12948	5.88147	5.35232	4.51041	5.1122	4.20211	5.2367	6.33355	8.47536	7.61568	6.62258	6.91755	5.44273	6.46399	6.48622	5.59095	5.62653	5.0366	6.16903	6.02673	5.82367	4.49855	4.59935	6.06971
Peak_1003	Chr1	5644656	5645348	2.55938	1.93554	1.08874	2.27711	2.33878	2.73016	1.24529	1.3212	0.725828	1.81457	2.87485	2.41943	1.40185	1.68648	1.53942	3.39906	2.29846	3.60542	4.67044	3.29469	1.90945	4.14387	3.26623	4.35497	4.82937	2.81081	4.234
Peak_1004	Chr1	5648693	5649390	4.20367	2.91078	2.46804	2.74828	3.30642	3.21693	2.03943	2.00646	2.10066	1.50484	2.74593	2.32203	1.32115	3.14157	2.17837	4.51453	4.72413	4.96434	4.1024	3.77977	2.8731	2.70825	3.00027	3.53014	3.56076	2.23254	3.08034
Peak_1005	Chr1	5659283	5659973	2.54775	2.47877	4.23436	2.91172	4.9385	3.96079	3.13533	5.65216	3.16388	3.54211	5.24061	4.12969	5.45234	4.28907	5.29533	4.08212	5.28344	4.37234	4.87189	4.77674	3.03304	5.99472	6.04943	6.09463	3.97982	3.63965	3.63965
Peak_1006	Chr1	5665479	5666257	3.1884	3.34244	3.00693	2.07214	3.41207	3.29813	4.38062	5.29431	4.45236	3.68639	4.32154	3.1884	3.63997	4.41227	4.19493	2.39499	4.91871	2.47518	2.72628	3.44372	5.52642	2.71995	4.08943	3.58089	4.16961	4.37429	3.98181
Peak_1007	Chr1	5668287	5668989	4.88928	5.09271	4.25795	6.91654	5.85497	6.83937	6.09815	5.10206	5.11141	4.55724	6.31327	5.59543	4.44267	5.84328	5.65622	5.79184	5.71234	5.01554	5.24703	4.52918	5.869	6.80898	5.80821	5.59075	4.04984	3.36708	2.62585
Peak_1008	Chr1	5673057	5674293	3.65966	2.95005	2.88228	3.34206	3.61314	3.59188	3.16399	3.98788	3.78324	3.45634	4.47291	3.86297	4.36528	3.754	4.67888	3.68756	3.72743	4.03971	3.61979	4.03173	3.88024	3.44172	3.34738	3.34738	2.57531	2.09693	2.98194
Peak_1009	Chr1	5677955	5678879	5.65641	8.26515	10.371	7.78889	8.27225	8.51749	8.88179	9.7881	8.83203	9.5624	12.9993	9.75077	9.27808	9.67258	9.57129	8.51749	9.37226	9.14124	10.1222	8.0981	8.13364	9.84141	8.72008	10.6908	6.79728	6.75109	6.32814
Peak_1010	Chr1	5685671	5686389	3.92086	4.32323	3.63737	3.75397	2.99723	3.06124	5.46177	4.66388	3.96429	3.75168	2.59943	2.4874	3.26472	4.52213	3.67623	3.15269	2.97894	3.32416	3.31501	2.7526	3.71281	3.06353	2.91264	2.37081	1.7078	2.21534	2.0393
Peak_1011	Chr1	5687836	5688534	4.29408	3.69441	3.23819	4.1906	3.91781	5.16653	6.32823	4.0354	4.45163	5.1289	5.35936	6.26944	3.6803	4.07067	3.45924	4.75735	4.91961	5.35701	5.89553	5.00191	4.91725	4.30348	4.12946	3.35813	2.99833	3.71793	4.55745
Peak_1012	Chr1	5697227	5698221	5.21222	5.60871	4.62243	5.87799	6.76018	5.76234	6.59994	7.49865	5.85321	5.22378	6.96173	5.31794	6.0498	6.12579	5.90938	6.0878	4.86528	4.65547	7.73324	5.03709	4.05578	6.81966	5.764	6.8907	4.04421	6.28605	4.37793
Peak_1013	Chr1	5702086	5702956	5.30127	4.87098	4.8672	5.10122	4.70867	5.96368	6.00898	6.48646	5.5183	5.52018	5.23332	5.01251	5.90707	6.60157	5.80704	5.05026	5.40129	5.43526	6.22601	4.69357	4.56524	6.19771	6.51854	7.02621	3.61596	4.99553	4.22931
Peak_1014	Chr1	5705911	5706547	4.07205	3.85013	3.19984	3.47079	2.74051	3.79852	5.33135	4.48236	5.26941	5.0191	3.35983	3.25403	4.00238	4.00238	4.33526	2.57536	4.97007	3.25145	3.50176	3.24629	3.43725	3.61788	4.02561	4.03851	2.72502	3.85013	3.64369
Peak_1015	Chr1	5709592	5710465	5.84918	6.05042	4.31636	7.23907	7.30865	8.45215	5.33385	8.13995	6.41717	6.8347	10.1994	8.97689	8.71171	7.44594	9.06528	6.59772	7.67728	7.09049	7.69609	6.96259	6.72373	7.96692	9.2308	7.97445	6.86479	6.71433	6.67859
Peak_1016	Chr1	5713919	5714767	4.14723	4.17433	4.18982	4.69903	5.52382	6.44543	5.68453	5.62838	6.00012	4.61964	6.97593	5.19662	4.50929	5.3457	4.99526	3.72321	4.85392	5.51608	3.67868	4.96041	3.43085	5.16758	7.92659	6.80749	2.99135	4.32148	4.34471
Peak_1017	Chr1	5722852	5724268	9.95786	10.3082	11.9717	9.93466	10.5773	10.9091	10.539	10.8639	10.7676	8.66672	8.59827	7.32338	7.15866	7.70736	6.99509	7.39183	7.7468	6.15754	6.44871	6.62619	7.14357	8.29435	11.6689	9.00198	7.69344	10.5309	8.99269
Peak_1018	Chr1	5726701	5727293	1.94871	2.16769	1.74358	3.13512	2.36173	2.99652	2.71932	2.92999	2.49479	1.78516	0.659733	0.557169	1.36382	0.917527	0.848228	1.27234	2.21482	1.83783	2.56132	1.88495	3.17947	2.65279	1.63824	2.31738	3.04918	2.82743	3.09908
Peak_1019	Chr1	5727594	5728329	5.38922	4.40652	5.0207	5.9632	8.076	7.0799	8.76836	9.07657	8.985	7.57795	7.55338	9.52325	8.27255	8.20107	9.9543	6.84093	8.42665	8.02017	5.1681	7.86159	7.88839	9.88507	8.71253	8.7907	5.69519	8.7505	5.59915
Peak_1020	Chr1	5730734	5731838	2.73122	2.27602	2.49469	3.08824	3.52559	3.34113	3.4408	2.58097	3.87815	2.33254	3.73088	4.42707	2.78923	2.39948	2.65089	2.32957	4.78856	2.87105	2.99006	2.83832	2.27601	4.47319	4.17121	3.63419	2.26114	3.48989	2.56014
Peak_1021	Chr1	5738072	5738850	2.64821	2.44564	3.45428	3.19684	2.53848	2.39499	3.57033	2.56802	3.75813	4.55787	2.25994	4.27511	2.92253	3.22005	3.77923	5.43569	4.36585	4.75201	4.4397	5.40403	3.39519	3.55556	3.75181	4.87861	4.51989	2.38444	3.62309
Peak_1022	Chr1	5743640	5744350	2.38361	1.60911	1.87267	2.62868	3.24365	3.25521	3.19279	3.66442	2.7119	3.1373	2.52232	3.20897	3.41011	3.88406	3.1766	2.72115	3.0795	2.95003	2.3235	4.0089	3.8725	2.72346	2.18709	3.56732	2.59399	1.9559	2.30963
Peak_1023	Chr1	5744386	5745212	5.92917	7.19332	7.31655	7.29667	7.78364	7.46363	7.71011	5.16989	5.70257	7.2589	7.20722	7.01243	6.10011	7.93669	8.70989	7.55706	8.57871	7.01045	5.86953	5.97091	7.58687	7.1476	6.39825	7.15754	5.75028	6.4877	7.49742
Peak_1024	Chr1	5754855	5756104	2.28026	2.68266	2.34733	4.80775	3.54269	4.07133	3.8228	4.56316	3.75573	3.48746	3.69655	3.79781	4.08186	4.30409	4.80775	4.0503	3.49404	4.08843	3.46247	3.36385	3.27837	4.50398	4.63811	4.40798	3.62028	3.51508	2.77471
Peak_1025	Chr1	5758698	5759417	5.12086	6.34229	6.33772	4.24189	7.66644	7.6185	6.98382	6.94729	7.14134	6.96555	7.30572	6.99523	7.20756	6.40621	7.02263	6.82857	5.19392	6.43132	5.59344	4.89027	5.78979	7.97923	8.01347	8.1436	3.95651	6.61168	5.35601
Peak_1026	Chr1	5760551	5761268	3.46615	3.26926	2.3535	4.93824	3.66991	3.63327	5.33201	4.12092	3.94692	3.76148	4.45975	3.57146	4.51241	3.66304	4.41625	3.7157	4.43686	3.8439	4.20105	4.34986	2.66944	4.58567	5.15573	5.23586	3.83703	4.75737	3.44554
Peak_1027	Chr1	5763082	5764171	9.22935	10.6228	9.16148	7.67453	8.60199	9.18561	8.61406	10.2563	7.92185	9.53699	10.9983	11.7101	13.0372	11.968	13.1759	9.6139	11.2547	9.34245	11.4733	8.5477	9.27458	11.7433	10.6017	10.2051	8.70303	9.30023	8.38332
Peak_1028	Chr1	5767250	5768223	5.90178	6.82999	8.07549	5.95747	7.93204	7.77508	7.62151	8.06368	7.72108	4.53476	8.46365	6.47052	7.93035	7.89997	8.19531	8.00461	7.0072	6.00979	6.54984	6.42326	5.76676	7.15571	9.5657	6.12117	6.62409	6.45533	5.09675
Peak_1029	Chr1	5772484	5773361	4.86958	5.43124	6.3636	5.45184	7.49814	5.61284	9.3198	8.73942	8.2751	7.22855	7.26225	7.19298	10.2035	8.26013	8.36684	5.85062	7.266	4.84899	6.35423	7.43262	7.06567	7.12371	5.41439	6.87471	6.91589	6.8279	5.44247
Peak_1030	Chr1	5773493	5775374	8.89323	11.2436	12.5171	10.9895	13.1154	11.7126	11.5816	11.1903	11.4532	9.94658	13.3512	12.5511	12.9879	13.7128	12.1878	13.1992	13.8884	13.7259	10.0828	9.17621	8.46	12.1625	12.7669	11.006	7.43897	9.04259	7.88442
Peak_1031	Chr1	5777628	5778547	7.76154	7.10045	6.43936	8.66205	7.23981	8.02597	8.32257	8.83715	9.23916	6.84673	9.99137	10.1468	7.92771	8.10638	9.93062	6.97181	6.14455	7.47209	5.91764	8.74245	6.77705	9.21237	9.56614	7.72938	5.39413	8.01883	4.64727
Peak_1032	Chr1	5781676	5782474	6.53195	7.35282	6.45377	6.04026	8.9534	7.98852	8.26832	8.9102	7.83422	9.07478	9.63025	8.89374	8.09139	9.01717	8.5728	9.17148	7.97413	6.8282	7.25612	7.38573	8.72504	9.15708	9.56442	9.7681	7.34458	5.95591	7.86097
Peak_1033	Chr1	5786378	5787134	3.69147	3.98461	4.66428	5.218	5.6284	5.598	4.1757	5.42646	5.18542	5.33308	6.24726	5.94543	5.7044	4.83365	5.00085	4.31902	4.94222	5.58715	4.3733	6.206	4.73376	4.51662	4.77285	5.70006	4.5101	4.03456	3.36575
Peak_1034	Chr1	5788413	5789322	6.81179	7.18209	7.08997	8.01844	10.9809	9.4292	8.11598	8.27314	10.2764	7.83238	8.75182	6.58418	9.24135	9.37501	7.41511	7.48195	8.28759	7.54156	4.94762	7.98592	6.26807	7.19474	8.47545	8.7464	5.80745	6.97436	6.25181
Peak_1035	Chr1	5789797	5790374	3.28473	1.81158	2.14432	2.45715	2.30358	1.43334	2.25239	2.49412	2.16423	2.02772	1.88552	2.32064	2.14432	1.76039	1.29399	2.99181	3.2307	2.77283	3.68004	2.08175	1.30536	1.78314	2.68467	1.97937	1.89405	1.92534	1.73764
Peak_1036	Chr1	5805322	5805862	3.61269	2.99589	2.60089	2.2697	2.99285	3.29061	2.66166	4.13834	4.06541	2.54316	3.3605	2.56747	2.74674	3.72511	3.21161	3.09008	3.25416	3.50331	2.16944	2.78927	3.82234	3.31796	4.36926	3.94084	3.30581	3.76157	3.06881
Peak_1037	Chr1	5824794	5825601	3.52764	4.87644	4.57535	5.29349	5.51116	4.95984	4.38005	6.47344	3.70056	5.06563	5.02901	5.24873	4.32715	4.31291	5.52947	5.31383	5.93839	4.08709	4.77268	5.38707	4.94154	5.98518	6.4775	6.29238	4.70148	5.23246	3.28961
Peak_1038	Chr1	5828893	5830021	6.31745	7.11095	8.10538	9.13621	9.21191	10.3083	7.72246	8.46792	6.99447	4.50476	7.90154	6.18495	4.82654	3.60352	4.1597	4.70569	5.99422	4.45526	4.79013	4.63726	4.94156	7.17647	6.36404	6.00005	5.83406	7.6482	6.60281
Peak_1039	Chr1	5837457	5838287	7.16858	4.14409	4.39135	6.44856	8.04685	7.41781	7.27342	8.48994	6.96088	9.09127	7.9519	9.25545	7.00836	7.11912	5.22808	7.54442	8.23477	8.20114	7.06176	6.20723	6.08854	7.00044	8.30005	8.575	7.13891	5.96986	7.12704
Peak_1040	Chr1	5840900	5841747	6.72248	5.53422	5.35976	6.63331	7.50947	7.4552	7.77504	7.47265	7.28074	5.63501	8.89739	7.31563	5.7804	8.62795	6.01882	6.03821	4.7918	4.817	7.39317	5.7552	5.33843	7.38542	9.24244	7.60446	6.02658	6.11962	5.73387
Peak_1041	Chr1	5842270	5842844	2.36134	3.33618	2.61005	2.01257	3.5563	2.89593	1.31217	1.89536	2.18695	1.3379	3.34189	2.37563	3.14178	3.23326	2.73012	3.06174	2.8702	3.86219	3.01313	2.4471	1.85819	4.69409	3.51056	4.23955	4.73983	2.47855	4.7484
Peak_1042	Chr1	5844600	5845711	6.61507	7.80208	7.23592	8.15242	7.43844	7.01123	6.7348	5.69118	5.23292	6.56924	7.99425	7.62026	8.10808	7.51087	9.23892	8.84571	9.13988	8.92997	6.07255	7.93216	6.23664	6.73333	7.33496	7.71783	8.36972	7.13688	7.46357
Peak_1043	Chr1	5850010	5850901	6.84789	7.12616	8.35716	7.86512	10.6072	10.1815	10.2368	9.32095	8.64647	9.08875	11.4199	9.13482	7.54263	6.45905	7.4984	5.24833	6.34665	7.15196	7.83748	6.43878	6.1384	9.36333	10.0083	9.95303	6.01862	8.43824	6.58252
Peak_1044	Chr1	5851813	5852749	8.96453	8.1593	7.11548	7.38389	8.29087	9.04697	10.1101	8.78559	8.82067	10.2522	12.9784	10.7978	10.768	11.6363	10.768	7.31898	10.3346	9.93641	9.43643	9.23644	8.20315	9.04873	10.1487	8.67857	7.05408	9.42065	9.30486
Peak_1045	Chr1	5854030	5854897	6.36495	6.42744	6.37442	8.43105	8.06744	7.17358	8.86661	9.00107	8.05797	9.44231	11.8796	12.8568	8.51627	9.52374	9.04651	6.36684	8.98592	7.23608	9.03515	7.82314	9.17529	10.196	10.7983	10.0313	6.47099	7.6546	6.18125
Peak_1046	Chr1	5857293	5858328	1.15668	1.6184	1.65648	2.12455	3.2368	2.82744	2.58944	2.70368	2.22927	0.820307	1.80245	1.78341	1.78024	2.62911	1.65648	2.75604	1.78183	2.45934	2.50852	2.28004	2.29432	3.09083	2.64974	2.74811	1.45815	1.94208	2.39587
Peak_1047	Chr1	5861909	5862744	4.64036	4.02099	4.20779	4.18419	5.60775	5.31478	6.87403	5.91646	6.68723	5.7159	4.89794	4.51845	4.28447	5.25776	5.14962	4.52435	4.82322	3.87942	5.20664	5.01395	3.4842	6.2173	6.74819	6.75802	2.90809	4.77407	4.2943
Peak_1048	Chr1	5863587	5864016	1.51764	1.70878	1.54057	1.93814	0.584883	2.21338	0.516073	2.52685	1.37619	1.16977	0.684274	0.779844	1.03979	1.25004	0.928931	0.779844	1.0245	0.672807	2.93588	1.747	1.45647	1.36473	0.58106	1.44883	1.94961	0.424327	2.14457
Peak_1049	Chr1	5867561	5868559	8.26337	5.94495	5.11895	6.94538	6.71337	6.66894	9.03673	9.46783	8.07085	9.41352	11.0096	10.7891	8.88699	10.8533	10.4863	9.43821	9.43657	9.79527	6.25265	8.47727	9.23746	9.89564	8.25185	9.56326	7.46369	9.06141	8.22388
Peak_1050	Chr1	5878415	5879254	2.79248	1.61639	1.59682	2.41285	2.79444	2.72399	3.14864	3.01753	2.9549	1.04498	4.11338	2.52635	1.69663	2.65354	2.29543	2.542	3.45783	2.6418	1.9608	2.91577	3.76897	3.28562	4.53803	3.09385	1.88449	2.79444	2.1017
Peak_1051	Chr1	5883944	5886364	8.65213	9.98834	10.3692	9.1471	10.1153	8.86328	9.53954	10.685	10.1581	8.67317	10.5505	10.6422	8.42535	10.1207	9.22993	9.13895	9.10704	9.93403	8.70101	8.27937	8.82186	11.4916	11.7387	10.4575	8.62225	8.69626	8.14018
Peak_1052	Chr1	5895287	5895864	2.32064	2.38605	1.30536	2.79842	4.06112	2.71595	2.03056	2.36046	2.27514	2.77283	3.59472	2.25808	3.20795	3.68572	3.5094	2.98897	2.95199	2.53394	3.37289	2.95484	3.44684	3.18235	2.03056	2.86952	1.15463	3.21648	1.88552
Peak_1053	Chr1	5897935	5898754	0.613414	2.09282	1.68388	2.09282	0.92012	1.30501	2.65412	2.14695	2.55589	3.34972	1.75003	3.90099	3.57825	3.06707	3.32967	3.01495	2.96283	2.93476	3.8208	3.66043	2.45566	3.15327	2.71225	3.41587	4.28387	2.07077	2.71826
Peak_1054	Chr1	5899919	5900484	1.69316	2.34661	1.54214	2.35242	2.36984	1.69897	1.9255	2.76772	2.08813	1.3737	1.99229	1.44921	2.43083	3.41246	2.66607	2.07361	3.40665	3.28758	1.62927	1.77738	2.32918	2.66607	1.60603	3.49959	3.19754	2.1317	2.19559
Peak_1055	Chr1	5910918	5911814	4.77377	5.3272	5.04682	5.24473	5.89894	6.26179	7.08643	5.88795	5.88795	4.95335	6.48169	5.08346	6.70893	6.73641	7.57022	7.56473	5.98141	7.56473	6.3864	6.62096	4.51538	8.93547	7.57756	7.99171	4.74994	6.90318	4.22034
Peak_1056	Chr1	5919423	5920150	4.63332	3.97625	5.71036	4.92911	5.6381	4.83427	6.43742	6.73321	6.84385	6.23872	7.50317	6.16646	5.79165	6.19807	5.22941	5.26329	7.01997	6.92514	6.0626	5.13909	7.15544	6.73547	7.08997	7.14642	3.39144	6.05357	3.9627
Peak_1057	Chr1	5922649	5924387	3.80274	3.99273	5.28205	6.00139	7.90417	7.5204	7.5913	7.37295	7.47597	5.29339	5.74711	5.33026	4.51168	4.86047	4.41053	4.3973	4.22621	4.9654	4.72435	4.83495	5.00226	4.81416	5.4522	4.42566	3.90482	3.87269	3.51916
Peak_1058	Chr1	5929742	5930461	8.23036	5.31035	7.0409	6.81031	5.83088	6.70985	7.2829	7.81256	7.09112	6.28749	6.4199	7.45184	6.73725	7.18472	7.18472	6.76008	5.83088	6.33544	6.824	6.28521	5.91764	8.3331	8.49748	8.84906	6.28749	7.10254	5.35373
Peak_1059	Chr1	5933782	5934705	7.50379	7.75107	8.54272	7.94854	8.85404	9.33259	8.33636	9.12623	9.05862	4.96339	7.53047	6.24248	6.55914	8.33991	6.28162	4.84242	7.21559	6.45952	6.0717	5.58247	8.59253	6.08593	8.40396	6.80287	4.71788	6.9861	5.71768
Peak_1060	Chr1	5941719	5942290	2.79904	2.63524	2.49729	3.77899	5.58083	4.88251	4.68997	3.71577	4.69572	2.38234	3.76749	3.31919	2.63811	3.41402	2.78467	2.77892	3.20137	2.94273	3.71289	3.73588	2.79616	2.63811	3.70427	3.37379	2.92261	3.6468	2.97146
Peak_1061	Chr1	5946538	5947929	5.92213	7.10655	8.10794	8.26618	10.5075	9.90878	8.0796	7.5978	7.56473	5.1947	6.5291	5.81348	5.2136	5.45095	5.46394	7.01917	6.62475	6.97193	5.967	5.69303	6.22561	9.27347	9.08926	8.5921	5.16754	5.46158	5.48047
Peak_1062	Chr1	5953985	5955033	5.43281	6.47017	8.38035	8.39915	9.17481	8.33803	10.4222	8.67181	8.96013	5.74621	9.413	6.83527	6.1834	8.77836	6.57829	7.1048	7.54983	6.73499	5.87783	5.22439	6.15833	9.59791	9.01028	9.71544	5.64592	6.4686	6.85408
Peak_1063	Chr1	5955740	5957213	3.52734	4.2801	4.69606	6.82496	6.95766	5.04734	5.25366	5.72315	5.87593	1.8356	1.87909	2.38873	2.47684	1.64936	2.32628	2.71103	2.12444	3.07123	1.75642	1.54342	1.20552	2.22257	1.15534	2.38985	2.86938	2.04749	2.86157
Peak_1064	Chr1	5969225	5970056	6.52576	7.06711	7.6045	7.83763	7.73884	8.51529	5.03806	7.47213	7.19552	5.74535	7.35753	6.74111	6.60874	6.87743	7.57881	5.5142	6.85175	6.49415	5.29687	5.56359	6.82211	7.13626	5.2455	5.937	6.82607	7.02562	5.23957
Peak_1065	Chr1	5977385	5980174	2.55877	4.83769	6.0396	6.04137	5.9795	5.98244	6.34008	7.25624	6.55983	3.24516	1.62258	2.0132	2.82449	3.48672	2.90756	3.21275	3.34237	3.3082	1.74454	2.03735	2.25888	2.13339	1.45938	1.71272	2.43387	2.11159	2.28422
Peak_1066	Chr1	5982233	5983286	5.43355	5.19493	4.72394	6.71864	5.56611	5.96536	5.22301	5.35401	5.43043	6.56891	5.16218	5.87334	5.28227	8.0084	7.12412	7.05706	5.68464	6.87303	5.99031	5.82344	6.22737	4.76605	5.93105	5.51153	6.20397	4.42451	5.28539
Peak_1067	Chr1	5986591	5987825	10.861	11.3455	13.539	14.1566	12.0216	14.8194	14.5545	14.7355	14.9205	12.6112	15.5661	14.5585	17.1127	16.0479	14.5332	14.4361	15.2134	14.1459	12.1334	14.6144	13.0478	14.8966	18.3439	15.4756	11.8792	11.5238	10.861
Peak_1068	Chr1	5996079	5997840	4.71213	3.86132	3.24093	4.65989	5.13567	5.24109	5.21404	6.4828	4.53208	5.46406	8.06314	6.09004	6.72256	7.8691	6.28781	7.39145	5.95384	6.53691	6.39417	6.2449	5.93238	5.78405	7.46982	5.75699	5.23363	5.42021	6.04246
Peak_1069	Chr1	5998828	5999287	1.09348	0.846909	0.546738	1.11849	0.728984	1.00057	1.39365	0.911231	1.12206	3.35547	1.36506	2.72654	3.42694	2.84447	3.66636	2.84447	3.30187	2.81588	2.88735	2.22983	4.53114	2.21554	1.00057	0.728985	1.61163	0.546738	2.00471
Peak_1070	Chr1	6002841	6003551	4.0274	4.32564	3.77309	4.64931	4.57532	5.58564	6.29772	6.6029	6.42488	5.54171	6.45031	5.31977	3.85863	5.44461	5.65962	4.12681	3.66442	4.39268	3.89099	4.55221	4.33488	6.14514	5.31052	5.08395	4.0089	4.71636	3.72684
Peak_1071	Chr1	6007706	6008228	1.10634	1.54321	1.38292	1.5275	1.28863	2.05238	1.33263	1.49921	1.83551	3.121	2.08695	2.13724	4.32791	3.04556	1.72551	3.17757	2.69984	2.82556	1.90466	2.30696	2.40439	1.99895	1.09691	1.67836	1.17862	1.93609	1.86694
Peak_1072	Chr1	6008522	6009202	3.60378	2.12413	3.15723	4.28206	4.71412	3.60137	4.34482	3.2731	3.40585	3.41792	4.66102	4.19757	4.30861	4.33033	3.59895	3.34551	4.15413	4.0624	4.1324	3.01965	3.25378	3.23206	5.52999	4.02378	3.93206	2.09275	3.61585
Peak_1073	Chr1	6017956	6018794	2.93492	3.49721	2.97998	3.748	4.5787	4.58262	6.15	5.69155	5.59554	3.7813	4.78442	5.141	5.79538	6.5007	4.96859	4.53364	5.24484	5.09202	4.93528	4.89218	4.18686	6.85728	5.99523	5.3957	3.76954	3.95175	3.39925
Peak_1074	Chr1	6023732	6024346	3.22076	2.5178	2.38149	3.13523	3.32767	2.57393	3.48804	3.99855	4.20435	3.81412	4.11882	4.04131	4.19634	4.55449	4.04399	4.51708	5.23072	3.46398	2.8626	3.32767	4.5732	3.81412	4.36205	4.918	3.90767	2.14628	3.18066
Peak_1075	Chr1	6026725	6028497	7.58479	6.81806	7.80452	6.96362	8.59906	7.97696	9.0311	8.72794	8.80859	8.84289	9.61148	10.2484	9.11084	10.4403	9.02924	8.23656	8.41642	7.92783	8.24861	7.94822	9.4928	10.5915	9.89889	10.9475	6.40734	8.05299	6.45092
Peak_1076	Chr1	6034244	6035390	5.70095	6.63965	8.57006	7.08965	10.1279	8.32356	8.9828	8.44251	9.51591	7.87642	8.06416	7.46512	8.9484	8.54999	9.28231	8.17165	6.525	7.66576	8.35509	8.43391	8.2691	7.05382	8.23328	8.61879	6.28566	5.37277	5.92022
Peak_1077	Chr1	6039112	6039862	4.85695	5.73247	3.72972	4.80004	6.85751	6.15709	7.29089	6.81374	8.47065	4.85694	6.00606	6.22713	5.85504	4.28786	4.71467	3.67062	5.47419	6.39567	6.09799	4.98608	5.50264	5.6668	7.13549	7.34561	4.22438	4.86789	4.52425
Peak_1078	Chr1	6052069	6052521	1.43695	1.99214	1.85062	1.40067	0.89991	2.97914	3.33112	2.40218	2.40581	2.79045	2.08286	2.48564	2.92834	2.83036	2.57636	2.47476	3.27669	2.0502	2.73965	4.1766	3.17146	2.26066	2.07923	2.45661	2.0248	1.4805	1.29544
Peak_1079	Chr1	6055829	6057755	3.26625	3.56822	3.08882	3.12891	3.69788	3.81645	3.48036	4.04592	3.08882	2.88409	4.50314	2.80135	3.59126	3.65864	3.12806	3.72262	3.7866	3.69874	3.69959	3.0274	2.69728	3.61258	4.26089	4.43917	3.24578	2.81585	3.13915
Peak_1080	Chr1	6062155	6063285	6.19291	8.6942	7.31639	10.9208	8.55467	10.6287	8.7131	9.67525	7.71606	7.7117	9.73628	9.37293	8.27417	9.33951	9.73337	8.94564	10.1113	9.04593	9.24067	7.87303	7.89774	8.52997	8.49218	9.64036	9.04156	8.0518	9.85837
Peak_1081	Chr1	6064522	6065209	2.16942	2.30561	1.46699	3.15856	2.76911	4.0354	3.61968	2.54692	2.66638	3.64596	2.45135	3.24457	4.43441	4.56581	3.34014	3.15617	3.56473	3.39987	4.46546	3.18484	3.61012	3.12511	3.67702	2.94592	3.72719	2.94592	2.73089
Peak_1082	Chr1	6068582	6069427	2.96504	3.78305	3.66064	3.38473	4.14444	3.57903	4.06867	4.68266	3.91128	3.36918	3.03304	3.61789	4.45921	5.01103	4.6574	2.86206	3.82385	2.55312	3.4469	4.19108	4.16776	3.76556	4.49613	4.85559	3.20986	3.17683	3.63343
Peak_1083	Chr1	6071320	6072116	3.68151	3.13083	4.12907	3.60932	4.86124	4.01356	6.77109	5.2593	7.06602	7.30114	5.41398	5.8966	6.06366	7.46614	6.86183	4.69006	5.63673	5.89454	5.27992	3.98263	4.60962	4.57662	4.23631	4.57043	4.41781	5.57486	5.34386
Peak_1084	Chr1	6073390	6074634	6.96465	4.30158	2.42409	3.3668	7.26831	6.39295	1.54873	1.6834	1.81807	7.04386	12.5258	9.47588	10.1756	13.1133	10.6206	11.1144	11.529	11.8973	11.9871	8.31532	6.38107	12.708	13.5147	11.084	6.32957	7.51918	7.00425
Peak_1085	Chr1	6075976	6076734	4.32063	4.22967	4.25999	4.68664	4.57402	5.74351	4.13654	4.08673	4.44624	6.89135	5.82797	7.95255	3.4565	5.97741	4.47223	4.44191	3.49332	3.45867	4.42891	5.58974	5.46413	5.89295	4.98118	5.68721	4.81658	4.63899	3.64492
Peak_1086	Chr1	6087635	6088447	5.67138	7.05636	6.33455	7.86309	7.05838	6.53471	7.42435	7.05839	8.06528	7.09477	9.07217	7.92374	7.81861	7.39401	6.61559	6.60144	6.44373	7.01997	6.71062	7.37784	7.23226	6.60751	7.72763	6.85822	4.92328	6.30018	5.33574
Peak_1087	Chr1	6097463	6098437	6.30709	7.14837	9.12598	7.85141	10.9367	10.7529	7.21075	9.70931	8.16667	6.89379	11.0951	8.72641	7.93065	8.96412	6.9764	6.99327	5.34948	5.98508	8.77867	7.42149	7.66764	8.49038	8.25604	8.23918	5.24495	7.35406	6.84996
Peak_1088	Chr1	6098990	6099896	7.22941	8.21351	7.32003	9.3879	9.27734	10.1781	8.22619	9.93704	8.71552	9.96784	11.3815	8.68108	9.70506	9.3444	9.11061	10.0838	9.47308	9.06349	8.91488	9.23022	8.88044	13.2681	11.3797	11.7802	7.89634	8.41105	9.00368
Peak_1089	Chr1	6101152	6101802	1.84832	1.67409	1.80287	2.00234	2.16394	2.16394	2.07809	2.31797	1.86094	1.17413	2.34069	2.27252	2.12102	1.26756	0.772656	2.39877	3.77743	3.48453	3.66885	2.18667	2.06547	1.91902	2.17909	1.74226	2.11849	2.03264	2.74722
Peak_1090	Chr1	6106395	6107279	2.8418	3.30058	3.43245	4.09183	3.67763	5.08367	4.07325	4.5246	5.02052	2.47404	4.2497	3.02197	3.43803	3.59962	3.39902	3.51975	3.49003	3.59962	2.05984	2.8418	3.39345	3.12599	2.41275	4.22742	2.86966	2.6635	2.27344
Peak_1091	Chr1	6115850	6116695	3.14962	2.99613	3.04859	4.76038	3.8083	4.26491	4.37372	5.24613	4.26102	5.00131	6.17878	5.17035	3.546	6.39445	4.52722	4.2552	4.70209	4.31543	3.9074	5.11984	3.8938	4.83422	4.31737	5.00714	2.63472	2.57644	4.06284
Peak_1092	Chr1	6123590	6124591	4.34571	3.22032	4.51796	4.11275	4.50483	4.29813	4.59014	4.48843	4.11603	6.25033	3.59435	4.60654	4.92809	5.27915	5.49898	5.97637	4.69513	5.08393	5.22665	5.32837	4.86902	4.3375	6.03215	4.35063	2.87745	3.76497	3.1793
Peak_1093	Chr1	6126544	6127575	7.7634	7.62004	8.37663	7.48466	7.63597	8.02939	8.93571	9.52824	8.89589	10.9665	9.9137	9.51868	9.25268	9.63814	9.14437	9.34666	10.4393	10.7913	7.9402	9.404	8.68563	9.84999	10.6894	9.91689	6.99565	7.57385	7.58181
Peak_1094	Chr1	6134486	6135388	6.49324	8.12793	7.89856	7.36519	9.56237	7.9386	7.05573	8.14977	7.0357	7.47805	8.84878	7.88581	8.07696	6.68437	7.33424	9.09818	7.41434	9.14551	6.01994	8.63762	6.91738	7.75293	6.32577	7.80572	5.84883	6.59154	5.27541
Peak_1095	Chr1	6142593	6144258	4.24267	3.83518	3.51451	3.30632	4.0256	4.62944	3.4415	4.24761	3.51648	3.47208	5.1731	4.89979	4.24761	3.93187	3.68816	4.23577	5.08134	4.84059	3.10603	3.91806	4.33246	5.03201	5.4839	5.63585	3.65363	3.69507	4.33542
Peak_1096	Chr1	6148110	6148932	5.33283	5.40273	4.99528	5.5006	6.67102	5.38475	6.72296	8.2509	6.75491	6.20165	6.97262	7.8794	7.36809	8.26088	7.49991	5.25493	5.00726	4.78756	5.72829	5.78821	6.3175	6.66503	4.72564	5.81018	3.87678	5.09315	4.65174
Peak_1097	Chr1	6149391	6149790	3.09032	2.94649	2.21912	2.65883	2.15747	1.65201	1.73009	2.28076	2.00953	3.04923	2.56431	2.33007	1.16709	1.63146	0.628749	2.74513	1.98077	1.67666	1.46708	1.46708	2.23966	2.26432	1.85337	1.63557	2.62184	3.75195	1.98487
Peak_1098	Chr1	6153087	6154052	6.33522	6.33522	8.0709	8.96937	8.55076	9.57175	8.60181	8.19002	8.22575	8.64605	9.05615	9.68065	6.29949	8.33805	7.7646	5.41634	5.95746	4.98242	7.36301	6.75723	7.89733	9.33182	9.38457	7.76801	6.24844	7.35621	5.42824
Peak_1099	Chr1	6155101	6155842	4.40411	3.42936	3.48253	5.38108	4.82724	4.78737	6.23178	5.89061	5.31019	7.13342	8.0262	7.47458	8.59334	6.80112	7.62744	7.76701	4.8206	6.34919	5.31462	5.51178	5.12188	5.73111	6.71472	6.96727	4.85826	4.17593	5.08422
Peak_1100	Chr1	6164767	6165821	2.46335	2.1938	1.98969	3.49169	3.01491	2.66745	2.40414	2.70173	2.14549	3.17851	2.02864	3.66463	2.85131	2.8591	3.12398	3.68178	3.17228	3.20032	2.98998	2.36674	3.95911	2.54281	2.81703	3.01959	2.74848	2.7812	2.43218
Peak_1101	Chr1	6168175	6168954	5.15475	5.95347	5.50248	5.30438	6.32015	5.62049	4.74802	6.65102	5.76379	3.82075	7.23688	5.69636	5.39078	5.30438	5.98086	5.58256	7.07672	5.20955	5.18847	4.73537	4.33496	4.46773	6.76272	6.77536	3.90083	4.95455	3.87344
Peak_1102	Chr1	6172294	6173228	1.74751	1.85124	1.51193	3.14693	2.98167	2.93245	3.85543	2.7373	3.49678	2.95882	3.40712	3.58293	5.76996	6.41165	5.70139	4.66238	3.35438	4.0664	3.13638	3.58469	3.46338	2.15187	2.4525	2.30834	2.34174	1.17439	2.0288
Peak_1103	Chr1	6184803	6185832	4.842	6.42354	5.59846	6.72038	4.96328	5.37822	9.0951	8.34023	8.36576	9.07913	7.49918	8.1168	9.08393	7.40343	10.0239	7.47685	8.54611	7.96519	6.70761	6.98849	7.20873	6.51132	6.57356	5.67825	4.61856	6.18575	5.07819
Peak_1104	Chr1	6190910	6191733	4.57029	4.77976	3.09407	3.94589	5.32436	4.61817	3.96784	5.56574	3.76635	3.44717	4.27305	3.82221	6.64498	5.79914	4.63413	4.08154	4.11945	4.37479	4.39274	4.36083	4.90742	4.89945	6.10037	4.7618	3.45914	4.69996	4.17131
Peak_1105	Chr1	6204260	6205055	6.32322	3.97111	5.76152	7.8906	7.31857	8.08058	5.56534	6.90557	5.48686	5.00364	7.79767	7.16782	4.84463	6.37484	5.63348	7.2463	6.00313	6.45332	7.82038	5.61283	4.91071	6.8209	9.07182	9.13377	4.94995	5.2721	5.05527
Peak_1106	Chr1	6208943	6209597	2.04783	1.71406	2.73798	3.82463	2.17582	3.25746	2.81577	4.29142	3.41055	3.91498	3.2675	2.48701	4.22617	2.76809	4.29142	4.21111	3.64645	4.1308	3.19974	3.17966	4.01285	3.58371	2.88102	4.0254	2.68778	2.4318	3.7117
Peak_1107	Chr1	6212678	6213487	5.17895	6.21393	5.17489	5.49756	8.61669	7.53301	7.65275	5.71876	6.88159	4.03032	6.19769	4.90092	4.45041	4.46258	4.19876	4.61073	3.47225	4.8441	4.48693	3.39513	3.51892	6.12667	7.40923	6.72736	5.31086	5.37783	6.06781
Peak_1108	Chr1	6217587	6218419	5.36945	5.7503	7.29345	9.52727	7.53419	8.80502	7.54801	7.44737	7.44737	6.17654	8.52283	9.0359	7.2974	8.20315	8.24262	6.82577	7.47302	6.54161	5.65952	6.41728	6.4232	6.7646	8.84647	6.65606	6.44096	5.21355	5.95552
Peak_1109	Chr1	6220174	6221259	4.91472	4.32289	3.55246	4.95104	6.67354	6.02268	3.93692	4.55448	4.24569	5.34458	5.19473	5.78958	5.53227	7.41218	5.8804	6.88696	7.17909	7.02167	5.06305	5.48837	5.62006	6.85215	7.05195	7.10189	5.32642	4.08677	4.24418
Peak_1110	Chr1	6222082	6223509	10.1563	13.9791	16.1236	14.3958	12.2271	13.6073	11.0645	13.0329	13.3253	13.209	13.1699	14.1414	13.2516	10.9586	13.9411	11.8484	12.7578	12.5045	12.6173	10.6547	10.7502	12.4148	13.262	13.4749	8.98213	12.9155	11.1969
Peak_1111	Chr1	6224415	6225199	3.34202	2.92741	4.89577	3.60796	3.91996	3.63099	3.26245	4.37227	3.81317	3.3148	4.72825	3.88227	3.48023	4.0812	3.71894	3.62681	4.21941	4.19009	3.57445	3.36715	4.02257	3.73779	3.13681	4.13146	3.11587	3.09702	2.24267
Peak_1112	Chr1	6239064	6240118	2.10498	2.08629	1.74818	2.48049	2.2904	2.18133	3.07568	2.70173	2.51944	5.00304	2.94012	3.65217	3.25797	3.14735	3.01958	4.64	5.48137	4.64624	2.94012	3.4169	5.08561	2.7812	3.01959	2.54281	2.7812	1.98657	2.88091
Peak_1113	Chr1	6246809	6247833	4.66676	5.26012	6.77401	6.87024	7.0322	6.53506	8.23979	7.49568	8.60222	8.34242	7.63359	7.21342	8.13876	9.52114	8.76901	5.80699	6.56553	5.97056	7.4636	8.50921	7.15729	5.90962	6.43724	6.15018	4.253	5.78934	4.91853
Peak_1114	Chr1	6248675	6249709	4.44697	4.45491	5.2093	6.6101	6.39727	7.25808	7.55666	7.32638	8.29835	7.28984	9.76426	8.58581	6.50845	9.10833	7.37878	7.30414	8.06965	7.82031	6.05263	8.50799	6.54974	6.6371	6.71015	6.44651	4.66137	6.02564	4.99489
Peak_1115	Chr1	6254097	6254957	6.58661	6.06732	5.70649	6.91117	6.03486	6.74316	9.00361	10.1758	9.46562	7.97838	8.67332	9.15634	10.6436	8.8146	9.67372	8.24567	8.43277	8.8967	7.70919	7.84474	10.4717	8.10249	9.55918	7.82757	6.91307	7.94403	6.03677
Peak_1116	Chr1	6260775	6261567	4.86296	5.17389	5.77295	6.68087	7.31724	6.86328	5.37911	6.42176	6.88608	5.42885	6.34299	5.56152	4.96868	5.69211	5.21327	4.56447	4.51886	6.23728	5.7999	4.73859	4.34267	7.43747	7.32554	6.05486	4.85467	4.49814	4.78212
Peak_1117	Chr1	6267555	6268924	7.68861	8.62809	10.1531	11.0434	10.0115	9.51717	7.55663	9.13203	7.91778	6.49716	7.67541	8.28373	8.48171	9.2652	8.22494	9.73795	9.3624	10.4051	6.9351	5.25652	4.94816	7.12349	6.87872	6.73114	7.34305	7.48464	6.91711
Peak_1118	Chr1	6281115	6282304	8.94	8.31564	8.20513	9.25633	7.93024	8.67478	11.2192	12.2566	9.93456	10.9858	10.1473	11.4015	10.3711	11.0673	11.8947	10.3117	9.52293	9.13339	8.84606	10.1238	9.69697	9.50911	11.5438	9.90832	8.38332	8.73004	6.85694
Peak_1119	Chr1	6282318	6283127	1.17298	0.935539	0.941627	1.73105	1.5687	1.47738	2.73965	2.34595	1.72902	3.94306	1.7757	1.30894	3.43369	3.0684	3.23075	3.40122	3.07246	2.58136	2.86953	3.28352	4.04453	1.69655	1.55247	1.43679	1.44897	0.819865	1.65596
Peak_1120	Chr1	6293225	6293940	3.50797	3.68016	3.89826	3.75592	3.98091	3.85464	5.1311	5.24589	5.28262	3.18886	5.21834	4.22426	3.058	4.0383	3.58373	2.32105	3.27839	2.64016	5.60862	4.09799	3.23477	4.48598	4.75459	4.03601	3.058	3.86382	2.53915
Peak_1121	Chr1	6299601	6301113	5.43874	5.31923	6.48933	8.71002	7.1325	8.1255	9.40425	7.12707	8.72413	3.76778	4.07959	4.32078	6.81526	6.15361	6.44369	6.74138	6.31658	6.40893	2.88125	3.73845	4.38054	3.48531	4.37728	3.71238	5.8179	3.49074	4.70973
Peak_1122	Chr1	6304170	6304785	1.63578	1.88128	2.04139	2.58577	2.34827	2.56975	1.9053	2.78857	3.26623	2.33493	1.23818	2.19883	1.56107	1.6678	2.08943	1.75853	2.0921	1.71317	3.09011	1.63311	1.24618	2.60444	3.20219	3.47437	2.31358	2.74587	2.78857
Peak_1123	Chr1	6307190	6308055	0.677636	2.83582	4.71498	5.55965	3.09776	3.19457	8.88519	8.31575	9.05792	8.4657	0.95856	4.50238	4.54984	4.40938	3.92915	3.40526	2.42013	3.27809	1.8393	6.71182	9.63305	1.16546	0.580831	0.968051	1.8393	0.19361	1.06486
Peak_1124	Chr1	6310729	6311415	2.80425	4.51504	4.75909	4.65142	4.33797	4.62988	6.87424	5.08211	6.70914	3.25408	5.79274	3.92882	4.41933	4.88112	5.42187	5.17542	4.68492	6.02962	2.71333	4.48393	4.02692	4.15374	5.051	3.65366	3.345	2.44056	3.0507
Peak_1125	Chr1	6313296	6314043	3.79742	4.77754	5.9005	6.06971	4.60832	5.66975	7.48056	8.40574	7.48055	5.58404	5.57306	6.61691	6.65647	6.35539	4.81269	4.37098	6.60153	6.2587	4.57755	4.9006	5.43461	5.64118	7.7157	7.02346	4.91378	3.13814	3.66336
Peak_1126	Chr1	6318532	6319458	2.35131	4.12454	5.53604	4.97215	3.9951	4.30719	6.52728	7.64442	6.81099	6.05382	3.6174	4.20966	5.30375	5.79493	5.03598	5.13884	4.53416	5.30197	3.80004	6.17972	6.45812	2.98435	4.31428	4.80015	3.01627	3.59612	3.6174
Peak_1127	Chr1	6325844	6326708	2.8714	1.87563	1.25232	2.12077	2.32411	2.03526	1.7236	1.45376	1.91173	2.13217	2.44003	2.32601	1.25992	1.45375	1.74451	2.90751	2.81059	2.31651	3.56692	2.38682	2.56165	1.47846	1.94404	2.03526	2.42482	3.48901	4.29665
Peak_1128	Chr1	6327354	6328108	2.52773	1.74612	1.30197	1.7766	1.60242	1.66121	2.46242	1.88764	2.79988	3.54231	2.36009	2.46459	3.49441	3.86671	4.20635	2.78464	3.22008	3.77527	3.37466	4.20853	2.93922	2.75416	2.92834	2.22075	3.17872	2.22075	2.8173
Peak_1129	Chr1	6331443	6332196	2.81232	1.73317	1.5435	2.02094	3.64947	3.32464	1.64379	0.874217	1.82692	1.32985	2.26293	1.96644	0.967961	0.289952	1.35602	1.30587	0.778293	1.24919	3.61023	2.68151	1.21649	2.32398	2.23241	2.33706	1.55658	2.21497	1.84436
Peak_1130	Chr1	6344864	6346711	6.94608	6.36435	5.93561	7.21826	9.70795	7.71193	7.87827	7.45843	7.42462	7.88983	9.93122	8.73663	8.65035	9.63057	9.87251	8.53116	8.54183	7.98412	7.65144	7.35079	7.48333	7.81511	10.046	8.31679	6.03434	7.84802	7.66745
Peak_1131	Chr1	6347980	6348792	6.02723	6.4963	6.86226	8.65769	8.44337	9.07419	6.95931	8.24927	7.9379	6.654	7.95609	8.34227	7.42435	8.01675	6.16269	5.73001	7.12511	7.03817	5.08705	5.8776	5.68552	6.11821	8.54042	6.77128	5.47727	6.46395	7.53959
Peak_1132	Chr1	6352341	6353654	4.05443	4.95889	6.97422	8.00378	7.656	6.5076	8.55546	8.4216	8.09759	5.38797	4.6574	3.69414	4.9764	4.96014	4.83254	4.38719	3.74043	4.82754	3.3814	4.69243	5.56561	5.6144	6.08727	5.07148	3.828	5.0402	4.38969
Peak_1133	Chr1	6359246	6360269	3.43847	4.3326	4.58463	4.85592	6.55428	7.24776	9.13394	8.3586	8.17078	5.38565	8.91241	6.70036	7.72934	8.80325	7.92518	5.96676	6.04702	6.68431	7.53189	6.73889	6.00207	5.50926	6.50613	7.88826	3.60221	4.514	4.6665
Peak_1134	Chr1	6361458	6362329	6.21134	4.37338	4.04161	5.96628	7.39893	6.02471	6.62794	6.34141	7.21985	5.27068	8.02855	8.04363	5.09537	7.29148	7.24812	5.47992	5.6722	4.04161	6.55253	6.60908	4.51853	6.95783	6.44132	6.84095	3.64009	6.97856	5.66654
Peak_1135	Chr1	6362782	6364022	4.02934	3.01604	2.38952	3.83198	5.23734	4.46776	4.42671	4.45452	3.95383	5.14594	4.89825	5.40423	5.66518	6.80298	5.14197	4.67573	4.4479	5.13403	3.43725	3.86641	3.59885	4.20683	3.83727	3.9247	3.19883	3.51275	3.52865
Peak_1136	Chr1	6366993	6367686	4.00999	4.2279	4.83189	5.02374	6.11802	4.79635	7.15309	5.43587	6.27671	6.68411	6.31698	4.50976	5.17296	6.29803	4.80109	5.57088	3.24731	3.83709	4.80346	5.31033	4.78688	6.05407	6.40225	6.04696	4.3487	5.79826	5.48561
Peak_1137	Chr1	6369151	6370240	7.30355	6.93257	6.27807	8.2295	9.26855	8.75279	7.49357	8.20688	7.16631	9.2972	9.45706	8.84177	7.62778	7.93995	8.69096	7.15274	7.10147	6.9009	8.73771	7.82081	8.76938	7.66247	8.88702	8.18577	7.53729	8.27324	7.99876
Peak_1138	Chr1	6377843	6378716	9.12735	7.32746	9.338	8.6045	8.67032	8.73427	7.5776	7.50049	8.06472	7.06415	10.2295	8.82454	7.9105	9.07469	7.91802	6.76511	9.46777	7.5682	8.48037	6.61841	6.00904	8.99758	9.40007	9.35681	7.0792	8.45216	7.24658
Peak_1139	Chr1	6381761	6382369	1.65189	1.53852	1.67618	2.02977	1.96229	2.85841	2.79363	3.02576	2.69646	1.07966	1.70047	2.2592	1.37657	1.52233	1.46024	1.71667	1.31449	2.23491	1.68428	2.78283	2.66407	3.28758	3.45763	2.16473	1.72476	2.5777	1.97309
Peak_1140	Chr1	6383777	6384413	2.58052	1.43993	1.57153	3.73659	2.55471	2.60632	2.83083	1.77023	2.9934	2.21924	2.23731	1.907	2.21666	2.26827	1.31606	2.53923	3.16113	2.01022	1.84249	1.83991	2.43084	2.6089	1.44767	2.35085	1.98184	2.23731	2.36891
Peak_1141	Chr1	6385209	6386070	3.03777	1.60374	1.50077	2.43136	2.71168	2.69261	4.21054	4.79788	4.85699	3.95882	3.01488	2.86233	4.79597	4.86271	3.67469	4.94662	3.8978	4.08468	3.53357	4.02747	3.82724	3.9512	2.95768	3.01488	3.11214	3.28758	2.91763
Peak_1142	Chr1	6389578	6390524	2.74428	1.65941	1.74099	2.8328	1.50666	1.96491	1.68198	2.44746	1.65767	2.92133	1.43897	1.89548	2.48912	1.85903	2.07253	2.9248	2.73213	3.16434	2.57764	2.48738	1.86423	1.96838	1.69413	2.93348	2.61583	2.38844	2.16626
Peak_1143	Chr1	6395789	6396724	5.73219	6.09045	6.85966	6.18528	10.7303	9.09001	8.76161	8.3331	7.52349	7.99415	9.69238	8.39104	9.36046	8.7054	8.3085	7.70263	8.28919	7.47783	7.61481	6.87721	7.56037	9.69063	9.23226	9.22524	6.35914	6.18001	6.44871
Peak_1144	Chr1	6398637	6399467	1.76643	2.1937	1.74863	3.16691	2.52206	2.86031	2.46865	2.01567	2.7713	3.67528	2.41524	2.92163	3.05812	2.05523	3.33703	3.38648	4.47839	3.45572	3.8355	2.9157	3.08185	2.59723	2.08292	1.72489	2.15216	2.64866	3.3845
Peak_1145	Chr1	6400342	6401372	6.56718	6.54008	6.53051	5.91987	8.56492	7.00563	7.27508	7.1555	7.29102	6.23396	8.29228	7.05665	7.84108	7.97978	5.62013	6.37745	7.50945	6.60864	8.22372	9.09424	7.39944	8.97627	8.93003	8.13923	6.01712	6.75532	6.50181
Peak_1146	Chr1	6405550	6406547	6.70363	4.82925	4.13088	7.29987	6.76621	6.40056	6.04809	5.51279	6.55209	4.70571	7.11869	6.2095	6.1288	6.94904	5.69396	5.06643	5.1949	5.37608	5.69232	4.64642	5.79608	7.00504	6.47304	7.26858	5.99044	6.69869	6.22762
Peak_1147	Chr1	6409718	6411095	3.77189	4.72738	4.9099	4.28602	4.56276	5.75206	5.51826	6.20656	5.56836	4.66416	4.73335	4.38145	3.40687	4.68444	3.9544	3.14324	3.45935	3.26491	4.20251	5.09598	4.80611	4.25858	4.94091	4.44467	3.67526	4.33373	3.14204
Peak_1148	Chr1	6414634	6415208	1.42081	3.63063	3.02743	2.68724	2.94738	2.86162	4.83131	2.62434	2.69295	2.78729	3.06745	2.97597	5.18008	4.96853	3.67351	3.66208	4.19666	2.80731	2.63006	2.5786	3.00742	3.80216	4.27671	4.13091	2.25556	1.761	1.37792
Peak_1149	Chr1	6417991	6418775	2.24895	2.88344	2.9672	4.74291	3.4174	3.84458	3.60168	5.23081	4.12936	3.83201	4.39949	3.93671	3.59958	4.09167	3.91996	3.53048	2.80596	3.31061	3.83411	3.60377	3.24988	3.05724	4.10214	3.92206	2.55468	4.75756	4.48534
Peak_1150	Chr1	6419647	6420631	4.44741	4.94138	6.40494	5.92932	5.42867	5.17501	4.53586	6.03946	5.44202	6.05281	4.13367	4.49246	4.27719	5.81417	6.30647	5.51879	4.83791	5.69902	4.43739	5.90429	5.58888	5.69068	5.95435	5.43535	3.61967	4.59927	4.52417
Peak_1151	Chr1	6421013	6422000	5.00291	4.87147	6.03111	6.10265	8.1058	6.96946	8.78628	8.60826	8.61658	5.52366	6.5685	7.33881	6.08268	7.51018	7.234	6.85134	8.48515	7.65826	5.68837	6.54354	5.9396	7.60336	8.99093	6.95782	5.26079	4.45221	5.51534
Peak_1152	Chr1	6429994	6430964	4.63003	4.78578	5.05833	5.40368	6.25012	5.96064	5.69824	9.06539	7.12364	5.52556	5.20053	6.18748	5.74903	7.57564	6.90696	6.54976	4.48106	5.98095	5.13959	4.48952	6.44649	7.33018	6.44142	6.22304	5.93863	5.9234	6.22472
Peak_1153	Chr1	6432732	6434098	5.21275	5.02877	5.27167	5.53742	6.37794	5.40273	5.21275	6.17353	6.80723	4.93377	6.26491	6.22884	4.62714	6.13264	6.12061	4.83517	3.87439	5.00712	4.76783	5.44121	6.21802	5.82721	6.57275	7.10545	4.42512	5.39673	4.29285
Peak_1154	Chr1	6437393	6438207	4.4352	5.14314	6.58322	6.66793	6.10319	7.36982	7.41218	6.76878	7.34561	6.93416	8.68081	8.53559	7.94263	8.1907	8.29356	6.61146	5.14314	6.33313	7.59571	6.36741	5.63728	7.83775	8.38837	5.87528	4.61471	4.35654	5.32063
Peak_1155	Chr1	6452289	6452852	0.784006	1.39023	0.778177	0.912245	0.743202	0.743202	1.09877	0.612049	0.888928	0.32934	2.08097	0.445921	2.33162	2.47734	3.614	1.68168	1.32902	2.02268	0.297281	1.32028	0.836466	0.445921	0.891843	0.594562	0.929731	1.21827	0.953047
Peak_1156	Chr1	6458762	6459903	6.53485	7.17107	7.97137	4.95296	8.13401	6.86735	6.48591	7.69501	5.79932	5.69712	6.98394	7.36538	5.79644	8.25636	7.63023	6.97099	6.06561	6.42258	5.57909	6.34053	4.91841	6.98538	6.44993	7.45175	5.38045	5.29985	4.71689
Peak_1157	Chr1	6460505	6461322	3.62116	4.3687	5.39356	5.35136	6.61735	6.94289	6.76405	6.20942	7.20011	4.09942	5.43776	5.57642	5.39155	7.46135	6.14913	5.54427	5.5503	5.16447	4.02909	3.89445	3.71761	6.35411	6.26569	6.96902	3.72364	3.72967	4.65405
Peak_1158	Chr1	6463941	6466498	5.6845	5.66265	6.81356	7.12973	7.33793	7.42018	9.48681	9.92378	9.46303	4.66854	5.71085	5.52192	7.25503	9.16293	7.08088	6.64906	7.10017	6.52632	5.34456	5.29958	4.99627	5.37605	5.48786	5.60161	5.04832	4.34145	5.65365
Peak_1159	Chr1	6466539	6467589	4.81876	6.20292	6.98962	6.79412	6.034	5.2864	6.49852	6.26079	7.01933	5.39901	5.3646	4.9079	4.89852	6.53761	5.41308	5.51475	5.69305	4.33547	5.86821	5.48816	5.10028	6.29832	6.47193	5.46001	4.62325	4.19628	3.90849
Peak_1160	Chr1	6474695	6475462	4.93565	5.59702	5.19677	5.17109	5.18821	4.99343	5.69761	5.6227	4.74301	4.21007	5.13898	3.8034	6.69073	4.92922	4.99343	3.13989	2.36081	4.62744	4.31066	4.31922	4.43908	5.44933	4.78368	4.36631	4.64884	3.05642	3.70708
Peak_1161	Chr1	6483086	6483700	2.46969	3.37578	4.05735	3.95578	5.53542	3.84887	3.5415	4.39413	3.25016	2.18103	2.58997	3.36241	2.57393	3.71523	3.98786	1.49946	2.56859	1.63577	3.75799	4.27652	3.60564	3.18066	3.34103	2.97486	3.47735	2.8626	3.61366
Peak_1162	Chr1	6485790	6487000	2.28447	1.86911	2.00757	3.60928	2.30483	2.33469	1.59221	2.3537	1.4429	4.40606	1.9682	2.61431	1.10491	1.66143	2.31298	3.45318	3.27265	2.36456	2.77856	3.59977	3.62692	2.02793	2.22475	2.47586	3.48983	2.34013	3.15727
Peak_1163	Chr1	6503705	6504142	0.5742	1.99281	2.45818	2.83347	1.5312	0.934482	0.8294	1.4036	0.840659	1.7226	2.81471	2.2968	1.7226	2.13542	2.73214	2.4882	3.17874	2.00782	2.68711	1.914	2.64207	2.28179	1.7226	3.53152	2.88226	1.71509	2.871
Peak_1164	Chr1	6505844	6506488	3.63418	3.29777	3.12702	3.6724	4.77845	3.76415	4.12604	3.17035	5.02566	3.66475	4.54909	4.36305	3.5093	4.44205	3.97567	4.77336	2.59948	4.74787	4.22798	3.37677	4.18975	3.92216	4.75297	3.52204	3.82021	2.92824	3.61633
Peak_1165	Chr1	6524840	6526019	7.63805	7.78849	8.81377	6.13356	9.53676	8.70929	6.92342	7.53218	7.22291	5.61256	8.3666	8.55466	6.79386	8.19665	8.17993	7.89158	7.31765	7.43606	8.68421	6.79943	7.59486	7.6464	8.19387	7.43048	6.5849	7.30929	7.74391
Peak_1166	Chr1	6528916	6529625	4.13262	4.6767	4.52852	5.8968	7.57763	5.28327	8.12171	5.91069	8.27219	4.42897	3.71126	2.62543	4.52621	5.26012	4.35256	2.95187	3.33157	4.1905	4.36877	5.66065	4.55399	5.18835	5.6213	6.47792	3.19265	4.71142	3.97287
Peak_1167	Chr1	6537419	6538223	2.96495	2.65252	3.38763	4.77413	3.51219	3.85524	2.70766	5.39898	5.08043	4.67816	4.41474	4.6169	5.02326	3.54078	3.92467	3.57141	4.40862	3.76132	2.58105	5.6726	4.81701	4.427	5.45003	4.56381	3.95734	3.73681	4.67816
Peak_1168	Chr1	6543747	6544367	1.54585	1.70732	1.34997	3.94139	2.90641	3.12611	2.09643	3.54963	2.54112	3.10493	2.70259	2.58877	3.05729	3.10493	2.58612	2.76347	3.91492	3.21876	2.89582	3.50992	3.94403	1.85555	1.34997	2.42995	2.83494	2.15995	1.75496
Peak_1169	Chr1	6546203	6547337	8.27253	8.48398	8.98074	7.68164	8.30728	7.15301	9.92646	8.38694	9.7179	10.1538	13.3806	11.9019	9.83522	10.9779	11.4529	10.2668	9.33701	11.6485	11.1792	9.81783	9.82652	10.6535	10.2176	12.1452	7.60922	8.98653	8.57232
Peak_1170	Chr1	6561219	6562875	8.04435	9.97979	14.3417	10.9847	10.7228	12.0253	12.5134	11.1801	11.5353	12.2466	11.6265	12.3815	9.49469	12.4995	11.95	11.4857	11.193	10.6663	8.6098	9.00661	10.0234	10.7437	12.2694	11.0165	8.03839	9.73476	8.40346
Peak_1171	Chr1	6565497	6566400	3.71125	4.55133	5.08411	5.67689	5.6787	5.91145	5.80236	5.87327	5.68052	4.91863	4.88954	4.74953	5.07138	4.33131	4.35858	4.6477	4.30767	3.68762	5.48414	4.05674	3.34758	5.65689	4.90409	4.53133	4.89681	4.59497	4.82226
Peak_1172	Chr1	6568094	6569430	3.23717	3.67609	4.38917	3.14496	4.56621	4.41868	4.80965	5.23258	4.97439	3.13881	2.8462	3.20643	3.8101	4.3277	3.88755	2.7626	3.58388	2.78473	3.35274	3.96378	3.95025	3.19783	2.86096	2.68022	3.72035	3.42897	3.52732
Peak_1173	Chr1	6577609	6579301	6.55088	6.44214	7.19461	7.39851	8.63158	9.09084	5.64792	5.79647	5.46052	4.84689	7.49657	6.11299	3.49633	3.16912	3.59633	4.54299	4.71776	4.06044	6.80041	4.99544	4.53037	7.92281	7.96456	7.74027	6.73438	8.81413	6.99945
Peak_1174	Chr1	6584109	6584858	5.34341	5.04095	6.43269	6.63872	7.16253	6.23982	5.38505	6.54009	5.97243	4.58726	6.53789	5.99873	4.43604	5.70066	6.18064	4.74945	5.46615	5.293	5.79271	6.05133	5.74449	6.09736	5.92202	6.5642	6.14777	5.02999	4.18618
Peak_1175	Chr1	6594802	6595686	4.07511	4.18098	4.54689	5.33999	7.97005	6.11452	6.63088	6.32998	8.00534	7.07665	7.32925	7.25495	7.08408	5.93435	7.29396	6.55101	4.94808	7.14537	6.88905	5.16911	5.65389	7.05065	7.92733	6.0588	4.69548	5.9715	5.26198
Peak_1176	Chr1	6602000	6603047	5.54465	7.80016	11.2712	10.2454	13.1989	9.61961	11.3465	11.5991	11.4218	9.49727	11.8328	10.8838	11.1066	10.7129	11.1081	10.3223	10.3631	10.785	9.99919	9.73882	10.2141	10.8289	12.2014	9.90351	9.27924	9.5506	8.15934
Peak_1177	Chr1	6608018	6608754	6.04879	7.08368	6.71121	6.34097	6.94539	5.91496	5.11872	6.85172	7.32456	5.34621	6.82049	5.89043	6.06886	5.8369	6.44133	4.02806	5.45997	5.4622	5.01166	6.02871	3.84071	4.84661	6.05548	5.21686	4.87783	5.44658	5.16555
Peak_1178	Chr1	6609956	6610714	3.98494	4.11705	4.79709	3.36771	3.83767	5.69587	5.85613	4.69097	6.29144	4.36394	5.10462	4.76027	4.98334	5.40782	4.54803	3.3179	4.33796	3.94163	4.42458	3.94163	3.59294	4.71913	5.53561	5.07431	3.97628	4.29464	3.89398
Peak_1179	Chr1	6611723	6613865	6.80681	8.01951	10.0215	8.52807	10.461	9.36875	7.4005	8.25423	7.52169	8.74974	8.25269	8.70448	7.88988	8.97218	8.22277	9.07574	8.83719	8.8579	6.10955	7.31535	6.35654	8.73747	8.6554	6.63499	6.53296	8.0034	6.79069
Peak_1180	Chr1	6616520	6617558	7.50384	9.10175	7.73957	9.33906	12.1931	11.891	13.0981	11.2977	11.4591	7.59243	9.61117	9.54789	8.93405	11.2012	7.28709	8.94512	7.96106	8.63345	9.75831	8.63345	7.76172	11.179	11.6252	10.0874	7.91992	8.52903	8.53536
Peak_1181	Chr1	6622120	6623571	3.80268	4.55325	5.48496	6.72799	6.4359	5.76911	4.9959	5.11024	5.61061	3.55248	3.92607	3.40644	3.97475	3.30569	4.40834	2.98984	3.36682	3.18909	3.92947	2.89135	3.0272	3.09059	2.42946	2.88116	3.80607	2.90493	3.46418
Peak_1182	Chr1	6623890	6624670	2.46884	2.08157	0.578799	4.00529	1.19338	2.06052	3.00554	2.39307	2.7172	2.66879	2.03948	2.57618	2.61617	2.24363	1.7385	2.72351	3.50647	3.05395	3.35703	2.58039	4.49148	1.94055	1.52803	1.61011	4.10421	2.4499	3.00554
Peak_1183	Chr1	6625450	6625993	2.29043	1.66192	1.2268	1.18752	2.82526	2.77389	4.52344	3.35708	3.65924	2.38712	1.97315	1.48666	2.61979	2.71044	2.77389	3.61694	2.30553	3.15462	2.31158	2.42338	3.03073	3.03678	2.00337	2.77994	4.09436	3.03074	4.09436
Peak_1184	Chr1	6626938	6627603	1.09092	3.57882	3.6578	4.68455	4.17117	2.77173	3.61337	2.39164	4.28718	2.09299	0.858916	1.67094	2.76927	3.8281	3.14689	3.45541	3.79602	3.80342	2.64339	1.76226	1.92022	1.76226	1.88814	2.26576	3.82563	1.51051	2.30278
Peak_1185	Chr1	6632050	6633131	2.78928	3.0992	2.62216	3.8193	4.80679	4.05326	4.61689	4.69437	4.26139	1.4706	2.21045	2.41859	2.47936	2.99741	4.1201	2.34111	2.39124	2.09196	3.27542	3.29365	3.5033	2.84245	3.22073	3.64611	2.73002	2.3563	2.67381
Peak_1186	Chr1	6649810	6650535	5.49515	5.49967	3.85136	4.63476	5.51552	5.38193	6.05213	6.49365	5.92081	6.33515	6.27402	5.54495	5.80534	5.86647	6.48006	4.94948	5.07175	6.63629	5.94118	5.76458	4.68457	6.18572	5.84383	4.78193	4.96533	4.84986	5.51778
Peak_1187	Chr1	6662468	6663440	3.94476	3.95996	3.58322	3.68966	5.71187	5.72876	6.32681	7.44858	6.08016	4.99725	5.65612	5.58178	6.25586	6.00244	6.11732	5.84027	4.98205	5.41285	5.76593	5.24221	6.09705	5.42636	5.17464	5.21519	3.23858	3.443	4.23533
Peak_1188	Chr1	6666029	6666808	7.6963	8.05878	8.8891	6.68896	8.34538	7.64361	6.73743	6.09045	6.31172	7.64151	7.25163	7.81431	7.3823	9.70678	9.23682	7.72792	5.91132	7.12098	7.74688	7.12097	6.7037	7.18209	5.80173	6.88284	7.34014	8.02928	7.04932
Peak_1189	Chr1	6671326	6672612	7.07966	7.31595	8.01203	7.88048	8.72855	8.01458	6.57643	7.65569	7.64291	8.01458	8.51653	7.96477	8.36327	10.2152	9.72095	12.7199	12.9804	12.5934	8.39264	8.65575	8.27258	7.81662	9.13088	8.33006	9.03509	7.32233	8.69151
Peak_1190	Chr1	6677040	6677765	2.43625	1.95398	2.28908	2.56984	2.90493	2.28681	3.23324	3.11776	3.12456	3.38267	4.18419	2.98644	4.0823	3.97136	4.84985	3.71324	2.92531	4.2657	3.12229	3.5955	3.00229	3.86947	4.04155	3.72003	1.86568	3.46418	2.04455
Peak_1191	Chr1	6682443	6683542	3.16654	5.26311	6.08949	6.61401	7.67051	6.74401	5.63969	6.29571	6.1657	5.03148	4.47559	3.88681	5.36772	6.02075	5.26012	5.95201	5.25863	6.76344	4.10648	4.7625	5.44393	6.38388	4.92091	6.38388	3.65817	2.88261	3.39069
Peak_1192	Chr1	6684703	6685406	3.69152	3.55843	3.45336	5.00141	2.85795	4.61615	6.7853	5.89569	6.46541	5.5758	4.35931	2.91399	5.0738	5.00141	3.69152	4.66752	5.63418	5.72991	2.41431	3.45336	3.51873	3.57244	3.95537	4.64417	3.80593	4.03709	3.12413
Peak_1193	Chr1	6688590	6690077	7.71852	9.23968	9.9721	8.15819	11.2094	11.0171	8.5603	10.4339	8.25098	7.98806	9.37997	8.91821	8.86851	10.2748	9.69039	9.23527	9.48714	8.97345	7.38047	7.99137	7.15512	9.87268	12.9835	12.1506	8.16481	9.29602	7.75939
Peak_1194	Chr1	6691684	6692546	6.50849	6.41897	5.63422	5.79802	7.61133	8.01323	8.55989	8.35418	8.00561	6.61706	8.68941	5.37898	6.76944	8.18275	6.36182	5.43231	6.32373	5.37898	6.72943	5.95992	6.45896	7.41515	7.89704	8.15609	5.74278	6.4323	7.52752
Peak_1195	Chr1	6693911	6695069	5.49159	5.20793	3.25496	3.32729	7.81189	5.27459	6.43758	5.15262	5.55541	7.92819	7.93528	7.64737	10.4754	9.90669	9.34222	6.65458	7.5949	6.16811	8.98623	7.60624	7.94805	7.74098	8.5565	8.0913	7.45023	6.65458	7.5098
Peak_1196	Chr1	6697078	6697518	2.73592	3.22794	3.32858	2.69865	2.71355	2.46755	2.67255	3.16457	3.95105	1.94944	1.69597	2.68746	2.66137	1.56178	2.393	1.87489	1.52078	0.760392	1.75561	2.08735	2.29608	1.14059	1.76679	1.99417	3.0863	2.37809	2.97075
Peak_1197	Chr1	6698015	6698776	6.05311	5.69502	4.56896	5.7813	5.9021	6.27099	5.37791	4.37481	5.19023	2.83241	2.97047	3.86786	2.95321	3.28758	3.0244	3.41054	4.46973	3.25953	3.77295	3.1905	2.6814	3.51193	3.36092	3.49251	5.38653	3.52056	3.63057
Peak_1198	Chr1	6709728	6710656	2.64351	1.70395	1.34299	2.99209	2.3144	2.88946	3.49991	3.45744	3.3902	3.4539	4.45539	3.56891	3.60961	4.15105	3.61492	3.24865	4.14044	4.00065	1.87735	2.79745	3.96703	4.77035	4.04843	4.25545	2.96377	2.53381	2.10914
Peak_1199	Chr1	6712842	6714389	4.92818	6.56241	6.82364	6.76205	5.54725	5.82122	7.33228	7.1422	7.05724	5.77874	5.95714	6.69727	5.96139	6.33623	6.06545	6.28208	4.76571	6.99885	5.00994	5.46655	6.59639	6.0336	6.39782	6.46791	4.81987	4.38662	6.18119
Peak_1200	Chr1	6726889	6727952	6.01744	4.26242	4.25778	6.86251	5.8305	7.00464	7.96249	8.01347	8.00265	5.30369	6.77753	5.5895	5.92166	6.84551	5.90929	7.28736	5.98191	6.86405	7.01236	6.92276	6.13331	6.04062	6.95675	6.48555	5.35776	6.43457	5.28515
Peak_1201	Chr1	6728724	6729996	7.05293	8.41005	7.46613	6.46669	7.88837	7.88966	5.99279	6.18907	6.30269	7.11232	7.869	8.25897	6.3027	7.64174	6.98061	5.20253	8.53531	6.75335	6.89539	6.01216	6.2278	8.2848	7.11878	7.90904	6.90701	8.24994	6.51963
Peak_1202	Chr1	6733188	6734964	4.24592	5.94428	7.40954	5.47066	8.63058	7.80267	6.54	6.00071	6.45582	3.71309	2.83061	3.8352	2.37087	2.6419	2.16828	3.12385	1.8399	2.32739	2.75291	3.63261	3.31995	4.36987	4.91102	4.62333	5.30508	6.33742	4.62795
Peak_1203	Chr1	6744288	6745526	10.55	9.47534	8.91016	8.82525	10.4823	10.3496	9.51646	10.6641	8.9871	9.49523	12.735	12.6422	11.2001	12.0942	11.7321	12.5029	11.1311	10.201	9.20203	9.92243	9.81099	11.8276	13.8853	12.3185	8.11944	9.87998	9.26969
Peak_1204	Chr1	6746707	6747364	5.12872	6.31785	4.81645	6.55267	5.2886	5.32357	5.04129	6.62512	5.33107	6.49271	4.8764	5.05877	6.14797	5.86817	4.35429	5.62336	6.93239	6.26538	5.74826	5.38103	6.53018	6.23541	5.71079	4.37178	3.66979	4.32681	4.21439
Peak_1205	Chr1	6753264	6754125	5.70368	7.29217	9.79408	9.80553	6.26241	6.59041	6.62092	6.98134	6.32153	5.64075	4.18193	4.88941	3.89208	3.89017	3.98933	2.80703	3.96645	2.90428	4.56332	3.96454	6.74106	3.68994	3.34669	3.95501	3.59269	4.16859	6.6171
Peak_1206	Chr1	6759792	6760907	5.09339	6.33507	6.6164	7.46775	8.86114	6.95664	7.13634	6.81819	7.43534	6.26142	7.00672	6.59872	7.25859	7.28658	6.37925	7.5738	8.1453	6.21429	7.85218	6.51623	6.65322	7.94056	8.69765	8.37508	5.00354	5.48372	6.77694
Peak_1207	Chr1	6773439	6774630	2.56773	4.71762	5.18097	5.66087	5.47883	4.98101	5.21269	7.21226	6.33796	4.54386	4.98652	5.43608	4.54524	4.61695	5.83738	4.59213	5.07616	4.45423	4.66521	5.79049	5.71051	3.88607	4.15084	4.15084	2.78148	2.67254	2.78148
Peak_1208	Chr1	6774701	6775547	7.47371	7.09333	7.93948	6.92837	7.11273	9.03404	7.94724	9.57745	7.2544	6.69159	8.97582	7.42907	7.82692	7.36502	7.94142	6.38108	6.17731	5.50776	7.73764	6.50529	5.89784	8.55663	9.56774	8.61679	5.34474	8.11609	5.24576
Peak_1209	Chr1	6778872	6779649	3.2749	5.3476	5.45535	4.58486	6.14202	6.16737	7.65059	8.15556	7.73932	5.60325	5.70889	6.35753	6.08075	7.40761	6.14202	5.86524	6.16315	5.87369	5.49338	5.29266	6.95124	7.00406	5.65818	5.2821	5.2166	4.41795	5.85045
Peak_1210	Chr1	6798960	6799780	2.10829	3.77811	5.07152	5.34782	4.54695	4.595	6.53111	5.31579	7.23387	6.18673	3.60192	5.0555	5.89041	4.43482	5.28975	4.4989	3.74207	4.6871	3.3076	4.09045	5.0535	4.28867	3.24153	4.2266	2.80505	3.10538	4.38677
Peak_1211	Chr1	6801855	6802674	2.76036	2.26322	1.86229	2.52582	3.28357	2.32736	4.59459	5.06568	4.54848	3.66043	3.88495	3.38981	3.92705	4.10746	3.24347	2.76036	4.26583	3.65041	2.59598	4.00523	5.24809	3.47601	2.79645	3.43191	2.74633	2.52983	2.75635
Peak_1212	Chr1	6803648	6805079	2.864	3.77429	3.48157	4.21852	4.33446	4.38496	4.8051	5.2964	3.52634	5.79458	3.65835	4.84527	4.37349	4.22541	5.06452	5.82328	7.62433	5.43185	5.41807	6.79325	6.21701	3.96943	3.23133	3.87989	4.08422	3.39778	3.80528
Peak_1213	Chr1	6805373	6806211	5.43489	4.7374	5.0019	5.06655	5.92861	6.4047	6.46936	6.69467	6.25776	6.28127	4.9392	4.71585	5.26443	6.69466	6.16176	4.10457	4.92549	4.95096	5.42705	6.49482	5.60534	5.42705	8.08768	5.68371	5.37415	4.67667	4.9823
Peak_1214	Chr1	6808930	6809684	3.5336	4.39142	2.53644	3.7535	4.95096	5.17739	3.15259	4.99015	3.42692	6.44452	4.97055	5.35592	4.76372	4.90524	5.65202	5.70863	4.3174	4.70058	5.9786	4.7746	3.93856	5.11207	6.81683	5.04676	6.44016	3.76221	4.55253
Peak_1215	Chr1	6811249	6812759	4.49404	6.28252	6.91457	7.6935	6.33255	6.49356	7.23115	6.49792	6.94721	5.13371	5.56777	4.4973	4.88241	4.95203	5.02275	5.75816	4.54952	5.5482	4.68006	4.69203	5.75054	5.47857	5.10434	4.85848	3.21795	4.21663	3.71729
Peak_1216	Chr1	6814738	6815497	5.37043	3.62282	4.26953	5.14117	7.53979	5.70351	4.63289	3.86074	3.23567	3.96672	5.18442	5.91115	4.68696	6.67464	6.72655	6.59246	6.28533	6.45836	4.19166	4.37983	4.69994	5.66891	6.00199	4.40362	3.24216	3.86074	4.19166
Peak_1217	Chr1	6821789	6822871	7.74387	9.43623	11.2212	10.3864	10.8888	12.0544	11.5278	10.8098	10.8812	9.38462	11.4883	9.82023	9.54096	10.3727	9.92192	9.15695	10.9131	8.95357	6.33837	7.49191	8.6925	10.1192	11.1954	8.6667	5.64018	7.67102	5.25314
Peak_1218	Chr1	6823669	6825675	9.80131	10.2755	11.4869	8.76278	11.4639	12.111	12.5238	12.0708	12.432	11.4983	12.7621	13.6728	12.2076	14.2388	12.9071	10.1502	12.1953	11.6277	8.73001	9.63258	11.364	13.2551	12.8538	13.876	9.39834	10.9938	10.6736
Peak_1219	Chr1	6832268	6834062	8.27572	11.0248	13.4553	11.969	14.4397	13.0926	12.7263	12.5294	12.4259	10.0413	8.827	9.164	9.58251	9.9598	8.7803	8.16034	8.97353	8.82701	7.38193	6.9964	8.20887	6.6301	8.18872	7.93964	7.18505	7.77846	6.30409
Peak_1220	Chr1	6846281	6846936	4.09945	3.52563	3.72609	4.35003	4.30743	5.13934	5.00153	5.50268	5.77831	4.27234	5.05415	5.63799	4.91884	5.70314	4.50789	4.13954	4.39263	3.4254	2.68368	4.51039	3.10967	4.84868	6.07901	5.36737	4.6006	3.96163	4.08942
Peak_1221	Chr1	6858996	6860382	5.83089	7.83496	9.90184	7.32061	8.98098	9.29149	8.79848	8.56145	8.7167	6.25042	7.19261	7.04921	6.81455	7.35971	7.85747	7.17247	6.34642	6.57634	7.2175	5.50734	5.98495	7.49482	9.03077	8.82337	5.19683	5.82852	4.89581
Peak_1222	Chr1	6872433	6873381	2.2968	2.61032	2.77487	3.71368	1.623	3.40016	2.7714	2.20846	1.67843	3.68077	1.85511	2.56181	1.49309	2.27428	1.66284	4.54164	3.26852	4.79973	4.02026	4.48967	3.74832	1.99541	2.03179	2.56182	2.38514	1.95038	2.89438
Peak_1223	Chr1	6893996	6894807	5.56297	5.63382	6.21482	6.62577	8.76147	5.93343	8.57321	8.89104	8.87888	7.38895	8.01448	7.3687	5.67836	7.49826	7.31607	6.72901	6.60755	7.05493	5.53058	6.32818	6.74925	8.01043	8.00436	7.82824	3.23899	5.94355	4.74917
Peak_1224	Chr1	6897925	6898803	6.09268	6.39002	5.79721	6.36945	8.81175	6.07958	6.11325	8.01137	7.10251	5.64386	7.84119	6.79395	6.44051	7.65044	6.89867	6.15065	5.08097	4.9482	6.48913	6.74159	5.88136	8.23204	10.0741	8.16658	5.12211	5.53166	5.3914
Peak_1225	Chr1	6903254	6904162	7.46667	7.47029	8.5987	7.66921	9.03812	8.87537	7.2786	7.93142	7.78494	11.5391	6.92959	8.29489	6.61494	7.13212	7.45401	6.24061	6.81024	6.24242	8.52636	8.76144	8.20809	7.50826	9.17737	7.77409	6.1737	6.05797	6.08147
Peak_1226	Chr1	6913122	6914142	9.13985	7.16924	8.37511	7.71824	7.02112	10.5566	7.4542	8.04668	7.21109	9.00461	10.9446	9.65504	9.29763	9.58098	7.90338	8.84845	7.31414	8.63271	7.99193	9.94806	9.40549	9.91264	13.0199	12.0845	7.99676	8.04668	8.04023
Peak_1227	Chr1	6915706	6916883	9.08828	9.43016	11.0084	9.86134	12.6787	11.5763	10.3009	7.97056	9.7176	6.70492	11.7354	8.76175	8.84688	9.63667	9.68132	11.7996	10.9539	9.37155	9.27526	6.82493	7.23378	11.1088	10.6749	9.52784	8.13382	10.1976	8.32639
Peak_1228	Chr1	6924070	6924834	4.05038	4.57038	4.15567	5.49649	6.60953	7.13168	7.42606	3.64427	4.83682	5.46425	4.79384	5.49648	5.35897	6.80936	5.30954	4.56608	4.15137	4.95285	4.48013	4.99583	4.55963	6.53003	5.88326	5.37401	2.817	5.12905	3.88493
Peak_1229	Chr1	6927912	6928659	2.45689	1.71851	1.21966	1.65478	1.68115	2.07451	2.12945	2.39976	1.56907	4.82808	3.12935	3.56008	3.12935	3.92487	3.33372	5.13354	4.75776	4.79731	3.90949	3.88751	4.09409	3.05463	2.57776	2.68984	3.13814	2.19538	2.98211
Peak_1230	Chr1	6932123	6932807	2.69245	4.28345	4.39144	5.94644	4.58581	4.6818	6.05202	5.36331	7.41744	3.57074	3.79391	3.61873	6.18641	4.48262	4.00508	4.74179	5.34651	5.19533	3.99068	4.02428	5.48329	2.3517	2.75725	2.66846	3.8419	3.36677	2.69245
Peak_1231	Chr1	6932958	6933806	2.56733	3.6961	3.25854	5.58191	5.72131	4.30405	6.13952	5.43089	5.86846	6.59451	4.88877	6.22084	3.83551	5.70389	5.55674	4.42022	4.34471	5.83942	4.71839	5.69033	4.20918	3.96329	5.43089	4.45701	3.45602	3.94974	3.45602
Peak_1232	Chr1	6935186	6935955	3.47544	3.81914	3.77858	3.60993	4.28666	5.77034	3.83835	5.27507	5.79168	3.99206	4.85665	3.2214	4.42756	4.81182	4.6453	3.3751	3.8106	3.8106	2.8414	3.93869	3.10398	3.74229	4.64104	4.57272	1.89356	4.35497	2.3931
Peak_1233	Chr1	6939760	6940706	3.80658	3.25633	2.77552	3.67813	5.84265	4.98517	8.67372	7.02993	8.00717	9.01393	7.6253	9.00351	9.97209	10.9563	9.9877	7.33717	6.88239	6.51787	6.81469	9.20313	10.137	6.19675	6.68798	6.68277	4.9574	4.33773	3.48372
Peak_1234	Chr1	6941105	6941670	3.12204	4.14142	4.44346	5.55577	3.11042	3.28758	3.23821	2.93326	3.71159	3.32243	3.71159	3.48216	4.06591	4.84714	3.79581	2.97392	2.99425	3.04653	2.36403	2.84613	2.73577	3.92941	3.76387	3.70288	3.54605	2.85485	3.75225
Peak_1235	Chr1	6942613	6944509	4.29621	4.1541	3.44702	4.3456	5.70083	5.17052	7.7155	8.97108	8.13142	10.9519	7.43387	8.20334	9.03954	11.0221	10.8514	7.44947	7.95466	7.15659	6.07257	9.19377	11.5724	5.65664	6.81258	4.9565	4.1099	4.19656	3.36989
Peak_1236	Chr1	6945586	6946561	1.80884	1.72295	1.88968	3.79453	1.71789	3.05347	4.03705	2.92042	4.12294	7.7541	2.14737	4.61473	4.46652	4.19031	4.64168	3.77937	4.89263	3.76589	3.32126	6.18441	9.10483	2.06484	1.11663	2.07158	3.52168	1.28842	2.92042
Peak_1237	Chr1	6948965	6949853	3.78682	4.79084	5.74309	5.83	5.44539	5.11996	5.50272	4.65771	6.71013	4.26941	7.89166	5.77822	6.69534	6.76375	7.21307	5.03676	5.09778	5.11072	4.75755	4.62073	4.27496	6.25527	7.44975	4.90363	4.62073	4.33783	4.06047
Peak_1238	Chr1	6955811	6956335	0.826591	0.447737	0.798412	1.46219	1.91306	1.92558	2.11031	0.782757	2.46412	0.926783	1.06142	1.04889	1.27746	1.71893	0.785887	2.62693	2.08526	2.74904	2.30443	2.08526	3.59128	1.27746	1.59682	1.59682	1.7565	0.748315	1.95376
Peak_1239	Chr1	6956386	6956804	1.36132	1.08278	1.0004	2.9188	1.80071	1.82817	1.53786	1.85956	0.600238	1.63594	2.3421	1.82033	3.21304	1.54179	1.19263	2.0361	1.18871	1.70656	2.52257	2.10279	1.84779	0.800317	1.7301	0.600238	1.20048	1.34955	1.33778
Peak_1240	Chr1	6957647	6958983	1.00324	0.998322	1.22577	1.7987	1.00324	1.10897	3.04169	2.66301	2.85235	4.01787	1.06594	2.3077	2.61015	2.53515	2.58678	2.7835	2.99988	3.37733	1.52945	3.21627	5.1625	1.71387	0.877835	1.00324	2.06918	0.86677	1.72247
Peak_1241	Chr1	6966858	6967979	8.85624	8.20283	7.94205	8.56177	9.2518	9.25473	9.14046	9.25767	8.01969	6.84472	9.89349	6.6235	7.1729	7.77063	9.3397	8.35226	7.81606	7.33845	6.71873	5.60382	6.85058	8.27315	8.5647	7.75013	5.93785	7.92447	6.24844
Peak_1242	Chr1	6969695	6971033	8.38222	6.54569	8.05322	7.69107	7.65055	8.12441	7.19142	8.80452	7.07234	6.44993	10.3845	9.67122	6.55797	8.47797	7.62354	6.84892	7.57567	8.16861	7.8261	7.01219	6.03868	9.13475	9.93639	9.71542	5.98589	6.80227	5.50589
Peak_1243	Chr1	6971349	6972779	12.0556	13.318	12.7287	13.2973	13.9073	13.1055	12.5587	12.862	13.2606	15.025	19.6278	16.0037	15.0181	15.3834	15.4948	16.1369	17.945	15.0032	15.0767	12.3209	13.4984	16.354	16.4413	17.2087	12.8298	11.7937	13.0756
Peak_1244	Chr1	6986281	6987036	2.13736	2.66137	1.55247	4.79004	4.94006	4.65088	5.8772	4.94659	4.67697	5.53148	5.25751	4.07251	3.72244	6.01418	5.5206	4.83135	4.84874	4.86179	3.21582	3.99206	4.05511	4.84874	4.1921	5.31622	3.90726	3.10276	3.31367
Peak_1245	Chr1	6998576	6999834	3.98609	4.46134	3.46253	4.93137	3.5957	4.48614	4.23547	3.49387	3.52781	4.60365	4.18193	5.06584	6.06988	6.54251	5.46014	4.98751	6.53599	5.85706	6.43414	6.85717	6.38845	4.26158	5.21469	4.48745	4.71071	5.06062	3.93256
Peak_1246	Chr1	7003537	7004489	7.81878	6.42164	6.66485	6.09392	8.91233	8.81574	8.32416	8.09303	7.85672	7.27717	9.83168	8.20859	7.78083	9.61435	8.0637	6.9874	8.54149	9.16072	6.84768	6.6062	6.21121	9.15899	10.2577	8.92269	4.92619	7.12711	7.10296
Peak_1247	Chr1	7006905	7007712	3.39133	3.93248	4.8744	6.89659	6.23337	7.9504	6.81725	7.58218	7.77748	4.48176	6.92914	5.55796	4.43701	6.55888	6.97186	4.78286	4.60383	5.87329	5.52541	5.04325	4.00978	5.97298	7.18751	5.09005	3.63139	4.35767	2.80136
Peak_1248	Chr1	7008679	7010312	3.64269	3.62257	3.58837	4.18995	6.20796	6.05405	5.43134	5.49472	5.52993	4.19196	6.04399	5.85788	5.79954	6.87494	6.10535	5.84078	6.55101	6.3468	4.48068	4.94042	4.76336	5.50981	4.80864	5.34081	3.79661	4.15374	3.94851
Peak_1249	Chr1	7016620	7017431	5.67026	6.25328	5.65609	7.01242	5.71479	7.01241	5.03663	6.71079	5.55284	8.47199	9.00439	7.72297	8.29182	7.28166	8.34243	5.16215	6.71079	6.09133	6.8039	8.18452	5.98404	7.21688	6.6865	7.30798	4.0953	6.04477	4.96983
Peak_1250	Chr1	7022314	7023159	5.04989	5.96311	5.78046	5.45792	7.43008	5.37437	6.50909	7.54472	7.06868	6.57709	6.50326	6.33033	7.09588	8.3122	8.05378	6.66648	6.92296	6.50521	5.4074	5.67748	7.12308	6.47995	6.05637	6.48966	4.06284	5.17036	5.22864
Peak_1251	Chr1	7029495	7030506	6.96661	7.31746	7.24437	8.25143	6.19994	8.50644	9.15941	8.61527	9.12692	6.70997	8.71435	7.28984	9.06196	8.63801	8.23356	8.63639	7.12417	8.13935	7.79012	8.17346	7.8551	10.1064	10.5579	8.61527	6.55728	7.70404	6.67748
Peak_1252	Chr1	7032326	7032961	2.79909	2.43725	2.65436	2.45793	3.63908	3.59772	2.32353	3.69077	2.50445	1.97978	1.72391	2.10643	2.4967	1.28712	1.42927	1.81437	2.46568	2.87663	3.65717	1.67222	1.207	1.18632	0.527253	2.02114	2.64402	1.18632	2.19689
Peak_1253	Chr1	7038673	7040209	10.7033	12.2423	14.1161	11.344	11.4274	9.72476	13.3642	12.5439	12.1343	9.27451	11.776	12.9867	9.76434	10.9632	10.1483	9.72263	11.4937	9.93439	10.9215	10.3301	10.6509	10.8563	9.96113	10.6199	9.7376	11.653	8.78148
Peak_1254	Chr1	7041889	7043487	8.81622	11.2619	12.3228	11.7512	11.8159	11.3441	12.1675	11.9373	13.2151	12.8152	12.884	12.5407	12.3207	10.5659	10.8465	12.404	14.0354	12.7987	11.2444	10.5772	11.6905	8.54585	10.2184	9.33228	10.202	8.50884	9.32713
Peak_1255	Chr1	7043744	7044415	0.748511	0.748511	0.998015	1.6707	0.873262	0.998014	2.67116	3.63003	2.38741	2.35561	1.36982	2.26265	1.74653	1.84682	2.22596	1.99358	2.37028	2.02783	2.30424	2.15013	1.82969	1.74653	1.24752	1.62177	1.39673	1.37227	0.770526
Peak_1256	Chr1	7052816	7053784	8.37162	6.58024	8.68714	6.11035	9.2215	7.60146	8.82455	10.3886	11.3097	10.9365	11.8119	10.2003	11.1147	13.1673	11.3725	9.03151	10.794	10.5837	8.51241	10.1291	9.58282	10.7703	9.63372	10.8144	6.80247	7.48102	7.46066
Peak_1257	Chr1	7062139	7062680	1.46789	1.35264	1.05239	2.91454	2.62945	2.14117	3.24815	4.06398	2.78413	2.9388	1.82879	3.40889	3.51504	2.45962	2.32011	3.08741	3.23905	2.62946	4.44005	2.51724	1.36174	2.3656	2.47175	2.22306	2.15633	1.85609	1.5528
Peak_1258	Chr1	7081900	7082646	2.91789	3.7827	2.9421	3.67267	6.02502	5.04359	5.10521	5.25924	5.02599	4.92916	4.96217	6.22307	5.76536	6.63457	6.49153	3.08513	4.55288	2.93329	4.17438	5.63113	4.95557	4.39224	5.01939	5.35167	3.25457	3.29418	4.77733
Peak_1259	Chr1	7083142	7083967	6.48759	6.006	4.20301	8.19705	7.84282	8.71645	7.42093	10.2269	8.52541	7.3055	7.07267	7.75526	7.32143	7.17018	8.1274	8.73238	9.17815	7.78312	9.0667	7.19008	5.88659	9.4289	7.78909	7.74332	5.68361	7.74929	5.27763
Peak_1260	Chr1	7084505	7085711	3.3761	3.72747	3.36248	4.25996	3.68388	3.18816	3.59809	3.54225	3.88953	5.39713	5.82067	5.59324	6.53702	6.44305	6.34499	7.45357	7.47944	7.53664	4.77883	3.47279	3.64984	4.04478	5.45024	4.39206	5.3481	3.68116	4.99401
Peak_1261	Chr1	7088067	7089300	5.65469	5.54546	5.54546	6.11426	6.85755	6.5272	7.30247	6.33405	7.34643	7.28249	7.50228	6.47391	7.87127	9.59098	8.95558	10.0452	11.2255	9.34589	6.55517	6.11292	5.68132	5.50816	5.53613	4.79283	6.92948	4.27998	5.40425
Peak_1262	Chr1	7091193	7092006	6.55698	5.93905	7.8918	6.12281	6.6943	9.31345	6.28638	7.9019	7.74236	9.15998	10.2505	9.57193	7.73227	8.42088	7.31223	7.80497	8.71572	7.92411	7.30213	7.6212	6.77305	8.76822	10.2908	8.80457	5.1333	6.08444	5.36149
Peak_1263	Chr1	7094261	7094976	2.31416	2.4588	2.10754	3.84316	2.02948	3.00519	3.3312	3.52864	3.80183	2.34171	1.52211	1.91699	1.74251	1.52211	1.82516	3.27839	1.86419	2.69297	1.40503	2.22462	3.29446	0.819599	1.34304	1.12494	2.19478	1.43717	1.61394
Peak_1264	Chr1	7095905	7097138	1.83294	2.43105	2.31915	5.36429	2.32315	2.61754	3.8697	4.48379	4.41052	5.48284	1.6984	3.78444	2.50431	3.00384	2.77606	3.44343	3.34885	4.23868	3.24495	4.33592	5.30967	1.3534	1.83428	1.85692	2.42306	1.53589	2.57092
Peak_1265	Chr1	7098445	7099585	5.15755	3.47486	2.57157	4.47756	4.32341	5.24399	5.8044	4.2168	4.35366	6.22939	4.54815	5.12009	5.88796	5.68915	5.69779	7.26955	6.81575	6.76388	5.42263	5.81304	5.76262	4.12748	4.65908	4.65332	4.33493	3.84079	5.14314
Peak_1266	Chr1	7103813	7106051	4.6054	8.56327	10.7907	9.51915	12.5923	11.566	12.4932	12.8647	11.1952	6.06564	5.61487	6.15007	8.41497	8.24537	7.57508	7.81956	6.7954	6.87616	4.38074	5.18759	5.91587	4.71773	4.38075	4.15609	4.83959	3.6319	3.89399
Peak_1267	Chr1	7112488	7113240	5.45528	4.95756	5.53387	5.56007	6.24552	8.10542	7.34793	9.18164	8.41759	6.29791	6.29573	7.01175	5.8897	6.19095	5.98793	4.8113	4.79166	4.46639	4.7982	4.61483	3.40327	5.94427	6.03814	6.0687	4.09965	5.22825	4.56462
Peak_1268	Chr1	7117489	7118291	3.38584	2.97847	2.8884	3.4104	4.20466	3.22207	5.02348	4.73075	5.1852	3.7932	3.71336	4.69186	3.6929	2.96209	3.75021	3.3797	4.6284	3.53937	4.48306	3.41654	4.52195	3.16475	3.2405	4.4892	3.46362	2.5056	2.02249
Peak_1269	Chr1	7120933	7121961	4.66299	5.21412	5.70294	6.59912	6.43138	5.5384	7.65504	8.45377	7.3643	6.52403	6.58633	6.65502	8.60873	7.49529	7.2349	6.80359	7.61351	7.53843	8.16782	7.08794	7.1103	6.96813	7.04641	5.7269	6.76205	5.44735	6.28441
Peak_1270	Chr1	7128105	7129567	5.45158	5.95045	6.47516	7.33806	7.6167	7.22233	8.11333	7.77626	7.72681	7.8167	7.72007	6.83582	7.92569	7.50659	8.19197	6.19876	6.1819	5.81562	6.40549	6.27066	5.66618	8.82905	8.62905	7.85491	4.98529	5.44372	5.05159
Peak_1271	Chr1	7143036	7146305	1.95747	2.0766	2.64062	3.20262	2.48428	2.29628	5.22242	4.53776	5.17869	7.82885	4.21906	5.68439	7.59813	8.1737	7.79568	6.66313	7.25529	6.89386	4.73532	5.90859	6.45199	2.40989	2.48277	2.4501	2.51243	1.91122	2.38425
Peak_1272	Chr1	7146625	7147288	2.47311	1.13629	0.757529	1.58685	2.14633	2.2107	4.25801	5.31013	2.78008	4.15155	4.81254	3.66139	3.76784	4.86452	4.98583	2.32953	3.93371	3.44106	3.46334	4.66648	3.53513	2.65878	2.87663	2.56223	1.64379	1.51506	1.39128
Peak_1273	Chr1	7154422	7155691	5.21482	5.38826	4.99608	4.66991	4.91065	5.16952	7.6598	5.87493	7.58602	5.28083	5.89175	4.35668	5.7209	5.77526	5.0828	4.78899	4.94949	4.31786	3.99427	5.02844	4.78511	5.06856	5.4245	4.87959	3.42866	3.2371	3.37688
Peak_1274	Chr1	7159168	7160468	5.17648	6.186	6.45513	9.23478	7.97888	7.66806	7.8399	8.75087	7.55814	7.19678	4.83281	6.42732	6.83417	7.51897	7.27386	4.82018	5.41781	5.155	4.06209	6.795	7.86137	5.40012	5.22576	5.89919	2.96412	4.28952	3.6085
Peak_1275	Chr1	7167056	7168094	7.50384	8.53853	9.02423	9.6365	10.5984	11.0271	9.73142	10.2219	9.26312	10.1491	10.2788	10.8468	9.21882	9.88171	9.21724	9.19509	8.51163	9.07327	8.98941	11.3008	11.7802	10.7534	10.5699	11.4575	7.26178	8.14933	6.75076
Peak_1276	Chr1	7175856	7176435	3.17988	2.02356	2.45718	2.58755	2.97299	4.59694	3.75804	3.15437	4.14348	1.6948	3.88841	3.55965	3.34426	3.09202	5.27146	3.47746	3.70419	3.93943	4.16048	2.78594	2.6584	5.15526	4.29369	4.99088	3.25073	3.11753	2.20778
Peak_1277	Chr1	7176725	7177772	6.28028	4.12986	2.82801	3.84596	8.09973	6.96884	7.03943	7.9225	7.14138	7.11315	8.77576	6.93904	9.05496	8.46833	7.74211	7.03943	7.64801	7.34843	6.47947	6.22694	6.1595	8.91379	8.39932	9.57884	6.39477	8.07935	7.27941
Peak_1278	Chr1	7179395	7180563	5.10854	5.35181	5.59366	5.63866	6.33892	6.81279	7.60165	9.16388	8.33706	9.75867	11.3097	9.15403	10.0666	11.5543	11.2	9.38746	8.41018	9.86836	9.0556	8.87139	8.71531	10.3591	9.38746	10.3563	5.66397	5.49101	6.02394
Peak_1279	Chr1	7192376	7192787	0.219438	0.406957	0	0.813915	1.26077	1.01739	1.50016	1.62783	2.6532	1.22087	0.406957	0.406957	1.4044	0.610436	1.29668	1.42435	1.39243	1.62783	2.25422	2.07867	1.92706	0.490743	1.0533	0.442865	1.62783	0.582508	1.64778
Peak_1280	Chr1	7209247	7210174	4.87823	5.35117	7.69995	7.33683	7.38287	7.69817	8.40139	10.0009	7.6716	7.24825	11.1292	10.5234	6.95599	10.3002	7.94793	7.85051	8.15872	9.59881	7.99929	7.56886	8.03295	10.2985	10.5695	9.84679	6.58224	5.96228	7.48561
Peak_1281	Chr1	7216118	7216806	4.08442	5.45385	5.1437	4.657	5.02441	5.78069	8.11159	7.49367	8.30483	4.49	7.21453	7.46504	4.98863	5.92622	6.27932	5.37989	4.13691	4.37787	5.20811	3.56671	4.59974	6.55846	3.54763	4.95761	3.21839	4.13691	3.40686
Peak_1282	Chr1	7217020	7217880	4.26316	4.46744	7.0009	6.08259	6.80234	7.6691	5.12037	6.05014	4.98864	4.26125	6.64197	6.48542	5.84204	6.13413	6.67061	5.81531	6.5427	5.25783	5.98713	3.49758	3.85841	7.66147	6.93981	7.83329	3.90996	5.6473	4.71372
Peak_1283	Chr1	7231889	7232814	6.84675	8.42664	9.55386	10.4255	11.913	10.2284	10.5018	11.5367	11.6645	8.99823	12.0923	8.0361	10.2905	10.3012	9.23255	8.66806	10.2586	10.0065	7.94912	8.44261	9.67811	10.2213	10.974	9.86628	6.52367	9.24853	7.32426
Peak_1284	Chr1	7233655	7234287	3.37587	2.98115	3.66931	3.01491	2.99413	3.79396	4.63014	5.54681	7.39834	5.02485	4.13414	3.32393	3.99911	3.31614	3.38366	3.21487	3.12398	3.42002	3.65373	3.3525	3.95756	3.06685	2.59423	4.09259	3.34211	3.8407	3.70047
Peak_1285	Chr1	7238704	7239659	5.78765	7.07208	7.84239	10.6107	7.21135	7.64808	8.99613	9.24889	8.8345	8.5955	5.90801	5.94927	8.06763	8.89812	7.33171	6.83995	9.07695	6.93968	5.84783	6.5528	8.01089	5.84955	4.52042	5.78421	5.69995	5.27869	5.84439
Peak_1286	Chr1	7242803	7243690	4.50191	5.33676	6.51777	6.23085	7.13604	7.55254	6.75286	6.36968	6.73064	5.19977	6.93056	4.72774	6.8917	8.4022	7.72654	5.85322	5.92356	5.1535	5.88284	5.69772	6.2327	5.75881	6.4789	5.85877	3.39864	5.21644	3.68186
Peak_1287	Chr1	7247239	7248247	3.98159	2.46161	1.99405	2.11786	5.22298	4.49476	3.74699	3.06276	4.04023	4.4638	6.80323	4.6707	3.07905	3.92945	3.86917	4.31719	4.60228	4.95743	5.4315	4.24061	3.03506	4.57133	5.6042	5.3973	3.457	4.96232	3.49936
Peak_1288	Chr1	7261024	7261556	1.85659	2.12181	2.75096	3.99999	3.58364	3.93214	4.07709	2.64302	3.72242	1.71472	0.786428	2.10639	2.26985	2.91441	1.69005	1.9121	2.89899	2.202	1.72706	2.202	1.35389	1.41865	0.786428	1.76407	1.63454	1.92135	1.41557
Peak_1289	Chr1	7264345	7265530	4.869	6.12887	5.70059	6.6001	6.87314	6.85651	6.07481	7.39844	6.43101	8.31319	8.63335	7.56336	6.74841	7.46912	7.40397	5.96255	6.26885	6.66525	9.27091	8.1732	7.1642	8.6292	8.46704	7.31389	6.06233	7.21549	6.43239
Peak_1290	Chr1	7266723	7267424	2.94805	4.47944	4.61994	3.56388	5.964	5.91483	5.02269	5.68301	5.56827	4.56374	5.46758	5.73452	4.80492	4.77214	5.39265	4.0603	3.82146	5.02035	4.15162	2.85438	3.53812	4.88454	4.72765	4.47008	3.26884	5.85161	3.99005
Peak_1291	Chr1	7280520	7281275	6.2577	5.97722	5.75544	7.35356	6.5034	6.73388	6.89696	7.31877	6.79258	6.64908	6.0881	8.96256	5.84893	6.92957	5.64672	6.18813	5.96635	6.18595	9.7801	6.85781	5.00312	7.37966	8.29287	7.43184	6.83172	6.20987	6.65343
Peak_1292	Chr1	7284965	7285902	4.48449	6.13179	7.20428	8.55366	6.32105	6.9712	10.4148	7.81939	7.53198	9.59285	8.28378	8.36439	7.78434	8.55015	6.95718	7.58631	6.83101	7.86495	8.00514	7.74052	7.74753	6.25972	7.37427	7.65816	7.43735	6.59794	6.4297
Peak_1293	Chr1	7300661	7301525	3.49281	4.93327	5.17461	6.77849	6.8336	6.24259	5.05489	6.8127	6.14758	3.66954	5.57748	4.83825	4.47529	6.72338	4.94277	5.21832	4.93327	4.46008	6.15518	4.5874	5.18031	6.51054	7.13005	6.09817	3.49281	5.1062	4.45818
Peak_1294	Chr1	7309531	7310358	5.06239	6.10267	6.64464	5.5051	6.1781	5.32246	7.09132	8.80856	7.68292	3.55161	6.56125	4.19484	6.66052	6.54537	6.83522	3.10891	7.39705	6.0709	6.89478	6.70419	6.84912	7.6869	8.31027	7.51021	7.08735	4.35366	5.97362
Peak_1295	Chr1	7313896	7314938	9.63263	8.74534	7.0653	7.31273	7.65157	8.65234	8.00776	8.61453	7.88955	6.64922	10.7721	9.41199	8.98962	7.14567	7.15355	7.75244	7.30485	8.31823	9.13776	8.2016	6.99437	10.6271	10.3718	11.7004	8.28671	7.80603	7.32849
Peak_1296	Chr1	7324493	7325817	6.32704	7.10613	8.78838	8.14451	9.41239	9.82303	8.82311	10.4843	8.69657	8.92112	9.28957	9.49675	7.49072	6.48335	8.14574	8.36285	7.95098	7.30959	6.94857	7.62842	6.24391	9.77961	9.10225	11.2485	7.27609	8.76853	7.16319
Peak_1297	Chr1	7337681	7339113	7.56166	8.90376	9.46813	9.82947	10.4363	10.4569	9.89944	10.738	9.07697	6.97893	7.75322	7.72225	7.37124	7.81057	7.83925	8.93244	7.49513	7.01679	6.77016	6.86766	7.92184	9.59661	10.0956	9.50828	7.89775	6.82981	8.79019
Peak_1298	Chr1	7346105	7346982	6.11834	4.65241	5.10735	7.02261	6.58826	6.00975	7.73405	8.69261	7.25663	4.79469	4.72917	6.15765	3.8586	5.78321	6.03221	5.92925	6.23816	4.98192	4.98378	5.40503	6.01536	6.63132	5.37508	6.88968	5.13356	6.31866	5.8244
Peak_1299	Chr1	7366729	7367745	6.67698	6.56061	6.94852	6.51212	5.41626	6.41514	7.3817	7.04227	7.43018	5.77831	4.45132	4.34626	3.58336	3.2601	3.62862	5.55688	5.02835	5.45182	5.37423	7.115	7.14086	4.71801	4.83762	4.06341	9.40369	7.2637	8.60685
Peak_1300	Chr1	7371572	7372970	4.07481	3.71527	3.41565	3.35573	5.09351	4.61412	4.50133	4.03721	5.08176	3.23588	5.02536	4.37443	2.79644	3.35102	2.94801	3.09136	3.37923	2.95741	3.63067	2.51679	3.68237	4.26868	4.42495	4.43083	3.69999	4.53893	3.2958
Peak_1301	Chr1	7374173	7375004	3.22436	4.53425	5.35417	4.77331	5.18623	6.58305	5.74338	6.43883	5.87575	3.92178	5.7335	4.02451	3.55035	5.70189	4.44534	4.1075	3.71236	2.49532	2.6514	2.47358	3.23818	2.97739	3.92968	3.92573	4.15293	3.13742	3.22633
Peak_1302	Chr1	7377289	7378227	4.1086	4.10685	4.50773	6.33008	6.59791	7.1896	6.39135	5.75764	5.86267	5.80315	6.5629	6.24954	6.09025	4.82108	6.34232	5.28848	5.35676	6.96378	4.55149	7.12483	4.83858	5.0434	5.62634	5.9607	4.94362	3.58167	4.29591
Peak_1303	Chr1	7381630	7382496	6.34385	6.07652	6.7894	6.40073	8.91096	7.7222	9.3148	9.46648	8.31563	5.05081	7.88336	7.01691	6.18838	6.95434	5.22524	6.49173	7.34681	6.78181	6.05945	4.98255	4.56734	6.50501	6.25284	5.65752	5.17025	6.37039	4.6318
Peak_1304	Chr1	7384709	7385439	1.81019	1.43466	0.987173	3.19763	3.61139	2.46006	2.15874	1.72024	2.15874	1.6303	1.18281	1.66852	1.60556	2.72316	2.08678	2.01932	2.66469	1.68427	2.35437	2.33863	3.40451	0.798283	1.26826	1.89114	2.61072	1.94961	1.46389
Peak_1305	Chr1	7399091	7400563	2.20846	2.89142	2.04441	2.16159	3.08224	2.41825	3.41256	2.90258	2.21962	3.90804	2.72291	3.1983	2.44504	2.4774	2.67269	3.27865	2.93271	2.58342	4.09887	2.82781	2.83897	2.11249	2.53431	2.666	3.08447	2.66823	2.06673
Peak_1306	Chr1	7407303	7407825	1.94552	1.63436	1.01833	2.48926	2.04923	2.78155	2.92928	2.52069	3.32529	2.68098	2.11838	2.2441	3.22786	2.71555	2.08695	2.47668	3.253	2.73127	2.31325	1.56836	2.40439	1.92352	1.85751	1.65322	1.44264	2.02095	1.5715
Peak_1307	Chr1	7412152	7413630	5.5482	5.5871	5.11475	6.58516	7.37648	5.4215	7.05862	6.89969	6.4051	8.07445	8.1078	7.28424	7.18755	7.69324	8.34342	7.45651	7.8255	7.36204	6.94636	7.65767	6.28285	7.14087	8.66351	6.9686	5.86718	6.26174	6.38065
Peak_1308	Chr1	7420257	7421010	4.30568	5.49165	4.7635	7.01553	6.37676	6.58169	7.91373	7.81127	8.78358	7.3578	6.57733	7.04605	7.1834	8.17098	5.49601	5.45023	6.45089	6.1326	6.45089	5.55269	6.8542	7.46899	7.91809	6.10426	3.67999	5.50473	3.55791
Peak_1309	Chr1	7421107	7421992	5.42487	4.84602	4.20409	3.88684	5.21893	4.44528	4.98888	4.14843	4.54175	4.82376	6.15957	5.14472	4.08906	3.9462	4.90353	4.57144	3.82561	3.91838	4.80891	3.78294	4.49723	4.38035	6.24491	5.28944	4.37107	5.96105	4.75326
Peak_1310	Chr1	7439328	7441618	4.31791	4.57405	4.27629	3.91539	3.98857	4.02516	4.1249	4.79432	4.44777	4.92132	8.16584	7.24529	6.38358	5.35684	6.27452	8.39186	8.6724	8.38827	6.49192	4.3136	3.8422	6.79471	6.80619	7.07095	7.02574	5.52546	6.1425
Peak_1311	Chr1	7442195	7443119	6.69067	6.0296	5.16594	7.06385	4.56706	5.74881	7.64495	8.51927	8.79115	6.44543	7.8422	6.44543	7.07629	7.38372	6.61602	7.14026	7.78356	6.55916	4.74122	6.8968	6.54316	7.6645	6.79907	6.23396	5.73815	5.42895	5.05931
Peak_1312	Chr1	7444797	7446598	6.42555	5.94026	6.14095	5.5544	6.47663	6.0479	6.83878	7.37881	6.32703	8.61757	11.2228	10.6262	9.21416	9.02897	9.89283	9.23605	9.48599	10.6664	10.3234	7.76922	6.16831	8.88576	10.9054	9.23605	6.02874	6.66546	7.01574
Peak_1313	Chr1	7447656	7448582	4.72035	5.67435	5.38177	5.23104	5.53249	5.10869	5.63357	7.39616	6.38364	5.48639	5.52185	5.47397	6.48649	8.17106	5.96161	5.55555	5.46156	5.5786	5.7967	5.78429	6.23824	6.51132	5.14416	5.15479	4.88349	5.06968	4.25044
Peak_1314	Chr1	7465967	7466347	1.51436	1.54024	0.966427	1.81637	1.76028	0.440069	2.20035	2.66199	2.29526	1.98463	0.660104	2.14857	1.67399	1.32021	1.31589	2.9942	1.8854	1.64379	2.29095	1.20372	1.84225	1.30295	1.30295	2.19172	2.26075	1.44101	1.00526
Peak_1315	Chr1	7478265	7479188	6.31186	6.56092	8.61922	7.28319	7.51268	7.21737	6.69613	6.89537	5.81552	6.15175	6.4862	6.29763	8.18514	8.11398	6.95763	6.02901	5.7159	6.3848	5.86178	6.91672	6.842	5.66965	5.35299	4.25535	5.7159	5.44372	4.85309
Peak_1316	Chr1	7483808	7484691	3.53117	3.93282	3.79336	5.33302	5.01504	5.59706	6.43755	3.88819	5.5952	4.2136	6.23858	6.26648	4.97785	6.52309	5.54128	4.56877	4.23406	4.62455	5.45202	5.13033	4.41071	6.49892	6.02661	5.80905	5.12103	5.21587	3.58137
Peak_1317	Chr1	7487958	7488709	3.90181	4.01329	4.0439	3.90181	6.35438	7.02326	5.94781	4.95323	5.7926	3.222	4.60567	3.89525	5.7467	6.16639	4.59255	2.80668	3.41436	4.53353	3.31818	2.59465	3.32255	5.81447	4.83082	5.10624	3.45589	3.06462	3.21107
Peak_1318	Chr1	7489680	7490696	5.34676	4.17817	2.95623	3.7854	4.00683	4.85701	3.64317	3.51063	3.39587	5.54879	5.51485	5.52132	3.97451	5.39363	4.18624	5.44051	4.98955	3.77247	4.28322	4.65013	4.66306	4.61619	4.49173	4.84732	3.50901	5.17058	3.54457
Peak_1319	Chr1	7493431	7493971	2.16944	2.16944	1.26399	3.88919	2.16032	1.68025	3.04147	2.59482	2.31528	4.3176	1.70456	3.53369	1.62556	1.59517	2.2454	2.02359	3.95907	2.95335	1.70456	1.6286	2.25451	2.73155	1.95675	2.29705	2.37301	3.03539	2.72243
Peak_1320	Chr1	7494378	7495015	1.95554	1.82414	2.17712	2.72075	2.31367	2.7594	5.08596	3.40867	4.38258	1.81383	3.01447	2.28791	3.11753	2.02253	2.1024	2.46568	2.3652	1.68501	1.8396	2.44765	3.4164	2.35232	2.2235	1.48405	2.628	2.1024	2.49402
Peak_1321	Chr1	7497034	7497921	3.88734	4.51672	5.71624	6.88799	6.90095	6.22714	7.68582	6.58071	7.10827	6.22159	5.27752	5.9032	4.74255	4.50376	4.90545	4.69442	4.31495	3.90585	3.72074	5.06649	4.55189	5.77177	5.09241	5.12573	4.69072	4.45748	3.49305
Peak_1322	Chr1	7503395	7504226	3.14138	3.21645	4.38607	4.30704	3.88424	3.76175	3.98895	5.09337	4.78516	4.36434	2.86675	3.83682	5.09337	4.67452	5.50827	4.90173	2.89244	3.43971	4.67057	3.82892	4.14898	4.83653	4.69823	4.03044	4.22604	3.16311	3.38043
Peak_1323	Chr1	7509001	7509758	4.44343	4.81643	4.75137	4.51066	5.35641	6.18047	5.25882	7.34067	5.66218	5.85084	5.72723	5.69037	4.61692	5.43448	5.25015	4.35886	4.51934	4.71451	4.44343	4.70149	4.8251	4.71668	4.42609	4.888	4.18971	4.80342	3.88827
Peak_1324	Chr1	7520625	7521590	4.60976	5.01985	5.54736	6.64662	7.64548	6.85082	6.60408	6.39138	6.63641	6.66023	6.16165	5.56608	6.87124	5.75326	6.66874	6.5156	7.11628	6.51219	5.173	6.90017	5.74305	7.08905	9.39818	7.27794	4.33919	4.6523	5.30232
Peak_1325	Chr1	7529734	7531157	4.17989	7.10962	10.0024	8.52369	5.52701	6.1111	11.091	10.209	9.79808	8.39325	5.09759	6.24963	8.10236	9.09162	7.99269	5.03988	5.76942	5.66438	4.82401	6.88798	7.72142	3.30143	3.94325	3.45958	3.17907	3.35568	3.76663
Peak_1326	Chr1	7554711	7555413	2.9345	4.04985	4.66714	6.00228	4.85888	5.13947	4.29302	6.52839	5.30081	4.46605	5.29145	5.41304	6.03268	6.07243	3.98671	4.9454	5.08335	6.40914	3.43255	4.29302	4.03348	6.72948	5.81522	6.05373	4.29302	3.60324	3.91189
Peak_1327	Chr1	7564744	7565896	8.37434	8.87047	9.7886	8.52831	9.80998	9.17698	10.0338	10.1279	9.7444	10.3417	10.8521	9.52484	8.16762	10.0138	8.60387	9.42933	10.1393	10.202	8.74643	9.67026	9.00163	11.2656	12.1523	12.446	9.07861	10.7267	8.94317
Peak_1328	Chr1	7568571	7570035	5.76392	7.29551	8.48262	7.11822	8.60941	7.88121	7.37517	7.87784	6.99255	7.63997	8.339	8.01136	7.95414	8.18303	8.33675	9.54856	8.80689	8.69806	7.1631	7.815	5.79421	7.3819	8.79455	7.92946	4.97849	5.81217	6.12297
Peak_1329	Chr1	7572688	7574697	9.79158	10.032	8.70799	10.1874	11.7559	11.3838	9.88481	10.9872	9.05065	11.4983	14.8505	14.7974	11.8386	13.9599	12.8322	12.8494	12.9655	12.7627	10.2422	10.6462	10.4916	14.0924	15.3265	13.5355	8.21649	9.30826	9.61248
Peak_1330	Chr1	7580999	7581967	7.99842	7.87288	8.01199	9.94925	9.18418	9.66934	8.73464	8.22234	8.12055	9.26391	13.8747	10.0442	11.0027	11.174	10.9043	11.5184	9.26391	10.3123	8.45982	9.0315	9.42167	10.8992	11.5913	11.0027	8.82454	8.26814	8.11716
Peak_1331	Chr1	7588507	7589444	6.43496	7.48292	9.90654	7.5425	9.03382	7.63713	7.52673	8.07875	7.1149	5.45184	7.88422	6.21415	7.22181	6.45949	8.20667	5.01198	6.33332	5.85666	5.89871	6.15457	6.48052	7.73878	8.26276	7.32871	5.11011	6.8976	6.27198
Peak_1332	Chr1	7600193	7600623	1.6743	1.09077	0.194509	1.16705	1.81923	0.625478	1.55607	1.59421	1.3997	1.70862	2.10908	1.59039	2.25783	2.11671	3.05111	1.62472	2.99391	1.86499	1.94509	2.3341	1.35012	1.96416	1.2891	2.31885	2.72312	0.389017	2.41801
Peak_1333	Chr1	7603445	7604369	3.71585	4.35027	4.46933	4.9367	5.15883	5.51069	5.16594	6.61603	4.94025	6.49518	7.96482	6.76885	5.14817	5.30277	6.3619	6.09712	6.33525	5.76481	6.56449	6.91102	6.86481	5.72039	6.42766	5.22814	4.25963	6.87726	4.70212
Peak_1334	Chr1	7605549	7606739	11.2194	10.39	10.9972	10.7378	11.7356	13.4719	10.8965	9.07741	10.2381	9.84202	12.7017	12.9874	10.4438	11.7218	10.9075	9.12986	11.5686	11.0414	11.0138	11.4734	10.8565	11.7508	14.1344	11.8253	8.57226	10.6287	10.0656
Peak_1335	Chr1	7610318	7612211	4.69183	4.44795	3.8465	6.43803	4.30648	4.80292	5.65693	6.2523	5.9494	10.6395	8.37776	9.10679	10.6221	10.5831	9.44093	10.8816	10.8322	13.0297	7.21132	8.34392	9.20747	7.3389	6.53436	7.6687	6.81382	4.30822	6.34429
Peak_1336	Chr1	7612837	7614849	5.53891	5.79042	6.49676	5.9276	6.7303	5.99537	7.0104	6.94507	6.54575	12.7567	9.67736	10.9627	12.6024	12.9217	12.9935	13.904	16.0582	13.5341	8.61253	12.0087	13.6182	8.18383	8.38063	8.24834	6.85197	5.39111	7.50933
Peak_1337	Chr1	7615514	7616193	3.38185	2.72434	3.49789	4.9217	3.22472	3.63084	4.07079	4.06113	4.17715	4.12397	4.21583	2.73642	3.50756	3.33109	4.75006	2.58172	4.98938	3.09419	3.78071	4.63403	3.16187	3.74687	3.86532	4.6848	2.83553	2.91531	3.20539
Peak_1338	Chr1	7619184	7619824	3.66198	4.17999	4.04921	5.3904	4.44669	3.27219	4.40823	6.59824	5.09549	5.16729	3.82867	4.31078	4.39797	4.91854	4.88008	5.26987	4.77237	4.10306	6.8598	6.36487	6.85211	3.6466	5.17242	4.80315	5.88276	3.4876	6.35461
Peak_1339	Chr1	7623287	7625173	6.48456	6.35302	7.65795	7.01507	7.6562	8.03252	9.03953	9.12316	8.41407	9.07611	10.3854	8.37487	10.0039	9.04214	9.29128	7.45062	8.32348	7.563	8.44107	8.52121	7.44365	8.52819	9.21288	9.33745	6.58212	6.60477	6.04203
Peak_1340	Chr1	7626219	7627074	5.18869	4.72013	6.69614	6.13732	6.67117	6.45225	8.25927	7.4297	8.29383	8.48394	9.38265	7.639	7.51227	8.8296	9.06388	6.68269	5.98946	6.10084	5.3039	6.88048	6.93425	7.00339	8.53196	8.21318	5.48441	5.3884	5.77822
Peak_1341	Chr1	7630139	7630969	5.79381	5.26171	5.54853	6.25668	5.53468	5.04609	7.54046	6.67999	6.75911	9.34645	6.98066	6.45647	7.87674	6.61867	8.033	5.44765	7.61365	5.75821	7.58595	6.93318	6.49405	5.95008	7.22595	5.89865	5.50105	5.8314	5.70677
Peak_1342	Chr1	7641342	7642700	3.00454	3.31177	3.7581	5.15393	3.99396	4.17539	3.33838	2.96946	3.12429	3.76777	3.57666	3.95646	2.65498	2.71666	3.33233	4.45117	3.49441	3.79438	4.62051	3.01663	3.35047	3.08316	2.89931	3.02268	3.41821	3.4932	3.45449
Peak_1343	Chr1	7645544	7646631	2.6908	2.63641	3.49758	2.99448	3.81335	5.51757	5.47074	4.59294	5.31663	6.14305	5.21842	5.89679	6.47393	7.43935	5.68527	5.70643	7.07222	5.39368	5.16252	6.1642	6.62652	5.31814	5.65506	5.77441	3.05793	3.44319	3.42808
Peak_1344	Chr1	7649114	7649888	3.51453	3.89843	3.35545	5.94946	4.32475	6.07459	5.80523	5.94521	5.24739	5.00984	5.09044	5.41283	4.65139	5.84128	5.86461	4.22295	3.78178	4.59412	3.37454	4.26536	4.00236	5.49556	4.22295	4.01721	4.15931	3.4615	3.67784
Peak_1345	Chr1	7651783	7653093	5.41284	6.08741	6.48237	6.90492	6.73314	7.09675	5.74135	5.13324	5.60217	5.59966	6.23912	6.2805	6.3457	6.23034	5.50186	4.66806	5.02415	3.78285	5.62348	6.38582	5.10941	5.84793	7.01149	6.09744	3.96465	4.60411	3.81544
Peak_1346	Chr1	7654160	7654842	3.6895	5.03245	5.63413	5.72558	6.43075	5.39345	5.32848	6.99152	5.6967	2.89769	4.26952	4.04328	4.51982	5.76409	4.09864	6.39465	3.61008	5.55711	2.94582	4.90008	6.47888	4.20935	5.40068	4.64256	4.41873	3.26832	5.15519
Peak_1347	Chr1	7661560	7662691	4.3723	4.13561	3.6477	4.26485	4.65111	4.16755	2.76191	3.92505	3.55476	4.04848	5.66032	4.77889	3.24111	4.16755	3.55767	4.71355	5.18984	6.25714	5.5093	4.77163	3.87568	6.6405	3.55041	5.70244	5.07657	4.59157	3.94683
Peak_1348	Chr1	7666320	7667280	3.97862	3.31495	3.22771	2.76074	5.08189	5.44793	7.21488	5.32136	5.932	5.32136	3.97348	4.01283	4.09322	5.23412	4.79623	4.33098	3.81612	4.17362	3.98888	4.709	4.29677	4.27454	5.4907	4.08296	3.356	4.4644	3.75112
Peak_1349	Chr1	7680357	7681518	7.8568	6.99388	7.19759	7.56398	9.37327	7.26973	7.52154	9.06913	7.89923	8.98991	8.60089	9.04932	8.00817	10.0452	10.4809	9.57839	9.47513	8.41558	6.51149	7.36451	7.12685	7.59793	9.05923	9.1625	5.11809	5.88482	6.01921
Peak_1350	Chr1	7691737	7692466	4.8503	6.91742	7.98701	4.03516	6.77331	6.34997	5.45603	5.1678	4.83904	6.03022	6.33646	4.75122	5.59564	5.8118	5.05296	3.56229	4.5891	5.04846	5.37271	5.57762	4.37968	4.56883	5.43351	4.73546	4.47876	5.90638	5.41774
Peak_1351	Chr1	7696505	7697662	4.97821	5.79301	6.28983	4.30962	6.1493	6.30686	4.85045	5.6326	5.63544	3.01361	4.12224	3.11298	2.09945	2.1179	2.32089	2.46142	3.69214	2.53382	5.0648	2.89579	2.31663	5.19256	4.99524	4.75819	6.00025	4.96402	5.43813
Peak_1352	Chr1	7704513	7706296	9.92355	9.74203	10.9813	9.71807	11.4632	10.6164	12.3837	13.2489	13.0416	12.2602	12.1672	12.0732	10.2295	12.5468	11.231	8.12957	9.58539	8.51011	8.8114	10.5519	10.8265	12.11	12.4123	11.0679	8.4539	8.8971	8.12956
Peak_1353	Chr1	7712825	7713390	4.02815	3.30791	2.96811	4.57705	3.20045	3.81033	4.05139	3.2324	3.82486	1.94583	2.48892	2.90422	2.95359	3.40665	3.15398	3.00296	3.25854	2.75611	2.91584	2.85485	1.68154	2.83452	4.04848	3.72321	1.89645	3.7842	3.13656
Peak_1354	Chr1	7734643	7736432	6.41537	6.62015	5.64765	6.5173	7.45765	7.97099	6.83871	6.18212	6.01957	5.29777	9.41551	6.98656	6.32629	7.43745	6.37312	5.24543	6.79096	6.39976	7.58805	7.34746	5.3391	9.51377	9.91691	8.70565	5.71377	8.11426	6.08844
Peak_1355	Chr1	7754183	7755359	5.62687	5.78748	8.48011	7.54299	8.99544	8.83204	8.18263	8.91864	8.4396	6.638	9.38928	10.1211	8.71473	9.0527	8.04855	8.97171	7.89633	9.57643	8.14492	7.14775	7.62678	9.11416	8.4438	9.63788	7.03044	6.83772	7.20641
Peak_1356	Chr1	7759352	7760551	3.00402	2.81499	3.06019	4.4396	3.2273	3.73414	3.28347	2.93416	3.07388	5.55737	3.29579	4.41494	4.05194	3.88482	3.93961	5.46286	6.92583	5.86422	4.83959	5.59299	6.12585	2.23555	2.46842	3.27799	3.74784	3.16155	4.36563
Peak_1357	Chr1	7767856	7768565	4.13262	3.09773	3.76682	5.45692	5.88059	5.22771	4.70679	4.61419	4.47064	2.24342	5.70464	4.81097	5.68844	4.86885	6.22787	4.06085	3.56309	3.7182	4.34793	4.0678	4.1442	3.85712	5.25086	4.3734	3.06995	3.06995	2.7273
Peak_1358	Chr1	7771550	7772343	2.7431	2.73482	3.99768	5.068	4.82371	4.01217	4.69329	7.04925	6.29567	4.63325	4.22333	5.451	4.45314	4.05978	3.60847	2.88802	4.15088	2.69134	4.37653	4.44485	4.58977	4.54009	4.28544	4.04115	3.17578	3.06606	3.48425
Peak_1359	Chr1	7780672	7781425	3.35298	3.19601	2.77962	4.94227	3.78028	4.22501	5.85355	5.17554	4.70027	2.97582	3.9416	4.63051	5.19952	4.68501	5.12975	3.87838	3.50559	3.65601	4.58255	3.74321	3.15677	4.55639	5.22786	4.34492	2.8908	3.34862	3.35298
Peak_1360	Chr1	7789443	7790374	3.73909	2.87839	2.64558	4.39696	4.54158	5.46224	4.04421	4.531	3.76554	4.11476	7.19245	4.4093	7.04078	7.55049	6.3247	6.03722	4.89256	5.63333	3.68089	5.05659	4.03892	5.49223	4.84318	4.68092	2.96834	3.14824	3.11649
Peak_1361	Chr1	7801967	7802510	1.80092	1.61055	2.46568	0.951826	0.800742	0.852111	1.84926	2.2451	1.23284	1.24795	2.66813	2.6077	2.2451	1.87343	2.31158	1.06363	2.00337	2.58051	2.6772	1.90969	2.49892	3.54442	2.23604	2.16956	2.37201	1.38695	2.14236
Peak_1362	Chr1	7814989	7815715	4.36836	5.20722	3.8551	3.78275	5.92623	4.80701	4.50855	5.67299	6.42366	5.05346	5.91492	5.01728	6.78091	5.67751	7.0138	4.82058	4.68039	3.94328	4.43167	5.16651	4.01564	5.6843	9.00805	6.27444	3.73753	3.80536	4.56507
Peak_1363	Chr1	7823080	7823970	1.35783	2.16405	3.01085	3.81706	1.50542	2.35222	3.29865	6.00693	5.18042	4.32624	2.77839	3.4942	4.89078	4.42956	5.5494	4.63065	5.36307	5.22839	3.47206	5.45346	5.0808	2.26551	2.5404	2.72858	2.63449	1.31725	2.5404
Peak_1364	Chr1	7835810	7837356	6.01518	8.68647	9.10831	9.18375	7.96605	8.05743	7.96287	9.10087	6.96192	4.82723	4.75498	4.93136	4.99087	7.59628	5.7081	6.34033	6.24151	6.14482	8.7906	5.6826	4.35439	4.60622	4.8368	4.2407	7.69509	7.73335	7.74929
Peak_1365	Chr1	7840037	7840862	7.33735	7.13436	7.54033	6.13336	9.42292	9.66969	7.74133	7.32143	8.77815	6.11147	7.40302	6.44978	6.3861	7.17018	5.11843	5.48062	6.77217	6.04381	6.62291	6.1652	6.32042	8.84382	9.26771	8.29258	5.07465	8.82989	5.07465
Peak_1366	Chr1	7846679	7847564	2.41745	2.41745	2.52691	3.16698	2.61782	2.48238	2.66049	2.57886	2.56587	3.29871	2.53433	1.98702	2.46754	1.98702	1.71985	2.84231	3.49723	3.54361	1.95177	2.77737	2.54546	2.43971	2.01299	2.46012	3.21707	3.12246	2.69203
Peak_1367	Chr1	7864834	7866192	3.51618	3.39281	4.30603	5.33536	4.09314	3.63956	4.99668	4.64954	6.34896	5.47204	5.35592	6.19656	6.18084	4.93499	5.68613	4.14515	5.53977	3.97219	5.61355	4.84669	5.57243	5.24343	5.92199	5.24343	5.18174	4.00968	5.05837
Peak_1368	Chr1	7873956	7874855	5.09209	3.27297	3.55789	5.21264	5.56513	5.69298	5.41172	6.05462	5.20533	2.80722	5.32039	4.09851	3.38621	3.71679	3.91221	4.4291	5.49573	4.13322	4.4711	4.34143	2.98074	4.09851	6.57516	5.70943	4.5606	4.44736	3.90856
Peak_1369	Chr1	7880455	7881299	5.49162	3.86534	4.1513	6.98173	8.14891	7.84544	6.66464	5.09477	6.35533	5.37295	9.0243	6.36895	6.22889	6.31837	5.85344	5.54025	6.12384	6.474	7.12178	4.60455	5.78925	6.225	9.88024	8.57883	4.46449	5.96627	5.77368
Peak_1370	Chr1	7882805	7883837	9.3392	8.58016	9.22145	9.75294	8.79021	10.9018	8.86341	9.85478	9.5763	8.93501	10.4404	10.1507	9.20235	9.21826	9.95184	8.71383	9.85	8.77589	8.27463	8.52924	9.12756	9.76885	12.3022	10.6775	8.37807	9.72907	7.39943
Peak_1371	Chr1	7886542	7887559	3.48457	3.21169	2.96463	2.71112	4.83932	3.42644	3.23429	3.85273	3.37639	3.15678	4.89584	5.16873	5.64023	6.19408	5.64991	4.28225	3.70095	3.6186	4.46632	4.53414	4.64879	3.76877	4.89907	3.29404	4.89261	4.51315	3.60083
Peak_1372	Chr1	7893636	7894562	3.55888	2.56764	2.17399	4.00751	3.70783	3.50923	3.8887	4.17774	3.82664	3.94013	4.36925	4.53416	3.66528	3.07124	3.79827	3.78586	4.58736	3.08366	3.9153	3.00563	3.85678	3.25566	4.21321	3.16522	2.89569	3.50391	3.34077
Peak_1373	Chr1	7896823	7897589	3.05183	2.8268	2.92753	2.23958	2.75393	3.25114	3.43117	2.83538	3.22971	3.96052	4.95279	4.08054	4.297	4.51131	3.80622	4.50488	6.20225	4.77277	4.08268	5.52716	3.51046	3.66691	3.43545	3.51904	3.84908	4.69991	3.95623
Peak_1374	Chr1	7898772	7900070	1.69694	1.2262	0.709904	1.2882	1.09712	0.931353	1.9361	1.67922	1.86777	4.78331	2.81557	3.97976	5.31479	6.96364	6.12339	5.11992	5.43754	4.51378	3.04208	4.01646	4.18097	2.65993	1.74249	2.4524	2.10567	1.67796	2.33598
Peak_1375	Chr1	7900494	7901381	1.93071	0.960728	0.960728	0.849661	0.982941	0.944067	1.53272	0.660848	1.22729	3.36347	2.68596	1.6697	4.47414	4.42231	4.22054	3.3172	4.55004	3.41345	3.77627	3.58375	3.20983	1.93997	2.61007	1.97329	3.4116	2.12508	2.92661
Peak_1376	Chr1	7903979	7904610	2.85322	1.77123	1.34468	1.85446	1.77904	1.72442	2.12236	1.98971	1.44352	3.22775	1.4045	2.00272	2.60613	2.31483	1.45912	2.90264	2.64255	2.58793	1.9585	2.46048	2.5099	2.42407	1.48773	1.81285	1.69321	2.21079	1.9715
Peak_1377	Chr1	7905748	7906767	5.3826	3.73881	2.71225	3.35365	3.8629	4.1272	2.3013	3.44551	3.27629	2.85729	5.05545	4.13848	2.43668	2.64618	2.72837	3.20861	4.29802	4.3222	7.25684	3.21828	2.18366	5.51314	4.76215	5.37455	4.94264	5.829	5.18599
Peak_1378	Chr1	7908979	7909707	5.97085	4.77578	5.70253	4.91333	5.33047	6.2031	6.6428	8.00022	6.00016	4.02491	6.67662	5.00577	4.97872	6.48045	6.158	5.86262	4.82313	5.10048	6.89083	4.73068	3.98883	7.0825	6.60447	6.57065	5.39135	5.86939	4.87274
Peak_1379	Chr1	7911880	7913164	7.90554	8.81122	8.98008	8.47351	8.8982	7.39001	7.89402	11	9.09264	8.53618	8.52339	8.40315	7.65481	8.88285	8.56561	8.35582	9.09265	7.49875	5.92147	7.17126	8.07439	8.17673	9.26022	8.76261	6.60585	8.56049	5.7411
Peak_1380	Chr1	7919085	7920232	3.81451	4.94712	7.4486	5.98522	6.5594	7.45432	6.87871	6.9861	8.10582	6.71834	6.32601	6.54938	5.81483	6.42051	5.76901	4.92707	5.40675	5.16333	5.01584	5.06882	4.18393	5.88643	4.96573	4.95141	4.52758	4.38153	4.75238
Peak_1381	Chr1	7925222	7926193	7.18735	7.56447	6.55317	9.6209	9.84582	9.22855	8.78209	8.88525	8.84804	7.24146	11.2951	8.78547	7.92638	12.1204	9.31649	9.07128	7.23808	10.6576	9.27252	9.3334	7.41227	10.4479	11.0448	10.8808	6.10332	8.02108	6.48552
Peak_1382	Chr1	7940111	7940466	1.17743	1.33442	0.757251	0.461738	0.997354	0.655668	0.978886	0.70646	0.978885	3.3476	1.1682	1.73614	2.10553	3.65235	2.77043	1.67149	2.65961	2.44721	1.68073	1.70843	2.39642	0.90039	1.88389	1.60685	2.64114	0.70646	2.23943
Peak_1383	Chr1	7949504	7950437	2.24569	1.46955	1.01901	2.78247	2.15417	1.79514	3.68005	2.24921	3.14854	2.85463	1.9993	2.65048	3.24534	3.45301	3.11334	2.6452	3.14678	2.81767	2.69271	2.80359	3.45301	2.90567	2.59064	2.42872	3.00774	2.64344	3.1415
Peak_1384	Chr1	7951966	7952793	5.36217	4.04594	4.81424	5.80289	7.82189	6.9861	7.29977	6.83919	7.28587	5.46738	5.02666	5.92994	5.56863	7.49234	5.95575	5.87238	6.71809	5.66194	6.39648	4.6574	4.86784	6.83919	6.75383	7.11316	5.96369	4.9135	3.80573
Peak_1385	Chr1	7953715	7954519	7.2245	8.67022	6.957	5.546	8.57833	7.08156	6.75077	8.6886	7.42053	6.03607	8.27407	9.22563	5.789	7.62268	5.55416	6.34237	7.86364	6.3097	8.61304	9.23788	7.47158	9.53398	9.94645	9.83823	6.39954	7.12036	6.42813
Peak_1386	Chr1	7956475	7958592	8.31751	6.61086	6.42304	6.76064	8.75988	7.97059	8.21817	7.91083	8.11416	11.1619	13.6416	13.4576	11.8263	12.2989	11.373	13.4468	13.6719	13.4972	11.9854	9.02453	8.37804	11.1961	12.5838	11.0773	10.3703	10.7661	9.97449
Peak_1387	Chr1	7963953	7964733	3.75693	3.61591	5.15236	4.40729	3.33598	4.02423	5.90375	6.67829	5.34599	9.12397	6.42782	7.40652	5.88481	6.44045	4.93768	6.32048	7.95164	5.99215	6.17315	6.45518	6.74353	4.81561	3.93373	3.77587	4.40097	3.70852	4.13367
Peak_1388	Chr1	7977177	7978716	1.52424	1.25205	0.925432	0.957454	1.48688	2.17962	4.41155	4.12975	4.28452	5.10001	3.09117	3.47864	3.53094	3.58965	3.20539	1.82525	2.11771	2.04299	2.3963	3.36336	2.7859	1.76867	0.820827	1.3652	1.48902	1.74199	1.57868
Peak_1389	Chr1	7981772	7982429	1.74122	1.96106	2.38824	1.47891	1.97604	3.42248	2.23835	3.3875	3.60234	1.95356	3.77971	2.42071	2.32079	2.82542	2.28831	2.23335	2.54562	2.05099	2.65055	2.51065	2.43321	3.00029	3.01278	1.68626	2.27332	2.41072	1.64629
Peak_1390	Chr1	7994197	7996390	10.7895	11.8834	12.1553	11.4151	13.426	13.2664	11.2892	12.1883	12.264	11.6129	14.4884	13.1855	12.763	12.6094	13.5744	11.3687	12.5285	11.6286	12.022	9.79754	10.7266	13.011	13.3766	13.1061	9.9384	11.8834	11.021
Peak_1391	Chr1	8002187	8002995	4.45591	5.13862	5.93308	4.97404	6.03467	5.27881	6.68691	4.97404	5.58156	4.90292	6.61172	6.21754	6.32117	5.46168	6.69097	6.23583	5.96356	5.88432	5.50842	5.13049	5.21786	6.54874	7.24771	6.61986	6.36384	5.48404	6.01639
Peak_1392	Chr1	8003282	8004298	4.13453	6.22765	6.65436	5.57628	8.07347	6.17431	6.74487	5.48091	6.46847	5.99328	5.35484	5.87852	5.87044	5.61021	5.06552	5.1819	5.40495	4.78105	5.60536	4.94591	5.91085	6.75942	6.02076	5.20129	3.79186	4.55315	3.88399
Peak_1393	Chr1	8006138	8007312	2.75457	3.18126	3.03856	4.93137	3.51421	3.65411	5.86868	5.90645	5.65743	5.79313	3.95488	4.98732	5.0237	6.06453	6.08831	4.42354	4.77748	4.46271	3.13928	6.40727	7.39355	3.24701	2.80773	3.2638	2.42581	2.85949	3.13928
Peak_1394	Chr1	8015182	8016090	2.86804	3.12663	3.88976	3.76137	4.09952	4.15016	3.45575	4.3545	4.33461	3.35448	3.06515	3.38342	3.49554	3.21705	2.81379	3.7252	3.1411	3.36353	2.94399	3.62031	2.78485	3.11759	2.66551	2.81741	2.30564	2.86623	2.44669
Peak_1395	Chr1	8017226	8018100	6.6766	7.71923	7.34915	7.81504	8.96663	8.83137	9.37617	8.62285	9.72747	7.47313	7.93527	8.81446	11.3187	10.2986	9.85145	8.52704	8.37863	7.8188	7.63845	7.54639	7.77559	10.911	10.3474	9.75941	7.28151	6.83253	7.08989
Peak_1396	Chr1	8029004	8030116	7.25305	8.85697	9.76083	9.3532	11.124	9.9026	9.89227	11.4327	10.4948	8.53056	9.33252	9.5895	10.421	9.32218	8.8924	10.3161	7.88221	9.05044	8.32084	6.14833	6.4954	10.1153	9.84058	8.99875	6.80407	7.76258	5.8751
Peak_1397	Chr1	8031607	8033101	3.60094	2.51241	1.86479	3.07757	4.19798	2.98301	2.71473	3.07757	3.10725	2.88955	3.15014	3.35904	2.88185	2.85986	3.35575	5.49542	5.64606	6.11226	4.1617	4.21557	4.48606	3.701	3.99457	3.81315	5.86376	3.81315	4.93466
Peak_1398	Chr1	8046024	8046889	4.93706	4.84026	3.86082	4.7985	6.39293	6.26575	7.68367	6.48594	6.4252	5.73428	6.67196	6.23538	6.96427	6.57515	6.34358	6.51252	5.93169	6.06076	5.03766	5.02627	4.43025	6.54099	7.26038	7.41413	4.93706	4.93896	3.91206
Peak_1399	Chr1	8049060	8049920	2.83511	2.51628	2.04471	1.62088	3.82023	2.75301	2.19554	2.72437	2.02371	3.2093	3.98251	3.72286	5.08601	5.04591	5.2731	1.91298	2.76447	2.36545	4.57626	2.9382	2.96111	3.0833	3.31049	3.41358	2.16117	2.84274	2.47809
Peak_1400	Chr1	8050731	8051752	5.48144	6.37411	8.1916	7.5595	7.25229	6.51403	8.30419	8.79154	8.10957	6.97243	5.34472	7.19117	7.94712	7.2153	6.89844	7.56111	5.82403	6.65075	5.742	5.41549	6.84375	6.39019	6.81481	5.50235	4.8043	4.82521	4.17702
Peak_1401	Chr1	8061791	8062742	0.968661	1.36752	1.6317	2.77994	0.906501	1.69213	4.79151	4.87957	4.95554	4.66718	1.70595	3.69852	7.4195	9.45869	7.93059	4.31495	4.14228	3.73306	3.00786	5.58404	6.12622	1.84926	1.49702	1.58508	0.954847	0.616421	0.968661
Peak_1402	Chr1	8067770	8068622	6.28417	6.70812	10.3117	7.62733	7.60613	8.32493	7.6389	8.49644	7.63889	6.39593	8.25555	6.92395	6.90276	6.20708	6.65223	7.64853	6.11651	8.09369	5.93729	5.72146	3.88304	7.49244	7.42885	7.77765	2.65357	4.93522	4.43033
Peak_1403	Chr1	8069431	8070193	2.83947	4.42293	5.19205	4.96368	4.41431	4.70085	2.74683	5.17266	4.1364	3.68183	5.30838	6.81213	5.1468	8.62612	7.25162	3.50948	3.92527	4.70731	4.90551	4.47464	5.23298	5.65739	5.85344	5.38379	3.3996	3.62581	3.15831
Peak_1404	Chr1	8071807	8072668	3.89017	4.80932	6.16898	4.95997	6.51604	6.80589	7.23877	5.34899	6.26623	6.8631	8.66707	6.84022	6.8345	7.47142	6.69338	5.34899	6.89934	7.0805	4.76546	6.7811	6.40162	7.63733	8.45731	7.94625	5.83526	6.32153	4.69109
Peak_1405	Chr1	8076574	8077496	3.23415	1.93408	1.01512	2.86906	3.13442	3.8824	2.43274	4.19763	3.34813	3.86815	2.3615	3.36594	3.23593	3.68294	4.04268	4.51107	3.39799	4.48792	3.36059	2.38643	2.86194	2.83166	5.19494	2.80673	4.16913	3.08099	4.40421
Peak_1406	Chr1	8079188	8080005	6.03459	5.73919	8.47415	6.51286	8.02602	8.6751	8.70123	8.74343	8.64094	7.11571	8.61481	8.49625	5.63269	7.10968	6.55305	5.92206	6.61334	5.95823	6.24157	5.4036	5.64072	7.46336	9.3282	6.66759	6.34004	6.42444	5.82158
Peak_1407	Chr1	8081818	8084135	7.44882	8.92596	9.9457	8.94511	8.75221	9.4032	9.15005	8.62528	7.81189	7.89415	11.1463	8.63946	8.24589	9.98612	9.09969	8.66996	8.57635	9.32733	7.97145	7.26444	7.78565	9.47554	9.72729	9.61879	6.9049	8.31681	7.13679
Peak_1408	Chr1	8089250	8090324	6.35649	5.10568	5.72956	6.62562	7.65776	8.45442	9.63796	7.79232	9.12417	7.3764	10.4499	10.1104	7.7648	8.73425	9.63948	9.5248	9.81074	8.12567	6.29838	6.68219	7.32135	9.1624	10.5355	8.65933	6.64855	9.26638	6.00479
Peak_1409	Chr1	8096921	8097655	2.96553	2.47351	2.84476	4.09941	4.11506	4.51091	3.2339	4.79047	4.10611	4.7189	4.27161	4.95596	4.66076	4.06139	5.20421	4.10612	5.42562	5.0007	4.85309	4.95596	4.20675	4.52657	4.02337	4.53552	2.73741	4.2828	4.13966
Peak_1410	Chr1	8098518	8099514	7.68805	7.08956	5.97007	7.06318	8.43163	7.45393	7.4259	7.25773	7.2874	6.03272	8.04252	6.17781	6.57845	7.54131	6.22232	7.23135	6.54713	7.47207	7.70289	5.97666	5.38147	7.25773	8.33436	6.93458	4.87696	6.22233	5.80189
Peak_1411	Chr1	8105638	8106567	2.51517	3.51559	4.86774	4.04054	3.47316	4.27915	3.02952	3.15501	2.35433	2.16344	3.41837	2.78383	2.40912	2.81918	3.37772	3.14441	3.72769	2.53285	3.79839	2.97473	3.03659	2.64067	3.3353	2.58764	2.46215	2.61415	2.35963
Peak_1412	Chr1	8111123	8112149	8.21254	6.77523	5.8549	6.4327	9.12806	8.71672	7.79799	7.42506	6.89366	8.3774	9.5122	8.78074	7.95485	8.379	7.17857	7.18657	9.02243	8.39981	7.09854	7.46507	6.60556	9.59224	10.8807	11.2648	8.84956	8.57107	6.72721
Peak_1413	Chr1	8117309	8118931	7.2031	7.48972	7.26893	7.36008	9.36037	8.58558	8.30605	7.74191	9.02412	7.02484	10.2557	7.83306	6.61162	6.41918	7.77026	8.40024	7.54138	8.86208	7.1879	6.37867	6.45665	9.78272	9.76044	10.2628	7.21525	8.73548	7.75811
Peak_1414	Chr1	8122238	8123083	4.29989	5.54924	5.25196	6.11078	5.84652	6.96958	6.20598	7.0784	6.78111	5.98059	9.5635	7.56803	6.77917	6.82774	7.24549	7.56998	5.41906	6.58681	4.98771	7.30378	6.67619	6.7442	6.90158	6.37114	5.47541	6.01751	5.10429
Peak_1415	Chr1	8126567	8127247	2.74689	3.27792	2.61896	5.48171	2.75896	2.78309	3.52654	4.1493	3.51206	3.9924	3.43964	3.44206	3.33103	4.02137	3.77033	5.36826	4.95792	3.24654	3.81619	5.04723	5.73033	3.8162	3.26827	2.21586	4.43171	2.33896	3.9393
Peak_1416	Chr1	8129556	8130516	6.31516	5.60188	6.03293	7.53475	5.37609	6.47936	7.89566	7.93329	7.40987	7.94184	9.07248	6.81804	6.75476	8.2292	7.65619	7.10541	8.96301	7.65619	6.41779	6.56831	7.67329	6.29121	6.15437	6.45542	5.30254	6.62989	5.30767
Peak_1417	Chr1	8131541	8132310	3.89813	3.72094	4.16071	4.47239	4.80114	3.92801	5.45653	5.40529	4.47452	3.73588	5.65719	5.26012	4.13722	5.40742	5.93044	4.01768	4.58126	4.0988	4.03475	3.56296	4.91215	7.20278	6.42359	5.75967	2.60444	4.9826	3.59285
Peak_1418	Chr1	8135181	8135972	5.00608	5.50005	5.82175	5.38175	6.52741	4.78815	6.4278	8.60914	6.95704	7.83912	8.91838	8.82498	7.4863	8.12554	6.05213	7.39082	7.0795	6.5378	5.53118	7.88894	7.4178	7.27045	6.46723	7.06082	4.80061	7.12724	5.18665
Peak_1419	Chr1	8152899	8153461	3.57371	2.34452	1.8978	2.69196	1.44817	2.82918	3.00437	3.29342	3.74013	1.51824	1.88612	2.49926	2.38247	2.02627	2.15473	3.26714	3.49196	3.25254	2.87882	4.02042	1.85109	2.69196	2.39707	2.96933	2.84962	2.3124	2.8175
Peak_1420	Chr1	8156542	8158163	8.63952	10.4363	9.42088	9.65498	10.3188	11.8521	8.46622	7.73452	8.82497	8.88983	10.3928	10.6451	7.57035	8.41352	8.2767	7.4011	8.32029	7.8987	9.74517	7.28151	6.52448	9.25873	9.90124	9.27494	7.5977	9.08644	9.11887
Peak_1421	Chr1	8164955	8165588	1.14858	2.90904	3.04127	2.33864	1.58675	1.45452	2.38272	2.77681	2.54087	3.74908	3.15275	2.46568	2.7457	1.32229	2.11566	2.38012	2.56161	3.1372	2.24789	2.38012	4.2754	1.85121	1.85121	2.24789	3.04127	1.29896	2.91163
Peak_1422	Chr1	8168569	8169142	1.91012	1.61802	1.46051	2.13635	1.28296	2.28527	3.73432	2.62892	3.8231	4.65358	1.76979	3.72	2.88379	2.76351	2.23085	2.52582	2.46282	2.20508	3.11575	3.86892	1.65524	1.82993	0.876306	2.04758	5.37238	3.34199	4.77959
Peak_1423	Chr1	8181704	8183657	6.6862	6.77032	6.82669	7.62082	7.2288	7.5409	10.6215	10.7258	10.7687	12.6077	8.881	10.7805	12.288	12.3982	11.059	9.25872	10.8436	9.8703	7.80841	10.1723	14.1775	7.53333	8.9727	8.42841	6.63151	6.27147	7.79748
Peak_1424	Chr1	8188129	8189031	3.43321	2.878	2.13529	2.70142	2.97083	3.01816	1.81308	1.67109	2.40106	1.71478	3.34947	1.90046	0.879236	1.25605	1.39622	2.77241	1.8058	1.85677	5.20078	3.01816	1.11406	2.8962	3.83369	3.89922	4.63828	2.97083	3.80638
Peak_1425	Chr1	8195857	8196172	2.91825	1.85707	1.69581	1.43051	1.61258	3.12632	2.40846	2.12236	0.816692	1.42531	3.05349	1.13921	2.25761	1.52935	2.17958	1.1028	1.90388	0.795885	2.68416	1.15481	1.63338	2.45008	1.82585	2.54371	1.6802	2.45528	3.83377
Peak_1426	Chr1	8202732	8203322	2.34469	2.01649	0.597994	2.25291	1.85517	2.69514	2.37807	2.5533	2.13887	4.92302	2.42535	3.12626	1.9859	2.41145	2.86203	2.20284	3.48227	2.79806	3.80491	3.23195	4.36396	2.12497	2.40588	3.05672	2.12775	3.18745	2.8815
Peak_1427	Chr1	8212588	8213303	3.24396	3.30135	3.41844	4.10947	4.63061	4.09569	4.51812	3.87301	5.23441	4.72015	5.0186	4.25181	4.49287	4.59618	5.20915	4.40104	4.63062	4.72475	2.64705	4.96121	4.30232	4.23574	5.2413	5.03468	3.51256	3.51027	3.27839
Peak_1428	Chr1	8215916	8216698	4.1924	4.72773	4.64795	4.5136	7.02441	6.79768	6.70741	7.88095	7.09159	5.64094	5.07832	5.94955	6.88166	5.91596	5.23997	5.61156	4.52199	5.17489	5.56537	5.57376	4.4947	5.68713	5.52758	6.24346	5.74171	5.42051	4.38973
Peak_1429	Chr1	8219718	8220545	3.61514	3.22604	3.50993	5.64804	7.13102	5.35025	5.55077	5.50113	6.38457	3.26971	4.75071	5.27878	4.33976	4.82416	5.17753	3.64492	4.92938	3.70051	3.99432	4.37549	4.4152	6.17612	5.2768	6.08083	2.8945	3.59926	2.73369
Peak_1430	Chr1	8234116	8234902	2.87611	4.99403	5.37208	4.87288	4.47394	3.53822	2.6568	3.17688	2.76958	1.79208	3.28131	2.27666	3.15181	2.87611	2.76958	6.1052	5.81697	6.66497	4.78724	3.60505	3.66771	2.13045	2.803	2.86775	3.85152	2.02393	4.01652
Peak_1431	Chr1	8242417	8243251	5.58495	5.74637	6.75036	5.31918	5.83299	6.02394	6.20899	6.09088	6.52003	3.79351	5.27981	5.92551	5.41564	5.72274	6.10859	4.51796	4.62033	3.78957	4.5337	5.83102	4.98648	5.37824	5.93733	6.86454	3.47066	3.30923	4.40968
Peak_1432	Chr1	8244283	8245066	3.49515	2.56632	3.97948	3.85578	4.88524	4.30027	4.24785	6.46823	4.46171	6.35919	5.70503	8.25878	6.07615	3.95641	4.87895	3.5224	5.00475	4.30237	6.33194	5.67358	4.36317	6.14324	6.18308	4.95862	3.95641	6.16421	3.9669
Peak_1433	Chr1	8258020	8258841	4.6354	4.30345	5.30332	6.76913	6.25519	7.34305	5.81725	4.50542	4.17546	3.56954	7.46704	5.28132	5.18133	5.16333	5.12534	4.96536	5.20133	4.87937	6.06322	5.25332	3.93349	5.29132	7.44504	6.66114	4.07747	5.23933	4.07947
Peak_1434	Chr1	8262167	8263813	7.38956	8.56227	8.32075	8.04928	9.20601	9.64415	10.0893	8.27883	10.1082	7.31371	10.76	7.84966	7.64706	7.88858	8.03031	7.58119	8.05227	7.40154	8.3906	5.91943	6.90251	10.8448	10.1821	10.262	6.71887	7.29375	7.48238
Peak_1435	Chr1	8269306	8271930	7.016	9.3123	11.1853	10.7426	10.571	10.286	8.59028	9.04616	9.16138	6.53069	7.89018	7.79249	8.11186	7.56894	8.4475	10.0068	9.47887	9.93537	4.91446	5.96898	6.83565	8.43123	7.51822	8.91591	7.06672	5.86128	6.47496
Peak_1436	Chr1	8281390	8282290	3.13798	3.81483	4.28005	4.32019	5.11198	5.19773	5.57721	4.86934	6.15189	3.27663	5.49328	3.80388	4.28005	5.52065	3.95348	3.77469	4.38222	3.24014	4.22897	5.00069	5.3601	4.24357	3.78746	4.88941	3.83307	2.56329	3.96443
Peak_1437	Chr1	8296242	8297013	7.02443	5.67022	4.99524	5.62976	6.8626	7.43537	5.15068	5.2465	4.84832	5.21455	8.51916	6.16633	6.94778	7.22032	6.67948	6.80512	5.74262	5.80436	6.44952	6.00664	4.85897	8.09971	8.31476	8.13803	5.11235	7.60146	5.81501
Peak_1438	Chr1	8309266	8310765	9.077	8.39976	9.35754	8.58058	8.6255	9.02659	13.364	10.7701	11.443	14.9596	10.3624	13.5251	11.7345	11.7706	11.8725	12.347	14.256	14.3207	11.9218	14.1541	13.8319	10.9871	11.7388	9.83972	13.2456	10.9422	12.1717
Peak_1439	Chr1	8313712	8314946	8.89243	8.20963	8.69278	11.3122	10.254	13.3992	13.4405	11.6689	12.8974	12.0828	14.0487	12.2492	12.6978	12.4023	13.0079	12.3451	12.6046	13.4817	9.56192	11.2124	11.2896	10.7279	13.7799	11.022	8.82454	10.0464	7.3844
Peak_1440	Chr1	8321624	8322308	5.23373	4.62901	5.11374	5.97283	7.45104	7.24226	7.52543	7.84219	9.71875	5.26252	7.40064	6.47676	5.36091	7.07429	6.85352	6.29679	5.09455	6.81033	4.92416	6.10241	5.36571	6.18641	8.5285	6.76713	5.37771	6.27519	5.30571
Peak_1441	Chr1	8329877	8330646	3.59285	3.9024	3.9024	3.58645	4.19273	4.81822	7.18357	5.47574	6.71605	4.76912	5.69775	5.38821	4.12015	5.77034	4.42542	3.93655	5.69562	4.79047	3.59712	4.96552	5.06159	4.89934	7.05762	5.48214	2.50411	4.65171	3.54162
Peak_1442	Chr1	8333730	8334898	1.81675	2.24	1.97986	1.58332	2.7898	2.20203	1.81112	1.41599	1.38646	2.13594	2.79683	2.59575	2.42561	1.38084	2.29483	2.00798	2.0797	1.23179	2.02204	1.63957	1.50599	2.20344	2.29484	2.21609	2.27093	1.88002	2.39467
Peak_1443	Chr1	8336583	8338052	5.47259	7.65089	7.42724	7.36127	8.92454	9.79675	7.64194	8.6886	8.1552	8.21111	8.06239	8.78252	7.04481	7.20136	5.88409	7.46191	7.3758	6.3817	5.94783	5.89751	6.0563	8.28492	6.725	8.03332	5.3384	4.27721	4.87769
Peak_1444	Chr1	8350695	8351944	4.6197	4.97739	4.33434	5.92422	4.05555	4.90112	5.83479	5.10495	5.76246	4.71833	4.31593	5.95051	3.78466	3.42039	3.75573	4.9866	5.15755	5.13783	4.42639	3.54795	4.3488	5.73485	4.70255	5.07734	4.39352	4.76173	3.60581
Peak_1445	Chr1	8385151	8386465	7.20392	7.71393	9.00021	9.43522	10.7852	10.5265	9.07522	10.7465	10.5502	7.61517	7.04766	8.4877	8.54895	10.4777	8.38644	9.29522	9.84398	9.49898	7.65268	5.80013	6.12014	9.16272	6.03389	7.62393	7.90518	6.86016	6.6664
Peak_1446	Chr1	8398254	8399887	6.77233	10.5921	12.6483	11.2419	11.424	12.6282	10.7782	11.8023	11.5196	8.96237	7.95235	8.23403	6.31058	6.05405	6.61841	9.44022	9.69675	9.95025	6.79848	8.15757	8.46541	9.18369	9.54283	8.82455	9.16356	8.06402	8.60926
Peak_1447	Chr1	8400148	8400669	1.75715	2.02482	1.46115	2.409	3.28758	1.61545	3.82921	2.98212	4.15041	1.4328	3.34111	3.18366	1.95869	1.82328	2.84041	1.30055	2.0878	2.30193	1.7666	2.19802	2.61054	2.78373	1.83273	1.4328	1.81069	2.16653	1.25961
Peak_1448	Chr1	8407633	8408625	6.52715	7.07177	7.58162	7.27041	7.17771	8.23384	8.21729	9.30487	10.3279	8.64768	7.97229	9.0218	8.79833	10.558	9.40088	8.8215	9.07643	7.8349	6.75393	8.68907	8.72383	8.51195	9.47372	9.90743	9.03338	8.52684	7.34821
Peak_1449	Chr1	8420180	8421158	4.18419	3.43869	3.66033	5.64664	6.26956	5.38471	6.05801	6.52311	7.48016	5.73731	6.84548	6.90592	6.48113	9.35901	6.76488	6.54157	6.47441	6.60706	6.45594	6.75481	5.83133	7.43483	7.37103	6.3955	2.9971	5.02707	4.86588
Peak_1450	Chr1	8423359	8424001	2.40049	2.05793	2.57433	2.29312	1.49551	1.45206	2.6817	2.40816	2.66381	4.02894	2.72772	2.97313	2.44395	2.36726	2.26756	2.86577	2.77373	2.08605	3.88578	3.3157	3.05238	3.75285	3.14186	4.35106	1.32423	2.47719	2.90155
Peak_1451	Chr1	8424643	8425272	2.46307	2.75269	2.79183	2.62745	1.5629	2.30391	1.46375	1.70641	1.33069	2.64311	1.28111	1.57073	1.72989	1.52637	1.12195	1.75337	1.90471	1.50289	1.26546	2.00907	1.16631	1.20805	1.46636	1.86818	2.5283	2.1291	2.10561
Peak_1452	Chr1	8428647	8429443	6.88246	6.45759	6.26785	6.8474	7.97351	7.51564	6.81028	7.97351	6.04922	4.77874	7.08046	7.32383	6.60403	6.26578	7.52389	6.8474	5.75842	4.40544	7.16295	5.34386	5.78523	6.82265	8.34888	5.74192	4.94374	4.52506	4.72718
Peak_1453	Chr1	8432133	8433058	6.10297	5.71421	4.82841	4.80178	7.42012	8.17456	5.17634	5.9503	6.2077	2.53491	5.16036	4.36509	4.66864	3.9355	3.81835	2.87219	2.99468	3.79172	5.58639	3.36746	2.71598	4.93847	7.4219	5.04143	5.70355	7.75031	6.15622
Peak_1454	Chr1	8436100	8436970	4.65772	4.59921	5.18237	5.69381	6.21469	5.95047	6.82993	5.39752	6.36001	5.42771	4.58222	5.90707	5.80139	4.78793	5.17293	5.43904	4.27649	4.8087	4.73509	5.37487	5.16727	6.71481	4.18591	6.88278	5.52962	5.67872	5.65795
Peak_1455	Chr1	8441020	8441865	4.68849	6.37697	7.14252	5.16259	7.46505	7.96052	8.22866	6.5363	8.41324	7.74096	8.51039	7.23189	7.20469	6.63927	7.54666	6.1166	6.7306	5.39186	7.96829	6.46829	6.25844	7.03176	8.24615	8.11208	4.96439	4.8109	6.64704
Peak_1456	Chr1	8470933	8471467	2.19377	2.48258	1.0723	2.29209	3.24149	2.1231	3.03871	2.50716	4.05263	3.17697	3.84984	3.0387	2.61163	2.14768	3.0172	2.1569	3.43506	2.65157	3.11244	3.06021	3.43813	2.61777	3.76074	2.246	2.03707	2.35046	1.65301
Peak_1457	Chr1	8479643	8480460	4.34258	6.33401	5.37748	6.19335	6.63142	5.78742	7.55379	7.10165	8.15865	6.45056	7.14585	6.8183	5.95823	7.58192	6.57113	7.02328	4.65405	6.60128	6.55707	5.69096	6.72386	8.43396	6.89266	6.83438	4.06526	5.87182	4.63596
Peak_1458	Chr1	8483320	8483919	3.31497	3.24648	3.35333	5.14506	3.79441	4.11221	5.14506	3.34511	4.63822	3.55058	3.49305	3.8492	4.76973	4.82452	5.14232	4.4848	3.84647	4.01906	2.66842	4.36974	4.27659	4.06838	5.78888	4.75877	4.4711	2.64102	3.75606
Peak_1459	Chr1	8485068	8486123	4.02075	5.60538	7.56983	8.07729	8.00413	7.82511	6.15954	6.98299	6.28095	5.74236	9.28833	5.81552	6.55959	6.81643	7.2336	6.63742	7.02346	7.21648	6.70279	7.57139	6.66855	6.93006	7.19002	6.351	6.58916	6.45841	6.27005
Peak_1460	Chr1	8500508	8501438	1.52549	0.967558	1.43191	2.18936	2.41889	2.71552	1.25006	1.27301	1.00287	1.45487	2.32708	1.5714	0.900464	1.08056	1.03465	1.26065	2.48069	1.94041	2.07283	2.16111	1.53962	1.98102	1.47782	1.53079	1.80093	1.17237	1.44074
Peak_1461	Chr1	8505805	8507769	5.84235	7.79315	7.32385	6.18617	8.23985	7.83832	8.24571	7.66683	8.24571	7.35731	9.00695	8.43393	7.29541	8.23316	8.07004	8.02403	7.21008	7.78311	7.12559	7.27784	7.59405	8.37036	9.69877	8.34526	5.3329	6.50656	5.20491
Peak_1462	Chr1	8520517	8520823	0.776382	0.631815	2.20064	2.24883	1.05481	2.38269	2.16316	4.49766	3.52317	1.32253	1.47245	1.19938	1.52064	1.71339	1.65985	2.18458	2.18458	0.610397	2.16851	2.25954	2.8271	1.08158	1.14048	1.9008	2.7093	0.62646	2.98238
Peak_1463	Chr1	8523205	8523798	2.60958	2.10316	2.28581	3.14644	2.17235	2.51273	2.05612	2.68153	1.86794	2.83097	1.98417	1.98417	2.60128	1.6936	2.39373	2.06996	3.46745	3.39827	2.70644	3.65563	3.50343	2.9638	1.84027	2.96934	3.47575	1.41133	2.68153
Peak_1464	Chr1	8525817	8527147	3.232	4.79305	6.89873	6.62703	5.82921	5.30063	5.9663	7.15561	5.77734	7.42977	6.24788	6.00952	6.7814	6.47141	7.1803	6.88885	7.22724	6.2627	4.84121	5.80327	6.26393	4.99682	5.34386	5.55381	4.75105	2.82075	4.84985
Peak_1465	Chr1	8531387	8532308	5.43057	7.20272	8.55769	8.29382	9.73971	10.5188	10.1765	10.025	10.6347	8.6076	9.25121	6.71956	9.10324	10.0802	9.06579	9.77716	9.01588	8.73241	7.20806	7.05474	7.35782	9.09611	10.4225	10.6686	6.17401	8.24212	6.21502
Peak_1466	Chr1	8536184	8537415	3.87865	5.19421	5.4664	4.08946	4.58579	4.85531	5.90803	4.89934	5.64785	5.11549	5.08747	4.16684	4.00807	3.48371	3.84929	6.9861	5.25959	6.14553	4.49373	3.98805	3.67451	3.56377	3.2729	3.1755	5.64785	5.10348	4.6952
Peak_1467	Chr1	8542654	8543263	1.64109	1.91596	2.3013	2.33634	1.31503	1.33389	2.9696	2.68126	3.37381	2.20429	0.716799	1.50636	1.86206	1.73271	1.51714	3.67293	2.54922	2.72168	1.79739	1.45246	2.12884	0.918905	0.894652	1.23688	1.97793	1.9941	1.51983
Peak_1468	Chr1	8544366	8545415	2.34984	2.58936	2.87428	2.20581	1.83635	2.21677	4.51651	3.44883	4.52746	2.65981	2.8461	2.82262	2.74278	3.66956	4.20497	2.95412	2.44064	2.95412	3.32515	2.60188	3.21556	2.23555	1.96942	1.96785	1.43714	3.03396	2.39523
Peak_1469	Chr1	8549290	8550971	5.51871	4.62059	4.25802	6.04156	6.45397	5.74642	5.66628	6.17252	6.17056	5.76596	6.57808	6.7364	6.08065	6.37969	6.64942	6.98366	5.69072	6.38947	7.85637	6.66408	5.80212	6.08749	5.92331	5.86565	6.07381	6.20477	6.11094
Peak_1470	Chr1	8555390	8556529	8.04591	7.59748	6.91257	8.77408	9.75458	9.7964	7.6739	8.39486	8.00121	7.13029	7.95651	9.136	8.70343	9.26577	9.12014	8.43523	7.88009	6.85777	8.01563	6.7799	7.74166	9.14322	8.93558	9.35518	4.89387	7.94786	6.14546
Peak_1471	Chr1	8557230	8558907	8.5383	9.41799	11.341	10.2918	11.8366	11.8866	9.72657	9.74224	11.0255	7.47639	12.202	10.5191	10.4525	11.5526	11.5937	10.6807	11.676	10.7356	10.043	9.03006	8.65976	11.1372	13.1836	11.3302	7.64391	8.10237	9.04279
Peak_1472	Chr1	8562445	8563537	5.76454	5.44571	6.31498	8.47311	7.75723	7.5903	5.44571	6.93309	5.75251	7.5151	9.64165	8.04749	6.34656	7.15266	7.08498	5.16448	7.82341	6.90752	7.5903	7.98433	7.26846	8.18586	6.58568	8.28963	6.67291	6.51951	7.07897
Peak_1473	Chr1	8569729	8570678	4.73411	4.46938	4.32403	5.27051	5.99204	5.2705	6.11836	5.29127	5.87265	4.90195	6.2239	6.23082	4.91579	5.7273	6.8918	5.03519	5.45392	5.0075	5.94532	5.96435	4.37594	6.08029	6.09413	7.04407	2.9121	5.293	4.3396
Peak_1474	Chr1	8574749	8575168	2.99404	1.60856	0.410947	2.11736	2.63397	2.34827	2.7827	3.76115	2.6418	2.69268	1.89036	1.32677	1.99994	1.91775	4.39909	2.39524	1.19762	1.74555	2.99404	1.93732	3.45978	1.12717	2.01951	2.55179	1.29938	2.14867	1.52246
Peak_1475	Chr1	8586299	8586931	2.11901	2.38388	1.62042	1.85673	2.88767	2.14757	3.73423	3.26161	3.09022	5.01966	4.49769	5.05341	4.9002	4.27177	4.45355	3.87446	5.73638	3.70826	3.17851	4.58079	4.14972	4.27697	3.79136	3.91082	1.73987	3.17851	2.11901
Peak_1476	Chr1	8600399	8600878	1.11641	1.39722	0.873263	2.56157	2.04104	2.34925	3.10608	4.54097	3.85605	1.92118	1.57187	1.90405	2.79444	2.82526	3.11292	1.82529	2.09583	2.92115	1.9383	1.7431	3.6814	2.27048	2.02049	1.74653	1.90748	1.84584	1.62666
Peak_1477	Chr1	8606515	8607581	7.5072	8.48546	9.70251	9.97828	9.59621	9.58388	9.50686	11.2369	9.66399	8.9122	10.4543	9.33123	9.19259	10.6068	9.37128	11.431	10.8811	10.3834	8.93838	8.09261	8.27132	10.8626	12.8869	12.4262	6.43034	9.37283	6.90175
Peak_1478	Chr1	8609345	8610250	2.82492	2.01936	1.69278	2.23526	2.74509	2.22075	2.6707	1.77442	2.57817	1.2029	2.37134	2.38948	2.93197	3.58331	3.97884	2.33324	3.12066	2.40581	4.10766	2.14817	2.73057	3.50167	3.33656	3.7085	2.59087	2.69248	3.29846
Peak_1479	Chr1	8613587	8614387	3.24038	2.84636	2.9305	5.18378	2.98591	3.76984	3.77599	5.23304	5.17557	5.66809	3.64465	4.15564	6.35968	4.79182	5.42388	5.10785	6.68187	4.62559	5.91846	5.06475	5.02371	3.98121	3.32862	2.65961	4.82875	5.11811	4.13923
Peak_1480	Chr1	8619827	8620782	8.15533	8.51985	9.39504	10.1636	10.2101	10.2101	9.29188	9.41052	10.3854	8.93595	11.491	10.8531	7.95071	7.97994	9.74924	9.03224	9.07351	8.70211	9.93322	8.4545	8.84138	11.0853	12.3525	12.2321	6.049	8.75713	7.61713
Peak_1481	Chr1	8623957	8624872	5.73711	5.31001	6.11576	5.79454	6.71512	7.00404	8.04488	8.45403	7.77928	6.24496	7.44011	6.56438	8.68552	7.09915	6.83895	5.70301	6.81203	6.12293	6.0027	7.48677	6.18753	7.09557	9.45179	7.56215	7.04711	6.22343	6.72948
Peak_1482	Chr1	8631363	8632239	2.76277	4.25098	6.99688	7.11309	8.48884	7.08122	7.71475	8.40263	6.93502	4.71769	3.90798	4.73643	5.39995	5.45992	6.5714	4.79829	3.59122	4.40281	3.21823	3.42065	4.71769	2.96332	3.68306	2.77214	3.44877	2.23795	2.7384
Peak_1483	Chr1	8635095	8635921	5.61711	5.19175	5.19771	7.70414	5.65487	5.79003	6.95281	6.5036	7.47556	6.07426	5.44219	6.36446	4.92938	4.85583	6.79181	5.4899	5.26728	4.99895	3.6374	5.73239	6.3426	5.48592	4.97907	5.5217	4.69086	4.10252	5.3766
Peak_1484	Chr1	8639764	8641549	6.59724	5.90604	6.89545	6.25118	8.41682	7.02153	7.65107	6.45643	6.36899	7.46331	9.11262	7.88668	6.83286	7.74587	7.7339	6.63406	7.65476	6.77764	7.26727	5.5655	6.2429	8.33675	9.38782	7.8692	6.43065	6.40397	5.25718
Peak_1485	Chr1	8661937	8662870	6.65259	6.68075	5.54735	5.46815	6.00141	7.11369	7.58184	7.88983	8.13446	6.3798	6.30236	4.89616	6.85675	5.95213	6.92714	7.2193	5.44175	5.38543	6.33052	5.52974	6.54875	5.52271	6.77227	5.11616	3.89828	6.74235	3.45477
Peak_1486	Chr1	8664035	8664798	4.13314	2.6335	3.64904	4.25148	5.33801	4.87542	6.02866	5.50583	6.41163	4.43005	5.26916	5.16588	6.32558	5.87159	4.93782	5.60911	5.09489	4.81088	5.6005	5.85008	5.67365	5.29928	5.92323	4.99376	3.7308	4.12023	4.4989
Peak_1487	Chr1	8665743	8666596	5.37022	5.87645	6.76764	8.6501	9.05238	8.17082	8.86953	7.80319	7.73581	7.46056	8.1535	7.38742	7.59916	8.79638	7.12372	6.19404	5.52613	6.14015	7.47019	6.88697	7.22574	8.18622	7.97642	7.22959	7.56643	7.06791	7.36817
Peak_1488	Chr1	8682160	8683067	6.07188	6.37964	6.09361	6.0393	6.87748	7.90575	6.7399	7.91843	6.70187	8.42713	8.8598	7.73196	6.53171	6.50093	7.29205	6.3036	7.46584	5.96869	6.5661	6.8467	7.08205	8.19541	9.97497	8.17731	5.85464	7.15628	7.20153
Peak_1489	Chr1	8687364	8688355	7.48653	8.81714	11.6325	8.30677	9.34739	10.1593	9.17672	10.4228	8.09963	9.25293	12.108	10.7824	10.4311	10.847	9.96049	10.0831	12.2025	9.48327	7.98861	7.38545	7.09878	11.2596	13.5994	11.3657	6.91982	7.62407	6.52544
Peak_1490	Chr1	8693209	8694175	2.9408	2.25405	1.71348	3.57656	3.29438	2.46653	1.64719	2.34074	1.92087	3.04109	3.34707	3.12099	1.82058	2.08066	1.04033	2.51413	2.8983	2.30334	5.35633	3.30117	2.51413	3.30628	2.9782	4.25991	5.01636	3.58676	4.75798
Peak_1491	Chr1	8702256	8703416	9.58098	8.73148	8.95235	8.42141	7.3397	9.3148	10.1813	9.47763	9.32896	11.8392	11.314	10.582	9.3148	10.1954	9.78061	11.6736	10.4956	10.817	9.83158	10.5522	10.4461	9.97317	12.1521	9.404	9.53142	9.96467	8.66493
Peak_1492	Chr1	8710077	8710878	3.11336	3.34497	3.13591	3.77744	3.33267	4.39846	2.85306	3.6975	3.48024	2.51897	1.24206	1.89179	0.627181	0.627181	0.522651	2.1316	1.35889	2.1316	1.66428	1.56795	1.77906	3.32857	1.98607	3.34497	4.12997	3.61347	3.74464
Peak_1493	Chr1	8722031	8722846	6.34551	8.33175	9.36919	7.26208	9.90704	8.43851	8.91997	8.42442	9.14961	8.15045	9.75798	7.29229	7.38496	9.44977	7.95505	8.16657	8.41838	7.37086	8.09404	6.26694	6.72221	8.2552	9.35308	7.79793	6.78062	6.79674	7.19157
Peak_1494	Chr1	8725877	8727207	4.5127	4.81898	5.15861	5.65014	5.11785	5.21294	5.78475	6.9543	5.84032	7.62737	6.13055	7.5755	7.48165	8.10779	5.25123	9.29957	6.94566	6.99135	5.41054	6.97159	6.67642	5.85762	6.92837	5.60568	5.17713	4.06686	4.6609
Peak_1495	Chr1	8741837	8742832	7.85091	8.6464	9.13491	9.59372	10.8183	9.06559	10.5741	11.8267	9.42867	11.4124	11.5956	10.5542	10.6962	10.6599	11.0428	10.2456	11.2375	9.94525	9.28839	9.49799	9.64818	12.1155	13.3682	12.8631	6.32264	8.33282	6.96959
Peak_1496	Chr1	8755938	8756707	3.59285	4.50227	3.91094	5.77888	7.11098	5.72977	6.27415	6.08629	5.33057	5.70843	5.56113	5.2836	4.55991	4.94417	4.29306	4.2461	5.45866	5.40743	5.20035	4.92923	5.66146	4.8844	5.50136	5.06159	4.38699	4.82249	3.59712
Peak_1497	Chr1	8762578	8763482	3.24217	4.7243	4.63167	4.9241	5.91582	5.14751	5.92127	5.8795	5.60159	5.83772	7.8593	5.558	7.03469	7.65042	7.78302	7.50694	6.81128	7.73761	4.96587	5.2801	7.99553	5.60705	6.20644	5.91219	3.99595	5.04398	5.01128
Peak_1498	Chr1	8838657	8839615	3.96806	6.54259	6.31976	6.55287	6.66257	6.61629	6.18949	4.53713	5.61185	4.55941	3.21216	4.72053	5.92724	5.40959	5.557	3.80008	4.13261	4.06234	3.84465	4.15661	4.05033	4.53885	4.02463	5.46101	3.21558	3.58411	3.40927
Peak_1499	Chr1	8841358	8842369	1.4911	1.46674	1.69414	0.924225	2.00601	1.95403	1.54471	1.28482	1.16624	1.63567	1.40826	1.14188	1.73962	1.98976	1.72338	1.42938	2.11159	1.82246	0.86575	2.56964	1.5642	0.821894	1.4911	1.24259	1.40014	1.76561	1.73962
Peak_1500	Chr1	8849336	8850201	1.01361	1.54888	1.16166	1.0174	1.68744	1.84309	1.04208	1.8393	1.04018	2.12402	1.37805	1.35527	3.00665	2.36508	1.98166	3.18318	1.98356	1.9342	2.42013	1.65707	2.02342	1.9361	1.60772	2.09175	1.71212	1.56597	1.66846
Peak_1501	Chr1	8855235	8855950	5.47088	5.20686	5.48924	6.67387	5.2413	5.76244	6.116	5.09437	5.93462	4.07274	5.40659	4.25181	3.65261	5.73719	4.80969	4.11177	4.20819	4.08881	5.52368	3.62965	4.68342	5.65684	3.54241	5.01172	3.45517	5.7877	4.2013
Peak_1502	Chr1	8860684	8861467	1.53057	2.4552	1.49702	2.40698	3.7132	3.02759	3.29387	3.10936	3.32951	2.13231	2.1386	2.65858	3.11355	2.01909	3.15549	2.30424	1.68782	1.77169	2.91227	3.72578	2.81583	2.98356	2.06103	2.79486	2.53278	2.65648	1.87442
Peak_1503	Chr1	8863841	8864923	9.36641	7.33861	7.27942	7.66646	9.1448	9.8779	8.15064	8.28269	8.47848	6.96675	10.6368	9.07802	8.011	8.2068	7.97305	7.3204	6.17294	7.66343	7.02139	6.81193	6.5023	11.1999	11.634	10.9616	6.51899	7.30978	6.47194
Peak_1504	Chr1	8867043	8867775	3.32122	3.80112	2.06315	3.87288	2.85925	3.54547	3.33243	3.77421	3.1149	6.16476	3.64863	5.57273	4.70038	4.81475	3.77421	2.709	3.2046	4.8753	4.20029	4.00295	2.99604	3.65984	4.52098	3.73385	3.37952	2.40177	3.04762
Peak_1505	Chr1	8877773	8878731	3.76752	2.75108	1.22041	2.72708	4.10861	2.55738	2.95162	3.40928	5.21247	5.0702	4.46857	5.65984	3.82922	6.38146	5.55871	4.6554	3.68524	4.0212	5.11134	3.94063	4.19603	4.80795	3.09903	4.49257	2.23857	3.91835	1.89576
Peak_1506	Chr1	8893531	8894886	4.56406	3.97613	4.69862	5.45869	5.4405	4.82226	5.47081	4.22342	5.65385	4.73741	4.52648	5.01501	5.37504	5.50233	4.75438	4.08038	3.69246	4.11311	4.25736	5.49263	4.9447	4.94591	4.84166	4.13857	4.28161	3.64761	3.60033
Peak_1507	Chr1	8898068	8899170	2.64377	2.6855	3.65866	4.15046	3.49622	4.51408	4.09979	4.01633	3.77937	5.72867	5.0178	5.6929	4.57072	4.13257	4.65864	5.77636	6.01034	5.4634	5.09679	6.94772	6.30839	4.681	4.51409	3.95225	5.47234	3.11619	4.19069
Peak_1508	Chr1	8902533	8904246	6.21168	5.95562	5.07522	6.84752	9.2125	6.78902	8.58721	7.93603	9.77545	6.15222	7.45938	7.5409	8.69175	8.81066	6.95397	7.53707	7.51118	6.16852	6.66338	5.77436	7.10646	9.16935	7.78642	6.88492	5.08673	5.42911	5.16537
Peak_1509	Chr1	8907539	8909194	7.60054	8.19016	8.36585	9.28205	9.6513	9.55601	7.08735	7.59359	7.09926	5.96866	8.37974	7.29282	7.86358	8.90683	7.97376	10.5824	9.41605	9.70689	7.39307	5.82175	4.98894	9.46668	9.2612	9.65329	8.39563	7.57969	8.09486
Peak_1510	Chr1	8911408	8912389	4.25008	5.29126	8.42484	7.09072	6.96517	6.94843	6.50653	7.79544	6.48978	2.91429	4.15634	4.25343	3.72112	4.01573	5.61097	3.29427	4.14128	4.05758	4.84599	4.4091	2.46736	3.58554	2.75192	3.41982	5.7633	4.95815	5.462
Peak_1511	Chr1	8915930	8916782	6.39787	5.92573	4.48236	5.52105	6.90083	7.58879	7.63119	6.35162	7.319	4.27616	5.40349	6.25333	4.69048	6.8565	5.8236	5.19345	5.10866	4.07575	7.67358	6.28416	4.5209	5.81589	5.83709	6.78328	3.83294	5.78699	3.63637
Peak_1512	Chr1	8922780	8923479	3.29697	3.05745	2.03595	1.36434	3.14433	3.10441	3.07623	3.5318	2.75452	2.4422	2.03595	3.03396	2.61362	2.95177	3.51771	4.02259	4.2081	3.14199	2.03595	2.24964	3.6586	2.64415	2.72164	3.15138	2.84845	3.25001	2.87428
Peak_1513	Chr1	8931666	8933182	2.38496	2.24301	3.04702	2.23976	1.44441	1.93744	3.50863	4.14469	3.81311	4.75257	2.87365	3.43277	3.83804	3.70259	3.71992	5.03756	3.81095	4.1306	3.39918	3.76543	5.1665	3.8803	3.56497	3.14671	3.95831	2.59734	3.0947
Peak_1514	Chr1	8933215	8935577	10.4408	11.2985	13.2387	11.0898	11.8495	10.7406	11.8495	12.8428	12.6133	15.4807	13.9169	14.2418	15.8327	15.0932	15.777	20.5157	20.0705	21.5327	13.1406	15.2803	16.321	13.9106	14.7496	13.4919	14.0345	10.5111	13.2686
Peak_1515	Chr1	8939261	8940182	1.90943	2.43181	2.31949	1.56713	2.44964	2.79016	1.90943	1.18203	1.63666	1.09824	2.79729	0.903905	2.18221	1.00018	2.19825	1.81851	3.89018	2.36763	2.42468	2.36406	1.41915	1.82742	2.72955	3.30541	2.09128	2.54591	2.81334
Peak_1516	Chr1	8945702	8946706	5.75571	5.81623	5.56108	7.28501	6.28565	5.73935	6.01251	6.23168	6.21041	6.50646	7.09037	7.45184	5.75571	6.84012	6.84012	4.78907	6.35926	4.01052	5.04258	5.94871	7.33407	6.29547	7.25721	7.00041	5.23886	5.92255	5.4384
Peak_1517	Chr1	8948366	8949176	3.26934	3.10111	2.99774	3.51459	3.41121	3.92806	4.95772	3.29569	3.92806	3.28149	4.1571	2.79099	4.29696	3.78821	4.6172	4.40033	3.12543	2.73627	3.81659	3.73146	2.77072	3.8247	3.84497	4.98609	3.72132	2.791	3.36054
Peak_1518	Chr1	8951080	8951970	4.72843	7.2633	7.13784	8.31672	7.67839	10.0398	9.19304	8.6119	7.96066	8.39974	10.9364	9.24469	9.7502	7.48837	8.56578	7.89609	7.48099	7.43856	8.71152	7.73558	7.44224	11.0693	11.9807	10.9752	6.75964	5.97003	6.39066
Peak_1519	Chr1	8957208	8958023	3.30168	2.81015	1.73847	3.49909	4.6856	3.41449	5.33829	3.5132	4.52042	3.28959	3.17275	3.41247	4.72791	6.34953	4.5184	4.6292	3.04987	4.1135	3.66831	3.068	2.97937	3.40442	3.4447	4.27466	3.56758	2.649	2.87663
Peak_1520	Chr1	8959452	8960730	2.41235	2.49075	1.95995	3.32485	3.12949	2.8686	2.50745	1.85199	2.04863	2.9727	2.208	1.84043	2.26326	1.70419	1.6078	2.26583	3.08066	2.25041	3.659	3.01511	2.51388	1.96638	1.70419	1.70419	3.07937	1.90083	2.51516
Peak_1521	Chr1	8962059	8962816	6.22818	6.64455	7.39271	7.89799	7.18886	7.97606	7.07827	7.75487	7.66812	5.8747	8.07364	6.96333	5.5364	5.56893	5.55808	4.74921	4.71668	5.12437	5.6123	6.22818	4.64294	5.03763	5.77278	6.37998	6.76165	7.72451	7.63125
Peak_1522	Chr1	8973930	8974749	6.10607	5.44655	4.17562	4.11148	7.58949	6.19427	5.97176	4.89328	6.10807	6.92596	7.73983	5.85148	6.97808	6.45487	7.27677	6.07601	5.71517	6.98009	6.81971	5.79134	5.06567	7.09235	6.76159	6.64532	3.98719	5.11178	4.19166
Peak_1523	Chr1	8976476	8978031	9.10422	8.45347	7.15196	7.5534	7.93688	8.42283	6.95441	7.87772	7.20372	7.43296	9.12323	6.95018	5.98145	7.82701	8.40381	7.12978	7.08435	7.67278	7.07801	7.73193	6.50754	7.75835	7.88406	7.59671	7.97385	8.22528	8.38585
Peak_1524	Chr1	8981802	8983131	9.95914	9.64397	8.27456	8.52669	8.13119	8.38703	7.8012	7.56019	7.54906	5.69517	8.63545	7.12267	7.23762	7.9149	7.24873	7.02751	8.29681	7.76536	10.8379	6.24639	6.87301	11.0566	9.11376	11.1197	12.3469	9.48948	11.6215
Peak_1525	Chr1	8994364	8995636	11.2224	11.7609	11.1514	12.4259	12.626	13.4615	10.8415	11.4174	11.7351	10.2333	14.6985	12.2425	11.7402	13.6629	12.6118	12.2271	10.9978	10.95	12.2942	10.1584	10.3431	12.9812	14.3473	12.8391	8.79614	11.2483	9.90017
Peak_1526	Chr1	8999126	8999903	5.09828	4.20455	3.76719	5.99201	5.09405	5.38774	5.74058	6.27513	5.05813	5.26308	6.94278	6.33006	7.65482	7.68439	7.36113	6.14202	6.22865	5.40042	5.35604	6.39556	5.73002	6.94913	6.93645	5.97088	4.74121	5.14265	4.84685
Peak_1527	Chr1	9003983	9004739	5.08988	5.89549	7.39596	7.74557	6.70327	6.82921	5.93675	6.8987	6.56212	4.74896	7.42419	7.01378	6.79447	7.81288	7.06373	4.85537	4.9292	5.01822	4.94873	3.73055	4.98348	8.01917	7.79551	7.60008	3.88907	4.15616	3.76529
Peak_1528	Chr1	9020304	9021098	3.69077	4.00712	5.37798	4.07949	6.11613	7.57383	6.75918	8.07628	7.0321	8.18172	6.17196	5.73982	7.85297	8.62834	8.75239	7.06933	7.46425	7.55523	5.67158	5.27253	7.57383	6.10373	7.91707	6.11614	4.25731	4.74528	4.39998
Peak_1529	Chr1	9023322	9024152	3.41615	2.74558	3.24999	3.84935	3.45967	2.96317	2.51612	2.44096	2.99086	4.82059	2.52206	3.78012	3.86913	3.91858	3.55462	3.74056	5.64941	5.07181	3.7188	3.28362	3.13922	3.48341	3.12933	2.21941	3.22823	1.64181	2.42117
Peak_1530	Chr1	9026808	9027869	7.49611	9.37517	11.2496	9.23587	11.5793	11.6567	9.16621	11.5468	10.5469	8.57803	11.2805	8.96344	10.4989	9.03774	8.89069	7.8939	7.30109	8.44647	8.45885	7.98986	8.24835	11.214	12.1922	12.0808	7.03795	7.4342	7.27941
Peak_1531	Chr1	9030625	9031598	6.23931	5.68069	5.44948	5.42248	8.18856	6.37263	6.16168	6.61735	6.95994	8.813	9.15222	8.48897	7.36667	8.22906	8.00461	6.4047	6.71354	5.96928	7.83584	7.41392	8.67798	8.54973	8.8687	9.12522	5.68069	7.55232	5.50855
Peak_1532	Chr1	9033042	9033941	2.515	2.3287	1.76981	3.00265	2.42733	2.56796	4.25376	4.16792	4.88022	5.4245	4.67018	3.78984	4.10582	5.19437	4.12408	4.26107	4.06929	3.35333	4.29029	5.293	5.09392	3.61451	3.36794	3.32776	2.70129	3.41543	3.35515
Peak_1533	Chr1	9042324	9043598	2.00478	2.49856	2.77059	3.37267	2.95882	2.93819	5.29236	4.66836	5.15182	4.61163	3.28629	4.01084	5.60564	4.5549	4.89269	4.05984	4.28417	4.44532	3.15607	3.33786	4.19005	2.44828	3.68209	2.75899	2.76414	2.36706	3.00265
Peak_1534	Chr1	9046283	9047135	7.75259	5.90839	6.5713	7.13401	8.68143	8.90112	7.12437	9.64883	7.5541	7.31707	9.54091	9.142	7.1976	7.64275	7.93759	6.09724	7.38838	8.10717	7.45004	5.25896	7.1128	7.47317	9.01097	6.9914	7.45389	6.6638	8.00118
Peak_1535	Chr1	9053956	9055552	6.44752	6.41253	7.29258	6.48149	7.65488	7.08671	7.98735	7.86795	7.90706	8.34863	9.66922	8.13865	7.71665	8.69447	7.90706	6.77999	9.0393	7.49123	7.36153	7.46138	7.23184	7.92251	7.82164	7.91221	6.51751	6.47223	6.33738
Peak_1536	Chr1	9060307	9061167	3.2093	5.0631	5.42393	5.12037	5.73512	6.17423	7.20518	6.52934	7.42664	4.82445	7.53928	6.98944	4.98101	5.7943	5.06119	3.60259	5.82104	4.42926	5.76376	4.82063	5.7943	7.57747	5.19101	5.14137	2.96493	3.91951	3.87178
Peak_1537	Chr1	9067171	9068268	3.20374	2.2007	2.31298	3.13488	2.56599	3.15583	3.63939	4.08103	4.60949	2.54054	2.54054	3.43579	2.73067	3.43579	2.60042	3.67382	2.19771	3.0181	3.4298	2.06147	2.69174	2.67228	1.85188	2.29053	2.19022	2.13782	3.31153
Peak_1538	Chr1	9070941	9072297	7.9476	7.15418	8.1608	7.96093	9.11775	8.8452	8.38248	9.19044	8.92394	6.71203	7.55028	7.26804	7.33588	7.10451	7.7768	8.2359	7.98637	7.30196	6.54608	6.22992	7.3177	10.0081	10.6877	11.1153	10.0638	9.13714	9.63378
Peak_1539	Chr1	9074448	9075421	4.21748	3.89683	4.05209	3.41584	5.34822	4.73053	5.81571	5.57606	6.3085	5.05794	5.53217	6.55659	6.57347	6.88568	9.42056	7.61138	7.01901	6.71861	4.81998	4.06221	4.13141	4.53814	7.10846	5.68575	4.88411	3.33652	4.90605
Peak_1540	Chr1	9076062	9076834	3.48747	5.73731	6.39866	5.48851	4.89309	4.7421	6.09669	4.99304	5.47362	5.31201	4.22536	4.77188	3.31948	4.73572	3.52149	4.55498	5.06108	4.49969	5.01642	4.59112	5.03556	4.39974	5.50552	3.74265	3.62144	3.63632	3.60442
Peak_1541	Chr1	9086959	9087548	2.00598	1.61871	1.73573	2.31523	1.11165	1.69394	1.49891	1.53235	1.35682	2.44618	2.65792	1.69672	1.62429	3.32101	2.61334	2.35703	0.710451	2.03941	1.53513	1.56299	2.23722	1.93911	2.3013	1.37911	0.994631	1.91125	2.35424
Peak_1542	Chr1	9091417	9092565	6.0215	6.13595	6.22322	7.16314	8.78976	11.1303	8.44212	7.96572	7.47931	5.69103	9.20321	7.95284	5.62808	7.00434	6.8999	6.9371	6.97859	6.57945	7.9557	7.25899	6.27472	8.26759	8.51938	9.09306	4.97571	6.01435	4.89131
Peak_1543	Chr1	9098975	9099891	7.22227	8.23329	7.10396	6.2507	6.81356	7.59871	9.03457	10.1047	10.4668	8.48245	10.5134	9.12239	8.14545	9.07041	8.86785	7.03943	6.47836	8.42688	6.74007	6.95697	8.04685	9.20307	9.28732	8.58821	6.69884	5.16261	5.60178
Peak_1544	Chr1	9113794	9114539	5.0173	3.2986	5.49546	6.855	7.19653	6.01327	5.83038	5.89869	6.27989	5.76427	6.5399	5.25748	6.8572	6.29311	5.66071	5.16493	4.88509	5.28392	3.94641	4.7617	4.99306	5.66733	8.13521	5.34782	4.91814	4.27033	5.16934
Peak_1545	Chr1	9124879	9125675	3.58045	5.57486	4.74781	4.44256	6.62671	6.33384	5.16649	7.59608	6.76696	4.46318	7.04333	6.46584	6.05954	7.74251	5.38304	5.78523	5.69861	6.33385	4.457	3.78669	5.46761	8.27876	7.5342	6.28847	5.21186	6.58547	4.78905
Peak_1546	Chr1	9145462	9146078	2.18195	2.81602	3.11707	2.71745	2.10469	3.92697	3.13572	6.40465	4.97133	2.64551	3.76712	3.39414	3.40214	4.64363	3.4421	3.189	6.29009	4.14011	4.20138	2.44304	3.95894	4.23336	2.88263	3.74581	2.98919	4.27065	3.18101
Peak_1547	Chr1	9151588	9152735	7.86957	8.83608	9.04227	8.81317	9.27852	8.6485	9.55918	11.5065	10.0775	9.69233	12.1079	12.7494	10.4913	11.7528	10.046	9.56634	9.84555	9.15539	10.5114	8.76735	8.73012	12.6663	11.571	11.2474	8.56688	8.54398	9.0036
Peak_1548	Chr1	9154999	9155792	4.42829	5.44272	4.64567	6.47164	6.39711	6.9685	5.7574	5.62283	5.91267	5.6456	5.76775	5.90439	5.30608	5.67873	4.73469	5.10113	4.80715	5.02453	5.94786	4.98105	4.99968	5.57936	7.7138	5.6808	4.68293	5.63733	4.11775
Peak_1549	Chr1	9158265	9159158	5.53262	5.67236	5.67236	5.70913	5.21268	6.3637	5.52343	4.78243	6.71857	4.03592	7.20214	5.40207	5.01779	7.53311	6.41702	5.97758	5.8691	5.62088	5.06559	5.41494	4.64453	7.14883	4.41837	6.11364	6.13203	4.56731	4.49559
Peak_1550	Chr1	9165071	9166025	4.62326	3.98124	3.98124	3.69551	4.9589	3.76264	6.4082	5.98649	5.8419	5.45806	5.26701	5.70592	5.06218	7.01751	5.53036	6.29976	5.58028	5.35479	4.29106	5.09488	5.15168	5.01743	6.82818	6.66122	6.23779	4.38917	5.53036
Peak_1551	Chr1	9171019	9171785	3.76121	3.45046	4.38487	5.5936	6.39727	7.13237	5.84649	4.59061	6.28368	5.63431	6.51086	7.13022	6.08438	5.67503	5.57431	5.05996	6.12938	4.61633	4.93994	5.09424	6.30512	6.23868	6.73803	7.26953	3.47617	4.54774	4.57346
Peak_1552	Chr1	9178299	9180198	3.05572	4.41833	6.23948	6.04395	4.56281	4.48841	3.99787	4.0965	4.17609	2.5669	1.36261	2.20614	1.54949	1.45605	1.26745	2.02965	2.47087	2.25026	1.63341	1.93534	1.89295	2.02965	2.54874	2.11789	3.17684	3.03755	2.64736
Peak_1553	Chr1	9184598	9185607	3.78397	4.15016	3.81815	4.10459	5.51727	5.16898	5.42613	4.93788	5.01437	6.02668	6.10968	6.88275	4.81581	6.65978	6.12108	5.38219	5.18363	4.84348	5.85416	5.21781	5.58562	7.97807	5.87207	6.33917	4.81418	4.88742	4.12737
Peak_1554	Chr1	9198901	9199709	2.38339	2.10096	2.05016	3.2124	3.72646	4.0414	3.93778	6.50201	4.70583	3.31399	3.96013	4.63268	3.52734	3.27335	3.54766	2.3204	1.97092	1.41215	3.21443	3.07423	3.40949	3.43997	3.62893	3.13519	1.38777	1.5869	0.936695
Peak_1555	Chr1	9205721	9206781	8.35218	7.57599	7.11121	10.2392	9.63963	9.92315	7.14219	9.47851	9.32668	6.76726	10.0099	9.00752	9.2864	8.9502	9.29724	7.6643	7.42726	9.03852	8.3057	6.82304	7.60542	11.3392	13.6368	12.794	7.98035	7.71233	8.04387
Peak_1556	Chr1	9209258	9210910	4.43415	5.62946	5.25754	4.01749	6.60001	6.67957	5.77564	6.81183	5.93275	5.20583	6.50952	6.37726	6.9421	5.79154	6.48565	5.64636	4.21339	5.81243	5.64934	5.39874	5.86712	6.28976	6.29274	5.34008	5.08053	3.55011	4.02942
Peak_1557	Chr1	9211630	9212318	3.28519	2.55515	2.35475	4.71665	3.67407	5.11984	3.59773	3.70031	3.65021	4.59974	4.01046	4.50193	4.01523	3.29712	4.01523	3.23509	3.27326	2.95357	3.61442	3.24463	2.3953	4.99817	4.11782	3.89595	2.55515	2.85814	3.2327
Peak_1558	Chr1	9214059	9214646	3.34628	2.57191	1.42574	2.75922	3.73766	2.87104	3.13662	2.68374	3.2708	2.79556	3.80755	3.62584	3.56154	3.37703	2.85426	2.99404	3.56434	2.42375	3.75723	2.28117	2.82072	3.42176	3.64541	3.651	2.72287	3.7153	4.13463
Peak_1559	Chr1	9215847	9216664	5.66886	8.40382	8.09636	9.04888	7.50958	8.10038	7.58193	6.95897	7.93158	7.37896	8.83184	9.41259	7.49753	8.5264	9.44877	7.64221	7.10969	6.90472	8.28123	7.92555	6.49477	6.22349	9.33825	8.21292	5.22676	7.02529	6.23353
Peak_1560	Chr1	9225016	9225840	4.28381	5.94553	6.42572	5.3458	7.15894	7.09718	6.40181	6.12286	6.70665	5.8738	6.4835	4.54682	5.71242	7.68097	6.12485	5.05689	6.39185	4.60859	4.499	5.15253	4.87757	6.16869	4.93934	6.12087	4.84569	4.64047	4.23599
Peak_1561	Chr1	9241257	9242731	2.95548	2.77271	2.76602	3.49375	3.31432	3.29426	3.68543	4.27831	3.73558	2.1932	2.33919	1.83993	2.01155	2.21661	2.67241	2.44395	1.87559	3.23966	2.75933	2.36594	1.81875	1.36407	1.30723	1.25039	1.78978	2.76268	2.55539
Peak_1562	Chr1	9246020	9247382	5.20634	4.7179	4.45982	5.81175	7.29755	5.49336	6.67887	6.96952	7.85111	5.59829	6.56792	6.04451	6.11928	6.67284	6.68731	7.5472	5.87326	6.92128	6.47505	5.77557	5.45477	6.19044	7.01173	5.57417	3.82184	4.74323	4.63469
Peak_1563	Chr1	9250470	9251734	5.37707	6.17103	5.96572	8.38008	7.25736	9.58855	9.60025	9.14544	9.13634	9.27408	6.2295	8.02272	8.16827	7.36651	5.63436	5.75651	5.67335	6.36205	5.0821	7.34702	8.68154	5.69674	5.10289	5.79679	5.10289	5.44724	4.90148
Peak_1564	Chr1	9259628	9261003	6.40552	4.94092	4.02943	6.26814	7.83905	6.7412	5.31723	4.29225	4.70797	4.64824	6.80691	6.92159	3.88369	4.15128	4.71872	8.15324	9.49718	7.77216	9.41236	5.79626	6.25141	5.36143	5.16073	6.27531	7.49022	7.0542	7.97763
Peak_1565	Chr1	9274059	9275137	2.81074	2.87473	4.50633	3.93352	3.29062	4.45453	0.903398	0.978047	1.05574	1.11363	0.112734	0.423515	0.0776953	0.233086	0.158437	0.388477	0.621562	0.155391	0.388476	0.991757	1.32082	0.310781	0.0776953	0.310781	3.20836	4.90242	3.2114
Peak_1566	Chr1	9285320	9286301	4.11449	3.76967	3.04486	3.10679	2.79544	3.61734	4.78071	4.67191	4.88449	5.28121	3.15868	3.36625	4.09775	4.82925	4.92299	4.74389	5.5708	6.17007	4.10445	5.28121	5.3783	2.42049	2.65149	2.65149	3.58553	3.01138	3.73116
Peak_1567	Chr1	9289491	9290064	2.79788	2.37691	2.18504	3.23889	4.12952	3.27898	3.39354	4.84832	2.95825	3.22171	4.47316	2.68333	3.7601	2.37404	4.26125	3.57682	4.4073	3.50522	2.6461	4.41303	2.41127	3.41358	3.78873	2.19076	3.50522	3.51954	3.79732
Peak_1568	Chr1	9295609	9296526	8.1509	7.02102	7.13204	9.44194	10.0221	10.6309	10.2853	9.25571	9.92361	8.05241	10.613	11.6927	9.6407	9.40612	10.7777	8.46247	10.0042	9.38106	7.79456	7.66564	7.26096	9.81081	10.4447	9.81081	6.37639	8.86715	7.03355
Peak_1569	Chr1	9303044	9304221	4.9523	6.01281	6.19979	8.07243	8.45616	8.14638	6.35887	8.33197	6.78446	5.55092	9.50829	7.94404	6.82493	6.29886	5.75186	5.85373	5.87466	5.4365	6.77469	5.99466	6.29886	6.96447	7.5938	6.67702	4.78764	6.46771	5.61511
Peak_1570	Chr1	9316064	9316827	6.32988	8.11567	8.55459	7.81876	9.4733	8.28349	6.69349	5.81566	5.91893	7.79078	9.62175	7.49817	6.38797	7.19265	5.46925	5.92539	6.02005	6.51706	5.6091	5.88665	6.13623	7.93064	8.79341	7.41857	5.57898	5.47571	6.36645
Peak_1571	Chr1	9320805	9322154	3.44343	4.07538	4.23489	5.68507	5.93225	5.27595	5.9286	6.46192	5.98948	5.3003	5.96269	5.46468	5.77518	5.45616	5.10305	4.32986	5.37945	4.81326	4.62452	4.49424	4.62209	4.95328	7.52003	5.85432	3.49335	4.60261	4.51372
Peak_1572	Chr1	9329458	9330578	6.78338	6.57809	5.62642	7.59574	7.66759	8.51074	9.22927	8.64859	7.81716	10.0783	8.87587	9.72636	9.29672	8.62805	9.01517	9.19847	9.89353	9.41403	8.97851	9.41109	10.1047	8.6002	9.30258	8.00192	8.75416	7.76731	8.07084
Peak_1573	Chr1	9336770	9337664	2.34171	2.29028	1.0726	2.88719	4.01488	2.92209	2.38763	3.18473	2.40415	2.10846	2.0607	2.06254	2.79169	2.71638	1.96704	2.34171	2.75495	1.83847	2.30865	3.27656	3.16819	3.23799	3.09473	3.78347	3.37757	1.7797	3.67694
Peak_1574	Chr1	9342980	9343817	4.20167	4.29386	5.74934	5.04514	6.51042	6.22011	4.73325	7.10282	5.23148	4.4547	6.62615	5.95334	6.30054	5.63753	6.56927	5.68461	4.62144	4.63125	5.98472	5.27267	5.36095	6.60066	6.77524	6.91843	3.8015	5.76111	4.60182
Peak_1575	Chr1	9355975	9357106	3.28322	3.62882	2.73287	4.08769	3.92215	4.48992	2.96521	2.52232	2.05764	2.29578	2.73287	2.78805	1.85144	1.99955	2.36403	3.093	3.41246	3.66948	3.91779	2.2406	2.36839	4.32003	3.9904	3.76532	5.3699	2.6835	4.90523
Peak_1576	Chr1	9373844	9374653	6.55486	6.50413	7.6426	5.51785	6.77606	7.53707	6.52848	9.29045	7.71769	4.64522	9.24783	7.34834	5.89938	6.84506	6.74765	4.27791	6.39251	5.98055	6.00287	5.46915	6.11246	6.25046	9.61109	7.76234	5.45291	6.2951	5.36768
Peak_1577	Chr1	9393558	9394483	5.77279	5.70356	4.92249	7.9509	7.87634	9.36924	5.6219	8.65563	6.9	7.01894	7.93669	7.86746	6.62841	7.07219	6.5716	6.2645	6.00533	6.34084	7.51953	7.78225	6.09586	6.35149	7.69705	6.60888	5.46923	6.78995	5.16036
Peak_1578	Chr1	9394685	9395428	2.60488	3.5748	3.12408	3.10862	2.98931	3.60573	4.938	4.65961	4.48728	4.70159	2.47452	4.22878	2.163	4.2818	2.08346	3.86644	5.66489	4.65077	3.77806	3.47316	3.61677	2.7043	3.16164	2.82361	3.45549	3.14839	4.16912
Peak_1579	Chr1	9398474	9399531	5.55128	5.70976	5.40058	6.01428	6.1106	5.4534	6.51456	6.83151	5.94436	5.84803	5.82473	5.72684	6.63575	5.47049	5.00594	6.54874	5.22967	5.92417	5.26696	4.39068	5.04167	6.75072	7.8849	6.67304	3.62317	5.65072	4.59577
Peak_1580	Chr1	9404877	9406390	11.2112	13.5672	14.0276	13.9342	10.3176	11.9473	14.3023	14.7355	14.8647	14.4477	16.743	15.8983	16.1686	16.3358	16.1773	15.8549	16.3434	16.6833	12.348	15.6942	14.5628	13.9787	14.8538	14.0743	10.2004	12.5141	11.1298
Peak_1581	Chr1	9407359	9408793	6.04479	9.7562	11.5191	11.3473	11.3507	11.1766	10.7677	12.1514	11.392	8.81918	8.91082	7.59464	9.44692	9.18688	8.08606	10.3221	10.1067	10.148	6.25327	7.36211	6.13413	7.10208	6.54308	5.75842	8.63246	6.19256	8.31172
Peak_1582	Chr1	9410196	9411218	3.50771	4.48306	5.51143	5.99348	5.41984	5.18042	5.16275	6.29878	6.38233	5.58534	4.85584	4.61964	5.57892	4.50716	5.47769	5.22542	6.92223	5.86012	4.08296	4.26131	4.07492	3.95602	3.38399	3.87407	5.35075	2.89069	3.9753
Peak_1583	Chr1	9421087	9422388	7.14329	8.71132	9.0926	10.292	9.64684	8.1192	9.09134	9.39308	11.3272	7.84524	5.99187	7.4829	6.82261	7.31372	6.61303	7.18747	6.55496	7.30867	5.1422	6.257	7.91972	7.59779	6.90088	7.02713	5.4452	6.4388	5.89592
Peak_1584	Chr1	9425542	9426635	3.26654	3.8315	4.79914	3.68575	4.80966	4.2462	4.45205	3.54001	3.66472	3.42581	3.7759	3.01862	4.46708	4.09595	4.07191	3.2996	3.68876	2.81127	3.32814	4.60231	3.35219	3.64969	2.81127	3.55503	3.05168	3.67824	3.98476
Peak_1585	Chr1	9429012	9429610	1.95937	2.5192	3.21897	2.81008	2.74971	4.33861	3.34246	3.87484	3.04608	2.83478	2.72227	3.07078	2.82655	4.11907	4.02303	3.66628	4.28922	3.13116	2.99394	3.83916	4.81062	2.14598	2.79636	2.28045	3.92698	1.45444	2.37924
Peak_1586	Chr1	9434373	9435206	2.97025	2.18383	1.30675	2.71403	2.56423	2.35925	3.1161	3.11807	1.90987	4.78354	2.63124	3.01558	4.52141	3.82959	4.32431	3.97939	5.62909	4.70471	2.95842	4.15086	4.3046	2.71403	3.38218	3.03135	3.1161	3.15158	3.86704
Peak_1587	Chr1	9441080	9442001	5.09717	5.56784	4.00072	4.29489	6.28633	6.05812	6.56624	6.18649	6.23463	5.65877	5.75326	6.84436	6.88715	5.41986	5.74256	6.27207	4.59797	5.29507	5.78357	5.96007	6.42896	5.78179	6.94777	7.66091	5.42878	5.04547	4.40542
Peak_1588	Chr1	9447707	9448964	11.7953	11.9286	12.429	9.82353	15.2514	12.8458	13.2196	14.8411	14.5079	12.7113	13.8115	15.2423	15.3847	15.1391	15.6905	16.2994	15.4187	14.2727	11.9312	11.777	12.591	15.2684	15.2998	13.8298	8.53385	9.90716	10.0992
Peak_1589	Chr1	9450473	9451807	7.85571	8.67206	9.80486	8.79643	9.66941	9.47733	8.9762	8.16354	8.15984	7.66732	10.7382	9.34065	9.04022	10.3146	8.23371	7.89142	9.21137	8.66591	8.05518	7.4149	6.15405	9.63125	11.6863	10.6902	5.77727	7.53557	7.1711
Peak_1590	Chr1	9455862	9456409	1.14885	0.458941	0.344956	0.917882	0.764901	1.32883	1.78177	1.79077	2.3487	2.25571	1.07086	2.14172	2.22271	1.18785	1.43981	3.50655	1.37682	2.90663	1.00787	1.63179	1.29283	1.5298	0.611921	0.764902	1.20584	1.07086	1.28983
Peak_1591	Chr1	9456697	9458113	9.5994	8.41615	7.5728	7.66328	10.2084	9.76296	8.16442	12.6132	9.52399	8.7282	9.94045	9.88941	9.22819	10.9393	8.68876	9.87665	9.17018	9.40335	10.3105	10.7212	10.5831	10.7606	9.67249	10.3975	9.16438	7.39531	9.34767
Peak_1592	Chr1	9477854	9479582	5.3126	6.26617	6.40878	6.4316	7.25396	7.33382	7.06477	6.97731	7.72742	6.45821	7.176	6.71205	6.67118	7.2397	6.62459	7.44126	7.0933	6.01328	7.13607	7.44791	7.33953	6.50385	6.91932	5.98286	7.25111	5.44285	6.02469
Peak_1593	Chr1	9481479	9482755	8.61927	9.14575	10.3532	11.6198	9.45982	9.38517	7.95378	10.5038	9.09425	10.1755	14.1376	11.9133	10.8977	12.1476	12.3484	11.0882	11.6571	10.9337	9.76104	7.10678	7.62167	13.019	12.2737	12.2544	9.15089	10.1704	10.6763
Peak_1594	Chr1	9483194	9483849	3.62836	4.6407	3.65843	4.07189	5.02909	3.91652	3.34521	4.59309	3.3402	2.76136	5.32477	4.10696	4.00924	2.73129	2.86911	3.54567	2.91171	3.03449	3.22243	3.13973	4.37508	4.7284	6.79817	5.43753	5.10176	5.29972	3.85639
Peak_1595	Chr1	9485084	9485951	9.43474	8.86283	8.70564	8.19054	10.5729	9.64684	9.89114	9.45557	9.234	9.24725	11.3777	12.3379	11.7319	10.5558	11.4099	9.47641	7.8667	9.05031	9.21317	8.04471	8.74351	10.9498	11.6523	10.9157	6.94254	8.39885	6.78725
Peak_1596	Chr1	9487015	9488618	8.89019	8.93733	10.1917	10.9265	9.39029	11.4758	10.8896	12.559	12.0076	9.68031	14.6844	11.1325	12.1327	12.2065	13.1985	10.7031	11.0392	10.6221	9.29293	9.15356	9.51224	12.4155	11.2483	11.5332	8.52843	9.65265	9.52352
Peak_1597	Chr1	9492911	9493810	3.40264	4.10947	4.28846	5.09575	5.51582	4.38343	4.1734	4.28664	4.17339	3.32228	3.49031	3.68208	4.12591	4.09851	4.21175	4.19166	5.96695	5.04461	3.27296	3.21634	3.15607	3.63277	3.53963	3.75149	3.63277	2.515	4.16244
Peak_1598	Chr1	9495451	9496467	7.15864	8.29006	9.79646	8.23349	8.97052	8.95759	8.64403	9.55725	8.63918	6.33109	10.4543	8.66019	7.24916	7.23784	8.82667	9.2647	8.6408	9.64292	8.24318	7.03418	8.86223	10.2393	11.0911	10.8535	6.52666	8.34017	6.75941
Peak_1599	Chr1	9498700	9499485	3.70584	2.98643	3.29803	5.01293	5.73862	6.38902	4.5863	6.06069	5.82227	4.96692	6.83866	6.64207	5.89547	6.86794	7.26738	7.03525	4.73478	6.25727	4.03836	3.51971	4.24122	6.76756	6.63371	6.26982	4.08228	4.22868	3.66192
Peak_1600	Chr1	9500939	9501309	1.80772	3.39391	2.36599	1.53302	1.83431	2.52107	4.06738	2.71159	3.83698	3.13693	0.580421	1.53302	2.2951	0.961461	1.5729	2.84451	1.80772	2.71159	1.12983	1.95837	2.27738	1.79443	2.03369	2.03369	2.79134	1.82545	2.98629
Peak_1601	Chr1	9501818	9502961	4.88395	4.64399	4.26753	4.78193	5.96448	5.06068	2.99302	4.10804	4.09223	3.89681	4.65548	3.31919	3.54909	3.47581	4.12671	5.99035	5.11385	5.11098	4.33506	4.00745	2.78467	4.47013	4.90981	4.68997	3.83072	4.77475	3.56633
Peak_1602	Chr1	9507778	9508429	1.40176	2.68754	4.50025	1.98414	3.16152	3.19681	4.04392	3.70609	3.58759	3.17665	2.67998	3.69348	4.2557	3.93803	3.08588	3.3027	4.8759	4.0288	3.43884	3.41111	3.70356	4.61622	4.27083	4.98179	1.76985	2.52619	2.60687
Peak_1603	Chr1	9512158	9512965	6.31679	6.5365	6.32899	7.78969	7.65134	6.68501	7.57404	7.78155	6.80911	7.01458	8.14774	7.71441	7.53946	9.25038	6.87421	6.11131	7.33602	6.64026	7.26074	7.36246	6.76842	7.78969	8.70313	8.44273	7.15902	7.84462	6.74401
Peak_1604	Chr1	9514362	9515905	4.61091	4.94095	6.26003	7.89849	5.93957	6.3601	6.47615	5.37532	5.28163	5.07615	6.01409	5.91827	4.61943	5.51584	5.51159	5.6468	5.21988	4.83236	5.3306	5.11129	4.60133	6.24406	6.00238	6.38246	4.13076	6.18976	5.0868
Peak_1605	Chr1	9517040	9517808	4.41621	4.68982	5.12375	5.19215	3.35812	4.24093	4.90785	5.66883	5.67096	6.20321	6.42766	6.03007	6.53027	6.04717	5.85693	7.15444	6.25452	7.86411	6.95778	5.52133	5.17718	5.61111	6.71837	4.91427	5.66882	5.72013	5.11306
Peak_1606	Chr1	9526327	9527312	9.10586	8.7941	10.4796	9.67435	10.973	11.5432	10.1328	12.095	10.893	10.893	12.6935	12.6018	10.0328	11.5315	11.7116	10.2345	10.4462	10.7897	9.48095	9.60265	10.948	13.202	13.072	12.5718	8.49735	10.8813	8.76409
Peak_1607	Chr1	9528298	9528948	5.7217	4.02236	3.29768	5.02227	6.54485	4.83036	4.46676	6.08025	4.57029	5.88582	7.19126	7.74424	4.52484	3.73955	5.42122	6.54486	4.74199	3.95418	5.8934	4.35818	4.75209	6.95391	6.38325	6.4287	4.09306	4.63594	4.62331
Peak_1608	Chr1	9530781	9531460	3.19814	3.11595	3.6816	4.78391	4.11189	3.49788	5.54054	5.18035	5.77501	3.77104	4.39713	5.90797	5.16343	4.01036	4.81775	4.0853	4.3367	4.52284	3.99102	3.89674	3.7227	4.89994	5.26738	5.06916	3.63809	3.79038	3.77588
Peak_1609	Chr1	9532120	9532963	4.96642	3.07918	1.78207	4.13284	4.91968	5.5955	5.74937	6.89846	6.37649	6.05903	6.92767	6.19537	7.28798	7.17307	6.63747	5.66172	5.08328	5.65978	7.45158	5.17676	5.29167	4.84957	7.08933	5.89154	6.44661	4.95669	5.5137
Peak_1610	Chr1	9534452	9535242	4.50328	3.59098	3.21277	4.77343	4.8711	4.74849	4.79006	4.98124	4.64666	3.79464	4.82538	4.71316	4.37443	4.28299	3.17536	3.10055	2.01369	3.49123	4.78382	2.8865	4.49912	4.33495	5.50077	3.58683	3.79464	4.09596	3.16912
Peak_1611	Chr1	9543561	9545498	5.75326	6.25624	6.70747	5.72103	7.99587	7.6498	6.26896	6.91782	6.48948	5.3826	8.20622	6.51578	7.43776	8.3521	7.60146	7.49459	8.53617	8.08408	6.70408	6.27235	6.53189	9.50734	8.4751	8.79911	6.49712	6.48864	6.29186
Peak_1612	Chr1	9553614	9554209	2.01061	1.8865	1.82858	1.69068	1.88925	2.84353	2.0244	2.26986	2.73873	1.82582	2.58428	2.96764	1.40936	1.82858	2.47396	2.63392	2.02164	2.44638	3.46133	2.86008	2.38846	3.19932	2.49602	2.53188	2.68357	1.93062	2.64771
Peak_1613	Chr1	9557486	9559360	6.29725	7.68417	8.72567	9.19119	8.35658	8.54156	9.4165	8.55647	9.2394	8.07955	10.3239	10.2651	8.90101	9.76278	9.48487	8.03133	8.98517	7.33612	8.36184	7.64033	8.22771	9.75052	9.91007	10.6027	7.24669	7.66137	7.33261
Peak_1614	Chr1	9563197	9564118	6.25781	6.00286	6.18293	7.43271	6.55732	5.60528	8.22429	8.98022	8.49706	8.39009	6.93885	6.62151	8.21181	6.79979	7.4844	6.99234	8.8055	7.58425	7.08683	6.94955	8.16902	7.94617	6.87111	7.29186	6.092	7.80532	5.21662
Peak_1615	Chr1	9567305	9567986	6.6571	8.12012	8.17074	9.88443	9.51565	7.93694	8.00202	7.41392	7.84776	7.96345	12.4128	10.6195	8.27438	7.97068	9.28909	9.65304	9.08663	9.52771	9.32524	9.2674	9.11796	9.43853	10.4653	9.60002	7.65012	8.18761	7.59227
Peak_1616	Chr1	9591989	9592928	9.00761	7.79925	9.37309	9.05833	9.5532	8.70333	10.174	12.2182	11.3859	10.6741	13.7676	13.5018	10.926	10.1163	9.78928	11.211	9.81202	9.68786	10.9924	10.4975	10.2894	11.2215	14.0754	12.7061	8.00035	10.8857	10.3471
Peak_1617	Chr1	9604948	9606258	6.62406	6.58644	6.77828	7.58826	9.54425	8.94366	9.97558	10.2314	11.0915	9.39003	11.3159	9.869	11.1391	12.1798	11.1116	7.666	10.4044	7.79389	8.9562	10.2915	10.2213	8.76061	11.6344	10.8382	7.02027	8.0572	7.01149
Peak_1618	Chr1	9611021	9611989	3.86774	3.02634	3.2791	2.73286	3.67435	3.63364	6.66167	4.27826	5.31474	6.33766	5.85419	5.28591	5.50983	7.84743	6.68202	6.4615	6.24606	5.25029	6.79568	6.81604	5.98651	6.20874	6.7872	5.19431	2.22395	2.44787	3.7456
Peak_1619	Chr1	9614450	9615405	7.87506	6.55108	7.72203	8.35134	8.62817	7.49333	8.66772	8.45279	8.93079	7.17868	9.07006	7.48646	7.48818	8.84482	7.72374	8.12609	8.76573	8.09858	9.32282	8.42699	7.20447	10.0673	10.3562	10.3304	8.37541	8.78636	6.96718
Peak_1620	Chr1	9631256	9632095	1.9021	1.69663	1.99603	2.61245	2.99404	1.79447	3.45391	3.79246	2.8688	4.90201	2.45785	3.07819	2.54592	2.59484	3.45391	1.98624	2.93925	3.0234	2.30522	3.44021	4.09381	2.16628	2.37958	1.96668	1.62618	2.09583	2.29935
Peak_1621	Chr1	9636482	9637538	7.9779	7.84571	9.25312	7.68553	9.33709	11.6169	9.78187	10.3013	11.0073	10.6761	10.9809	11.9248	12.5796	11.9357	12.1892	10.8394	12.6729	10.5237	8.64505	10.7507	9.77097	11.239	11.6605	10.7818	10.3557	8.62328	9.5968
Peak_1622	Chr1	9638944	9639572	3.51755	3.46528	3.23008	3.1151	3.45483	5.31552	3.5855	5.86433	5.3312	4.68048	6.80251	5.80422	4.79809	4.98624	7.01158	3.86513	3.9383	4.08726	4.54198	4.6256	5.0176	4.91307	5.36257	5.37563	5.16395	5.0359	3.94091
Peak_1623	Chr1	9641078	9641973	7.32734	7.27046	7.47777	7.24845	6.98426	8.18592	7.90707	7.67224	7.36402	7.10168	8.96195	10.6149	9.16743	9.38573	10.9983	8.10704	7.95293	6.48343	8.25196	7.2356	6.68523	10.1544	9.94529	9.05919	6.37885	7.84469	5.87434
Peak_1624	Chr1	9648134	9649078	3.71027	4.94006	5.54018	5.85154	3.54154	5.41319	4.53651	6.26727	5.15575	2.23346	2.20737	2.30304	2.25782	2.40915	2.57266	3.5224	2.65441	3.5398	4.14165	2.49438	2.83706	1.50811	0.975837	1.59682	3.37107	3.60068	3.34324
Peak_1625	Chr1	9657219	9658076	8.28217	8.57146	10.7287	9.42209	8.99485	10.1578	9.80909	9.24583	11.2211	9.85315	10.3091	7.94881	7.84727	9.31863	8.87607	9.26691	9.90297	9.49489	9.45657	9.18452	7.99479	11.61	11.269	11.6215	6.64412	6.79931	6.72267
[truncated: 13,526 more rows]

## Sheet: H3K9ac_peaks
Peak_ID	Chromosome	Start	Stop	ZT0	ZT0	ZT0	ZT3	ZT3	ZT3	ZT6	ZT6	ZT6	ZT9	ZT9	ZT9	ZT12	ZT12	ZT12	ZT15	ZT15	ZT15	ZT18	ZT18	ZT18	ZT21	ZT21	ZT21	ZT24	ZT24	ZT24
[truncated: 16,966 more rows]
