# Supplementary material for: Diurnal regulation of SDG2 and JMJ14 by circadian clock oscillators orchestrates histone modification rhythms in Arabidopsis
Source: Genome Biol. 2019 Aug 20;20:170. doi: 10.1186/s13059-019-1777-1 (PMC6892391; doi:10.1186/s13059-019-1777-1)
Supplement: Supplementary file 4 — Table S3. The list of diurnal H3K4me3 and H3K9ac peaks with coverage levels at all time points. (XLSX 2978 kb) [file 13059_2019_1777_MOESM4_ESM.xlsx]

## Sheet: Diurnal_H3K4me3_morning_phase
Table S3 The list of diurnal H3K4me3 and H3K9ac peaks with coverage levels at all time points
Peak_ID	Chromosome	Start	Stop	Genes	ZT0	ZT0	ZT0	ZT3	ZT3	ZT3	ZT6	ZT6	ZT6	ZT9	ZT9	ZT9	ZT12	ZT12	ZT12	ZT15	ZT15	ZT15	ZT18	ZT18	ZT18	ZT21	ZT21	ZT21	ZT24	ZT24	ZT24
Peak_6	Chr1	35955	37913	AT1G01060	8.91204	9.41633	8.75764	8.78617	14.122	13.7763	3.6895	4.11241	3.89424	1.19823	1.04216	0.599114	0.385145	0.252568	0.513526	0.941466	0.941466	0.898672	1.56995	1.92572	1.48772	5.27707	6.50467	6.10862	8.44885	10.4853	9.85014
Peak_9	Chr1	50439	51315	AT1G01100	4.11041	5.45431	6.3821	6.3671	6.47769	6.02222	8.0765	6.92003	8.32765	5.63986	5.97911	6.62014	5.94163	5.31373	5.57613	5.09443	4.44404	3.70181	4.68395	4.2641	2.8115	5.20314	7.17682	6.88067	5.00821	6.26964	5.04382
Peak_11	Chr1	63496	63969	AT1G01130	2.30269	2.12236	2.4206	2.41713	1.62298	1.41144	1.8692	0.756004	1.10973	1.25885	1.17215	1.00569	1.16869	1.59177	1.89001	2.16398	2.53504	1.51201	2.35124	2.64948	2.07728	2.11889	1.23804	2.65295	2.50383	2.09462	3.32225
Peak_12	Chr1	65830	67727	AT1G01140	4.19608	5.38605	5.91608	7.65167	8.42506	8.59308	9.09454	8.82865	8.9984	4.9331	6.44264	4.90278	6.55697	7.29139	6.64011	7.3728	7.83528	6.8904	4.15191	4.66462	4.00641	4.54943	4.93743	4.9842	4.82744	3.46599	5.47698
Peak_24	Chr1	129195	130686	AT1G01320	5.24206	7.4907	7.85758	7.61409	9.57077	9.00668	10.0522	10.9865	11.295	7.20975	7.47306	6.89135	6.68313	8.40623	7.36179	7.47858	7.43781	6.72279	5.77088	6.63244	6.55532	6.42532	7.48629	6.68643	4.55126	5.28172	4.8884
Peak_37	Chr1	190488	191442	AT1G01520	2.56466	5.63363	11.0435	6.53212	3.81944	4.73858	4.60089	5.25496	4.1	1.87271	0.306381	0.45613	0.351134	0.438917	0.78833	0.979388	0.790051	0.934636	1.28749	1.27372	1.75567	0.526701	0.526701	0.790051	1.78149	1.49232	2.64211
Peak_39	Chr1	199734	201039	AT1G01550	5.95213	6.30329	7.07484	7.40083	7.93197	8.93888	7.33538	8.56381	8.31711	5.32532	4.68593	5.84136	6.2391	5.17806	7.13021	5.15666	5.59719	5.85899	5.67522	6.38761	5.18561	6.34986	7.03582	5.72054	4.58146	7.19441	6.09813
Peak_64	Chr1	325247	326195	AT1G01950	6.44871	8.6156	8.79055	7.74261	10.4724	10.0013	9.80211	9.87832	9.62369	7.33209	8.49608	8.41813	7.80843	8.30208	8.32287	9.21492	7.98857	8.36098	5.31243	6.04685	5.38864	8.30382	9.2842	7.67159	6.94063	7.76166	7.14502
Peak_98	Chr1	486996	487507	AT1G02400	2.54595	3.09816	3.22016	2.35974	3.79484	3.94252	2.85416	3.09495	2.01621	1.39658	0.642105	1.31952	0.982421	0.98242	1.14616	0.950315	0.542579	0.622842	2.18958	1.49931	0.654947	1.8011	0.97921	1.8011	1.14616	0.654947	2.18637
Peak_103	Chr1	537745	538736	AT1G02560	7.69532	8.52384	8.4559	7.77486	11.0541	10.4758	12.1064	12.3748	12.6814	8.96958	10.8719	10.2223	6.41939	8.8801	8.48407	7.81628	7.83451	6.95462	8.00849	6.39122	6.55527	7.91073	8.95467	7.92399	4.73252	9.01598	7.10375
Peak_106	Chr1	573531	574982	AT1G02660	4.84759	3.85022	4.68344	6.76761	7.50233	6.95553	8.20083	10.5635	8.78272	6.51289	5.46571	6.23553	7.0212	5.92873	6.36911	6.25591	6.62836	6.2944	4.58042	3.92607	4.31777	5.85741	4.36872	5.47024	5.31174	3.29211	4.38796
Peak_160	Chr1	875435	876002	AT1G03502	2.96634	3.82007	5.14842	5.62593	2.05473	4.18182	3.98503	4.1934	3.68984	2.98081	2.32966	3.16892	3.39466	2.21101	2.50909	3.09947	2.65669	1.91872	1.32834	2.13577	1.79138	2.89978	3.1805	2.67405	2.2139	2.21391	2.96924
Peak_165	Chr1	896727	897503	AT1G03590	3.2368	3.86724	3.79108	4.09572	3.67684	4.38555	4.14015	3.90321	4.14226	2.69734	2.71849	2.96178	2.47732	3.96032	2.32077	3.84609	3.55625	2.8285	3.34893	2.27422	2.48155	1.82996	2.37366	2.0669	3.66838	4.57807	2.21499
Peak_167	Chr1	900840	902177	AT1G03610	5.48667	6.47196	7.74596	9.0089	9.00398	8.80372	7.45602	8.3418	8.01992	7.50147	6.48792	6.50021	7.32211	6.75206	7.6833	7.04569	6.89212	6.91915	5.33801	6.2029	6.77663	6.49653	5.60092	5.59847	5.725	5.43015	6.04811
Peak_179	Chr1	982374	983538	AT1G03870	9.74844	9.82182	10.8137	10.0349	12.2586	9.95726	6.6711	7.48383	8.11029	7.28205	9.4733	9.32797	5.84568	5.94586	7.1861	7.99742	9.06694	8.16392	8.6253	7.30886	6.16173	10.4963	9.55655	10.1562	9.08951	10.6063	9.24895
Peak_182	Chr1	995979	996793	AT1G03910	5.34685	6.58121	5.28231	7.11771	7.59571	5.95596	6.97249	8.22701	8.10397	5.91159	6.97652	7.06123	6.58322	7.27502	6.42187	5.31458	5.38114	5.23996	6.65179	4.73169	4.86077	6.97451	9.85265	6.62558	5.65947	6.79702	6.40371
Peak_191	Chr1	1042455	1043813	AT1G04030	2.99486	3.21863	1.82764	2.60418	2.54733	2.63562	2.15543	2.13971	1.69943	1.38252	2.22075	2.15906	2.28244	2.77593	2.60901	3.14606	2.82916	2.66949	3.26217	2.02117	1.82643	3.29604	3.87542	3.97461	3.48836	3.32628	4.30602
Peak_198	Chr1	1086149	1086863	AT1G04160	2.46223	2.46913	3.30597	3.63473	3.77956	4.1658	5.23254	2.95192	4.90837	2.90134	2.79789	3.03239	3.59105	2.92203	3.29217	2.46223	3.52438	3.04848	2.34498	2.55649	2.79789	1.88518	2.67604	2.02772	2.24613	2.46223	2.076
Peak_205	Chr1	1128111	1129476	AT1G04230	4.1552	6.27672	7.96022	7.71113	7.40547	8.93373	3.4404	4.17806	4.4801	4.29599	4.96265	4.60285	3.49696	4.04328	4.32487	4.17325	3.25268	3.74365	4.51861	3.53186	3.53065	4.32006	4.94581	5.19129	5.21656	4.39708	4.29599
Peak_206	Chr1	1136323	1137493	AT1G04250	1.85716	2.92401	3.98243	3.54727	2.83417	2.95769	2.64887	3.26793	2.60395	1.81224	1.73644	1.64098	1.40656	1.14546	1.6466	1.57501	1.48938	1.31531	1.14546	2.57728	2.64887	1.3869	1.57501	1.57501	1.91892	1.28864	1.874
Peak_223	Chr1	1231572	1232365	AT1G04520	3.10332	5.85677	6.08036	7.97258	7.24178	7.0037	4.25853	4.6436	4.74711	4.63118	1.47817	2.21725	3.61675	2.85075	2.69548	3.78237	4.31029	4.41794	4.37446	3.76167	3.74924	3.06192	4.24818	4.04529	4.80922	4.84856	3.69542
Peak_225	Chr1	1234976	1236079	AT1G04530	4.99092	5.67733	7.41641	6.42477	7.59805	8.19214	6.03467	7.2824	5.99447	3.82955	4.14669	3.87273	2.64138	3.56154	2.9615	4.12734	4.05289	3.44838	3.34862	2.9615	3.71341	6.22823	5.61926	5.55672	5.77112	5.17258	4.70802
Peak_227	Chr1	1240299	1241261	AT1G04550	9.16118	8.06703	9.25677	12.6348	11.6141	9.64082	8.72932	9.52647	8.91196	9.36259	10.7196	8.43572	7.09577	7.95436	7.40302	7.21526	8.63885	6.79364	7.73246	7.2989	8.67981	9.02121	10.6957	9.93955	9.62375	10.8886	9.97026
Peak_260	Chr1	1425544	1426383	AT1G05000	5.51452	4.38735	2.15649	3.46957	4.63	4.71611	2.11931	1.54007	2.01951	2.63984	3.95488	3.99401	2.07235	1.99603	1.39722	3.08015	3.0371	3.88834	5.37166	4.11534	2.79444	5.77283	5.22881	5.17206	6.38729	5.44407	6.37555
Peak_301	Chr1	1706970	1707710	AT1G05690	3.03912	3.60036	3.15004	5.38391	3.35413	5.33288	5.17982	4.16826	4.20153	2.97479	3.59814	2.62429	3.25874	2.71524	2.44461	2.91046	3.26983	3.70241	2.60211	1.87893	2.09633	4.94468	3.89984	4.12611	3.64473	3.74012	2.69972
Peak_302	Chr1	1714948	1715826	AT1G05710	3.34555	4.14033	2.45914	3.82616	4.25814	5.07536	2.72095	3.41474	2.81445	1.04911	3.29319	2.17302	1.40629	1.75038	1.52597	3.34368	2.88177	3.21652	2.71534	2.47971	1.04911	2.37312	2.81258	3.00333	3.33433	2.86307	3.24269
Peak_315	Chr1	1772023	1773430	AT1G05870	7.99713	10.3601	9.55336	10.3823	11.7564	10.1709	10.7278	9.39341	10.262	7.34217	6.86585	6.66038	5.95757	6.44556	5.9132	6.25994	6.01594	5.61317	4.98273	8.12087	8.67075	6.84717	8.45477	8.21661	8.56101	11.3127	8.27614
Peak_317	Chr1	1786766	1787596	AT1G05900	4.32607	4.64059	5.44765	5.41006	7.40001	5.59798	5.26171	6.72153	6.73538	5.7582	5.54853	6.2547	5.19841	5.11137	4.92939	4.42696	4.53971	3.79001	5.32698	4.56542	5.35665	5.42193	5.22808	4.75136	4.25486	4.73554	5.78787
Peak_324	Chr1	1828394	1829968	AT1G06040	4.04529	9.80324	14.0061	12.4145	7.34538	7.00828	13.835	14.9663	14.3349	11.925	3.3001	7.4915	12.2277	12.1859	12.2684	8.46525	7.82444	8.14589	3.3001	8.94221	11.208	1.50707	1.80973	1.65005	4.24149	2.8962	4.78838
Peak_344	Chr1	1954709	1955724	AT1G06410	4.37319	6.07361	5.92476	5.92638	6.14155	7.53457	7.18996	7.65106	5.52999	3.91694	7.15598	5.66427	5.11904	6.10758	4.69677	5.043	4.5819	4.78576	5.06727	3.28596	2.98503	5.44262	4.88445	4.92651	3.67102	4.92813	3.83604
Peak_346	Chr1	1965875	1966450	AT1G06450	2.30587	2.68828	2.60837	3.3789	1.60669	0.873262	2.55701	3.15916	1.84641	1.01881	1.98624	1.14437	1.01881	1.1301	0.582175	1.58101	1.16435	2.33155	2.86521	1.52678	1.46685	2.06901	0.873263	1.89207	4.27499	4.00103	4.40341
Peak_358	Chr1	2029901	2030645	AT1G06630	4.38859	5.06375	5.06375	5.93309	6.2839	5.99045	6.91715	6.40305	7.46434	3.58986	5.30646	5.40133	4.82546	5.96397	5.42119	3.93847	5.17628	5.96398	3.48395	3.71342	3.66708	4.75265	5.18511	4.9777	3.95171	5.1829	3.14195
Peak_359	Chr1	2032404	2033503	AT1G06640	1.85001	1.8261	2.6734	2.9364	3.17102	4.61157	3.18148	2.49557	3.2278	1.2956	1.67666	2.31326	1.91128	1.89932	1.71552	2.70627	2.51799	2.54787	1.83058	1.2956	1.3763	2.05772	0.712807	1.53171	1.75288	1.60344	1.52424
Peak_383	Chr1	2152763	2154020	AT1G07010	8.15492	10.4364	11.0387	9.76473	10.1123	9.81177	9.89801	11.0623	11.1629	6.664	8.37313	6.51243	5.11561	5.48931	4.93136	6.64702	7.42972	7.04948	7.36438	4.72883	6.3308	8.27121	10.0261	8.89841	6.3308	8.44631	6.45102
Peak_393	Chr1	2189821	2190702	AT1G07135	3.99206	3.74232	5.92845	5.09537	5.88185	5.25565	6.53415	6.65343	6.11668	2.557	3.04157	2.36877	3.32672	4.29957	3.03225	2.58869	3.83551	3.13662	2.66137	1.52078	1.92893	2.26254	1.42574	2.16749	4.33498	2.59801	3.8821
Peak_397	Chr1	2204234	2205235	AT1G07180	4.00284	7.85147	10.1662	6.34548	6.68342	5.73357	5.4186	7.01809	5.60561	3.04314	1.25499	1.52403	0.836659	0.585661	0.45442	1.4781	2.09165	1.45677	2.09165	2.16711	2.31476	3.08251	3.1793	3.6813	4.9166	5.46289	5.77294
Peak_398	Chr1	2210912	2212568	AT1G07200	11.5988	10.2466	10.5274	9.63556	13.3408	12.6454	7.13367	9.46096	6.92633	7.39953	12.3805	10.073	7.20509	8.82507	8.21993	9.71393	11.4966	9.50064	9.74964	8.06121	6.66642	13.7525	15.2772	15.2643	10.1941	12.4519	9.207
Peak_419	Chr1	2301356	2302051	AT1G07485	4.81564	4.33384	3.51431	7.39705	5.07307	4.91011	4.13545	3.36788	4.1449	2.14212	1.6863	2.90025	3.11517	1.46429	2.77035	4.27716	4.39288	3.49305	3.03723	2.65935	1.69338	4.18741	3.6135	3.6135	4.59599	3.25215	4.13309
Peak_420	Chr1	2305452	2306221	AT1G07510	4.66238	3.59926	4.52789	5.55259	8.0695	7.09604	5.91337	7.06189	8.24456	5.32416	5.55259	5.56113	4.89934	3.99633	4.84597	6.62426	5.23451	5.05092	3.44128	3.74442	2.98444	4.197	3.215	4.10093	3.48398	4.2461	4.20553
Peak_421	Chr1	2309830	2310843	AT1G07520	2.32141	3.52264	3.72852	2.66021	2.64562	3.01685	2.29385	1.12504	1.57084	1.48168	1.56922	1.40387	1.48816	1.66486	0.992109	2.46406	1.77348	1.55463	1.55139	2.14471	1.35037	2.56133	3.02658	2.76559	1.74592	2.51756	1.65351
Peak_424	Chr1	2332500	2333600	AT1G07570	3.198	2.89343	2.58886	3.27414	5.40315	4.68651	1.278	1.90357	1.811	1.01822	1.67514	1.70351	0.913714	0.989856	1.14214	0.965969	1.67514	0.913714	1.98718	1.599	1.37356	2.55452	2.26935	1.84086	2.93523	4.5611	3.47719
Peak_426	Chr1	2338662	2339353	AT1G07590	2.28515	3.33509	3.73653	2.37542	4.00258	3.47998	2.86238	3.76979	3.18543	0.672243	1.83857	1.30173	0.121146	0.807641	0.363439	0.959669	0.96917	1.09032	1.44663	1.45375	1.78631	2.81012	2.08324	2.88851	2.24239	3.02866	3.02153
Peak_428	Chr1	2346223	2346717	AT1G07620	3.33075	2.02236	1.96591	2.62674	2.64334	3.21784	1.47443	1.80651	1.28514	1.18552	1.0859	1.01616	0.67744	0.67744	0.67744	1.01616	1.01616	0.67744	0.97299	1.12242	0.315474	2.5404	1.86296	1.86296	1.80983	3.16139	2.34115
Peak_432	Chr1	2373838	2374689	AT1G07670	3.7429	4.05738	5.31337	4.8214	6.14684	6.28961	5.51402	6.88578	5.41177	5.22848	6.40537	5.73203	4.8812	5.14359	5.89603	3.41491	4.8214	4.89664	2.83032	6.16999	3.47858	5.69924	4.75387	4.55129	4.04773	3.37247	3.26056
Peak_433	Chr1	2379543	2380272	AT1G07700	5.45152	4.69943	5.25562	7.79111	8.05006	5.94466	8.87871	7.09081	8.8089	6.27116	5.72849	6.52561	4.29862	4.50353	3.88429	5.28264	4.55532	4.47876	4.25809	4.18828	5.51232	5.41775	5.45378	5.96493	5.00567	4.99892	5.11601
Peak_478	Chr1	2635143	2636648	AT1G08350	4.06363	4.90299	5.51532	6.01195	6.49656	7.37849	6.54459	7.06633	6.44745	4.34196	6.57406	5.74343	5.39307	5.86568	5.57534	4.30922	4.87133	4.67923	4.28847	3.86388	5.15184	5.33631	5.39853	6.06761	2.93611	4.07345	3.88353
Peak_483	Chr1	2671035	2671918	AT1G08450	4.51298	4.41815	4.63571	6.98238	5.46132	5.22702	5.87413	7.81729	6.03218	6.4766	5.95594	5.90388	5.84438	6.10842	5.69375	4.5074	5.08756	5.16752	4.82909	3.45307	3.63344	5.58591	5.86297	6.03033	4.07786	4.64686	3.88819
Peak_499	Chr1	2750529	2751378	AT1G08640	6.37983	6.56935	6.80529	8.16093	7.79929	7.954	9.855	10.6827	9.75636	8.09324	8.80877	6.3779	7.62718	8.60958	8.04102	6.28121	4.62001	6.66025	7.13404	6.80141	7.42799	6.65251	6.62737	6.61963	5.81901	5.91571	6.31215
Peak_518	Chr1	2873427	2875554	AT1G08930	5.68065	6.34805	6.75514	6.94207	9.81329	8.95895	6.28703	7.46503	6.83238	5.52693	5.37862	4.86339	6.14567	5.03024	5.27897	5.08431	4.97926	5.98809	5.84054	5.19941	4.49415	4.89352	4.65251	5.00089	4.56985	4.84331	4.29409
Peak_527	Chr1	2925095	2925890	AT1G09060	5.05527	6.52972	6.5607	6.16834	6.34799	5.83173	7.16163	7.14098	6.41614	5.16058	5.7037	5.11928	5.19569	4.59269	3.9009	4.26848	5.76359	5.68718	3.07694	4.41716	3.99589	2.78577	3.40322	3.31236	4.78887	4.99745	4.83637
Peak_528	Chr1	2927648	2929043	AT1G09070	6.83892	8.60752	10.2831	10.1394	7.85627	8.1895	10.9213	9.83565	11.2722	6.53983	7.46652	7.49478	8.1377	7.63019	8.87834	9.17272	9.31402	10.143	5.84746	4.62404	4.52748	5.58488	4.55221	5.69321	8.16242	6.02291	7.48536
Peak_533	Chr1	2954870	2955799	AT1G09160	4.97909	7.17788	7.94498	9.94227	10.4089	9.23349	8.11289	9.80441	9.98469	5.9088	7.64626	7.91846	6.56809	6.72185	7.16904	5.94946	6.56632	6.80493	5.32552	5.74972	4.68038	7.59324	8.02275	6.94103	4.86773	6.85089	5.31845
Peak_548	Chr1	3037818	3038377	AT1G09415	2.3923	2.63593	2.43046	4.08893	4.06544	2.54787	3.76897	2.60364	3.89225	1.74652	3.65156	2.92066	2.84141	3.58404	2.83847	2.27195	2.85608	2.23673	1.52931	2.32479	0.898213	2.18389	2.46275	2.43927	3.27877	2.8825	2.99404
Peak_553	Chr1	3076487	3077355	AT1G09530	2.72199	3.81344	3.33865	4.95596	3.52024	3.37648	6.87213	5.67287	6.24223	3.80209	3.47295	4.39604	4.00827	3.80209	4.41874	4.51711	3.1249	5.05621	3.54105	3.33297	4.23715	3.664	3.52024	2.9906	2.89413	2.84305	2.60471
Peak_555	Chr1	3099569	3100693	AT1G09570	4.68736	4.62014	4.15988	5.68386	6.04768	5.79782	4.32645	5.06725	4.99273	3.64556	4.66836	4.94013	4.08536	4.58653	3.23205	3.70693	3.32849	3.43954	4.84662	3.94947	3.15753	4.88461	4.69612	4.62307	3.65725	4.77649	4.8057
Peak_570	Chr1	3166657	3168010	AT1G09780	8.2493	6.23766	7.45775	6.44404	11.1459	7.84988	5.44854	5.19724	5.40605	5.06733	10.9141	7.97006	5.3757	5.30164	6.01063	4.23937	5.37449	4.84881	9.03719	5.72169	4.70313	11.7372	11.9326	11.844	6.20002	7.55973	7.86323
Peak_584	Chr1	3238166	3239510	AT1G09940	6.28062	6.83058	6.59227	7.4881	8.68947	8.93756	7.88896	7.6042	8.76157	5.11102	5.73798	6.05207	5.15869	5.65732	7.23022	5.03158	5.93597	5.44711	5.17335	4.53783	4.45473	4.56961	4.98636	5.85898	3.9402	4.71749	5.24912
Peak_603	Chr1	3340966	3341710	AT1G10180	5.06596	5.05493	5.27998	5.88013	6.67665	6.02796	7.03189	6.43836	7.29003	4.43712	7.51288	6.65017	5.60653	3.86345	5.73892	5.63522	3.9142	5.06155	4.93578	4.04217	4.03335	4.83649	7.31431	4.37093	3.24565	3.97378	3.42658
Peak_615	Chr1	3397167	3398419	AT1G10370	2.03867	4.74377	6.42429	8.42229	3.49223	5.35117	5.92577	7.34261	5.97037	2.34302	0.66906	1.81564	1.53884	1.27121	0.936684	1.0705	1.67265	1.29614	1.76055	2.89926	3.39253	2.55161	2.03079	2.28792	2.77463	3.19968	2.60933
Peak_635	Chr1	3553977	3555062	AT1G10700	7.56506	7.5363	9.50401	7.48787	8.09634	8.50653	9.52671	9.92176	9.4374	7.85113	9.03326	9.44043	8.28706	8.97272	9.46465	6.79312	7.81027	8.04791	6.9475	7.32742	7.64074	7.64831	8.33701	8.07666	6.25275	6.4359	8.02217
Peak_639	Chr1	3569576	3570878	AT1G10740	8.38421	7.679	7.76353	10.5515	8.87116	11.0498	7.76479	8.94307	7.1214	5.90275	7.44814	7.09743	5.88509	5.43472	6.88423	5.99485	7.90356	6.75934	7.45949	5.81444	7.86066	8.73113	9.28747	9.83246	6.72275	6.94857	6.59912
Peak_658	Chr1	3681715	3683018	AT1G11050	7.88741	10.2283	10.6695	10.9292	12.7507	12.7255	11.2506	12.5944	13.144	9.57279	10.0493	8.63871	8.74334	10.6481	10.0518	8.39164	10.0001	9.43162	8.17482	8.45214	6.87895	9.83626	9.70768	9.4001	7.11972	7.09073	6.69743
Peak_678	Chr1	3810345	3811318	AT1G11330	4.23098	3.85632	3.06987	3.57954	5.706	5.27902	2.56019	2.37286	2.17709	3.05299	4.06897	4.18879	3.12725	2.71377	3.06649	3.62849	2.98717	2.8741	3.17113	2.85385	2.32223	4.6259	5.74989	5.55749	4.7491	6.04185	5.02081
Peak_691	Chr1	3879582	3880336	AT1G11545	3.21138	3.22879	2.87609	3.08292	4.61567	3.26145	2.21639	2.64748	3.08945	2.14454	2.03568	1.27584	2.69756	1.36946	2.18591	2.16196	2.88697	2.33179	2.30348	2.76505	2.88044	2.43194	3.07421	2.32743	2.7411	2.49072	2.34267
Peak_700	Chr1	3951301	3952060	AT1G11710	4.63289	5.39206	5.14117	5.88736	6.74602	4.42525	4.86864	4.47284	4.89459	3.99267	3.84344	2.83121	3.60336	4.48581	3.77639	3.73313	3.18592	3.79585	3.87372	3.75476	3.24864	2.86798	2.00283	3.1989	3.41951	2.31428	2.7382
Peak_707	Chr1	3992535	3993610	AT1G11820	5.66313	6.59196	7.08846	7.76675	7.24733	7.21983	8.94918	7.16331	9.71301	5.47522	7.08998	7.45662	6.92041	6.34447	7.10067	5.82965	6.62251	7.38483	5.62646	5.36828	5.06122	7.95771	6.94944	6.3567	5.74409	5.87089	5.04288
Peak_718	Chr1	4042330	4044010	AT1G11960	2.34883	2.54342	3.54671	4.82869	6.53897	6.80397	5.40368	5.60023	5.30491	2.91892	3.03333	2.91403	3.7902	3.35407	3.95937	3.86061	3.64156	4.14321	2.08383	2.59329	1.99484	2.43097	3.43426	2.97857	2.67641	2.07992	2.59329
Peak_743	Chr1	4208330	4208929	AT1G12370	2.59993	2.36432	2.34788	2.54513	3.35333	2.43555	2.86019	2.09583	2.80266	1.81639	1.62735	2.18624	1.90953	1.41092	1.63009	2.73691	2.43555	2.1561	1.90953	2.6602	2.38075	2.6328	2.07391	3.23552	3.22456	3.07389	3.66565
Peak_748	Chr1	4227420	4229107	AT1G12420	2.78022	2.12485	1.47922	2.16575	3.70534	3.00517	2.1453	1.29127	2.03331	0.844291	2.11219	1.19389	1.62918	1.40423	1.24161	1.98754	1.19778	1.98365	2.48516	1.5766	1.40326	1.43345	1.48408	1.37307	3.17267	2.88053	2.87176
Peak_756	Chr1	4270238	4270930	AT1G12530	4.99778	4.52813	4.85309	7.18476	6.09601	8.22368	6.16955	6.96416	5.99876	5.56468	7.01397	6.18377	5.0808	6.71984	4.02764	5.13536	4.74872	3.82602	5.23735	4.51152	4.27195	4.52813	5.58366	5.0049	3.26623	5.07131	4.6823
Peak_763	Chr1	4325710	4326385	AT1G12700	3.84442	3.4432	3.58424	4.52771	4.69793	4.18485	6.69431	3.96844	6.96908	4.0657	3.43347	3.21949	3.72284	3.38727	3.96357	3.69853	3.1587	3.31433	4.09245	4.46449	2.4365	5.86512	4.22376	5.80676	5.20857	4.83653	3.66934
Peak_789	Chr1	4459132	4460744	AT1G13080	6.08192	7.45667	7.94991	7.16623	6.44471	8.89357	8.70097	7.28648	8.53486	5.85364	3.22235	3.66362	2.27257	3.98973	2.91153	3.22236	3.80222	4.14565	4.26182	4.98945	6.83706	5.41238	5.5418	5.62638	6.98992	6.20828	8.39422
Peak_801	Chr1	4512363	4513980	AT1G13210	5.44035	5.87213	6.39229	6.68285	8.93213	8.63751	7.58805	8.02896	7.88266	6.3486	7.39095	6.61985	7.21317	7.12173	7.45394	6.27444	5.71364	5.95645	7.18268	5.87822	4.79116	5.80101	6.06617	6.01029	5.81625	6.10782	5.82133
Peak_811	Chr1	4589730	4590566	AT1G13380	5.60891	4.31666	5.58535	6.84421	6.60068	7.10541	5.90939	6.99347	5.79155	4.19097	6.00955	4.22632	4.79979	5.53428	5.54999	4.407	3.97691	3.7707	4.57982	5.29861	3.67839	6.07632	7.18593	5.39681	4.72515	5.30844	4.60732
Peak_812	Chr1	4592765	4593805	AT1G13390	4.79557	5.34981	6.79938	6.45357	7.8147	7.49416	6.76938	5.94354	6.16144	5.18243	5.56772	4.91241	6.30988	6.2704	4.78293	5.2077	4.16079	5.80932	5.52035	5.79826	4.67082	7.16572	7.09308	6.60358	6.35251	6.14881	6.20092
Peak_852	Chr1	4847108	4847709	AT1G14180	2.95445	4.63647	5.43106	3.97568	5.51297	4.71838	5.15254	4.73477	4.0767	3.85007	2.51483	4.03848	3.59613	4.18592	3.17835	2.32096	2.89165	3.01452	3.0391	3.88556	3.50602	4.11493	4.06032	4.47537	4.65831	3.82276	3.87737
Peak_853	Chr1	4854201	4855329	AT1G14190	6.31163	7.41525	6.75715	9.43177	9.20609	8.98187	7.99327	7.84476	7.10076	8.1971	5.20363	6.88236	6.31163	5.57345	6.92604	6.83577	6.16166	6.66397	4.22522	6.94497	6.14855	4.95321	4.5499	5.18179	6.12817	5.42057	5.49482
Peak_858	Chr1	4877585	4879231	AT1G14280	8.55928	10.0963	9.96154	9.89268	9.18006	8.40158	8.44949	7.8327	8.44949	6.82067	4.54013	4.83555	4.07205	3.82552	4.02214	5.63699	5.09105	5.63898	4.12294	6.82067	8.61816	6.12104	6.73784	6.57615	8.90759	8.61018	8.58223
Peak_860	Chr1	4884249	4885618	AT1G14300	3.35357	2.91563	1.98694	3.69433	4.53181	4.40583	5.25772	3.8863	4.40103	3.61153	3.69672	4.26665	3.30438	3.73032	3.48075	2.99602	2.05534	3.32717	3.23358	3.0896	3.18199	2.71285	2.90003	2.89523	2.74045	2.81484	2.81484
Peak_912	Chr1	5168574	5170542	AT1G15000	3.60315	3.86612	3.95962	3.95545	4.05312	3.25418	4.14746	4.41293	4.49975	4.45885	3.84024	4.05228	3.51298	3.85944	3.04297	4.07065	4.25014	4.10071	3.48042	3.27839	3.75091	2.90021	3.57643	3.03462	3.53385	3.87447	3.06551
Peak_913	Chr1	5171394	5171661	AT1G15010	2.68036	2.93183	1.11017	3.00544	2.42888	1.57019	2.28781	2.07927	3.44705	1.32484	0	1.77259	1.25124	1.25124	0.625621	0.368012	1.56405	0.938432	0.828027	0.748291	1.16537	0.0613354	0	0.0613354	1.75419	1.45978	0.625621
Peak_915	Chr1	5177440	5178621	AT1G15030	8.22729	8.32046	10.0129	9.64022	8.37052	10.5622	8.82528	10.1979	9.33427	7.13699	9.39268	7.33168	7.37619	7.07719	7.6279	8.12021	7.14812	7.00488	8.12159	6.15099	6.28867	9.554	8.92263	7.89909	6.15516	8.37331	7.73081
Peak_925	Chr1	5223604	5225312	AT1G15175	3.82621	5.78837	6.60978	7.30327	5.89898	6.00189	7.36194	5.80953	6.38663	6.06345	4.86403	4.95445	6.3347	5.00158	6.37605	4.85057	5.29783	5.46711	4.48026	5.05256	5.28628	4.16959	4.94291	4.16959	3.40684	4.10514	4.21864
Peak_934	Chr1	5262779	5265100	AT1G15290	4.48467	6.41092	7.17052	7.20308	6.37198	6.57232	7.17689	6.82364	7.32201	4.10805	4.18805	4.3537	4.04647	3.90913	3.97426	4.61493	3.28545	4.15124	3.45818	4.32468	4.40113	3.50208	5.37382	4.54838	3.30032	4.33247	3.32156
Peak_942	Chr1	5299008	5299719	AT1G15410	2.6827	1.75691	2.11014	2.04088	3.4261	4.278	2.08937	2.43798	2.63191	2.44259	2.58573	2.00163	1.21437	1.45909	2.47261	0.909625	2.00164	1.57684	1.41292	2.58342	1.80309	2.8143	2.64345	3.88553	2.41489	3.65004	2.32947
Peak_953	Chr1	5345600	5346001	AT1G15550	1.54156	1.4148	2.3471	2.20399	3.33255	2.64969	1.39845	1.33711	1.0427	1.20626	0.41708	1.66832	1.2676	0.0736024	0.535662	0.834162	1.84824	1.23898	2.02407	1.15719	2.91956	2.15492	1.48023	1.7133	4.85367	1.45978	3.78644
Peak_954	Chr1	5362016	5362675	AT1G15570	1.2702	2.48063	2.07715	3.28011	4.26887	3.87037	3.29754	4.1817	3.46441	2.5404	3.56403	3.30252	1.77828	2.48312	3.06591	3.19792	2.86916	3.50675	2.27889	2.65746	3.03105	1.66371	2.08213	2.22161	2.15934	1.9576	1.59398
Peak_976	Chr1	5478633	5479441	AT1G15950	6.11798	5.59579	6.66456	7.7191	7.69471	8.78583	6.61986	5.89244	6.42073	7.59922	4.19379	4.26084	5.72786	5.50842	4.61236	3.5883	4.1938	4.79929	5.37634	6.70519	6.87587	5.86197	5.50842	4.91105	5.07766	6.57109	4.66316
Peak_987	Chr1	5538931	5539895	AT1G16170	5.37936	5.02846	3.98598	4.49189	5.12044	5.40661	4.58387	5.03868	4.67756	4.5992	5.48156	4.50892	2.85662	3.56182	3.90762	3.51754	3.70151	3.53798	4.72014	4.08988	4.34369	5.55481	7.2446	7.58357	3.30802	4.77806	3.56182
Peak_992	Chr1	5561073	5562185	AT1G16260	5.66539	7.08026	8.79494	5.13223	7.19397	7.43914	4.97124	6.24876	7.71384	6.46291	4.95499	7.00493	5.64914	5.99621	5.59154	4.65814	4.48682	5.79535	5.62994	4.07033	4.98305	6.47768	7.33133	6.19116	6.47029	7.47754	6.60026
Peak_1017	Chr1	5722852	5724268	AT1G16720	9.95786	10.3082	11.9717	9.93466	10.5773	10.9091	10.539	10.8639	10.7676	8.66672	8.59827	7.32338	7.15866	7.70736	6.99509	7.39183	7.7468	6.15754	6.44871	6.62619	7.14357	8.29435	11.6689	9.00198	7.69344	10.5309	8.99269
Peak_1018	Chr1	5726701	5727293	AT1G16730	1.94871	2.16769	1.74358	3.13512	2.36173	2.99652	2.71932	2.92999	2.49479	1.78516	0.659733	0.557169	1.36382	0.917527	0.848228	1.27234	2.21482	1.83783	2.56132	1.88495	3.17947	2.65279	1.63824	2.31738	3.04918	2.82743	3.09908
Peak_1038	Chr1	5828893	5830021	AT1G17050	6.31745	7.11095	8.10538	9.13621	9.21191	10.3083	7.72246	8.46792	6.99447	4.50476	7.90154	6.18495	4.82654	3.60352	4.1597	4.70569	5.99422	4.45526	4.79013	4.63726	4.94156	7.17647	6.36404	6.00005	5.83406	7.6482	6.60281
Peak_1063	Chr1	5955740	5957213	AT1G17380	3.52734	4.2801	4.69606	6.82496	6.95766	5.04734	5.25366	5.72315	5.87593	1.8356	1.87909	2.38873	2.47684	1.64936	2.32628	2.71103	2.12444	3.07123	1.75642	1.54342	1.20552	2.22257	1.15534	2.38985	2.86938	2.04749	2.86157
Peak_1065	Chr1	5977385	5980174	AT1G17420	2.55877	4.83769	6.0396	6.04137	5.9795	5.98244	6.34008	7.25624	6.55983	3.24516	1.62258	2.0132	2.82449	3.48672	2.90756	3.21275	3.34237	3.3082	1.74454	2.03735	2.25888	2.13339	1.45938	1.71272	2.43387	2.11159	2.28422
Peak_1070	Chr1	6002841	6003551	AT1G17470	4.0274	4.32564	3.77309	4.64931	4.57532	5.58564	6.29772	6.6029	6.42488	5.54171	6.45031	5.31977	3.85863	5.44461	5.65962	4.12681	3.66442	4.39268	3.89099	4.55221	4.33488	6.14514	5.31052	5.08395	4.0089	4.71636	3.72684
Peak_1090	Chr1	6106395	6107279	AT1G17750	2.8418	3.30058	3.43245	4.09183	3.67763	5.08367	4.07325	4.5246	5.02052	2.47404	4.2497	3.02197	3.43803	3.59962	3.39902	3.51975	3.49003	3.59962	2.05984	2.8418	3.39345	3.12599	2.41275	4.22742	2.86966	2.6635	2.27344
Peak_1107	Chr1	6212678	6213487	AT1G18060	5.17895	6.21393	5.17489	5.49756	8.61669	7.53301	7.65275	5.71876	6.88159	4.03032	6.19769	4.90092	4.45041	4.46258	4.19876	4.61073	3.47225	4.8441	4.48693	3.39513	3.51892	6.12667	7.40923	6.72736	5.31086	5.37783	6.06781
Peak_1121	Chr1	6299601	6301113	AT1G18300	5.43874	5.31923	6.48933	8.71002	7.1325	8.1255	9.40425	7.12707	8.72413	3.76778	4.07959	4.32078	6.81526	6.15361	6.44369	6.74138	6.31658	6.40893	2.88125	3.73845	4.38054	3.48531	4.37728	3.71238	5.8179	3.49074	4.70973
Peak_1129	Chr1	6331443	6332196	AT1G18400	2.81232	1.73317	1.5435	2.02094	3.64947	3.32464	1.64379	0.874217	1.82692	1.32985	2.26293	1.96644	0.967961	0.289952	1.35602	1.30587	0.778293	1.24919	3.61023	2.68151	1.21649	2.32398	2.23241	2.33706	1.55658	2.21497	1.84436
Peak_1131	Chr1	6347980	6348792	AT1G18450	6.02723	6.4963	6.86226	8.65769	8.44337	9.07419	6.95931	8.24927	7.9379	6.654	7.95609	8.34227	7.42435	8.01675	6.16269	5.73001	7.12511	7.03817	5.08705	5.8776	5.68552	6.11821	8.54042	6.77128	5.47727	6.46395	7.53959
Peak_1158	Chr1	6463941	6466498	AT1G18740	5.6845	5.66265	6.81356	7.12973	7.33793	7.42018	9.48681	9.92378	9.46303	4.66854	5.71085	5.52192	7.25503	9.16293	7.08088	6.64906	7.10017	6.52632	5.34456	5.29958	4.99627	5.37605	5.48786	5.60161	5.04832	4.34145	5.65365
Peak_1171	Chr1	6565497	6566400	AT1G19010	3.71125	4.55133	5.08411	5.67689	5.6787	5.91145	5.80236	5.87327	5.68052	4.91863	4.88954	4.74953	5.07138	4.33131	4.35858	4.6477	4.30767	3.68762	5.48414	4.05674	3.34758	5.65689	4.90409	4.53133	4.89681	4.59497	4.82226
Peak_1173	Chr1	6577609	6579301	AT1G19050	6.55088	6.44214	7.19461	7.39851	8.63158	9.09084	5.64792	5.79647	5.46052	4.84689	7.49657	6.11299	3.49633	3.16912	3.59633	4.54299	4.71776	4.06044	6.80041	4.99544	4.53037	7.92281	7.96456	7.74027	6.73438	8.81413	6.99945
Peak_1177	Chr1	6608018	6608754	AT1G19120	6.04879	7.08368	6.71121	6.34097	6.94539	5.91496	5.11872	6.85172	7.32456	5.34621	6.82049	5.89043	6.06886	5.8369	6.44133	4.02806	5.45997	5.4622	5.01166	6.02871	3.84071	4.84661	6.05548	5.21686	4.87783	5.44658	5.16555
Peak_1181	Chr1	6622120	6623571	AT1G19180	3.80268	4.55325	5.48496	6.72799	6.4359	5.76911	4.9959	5.11024	5.61061	3.55248	3.92607	3.40644	3.97475	3.30569	4.40834	2.98984	3.36682	3.18909	3.92947	2.89135	3.0272	3.09059	2.42946	2.88116	3.80607	2.90493	3.46418
Peak_1196	Chr1	6697078	6697518	AT1G19373	2.73592	3.22794	3.32858	2.69865	2.71355	2.46755	2.67255	3.16457	3.95105	1.94944	1.69597	2.68746	2.66137	1.56178	2.393	1.87489	1.52078	0.760392	1.75561	2.08735	2.29608	1.14059	1.76679	1.99417	3.0863	2.37809	2.97075
Peak_1197	Chr1	6698015	6698776	AT1G19380	6.05311	5.69502	4.56896	5.7813	5.9021	6.27099	5.37791	4.37481	5.19023	2.83241	2.97047	3.86786	2.95321	3.28758	3.0244	3.41054	4.46973	3.25953	3.77295	3.1905	2.6814	3.51193	3.36092	3.49251	5.38653	3.52056	3.63057
Peak_1202	Chr1	6733188	6734964	AT1G19450	4.24592	5.94428	7.40954	5.47066	8.63058	7.80267	6.54	6.00071	6.45582	3.71309	2.83061	3.8352	2.37087	2.6419	2.16828	3.12385	1.8399	2.32739	2.75291	3.63261	3.31995	4.36987	4.91102	4.62333	5.30508	6.33742	4.62795
Peak_1205	Chr1	6753264	6754125	AT1G19490	5.70368	7.29217	9.79408	9.80553	6.26241	6.59041	6.62092	6.98134	6.32153	5.64075	4.18193	4.88941	3.89208	3.89017	3.98933	2.80703	3.96645	2.90428	4.56332	3.96454	6.74106	3.68994	3.34669	3.95501	3.59269	4.16859	6.6171
Peak_1219	Chr1	6832268	6834062	AT1G19770	8.27572	11.0248	13.4553	11.969	14.4397	13.0926	12.7263	12.5294	12.4259	10.0413	8.827	9.164	9.58251	9.9598	8.7803	8.16034	8.97353	8.82701	7.38193	6.9964	8.20887	6.6301	8.18872	7.93964	7.18505	7.77846	6.30409
Peak_1266	Chr1	7103813	7106051	AT1G20510	4.6054	8.56327	10.7907	9.51915	12.5923	11.566	12.4932	12.8647	11.1952	6.06564	5.61487	6.15007	8.41497	8.24537	7.57508	7.81956	6.7954	6.87616	4.38074	5.18759	5.91587	4.71773	4.38075	4.15609	4.83959	3.6319	3.89399
Peak_1267	Chr1	7112488	7113240	AT1G20540	5.45528	4.95756	5.53387	5.56007	6.24552	8.10542	7.34793	9.18164	8.41759	6.29791	6.29573	7.01175	5.8897	6.19095	5.98793	4.8113	4.79166	4.46639	4.7982	4.61483	3.40327	5.94427	6.03814	6.0687	4.09965	5.22825	4.56462
Peak_1274	Chr1	7159168	7160468	AT1G20650	5.17648	6.186	6.45513	9.23478	7.97888	7.66806	7.8399	8.75087	7.55814	7.19678	4.83281	6.42732	6.83417	7.51897	7.27386	4.82018	5.41781	5.155	4.06209	6.795	7.86137	5.40012	5.22576	5.89919	2.96412	4.28952	3.6085
Peak_1281	Chr1	7216118	7216806	AT1G20770	4.08442	5.45385	5.1437	4.657	5.02441	5.78069	8.11159	7.49367	8.30483	4.49	7.21453	7.46504	4.98863	5.92622	6.27932	5.37989	4.13691	4.37787	5.20811	3.56671	4.59974	6.55846	3.54763	4.95761	3.21839	4.13691	3.40686
Peak_1285	Chr1	7238704	7239659	AT1G20823	5.78765	7.07208	7.84239	10.6107	7.21135	7.64808	8.99613	9.24889	8.8345	8.5955	5.90801	5.94927	8.06763	8.89812	7.33171	6.83995	9.07695	6.93968	5.84783	6.5528	8.01089	5.84955	4.52042	5.78421	5.69995	5.27869	5.84439
Peak_1288	Chr1	7261024	7261556	AT1G20875	1.85659	2.12181	2.75096	3.99999	3.58364	3.93214	4.07709	2.64302	3.72242	1.71472	0.786428	2.10639	2.26985	2.91441	1.69005	1.9121	2.89899	2.202	1.72706	2.202	1.35389	1.41865	0.786428	1.76407	1.63454	1.92135	1.41557
Peak_1299	Chr1	7366729	7367745	AT1G21050	6.67698	6.56061	6.94852	6.51212	5.41626	6.41514	7.3817	7.04227	7.43018	5.77831	4.45132	4.34626	3.58336	3.2601	3.62862	5.55688	5.02835	5.45182	5.37423	7.115	7.14086	4.71801	4.83762	4.06341	9.40369	7.2637	8.60685
Peak_1300	Chr1	7371572	7372970	AT1G21060	4.07481	3.71527	3.41565	3.35573	5.09351	4.61412	4.50133	4.03721	5.08176	3.23588	5.02536	4.37443	2.79644	3.35102	2.94801	3.09136	3.37923	2.95741	3.63067	2.51679	3.68237	4.26868	4.42495	4.43083	3.69999	4.53893	3.2958
Peak_1301	Chr1	7374173	7375004	AT1G21065	3.22436	4.53425	5.35417	4.77331	5.18623	6.58305	5.74338	6.43883	5.87575	3.92178	5.7335	4.02451	3.55035	5.70189	4.44534	4.1075	3.71236	2.49532	2.6514	2.47358	3.23818	2.97739	3.92968	3.92573	4.15293	3.13742	3.22633
Peak_1303	Chr1	7381630	7382496	AT1G21080	6.34385	6.07652	6.7894	6.40073	8.91096	7.7222	9.3148	9.46648	8.31563	5.05081	7.88336	7.01691	6.18838	6.95434	5.22524	6.49173	7.34681	6.78181	6.05945	4.98255	4.56734	6.50501	6.25284	5.65752	5.17025	6.37039	4.6318
Peak_1321	Chr1	7497034	7497921	AT1G21410	3.88734	4.51672	5.71624	6.88799	6.90095	6.22714	7.68582	6.58071	7.10827	6.22159	5.27752	5.9032	4.74255	4.50376	4.90545	4.69442	4.31495	3.90585	3.72074	5.06649	4.55189	5.77177	5.09241	5.12573	4.69072	4.45748	3.49305
Peak_1323	Chr1	7509001	7509758	AT1G21450	4.44343	4.81643	4.75137	4.51066	5.35641	6.18047	5.25882	7.34067	5.66218	5.85084	5.72723	5.69037	4.61692	5.43448	5.25015	4.35886	4.51934	4.71451	4.44343	4.70149	4.8251	4.71668	4.42609	4.888	4.18971	4.80342	3.88827
Peak_1325	Chr1	7529734	7531157	AT1G21500	4.17989	7.10962	10.0024	8.52369	5.52701	6.1111	11.091	10.209	9.79808	8.39325	5.09759	6.24963	8.10236	9.09162	7.99269	5.03988	5.76942	5.66438	4.82401	6.88798	7.72142	3.30143	3.94325	3.45958	3.17907	3.35568	3.76663
Peak_1351	Chr1	7696505	7697662	AT1G21910	4.97821	5.79301	6.28983	4.30962	6.1493	6.30686	4.85045	5.6326	5.63544	3.01361	4.12224	3.11298	2.09945	2.1179	2.32089	2.46142	3.69214	2.53382	5.0648	2.89579	2.31663	5.19256	4.99524	4.75819	6.00025	4.96402	5.43813
Peak_1380	Chr1	7919085	7920232	AT1G22430	3.81451	4.94712	7.4486	5.98522	6.5594	7.45432	6.87871	6.9861	8.10582	6.71834	6.32601	6.54938	5.81483	6.42051	5.76901	4.92707	5.40675	5.16333	5.01584	5.06882	4.18393	5.88643	4.96573	4.95141	4.52758	4.38153	4.75238
Peak_1394	Chr1	8015182	8016090	AT1G22650	2.86804	3.12663	3.88976	3.76137	4.09952	4.15016	3.45575	4.3545	4.33461	3.35448	3.06515	3.38342	3.49554	3.21705	2.81379	3.7252	3.1411	3.36353	2.94399	3.62031	2.78485	3.11759	2.66551	2.81741	2.30564	2.86623	2.44669
Peak_1400	Chr1	8050731	8051752	AT1G22750	5.48144	6.37411	8.1916	7.5595	7.25229	6.51403	8.30419	8.79154	8.10957	6.97243	5.34472	7.19117	7.94712	7.2153	6.89844	7.56111	5.82403	6.65075	5.742	5.41549	6.84375	6.39019	6.81481	5.50235	4.8043	4.82521	4.17702
Peak_1406	Chr1	8079188	8080005	AT1G22840	6.03459	5.73919	8.47415	6.51286	8.02602	8.6751	8.70123	8.74343	8.64094	7.11571	8.61481	8.49625	5.63269	7.10968	6.55305	5.92206	6.61334	5.95823	6.24157	5.4036	5.64072	7.46336	9.3282	6.66759	6.34004	6.42444	5.82158
Peak_1424	Chr1	8188129	8189031	AT1G23090	3.43321	2.878	2.13529	2.70142	2.97083	3.01816	1.81308	1.67109	2.40106	1.71478	3.34947	1.90046	0.879236	1.25605	1.39622	2.77241	1.8058	1.85677	5.20078	3.01816	1.11406	2.8962	3.83369	3.89922	4.63828	2.97083	3.80638
Peak_1453	Chr1	8432133	8433058	AT1G23870	6.10297	5.71421	4.82841	4.80178	7.42012	8.17456	5.17634	5.9503	6.2077	2.53491	5.16036	4.36509	4.66864	3.9355	3.81835	2.87219	2.99468	3.79172	5.58639	3.36746	2.71598	4.93847	7.4219	5.04143	5.70355	7.75031	6.15622
Peak_1482	Chr1	8631363	8632239	AT1G24330	2.76277	4.25098	6.99688	7.11309	8.48884	7.08122	7.71475	8.40263	6.93502	4.71769	3.90798	4.73643	5.39995	5.45992	6.5714	4.79829	3.59122	4.40281	3.21823	3.42065	4.71769	2.96332	3.68306	2.77214	3.44877	2.23795	2.7384
Peak_1492	Chr1	8710077	8710878	AT1G24580	3.11336	3.34497	3.13591	3.77744	3.33267	4.39846	2.85306	3.6975	3.48024	2.51897	1.24206	1.89179	0.627181	0.627181	0.522651	2.1316	1.35889	2.1316	1.66428	1.56795	1.77906	3.32857	1.98607	3.34497	4.12997	3.61347	3.74464
Peak_1510	Chr1	8911408	8912389	AT1G25400	4.25008	5.29126	8.42484	7.09072	6.96517	6.94843	6.50653	7.79544	6.48978	2.91429	4.15634	4.25343	3.72112	4.01573	5.61097	3.29427	4.14128	4.05758	4.84599	4.4091	2.46736	3.58554	2.75192	3.41982	5.7633	4.95815	5.462
Peak_1521	Chr1	8962059	8962816	AT1G25520	6.22818	6.64455	7.39271	7.89799	7.18886	7.97606	7.07827	7.75487	7.66812	5.8747	8.07364	6.96333	5.5364	5.56893	5.55808	4.74921	4.71668	5.12437	5.6123	6.22818	4.64294	5.03763	5.77278	6.37998	6.76165	7.72451	7.63125
Peak_1524	Chr1	8981802	8983131	AT1G25560	9.95914	9.64397	8.27456	8.52669	8.13119	8.38703	7.8012	7.56019	7.54906	5.69517	8.63545	7.12267	7.23762	7.9149	7.24873	7.02751	8.29681	7.76536	10.8379	6.24639	6.87301	11.0566	9.11376	11.1197	12.3469	9.48948	11.6215
Peak_1538	Chr1	9070941	9072297	AT1G26218	7.9476	7.15418	8.1608	7.96093	9.11775	8.8452	8.38248	9.19044	8.92394	6.71203	7.55028	7.26804	7.33588	7.10451	7.7768	8.2359	7.98637	7.30196	6.54608	6.22992	7.3177	10.0081	10.6877	11.1153	10.0638	9.13714	9.63378
Peak_1552	Chr1	9178299	9180198	AT1G26560	3.05572	4.41833	6.23948	6.04395	4.56281	4.48841	3.99787	4.0965	4.17609	2.5669	1.36261	2.20614	1.54949	1.45605	1.26745	2.02965	2.47087	2.25026	1.63341	1.93534	1.89295	2.02965	2.54874	2.11789	3.17684	3.03755	2.64736
Peak_1554	Chr1	9198901	9199709	AT1G26620	2.38339	2.10096	2.05016	3.2124	3.72646	4.0414	3.93778	6.50201	4.70583	3.31399	3.96013	4.63268	3.52734	3.27335	3.54766	2.3204	1.97092	1.41215	3.21443	3.07423	3.40949	3.43997	3.62893	3.13519	1.38777	1.5869	0.936695
Peak_1561	Chr1	9241257	9242731	AT1G26730	2.95548	2.77271	2.76602	3.49375	3.31432	3.29426	3.68543	4.27831	3.73558	2.1932	2.33919	1.83993	2.01155	2.21661	2.67241	2.44395	1.87559	3.23966	2.75933	2.36594	1.81875	1.36407	1.30723	1.25039	1.78978	2.76268	2.55539
Peak_1563	Chr1	9250470	9251734	AT1G26761	5.37707	6.17103	5.96572	8.38008	7.25736	9.58855	9.60025	9.14544	9.13634	9.27408	6.2295	8.02272	8.16827	7.36651	5.63436	5.75651	5.67335	6.36205	5.0821	7.34702	8.68154	5.69674	5.10289	5.79679	5.10289	5.44724	4.90148
Peak_1565	Chr1	9274059	9275137	AT1G26790	2.81074	2.87473	4.50633	3.93352	3.29062	4.45453	0.903398	0.978047	1.05574	1.11363	0.112734	0.423515	0.0776953	0.233086	0.158437	0.388477	0.621562	0.155391	0.388476	0.991757	1.32082	0.310781	0.0776953	0.310781	3.20836	4.90242	3.2114
Peak_1575	Chr1	9355975	9357106	AT1G26960	3.28322	3.62882	2.73287	4.08769	3.92215	4.48992	2.96521	2.52232	2.05764	2.29578	2.73287	2.78805	1.85144	1.99955	2.36403	3.093	3.41246	3.66948	3.91779	2.2406	2.36839	4.32003	3.9904	3.76532	5.3699	2.6835	4.90523
Peak_1581	Chr1	9407359	9408793	AT1G27100	6.04479	9.7562	11.5191	11.3473	11.3507	11.1766	10.7677	12.1514	11.392	8.81918	8.91082	7.59464	9.44692	9.18688	8.08606	10.3221	10.1067	10.148	6.25327	7.36211	6.13413	7.10208	6.54308	5.75842	8.63246	6.19256	8.31172
Peak_1582	Chr1	9410196	9411218		3.50771	4.48306	5.51143	5.99348	5.41984	5.18042	5.16275	6.29878	6.38233	5.58534	4.85584	4.61964	5.57892	4.50716	5.47769	5.22542	6.92223	5.86012	4.08296	4.26131	4.07492	3.95602	3.38399	3.87407	5.35075	2.89069	3.9753
Peak_1583	Chr1	9421087	9422388	AT1G27120	7.14329	8.71132	9.0926	10.292	9.64684	8.1192	9.09134	9.39308	11.3272	7.84524	5.99187	7.4829	6.82261	7.31372	6.61303	7.18747	6.55496	7.30867	5.1422	6.257	7.91972	7.59779	6.90088	7.02713	5.4452	6.4388	5.89592
Peak_1594	Chr1	9483194	9483849	AT1G27300	3.62836	4.6407	3.65843	4.07189	5.02909	3.91652	3.34521	4.59309	3.3402	2.76136	5.32477	4.10696	4.00924	2.73129	2.86911	3.54567	2.91171	3.03449	3.22243	3.13973	4.37508	4.7284	6.79817	5.43753	5.10176	5.29972	3.85639
Peak_1628	Chr1	9674440	9676290	AT1G27770	4.90295	8.64876	10.241	10.7099	12.8794	12.2409	11.1708	10.567	10.7961	6.19773	6.6311	6.15421	8.03068	8.51466	8.52354	8.2225	7.42236	8.19674	4.18185	4.17918	4.21204	4.9367	4.80526	5.16315	5.81142	3.63303	5.96328
Peak_1639	Chr1	9748703	9749308	AT1G27980	2.60131	2.49281	2.51722	3.55612	4.51092	2.75863	2.52536	4.0932	3.66733	1.4078	3.18179	2.04253	2.07508	1.41594	2.49009	2.82916	2.86985	2.27581	3.68632	3.03531	2.1673	3.73514	3.26045	3.48017	3.70259	4.87983	4.38072
Peak_1662	Chr1	9956079	9956918	AT1G28370	1.93732	3.01948	4.46171	3.97053	5.36579	5.49103	4.34626	5.29143	4.89027	1.69662	0.898213	1.73772	2.07626	2.89424	2.71421	2.50482	2.54787	2.33849	2.09583	1.99994	1.59878	1.29742	1.59682	0.69861	3.69265	1.85905	2.74552
Peak_1663	Chr1	9963487	9964805	AT1G28380	5.0211	6.35582	7.81766	6.54649	8.04696	7.7005	7.72294	8.72118	7.03875	5.54202	4.84288	5.11581	5.07593	4.52883	4.73446	5.4174	5.21925	4.94881	4.83042	4.38551	4.70206	5.56446	4.92015	5.47847	3.87705	5.37378	5.08465
Peak_1667	Chr1	10015828	10016546	AT1G28490	3.82255	3.23728	4.52213	4.1632	5.07997	5.36117	5.96245	4.65245	5.29944	4.17005	6.60259	6.15677	5.16227	5.73611	4.96794	3.56192	2.78232	3.8637	3.83855	3.82026	2.89435	4.95194	6.08591	5.3566	4.85135	4.6936	4.01688
Peak_1692	Chr1	10236896	10237403	AT1G29280	1.98031	1.15518	1.13577	1.90912	1.19401	1.63732	1.32021	0.82513	1.21343	0.902789	1.48847	1.51436	0.685991	0.349467	0.744235	1.49818	1.32021	1.74086	0.990156	2.14534	1.63408	1.15518	2.46892	1.54348	3.17756	2.40744	3.19374
Peak_1696	Chr1	10260310	10261154	AT1G29330	4.65708	6.42342	7.72484	6.58488	6.89807	9.04181	7.99523	8.41153	7.29297	3.76418	4.86328	6.54403	6.27947	6.14913	5.28346	5.97016	5.59277	5.18037	4.44114	4.52479	3.89451	4.96055	5.37879	5.75423	5.11228	5.54414	3.77001
Peak_1702	Chr1	10299462	10300844	AT1G29410	3.10216	3.86047	3.84977	4.92899	4.44286	4.73882	5.02408	3.87948	5.15244	4.10769	4.19802	3.85096	2.90961	3.57521	4.19207	3.0463	3.41119	3.47062	2.84899	2.78481	3.09027	3.65247	3.29709	3.42783	3.05105	2.73727	2.32127
Peak_1717	Chr1	10381021	10382093	AT1G29690	7.91715	8.18677	10.1354	8.49316	12.2434	10.0665	9.19786	10.4081	9.83822	7.97842	8.23732	7.84055	9.33114	8.89913	10.5276	8.15307	7.97383	8.10252	7.42998	5.46908	6.8938	9.92248	7.98915	7.21705	7.26606	5.39095	7.1098
Peak_1719	Chr1	10398674	10399703	AT1G29720	2.8503	3.05936	3.00031	2.43536	4.63931	3.73443	2.23747	2.36035	1.66773	1.10916	1.872	1.23843	0.69103	1.38365	1.08043	0.842641	1.38366	0.732523	1.54644	0.813914	0.8586	1.47303	2.12735	2.34599	1.54644	3.2413	1.872
Peak_1732	Chr1	10474193	10476072	AT1G29920	2.79881	4.76087	6.19131	8.94728	4.12346	5.08525	6.26214	5.30647	6.43088	9.22707	0.0891842	3.58136	1.02999	0.936434	1.33776	0.902335	0.847251	1.03611	0.970534	5.11848	6.89604	0.579698	0.579698	0.490514	2.34939	2.09583	2.12643
Peak_1775	Chr1	10821308	10822120	AT1G30550	6.54887	5.36203	4.43398	6.78139	7.00581	8.8255	6.59942	5.76438	7.42434	5.6552	6.25772	6.79958	6.0616	5.90995	5.67137	3.95884	5.38225	3.81731	4.16709	5.25284	6.38712	5.76034	6.04138	5.79067	4.2136	6.29007	4.68672
Peak_1780	Chr1	10846476	10847390	AT1G30610	5.07868	5.09664	5.77212	6.04699	8.92855	7.265	9.28426	7.87582	8.26205	8.19558	7.69257	6.98655	4.89364	7.4177	5.94458	5.00862	4.67986	4.99963	7.01888	6.65599	6.28951	6.23742	5.47391	5.74158	4.58105	5.31222	4.57745
Peak_1802	Chr1	11114949	11116094	AT1G31130	9.39083	11.5366	13.506	13.3784	14.2777	15.0609	14.1486	14.1128	14.8472	11.8192	13.1489	10.5053	12.6884	13.8202	13.0571	11.736	9.97461	13.0083	8.1587	10.5125	9.4568	11.2598	10.7994	10.6746	9.62749	9.58303	10.5799
Peak_1825	Chr1	11276034	11276629	AT1G31500	2.65875	3.94951	3.64336	4.7383	4.09016	3.47512	5.3368	5.83876	6.01803	3.84746	4.54524	5.06375	5.26785	3.09176	4.04052	4.44871	4.34942	3.5882	3.19932	2.81319	3.70955	2.9704	3.86952	4.30805	3.93847	3.70956	3.88883
Peak_1846	Chr1	11435895	11437314	AT1G31860	3.36398	4.62345	5.16867	4.58988	5.37241	5.11311	4.8978	5.49859	5.65949	3.94625	5.25433	4.35372	4.21481	5.07722	4.36414	3.73325	5.07722	3.73325	3.94393	3.79576	3.39176	5.05291	4.30974	4.13262	3.57813	3.23317	3.0711
Peak_1849	Chr1	11462710	11463909	AT1G31920	6.36694	7.33267	6.58064	6.89843	8.90659	8.33811	6.60666	8.71619	7.83539	7.23404	6.32173	7.71073	6.69433	7.82443	7.68471	5.73682	7.1861	5.89846	4.47795	6.56556	6.64775	6.49708	7.34363	5.9601	5.61217	5.30944	5.7286
Peak_1855	Chr1	11528379	11529204	AT1G32050	6.77018	7.62989	8.43586	9.65378	8.81596	11.5324	9.0289	8.16322	8.7264	8.32242	10.4518	9.21397	6.90153	7.24381	8.34829	6.22491	6.34232	7.20401	4.48758	5.65574	6.7861	8.97119	8.61696	8.15526	5.94828	7.10252	5.23982
Peak_1866	Chr1	11604283	11605164	AT1G32200	7.56292	10.6362	11.8066	9.41358	10.8151	12.8875	11.186	11.8569	12.7906	8.0978	9.3148	9.20484	9.60554	10.1106	11.1338	7.33555	10.3864	9.00729	8.15744	6.64224	8.25808	9.56081	9.06134	9.49745	7.22372	7.16781	7.08208
Peak_1869	Chr1	11629326	11630573	AT1G32240	5.32651	5.23958	5.1724	5.18953	4.9037	4.93795	4.28729	4.55467	4.42295	3.59974	5.72955	4.30441	5.03674	4.50198	4.76936	5.98244	5.2949	5.5794	4.39792	4.05283	4.80887	6.7016	6.38549	6.20767	5.42134	5.23958	5.78487
Peak_1882	Chr1	11738122	11739015	AT1G32460	4.66476	4.57466	4.20508	3.92376	5.45355	3.67186	3.80057	4.2345	5.11523	3.1368	4.67762	3.37583	3.8447	2.71942	3.30229	2.7231	3.00074	2.29469	4.2676	3.88147	3.51373	4.12602	4.10947	3.30229	3.56338	4.1205	4.03224
Peak_1886	Chr1	11758431	11759353	AT1G32520	5.16467	4.82629	4.82807	6.43446	5.31604	6.3935	5.30892	5.86635	5.04	3.93049	3.90555	4.94383	2.91537	3.63307	2.83522	2.97236	4.35791	3.73459	3.02756	2.86372	3.33922	5.27687	5.41934	4.69272	5.34632	4.81383	5.28042
Peak_1892	Chr1	11796668	11798036	AT1G32610	3.42926	4.24455	3.97919	4.62278	4.995	4.95658	5.32761	5.29399	5.36002	4.71643	4.4859	4.8341	4.57355	4.40905	4.09926	3.59496	4.08846	4.30459	4.87013	4.45228	4.26016	4.38144	4.11608	4.62999	3.95157	4.67081	4.28658
Peak_1903	Chr1	11911632	11912383	AT1G32870	3.72694	2.99685	3.45589	3.45808	5.3598	4.36522	3.52584	2.82417	3.96739	3.11489	1.94981	2.89849	1.69406	2.87663	2.38918	2.71925	2.56842	2.67553	2.77389	3.44277	3.67885	3.87558	3.3313	4.36741	3.34441	4.18598	3.15424
Peak_1904	Chr1	11921617	11923808	AT1G32900	6.08097	8.11996	9.49678	10.5699	8.40117	9.10232	4.16871	4.28345	3.63328	1.84326	0.420696	0.911132	0.486688	0.207723	0.344206	1.34758	1.03262	1.02962	0.85264	1.49156	1.46981	1.49156	1.91225	2.02699	4.47992	4.89537	4.84212
Peak_1905	Chr1	11928864	11929502	AT1G32920	2.36664	2.7165	3.20011	4.71785	3.36732	3.86123	4.14677	3.2104	3.59112	2.37436	1.64122	2.2303	1.73897	2.84254	1.85473	1.44314	1.49459	1.80843	3.36475	2.1377	3.67344	1.77756	1.84958	2.48755	3.22841	4.00529	1.96791
Peak_1906	Chr1	11931181	11932288	AT1G32928	4.49223	5.18506	6.59296	8.02608	7.49051	6.57663	7.55728	8.5839	8.73819	4.73405	4.01007	4.64207	4.91801	4.7474	3.97001	5.22066	5.50699	4.58718	2.798	3.78309	4.16139	3.18076	3.76974	3.63176	4.12876	3.10213	2.99383
Peak_1912	Chr1	12004881	12005990	AT1G33110	4.8825	5.43783	6.36931	8.22783	6.97499	6.90687	6.41966	6.55887	5.65848	5.35934	5.47929	3.98063	3.09654	3.02546	2.86996	3.6578	4.59076	3.85476	4.83807	4.52856	4.7655	6.35598	7.28895	6.24936	6.5633	5.26901	5.5326
Peak_1917	Chr1	12052227	12054637	AT1G33240	7.26035	8.77869	9.62547	9.26685	11.1915	10.1682	10.3427	10.2343	11.0995	10.6038	11.3483	10.4995	8.16917	10.1334	8.87277	8.38735	8.78074	8.48825	9.3882	9.1973	9.3548	10.057	10.3284	11.0204	10.5268	9.3323	10.1791
Peak_1936	Chr1	12177712	12179328	AT1G33590	9.64417	8.05731	7.81435	9.73973	10.0355	10.2734	10.6618	10.9393	10.5062	10.0965	8.20166	9.72447	7.40366	7.9404	8.13965	6.97365	6.93502	7.83265	8.52493	8.76687	7.73709	8.55441	8.42023	9.11861	8.81363	7.10275	9.16536
Peak_1941	Chr1	12237875	12238537	AT1G33760	3.99418	4.25451	5.5512	2.65535	3.1884	3.92972	3.41402	3.28262	3.85782	1.64379	1.05619	1.32891	1.77023	1.89668	1.01156	1.8099	1.43305	1.51734	0.897513	0.937182	1.67602	1.64379	1.4628	1.51734	2.4099	1.28181	2.02312
Peak_1947	Chr1	12357993	12359023	AT1G33990	6.77605	8.18068	8.29388	9.46893	10.5068	9.70329	8.04835	8.04994	9.5295	7.48075	8.85509	8.30822	7.46959	7.59714	8.96988	7.64179	8.21576	7.17145	6.15583	7.03911	6.65009	6.91157	9.9281	7.23682	8.2301	8.7116	7.82354
Peak_1985	Chr1	12852000	12853114	AT1G35140	5.33089	6.36286	7.93736	6.50439	6.51913	6.06211	4.58639	5.29551	5.58151	3.52935	5.66849	4.54953	4.06008	4.6085	4.68222	3.9849	5.20115	5.12155	7.21792	2.48116	1.63494	4.06008	2.84235	4.45076	5.33826	3.9849	4.85323
Peak_1991	Chr1	12983191	12984659	AT1G35350	3.743	3.59754	3.66915	4.13577	5.97538	5.44945	6.03804	6.28198	6.13427	3.34576	3.78105	3.51473	3.10518	3.70719	3.48116	3.29653	2.77173	3.16897	3.88064	3.57292	2.97874	2.65088	3.90078	2.34875	3.36702	2.4696	3.05818
Peak_2004	Chr1	13205281	13206238	AT1G35670	8.56898	8.23782	7.0024	9.04942	10.3483	10.3106	8.81435	9.05457	8.00789	8.01475	6.13589	7.54632	8.0954	7.9873	6.69354	5.12183	3.8092	4.82155	7.41764	7.93411	7.67673	7.13281	8.89671	6.70384	7.61324	8.99966	8.58098
Peak_2028	Chr1	15891271	15892176	AT1G42430	5.94921	5.12187	6.26309	7.21743	6.43363	7.34806	7.16119	8.3278	9.03902	7.94135	5.33777	7.54038	7.11583	7.60206	6.07984	5.55731	7.09768	6.04718	5.98912	5.72241	6.90899	5.08921	6.67132	5.89115	4.3163	5.75326	6.29211
Peak_2030	Chr1	15926149	15927476	AT1G42470	2.57337	4.40407	5.7446	7.3104	6.64694	6.36101	7.01581	9.65602	9.48396	3.72452	4.27781	3.41507	5.14427	3.78764	4.79768	3.09324	4.05625	2.96699	2.71572	3.5537	3.86315	3.40888	3.40888	3.34575	2.90386	2.14757	2.71448
Peak_2033	Chr1	15976921	15978823	AT1G42550	9.82386	10.3041	11.193	12.1008	9.87655	10.9338	10.4181	9.92665	11.1653	9.16306	9.04904	8.81927	7.62811	8.47376	8.58691	10.1331	11.3217	10.5296	8.01768	7.89675	9.26153	9.86792	10.1806	10.4363	10.5201	11.9686	11.1748
Peak_2036	Chr1	16136085	16137579	AT1G42990	5.59548	7.73845	8.71703	9.18763	9.42841	11.5835	9.28109	7.96276	8.7632	6.61693	6.36184	6.87312	7.78573	7.82641	8.64555	6.9358	5.99131	6.25519	5.20624	5.94073	6.16833	5.51082	5.98581	5.91104	5.65265	6.14964	5.20514
Peak_2038	Chr1	16230553	16231344	AT1G43130	6.60836	5.04552	5.90477	6.12062	7.14176	6.84704	8.64027	8.4514	9.57008	7.2061	8.47007	5.95458	6.55025	7.39704	6.49836	5.56232	7.93668	5.87987	6.42987	6.40289	5.55401	5.83628	7.80177	5.09741	6.17251	7.40328	6.18081
Peak_2039	Chr1	16266598	16267499	AT1G43170	5.33411	6.71366	6.25624	8.15881	6.87767	7.35513	6.93234	7.24944	6.55875	5.91363	7.08724	6.39656	6.47492	7.3041	6.29086	6.01204	4.92772	6.70272	5.27944	6.25623	3.92359	6.02662	5.70588	5.11178	4.46119	5.40336	3.8106
Peak_2056	Chr1	16708652	16709769	AT1G44000	9.13935	10.3612	10.9743	9.90978	11.3874	10.1524	11.6874	11.7168	13.1577	8.99819	8.75413	8.37038	7.34706	9.50986	8.70414	7.9984	8.53065	8.48654	7.30001	8.97908	8.17336	9.26726	10.7317	9.06436	6.79128	6.89862	5.67827
Peak_2062	Chr1	16849419	16851326	AT1G44446	5.84372	8.39039	10.7225	10.4089	8.61179	9.4871	10.5296	11.1611	10.7846	10.1048	4.54368	6.50968	6.63288	6.76641	5.87387	5.78945	5.87474	5.03733	3.60289	6.68456	8.79099	5.09936	4.83143	5.13124	5.44569	5.01063	5.97295
Peak_2067	Chr1	16897701	16898515	AT1G44760	2.64015	2.96285	2.82167	3.90072	3.47313	3.37834	2.23878	2.20651	1.86968	1.54294	1.44008	1.84951	1.43201	1.61152	2.31946	1.96448	1.56513	1.92011	1.59538	1.23032	2.31744	3.18875	1.44008	1.95439	2.1218	1.96246	1.92616
Peak_2089	Chr1	17132940	17133747	AT1G45207	5.46845	6.70332	6.211	7.88734	7.31363	8.12943	7.56184	8.10502	8.96963	5.95873	7.95243	7.14478	5.91194	7.70424	6.30254	6.79487	6.84776	7.57201	6.58329	6.23744	6.89455	6.52836	4.12168	5.70647	4.66893	4.69131	5.1877
Peak_2107	Chr1	17300771	17301592	AT1G47210	3.77352	5.15734	4.07348	4.73139	4.34944	4.97736	4.91137	4.08348	5.20133	3.8395	4.35344	4.38543	3.79151	3.97549	3.29757	3.66753	2.45169	2.80364	3.93549	3.05561	4.14546	3.9155	4.13747	3.18159	3.47355	4.39544	4.06548
Peak_2124	Chr1	17451586	17452690	AT1G47530	5.09798	4.45385	4.03137	6.01582	5.37764	4.90459	5.61417	4.00608	5.69003	3.06295	4.13253	3.2013	2.57948	2.84427	2.75353	3.40063	4.90459	4.65914	4.57434	3.71749	3.80823	5.88343	5.9221	5.99499	4.66211	4.43154	4.96558
Peak_2143	Chr1	17723319	17724088	AT1G48050	5.20035	6.20584	6.41505	6.6883	6.87829	8.05883	6.64133	8.01827	7.92007	5.99662	6.99784	7.41199	5.83438	5.09788	6.25493	5.29855	5.39462	6.2955	4.04116	4.07745	4.6389	5.43945	6.54527	6.82706	4.46384	7.18571	4.02835
Peak_2145	Chr1	17766842	17767553	AT1G48100	0.588717	1.81694	2.99437	3.9848	2.02472	2.48877	2.11938	1.41292	1.76615	1.48218	0.824203	1.40368	0.962725	0.923476	0.824203	0.824203	0.588717	1.47987	1.88389	1.99933	1.593	1.64841	0.470973	1.05969	2.02934	1.83079	2.03165
Peak_2167	Chr1	17906049	17907753	AT1G48430	5.04995	6.47489	6.86246	7.67037	8.57469	9.07409	7.40814	9.28427	7.40138	6.80461	7.28762	7.94996	6.44115	7.12854	8.11096	6.54913	5.96777	6.27243	5.82894	6.0931	5.44137	7.12951	6.81136	7.40139	5.11936	5.4462	5.47126
Peak_2182	Chr1	17994429	17995438	AT1G48650	7.59561	8.48423	9.03107	9.17592	8.65674	7.88693	8.09851	11.7425	7.47028	7.59235	8.84065	8.21406	8.09851	8.00736	7.60537	7.08457	7.8023	6.22524	7.52399	6.90879	6.95111	9.77159	9.01317	8.85205	7.99271	10.3624	9.04734
Peak_2187	Chr1	18060791	18062190	AT1G48830	2.48799	3.27818	3.7948	3.02809	4.11182	4.31964	6.05267	6.00335	5.6288	3.85116	3.54354	4.17757	3.37446	4.27854	4.09303	3.01518	2.83554	2.90716	3.98149	3.94509	3.27349	3.11381	3.58229	3.23357	2.84023	3.3592	2.76156
Peak_2205	Chr1	18198139	18199446	AT1G49200	7.72505	6.02848	3.84556	4.8899	8.66633	7.74893	2.805	2.6278	2.09998	1.89387	3.2549	3.28506	0.836975	1.85869	0.906094	3.07645	3.51756	3.71738	4.61467	2.99476	2.17412	6.64679	7.4536	6.62542	10.3516	8.02415	9.53724
Peak_2239	Chr1	18428946	18430462	AT1G49780	10.1802	12.9228	14.0605	11.4025	11.1229	12.1534	11.3982	13.3399	12.3777	11.7709	11.0427	12.1588	11.3841	12.7461	11.6257	11.2183	11.6127	11.2183	10.1607	10.7166	10.3633	9.12915	10.0404	9.72295	9.30577	9.54525	10.1347
Peak_2249	Chr1	18507882	18508535	AT1G49980	2.09118	2.69189	2.9734	2.74468	3.93353	4.1522	4.95399	4.95901	5.0696	3.08399	3.45346	3.53892	2.99853	2.46065	2.39028	2.64414	3.08902	2.50841	2.23445	1.87	3.05885	3.16693	4.98415	4.09691	3.19961	2.69189	2.43552
Peak_2297	Chr1	18864911	18867201	AT1G50890	6.90521	9.02039	10.6656	10.0565	10.4296	9.52766	10.4884	10.393	9.47743	10.0206	9.86129	9.77017	10.3915	10.0995	9.37913	8.6229	9.33322	8.6229	8.26916	7.9097	8.52603	8.709	9.82184	9.44084	6.75955	8.30648	7.86736
Peak_2306	Chr1	18934170	18936087	AT1G51100	6.82627	7.69273	7.92155	9.56706	9.67932	9.6579	9.86702	11.1843	9.98271	7.64644	8.65603	7.48789	9.7976	7.95154	8.78544	7.05938	7.47247	7.46047	5.83896	6.98995	7.66701	7.33706	8.10582	8.1521	5.56642	5.7644	7.45961
Peak_2333	Chr1	19152506	19153309	AT1G51650	5.42205	7.30096	8.81799	7.1006	8.6994	7.52176	8.06561	8.11467	7.91226	6.21123	10.7357	8.97336	5.82073	7.07606	7.13535	6.18465	6.27257	5.96998	6.78778	4.77394	5.24826	6.64876	7.82026	6.87161	6.15194	5.94545	6.15194
Peak_2342	Chr1	19199379	19200659	AT1G51760	3.44798	6.69578	8.80665	6.69578	10.0231	8.53332	8.38961	9.41874	9.0928	4.90313	5.34199	5.92713	4.16401	5.5704	5.55244	5.45235	5.59094	6.40706	5.36124	3.79316	2.84487	5.53447	4.15246	4.83769	4.99681	4.77995	4.97371
Peak_2373	Chr1	19579911	19580717	AT1G52565	5.0821	3.67867	3.84366	7.63639	4.77859	6.02518	4.05142	3.73977	4.25307	3.11647	1.86581	1.59286	1.24659	1.85563	1.11419	2.3893	3.17351	2.18153	3.40775	4.05142	3.42812	3.46479	4.64824	4.06975	6.52627	6.63015	6.05981
Peak_2393	Chr1	19737335	19738330	AT1G52980	3.96754	7.08678	9.65478	9.83138	8.77347	9.25868	8.62824	8.31632	8.922	7.06862	7.49112	8.73716	6.9894	8.11496	6.87222	6.06023	6.36721	6.48108	5.33901	6.44642	6.27478	6.06023	7.44986	6.52894	4.41644	5.89189	5.35716
Peak_2410	Chr1	19844578	19846681	AT1G53210	6.81344	8.22051	9.226	9.31897	11.5643	11.5471	10.8214	10.7893	11.3276	7.29782	9.1088	7.73924	8.92521	10.1526	9.12755	9.55023	9.27834	9.28616	5.23215	6.12436	6.20405	8.27051	7.53065	7.93066	6.6939	6.37515	7.05485
Peak_2425	Chr1	19935033	19935949	AT1G53430	4.62842	3.74648	2.64404	5.1877	5.52829	5.06939	4.67144	5.43866	4.48322	4.31472	3.56542	4.59436	3.26786	3.62816	3.40947	4.72522	2.58668	3.85762	4.28425	3.74827	3.38258	3.31447	3.07964	2.1726	1.92343	3.10832	1.95211
Peak_2426	Chr1	19936008	19936816		1.8165	1.3959	0.829006	2.39965	3.10471	2.30821	2.932	2.70849	3.00514	1.27805	1.03626	1.13988	1.65801	1.36948	1.55439	1.00375	1.24351	1.3004	0.514065	1.03626	1.47921	0.979365	0.829006	0.829006	1.4467	1.13785	1.37964
Peak_2442	Chr1	20036543	20037404	AT1G53670	5.01909	4.76546	5.83526	7.21208	7.50574	7.30551	9.26777	5.64075	7.13579	5.73419	5.5454	6.92031	4.57095	5.0515	6.22427	3.08735	4.12091	3.72046	4.09231	4.41839	4.64151	5.17927	8.04923	5.97447	5.19834	4.8303	5.28606
Peak_2458	Chr1	20179534	20180365	AT1G54050	3.02283	4.14108	4.38014	7.23109	5.68016	5.20006	5.84414	5.86785	6.12864	5.88563	3.43378	4.6192	4.27741	4.10749	3.99488	6.20175	4.93532	6.04369	2.70277	4.09564	3.73804	3.22436	2.75611	3.84473	3.52664	3.42588	2.94183
Peak_2485	Chr1	20306413	20307079	AT1G54390	2.99924	3.49706	4.56663	4.43848	4.85989	5.7816	5.76189	6.0453	6.20548	4.83771	4.17231	6.39771	4.87715	3.95298	4.48283	4.60359	4.3744	4.96094	3.77061	3.55127	2.90559	3.01649	4.0762	3.08549	3.23829	3.23582	3.77061
Peak_2536	Chr1	20705364	20706961	AT1G55450	4.43864	4.19897	4.21748	4.43453	7.42173	4.84701	5.95693	6.47641	6.18118	3.79162	3.31432	3.2526	2.83291	3.77824	3.72475	2.9903	3.29992	2.86583	2.78045	2.69816	3.44805	2.78765	3.30507	3.09522	3.5612	2.86274	3.28655
Peak_2569	Chr1	20906077	20907248	AT1G55910	7.0408	8.56257	8.10394	8.37884	8.13479	7.01555	9.40971	7.29046	7.76872	5.75185	6.70699	6.81919	4.73501	6.94262	5.80094	6.03237	7.32692	6.51064	7.73646	6.85005	5.24273	8.82625	8.28767	8.45037	7.01275	7.42089	7.11934
Peak_2573	Chr1	20927797	20930068	AT1G55960	4.45892	7.45493	10.3402	10.1123	6.29226	7.93605	6.67355	6.15553	6.54115	4.31928	2.24719	2.50547	2.05329	2.76738	2.64366	2.73989	2.89182	2.99456	2.2877	3.43445	4.6615	2.54599	2.10321	2.3615	4.00094	5.19327	4.02193
Peak_2604	Chr1	21137089	21137927	AT1G56430	1.88281	2.24135	1.69865	4.7041	3.46391	2.84087	1.08933	1.39889	1.08933	1.55562	0.799363	1.49881	0.499602	0.799363	0.961978	1.04231	1.19905	1.04818	1.19317	0.613237	1.30876	1.69865	2.89769	2.72136	1.36362	2.15515	1.88281
Peak_2609	Chr1	21167580	21168941	AT1G56510	4.49447	6.37119	7.46343	7.58533	9.37876	9.06497	8.48205	9.67325	8.06687	4.80223	6.59808	5.58429	5.40085	6.11774	6.49067	5.14137	5.92585	5.57102	5.26326	4.08292	3.50361	5.25361	5.53602	5.99705	4.05878	5.05326	4.88067
Peak_2618	Chr1	21237921	21239948	AT1G56660	3.059	3.7042	4.17432	5.12995	5.88862	5.4566	5.26693	5.45984	5.86187	2.57673	2.26629	3.11898	2.413	2.70479	2.7283	3.47887	3.70582	3.93602	3.33135	1.77753	1.57084	2.31897	2.07176	3.01767	4.68334	3.83145	3.39133
Peak_2631	Chr1	21395166	21395850	AT1G57770	4.03868	3.00681	3.00681	4.54982	5.32251	4.00748	4.06268	4.41063	5.16653	2.19812	2.51728	2.46448	2.92043	2.09733	2.74765	2.93722	2.23171	3.03561	3.44596	4.24985	3.78191	4.59781	4.30985	4.61221	3.68592	4.18026	4.36504
Peak_2634	Chr1	21425020	21425575	AT1G57850	3.55957	2.69924	2.67559	4.16269	3.29349	2.12273	3.91139	3.56844	3.08062	1.6704	3.60096	1.96013	1.39545	2.36516	2.53664	3.34966	3.05993	2.71403	2.35038	2.48046	2.6342	3.4827	2.92393	3.59209	4.52337	4.82493	3.74287
Peak_2638	Chr1	21441384	21442996	AT1G57990	4.21495	7.58813	8.62658	6.48446	8.63473	5.76905	8.05589	8.52365	8.10786	3.79406	4.67761	4.83353	5.08933	5.96574	5.01697	4.38819	4.67354	3.58413	5.40524	4.15788	3.11025	3.68095	3.0165	4.12731	5.34104	3.54439	4.3087
Peak_2643	Chr1	21512720	21514091	AT1G58100	9.62072	9.70938	11.7258	8.40345	12.4075	11.3687	9.28765	8.55441	8.4322	7.54441	9.8136	9.47095	7.21015	10.082	8.23691	8.90186	8.24171	8.56759	9.61472	7.4234	6.75966	9.86753	9.99932	10.9626	9.66145	11.7821	9.64467
Peak_2648	Chr1	21553488	21554271	AT1G58210	5.02572	4.598	4.81186	5.38634	6.7303	6.43467	6.84353	5.98809	6.32984	5.39263	6.46822	7.50398	7.16851	5.22699	5.74697	4.78041	5.13265	4.56445	5.08861	3.99625	3.86416	6.21034	4.99007	4.96282	5.14732	4.15979	5.42827
Peak_2655	Chr1	21624089	21626341	AT1G58290	6.2286	9.70879	10.987	10.3041	9.5096	9.62561	11.5372	11.5321	11.3285	8.68005	5.20934	6.41975	7.64767	7.73521	6.80352	7.7396	7.47913	7.06982	4.80004	7.21866	7.8038	4.2791	4.68841	4.16529	5.50702	5.55007	3.75817
Peak_2659	Chr1	21707473	21707928	AT1G58420	2.96315	2.75407	1.26889	1.67984	2.46208	2.60987	2.44405	2.43324	3.06768	1.39866	1.10307	1.16435	1.49599	1.204	1.39506	2.2494	2.24579	1.60414	1.4996	1.47076	1.64018	2.20614	0.760613	1.28691	3.43537	3.68411	2.58104
Peak_2676	Chr1	21936347	21937413	AT1G59700	2.99333	4.56471	5.94814	6.02671	5.89114	7.71363	5.36119	6.39953	5.89268	3.61418	5.05307	4.44146	3.77132	3.45704	4.08559	4.24273	4.45071	5.09621	4.50463	3.98853	3.79288	6.46423	6.95106	5.734	4.00702	4.63558	4.8266
Peak_2685	Chr1	22034432	22038416	AT1G59870	3.56271	4.56425	4.91445	5.85948	8.18388	7.62536	7.34858	6.99549	7.55936	4.83938	3.81433	4.0841	4.54403	4.26766	4.26684	4.47639	4.25529	4.20744	6.03107	4.20537	3.65016	3.94097	3.53425	3.7867	3.65799	3.1861	4.16289
Peak_2688	Chr1	22055299	22057298	AT1G59910	6.20202	8.73181	9.92849	8.67016	9.45671	9.59972	10.8342	11.6528	10.3534	7.18253	6.81679	7.16691	9.19289	10.5433	9.25535	8.63482	7.96827	7.29349	5.9201	6.22749	5.65792	6.46091	7.67074	6.32941	6.38283	5.83874	6.80282
Peak_2705	Chr1	22220476	22221501	AT1G60260	4.19278	4.77436	5.7853	6.65526	6.64564	6.28517	6.52549	5.99679	6.03523	4.5821	5.41361	4.41227	5.39278	5.95993	6.55112	6.00319	6.41975	5.76448	4.30813	3.59038	2.85981	3.88838	4.59171	3.84031	3.43497	3.80186	3.3789
Peak_2716	Chr1	22307203	22308353	AT1G60550	8.3032	8.21038	9.79133	10.6596	8.74021	11.1109	9.60281	10.0912	9.73562	8.79591	10.9024	8.72593	8.42603	9.69563	9.09867	6.40235	7.13784	8.15039	6.20384	7.36777	7.7705	8.62454	9.63566	10.5882	5.83823	8.20609	6.11815
Peak_2718	Chr1	22315263	22317025	AT1G60590	3.16357	4.41669	5.97936	5.50571	4.99663	4.87729	2.5482	2.56778	2.6144	1.23634	2.71043	1.94961	1.37899	0.99858	1.61675	2.66288	2.76265	2.66568	2.39622	2.36265	2.47267	3.26893	3.51508	3.54771	3.6857	3.18595	2.77943
Peak_2727	Chr1	22355830	22356822	AT1G60710	6.22256	6.25898	8.20736	8.27192	8.79998	8.93241	8.62948	7.69419	8.53843	6.22421	8.21728	6.97575	5.01082	6.5917	5.36342	5.10518	5.74085	5.36839	4.79562	7.14626	5.64152	7.28697	8.25867	8.21563	5.67628	6.158	6.54039
Peak_2731	Chr1	22381341	22382351	AT1G60790	5.78659	6.67434	6.05324	5.97682	8.25471	8.40267	7.41087	6.86294	7.4824	8.26772	6.60442	6.88245	5.30695	6.60279	5.9817	6.61255	6.14754	5.6744	4.6891	5.27118	5.7996	5.75895	5.61587	5.62563	4.49237	5.82399	5.6744
Peak_2754	Chr1	22572733	22573555	AT1G61215	2.57254	2.31489	3.46534	2.56855	3.91074	3.55921	2.56255	2.91208	3.46134	1.00265	1.68573	1.484	1.73167	2.61448	2.4527	2.24099	1.51596	1.61583	2.31488	2.7503	2.88811	2.34285	2.14711	2.44471	2.70836	4.37811	3.10183
Peak_2755	Chr1	22581378	22582362	AT1G61240	2.21286	2.29797	2.12775	2.88205	2.29797	2.35304	3.89837	3.7949	3.52121	2.16446	1.83403	2.86036	2.16613	2.23121	1.98423	1.28666	2.33301	1.19154	1.91581	1.809	2.67011	3.46781	1.78731	2.38308	1.91247	2.65176	2.23956
Peak_2761	Chr1	22628309	22629345	AT1G61340	2.40149	3.01652	3.55547	4.38925	5.75722	4.78236	5.8666	7.01424	5.96804	2.02105	0.970104	1.45516	3.27965	1.85461	2.34442	1.39651	1.83401	1.63745	1.51698	1.96399	1.13179	0.727579	0.531022	1.05095	1.30457	0.786229	1.3331
Peak_2766	Chr1	22678073	22679050	AT1G61470	3.49935	5.01204	5.20029	5.16163	5.12129	5.73981	6.62726	4.0372	6.34321	4.48764	3.53465	4.54311	3.77332	3.34304	3.87752	3.6523	3.56154	3.51448	3.51448	3.05563	2.72116	2.54804	2.54468	2.08415	2.96151	3.0237	3.25732
Peak_2784	Chr1	22868411	22871269	AT1G61890	2.93226	5.454	6.74419	7.93664	7.41286	7.28464	7.87455	6.59758	7.40711	2.16872	1.75935	1.62999	2.69768	2.3803	2.56659	2.81497	2.94376	2.95008	2.46309	1.5472	1.58399	1.60642	1.43681	1.99393	2.55106	1.26375	2.40445
Peak_2801	Chr1	22975432	22977740	AT1G62170	12.0533	11.9443	10.9178	12.8527	12.4562	11.4012	10.2009	8.20542	9.8015	7.07989	8.17124	7.83166	4.03009	4.64731	5.11931	7.29774	5.98285	6.88412	9.1615	7.98757	5.681	10.3112	9.69401	10.5191	11.7998	10.8637	10.5803
Peak_2834	Chr1	23291800	23292570	AT1G62880	6.45789	6.74572	7.24248	8.32341	9.62181	7.56014	7.27872	9.79451	7.53669	6.26601	7.93538	6.59434	7.50045	7.50684	5.96326	4.94629	7.24674	5.55179	5.10406	5.89077	5.11045	9.11439	9.41075	6.73079	5.98032	5.90357	5.31299
Peak_2839	Chr1	23319015	23320428	AT1G62960	7.06806	8.20964	10.0941	9.66743	8.56537	9.26985	9.08385	11.1334	11.0775	7.37031	7.58886	7.29242	7.25406	7.81904	6.44495	5.96716	6.93321	5.88927	6.74604	7.7737	6.14386	7.66094	9.39075	9.05711	7.05527	7.21221	7.58886
Peak_2846	Chr1	23391250	23392924	AT1G63090	7.86173	8.9216	10.4211	8.00206	10.2818	8.73317	10.6439	10.2474	9.69295	9.00011	10.5369	9.95498	7.99912	8.54475	8.64093	7.92061	7.16103	8.40246	7.53689	6.9147	7.79891	8.84604	9.52612	9.15909	9.22582	9.15124	9.10904
Peak_2883	Chr1	23663902	23664751	AT1G63770	2.1698	2.39993	3.28758	4.40729	4.45176	4.54072	4.82887	5.8983	4.51752	4.30866	5.12862	4.43823	3.64921	4.66642	3.47129	2.57591	3.64728	2.48889	2.57011	3.00716	3.35913	3.20636	4.04372	3.39781	2.2839	2.76157	2.37672
Peak_2887	Chr1	23685165	23686117	AT1G63830	3.52733	4.44841	5.46262	5.81622	6.08702	6.0439	7.8688	8.87957	7.12538	5.03313	4.91067	5.86796	7.42896	6.00595	6.8908	5.66443	5.1625	5.1694	4.38286	4.86582	3.6153	3.45834	3.3238	4.03789	3.57908	3.36175	3.20996
Peak_2892	Chr1	23704982	23706096	AT1G63860	5.78938	7.42727	8.02582	9.71826	10.1163	8.71281	10.9021	9.41161	9.37917	6.43805	8.13638	6.69457	7.14274	9.74036	8.15555	9.45437	7.83564	9.38065	7.24151	6.39677	4.08367	5.71419	5.81592	6.43805	7.03364	4.43602	6.14467
Peak_2910	Chr1	23829026	23830134	AT1G64200	1.64082	3.26979	4.14727	3.40319	4.46002	4.39924	4.98917	3.57958	4.2866	2.85625	2.11662	2.73915	2.46494	2.08846	1.55782	2.82661	2.41455	2.82661	2.35822	2.64429	1.64082	2.18777	0.907122	1.51187	1.88984	1.37551	1.2095
Peak_2919	Chr1	23899963	23900757	AT1G64385	4.73494	5.7729	7.3009	6.10786	7.3071	5.9776	8.62214	7.34432	7.30917	6.08718	6.20297	6.55447	6.12854	4.63982	5.23944	4.28419	5.38418	4.66671	5.85974	6.38286	4.90655	5.02855	6.13681	5.59715	4.9293	5.09471	5.34489
Peak_2926	Chr1	23952082	23952663	AT1G64490	4.05581	3.5107	3.99367	4.27894	5.49059	4.60374	3.78749	3.01926	3.2791	3.90329	2.90064	2.52499	3.11529	2.30187	1.87256	3.41467	2.28492	2.66057	2.17195	3.03338	2.44874	2.34424	2.74812	3.73948	2.92323	3.05598	3.42032
Peak_2927	Chr1	23953073	23954871	AT1G64500	10.5243	11.65	13.281	13.7442	12.116	12.719	8.85398	9.62151	9.15551	7.86076	5.81402	6.10458	2.2368	2.93579	1.8174	5.87159	5.61483	5.35899	5.45219	5.45219	6.24438	9.33917	9.98609	9.24049	11.6966	9.93675	12.3024
Peak_2929	Chr1	23959539	23960491	AT1G64530	7.78773	7.54108	7.13918	7.85328	8.4035	8.51389	9.67645	8.38281	9.20383	4.68471	7.46173	4.96241	4.83822	4.37941	5.01416	4.98311	4.74336	5.28496	6.24915	6.15946	6.11979	7.86362	8.16375	8.07406	5.68513	8.63809	5.25736
Peak_2935	Chr1	24000943	24001949	AT1G64610	2.81256	2.96274	3.0819	4.0352	4.18701	4.6457	4.52654	5.25784	5.47984	3.33002	3.22228	3.6369	4.11519	3.57814	4.59673	2.87622	2.60688	2.74727	3.75117	2.76196	1.64868	3.34145	3.3594	2.74727	2.48609	3.29411	2.55465
Peak_2943	Chr1	24049896	24050643	AT1G64740	6.03675	5.33352	5.72689	5.11157	5.40164	4.77753	5.49614	5.7159	6.0807	2.50524	3.91389	3.66776	4.03475	3.61941	4.20836	3.59524	4.55338	3.92488	3.46118	3.77983	4.4435	5.84336	6.11366	4.77094	3.61941	4.88961	3.82159
Peak_2947	Chr1	24061205	24062732	AT1G64780	6.03512	8.13396	9.53032	8.23185	6.15667	5.8845	6.03512	7.47989	6.91295	5.32725	5.04109	4.20521	1.97513	1.82344	1.97513	6.21585	6.97965	6.07922	4.38917	4.34506	5.92646	4.65704	5.31112	5.00129	8.83966	5.87052	7.02267
Peak_2974	Chr1	24245139	24246050	AT1G65280	5.95873	5.60727	6.12275	6.55893	6.64364	7.5881	6.9861	7.8134	7.44571	6.15519	6.9897	7.90352	6.11014	6.39311	7.26547	6.46521	5.76948	5.3351	7.55566	4.74211	5.79111	6.24892	7.55025	6.56975	6.9122	6.52289	6.55172
Peak_2976	Chr1	24251508	24252321	AT1G65295	5.9027	4.66279	3.956	6.60747	6.30859	5.40794	5.99559	4.2892	5.5594	2.8837	3.51173	2.67974	2.74032	2.91399	3.67328	3.53798	4.44671	3.39864	2.52222	4.05898	3.90551	4.44671	5.04445	5.24437	4.21852	4.11957	2.9362
Peak_2979	Chr1	24292471	24293665	AT1G65390	2.67408	3.17478	2.79513	3.19542	4.84608	4.52557	3.29721	3.22705	3.1569	0.601117	1.53787	1.40307	1.54337	1.97255	1.61353	0.491073	0.491073	0.63138	0.491073	0.390658	0.491073	1.40307	0.911993	1.12245	2.02207	1.41682	1.44708
Peak_2985	Chr1	24349633	24350210	AT1G65486	2.46568	1.88552	1.74048	2.94631	2.98612	2.98043	2.61357	3.70563	2.32349	1.09775	1.1717	1.03234	1.30536	1.01528	0.58016	2.32064	2.32064	1.57838	2.48843	1.12051	1.01528	1.34518	1.07785	1.92818	3.91608	2.46568	2.95484
Peak_2986	Chr1	24354749	24355972	AT1G65490	3.22983	6.03126	6.89881	6.11855	7.45614	7.69115	5.54779	6.32805	6.40325	2.01445	2.26021	2.38242	1.50681	2.26021	1.84926	2.81888	3.57766	3.15328	3.21506	1.84926	2.12323	1.90567	1.43832	1.78077	3.80596	3.14791	3.7321
Peak_3001	Chr1	24503466	24504296	AT1G65870	4.42498	7.19232	7.31892	7.78179	6.35756	6.15382	6.05294	6.55735	5.75029	3.16691	1.90687	2.36579	1.0919	2.72382	1.51323	3.12735	1.72489	2.90779	2.42117	3.73264	3.22823	2.49634	2.1126	2.59129	6.7057	5.82151	3.99969
Peak_3004	Chr1	24538796	24540857	AT1G65930	8.98504	7.93355	7.04071	6.22041	10.7611	9.26404	5.70144	6.24353	5.75565	5.90472	9.73677	7.2671	5.63926	6.20845	5.84732	5.83298	5.53643	5.81943	6.7306	5.64723	4.72888	9.32782	10.6519	9.23137	6.46434	7.56685	7.58359
Peak_3009	Chr1	24600143	24601139	AT1G66080	4.34112	4.96104	5.0814	5.731	8.5256	7.97657	6.40534	7.42425	7.18683	4.86377	3.86793	3.82506	4.30814	5.44412	4.73352	4.53072	4.92642	4.95115	4.06413	3.52994	3.95202	4.29166	3.54973	4.79947	3.41947	2.83747	2.70722
Peak_3010	Chr1	24602179	24604001	AT1G66090	3.21905	4.36871	4.77898	4.17304	5.54812	4.78258	4.37682	4.32813	4.35067	1.8647	1.1731	2.04865	2.0216	1.81511	2.16136	2.72312	2.82501	3.33086	1.25786	1.40574	1.61944	1.88544	1.33361	2.06939	2.06939	1.30836	1.95217
Peak_3011	Chr1	24614874	24616044	AT1G66130	5.47883	6.54147	7.66025	7.75009	8.21894	9.67743	8.09963	7.42583	8.33264	6.01365	4.93979	4.86819	6.08384	5.48304	4.72501	5.45216	6.27756	5.40583	3.93751	5.3216	6.94714	6.02348	6.73659	5.98137	6.4432	5.3553	5.49567
Peak_3012	Chr1	24620238	24620715	AT1G66140	2.67546	1.69193	1.00072	1.28614	1.04886	1.38587	1.01791	0.980083	1.68162	1.11076	2.01519	1.91546	0.175383	0.863161	0.350766	0.704972	0.790944	1.40307	2.14243	1.36524	2.96432	2.14931	2.91962	2.85084	4.19544	2.87147	2.92649
Peak_3014	Chr1	24637143	24638430	AT1G66160	4.30984	5.19172	5.14705	5.45335	6.78573	6.01233	7.19796	6.76914	6.76914	2.73369	2.92895	3.52751	2.60352	3.17016	2.44271	3.25312	3.38712	3.39478	2.47079	2.75666	1.69228	2.25766	2.21299	2.46058	4.36089	5.00284	4.22688
Peak_3015	Chr1	24647169	24648310	AT1G66180	4.32394	4.82053	6.10735	6.93644	6.19947	5.56614	4.97455	4.75288	4.71545	3.7453	3.5222	4.60318	4.46068	4.11667	4.33258	3.84606	3.86765	3.43152	4.89826	3.66614	3.4675	2.73485	2.49591	2.78811	5.51	3.04288	3.82879
Peak_3017	Chr1	24655234	24657762	AT1G66200	7.19328	7.34148	7.98885	9.61184	10.3801	10.6297	7.66257	7.89071	8.31644	7.22513	7.49162	8.04735	6.39771	7.64566	7.44612	9.20821	8.61868	9.24851	7.45847	7.34732	6.99439	9.73144	9.28166	9.57284	9.09901	9.27516	9.77888
Peak_3018	Chr1	24677170	24678290	AT1G66230	4.93283	5.40207	5.17332	6.00767	3.99436	6.63087	5.11026	6.94321	6.79217	5.67921	4.28323	5.00028	2.61745	3.06616	3.65417	3.73922	3.66443	3.79347	4.18939	4.71141	4.11314	5.02228	5.37567	4.67622	5.40206	5.43726	4.50465
Peak_3020	Chr1	24692895	24693411	AT1G66250	2.62625	2.53722	2.63896	4.5848	2.82019	3.87896	2.82019	2.78204	3.58327	2.98553	1.92994	2.54358	2.51497	1.61835	2.34327	1.45938	2.16204	1.25271	2.41004	1.45938	2.44184	1.87907	2.31784	2.37189	2.77568	2.21927	2.1525
Peak_3022	Chr1	24731470	24732533	AT1G66330	4.21607	6.0159	6.51645	5.79961	7.64114	7.46039	8.70096	8.22358	7.27345	3.9936	4.88502	5.1631	4.72744	4.51424	4.96381	3.70316	3.76341	3.86074	2.67888	4.14191	4.25006	4.96381	3.76496	4.25469	4.25469	4.64865	5.25425
Peak_3029	Chr1	24811523	24813403	AT1G66500	4.05573	5.95295	7.04968	5.77817	6.42746	6.0412	7.11347	6.99725	8.09659	4.3345	5.55095	4.77581	4.93311	5.22237	4.63599	4.82825	5.21451	4.64036	3.62665	3.99805	4.34498	4.33537	4.93486	4.5486	4.57307	3.83289	4.04873
Peak_3033	Chr1	24839042	24839841	AT1G66580	5.11424	4.38892	4.49165	5.94435	4.95397	4.74438	5.38957	6.00394	5.65874	2.74102	5.56011	4.13207	3.97181	3.96769	4.85945	2.79033	4.01495	3.26703	4.61082	3.80948	4.03755	3.87729	4.59439	3.65538	4.0992	3.63483	4.22659
Peak_3039	Chr1	24883899	24884516	AT1G66725	2.13054	2.52952	3.46047	3.98712	2.47632	3.40195	5.20267	3.61208	4.06957	3.6174	1.08522	2.60133	1.25013	0.813914	1.56931	2.32737	1.76348	2.35929	1.89647	2.60399	1.33259	1.79806	2.12522	2.9418	4.06691	1.89913	4.5909
Peak_3043	Chr1	24902121	24903626	AT1G66760	1.94832	2.05201	2.38273	3.32141	4.34087	3.47859	4.76546	3.92501	4.89207	1.873	0.556661	1.6416	1.50299	1.45059	1.55865	0.614511	0.946325	1.05766	0.779326	1.05002	0.779326	0.278331	0.333997	0.389663	1.16899	0.834992	1.46369
Peak_3047	Chr1	24951242	24952190	AT1G66880	3.88689	3.26852	3.86264	3.51795	2.19807	3.51795	4.13112	3.31876	4.89672	3.50756	1.02888	1.37704	1.1484	2.21885	1.88975	3.88689	2.91344	3.45386	2.68826	2.56874	2.89958	3.37765	2.2968	3.53354	5.20331	3.97523	5.00411
Peak_3054	Chr1	24973383	24974800	AT1G66940	7.26374	5.67327	4.56505	5.98743	9.10923	9.43381	3.80691	4.80037	4.74241	4.38305	10.061	6.67253	4.5778	4.13845	4.61373	3.60637	4.29263	3.60637	7.40864	4.28451	4.22539	7.29272	7.87581	6.79309	6.08943	7.40516	7.94652
Peak_3059	Chr1	25036519	25037327	AT1G67060	5.82133	6.20332	7.52811	6.11392	7.41228	7.98934	7.83695	6.97544	7.49762	5.673	5.50435	5.49826	6.54265	5.37025	6.04483	4.19786	4.76678	4.28726	4.5514	4.16128	4.24865	6.2277	6.73364	6.24193	5.34993	4.87041	5.39057
Peak_3067	Chr1	25137158	25137919	AT1G67195	2.51961	2.31036	2.39234	3.52271	3.92611	3.13226	3.96063	3.99083	3.64999	3.09774	2.80868	3.63057	1.78832	2.42038	1.87029	2.87771	2.77416	1.34394	2.0364	3.90238	2.84319	2.57354	2.49804	2.46784	2.5304	3.55291	1.87029
Peak_3068	Chr1	25140813	25141357	AT1G67210	1.83682	2.5818	3.18805	2.37068	3.75206	3.42029	3.10661	3.67967	4.0024	2.80198	3.1247	2.85325	2.61498	3.72491	4.30401	2.94676	2.4129	3.40822	2.27114	2.27114	1.61061	2.37068	2.7688	2.30734	2.25304	2.84119	2.45211
Peak_3087	Chr1	25276140	25277561	AT1G67480	4.91981	4.96142	4.24472	6.3509	5.29896	5.22498	5.01113	4.87472	4.52099	3.70604	5.20648	4.22622	3.41936	4.26206	5.1036	4.66203	3.4864	4.02046	4.24472	3.4471	3.1477	3.53842	5.08742	4.12681	4.0089	4.46089	3.58928
Peak_3091	Chr1	25307617	25308598	AT1G67530	2.84232	4.692	4.35052	5.36324	4.89286	6.55506	6.15165	6.96351	7.88918	4.27351	4.26849	4.57314	4.23334	3.44827	2.93605	3.28925	4.17978	3.91028	4.63173	3.27251	3.5939	5.02176	3.62069	4.54134	3.50686	4.09775	3.14864
Peak_3107	Chr1	25422913	25423671	AT1G67800	2.63353	2.65302	3.07967	2.65085	2.64219	2.41262	2.65952	2.1484	2.44944	2.10509	2.60321	2.42995	2.4711	2.05961	2.04012	2.68117	2.22204	1.29727	3.1533	2.5404	2.52957	3.21178	4.41809	3.5453	3.05584	2.99737	2.61403
Peak_3114	Chr1	25466722	25468778	AT1G67900	2.10728	2.57716	3.60163	4.51902	2.59474	3.73348	5.21665	5.48436	5.56506	3.1773	2.73059	3.04464	2.52522	2.88642	2.79851	3.083	2.64908	3.10458	2.59074	3.39865	3.99799	2.11927	2.06652	2.40455	2.31105	2.78653	2.65228
Peak_3137	Chr1	25574355	25575260	AT1G68238	1.61113	1.72543	2.09919	3.18598	3.89175	4.56124	2.77593	2.40581	2.22075	1.80889	2.03568	1.57303	1.38797	1.38797	1.57303	2.11189	1.76172	2.19898	1.28636	1.29544	1.6075	3.38192	2.6961	3.74842	2.86665	3.12429	3.01905
Peak_3142	Chr1	25647545	25649091	AT1G68400	8.70772	9.73523	10.7287	9.40264	12.1271	12.3481	9.53759	9.12531	7.96392	7.43689	9.04986	8.63121	5.91424	7.53252	7.46664	9.20607	9.26451	8.70879	8.11906	7.53252	7.60265	9.64597	12.6807	10.5672	9.75435	8.6886	8.02024
Peak_3143	Chr1	25651728	25652880	AT1G68410	6.57658	6.43972	7.67577	7.86538	10.4701	8.16762	7.75133	8.96171	8.19898	5.34908	8.41711	5.57434	5.23218	6.46823	6.1503	4.36538	5.21365	4.58351	6.10326	5.15234	4.15723	5.8167	7.4719	5.86945	5.43462	7.13259	4.86151
Peak_3144	Chr1	25657972	25659220	AT1G68440	8.69142	10.5905	10.4155	10.6168	11.3841	11.5368	6.6278	8.38609	6.3093	4.9669	7.21214	6.45276	4.16146	3.36391	4.84055	6.91207	8.2558	7.2174	7.42929	5.74602	3.81006	8.15051	8.86383	8.48611	12.4001	11.2091	11.4104
Peak_3145	Chr1	25669059	25670063	AT1G68460	5.56762	4.4734	5.57907	4.21006	5.86203	4.92155	3.43642	3.76518	2.45341	3.4266	4.03178	2.43706	3.58689	2.25223	2.83615	3.59507	4.65168	3.58689	4.75635	4.94772	4.1937	5.50874	4.92155	5.40242	5.03931	5.66739	4.28857
Peak_3152	Chr1	25746692	25748317	AT1G68568	3.20266	4.46027	4.0569	4.5836	5.26295	4.95158	2.32011	2.23013	2.22811	2.37065	3.17233	2.81547	0.7208	1.52551	1.26469	2.88725	2.74066	3.31791	3.96895	2.42727	2.26552	3.34217	3.80821	3.61714	3.35531	3.69195	3.4008
Peak_3158	Chr1	25782074	25783865	AT1G68670	6.70541	8.22628	9.48573	9.11973	9.51599	9.16925	9.33621	8.65466	9.59029	6.35775	7.07141	6.54488	8.83995	7.36311	8.39781	7.33101	7.73461	8.23087	5.43679	6.08715	6.45865	6.90997	8.14006	7.29798	6.24034	6.47792	5.9413
Peak_3164	Chr1	25828983	25829637	AT1G68760	3.11943	3.32271	4.9916	4.85859	4.04798	3.73177	4.9389	4.12328	5.50355	4.37172	4.49971	4.79584	3.88737	3.28507	3.38043	4.01285	2.51211	3.75687	2.39667	2.47447	3.86478	2.83585	3.98274	4.3115	4.99159	4.03042	3.96768
Peak_3168	Chr1	25874569	25875670	AT1G68830	6.61841	7.93404	9.38093	9.76727	8.7425	9.59721	9.52413	9.9403	10.4296	8.17866	9.06022	8.54859	8.24579	8.61422	8.45163	7.20612	7.7804	6.39019	7.41793	6.82426	9.15718	8.79621	7.13452	7.75057	6.84663	7.06889	6.39019
Peak_3169	Chr1	25880309	25881584	AT1G68840	6.55068	6.3072	6.8328	6.5919	6.60607	5.98256	6.38579	7.22829	5.97741	5.76099	5.2663	4.18032	3.73073	3.27083	4.38773	3.89949	4.1391	4.46245	4.8283	5.256	4.3362	5.01124	3.85955	3.85827	6.8985	6.96936	7.34165
Peak_3179	Chr1	25941627	25942413	AT1G69010	4.02488	5.2196	5.6624	4.95016	6.15742	6.74016	7.27695	5.30942	7.5255	5.51619	5.95273	5.56423	5.64778	6.24096	5.63107	3.3753	4.47395	4.2609	5.00864	3.86614	5.15694	5.17365	5.1277	4.37578	3.97057	4.13976	3.67607
Peak_3186	Chr1	26000141	26001374	AT1G69160	2.85332	3.32887	4.05086	4.71424	1.91686	2.98919	3.69653	4.1481	4.08549	5.10187	1.01904	2.24189	1.04302	0.849868	1.45996	0.815234	1.35872	0.75529	1.21619	3.16902	4.45981	1.75568	1.22285	1.61981	3.32887	3.45276	3.51536
Peak_3187	Chr1	26005050	26005814	AT1G69170	5.26872	3.56047	3.65072	3.24031	6.05301	6.1583	5.4793	5.11401	4.91202	4.53814	4.76161	4.99153	3.14576	3.5884	4.63269	2.55486	3.39716	4.08261	4.70575	4.5231	4.11484	4.17931	6.05086	4.84112	4.55533	4.49302	5.47929
Peak_3193	Chr1	26039165	26040070	AT1G69260	3.75749	3.31842	2.77593	4.45238	4.1766	4.0496	2.74509	3.4164	3.75749	3.63048	2.29876	1.96855	3.09526	1.98851	2.22075	3.97884	3.64863	3.60872	3.58513	3.40732	2.60539	4.07863	3.83369	4.27276	3.91171	3.05353	4.14757
Peak_3208	Chr1	26112405	26113323	AT1G69460	5.92945	5.70228	7.48738	7.39794	7.30672	8.57846	6.68426	8.59814	8.34593	7.15289	7.58038	6.10831	7.30136	6.95972	6.2675	4.83478	5.90798	5.47333	5.27479	7.36574	6.24246	6.7737	7.50169	8.05439	6.11189	7.71633	6.56084
Peak_3210	Chr1	26122262	26122791	AT1G69490	1.63759	2.57424	3.23795	2.74482	1.21888	1.8702	2.43467	2.86888	2.69209	2.65487	0.790879	1.70582	0.474528	0.632703	0.316352	0.679226	0.862214	1.42358	0.945953	2.28269	2.05318	1.95394	0.945954	1.42358	3.88306	1.96324	2.62696
Peak_3223	Chr1	26230182	26231475	AT1G69730	8.09826	6.43669	5.15748	7.24461	7.32845	7.36656	5.21592	7.98267	5.48395	6.25503	6.89527	6.30584	6.34777	7.25604	7.19634	6.64629	7.74639	7.26621	6.59929	7.01595	5.24767	8.55177	9.49307	8.62799	9.15262	8.16305	8.45141
Peak_3224	Chr1	26231773	26232756	AT1G69740	4.94139	7.32689	8.60483	8.16716	9.34821	8.11036	10.0164	10.0565	9.71238	7.61755	8.74014	9.61549	7.66767	7.87314	8.02516	6.13414	5.9437	6.63028	5.52774	7.43881	7.07129	8.12205	6.64699	7.41208	3.83383	6.88253	4.33666
Peak_3229	Chr1	26266716	26267557	AT1G69790	2.38955	4.006	4.57801	4.32617	4.31641	3.99429	5.47995	6.30965	6.30184	3.83811	3.41252	3.93767	3.0865	2.92836	3.44375	3.38519	4.52335	3.79126	3.06112	2.3544	2.19627	3.92791	3.50232	4.04505	2.62381	2.37588	2.51449
Peak_3232	Chr1	26294076	26295798	AT1G69840	3.54421	4.03744	3.87335	6.02564	5.98365	5.53812	6.4559	4.92469	5.96553	2.4652	2.53008	2.60163	3.59382	3.48601	4.14334	3.0672	3.64915	4.33892	2.53962	2.75618	3.09391	2.25532	2.06356	2.7247	2.28585	2.18949	2.07215
Peak_3242	Chr1	26363555	26364824	AT1G70000	8.59559	10.2963	11.8922	11.7537	8.94505	9.95721	9.10944	8.88552	9.74365	8.61241	8.89069	7.12653	7.20678	6.50914	6.44701	8.47004	8.92306	8.914	8.7975	8.80138	7.27408	9.62587	10.3546	10.0879	8.05456	8.26942	6.57127
Peak_3245	Chr1	26400624	26402428	AT1G70090	10.7151	12.1777	13.6685	11.6887	13.8169	13.7787	11.7688	12.9281	12.4919	11.4719	12.1932	11.3681	11.0539	12.5957	11.3836	11.4719	11.675	11.614	9.5367	8.74896	7.75631	11.3453	10.8681	11.0202	11.1805	12.2141	10.7097
Peak_3255	Chr1	26452858	26453721	AT1G70250	4.22553	5.87693	7.00132	4.96751	5.49642	6.20986	5.04552	6.02913	6.00249	5.17108	3.39982	4.51661	2.76058	3.55583	3.3827	4.26168	4.23884	4.49188	5.64101	4.30733	3.39602	4.89332	7.53213	6.69882	4.63837	5.30807	4.5813
Peak_3257	Chr1	26472962	26474800	AT1G70290	5.17718	6.79683	8.63012	7.42252	7.64241	7.62542	10.703	12.3566	11.7398	7.50565	8.75257	8.92865	7.77828	8.67748	8.18497	7.29381	6.50275	6.85761	7.65581	7.87391	6.77895	7.26878	6.82633	7.47616	5.42477	6.3794	5.55259
Peak_3270	Chr1	26561825	26562911	AT1G70480	3.16811	4.2554	4.03159	5.16727	4.40662	6.14265	4.39604	5.2444	4.9359	4.17525	3.67319	3.36621	3.54768	4.07393	4.17071	3.65202	4.06033	3.37075	3.88944	2.95035	3.75334	2.92464	3.69285	3.60212	3.7488	4.47921	3.85617
Peak_3282	Chr1	26620743	26622947	AT1G70600	9.08594	10.8184	11.6258	11.1509	10.6201	11.0302	10.7446	11.5654	11.7466	8.29349	10.351	9.80309	9.01661	9.56677	8.04077	9.94325	9.17167	8.21894	8.50073	7.84322	7.67996	10.7648	10.4792	10.5933	7.98411	9.05985	7.42798
Peak_3287	Chr1	26640510	26641474	AT1G70650	6.34349	8.15081	8.96333	8.70953	7.85782	8.81002	7.26504	7.78117	7.43026	4.4016	6.09649	6.28898	4.39139	5.99429	5.97044	6.37075	6.66203	6.08117	5.01653	4.59579	5.62295	8.89009	6.42866	7.18498	5.01994	7.72836	5.3521
Peak_3296	Chr1	26695147	26696483	AT1G70780	10.2414	11.1942	10.0656	8.51279	10.6963	10.9139	8.44394	9.1226	8.98612	7.03743	9.62913	7.62142	7.98289	8.31975	7.10751	9.30579	9.30702	8.56688	9.05497	7.88453	7.14808	10.3287	11.2397	11.477	12.0389	11.102	10.9102
Peak_3302	Chr1	26742891	26745118	AT1G70940	14.0725	14.8192	14.707	12.1934	15.4721	14.2194	10.8255	10.7931	10.146	11.5132	13.9574	13.77	7.45681	10.3548	8.76638	13.2684	15.2567	13.5679	12.4251	13.019	11.8009	16.2047	16.0631	14.9365	16.4895	16.2593	16.0196
Peak_3332	Chr1	26931951	26933138	AT1G71480	7.8329	10.4674	9.61091	10.2253	12.0544	11.4276	10.7427	10.1242	11.0762	8.30473	8.04183	8.96058	5.66471	8.21202	6.44509	6.69277	8.64788	7.71806	6.69691	8.4168	8.70875	8.13731	9.85582	9.56386	7.82598	8.45693	8.10271
Peak_3337	Chr1	26971295	26972414	AT1G71697	2.99111	5.58154	5.66373	5.98956	6.30363	6.44159	6.87603	5.91324	6.57075	3.29345	5.73711	3.59285	3.3683	4.04196	2.76949	3.21273	3.2186	2.84434	4.90788	3.74255	3.8585	3.46957	3.99499	3.30813	3.78071	3.50333	3.93041
Peak_3369	Chr1	27137096	27138467	AT1G72130	5.17937	6.52484	6.17499	8.10632	5.86947	5.68257	5.78202	5.80358	5.59271	4.2161	3.63143	4.11426	2.87184	3.23845	2.92096	2.1386	3.84949	3.08869	3.78838	4.62585	4.29997	3.78838	3.66378	3.85667	5.07154	4.83552	4.34549
Peak_3382	Chr1	27232457	27233030	AT1G72320	2.39982	2.18504	1.98457	2.61173	3.5224	2.79501	4.834	3.78873	3.66559	2.30245	2.96397	3.01552	2.04471	2.13922	2.0848	2.83511	1.38605	2.42845	1.79557	3.14725	2.28527	2.92102	2.48	2.62892	2.64323	3.58541	3.14152
Peak_3396	Chr1	27297646	27298747	AT1G72500	2.50297	3.43674	4.10798	5.69807	2.73865	4.31233	5.23715	6.37378	6.20075	4.37647	2.54623	3.96776	4.10798	3.66049	3.36514	3.26669	4.57785	2.7491	3.5337	4.16914	5.80397	1.89737	1.67661	1.66915	2.39408	1.67362	1.63335
Peak_3398	Chr1	27308525	27311578	AT1G72520	2.01302	3.76446	4.97981	5.44539	6.18277	6.06867	5.41417	6.89003	5.57241	2.07976	1.15291	1.70192	1.86608	1.67447	2.08515	2.25093	2.19602	1.92152	1.14107	1.05549	1.09909	1.18036	0.741158	1.1696	1.7945	1.06195	1.58028
Peak_3410	Chr1	27382148	27382960	AT1G72740	8.36654	8.24725	9.26628	7.44861	9.72524	10.2064	8.55862	9.31683	10.1539	8.44741	8.54851	8.68195	5.46312	8.42719	6.60346	6.10204	8.19064	7.88129	5.29935	7.76604	7.32931	8.10168	8.23714	8.73655	6.59941	7.52544	6.59941
Peak_3412	Chr1	27389954	27391082	AT1G72770	5.6477	7.00321	7.82001	9.10854	9.24394	10.448	7.86514	7.10367	7.07455	4.72462	7.71372	6.58097	6.08304	4.65036	5.15413	5.11336	6.05974	5.89231	4.1233	4.35189	5.10608	7.51717	9.04011	7.96852	5.77582	8.31649	6.65814
Peak_3424	Chr1	27437833	27440764	AT1G72920	2.5352	3.02688	3.46642	4.41278	4.0848	3.88297	4.07696	4.46828	4.63198	3.00221	2.05305	3.15134	3.65536	3.33971	3.20853	3.2517	4.401	3.83084	2.82841	3.12667	3.56173	2.53576	1.97793	1.80133	2.2874	2.14444	2.31599
Peak_3425	Chr1	27442094	27443685	AT1G72940	2.49459	4.38309	5.53333	4.58237	4.48015	5.41665	5.89265	6.06612	5.70783	4.47602	2.42232	3.25763	3.43316	3.93807	3.94839	4.59889	4.03513	4.82811	2.59062	2.00104	2.47497	2.84359	2.63295	2.26434	2.21168	1.42179	1.68509
Peak_3433	Chr1	27484350	27486486	AT1G73080	3.55603	5.56904	6.39362	7.49282	8.63585	8.35201	8.51278	8.92738	8.73969	2.87067	2.52068	2.86374	4.82522	4.93598	5.3675	5.09982	4.33216	4.85752	2.09685	2.67144	2.50376	2.91451	2.90298	3.09912	3.6091	3.21604	4.09909
Peak_3458	Chr1	27628885	27630458	AT1G73480	1.91741	4.70579	6.35689	9.07008	5.40132	5.56319	9.73219	11.0011	9.47423	10.1008	2.82285	5.54439	6.01852	5.92766	5.34179	4.44575	4.06561	4.66402	3.05573	7.44926	8.68054	2.18371	1.38479	2.29023	2.39676	2.07719	2.98263
Peak_3461	Chr1	27644809	27646781	AT1G73530	4.32817	5.54623	8.59802	7.95401	9.05375	8.36391	8.65218	9.59613	9.48281	5.06717	4.93303	5.43041	6.17441	6.7876	6.24439	5.89698	5.87115	5.65453	4.53729	3.83162	4.24236	4.27568	4.72058	4.53896	5.60871	4.59478	4.88637
Peak_3465	Chr1	27689514	27690378	AT1G73650	4.11042	5.30763	5.35704	4.51709	5.54517	5.79982	5.20501	4.46198	5.45395	4.82685	3.9831	5.22972	2.90751	2.81059	3.80257	2.80679	4.08192	3.52892	3.19826	3.53272	3.4358	7.06354	4.74893	6.42693	4.03631	4.5513	5.01878
Peak_3468	Chr1	27699936	27701073	AT1G73670	5.08015	7.64694	7.38405	8.51795	8.91228	7.41149	8.69273	8.86317	7.35227	7.33782	7.31471	7.67149	7.5805	7.61371	6.71526	6.77738	6.49571	7.06194	5.59292	5.91504	6.40904	6.12737	7.01427	7.79861	4.64103	5.00937	4.52836
Peak_3470	Chr1	27712567	27713720	AT1G73687	5.25329	5.96693	7.7674	7.84005	7.40274	7.96966	8.31581	8.51665	9.40121	5.68773	6.81873	6.61219	7.65202	9.71886	7.756	6.88426	7.91839	7.71042	6.1934	6.00111	5.59372	5.50256	4.69491	4.64506	6.0296	6.05239	7.17483
Peak_3473	Chr1	27731848	27732600	AT1G73730	3.77002	5.83731	5.40289	5.28938	6.02722	5.59062	4.74581	5.49676	5.07326	3.88353	4.25027	4.45111	3.22864	4.48167	4.03852	3.37053	3.25047	4.35942	4.01451	3.33997	4.10401	6.65811	5.02742	5.49676	3.53425	5.17804	4.72616
Peak_3480	Chr1	27760057	27760573	AT1G73830	2.73753	2.1684	0.941125	3.11907	2.37507	2.99188	3.01096	3.05548	2.33373	2.34963	2.13025	1.83456	1.43076	0.486459	1.71374	2.82337	1.64379	2.25425	2.2765	2.91876	2.5563	3.24307	2.38143	2.23517	3.35752	3.72953	3.09681
Peak_3482	Chr1	27779018	27780781	AT1G73870	2.98659	6.37294	9.18807	8.17422	3.1888	4.88384	7.99903	7.07929	7.67474	5.6815	0.332671	2.82351	1.84041	1.99882	1.76772	1.49376	1.89818	1.66709	1.31578	4.81861	6.81464	0.949558	0.855441	0.970991	2.5188	2.66137	2.4955
Peak_3514	Chr1	27938329	27940306	AT1G74310	2.10169	2.75488	2.79727	3.35074	5.92196	5.23137	2.95433	2.41416	3.00502	1.56733	1.56733	1.60473	1.71692	1.90723	1.44102	1.62634	2.44158	2.68674	2.07011	1.4834	1.44102	1.18672	1.35625	1.52911	1.61969	1.65293	1.37952
Peak_3522	Chr1	27975212	27976146	AT1G74430	1.61039	2.65819	4.56217	3.76577	2.33119	3.59172	5.04037	5.03158	5.09662	3.19791	1.25526	2.42085	3.19088	3.67259	3.31395	3.76577	3.27527	3.67611	2.06221	1.56467	2.42085	2.0833	1.52424	1.79322	1.97958	1.25526	2.24153
Peak_3523	Chr1	27979264	27980467	AT1G74440	3.96885	5.8461	7.18953	7.24687	8.02644	7.57043	7.64416	7.82438	7.04071	4.16954	4.38662	4.28422	4.52452	5.22217	4.631	3.72447	5.4529	4.19548	4.43713	2.62678	3.20293	3.96885	3.20293	3.27256	4.11766	3.36676	4.72111
Peak_3524	Chr1	27982492	27984232	AT1G74450	5.97656	8.86664	11.3337	9.63047	12.0437	10.6511	11.5528	10.0771	10.9976	6.16633	6.66296	7.46361	8.00179	8.32091	8.64287	7.22852	8.72124	7.70438	5.3534	5.03428	4.43001	6.69318	5.80189	5.83965	5.63382	6.29002	5.96994
Peak_3525	Chr1	27984309	27985246	AT1G74453	1.88563	3.14213	3.97979	4.33378	4.1638	3.48034	3.62229	3.051	3.89392	2.05561	3.42251	2.20106	2.75133	3.1281	2.47444	2.75308	1.53864	1.59472	2.20807	2.78112	2.19581	3.07553	2.93534	3.43478	2.56557	2.61114	2.2957
Peak_3545	Chr1	28098759	28099309	AT1G74790	2.28818	2.72672	2.27028	2.82219	3.02206	3.45762	0.993433	2.35381	3.00416	0.93675	2.65214	1.67362	1.84367	1.52147	2.46419	1.06503	1.46181	0.60859	1.53341	0.912884	1.61992	2.41944	1.74522	2.51192	1.53937	1.86754	2.15691
Peak_3552	Chr1	28131972	28132888	AT1G74890	3.8128	2.99539	2.70499	2.9936	3.55467	3.07067	1.50218	0.914212	1.46453	1.18847	1.91984	1.82842	1.07375	0.930344	1.09705	1.22612	1.158	1.68323	2.60998	1.00563	1.60435	1.70294	1.91985	2.70858	1.72983	2.76056	2.11882
Peak_3556	Chr1	28144021	28145070	AT1G74929	3.67269	6.40295	9.42439	11.0979	12.6728	10.86	8.46316	10.4013	10.4388	3.67269	3.67269	4.37404	6.29806	5.44329	6.21978	6.14777	6.00374	6.7865	4.39126	3.75253	3.91221	2.23555	2.95412	2.39524	4.03432	2.46725	4.92823
Peak_3558	Chr1	28149178	28150509	AT1G74950	4.96345	5.95318	5.9828	5.71747	8.02149	6.4863	7.57476	7.39705	8.22511	4.72034	5.75819	5.00664	7.21194	5.58419	5.34971	5.23618	4.61421	5.38057	5.28801	4.02802	4.46859	6.02969	5.32997	5.4324	3.99347	3.61954	3.7084
Peak_3568	Chr1	28192221	28194690	AT1G75100	5.81915	7.21204	6.9871	7.87821	7.32118	7.75375	8.01131	7.73113	8.01463	5.63413	2.32925	4.51409	2.61342	2.1722	2.3419	3.19041	3.5977	3.86923	2.15556	4.64986	4.93602	4.79161	4.17669	4.35238	6.32958	5.41519	6.19249
Peak_3575	Chr1	28213834	28214349	AT1G75170	1.78714	2.49435	3.10918	4.41211	3.17926	3.30032	3.08688	3.21431	2.07703	1.87952	1.99102	1.92412	1.13727	1.46221	0.974804	1.53866	1.36027	1.05445	1.94961	2.06111	1.62149	1.80626	3.18245	1.9082	3.43093	1.60238	4.46307
Peak_3576	Chr1	28216922	28218521	AT1G75180	6.96864	8.33196	10.325	9.58329	10.4514	9.73842	9.39939	9.23604	9.76513	5.41936	3.87728	4.05707	2.67013	2.76567	3.03998	4.24406	3.82489	3.61531	3.72421	5.26218	5.96284	6.02449	6.02551	6.44468	6.02551	6.63063	7.78539
Peak_3579	Chr1	28231751	28232937	AT1G75220	3.74319	5.86059	7.1914	6.28434	6.88535	7.21217	8.44744	7.46006	8.03199	4.75134	4.62255	6.32865	6.15832	6.1694	7.34373	4.20433	3.48699	4.56577	4.22926	3.66425	5.35789	5.36759	3.74319	4.1891	4.3802	4.00492	5.17371
Peak_3592	Chr1	28300871	28302713	AT1G75410	4.3213	6.32899	6.35753	6.66881	6.98275	5.89373	6.90516	6.59567	6.27279	5.77511	5.91335	5.71624	5.23105	6.49756	5.45848	5.18556	6.35129	5.90266	6.14525	5.69395	5.09458	4.6406	5.62706	5.17486	4.4533	4.6852	4.13489
Peak_3594	Chr1	28313513	28314222	AT1G75440	2.37771	3.58855	3.52604	3.61634	2.76666	3.80155	5.15826	5.17215	4.85959	3.60476	2.44253	2.8801	2.88705	3.3223	2.42401	3.06995	3.44964	3.42417	2.85926	3.34546	3.51215	1.55813	1.97949	1.63453	0.590374	3.42417	1.8892
Peak_3605	Chr1	28416178	28416928	AT1G75670	3.01398	2.26322	3.08402	4.86133	3.45392	4.01863	5.1787	6.67146	6.41099	3.28539	4.80004	3.165	4.41043	4.69278	4.44545	2.7951	3.23724	3.675	3.59182	3.52178	3.48457	3.0884	3.84791	3.0293	2.40549	3.21754	1.76855
Peak_3611	Chr1	28441631	28442248	AT1G75750	2.16778	2.67581	1.56399	1.55601	2.29013	1.35652	0.691562	0.949567	0.675602	1.49218	3.62272	1.76348	0.694222	0.872431	0.614426	1.98691	1.89913	1.88584	4.40737	2.10128	0.53197	3.26098	3.08011	3.50303	4.80635	2.65453	4.12011
Peak_3625	Chr1	28526096	28526855	AT1G75990	5.64295	4.42093	4.64154	4.69345	5.17144	5.2731	6.44106	8.85916	8.53256	5.95657	6.9277	6.5081	4.84701	7.31053	5.54562	4.8535	5.2147	5.53048	4.96597	4.70642	4.91406	4.63289	6.31345	6.07553	4.66966	7.09208	6.3567
Peak_3628	Chr1	28537841	28538496	AT1G76040	2.67366	2.80897	3.32266	3.9892	4.89879	3.76367	3.91152	3.13723	3.14475	2.58095	1.75655	2.44062	2.75886	3.41286	2.4281	3.0796	3.79124	2.53334	2.36796	1.66133	1.97956	1.75404	1.57864	2.09984	4.15958	2.55589	3.22243
Peak_3636	Chr1	28556512	28557600	AT1G76110	3.69513	6.30346	7.82498	5.96685	6.08156	6.20534	6.49063	8.28838	6.57666	5.03853	4.74872	5.65439	4.53891	6.02571	5.49741	5.0008	4.90873	5.39024	4.61891	4.11777	4.41362	4.08004	4.86193	4.47249	3.92003	4.66721	4.14041
Peak_3671	Chr1	28766738	28767402	AT1G76650	2.39524	3.59656	4.49385	3.1541	4.01925	3.46308	3.77701	3.66577	3.5669	3.07005	1.79952	2.08131	2.35816	2.34827	1.38671	1.89098	2.04176	0.98133	1.89097	1.26065	0.630325	1.89098	0.50426	1.26065	2.39523	1.32986	2.23703
Peak_3689	Chr1	28873640	28875422	AT1G76890	5.46793	5.82471	6.43963	6.80379	9.49765	8.70387	7.00754	6.92364	6.38155	6.9264	9.64239	7.51551	5.5343	6.21007	5.6689	5.23652	6.1059	6.17689	7.35233	6.41197	5.62004	9.41468	8.62459	9.49028	7.89719	7.38184	7.85294
Peak_3690	Chr1	28881796	28883000	AT1G76900	3.42399	5.48794	5.68437	6.90119	6.15227	6.86026	6.8739	6.45648	6.02813	4.81268	5.83033	5.21238	5.60798	6.16182	7.1399	5.08415	4.43618	4.50166	4.85634	3.86597	3.98601	5.1278	6.01859	4.7704	4.14698	5.51931	4.18927
Peak_3696	Chr1	28924628	28925327	AT1G76970	3.4637	3.14903	2.55022	3.09972	5.64054	4.4758	2.5831	2.4375	1.87627	1.82226	4.41005	2.16276	2.04299	2.93299	1.99368	2.40463	2.83671	3.53649	3.00109	2.8414	1.50524	3.44256	4.24098	3.61164	3.23357	3.14433	2.63476
Peak_3698	Chr1	28932125	28934386	AT1G76990	3.51431	4.2926	4.70682	4.75115	6.46106	5.2998	4.11601	4.41178	4.47863	2.50928	5.18498	4.24173	2.35959	2.59939	2.409	3.44018	2.46278	3.36533	4.67266	2.47586	2.89225	4.2301	4.15089	4.08331	4.41323	4.84344	4.54767
Peak_3703	Chr1	28952665	28953574	AT1G77060	3.6922	5.33419	5.82732	5.24025	7.18389	6.85514	7.5813	8.92884	7.47652	5.73881	4.37681	4.90427	5.32877	6.52277	5.49495	4.52494	5.36309	4.47436	3.22797	4.375	4.59177	4.31359	3.8891	4.29553	3.918	3.4935	4.03902
Peak_3707	Chr1	28980669	28982193	AT1G77130	5.38732	4.5541	4.78585	5.25474	5.74302	5.33557	5.8271	5.68482	5.22994	5.18898	5.68266	5.71715	3.76077	4.92597	5.01759	4.97448	4.55626	5.1685	4.56488	4.23289	4.5347	5.37654	5.19222	4.67267	4.56272	4.42152	4.67267
Peak_3732	Chr1	29116554	29118417	AT1G77480	4.90403	6.34411	7.37589	6.92614	7.4429	8.13604	8.09637	8.26745	8.12634	6.5972	7.74803	7.57871	6.36175	7.33531	7.22332	6.48168	6.87058	6.6704	4.89873	6.04868	6.10071	6.6801	6.68451	6.16685	5.12273	4.63242	5.14918
Peak_3737	Chr1	29146121	29147566	AT1G77580	1.83818	1.91434	1.75974	3.42058	2.60892	2.8988	3.11933	3.56154	3.39671	3.49561	1.15952	2.17694	1.61764	3.07272	2.00187	2.76693	2.85901	2.4941	2.19854	2.66235	1.95754	1.4926	1.41871	1.4926	1.83136	1.80067	1.61992
Peak_3743	Chr1	29178858	29179440	AT1G77640	2.92668	2.6983	3.08457	3.43137	2.44454	2.83645	2.30074	1.72556	2.29228	1.70582	2.20206	2.00469	1.58176	0.9671	2.11183	1.06578	1.77349	1.20958	2.57705	1.82142	1.75093	1.34774	2.26973	1.58176	3.2481	2.01315	2.21615
Peak_3751	Chr1	29236791	29239544	AT1G77760	6.1854	6.89329	6.11318	7.31349	7.3093	7.36899	3.80447	4.99225	4.41387	5.54137	5.28829	5.05313	2.77009	2.28304	2.73965	3.894	4.01755	3.50902	5.78071	4.98568	4.56608	6.36327	6.32148	6.5089	6.90701	5.8983	6.24866
Peak_3768	Chr1	29354922	29356679	AT1G78070	5.34091	8.39286	8.86973	9.14276	8.47514	8.88375	10.2265	10.0142	9.05392	6.81452	5.82058	5.62703	7.61772	7.96367	8.11889	7.1502	7.72151	6.74066	3.64756	4.49844	5.10247	6.48633	5.59057	6.34327	5.05479	4.5854	4.86591
Peak_3780	Chr1	29421934	29422775	AT1G78206	4.6112	5.37648	4.3535	5.47995	4.3125	3.89082	3.93767	3.33834	3.44571	2.09085	2.87956	2.70971	1.79216	3.12749	2.19042	2.36807	2.45397	2.16894	3.08649	3.68388	2.3544	3.2173	3.13921	4.22075	2.35831	3.28758	2.20408
Peak_3782	Chr1	29430183	29432104	AT1G78230	6.7291	9.31708	11.2098	10.6632	9.6549	10.7898	9.82083	9.34103	9.72589	7.74855	7.41244	7.87598	5.78747	7.30981	6.35621	6.8916	6.41608	7.01475	4.94847	6.69061	8.55676	8.20526	8.11289	8.27539	8.22407	6.61877	7.49711
Peak_3787	Chr1	29458224	29459161	AT1G78290	3.36118	4.64747	4.11122	5.96531	6.44722	5.55698	3.15439	2.84246	2.88977	1.69811	3.68713	2.41311	2.05912	1.87686	1.60874	2.8337	3.57498	3.20346	3.04574	2.32198	2.46919	4.08669	4.33028	3.5522	4.73684	2.89153	4.68777
Peak_3798	Chr1	29536239	29537513	AT1G78510	6.07364	7.44926	8.68436	8.52192	8.12869	9.18974	7.65812	9.50174	7.5047	6.62027	5.78613	6.06461	5.52313	4.00311	5.19179	4.60132	5.9705	5.8029	4.80373	4.80631	5.16858	7.46602	7.038	8.43296	6.04914	7.89019	6.96966
Peak_3821	Chr1	29642170	29643415	AT1G78850	3.20578	2.65829	2.2889	4.9129	4.91817	3.96039	2.967	2.87861	3.3852	2.2203	2.28494	2.34959	2.20447	2.10157	1.96041	3.09497	2.9947	2.69128	4.99469	3.06198	2.7137	2.83771	2.91819	2.58705	4.6464	3.16225	3.7005
Peak_3850	Chr1	29805651	29809559		4.88091	7.58018	8.52928	9.43171	10.7803	10.3278	9.2286	10.491	9.29041	3.9461	4.43516	3.96755	4.7825	4.18201	3.84265	4.71817	4.02768	4.41792	4.97131	3.19338	3.08825	3.81743	3.37	3.30272	4.56005	3.43602	4.32288
Peak_3857	Chr1	29860626	29861761	AT1G79380	5.52319	7.37535	8.09016	7.42744	9.56465	8.09016	8.37377	7.16119	9.9727	5.90374	9.19132	6.6475	7.01794	8.26524	8.15093	5.57094	5.46097	6.4565	5.60132	5.01818	4.95741	6.7213	8.20303	7.0845	6.1888	5.67802	5.81982
Peak_3948	Chr1	30311738	30312772	AT1G80640	4.59308	3.7688	4.52479	4.56926	7.04843	5.91764	5.1553	7.42802	4.04674	3.34475	6.02246	5.86999	3.4051	3.36222	4.36438	3.83233	3.68939	5.18071	5.59364	4.6979	4.53431	7.17708	6.07487	5.89699	5.98911	6.0844	6.23528
Peak_3960	Chr1	30370827	30371599	AT1G80820	1.40775	1.87133	2.55819	1.86282	1.41413	1.40562	2.3987	3.57678	3.32373	0.825084	0.216903	1.27803	0.433807	0.810198	0.542259	0.822958	0.976066	0.506108	0.65071	1.08452	0.929282	0.459325	0.325355	0.461452	0.976065	0.91865	1.09302
Peak_3962	Chr1	30383700	30385373	AT1G80840	1.60255	3.07646	3.31605	3.30525	3.85907	3.71374	3.49379	2.99005	3.30525	1.45231	1.15183	2.05326	1.66146	1.45231	1.52399	1.38063	1.75868	1.82741	1.27948	1.07917	0.719771	1.20191	1.24119	1.04087	1.741	1.48373	1.26574
Peak_3985	Chr2	107142	108773	AT2G01180	4.67452	5.40375	5.43296	6.25989	8.9381	6.93473	8.32269	6.36968	6.9861	4.37739	3.44672	3.82543	5.18015	5.88621	5.25871	6.42105	5.75024	6.21558	3.21808	3.03073	3.58773	3.8486	3.55046	3.44974	5.75225	3.18484	4.26559
Peak_4002	Chr2	200627	202356	AT2G01450	5.37605	6.8184	8.36432	7.1196	10.0689	9.27932	9.63849	9.4038	8.40612	4.08572	6.50769	5.28197	6.15613	5.4492	5.55942	6.05731	5.22687	5.03969	4.16838	3.77976	4.06196	4.97602	5.28198	5.49102	4.65962	4.29475	5.34374
Peak_4011	Chr2	266569	267632	AT2G01590	5.46127	6.46083	6.8656	4.73053	8.16641	6.28162	7.84662	7.17922	7.71375	5.69455	5.98808	6.6524	5.89076	5.7239	7.0927	4.96535	6.84243	4.74289	3.48069	3.8731	4.96381	5.32995	5.99581	5.75635	3.50695	5.43655	4.05849
Peak_4027	Chr2	367245	368057	AT2G01830	2.15735	2.55566	2.28068	2.87107	2.76593	3.35025	1.82374	1.89652	2.65877	1.71658	1.87024	1.82576	2.43434	1.35264	1.65592	1.98751	1.88844	2.0886	2.16341	2.14926	1.21111	3.64747	2.42828	3.33408	2.24429	2.28675	1.67209
Peak_4028	Chr2	385142	387175	AT2G01850	7.03661	7.9967	8.24561	8.46382	10.5101	8.77899	9.59523	8.60363	9.49502	6.86366	10.6765	8.48725	7.70577	7.91022	7.49887	6.30281	8.31269	7.00267	7.21279	6.98973	6.18804	7.67586	8.6505	8.0161	8.83879	8.49049	8.92284
Peak_4070	Chr2	798376	799542	AT2G02800	6.39345	7.91751	8.2443	10.0571	8.86688	9.8092	9.52609	10.591	10.7262	5.97651	9.11901	7.95695	8.60348	8.33162	8.02878	7.44705	7.32733	7.94991	6.78503	7.84426	5.04546	7.90202	7.15548	7.46114	5.83002	6.82447	6.60896
Peak_4079	Chr2	863731	864499	AT2G02960	2.35987	2.56294	3.31964	4.7112	4.57867	5.99587	4.07848	3.78991	3.58256	4.79883	5.74791	4.32002	4.68768	4.52523	4.37346	3.27903	3.21918	3.56332	2.61638	1.86182	2.89426	3.9374	4.3927	4.85014	3.81555	3.29613	3.37949
Peak_4099	Chr2	1036959	1037679	AT2G03430	2.51926	3.39017	2.67429	3.53608	4.28616	3.83019	4.53467	6.22634	5.51729	4.20864	3.80055	3.81651	3.73671	3.5794	5.37594	4.01258	3.48821	3.78003	3.59764	2.35739	3.44717	3.71619	3.51557	4.6099	3.00715	3.19866	4.18585
Peak_4107	Chr2	1102260	1102863	AT2G03620	4.62112	4.4415	3.66587	4.85789	3.88358	3.55156	4.5558	5.82946	5.55187	2.84125	3.37194	3.74751	3.59239	4.28909	3.81827	3.05353	2.97733	3.04264	3.557	2.55549	3.08618	4.35169	4.70548	3.69853	3.85093	3.81011	4.13124
Peak_4114	Chr2	1138732	1140279	AT2G03730	8.87731	8.70529	9.21286	10.0411	10.2216	10.4298	9.10243	9.23941	8.17753	6.77478	7.58181	6.87991	6.0113	5.45487	6.44454	6.59002	5.19896	5.36143	6.24915	6.91601	7.61898	9.6854	9.87866	9.79371	6.86398	9.20331	7.58287
Peak_4126	Chr2	1333263	1334484	AT2G04039	7.36073	7.32845	9.0247	8.54851	10.1035	9.87618	7.55981	8.10326	7.09169	5.69407	8.19473	6.0882	4.59239	5.62547	5.03494	5.84877	7.29751	6.88454	6.30208	4.75111	6.42449	11.0693	9.54662	8.99107	7.40915	8.25526	8.36018
Peak_4156	Chr2	1682873	1683833	AT2G04795	6.05003	4.55335	4.79795	6.52555	6.44515	5.4753	3.67928	3.92559	3.80757	2.18088	3.40218	3.75112	1.04683	1.39577	1.30853	2.56917	2.16036	2.17575	4.60295	2.30575	2.90956	6.63502	6.11161	6.85055	8.08552	7.31238	7.69553
Peak_4161	Chr2	1717750	1718771	AT2G04880	6.37571	7.69943	8.02754	8.72238	8.29293	8.21572	7.6174	10.7667	9.82412	7.10753	9.38021	7.87957	6.80837	7.01103	6.20039	5.02948	6.96117	5.95592	6.76012	6.77459	5.33507	7.89887	10.289	7.5032	5.65997	5.742	6.09746
Peak_4165	Chr2	1798253	1800539	AT2G05060	1.02638	4.25718	5.97643	6.01022	2.36326	3.55567	6.59816	5.952	7.148	8.92979	0.575002	4.01064	2.82254	3.86761	3.11579	2.08726	2.29785	2.17064	0.91641	5.75218	7.67628	0.476533	0.329908	0.51319	1.75951	1.02638	1.50291
Peak_4166	Chr2	1822182	1824523	AT2G05100	2.17721	4.29547	5.61991	8.14665	3.43637	3.81468	6.15614	6.28107	6.72886	8.11015	0.715911	3.8203	2.61167	2.37865	2.6208	1.92033	2.55973	2.09439	1.21705	6.33511	8.27158	0.894889	0.787503	0.930685	2.72046	1.93296	1.96876
Peak_4201	Chr2	2360701	2362145	AT2G06050	2.32292	3.6061	3.95419	3.94054	5.32951	4.61626	6.75944	6.41362	5.77544	1.74048	2.88033	2.24101	2.01464	2.26945	2.39117	1.99189	2.26263	2.41847	3.94054	2.77794	2.57204	2.49469	2.03056	1.83376	2.95882	2.49469	2.63575
Peak_4209	Chr2	2862745	2863564	AT2G06950	2.76036	2.27925	2.0808	3.46799	1.92443	1.72999	1.21079	1.44734	1.0845	1.22683	2.1269	1.4313	1.63778	1.71194	1.86831	1.54757	1.32906	1.71195	2.74833	1.72598	1.84024	2.02066	2.87062	2.31734	1.22683	1.98658	1.84024
Peak_4257	Chr2	5741810	5742860	AT2G13790	4.2213	4.41211	5.24886	4.86568	7.56049	7.74973	5.90263	6.02462	6.30614	3.51436	4.70614	4.82657	3.98826	4.10869	4.98767	4.14779	3.35014	3.3517	3.4299	2.85903	2.39765	3.75209	3.12961	3.67233	3.6692	4.62169	3.58943
Peak_4266	Chr2	5931056	5931869		3.39864	6.41158	6.71247	6.53477	5.99357	6.56909	7.48792	7.05173	6.09252	4.44065	4.8203	4.41036	5.13533	4.63451	6.24599	4.64057	4.95762	4.65269	4.24881	4.38815	3.67732	4.98589	4.73347	4.11149	4.40026	4.7375	5.3938
Peak_4274	Chr2	6053441	6054043	AT2G14285	4.59879	3.80825	3.18944	3.75373	4.01815	4.25531	5.93999	5.74917	5.24486	3.74827	4.14354	3.31211	2.53247	3.36663	2.92774	3.12947	3.06404	3.54655	2.52974	3.1649	4.24986	5.42205	4.85231	5.16035	3.33664	4.56063	4.1708
Peak_4293	Chr2	6408174	6409203	AT2G14910	8.12479	9.43503	11.3134	10.2298	11.7299	11.0182	11.0293	10.4516	9.70792	8.72325	9.18127	11.5831	7.47844	10.0415	9.00891	8.87965	9.10627	9.09829	8.39768	8.08009	6.84326	10.5873	9.89306	9.11425	7.59334	8.70251	8.94667
Peak_4295	Chr2	6491501	6493455	AT2G15020	5.8756	6.79377	9.14636	8.19204	6.68698	7.55133	7.9213	7.4227	7.68166	4.43697	2.10119	3.3952	1.37221	1.37221	1.62949	3.96527	5.22313	4.59336	2.64688	4.5387	6.16988	5.02133	4.23601	4.8456	8.98996	6.75173	8.46614
Peak_4332	Chr2	6984506	6985517	AT2G16070	9.13992	11.3343	11.4789	11.2174	11.2677	12.9083	10.1242	10.8389	11.8281	9.24712	10.2802	8.38137	7.57572	9.06845	8.69811	10.8129	10.8373	9.79776	7.30933	8.79719	9.12854	11.1281	12.0539	12.9115	9.03109	10.6554	8.60877
Peak_4343	Chr2	7122029	7122929	AT2G16430	3.5357	3.51745	5.01529	5.2251	2.91357	3.23102	5.37835	6.59522	6.51312	4.00092	3.82213	2.97743	3.60867	4.56101	3.53934	2.72749	2.75668	2.72749	1.92657	3.29487	3.50468	3.57036	3.59773	2.32612	3.065	2.79134	2.58153
Peak_4347	Chr2	7151383	7153449	AT2G16500	8.87423	10.1967	11.431	11.7602	11.6123	11.6513	10.5347	10.6707	10.6946	8.85355	11.1566	9.37365	7.71316	8.54976	8.29767	9.66631	9.40944	9.30128	10.3327	8.07102	8.78595	10.2612	11.0143	10.4639	10.6166	11.4882	9.97963
Peak_4397	Chr2	7593163	7594063	AT2G17480	4.46614	6.71563	8.55646	5.88188	7.14072	6.75394	6.93639	7.38154	7.81392	6.77584	6.90537	6.60617	5.79249	5.58268	6.6463	5.81438	5.04995	5.50241	5.87458	4.94596	5.38929	5.99864	6.83605	6.0479	5.02441	4.39864	4.16329
Peak_4435	Chr2	7864197	7865493	AT2G18090	7.43697	7.89576	10.0288	10.1048	12.2112	11.0439	9.30255	10.2151	10.8044	8.59662	11.1859	9.60798	8.66886	8.9198	9.26959	9.19736	7.80831	9.05415	7.36599	6.84383	5.84514	8.0149	7.99082	9.68277	7.69171	8.07953	9.04907
Peak_4457	Chr2	8080435	8081489	AT2G18630	4.15076	4.60884	4.81763	6.86964	6.93507	5.70418	8.20025	7.88707	8.41526	5.30998	4.25671	5.36763	5.53123	5.67613	5.4206	5.93634	4.61819	5.52812	5.40814	4.59949	5.40347	5.18066	4.29099	5.12457	3.73942	3.65529	3.3686
Peak_4482	Chr2	8262638	8263380	AT2G19080	4.78756	5.65039	4.96455	6.42471	6.78311	6.13489	7.11055	8.157	8.42026	4.84066	6.24551	6.87161	4.51323	7.20125	5.30304	4.76765	5.2588	4.115	6.57958	4.86057	3.75438	4.73225	6.23888	6.0641	3.05306	4.60836	3.61058
Peak_4511	Chr2	8487999	8488891	AT2G19620	2.91022	4.0294	4.78411	6.21989	6.59356	4.90375	4.75834	5.53881	4.03676	3.10718	5.28663	3.72567	3.86925	4.69391	3.2121	2.76849	2.70958	2.30462	4.38282	4.32576	3.53608	3.75513	4.22452	3.85453	4.13064	4.09751	3.19186
Peak_4513	Chr2	8494099	8495954	AT2G19650	10.3968	11.4419	12.8235	10.976	12.1433	10.6377	9.86008	9.07892	9.89195	7.42096	7.18183	8.60774	4.59393	4.25206	3.87123	6.66461	5.72935	6.27757	6.14295	6.84528	7.42981	11.3808	10.8688	11.1567	9.86715	11.3196	10.2081
Peak_4514	Chr2	8500800	8501893	AT2G19670	2.19372	3.43333	3.67824	4.07041	4.31081	4.35288	5.17027	3.91264	4.69096	4.2432	3.96823	4.13802	4.4791	4.53169	4.09294	2.26134	4.25973	2.92246	3.67223	2.60692	3.25302	3.82549	3.38675	3.95471	2.063	2.98857	2.83531
Peak_4515	Chr2	8503103	8503717	AT2G19690	3.26887	3.40786	3.95311	4.59726	4.23376	3.92905	4.2391	4.36205	4.00389	4.37274	3.30361	3.85689	3.0203	3.51744	2.40287	3.57892	3.83283	2.90269	2.76637	2.9214	3.75265	2.35476	3.22878	2.53384	2.72628	3.40786	3.11651
Peak_4547	Chr2	8741725	8742717	AT2G20280	7.56507	7.61804	8.61127	8.12459	8.78011	8.01367	9.75348	10.9669	10.6391	6.72082	9.78823	8.34806	10.3163	7.85145	7.61804	7.13798	7.63294	6.63806	6.24904	5.4495	7.37139	8.07824	7.92263	8.63113	6.24739	6.87643	6.66951
Peak_4549	Chr2	8756442	8756899	AT2G20300	1.10543	1.53971	1.51817	2.57336	1.6402	2.76716	2.79947	1.46793	1.81606	2.22163	1.20233	1.52176	1.46434	0.549126	0.732167	1.83042	2.1965	1.36384	1.46433	2.41185	2.47645	2.00269	2.24316	1.91656	2.60924	3.59983	2.42261
Peak_4574	Chr2	8911986	8913589	AT2G20670	3.39723	4.54604	5.8168	7.16749	4.05413	5.2634	7.04964	7.69424	6.35584	7.18389	2.18386	4.83503	2.6317	3.20354	2.57944	2.56099	2.03834	2.5282	3.36649	5.15785	6.16728	2.50873	2.84281	2.65425	4.62802	3.65856	4.12894
Peak_4601	Chr2	9053302	9054697	AT2G21120	7.49125	9.89453	9.32815	8.57808	9.72378	11.1862	10.1489	7.08619	10.1489	6.80241	9.89099	7.65021	5.70734	7.19216	7.7185	6.55867	7.6455	7.29579	7.09796	5.87807	5.64493	8.50743	8.88776	6.84598	5.97698	7.14624	7.32404
Peak_4616	Chr2	9119230	9120038	AT2G21300	5.28898	4.77491	5.79288	6.11595	7.26802	7.22942	7.31476	7.12579	6.34352	5.34587	4.47216	4.94152	4.40511	5.42714	4.92324	5.43934	4.54125	5.10408	4.462	4.14503	5.24021	5.18129	5.6283	4.62455	3.31602	5.61814	4.14096
Peak_4617	Chr2	9126177	9127538	AT2G21320	5.46361	8.27808	11.9181	10.9876	6.30601	8.79342	7.93653	10.1005	8.15015	6.22032	3.18137	4.13119	4.66223	4.49809	5.25481	3.87775	4.10344	4.84809	2.46206	4.96878	5.3586	4.37016	4.18551	3.13913	4.67792	4.97723	3.95137
Peak_4627	Chr2	9209520	9210277	AT2G21500	3.36348	4.47596	5.14823	3.57383	6.33878	4.9769	6.88093	6.96767	6.39733	3.10758	4.40657	2.91675	4.51066	3.65624	4.51716	3.8731	3.45239	3.92297	2.61315	3.36564	2.53291	4.64728	2.37243	2.76495	3.28107	3.42854	3.15746
Peak_4659	Chr2	9471326	9472181	AT2G22300	6.1162	7.07828	7.46234	6.16997	10.3006	8.24006	9.3865	10.6635	9.38073	6.36008	7.52955	7.12244	7.41433	5.88576	7.3452	5.26742	6.84976	6.07395	5.97025	6.92273	6.84015	6.09316	7.24919	5.37112	4.52042	5.77823	5.00049
Peak_4661	Chr2	9490371	9491047	AT2G22330	3.90187	2.52274	2.16339	2.40862	3.08119	2.97193	2.72427	2.48389	2.7704	1.974	1.48596	1.35485	1.11447	1.36213	1.36213	1.16789	2.28237	1.2383	1.84774	2.47661	2.10512	1.11447	1.80404	1.36214	2.60044	2.31393	2.34549
Peak_4667	Chr2	9513300	9514072	AT2G22420	4.17008	3.36839	2.824	5.36305	4.88671	4.61451	1.76075	2.06058	1.62678	2.67089	2.67727	2.09886	2.06058	1.89897	2.57732	3.41729	2.27111	3.45132	2.75595	2.6879	2.47738	4.15094	2.88354	4.01697	2.99837	3.04941	3.80857
Peak_4676	Chr2	9563394	9564765	AT2G22500	4.58272	6.94896	8.5628	8.28963	7.59353	7.14185	7.74929	7.88228	7.84873	6.37387	4.76603	4.53599	5.42139	5.65501	6.40502	5.98809	6.21333	5.26084	4.85828	4.43296	4.69893	4.70013	3.54397	4.58272	6.63386	4.3443	5.88744
Peak_4684	Chr2	9636372	9637247	AT2G22670	4.94263	4.05693	5.40611	7.25256	7.85115	8.5811	7.06679	7.06491	6.26929	5.5506	5.44364	6.38563	5.34231	5.85271	5.53934	5.05334	4.69868	5.07398	4.7531	5.63504	3.48836	4.785	6.56577	6.25803	4.97828	4.78876	4.55795
Peak_4703	Chr2	9786248	9788342	AT2G22990	5.3786	7.20286	8.02593	8.4151	8.09105	7.83369	7.83526	10.0612	8.31074	6.06985	4.25737	5.08672	4.68186	4.68499	4.75482	4.2817	4.14203	4.20167	4.5979	6.55632	6.01022	5.20206	6.48257	5.86585	5.97099	6.26837	5.99139
Peak_4704	Chr2	9792199	9793454	AT2G23000	3.24046	5.98229	7.05678	7.8983	4.67223	6.38015	5.42738	6.70341	5.57396	4.23118	1.75111	1.78775	1.47889	1.79299	1.33231	1.94088	2.26937	2.34135	1.80215	2.20262	3.5153	1.74718	1.80084	1.57443	3.07032	3.18942	3.27056
Peak_4735	Chr2	10045568	10046606	AT2G23610	6.92638	5.05319	4.37447	5.13546	7.60193	5.77303	7.22698	5.80626	7.85822	6.25873	6.78715	6.39163	3.48534	5.24462	4.1419	4.59122	4.80955	4.31119	5.41548	4.75259	3.56919	7.01023	6.19071	6.05148	6.17963	6.01826	6.5799
Peak_4737	Chr2	10066104	10067101	AT2G23680	2.10333	1.78709	2.13956	3.24146	3.10804	3.17063	2.03744	3.27934	2.43439	2.55957	3.27605	2.35203	1.34402	1.69649	1.91556	1.93203	1.91556	2.10497	3.29911	1.93203	1.21884	2.60404	3.06852	2.94004	2.85604	2.68804	2.01603
Peak_4738	Chr2	10072202	10072832	AT2G23690	4.87666	4.13943	4.87927	6.30684	3.70959	5.09548	4.58229	2.86035	2.5243	3.62884	1.46143	2.50085	1.59429	1.32858	2.1127	2.28203	3.53506	2.26379	4.15506	2.76396	4.09254	2.96195	2.68581	3.01405	7.64843	5.17364	6.24431
Peak_4746	Chr2	10135420	10137590	AT2G23810	5.52195	8.96777	10.9387	12.2463	12.9565	12.2061	13.2397	12.3	13.1238	6.23822	6.8977	5.75364	9.03592	8.52104	8.69292	8.70277	7.98574	8.14777	3.16643	4.03338	3.72067	3.97356	3.5912	4.13181	5.59918	4.90411	4.96089
Peak_4751	Chr2	10182185	10182773	AT2G23930	3.90435	4.32855	5.11835	4.66066	4.89787	5.58441	4.9816	4.86997	6.06164	3.52479	3.40758	3.68945	3.12571	3.02803	3.40758	4.57135	2.41126	4.05784	3.19827	2.98896	2.32475	3.69504	4.99556	5.02905	4.03272	2.80756	2.56196
Peak_4760	Chr2	10244831	10245791	AT2G24100	2.966	4.38572	4.56019	5.77122	6.95488	6.27581	4.01112	4.62348	4.56019	1.483	2.18088	2.29378	2.3947	1.40945	1.30853	2.23049	2.29378	2.23049	2.34338	2.3793	1.77892	2.84798	2.59483	2.23733	4.29506	3.61086	3.83836
Peak_4764	Chr2	10272864	10273665		2.49233	2.50873	1.45522	2.67064	2.76492	2.50872	2.01887	1.67248	1.92458	1.88154	1.38144	1.0453	0.522651	0.836241	0.805497	1.67248	1.71143	1.88154	1.46342	0.871085	0.674322	1.67248	1.25436	1.35889	1.61509	2.16644	2.04961
Peak_4776	Chr2	10348917	10349869	AT2G24330	7.00982	7.93089	8.05853	8.438	8.78297	8.80884	8.05853	10.3233	9.20211	6.53548	6.74074	8.41212	6.86148	7.18575	6.13014	5.20389	7.64802	6.77351	7.56004	7.01326	4.8296	6.94945	7.5083	7.65319	5.0797	6.50961	6.06114
Peak_4786	Chr2	10421722	10422489	AT2G24530	4.61031	4.73017	4.56965	3.87831	4.55466	6.78062	8.48221	7.26435	7.65603	5.94803	7.27505	5.38726	4.90782	5.37442	4.69378	3.42242	4.11803	3.79056	3.46094	4.98487	4.61031	6.28193	6.47884	5.07691	5.56919	5.05765	4.75157
Peak_4787	Chr2	10426261	10429322	AT2G24540	5.6781	7.94945	9.23517	8.58238	6.58857	7.58708	8.70639	8.28981	8.59097	6.23104	3.88883	4.31454	4.57222	5.46068	4.46539	5.6314	4.56578	4.62376	3.71275	5.45317	5.79084	4.79286	5.22555	5.20032	5.62388	4.77783	5.05376
Peak_4788	Chr2	10438372	10439225	AT2G24570	2.45798	3.29913	1.96331	2.50995	3.27025	2.816	2.22701	2.8314	1.83434	2.39831	2.45413	2.23663	1.27615	2.2578	2.27705	3.1028	3.82653	3.80535	4.0652	2.47723	2.2578	3.09895	3.43579	3.17016	4.73311	3.0566	4.12487
Peak_4791	Chr2	10452594	10454583	AT2G24600	4.5357	6.28274	6.43143	7.42844	9.14243	8.4461	6.23236	7.87201	7.33014	3.83193	4.00209	2.56976	3.67251	4.25072	3.85836	4.29698	4.2152	4.62326	2.27817	2.35582	1.68509	2.90678	2.90678	2.9613	4.28789	3.25454	4.60756
Peak_4813	Chr2	10667952	10669318	AT2G25080	5.10212	7.4205	8.09509	8.27907	6.20719	6.92507	9.01138	10.6936	8.55443	6.80723	6.01119	6.37794	4.13533	6.08454	5.29692	6.02442	4.23754	6.06651	5.21274	5.58431	8.47988	4.96744	6.07132	5.15743	5.3354	4.4636	5.27768
Peak_4821	Chr2	10739772	10740519	AT2G25210	4.87423	7.54429	7.20147	6.25211	7.39704	8.0695	5.97522	4.8105	6.2631	4.91818	6.54219	5.22144	5.82578	4.65227	5.10937	4.98411	4.65227	4.20836	5.76864	3.69852	5.03904	6.77294	5.2654	5.37088	2.68983	5.8961	5.55987
Peak_4834	Chr2	10833398	10835490	AT2G25460	3.4368	2.9962	2.71583	4.40909	4.33684	3.9253	4.62114	3.51926	4.21746	2.66792	1.67363	2.17863	2.52341	2.55561	2.33884	2.87133	3.45486	3.11794	2.49906	2.85091	2.56346	1.77495	1.44195	1.96422	3.48078	3.42109	2.94986
Peak_4836	Chr2	10848706	10850635	AT2G25490	6.29665	6.91669	7.12025	6.32731	6.94479	7.24459	6.0965	6.97631	6.19444	5.38617	5.3257	4.61368	3.94595	4.78061	4.98672	4.78998	5.51649	4.72185	5.61698	4.9748	5.36318	5.77966	6.79575	5.88783	7.74539	5.73878	6.6748
Peak_4874	Chr2	11111034	11112064	AT2G26080	3.54586	2.59562	4.14535	4.17564	3.43107	3.17278	1.46363	1.37275	1.64698	0.569187	0.695142	0.243937	0.243938	0.406562	0.569187	0.841824	0.947052	1.10968	0.870522	0.52614	0.406562	0.985317	0.731813	0.813125	3.26685	3.06596	3.62717
Peak_4875	Chr2	11112108	11114012		11.1778	12.4436	15.235	12.0182	12.63	13.5809	7.39317	8.53735	7.97302	7.2318	11.9431	9.15775	6.50095	6.73133	6.70458	9.63752	10.3563	9.68584	9.06542	8.41999	6.77016	10.2994	11.2658	11.0017	11.3098	11.7939	11.3538
Peak_4881	Chr2	11148537	11150532	AT2G26190	3.82206	5.86197	5.65197	6.31986	6.27456	7.27434	6.72257	6.54468	6.16503	5.08207	4.50065	4.90336	4.31948	4.64724	4.92313	4.87207	4.82595	4.15806	4.60524	3.939	4.46112	5.15866	3.65405	4.60524	4.79218	2.79428	4.11606
Peak_4887	Chr2	11167941	11168535	AT2G26240	3.67988	3.60529	1.26807	3.55003	5.05016	4.52801	3.25995	4.20202	3.25995	2.67703	3.39808	2.62177	3.23509	3.84287	3.75999	1.29293	2.74886	2.38695	2.94224	2.67703	2.9229	4.16611	5.48943	4.36778	4.12466	5.72702	4.08599
Peak_4911	Chr2	11314447	11315130	AT2G26590	5.21494	5.64031	5.54178	4.98664	6.62802	5.90226	6.58477	7.07742	6.88036	5.78931	7.83202	6.94765	6.48383	5.1116	4.71027	2.81655	4.4315	4.655	6.52709	3.79946	3.80426	5.75566	7.78877	5.62109	5.77729	5.88303	5.90706
Peak_4934	Chr2	11516860	11518315	AT2G26980	6.08631	5.12216	4.74396	5.20119	7.55284	6.60112	6.28049	5.34796	5.90567	4.38946	7.55849	6.83594	4.47978	5.007	4.26075	4.29688	4.87492	4.89637	7.06738	4.47639	4.17834	9.33212	12.6626	10.1292	7.64542	7.83735	7.9796
Peak_4941	Chr2	11566218	11567219	AT2G27080	3.03658	5.84513	7.41017	6.21917	5.36446	6.334	6.84748	5.96325	5.35461	2.63301	2.66582	2.5149	3.94706	2.34264	3.36304	3.01197	3.29742	3.04642	2.52638	2.22125	1.79471	2.42467	1.58965	3.01033	3.51397	2.55099	3.76496
Peak_4953	Chr2	11669612	11670600	AT2G27260	9.56688	10.0389	12.5121	11.4267	12.1132	11.2472	13.4578	11.6129	13.8534	10.6771	12.7979	13.5691	9.21951	13.8234	10.8217	10.1154	11.0777	11.1425	7.35466	10.009	9.54693	12.2063	10.8201	10.4677	7.20508	8.98184	8.29207
Peak_4962	Chr2	11726297	11727562	AT2G27420	2.07746	5.28713	7.75022	6.28042	3.19279	3.58102	3.5953	3.11229	2.64876	2.43842	1.25816	1.72559	1.3906	1.12572	1.65547	2.4501	2.30079	2.10213	1.92035	1.45682	1.98657	1.15169	1.00367	1.4672	2.65785	1.25816	2.97076
Peak_4963	Chr2	11738867	11739749	AT2G27450	6.99588	6.02226	7.07406	8.47026	10.2425	8.51866	7.85593	9.49414	8.73832	9.84597	9.82549	8.53355	5.94407	9.5537	8.6136	7.58042	6.3648	6.91769	6.41133	6.4467	7.74237	7.23788	7.58973	7.87269	5.10635	7.62696	5.23294
Peak_4969	Chr2	11763992	11764904	AT2G27530	6.82722	8.91931	9.15697	7.79224	7.52217	7.67881	6.20787	7.80485	8.0515	6.27808	7.30252	7.26111	5.54171	7.82465	6.15745	3.401	4.98898	5.0646	6.29248	6.97124	6.10704	7.72743	7.89667	7.5888	5.5075	6.52834	5.78476
Peak_4976	Chr2	11809342	11810455	AT2G27690	4.28507	5.98198	6.10297	5.49946	5.86245	5.90819	5.2191	6.26529	5.17041	4.17292	3.15773	3.61663	2.82572	2.95262	3.78632	3.08542	2.56455	2.65161	2.89507	3.22413	3.71106	2.55864	2.49815	1.85184	4.27326	2.55127	3.52662
Peak_4997	Chr2	11942649	11943501	AT2G28056	2.49941	1.62066	1.60525	2.86555	3.14497	2.57456	1.17937	1.4665	1.08301	1.88467	1.32004	1.86733	0.884524	1.17936	1.27765	1.47421	1.03676	1.76905	2.26045	1.29692	1.27765	3.10643	3.62867	2.06389	3.69804	3.34924	2.8694
Peak_5006	Chr2	11999718	12000890	AT2G28150	6.14494	6.70408	6.27527	7.1371	9.59086	8.96025	7.93167	8.20914	7.50425	6.54572	7.85739	7.64719	6.13653	6.76293	6.05525	5.81842	5.53395	7.02499	5.87027	5.40502	5.82403	6.63261	7.78873	8.11384	5.20883	6.42381	6.76153
Peak_5009	Chr2	12024066	12025281	AT2G28200	8.23381	8.49471	9.78568	8.70019	7.44301	8.45821	8.34601	6.56704	7.94723	5.47479	5.27337	5.56401	3.59579	2.9645	3.42951	5.929	7.65254	6.36157	6.03714	5.94116	5.22335	8.23517	8.13513	6.68736	8.06619	8.31492	7.9283
Peak_5012	Chr2	12081099	12082311	AT2G28305	1.90398	2.6466	3.3865	4.33104	3.17916	3.59113	5.53712	5.95314	6.94375	3.69276	2.62627	3.19814	2.71435	2.4108	2.75636	2.99893	4.0844	3.41361	1.95412	3.50711	2.26444	1.9487	1.91211	1.90127	2.53954	1.70206	2.86071
Peak_5014	Chr2	12094667	12095697	AT2G28320	5.97408	6.91157	6.505	6.59907	8.44056	8.71638	6.10801	6.66763	6.62777	3.42629	5.55635	4.88832	3.52195	4.63481	4.58539	5.78276	4.71613	5.04457	5.28531	4.06562	3.93329	8.62072	8.0627	7.17623	5.08761	6.67879	6.05539
Peak_5016	Chr2	12114014	12115925	AT2G28350	9.07007	9.82233	10.3992	9.28242	8.8921	9.84381	8.427	7.07723	7.38587	7.26465	9.12509	8.46826	7.28787	7.86129	8.24043	9.26007	9.52486	8.88781	7.8484	7.94039	6.91044	9.7054	9.93581	7.73234	10.7904	10.1146	9.6925
Peak_5025	Chr2	12172380	12173633	AT2G28470	4.34542	5.01395	6.64463	6.82553	6.72065	7.09686	8.40377	7.68806	8.14291	7.20042	4.71114	5.89089	4.90384	5.13585	5.8555	5.25121	5.41244	4.64036	4.69541	6.15437	6.61841	4.95758	4.58268	4.38606	3.14207	3.49731	4.04917
Peak_5069	Chr2	12612259	12612980	AT2G29390	2.57497	3.20562	4.0776	3.03259	2.87549	4.33259	5.0748	5.64398	5.0452	4.23014	1.96936	3.55167	3.58355	3.1874	2.93924	2.5818	4.517	3.10089	2.91875	2.3177	3.64047	1.99896	2.57952	2.4839	2.3951	2.386	2.77759
Peak_5074	Chr2	12634448	12635489	AT2G29510	6.6493	8.17162	8.40194	9.85485	9.19701	10.6515	11.1926	8.9241	9.18439	5.94414	8.47765	7.23614	7.48224	7.62736	6.58462	6.34326	6.58935	5.91101	5.51663	6.50101	4.94398	7.75042	7.22194	7.4286	4.50543	6.27858	5.07492
Peak_5083	Chr2	12671060	12671722	AT2G29640	4.14046	4.94376	5.42475	5.08261	3.14378	4.94624	4.12559	3.97435	2.63304	2.1818	2.5289	2.4818	1.26445	2.03304	1.75784	2.37271	2.638	2.23883	2.95039	3.32477	3.47352	3.29254	4.0636	2.73717	3.39914	3.33716	2.73469
Peak_5084	Chr2	12674830	12676139	AT2G29650	3.19974	8.06711	11.3948	11.2631	6.36685	7.3456	11.4601	12.3811	12.612	12.1013	3.42937	8.06962	7.33557	8.49499	8.32183	5.17103	6.13723	5.15849	4.22366	10.0371	11.1702	2.75178	3.93506	2.9927	5.04179	3.58371	4.03167
Peak_5095	Chr2	12752191	12753169	AT2G29910	5.59627	4.48642	4.85413	6.81862	5.39814	7.14603	6.54661	7.07048	7.89824	5.04386	5.65503	4.62578	5.30747	4.34538	4.8726	4.53847	6.11678	3.79801	4.22113	3.61331	4.45283	7.36431	7.48352	6.30483	6.46098	5.41661	4.96662
Peak_5102	Chr2	12814219	12816096	AT2G30020	5.39789	7.99049	9.6159	12.114	9.22027	9.59664	9.82072	11.4383	9.90999	7.17122	7.0977	6.4281	7.43469	7.58611	6.80885	6.98041	7.36554	7.06532	5.50117	4.48147	5.73138	4.82108	5.13356	5.08892	6.48587	5.3305	6.8745
Peak_5123	Chr2	12928984	12929834	AT2G30330	6.87842	6.54425	6.46312	7.69935	8.38119	10.3089	10.3707	9.74491	9.99987	7.78626	10.4615	8.02192	6.59254	8.2595	7.95238	7.09282	6.46699	6.1502	5.38143	6.53072	8.11656	7.09669	7.47528	7.50425	5.5205	7.75922	6.50175
Peak_5132	Chr2	12994265	12995893	AT2G30490	7.77596	8.64578	10.7114	11.5217	10.7437	9.90511	8.85164	7.71541	7.93438	7.83549	7.30471	7.68211	5.28656	5.66799	5.20079	8.03227	7.48736	7.82036	6.52873	6.83751	5.59534	7.60744	7.45911	7.00603	6.78403	7.22803	6.02924
Peak_5133	Chr2	12999341	13000472	AT2G30500	2.94633	3.76097	4.05139	2.68495	3.71885	3.67819	3.08283	2.69947	2.69221	2.36984	1.45356	1.9255	2.07361	2.21301	2.33354	2.4439	2.94924	2.01989	1.48115	1.55521	1.63362	1.74834	1.29093	1.48115	2.39888	1.55521	2.55136
Peak_5134	Chr2	13003288	13005719	AT2G30520	8.68667	10.2561	11.1104	10.6921	11.0131	11.228	8.6718	9.13479	8.83468	7.8134	6.22098	7.08883	4.19734	3.97361	4.06148	5.20511	5.36935	5.08006	4.71913	7.272	7.96548	8.90971	8.36967	9.20373	9.5829	9.18143	9.10369
Peak_5165	Chr2	13189299	13190386	AT2G30990	2.82375	3.13347	3.904	4.44941	4.16386	3.99767	4.88	4.70021	4.2817	4.46754	3.21052	2.94764	3.18484	3.79371	4.10947	3.15916	2.99901	2.84944	3.34348	2.79202	2.52914	3.66227	2.65907	3.07002	2.29647	3.0111	2.42338
Peak_5175	Chr2	13277797	13278605	AT2G31160	2.57845	2.74303	3.01734	3.45013	3.9967	3.87479	1.9506	1.69459	2.12737	2.88526	2.44435	2.27164	2.27977	2.57032	1.87745	3.72646	4.14503	3.67973	2.59674	3.38917	2.27976	3.9967	4.24866	4.39901	3.93778	2.69833	4.10236
Peak_5178	Chr2	13293958	13294774	AT2G31200	4.45654	4.7865	5.52289	5.56313	6.76227	6.51479	6.45041	6.16874	5.58727	3.00389	4.80058	3.89519	2.96566	4.73218	3.13668	4.95953	4.54305	3.95958	4.46861	3.71412	3.46061	4.38612	4.0803	4.05615	4.02798	4.31168	3.92537
Peak_5182	Chr2	13329021	13329703	AT2G31270	2.56556	2.70034	3.37422	1.92056	2.44041	2.25028	1.2178	1.89649	2.37543	2.21899	1.84114	1.55715	2.07941	2.43319	2.49817	2.49095	1.85077	2.67868	2.93379	2.48373	3.39347	2.34414	2.6161	3.77374	2.81586	2.31045	2.15883
Peak_5186	Chr2	13350333	13350878	AT2G31305	3.29661	3.94991	3.49531	3.73616	5.61778	4.78384	3.73315	4.04023	4.38946	5.65993	4.12753	3.8626	5.22038	3.38994	2.96243	3.12802	2.92932	3.13705	3.04673	3.63379	3.22134	4.88019	4.08539	3.36886	4.83201	5.36489	4.83201
Peak_5192	Chr2	13381811	13383522	AT2G31380	8.46378	7.79936	7.68798	7.4585	10.1469	10.0893	5.71678	7.24727	6.28422	3.34711	1.41431	2.50313	0.902548	1.09842	1.10034	2.04994	1.2242	2.61739	1.76285	3.74365	4.84783	4.00962	3.99329	3.47673	7.36536	10.3745	8.29863
Peak_5201	Chr2	13436463	13437729	AT2G31560	9.59158	8.00488	7.97374	9.09079	11.1549	9.02851	6.98772	7.73242	7.04999	5.24533	8.42133	8.05677	4.99494	5.96797	6.02117	8.46415	9.31653	7.29131	8.36035	6.51417	5.64363	9.40476	10.2909	8.95716	8.76254	8.20467	9.02721
Peak_5203	Chr2	13445362	13446583	AT2G31580	2.81274	3.08715	3.15575	3.34407	4.10274	3.92384	2.67553	4.09064	4.15924	3.49339	3.93594	3.41537	3.04948	3.91039	3.48531	3.15575	2.37421	3.06159	2.94994	4.20767	3.4046	2.88134	3.0441	2.28947	3.08715	1.44067	2.92304
Peak_5213	Chr2	13497234	13498455	AT2G31750	6.04651	6.37607	6.49848	5.41697	7.202	6.77424	5.00804	6.1743	5.89584	4.19287	6.37741	4.98382	3.24722	3.37098	3.07639	6.22541	5.39545	5.55821	5.06857	5.23537	6.12587	4.68655	5.99405	6.40163	6.89664	5.7425	6.08551
Peak_5216	Chr2	13522725	13523842	AT2G31800	6.37373	7.81167	8.67327	8.71149	10.1715	9.70982	11.064	12.0799	11.4565	8.48359	8.29686	8.17483	10.0553	10.4832	9.24373	8.4042	8.73943	9.107	6.35314	6.39136	8.15572	7.34853	8.241	8.79236	5.79296	5.47391	4.79904
Peak_5218	Chr2	13529733	13530746	AT2G31820	5.68842	6.08721	6.32875	7.7391	10.1464	8.29027	6.99988	7.27547	7.71154	4.85841	7.22035	6.31416	5.20857	5.53765	5.81162	6.44871	6.34496	5.12103	6.24769	5.65923	5.42418	6.78752	7.53646	8.00982	5.72408	7.11984	6.30281
Peak_5221	Chr2	13554812	13556809	AT2G31880	7.44395	9.81831	10.5324	9.62415	11.9491	10.7998	12.6378	11.9697	11.2975	8.34975	8.15065	8.873	8.75207	9.95569	9.2243	9.86685	10.8771	10.6081	7.19712	7.26376	7.23415	6.84089	6.91823	7.06303	8.29381	7.8043	6.94866
Peak_5237	Chr2	13655981	13657160	AT2G32140	2.48658	2.54091	2.6816	3.88519	4.27663	4.57474	5.09157	4.76838	5.55545	2.63285	1.5003	2.38349	2.30827	2.57434	2.49494	2.34449	2.18011	2.40439	1.06568	1.64936	1.63404	1.29971	1.06568	1.57274	1.43344	1.13672	1.882
Peak_5238	Chr2	13659138	13660182	AT2G32150	1.80266	2.10153	2.82354	3.58173	1.57929	2.96826	4.2943	4.72373	4.24239	2.23838	0.802231	1.45188	2.3076	1.81839	1.713	1.36379	1.6957	1.54941	0.641785	1.89704	2.00558	0.284714	0.722009	0.401116	1.25368	1.12942	1.60604
Peak_5244	Chr2	13689783	13691265	AT2G32240	3.60237	2.67573	2.883	4.58	6.32021	5.64519	3.95706	3.79302	4.22862	1.74022	3.90053	3.4361	2.81096	3.23326	2.72006	2.54383	2.55048	2.43742	4.12665	2.70122	1.99959	4.16434	4.7784	4.4093	3.59128	3.16565	3.89056
Peak_5248	Chr2	13718996	13719774	AT2G32295	3.26437	3.28336	3.76658	4.00502	4.28355	3.86364	5.20357	3.66951	4.19704	3.2517	4.30466	4.87439	2.96473	3.12088	3.3551	2.84867	3.21161	2.5828	3.16308	3.33611	2.58279	4.08943	3.44373	3.44162	3.23904	3.35299	2.74105
Peak_5257	Chr2	13778287	13779501	AT2G32450	9.89791	10.8815	8.85752	10.6055	10.362	10.5284	10.04	9.33374	9.07939	7.36119	8.44082	8.32582	8.50306	9.92225	9.0821	8.13642	7.21508	7.72243	7.75218	9.79779	9.37703	11.8258	11.4578	10.3417	7.98894	11.1778	8.71952
Peak_5263	Chr2	13814558	13816165	AT2G32540	5.879	7.34083	9.10217	6.20408	7.65465	6.17954	5.6357	4.91297	5.3188	2.81529	4.4417	3.18024	1.56405	1.19808	1.929	3.81302	4.89457	3.86924	3.63719	2.85516	2.70489	7.23758	7.05255	6.23781	5.15319	5.34538	5.36173
Peak_5288	Chr2	13967978	13968818	AT2G32930	2.56048	3.88763	3.8114	4.21991	4.61277	4.71441	3.95213	3.53972	4.10263	2.56439	2.4217	3.80358	3.78795	2.31029	2.04838	3.3169	3.01589	2.55266	3.20939	2.40411	2.63866	3.41462	3.82508	3.1273	3.92672	3.1918	3.48694
Peak_5290	Chr2	13987795	13988600	AT2G32960	4.57854	3.75257	3.01633	3.48948	5.81036	4.58466	2.60029	2.37391	2.9633	1.12169	3.06732	1.76819	2.1924	2.11082	3.01429	3.17133	2.74713	2.61864	3.63836	2.99798	1.76819	5.70635	5.47998	5.50445	6.37529	4.51532	3.73421
Peak_5303	Chr2	14096776	14098247	AT2G33240	7.75775	7.41715	8.21336	8.83983	8.97718	7.19157	7.06204	5.3881	6.67007	6.57403	7.28649	6.20776	6.31496	6.6455	6.21111	5.69408	5.33226	6.14299	6.77727	5.58463	5.20496	7.04752	8.75161	7.09331	6.4914	7.01737	7.19045
Peak_5306	Chr2	14115159	14116120	AT2G33310	6.99379	7.18004	6.64521	8.30609	6.78703	8.80845	6.97158	6.94253	7.37996	4.56057	7.12023	5.8592	5.96514	7.04163	6.00786	5.60973	6.01299	5.22868	6.53585	4.69043	4.53152	5.84553	6.71527	7.32358	6.06424	7.02455	6.36156
Peak_5310	Chr2	14139820	14140742	AT2G33360	5.8521	7.06491	9.03817	9.49765	10.2047	7.60986	8.06044	8.22785	6.89394	4.90465	8.68376	5.97676	5.30358	5.94471	5.71497	6.01951	5.8058	6.40597	6.44871	4.97945	4.61614	6.77106	7.05422	7.48699	6.01594	6.75503	5.94827
Peak_5312	Chr2	14145270	14146493	AT2G33380	1.84926	2.60267	3.68778	4.10276	3.65555	5.01866	3.63003	4.04904	3.21506	1.66259	2.09771	1.94058	1.10929	0.932017	0.690283	1.98624	1.32551	1.68005	1.50681	2.25752	1.68811	1.5753	1.60216	2.09637	2.17023	2.15277	1.64379
Peak_5323	Chr2	14199653	14200648	AT2G33530	4.08967	5.31591	5.40008	5.75821	6.5537	6.38206	4.14743	5.14757	4.29266	2.52179	3.91967	3.70347	2.7281	2.9806	2.39306	4.0253	3.96094	3.77279	5.20863	3.6193	3.50378	6.58176	6.02227	8.15953	4.95612	4.92311	4.53362
Peak_5326	Chr2	14217190	14218461	AT2G33570	6.55836	7.14118	8.50325	8.19698	7.64646	8.37014	8.18535	8.7785	7.23551	6.5506	8.20085	8.52133	6.82069	7.05459	6.90598	6.06341	7.56505	6.38002	5.91738	5.62274	6.23786	6.12156	7.44745	6.19522	6.02205	6.58808	6.433
Peak_5327	Chr2	14220133	14221997	AT2G33580	6.38654	10.0408	10.5837	9.4	10.4136	10.1994	11.4625	9.94206	10.7882	7.68306	8.31589	8.05059	9.19288	11.1548	11.02	10.2179	9.56835	9.56306	7.72272	6.84045	6.87747	7.46624	5.97052	6.38742	8.07615	5.47606	7.6857
Peak_5328	Chr2	14223348	14224158	AT2G33585	5.36917	5.62658	6.42517	5.87183	6.27112	7.76492	6.61975	7.45076	6.20221	5.57591	4.44492	4.54829	5.44619	5.59618	5.98331	4.57261	4.9719	5.08541	3.30784	3.83483	5.50699	5.36512	6.02993	6.35625	4.8584	4.91718	5.85359
Peak_5334	Chr2	14253365	14254498	AT2G33700	5.13865	5.63005	6.94334	6.67662	8.67845	7.89569	6.64328	7.02307	6.52152	5.91126	5.97069	7.46807	6.41715	5.2807	5.40102	4.58492	6.24031	5.09227	5.25751	5.75181	5.55757	6.92015	7.78263	6.50268	6.8839	5.84023	6.75924
Peak_5353	Chr2	14389527	14390275	AT2G34070	4.44196	3.93719	6.02869	5.61829	5.5327	3.70895	2.79817	2.62699	2.98033	1.6789	3.57068	3.29416	1.91154	1.87423	3.62994	3.37097	3.70456	4.70971	4.02936	2.57432	1.65476	4.55169	3.5246	3.90427	4.90503	4.97526	4.16763
Peak_5354	Chr2	14393463	14394059	AT2G34080	2.85529	2.33214	2.33765	2.76443	2.96818	2.34591	1.96594	2.08709	1.68509	1.45656	1.15093	1.19773	1.05731	0.421272	0.162451	1.54467	2.30186	1.96594	1.44004	1.0463	1.52814	1.75943	1.10412	1.73741	2.63777	3.29033	3.00948
Peak_5362	Chr2	14479246	14479992	AT2G34310	5.14042	5.4881	6.61036	6.3419	8.0583	7.01746	6.06023	7.2001	6.7754	5.948	5.04799	5.54971	4.16559	6.19006	5.18882	5.63553	5.36487	4.26461	4.2536	4.46705	5.35386	4.38344	6.73579	5.61793	5.32746	5.71035	5.69934
Peak_5363	Chr2	14488982	14489598	AT2G34340	4.44116	2.30717	1.35606	5.6054	3.24761	3.74848	2.24323	1.07899	1.8809	2.03808	2.75208	3.53268	1.79032	2.54161	3.2636	3.43144	3.21298	4.55572	5.54412	3.46874	2.72544	3.98292	5.12851	5.8212	4.64363	3.55666	6.47391
Peak_5369	Chr2	14521795	14523640	AT2G34410	2.49774	4.22345	6.46919	7.50391	5.10856	5.7862	6.49412	5.87169	6.85743	10.0337	0.635788	4.67758	5.74525	5.42557	4.56182	3.59212	3.81473	3.44252	1.40782	6.53241	8.18866	1.27158	0.635788	1.31699	1.91538	1.63488	2.27156
Peak_5371	Chr2	14529160	14530506	AT2G34450	4.60554	6.34695	7.90288	7.46844	6.62396	5.71238	7.29637	6.77651	6.93759	5.29502	4.17354	4.87157	4.50181	3.97462	3.71591	4.13937	4.16988	3.77205	3.42303	4.01611	4.82886	4.381	4.79103	4.80689	3.95266	5.54275	5.48661
Peak_5377	Chr2	14560087	14561050	AT2G34560	2.69588	4.60909	5.97493	5.62367	6.57174	6.43533	5.26558	7.20096	6.47284	3.77867	3.87757	4.16574	3.4581	5.42586	4.51189	3.20743	5.11041	3.17845	3.27223	2.52025	4.01398	3.30463	4.35843	4.33285	3.21766	2.97724	2.28834
Peak_5381	Chr2	14573222	14573814	AT2G34600	2.25363	2.61398	2.44767	4.28272	3.36796	3.39845	4.19402	2.85238	4.948	1.27234	1.69646	0.565485	2.4643	1.83783	2.10117	1.90158	2.01801	1.96257	1.20859	1.33887	1.15592	0.424114	0.493414	0.507274	2.12889	1.01455	1.27234
Peak_5388	Chr2	14628328	14629189	AT2G34680	3.1007	3.27423	3.57171	4.87607	3.22083	4.19528	4.74067	3.80436	4.22198	3.10642	3.17697	3.81389	3.39246	3.36957	2.59535	2.87949	2.03281	3.16172	3.33525	3.59269	2.83182	3.07591	2.72694	2.98056	2.89284	2.52861	3.1846
Peak_5390	Chr2	14643320	14644350	AT2G34710	5.74768	6.33441	7.78209	6.87968	6.64849	7.1555	6.97534	5.88958	6.45557	4.85643	5.53403	5.78754	3.7069	4.97282	4.77033	3.98272	5.2056	3.64631	5.59302	4.45784	4.1278	5.89915	7.82514	6.48906	4.78468	6.83504	6.66922
Peak_5391	Chr2	14651012	14651734	AT2G34720	3.82641	4.22656	4.52212	6.1932	7.11399	5.27922	6.46602	7.87109	6.57742	4.2834	3.24665	3.88098	4.64262	3.49447	4.23793	2.3054	3.24665	3.1307	3.94009	3.57859	5.37471	4.97229	6.43874	5.45429	5.32924	4.17427	2.93972
Peak_5404	Chr2	14737904	14739942	AT2G34930	1.52125	2.87643	3.65761	4.12681	4.2832	4.52908	6.35829	6.39215	5.51987	0.493378	0.575608	0.616723	0.877117	0.736843	0.657838	1.39791	1.04964	0.72072	0.320051	0.493378	0.523207	0.370034	0.452264	0.534493	1.56236	0.493379	0.935967
Peak_5428	Chr2	14894306	14895132	AT2G35382	4.08065	4.45035	4.83397	5.45611	6.51751	6.64472	4.57558	5.71649	5.16988	3.82822	4.74055	4.15618	5.07647	5.8914	6.25315	2.70917	3.96139	2.72507	3.96735	3.14844	3.69902	3.94748	5.19175	4.55173	3.34522	3.04111	2.37723
Peak_5447	Chr2	14988366	14989315	AT2G35660	6.35368	7.53547	8.55808	5.96609	7.01984	7.04406	8.40063	8.03726	7.84173	6.11489	6.37098	6.48518	3.84474	5.28781	6.05087	5.73596	5.46949	5.73596	3.97105	5.37086	5.38297	6.27581	6.589	6.62706	6.7949	6.43154	5.91245
Peak_5448	Chr2	14990416	14990931	AT2G35658	2.49435	2.66001	2.56125	2.3287	3.93426	4.28787	3.57747	3.67304	4.09354	2.19172	3.29076	2.47842	3.7049	2.01969	3.59977	1.54822	4.21141	1.71069	2.91804	1.46221	1.43991	1.9528	1.13727	1.79033	2.20446	3.43093	2.59948
Peak_5452	Chr2	15013183	15014178	AT2G35710	2.75285	3.00041	3.37835	3.49718	4.68876	3.93288	2.99051	3.17205	2.42937	0.995185	1.32691	1.03809	1.16353	1.03149	1.57612	1.09421	1.95736	1.09421	2.10425	2.02008	2.16036	2.77761	1.60418	2.10425	2.77761	1.34672	2.29404
Peak_5459	Chr2	15042105	15042715	AT2G35790	3.44093	3.43017	3.29296	3.56737	3.44361	3.43016	4.80223	4.7565	5.38334	4.23457	4.84258	4.33142	3.80681	4.48208	4.36909	2.60693	3.38712	4.19422	2.68494	3.22301	3.01585	3.98706	3.79067	2.79525	4.00589	2.88672	4.34218
Peak_5463	Chr2	15053530	15054511	AT2G35840	3.48845	4.97321	5.01004	4.8845	6.14998	5.66956	5.04687	5.9307	5.15567	5.4938	5.46702	3.90525	3.50017	4.61834	5.23099	3.66421	3.48343	4.10947	4.39069	3.07331	3.18379	4.58319	4.36558	4.09441	2.90257	4.09775	3.15868
Peak_5468	Chr2	15083143	15084407	AT2G35930	4.12312	4.03216	3.61374	4.63899	4.93266	3.94379	3.86973	3.90871	3.84503	1.8387	2.21684	2.58458	3.20311	3.26938	2.74831	3.74888	2.65475	3.4682	4.17379	1.78932	0.596442	1.97645	1.58791	2.30001	3.95029	3.4786	3.84893
Peak_5487	Chr2	15210233	15210888	AT2G36290	1.99961	2.67116	3.79374	4.50789	5.12932	3.68599	5.90361	5.19948	4.85619	5.18946	3.20489	4.34752	2.34791	3.68098	3.57073	3.96915	2.06977	3.30762	3.30261	3.05203	3.15477	2.4281	3.22243	3.19737	3.45045	2.61603	2.55589
Peak_5489	Chr2	15226047	15226919	AT2G36310	3.89764	4.76002	4.70542	5.34749	6.64105	5.6883	6.3944	6.1515	6.49042	5.90483	6.04793	6.08371	6.64671	5.99898	6.08559	5.65629	4.51336	3.76584	3.43068	3.92588	4.43051	4.85982	5.99333	4.94078	3.36101	4.14807	4.89747
Peak_5511	Chr2	15353831	15355309	AT2G36630	4.47013	6.33398	7.17421	6.67518	5.44706	6.59293	7.00528	7.06974	6.33175	4.00777	5.37371	4.76132	2.27508	3.61433	3.61544	3.5521	3.78661	3.11531	4.55126	3.62767	3.5143	5.01695	4.73687	4.45012	4.32675	4.70464	5.35926
Peak_5533	Chr2	15515052	15516583	AT2G36950	8.0816	8.66208	8.48719	9.33698	8.49684	8.90349	9.47754	10.1342	9.03869	7.82731	7.95928	7.64061	7.51722	8.38739	7.32623	7.7801	8.88311	8.4389	7.20498	7.48932	8.14169	7.52581	7.12881	7.49362	9.24255	8.96788	9.35736
Peak_5535	Chr2	15528935	15529739	AT2G36970	4.47805	2.39524	2.49938	3.75927	5.23358	4.85581	2.18695	2.08281	2.08281	2.57697	2.84855	2.76075	1.70301	1.66625	1.77039	1.54782	2.58105	2.18491	3.16097	3.37334	2.46058	3.77561	6.00953	4.25752	4.88236	3.91038	6.33216
Peak_5544	Chr2	15592486	15593465	AT2G37110	8.37326	8.5477	8.66512	9.48366	11.8822	11.265	11.0872	10.3425	9.82918	7.77445	11.5921	10.2754	9.89125	10.0942	9.38636	7.69897	8.56112	7.15048	9.06599	7.82309	7.51614	9.10122	9.10626	8.7255	7.26957	8.00089	6.73282
Peak_5574	Chr2	15774740	15775416	AT2G37600	3.31186	4.51617	5.73505	5.64036	5.1596	5.57722	5.09647	5.86131	4.97507	3.46725	4.33406	4.05484	3.68335	5.33199	4.0864	3.13461	4.21024	2.84324	3.21231	3.36042	3.40898	4.04999	5.32471	3.78776	3.11518	3.35071	3.93344
Peak_5595	Chr2	15890926	15891873	AT2G37970	6.27865	8.89172	9.81592	8.32992	7.85828	9.4119	8.46517	7.86695	7.51669	4.31061	4.15629	4.86374	4.74063	5.55559	4.66433	5.58507	5.70124	6.75375	3.97942	3.64824	4.24819	4.86548	6.00642	4.86548	6.07924	4.40945	6.09311
Peak_5612	Chr2	16007188	16007617	AT2G38210	2.37011	3.10409	2.79062	3.51312	2.59566	2.87854	3.1232	3.01616	3.66985	1.747	1.26151	1.46794	1.11625	1.76229	2.24778	1.63997	1.1583	2.19044	1.71642	1.55969	1.3609	3.11173	0.462555	2.14457	2.87854	2.39687	2.9053
Peak_5618	Chr2	16049937	16051192	AT2G38310	8.75291	8.01347	6.37623	7.14577	11.3207	8.57361	5.41037	5.69699	5.22321	5.67735	7.76742	6.20739	5.25463	4.81619	4.27175	7.7491	5.40644	8.10901	9.05654	8.32364	7.60383	9.06701	10.3875	11.3835	11.5157	12.0143	10.2789
Peak_5626	Chr2	16101933	16102661	AT2G38450	3.99335	5.11852	5.04636	5.60331	6.59995	6.37672	7.94611	8.61129	8.7601	4.39922	7.02387	5.05087	5.63714	7.00583	4.27971	5.77243	5.80851	6.15575	3.90315	6.14447	4.56608	4.37442	5.28312	5.55145	3.66639	4.52775	3.90991
Peak_5629	Chr2	16108345	16110683	AT2G38470	4.19135	6.91811	7.22311	7.61456	9.7032	9.06719	9.01378	9.68774	9.11357	5.18366	3.99175	4.00511	5.17453	5.11198	5.7515	4.73037	5.08598	4.90818	4.86319	3.76335	3.01068	3.99668	3.40494	4.17167	5.20545	2.54475	4.22086
Peak_5651	Chr2	16216960	16217755	AT2G38800	2.5297	3.61592	4.86322	4.94376	3.49615	3.63451	5.54676	4.89007	5.41046	4.63399	3.28138	3.70059	4.08056	4.02274	3.58081	3.17193	2.52764	2.317	3.49202	3.97731	3.22356	3.58082	2.94891	2.86011	2.84772	2.80642	2.9076
Peak_5655	Chr2	16234269	16235223	AT2G38860	7.63372	5.23775	4.29451	5.16201	4.983	5.77822	5.43741	5.8333	5.00366	5.5097	5.23258	5.22742	5.00022	4.46491	3.72477	4.56474	4.20156	4.94686	4.57851	4.80227	4.20156	4.5045	4.70416	4.50966	5.97616	5.23947	5.33413
Peak_5664	Chr2	16295238	16296149	AT2G39020	6.3841	7.88009	9.03363	8.95613	8.95252	8.95252	9.46801	10.1745	9.60138	7.5863	9.06607	10.6522	7.87829	9.05886	9.31119	7.70526	7.24024	7.93417	7.8152	8.73983	8.47848	7.68003	10.5783	7.53584	5.69919	7.16995	7.8134
Peak_5671	Chr2	16335601	16336335	AT2G39170	5.80134	5.07897	4.68312	8.27486	8.30169	7.05375	8.44035	9.82695	8.78252	7.57037	8.05791	8.10935	7.20583	6.80998	6.07195	5.08121	6.16365	5.16396	7.27516	4.63392	5.20645	8.84068	8.43364	7.94163	5.13041	7.00679	6.15917
Peak_5687	Chr2	16460357	16461511	AT2G39420	2.49059	1.97112	2.23726	3.05844	3.27761	3.98921	4.53287	4.30089	4.39482	1.75622	1.49293	1.77045	2.75815	2.09209	1.57547	2.307	2.5404	3.28615	2.12198	1.77757	1.58828	1.35773	0.824029	1.03039	1.89854	1.73772	2.09494
Peak_5691	Chr2	16472984	16473899	AT2G39450	5.37462	6.83895	8.14357	8.53299	8.43608	7.89413	8.27996	8.16331	8.01257	6.18035	4.45222	5.1808	4.53298	5.511	4.86855	4.92778	4.75909	4.86497	4.58861	2.98071	4.61912	6.45492	5.5774	7.38449	4.32481	4.39301	5.61149
Peak_5697	Chr2	16504979	16506098	AT2G39560	5.35699	9.1333	9.32703	7.73021	6.87896	6.85988	7.40145	7.6128	7.10791	5.85599	6.53259	4.78606	4.49107	4.19166	3.9084	4.62756	5.92645	5.16473	5.58594	5.61383	3.55616	6.17595	5.88975	5.61383	5.63878	4.51015	6.58689
Peak_5702	Chr2	16531635	16533016	AT2G39660	5.03604	5.32507	5.35123	6.1874	9.83775	7.60995	7.65991	6.82613	7.5826	5.27749	7.8859	7.48982	5.50586	6.27304	5.88647	6.36938	5.33815	4.67088	5.72352	5.29652	4.01669	6.54304	8.08811	6.15291	5.47374	6.6382	5.90312
Peak_5745	Chr2	16772040	16774046	AT2G40140	5.63655	6.96993	7.50639	7.98143	9.29432	10.1142	7.74063	8.75459	8.22713	6.79137	6.4695	6.50144	5.99692	7.24675	6.52765	7.13373	6.84216	7.25741	5.105	5.1566	3.59225	5.73483	6.3491	6.73077	6.64149	4.67829	6.52028
Peak_5746	Chr2	16775393	16776133	AT2G40150	3.81776	3.85991	3.5804	6.919	4.99791	3.76452	3.28536	3.83994	3.35413	4.00632	1.9233	2.43352	2.9393	3.62033	2.82838	2.75518	4.58309	2.90602	3.2787	2.54665	2.91268	4.25256	3.59371	3.39406	4.06399	4.82932	3.08793
Peak_5753	Chr2	16822983	16824579	AT2G40270	6.20255	6.92615	8.13866	8.07587	10.4772	9.73509	9.67746	11.1216	11.4437	6.35179	6.92923	7.82163	5.7898	8.06557	6.66676	7.764	7.31419	7.764	5.7126	4.55052	4.40951	6.69558	7.02908	7.6765	5.99669	5.37705	5.35235
Peak_5756	Chr2	16832528	16833403	AT2G40300	6.34623	4.7456	4.74935	6.15858	8.38032	8.11761	6.91104	5.46053	6.34059	4.75498	5.79829	6.30682	4.31213	4.72308	5.36295	4.51104	5.59751	4.25584	4.06819	5.60689	5.58062	4.74184	4.6893	4.14513	4.5692	5.68383	6.16983
Peak_5758	Chr2	16844945	16845914	AT2G40330	4.65853	2.79614	1.7031	1.38282	3.17065	3.81122	1.55567	1.55567	1.46924	1.47771	3.01982	1.64209	0.701576	0.604982	0.701575	1.12354	0.691408	0.604982	3.10795	1.81495	2.05897	2.01661	2.35892	2.35723	3.62989	5.15506	4.18234
Peak_5763	Chr2	16869263	16870420	AT2G40400	8.32541	9.46527	10.2176	10.7371	8.35805	10.6576	11.9437	11.3163	11.0693	10.7911	7.07198	9.74775	7.60146	6.64329	8.62918	6.82925	7.9535	7.31188	6.56805	9.51495	9.55611	7.15148	7.4368	6.82357	8.10538	8.83217	7.16709
Peak_5772	Chr2	16922637	16923407	AT2G40520	1.40074	1.96359	1.82927	3.32809	2.5371	2.16826	2.36015	2.33456	2.27913	1.51373	2.15121	2.41345	1.12997	1.19606	1.52226	1.52226	1.22804	1.631	2.36867	1.49241	1.15342	0.978598	1.15129	0.466913	1.8975	2.2834	2.26207
Peak_5796	Chr2	17039483	17040259	AT2G40820	2.48367	2.79254	2.55983	4.4871	2.81369	3.6176	2.26576	2.57463	2.16421	1.51051	1.72629	1.5909	1.90612	1.57186	1.83419	2.73965	2.88139	2.44347	2.23191	2.44981	2.55136	2.64445	2.99352	3.13949	2.15787	2.1621	1.72629
Peak_5810	Chr2	17113413	17114884	AT2G41000	6.13964	7.57461	8.31498	9.00845	7.588	9.24742	9.56457	10.841	10.1542	5.52433	6.94813	5.04973	3.53214	4.19546	4.55727	6.16868	9.05089	7.53552	5.0006	3.71862	4.21444	7.00509	6.36522	6.37973	10.0805	6.43557	9.6271
Peak_5816	Chr2	17138021	17139673	AT2G41100	3.90512	6.21617	7.54671	6.82973	7.64615	7.32594	5.23765	5.50615	5.03478	2.47712	1.82577	2.02863	2.28221	2.07935	2.53579	2.78937	3.03997	2.43436	3.04295	2.14498	1.58711	1.85461	1.67362	1.55031	3.61474	2.20763	2.83014
Peak_5817	Chr2	17140158	17142506	AT2G41110	5.55347	5.65634	5.32464	6.14549	6.97123	6.69831	5.73892	5.21828	5.70042	3.50941	4.59057	3.79632	3.78792	4.36314	4.30156	4.59827	4.68574	4.66755	3.81311	3.07134	2.85371	5.7921	5.21898	4.87958	4.36874	4.74662	4.53109
Peak_5825	Chr2	17200983	17202722	AT2G41250	6.5043	10.4333	11.7569	10.764	11.0134	8.87079	7.21283	8.83584	7.48679	4.56954	2.88891	3.24979	2.00183	2.11992	2.00372	2.19266	2.21723	2.26446	1.7751	3.46896	3.9432	3.73726	3.77505	4.15104	8.12258	6.56287	7.7532
Peak_5835	Chr2	17269280	17270971	AT2G41430	5.94562	7.86337	6.77626	9.10982	7.72541	7.58163	6.24193	7.40094	6.444	4.29891	5.06252	4.92456	4.45921	3.63149	5.25196	4.9508	4.7905	3.96375	4.93428	5.34522	4.50099	5.09944	4.37664	6.23416	6.2429	5.78241	6.09426
Peak_5850	Chr2	17363815	17364441	AT2G41650	3.42653	4.01116	4.94448	5.81487	3.98756	3.92988	3.03065	3.2666	3.56547	3.57072	2.05015	3.41079	2.5404	2.49321	1.95839	2.06326	1.8745	1.49435	3.19844	2.29134	2.07899	2.08947	2.27299	3.20893	2.90219	3.37147	2.50107
Peak_5883	Chr2	17582629	17583949	AT2G42190	4.52198	6.23545	6.91735	6.98828	7.30559	6.83522	8.88467	8.4927	8.21894	6.53533	7.16995	6.85015	7.68761	7.19608	6.98579	4.92266	6.53658	5.62074	4.70489	5.93555	5.3308	6.06622	6.74812	6.67719	2.85579	5.06451	3.46303
Peak_5886	Chr2	17591955	17593272	AT2G42220	5.02491	7.20249	8.36736	7.91962	9.07201	7.72256	6.75101	8.34117	8.07177	8.63425	3.81638	6.27957	4.38884	4.98873	4.7842	3.11671	4.75926	3.50833	2.13268	5.10472	6.26336	3.87999	4.26163	4.19802	4.61208	6.02265	4.61583
Peak_5896	Chr2	17633692	17634404	AT2G42330	3.7625	3.52735	3.90775	5.18266	4.74923	4.96595	5.87891	6.61435	6.08178	4.35039	4.75615	5.1573	3.7602	4.17979	4.11523	2.72735	3.17461	3.05703	4.05529	4.68007	4.6524	6.0011	6.20398	4.51639	4.78381	4.8184	4.62935
Peak_5912	Chr2	17736508	17739104	AT2G42600	7.23343	8.29933	9.23864	7.69422	9.25002	9.31649	8.52846	8.65125	8.48984	5.45545	8.53478	7.85879	6.553	6.99986	5.78649	8.00564	7.29546	7.68283	6.79099	5.73142	5.60673	9.66399	10.7312	9.71336	7.82967	7.61827	8.52212
Peak_5957	Chr2	17989570	17990340	AT2G43280	4.09348	3.1959	3.29611	4.6009	4.31734	5.26822	4.54547	5.94408	4.15744	2.93579	2.96564	3.31103	3.47946	2.96564	2.71406	2.78016	1.23444	2.49873	3.63296	2.58614	2.69487	3.42403	3.62444	3.85896	3.6884	3.02534	2.67142
Peak_5960	Chr2	17999143	17999938	AT2G43320	4.41717	4.5452	4.01654	4.82811	6.2592	5.00984	6.33561	5.7925	6.82296	3.31649	4.01861	3.79145	4.94995	3.46311	3.07074	4.09089	2.97988	3.89058	3.95872	3.14509	2.01343	3.46311	4.72693	3.89677	3.07694	3.4755	3.32475
Peak_5961	Chr2	18000753	18001756	AT2G43330	6.17894	7.36922	7.26935	9.21111	8.69865	10.2278	9.39121	8.80999	9.22584	6.32465	6.34594	6.51294	6.46546	7.03358	6.29846	5.58299	8.18293	5.83349	6.33939	5.0869	5.6894	7.84893	9.15872	8.60042	6.35904	7.47728	5.82038
Peak_5962	Chr2	18007585	18008910	AT2G43340	6.19582	6.1326	6.5045	7.38341	9.62099	8.76439	5.69004	5.50161	6.1797	4.17269	6.92473	4.93136	4.67848	4.69583	4.69583	5.92309	5.58591	5.98632	5.39995	4.62269	4.8136	6.74003	8.49415	7.75655	6.99787	6.96069	6.32226
Peak_5974	Chr2	18058227	18058830	AT2G43490	3.43726	2.02208	3.35017	3.88359	3.20049	4.45782	4.72725	5.42668	4.1258	4.2401	5.57364	3.02359	3.61144	3.46992	3.92713	2.77593	2.6698	2.44663	2.71062	2.68068	2.91473	3.50258	3.51346	3.03448	1.83429	2.76777	2.24524
Peak_5982	Chr2	18108219	18109498	AT2G43680	5.25756	4.32394	4.33036	5.32434	5.79692	5.56962	6.65221	7.00793	6.53149	5.25755	5.01484	4.42795	4.10819	5.49898	4.97759	3.33509	4.26615	3.99004	4.39328	4.89284	4.52812	5.92663	4.71562	5.09703	4.97759	3.65871	4.44593
Peak_6003	Chr2	18237160	18238065	AT2G44080	5.42668	3.96795	1.86151	3.87724	4.59753	5.67706	3.4926	2.55277	2.75235	2.49834	4.30905	4.43424	1.97944	2.40581	2.02843	2.49834	2.78501	3.19323	4.61023	2.46568	3.05353	5.64077	4.90778	4.7336	5.27427	5.50107	5.49199
Peak_6006	Chr2	18250110	18250929	AT2G44120	4.91333	5.32828	4.62867	5.38842	4.39212	6.0319	6.10407	6.5491	5.44455	2.76036	4.64671	3.98318	4.19166	3.04702	4.36205	3.80277	4.37809	3.18935	3.13322	3.1673	3.75866	7.03622	6.48695	6.01587	4.8612	5.01957	4.19567
Peak_6019	Chr2	18305345	18306278	AT2G44290	3.85956	2.87223	3.87188	4.28019	4.5477	4.48962	5.32207	5.17776	5.21823	4.21859	4.57409	5.74446	3.40901	4.9912	3.82788	4.6621	5.27456	5.12496	4.26786	3.09046	2.10665	3.17142	3.87892	2.46392	4.75361	3.79268	4.54066
Peak_6024	Chr2	18330413	18330969	AT2G44420	4.31458	3.87781	2.68259	3.88371	6.42169	4.98153	3.2256	3.91322	3.67713	5.0258	3.34955	3.70959	2.81539	2.81539	2.59406	4.14046	3.69484	3.80403	5.47437	3.65057	3.43513	5.41831	3.94568	3.9988	4.06373	5.01105	5.86983
Peak_6028	Chr2	18374286	18376184	AT2G44500	6.30335	7.53511	7.58445	8.37822	8.58942	9.48619	7.74546	8.84564	8.45179	6.40116	6.6998	7.46067	5.56239	6.75433	5.69483	5.73898	5.45939	5.42996	5.85756	4.72968	4.78767	6.09647	5.64809	6.14062	6.35702	5.73465	6.24103
Peak_6052	Chr2	18501918	18502653	AT2G44860	3.80126	5.29988	7.7745	6.30715	6.02573	5.90066	5.923	5.55672	5.82026	4.32834	6.24014	5.36018	4.07374	5.24851	5.41601	4.94477	3.15581	5.19491	3.23397	3.40818	4.70802	4.30378	4.44895	4.50479	3.42828	4.61646	3.41711
Peak_6058	Chr2	18551400	18552175	AT2G44970	5.78715	6.01593	6.90984	7.26148	8.41594	6.83358	8.90527	8.9434	8.36298	7.18098	7.7042	7.8779	7.33562	5.85282	5.9439	5.47788	6.48831	5.72149	5.55202	5.61557	6.00745	6.85689	6.43535	6.44594	5.07752	4.79368	5.26605
Peak_6072	Chr2	18626210	18627484	AT2G45180	7.35902	7.23267	6.04914	7.46989	7.20946	8.60571	7.96496	8.72433	7.65554	9.02472	6.62543	8.20089	6.92712	6.78272	7.17207	5.42386	6.90649	5.78614	7.87342	6.17549	6.20514	8.08744	6.59192	8.33498	8.02684	8.52965	9.07629
Peak_6113	Chr2	18863150	18864765	AT2G45820	4.20204	6.27712	7.05527	6.45513	9.64301	9.51891	10.0692	9.05305	9.84442	5.1877	3.94265	4.25696	5.28027	4.87643	5.12463	4.62519	4.77574	4.67707	3.03429	4.27934	3.92027	4.35767	3.81957	4.70148	3.8389	3.52764	3.89077
Peak_6122	Chr2	18918451	18920090	AT2G45980	4.81109	5.2932	5.19097	5.87153	5.97176	7.46119	7.41208	6.36267	7.02719	6.90792	5.98078	6.44084	4.9023	6.12912	5.48965	4.70685	5.39744	4.96444	4.60361	4.29389	4.29389	5.28919	5.27215	5.7252	4.32497	5.00955	4.14054
Peak_6137	Chr2	18979375	18980622	AT2G46220	7.82775	7.83039	7.10596	8.22026	8.15176	9.61774	11.197	9.1225	11.3076	8.86697	9.64145	8.60091	8.63911	8.21762	9.05796	7.87254	9.0685	8.34144	7.32065	6.92024	7.07435	9.00133	8.95918	9.24631	7.05327	7.90283	7.52349
Peak_6142	Chr2	19000208	19000714	AT2G46270	2.08148	3.43348	2.99578	4.75629	4.77574	3.45617	4.20512	3.71879	5.10644	3.04441	1.96801	2.66832	1.33578	1.76051	1.15746	1.70215	2.47055	1.40711	3.09629	1.65676	1.82211	1.08937	0.969414	2.11066	2.14957	0.972656	1.85129
Peak_6152	Chr2	19043652	19044874	AT2G46400	2.82656	3.02952	3.98649	4.52143	3.88703	3.90853	5.92463	6.85069	5.17598	3.09403	1.23385	2.87898	2.5134	1.76744	2.0134	3.0564	2.74054	3.11419	2.66527	2.87898	2.4099	2.60479	1.34675	2.10749	3.508	2.14647	2.55775
Peak_6156	Chr2	19065573	19066235	AT2G46450	4.16278	3.87766	4.97599	6.34458	8.05282	6.2454	5.43715	4.74294	4.42558	2.31816	4.06608	2.89584	2.27354	3.54047	2.60328	2.90824	2.34048	3.23551	2.99502	2.40246	2.45948	4.11815	5.15203	3.20824	3.16113	4.26939	3.36196
Peak_6169	Chr2	19136012	19137201	AT2G46600	4.28076	4.91203	5.45351	5.70077	6.68428	5.57507	5.5281	5.81957	5.21177	5.86376	4.45066	4.98247	3.19779	3.29863	3.96857	5.07088	4.97833	5.04602	3.95476	4.28075	3.62738	5.45489	4.12052	4.31253	5.21316	4.09566	4.72002
Peak_6182	Chr2	19232560	19233823	AT2G46790	0.469468	4.48661	7.11355	5.34752	0.729561	2.03133	10.4609	10.9044	10.3738	6.31896	0.663237	2.58662	1.92339	1.52545	1.59177	1.13921	1.21984	1.32648	1.59177	5.05621	5.97304	0.397943	0.663238	0.53059	0.663237	0.663238	0.663237
Peak_6185	Chr2	19243446	19245149	AT2G46820	8.06942	10.5563	13.2902	11.8133	11.9647	11.0531	12.2908	13.6799	12.367	12.1625	10.5283	10.7058	11.1891	11.4564	11.7583	10.1251	10.8708	10.5776	6.46711	9.35242	9.19229	8.39066	9.59938	9.01962	7.27936	8.05592	7.20894
Peak_6186	Chr2	19245601	19247078	AT2G46830	6.87989	8.28568	8.98857	8.87179	10.3054	10.5367	7.8497	6.70083	6.87099	2.5135	0.397045	1.81506	1.07769	0.737369	0.79409	0.680649	0.453766	0.79409	0.680648	1.9285	2.1109	2.66587	2.60915	2.66587	5.83333	6.37608	6.43835
Peak_6198	Chr2	19333459	19335105	AT2G47060	5.7318	6.31566	7.99538	7.00831	10.7979	9.79286	9.38467	9.0114	8.2918	4.28463	4.14989	4.71578	6.03022	6.41347	6.55319	5.09205	5.03916	5.50425	3.36143	3.30853	3.86245	4.44332	4.49422	4.17684	3.46124	3.79459	3.91934
Peak_6199	Chr2	19336620	19338324	AT2G47070	4.67106	6.93284	8.88707	9.27753	10.7015	9.80874	7.56336	8.96998	8.97865	5.71807	5.58309	6.29363	8.02902	6.13649	6.16734	5.84533	7.06299	6.11721	4.87834	4.37604	4.13502	6.09696	5.27073	4.96607	4.37893	4.29217	5.21192
Peak_6214	Chr2	19439441	19440408	AT2G47370	3.98891	6.25421	7.76045	9.85594	6.91987	7.9778	7.76724	9.35329	9.14781	5.9825	5.78722	5.78043	4.60363	5.62929	5.19627	6.54119	5.89251	6.27968	4.67664	4.86853	6.38666	5.54439	6.22364	5.19627	6.61081	7.05233	6.56666
Peak_6215	Chr2	19440844	19441537	AT2G47380	4.75846	4.83426	5.99486	6.70069	5.46666	6.03985	5.8859	5.11138	6.50883	4.73951	5.97353	3.96972	4.5595	5.31744	4.46239	4.2279	3.42732	3.98394	4.24685	3.38232	3.58128	6.52542	4.15921	6.24119	3.61681	3.90341	3.6097
Peak_6224	Chr2	19487148	19488534	AT2G47490	13.4016	13.7298	13.3447	12.438	15.7517	13.6824	10.3747	11.7838	10.6615	7.01128	10.2787	9.10305	6.86907	6.10939	5.92688	6.64863	8.20709	6.77426	6.37249	8.11228	8.3813	10.9934	11.4899	11.7459	10.1033	12.316	9.59251
Peak_6253	Chr2	19625487	19626524	AT2G47960	3.11972	3.5758	4.53546	2.77132	4.54971	3.89093	3.87668	4.62573	5.08022	3.1308	5.54422	4.36443	3.55362	3.2084	3.12763	3.39685	3.36517	3.31133	2.98827	3.08329	2.90751	4.40402	3.91152	4.42619	4.0873	5.10556	4.72074
Peak_6259	Chr2	19644217	19645127	AT2G48020	4.72025	3.49689	3.10714	4.13924	4.34675	4.04361	3.48065	4.44418	3.86498	2.76972	3.00248	3.31284	1.95956	2.85272	2.51891	2.16886	3.61958	2.7607	3.00068	2.98444	3.84874	3.92452	3.77296	3.86317	4.77438	5.5647	7.06053
Peak_6269	Chr3	17804	18905	AT3G01060	6.46627	7.09723	9.15122	9.67628	9.28845	8.70223	8.79472	8.6724	8.63212	6.57068	4.56442	6.23804	3.17421	3.76192	3.92451	5.66227	3.93048	4.60917	3.65154	4.39437	5.32516	6.10678	4.97313	5.25953	6.84663	7.07336	7.37915
Peak_6278	Chr3	64808	66009	AT3G01180	8.24903	8.20253	7.74167	8.71263	10.8104	9.60563	10.2238	10.4303	10.1308	7.12901	7.07567	6.57105	6.36592	5.94745	5.07632	7.16047	5.64933	7.37107	6.16899	6.649	5.50983	8.49792	8.72494	9.08323	8.50886	8.92733	8.22988
Peak_6293	Chr3	171469	171985	AT3G01450	2.62625	2.73753	3.33845	3.47517	2.59127	3.01096	4.01568	3.86624	4.18419	2.7566	5.07444	3.9648	3.48153	3.80901	3.66911	1.79004	3.67865	2.10799	2.94101	2.85517	2.6485	3.28758	2.76614	2.77886	2.79794	3.69137	3.56737
Peak_6303	Chr3	217942	219098	AT3G01550	6.64477	7.60377	7.72027	8.84975	11.569	10.5688	8.39512	8.24452	9.0799	3.69533	2.79032	3.33304	2.53601	2.68092	2.31864	3.90702	4.70973	3.61719	2.15951	2.53175	3.55041	6.39898	6.14751	6.59363	5.21693	5.40873	6.30379
Peak_6319	Chr3	288559	289352	AT3G01810	5.20464	5.44479	6.54617	4.78438	7.64548	6.53168	6.49856	7.12171	6.16317	5.07214	4.52766	5.22327	5.11562	3.12817	4.11775	5.07007	4.9707	5.07007	4.21091	5.07835	2.9729	5.38475	4.73676	5.49034	3.48425	4.46349	4.11775
Peak_6321	Chr3	296063	297497	AT3G01830	2.31734	3.1295	3.30247	4.34373	4.31967	3.77212	2.87405	3.45597	3.37578	0.993146	0.701044	1.05157	2.15354	1.92787	2.04128	1.32763	2.04013	1.34367	1.05157	0.642624	0.408942	0.993146	0.642624	0.934726	1.92787	0.932435	2.51207
Peak_6338	Chr3	385245	386573	AT3G02140	6.87571	6.49847	4.35375	5.98023	7.4929	6.03959	2.08164	2.01856	1.51392	1.82932	5.92951	3.02412	2.5232	2.00495	1.62647	3.34324	3.0365	3.21708	5.08597	3.64998	2.4428	2.9561	4.94745	4.54176	8.41931	7.11443	7.1639
Peak_6345	Chr3	415304	416165	AT3G02230	4.48705	6.46646	6.8612	5.49773	5.86005	6.67431	5.93633	5.78949	7.67927	3.71092	4.27919	3.4039	4.01985	4.33068	3.50115	4.42793	3.78911	3.5946	4.57095	4.02938	3.31809	4.43937	4.86462	5.15448	4.44509	3.66134	4.5843
Peak_6348	Chr3	453373	454166	AT3G02280	4.61048	3.90659	4.11775	4.36411	5.34749	5.87333	6.32051	6.30188	5.17358	4.92101	5.952	4.14259	3.79893	3.52359	3.37867	4.30201	3.66644	4.01217	3.65608	4.19849	5.25225	5.81744	6.0431	5.21706	3.82791	5.59592	5.27917
Peak_6357	Chr3	486883	488859	AT3G02380	11.2355	12.0154	13.3391	12.7845	13.3191	13.8429	8.83921	7.56293	8.12748	3.17034	0.848085	1.69617	0.849748	0.890489	0.975297	0.89049	0.628581	1.06011	0.487233	3.18032	4.23377	3.04895	2.54426	2.87185	12.4244	12.2457	10.6443
Peak_6362	Chr3	508977	511231	AT3G02468	6.78874	7.84135	9.15711	11.5051	10.0216	11.0203	7.84426	8.54114	8.89176	6.39437	5.08736	5.68656	4.81182	5.83016	4.49837	5.68802	5.01884	6.08894	4.71195	5.3906	5.76237	4.30082	4.98166	4.37518	7.32379	5.56993	7.58402
Peak_6505	Chr3	1254296	1254987	AT3G04610	5.0929	4.80072	4.61544	4.34939	7.02173	4.83397	6.26635	5.02401	5.78176	5.8459	6.2996	5.23304	5.37795	5.81502	3.23294	4.81972	4.32801	5.44446	5.50384	2.9859	4.30425	4.90999	4.62969	4.35176	4.2995	4.47054	3.02866
Peak_6507	Chr3	1260299	1261622	AT3G04630	2.66805	4.3764	5.18216	6.18531	6.65337	4.81093	6.99604	7.50879	8.1221	3.91703	3.66997	3.60913	4.75631	4.07471	4.42234	5.69615	5.56207	5.45405	3.33103	3.02437	2.91263	2.91264	2.30925	2.91264	4.64209	2.22358	3.24412
Peak_6558	Chr3	1514408	1515606	AT3G05320	4.83814	4.19242	3.84282	4.41863	5.73475	4.68185	7.83096	7.51838	8.46023	3.70572	4.34322	4.18419	3.84556	4.12524	4.05532	4.04435	4.61467	3.6358	4.38024	4.37612	3.26016	4.34871	4.61742	3.90863	5.86636	5.10411	5.13015
Peak_6561	Chr3	1532785	1534047	AT3G05350	6.22505	6.22635	7.54087	7.24152	6.71571	6.39815	8.09791	7.5669	6.43849	6.7079	6.43849	6.95389	6.85107	6.13915	6.24848	6.77038	6.51919	6.63763	4.93136	5.44285	5.96865	6.94218	6.05065	6.10271	4.54352	6.2667	6.39164
Peak_6569	Chr3	1593398	1594774	AT3G05500	2.91632	3.0357	3.2267	3.56333	4.94211	6.14302	5.58912	5.3826	5.83264	2.31348	2.06757	2.37436	1.07915	1.76555	1.17465	2.27289	2.2526	2.32064	1.82643	1.70467	1.47786	3.08583	1.68557	2.57969	2.70503	2.11413	2.43524
Peak_6586	Chr3	1673908	1674523	AT3G05685	3.23688	2.30024	1.21149	2.88997	3.4637	3.38898	3.7092	2.76722	3.41566	1.96401	2.66582	2.58576	2.91132	3.00205	2.64981	2.52973	2.30557	1.76921	2.09209	1.33424	2.78323	2.35361	2.07342	1.96401	3.24755	2.15881	2.94601
Peak_6599	Chr3	1763120	1764024	AT3G05900	4.57718	4.79332	5.9794	6.37717	7.39069	7.77394	5.92854	6.93842	6.66052	3.30029	4.61169	4.63712	2.98243	3.11684	3.02784	2.80625	2.36851	2.35216	3.28758	3.93601	2.779	4.4464	5.16023	5.84135	5.29282	4.56628	4.76789
Peak_6601	Chr3	1771798	1772708	AT3G05935	5.61342	4.56508	4.22044	5.00715	5.00895	5.13526	5.98152	7.24638	6.80972	4.63545	5.00534	6.429	4.20781	3.80182	4.35396	3.27675	4.59395	3.72424	3.13059	4.1212	4.00391	4.74371	3.90468	4.98189	4.69319	5.30848	3.64484
Peak_6613	Chr3	1830855	1831945	AT3G06070	4.90274	4.1946	2.81147	4.11625	4.08461	4.63907	2.75421	3.36141	3.49098	3.12184	4.27294	4.72645	2.37001	2.76626	2.11086	2.56588	3.68836	2.63368	7.18234	4.398	3.61151	3.91285	2.91392	3.27251	4.44019	5.02177	6.2919
Peak_6632	Chr3	1917136	1918123	AT3G06330	5.05615	7.18409	7.31719	7.74311	8.95265	8.30046	7.08759	8.31877	8.59661	7.43531	6.98443	7.68155	5.60186	6.93785	6.7748	5.5769	5.28575	4.7234	5.62681	5.41052	6.0544	6.78812	7.76973	6.46868	4.66184	6.1093	4.83653
Peak_6648	Chr3	2012034	2014369	AT3G06500	2.72745	4.8807	6.75178	5.81659	7.27953	6.23809	9.54819	9.37579	8.67422	5.1108	5.40564	4.79766	5.18258	4.45005	4.79274	5.41901	4.92644	4.64427	3.37342	3.09899	3.55145	3.54301	2.69156	3.23058	3.05044	3.00611	3.01455
Peak_6664	Chr3	2102290	2103208	AT3G06660	3.77052	5.03153	5.74521	7.67877	6.7254	7.54461	7.93633	7.66267	6.84166	5.10844	6.62881	6.29254	6.70036	6.28002	7.09565	5.23365	5.85611	5.48764	6.04749	4.926	5.01006	7.09387	5.97058	5.1478	5.49658	4.95104	5.70943
Peak_6684	Chr3	2176906	2177381	AT3G06890	2.95606	2.95606	2.44496	3.69853	3.81594	2.64871	3.39808	3.24959	2.55892	3.09764	1.49529	2.73159	2.46568	1.89933	1.88897	3.96789	1.62652	3.96789	2.35517	1.42277	1.48148	1.57127	2.17215	1.7612	2.49331	1.96495	2.7972
Peak_6720	Chr3	2354651	2355901	AT3G07360	6.27163	8.63022	10.4882	9.72871	10.5289	10.7483	10.8981	11.7325	10.9927	8.52115	9.29377	8.26361	8.64467	8.09017	7.89439	7.69598	7.6224	8.97317	5.47141	7.07446	7.91015	7.87731	7.54093	7.45946	5.56207	7.27025	6.83532
Peak_6772	Chr3	2563962	2565715	AT3G08030	5.48523	7.66883	9.93958	8.75125	11.245	9.95457	9.47662	9.20391	9.63031	8.48603	5.92663	7.92186	6.89192	7.83939	7.20867	7.74849	9.02116	8.76531	5.96693	6.93034	8.27611	5.35309	4.48434	5.59207	6.02222	5.32123	5.44868
Peak_6790	Chr3	2650027	2651060	AT3G08720	3.24624	2.63261	2.79794	2.91876	4.78352	4.36065	3.82014	4.60865	3.78516	2.37507	2.16045	2.31943	1.97922	2.63896	2.64055	2.73435	3.54512	2.83927	2.31466	1.87907	2.02056	2.36553	1.72487	2.69779	3.37501	2.32579	2.30194
Peak_6791	Chr3	2652797	2654244	AT3G08730	3.65312	5.18338	7.08941	6.40147	6.35151	6.43552	4.57377	7.12119	6.2448	3.81999	3.76209	4.57377	2.16258	2.99696	1.67898	2.37373	2.72678	2.20004	3.26033	3.91875	2.95269	4.55788	3.20584	2.66321	3.47375	4.35014	3.30006
Peak_6852	Chr3	2945711	2946108	AT3G09595	2.07745	1.65205	1.4538	4.51835	2.25918	2.17657	1.05318	1.30925	1.11926	0.545176	0.421272	0.491484	0.111513	0.421272	0.111513	0.722772	0.508005	0.718641	1.27208	1.56532	1.14404	1.00775	1.05318	0.978839	2.41612	1.91638	2.64328
Peak_6853	Chr3	2946296	2947220	AT3G09600	4.70923	6.77952	8.09988	9.37937	7.4939	8.60989	5.30633	6.05447	5.60843	1.99387	2.0845	2.33507	0.543783	1.16043	0.293216	1.63135	1.54072	1.54072	2.99081	2.68693	2.83087	4.76965	4.36981	4.80342	5.7186	4.07837	4.67902
Peak_6869	Chr3	3016505	3017608	AT3G09830	3.76404	4.4832	5.50014	7.35387	7.01141	6.86252	6.05254	7.28836	7.42385	4.24198	3.69703	5.43462	4.49213	5.55672	5.54332	5.23809	4.70207	4.65294	2.62946	3.73128	2.96299	2.88556	3.5139	3.11337	3.93675	4.35515	3.20717
Peak_6875	Chr3	3043954	3044919	AT3G09920	5.16279	6.45094	6.1072	7.95349	6.54963	7.69824	6.99206	6.07828	6.07487	5.15088	4.72376	5.03346	4.49404	5.4878	4.16562	4.17413	3.1004	4.51787	2.47589	3.76233	3.37436	6.308	7.19455	6.21611	4.17073	5.45037	3.66364
Peak_6882	Chr3	3100992	3103378	AT3G10050	6.03319	6.14613	7.15912	7.64049	6.69429	7.37191	7.79681	8.00753	7.58608	6.52419	6.53246	6.46221	6.16128	8.37251	7.07235	6.41264	6.70806	6.64195	4.93067	6.34997	6.60683	6.46773	5.93541	5.66959	5.61174	6.42916	5.81765
Peak_6895	Chr3	3172062	3173048	AT3G10260	4.51334	4.92804	7.32294	6.11216	6.62511	5.5176	7.13474	7.76595	7.77926	4.93636	5.67748	5.39102	6.332	6.79499	7.58774	5.436	5.436	5.81072	4.82478	4.71486	4.71652	4.92637	5.72079	4.59828	4.24687	4.00871	4.59994
Peak_6931	Chr3	3355672	3356227	AT3G10720	1.31562	1.62309	2.71403	3.0895	2.35925	1.72361	1.64083	2.26169	1.73839	0.753895	0.289732	0.656333	0.987456	0.694766	0.682941	0.904675	1.31267	0.490772	1.14415	0.452337	0.895805	0.904675	0	0.65042	0.904675	0.745027	0.74207
Peak_6932	Chr3	3356350	3357670		5.3308	6.37606	7.22097	5.98409	7.66645	6.92606	6.37233	7.2919	6.13092	5.25116	3.80771	4.33656	5.64811	5.5946	5.32209	5.63691	6.76679	5.84597	4.31541	4.15987	3.30002	3.02875	2.91427	2.56461	5.22876	5.1454	4.56926
Peak_6965	Chr3	3533656	3534953	AT3G11280	5.25303	6.08379	5.0922	4.86045	4.78066	4.65529	2.7253	2.77848	2.3973	2.06677	5.11752	3.30024	2.23013	2.97098	2.96464	3.89545	4.10187	4.20952	5.19477	2.77722	1.82235	5.32015	5.81278	5.12893	5.33535	5.23024	4.32476
Peak_6977	Chr3	3618822	3619955	AT3G11490	4.09353	6.14319	5.85183	6.06491	6.94913	6.85201	6.06781	8.47551	6.39396	5.71702	5.54452	4.90382	4.3327	5.31984	4.73133	4.95311	5.2952	5.02704	4.13991	4.07323	5.58511	5.49379	5.56772	4.21384	4.42982	4.78351	4.89223
Peak_6978	Chr3	3622001	3622657	AT3G11500	3.7004	3.66287	4.9739	4.31338	4.66866	6.32245	6.15733	6.72277	5.2316	5.6144	4.66365	6.30494	6.49759	3.60032	3.93308	3.9481	4.2108	4.41346	3.58281	3.99313	3.9556	4.44599	4.24083	3.9556	3.828	4.05818	4.466
Peak_7017	Chr3	3834353	3835208	AT3G12030	7.3068	6.6078	7.00723	7.48538	8.6875	7.92897	8.62605	9.73023	8.7163	7.65629	7.22998	8.55499	7.57948	8.55115	6.4849	7.96738	8.4225	6.52523	7.65053	7.06291	6.50026	7.50267	6.10852	7.72542	6.0125	5.57659	6.01058
Peak_7022	Chr3	3857851	3859159	AT3G12110	2.52408	3.95564	4.14777	4.1327	3.84262	4.0988	3.38678	2.73253	3.10172	2.58184	3.44957	2.61826	2.28423	2.11344	1.57723	2.60068	1.49059	1.85727	2.8468	2.64714	2.51152	2.62579	2.81792	2.36962	2.36962	2.24153	3.3692
Peak_7036	Chr3	3922588	3923241	AT3G12300	3.0488	3.66962	2.6743	4.25525	3.48362	4.1346	5.65021	4.73532	4.24017	4.43119	4.39349	3.56154	3.84556	3.04126	3.29763	3.0111	2.85527	3.24988	3.91091	3.45598	4.06674	3.36047	2.77986	2.46317	1.28185	2.30734	2.69189
Peak_7037	Chr3	3923666	3925454	AT3G12320	4.2643	10.0281	14.7858	13.2845	7.92308	8.92001	12.9445	12.9895	11.2842	6.19659	0.815921	3.04776	2.3862	2.58835	2.99906	1.5712	1.40306	1.61806	1.04103	6.09185	5.95127	1.12465	1.39203	1.62633	3.46767	2.92556	3.2545
Peak_7039	Chr3	3930000	3931102	AT3G12345	8.13251	9.95662	11.0892	9.39925	11.9193	9.88955	11.3784	11.9327	10.9372	9.08629	11.6287	9.82994	7.69287	8.74948	8.52892	8.748	7.52149	9.72861	8.30389	8.48868	8.81654	10.7018	10.2934	10.4618	9.12056	9.69135	9.30536
Peak_7069	Chr3	4049470	4051157	AT3G12740	5.19235	6.08241	4.97129	5.53123	7.50806	6.18271	5.92173	4.40064	5.35789	3.72579	5.13392	5.06575	5.1534	4.90604	4.32955	4.66844	4.61585	3.98969	5.06575	3.99651	4.29644	6.20803	6.30736	6.25769	5.93146	6.42714	5.46306
Peak_7077	Chr3	4121959	4123574	AT3G12920	7.57608	7.35941	6.9566	8.53021	10.1659	9.65217	8.19657	8.222	8.93301	6.37171	8.19961	8.89741	5.40131	5.75834	5.01274	6.39409	6.84471	7.17225	8.53122	8.35931	7.64829	7.10715	8.00839	7.749	9.54434	7.7551	8.2637
Peak_7085	Chr3	4160304	4161077	AT3G13000	2.81398	3.4235	2.54001	2.72266	2.54851	3.38739	1.86041	1.62468	1.69476	1.40805	1.44415	1.62467	1.56733	2.11314	1.73299	2.1726	2.58674	1.94961	2.9053	1.8413	2.0558	2.24269	2.6016	3.17927	2.00695	2.40197	1.91775
Peak_7093	Chr3	4214647	4216276	AT3G13110	11.8292	11.8786	12.1378	11.9513	15.374	13.7362	10.1723	12.1025	11.7455	9.42707	11.8121	12.0037	9.36657	9.5975	8.56383	11.1657	11.202	10.3347	9.67515	9.56624	9.94845	14.902	15.7531	14.2152	9.45934	12.5805	11.8696
Peak_7128	Chr3	4408924	4409824	AT3G13520	3.16352	5.15942	6.48394	4.54459	3.9699	4.3731	2.86614	3.2967	3.20548	2.31334	4.53729	3.16352	3.82395	2.08529	2.28963	3.5959	3.67435	3.86956	4.18883	3.88051	4.00092	3.90788	4.72156	3.44083	5.21597	4.11951	4.45155
Peak_7169	Chr3	4651928	4653966	AT3G14050	5.20627	5.54245	5.04907	6.16723	7.95774	7.72556	7.40068	8.81551	8.20201	6.20109	6.61949	5.75608	6.04711	6.70172	6.57838	6.60579	6.04389	5.93908	5.34493	5.71577	5.93263	5.96166	5.26109	6.12209	4.85155	5.60694	4.76932
Peak_7182	Chr3	4713246	4714711	AT3G14200	4.31803	7.55066	9.20006	6.41257	10.9078	8.85807	9.06775	9.46917	9.99616	5.62655	5.60413	5.89454	6.20962	6.35538	6.24886	7.12346	6.85547	7.09767	4.28663	5.11413	4.56583	2.40177	3.35373	3.66769	1.91962	2.51614	2.63051
Peak_7196	Chr3	4814629	4815609	AT3G14400	8.80877	9.86273	9.18243	9.47231	10.6821	9.94818	11.5115	11.6758	10.8999	11.2535	11.3775	10.4542	8.57753	11.3658	8.81714	8.97298	9.52593	7.52021	7.89722	8.7166	8.81714	9.72031	11.6171	9.09697	7.17838	9.88117	8.48369
Peak_7215	Chr3	4957876	4959457	AT3G14770	6.47541	5.45921	4.71628	5.1849	8.42155	6.94609	4.70485	5.55272	5.0706	2.52179	3.86529	2.67349	1.21881	1.16582	1.29363	2.88027	2.43867	2.16436	3.69385	2.54361	1.48377	5.67014	6.89934	5.58389	5.87275	6.65828	5.53921
Peak_7218	Chr3	4973089	4974422	AT3G14810	8.02672	7.99714	8.23743	8.65515	8.20292	10.2792	9.38093	10.92	9.85533	8.2596	6.27695	6.84008	6.96824	7.49316	6.8179	7.66814	8.14748	7.87762	4.80444	7.12472	7.23686	8.17458	8.28548	7.38226	9.41296	9.74074	7.85543
Peak_7222	Chr3	5002212	5003165	AT3G14870	2.62248	3.50124	3.25484	4.15772	6.47521	6.09787	2.35885	2.67073	2.7586	1.05451	2.69312	2.98777	2.02114	2.13141	2.19689	1.75751	1.75751	0.878755	2.75688	1.93326	1.27678	2.19689	2.88438	2.19689	2.43984	2.70174	2.54839
Peak_7236	Chr3	5072727	5073445	AT3G15070	3.44761	3.44075	4.19749	3.02466	3.82941	3.6145	5.31088	4.86278	6.48142	4.41239	4.87878	5.36346	3.77454	4.32552	3.6145	3.91171	3.57564	3.18927	3.02237	2.75717	3.47505	4.86964	4.54728	3.92543	2.91492	3.70824	4.43068
Peak_7255	Chr3	5166294	5167120	AT3G15350	2.81253	2.88408	3.85406	4.89956	4.63719	6.74609	5.55151	3.91369	4.58352	4.16413	3.27764	3.81033	3.60361	4.45433	3.24583	3.04508	3.63144	2.67141	3.14248	2.90595	2.84234	2.73104	4.12836	3.26969	2.69923	1.92604	2.04927
Peak_7256	Chr3	5171483	5172990	AT3G15354	7.4788	8.94819	9.62183	8.74544	11.3081	9.90306	6.41492	8.24511	6.22089	5.08506	6.93378	7.3905	4.89213	5.24203	5.31179	7.917	6.53809	7.38288	5.93856	4.86596	5.32814	8.67894	9.11714	8.1688	7.11581	6.93378	7.5442
Peak_7257	Chr3	5174609	5175466	AT3G15356	2.51358	2.44269	2.59596	3.16305	3.44276	3.64584	1.79897	1.65337	2.05186	1.66103	0.867874	1.46753	0.683954	1.38898	1.35833	1.81621	1.95415	2.15915	2.95997	1.60739	1.44646	2.10742	1.66103	2.14957	2.81245	3.67841	3.58261
Peak_7260	Chr3	5179346	5179903	AT3G15352	3.16385	3.28463	2.62771	3.23161	3.38184	4.25087	3.59689	4.20669	3.00477	2.01497	3.37006	4.13598	2.51282	2.65716	2.1652	2.83097	1.741	2.10629	2.19172	2.65716	2.56584	3.1992	2.25358	2.94291	2.77205	2.64538	2.52754
Peak_7275	Chr3	5251708	5252621	AT3G15520	6.56616	7.93659	7.72257	8.16499	8.55345	9.84654	8.7315	9.21529	10.2566	7.451	7.99413	6.94563	7.61466	8.16319	7.93119	6.38632	7.60747	6.79816	7.13987	7.37367	6.23704	8.39519	8.2693	8.32326	6.71004	7.70459	7.42942
Peak_7276	Chr3	5253106	5254572	AT3G15530	8.94392	10.5507	12.0623	12.7055	14.6406	12.06	12.2886	13.1906	13.1167	10.6919	9.8392	10.7849	11.483	12.097	10.563	11.3127	10.7726	11.2376	8.72541	8.57414	10.302	10.1014	10.5799	9.31817	8.26488	7.57129	7.94441
Peak_7286	Chr3	5324280	5324970	AT3G15710	5.45947	6.01612	6.25163	5.31674	6.36105	6.40863	6.80115	5.7259	6.16361	3.50643	4.1963	4.66017	4.4889	7.30784	3.67057	4.40326	5.05983	3.83709	4.38423	3.45647	4.12493	4.00361	5.21683	4.63401	4.86476	5.70212	4.35568
Peak_7290	Chr3	5340021	5340797	AT3G15770	4.74731	4.63942	5.69085	6.30436	8.02431	8.06662	7.81487	6.58362	7.90372	3.57741	3.70222	3.19026	4.62673	3.86512	3.74877	3.24527	4.69654	4.85732	2.67406	3.83762	3.20295	3.92225	3.78897	4.22477	5.45602	6.65978	5.20427
Peak_7293	Chr3	5348274	5349264	AT3G15810	4.29774	6.4209	7.10595	6.8306	8.71324	8.96702	8.40804	9.72838	8.40803	6.88201	6.30478	6.83889	5.93821	7.29338	6.1754	7.34314	4.82355	5.91996	4.49678	5.6048	6.51212	6.28488	5.6612	5.09392	4.31432	4.0904	4.14513
Peak_7315	Chr3	5467968	5469625	AT3G16130	5.7374	7.86203	10.9731	10.3832	9.75664	8.27347	10.8066	11.4034	10.6341	10.9216	6.47997	8.09005	8.39344	8.2576	7.5408	7.83724	9.31348	7.9463	5.15741	9.07058	10.1145	7.50016	6.49386	6.97768	5.2744	7.13135	5.73739
Peak_7322	Chr3	5497535	5498336	AT3G16220	5.46632	5.08099	5.76351	4.11972	7.75573	4.74075	5.99102	4.66902	6.52391	3.81023	5.49911	5.69177	4.20785	4.33083	3.6852	3.65856	2.92685	3.23429	4.94571	3.91271	3.29167	6.86005	5.95002	7.25358	5.02974	5.73072	5.13223
Peak_7324	Chr3	5505364	5506890	AT3G16240	5.9002	6.53317	7.85402	8.12744	7.80019	7.31254	5.52451	6.25867	5.71181	5.11544	6.77861	5.65476	6.15317	6.12733	5.36088	5.48468	6.48581	4.64395	6.45674	6.92608	5.98739	6.42337	4.92491	5.68706	8.85406	8.14144	8.36857
Peak_7340	Chr3	5624562	5625387	AT3G16530	2.54131	3.00897	2.57116	3.18807	3.89653	2.61693	2.8418	1.1005	1.72538	1.82687	1.32936	1.39105	0.889556	0.843785	1.0607	1.77712	2.02986	1.58011	2.20697	1.82687	1.89255	1.92837	1.84478	2.09951	2.8816	2.97315	2.8418
Peak_7341	Chr3	5637035	5638602	AT3G16560	3.94069	5.30772	4.99007	4.73638	6.85401	5.20393	3.42176	4.36631	4.04657	3.21524	4.61057	4.71645	3.97424	4.38413	3.68594	4.86742	3.82433	4.03609	4.99322	4.70702	3.68489	7.24399	7.93065	7.65494	3.15444	4.52461	3.71739
Peak_7347	Chr3	5689740	5690498	AT3G16710	5.33636	6.57082	4.96169	4.92487	7.40679	5.75434	7.82695	6.26546	6.39106	5.56592	6.70293	5.90811	4.52204	5.62873	5.83664	5.22157	5.07864	5.3212	4.68014	3.86583	3.82901	5.74352	5.49662	5.71753	4.32713	4.72346	4.03908
Peak_7361	Chr3	5760941	5762220	AT3G16860	4.74259	6.04092	6.83585	7.53574	7.56913	7.40603	7.22111	6.11926	7.15561	5.69804	3.94894	4.72717	5.53238	5.85086	5.16124	6.35042	6.21301	5.82132	3.27088	3.64073	3.52387	4.21735	3.53158	3.52002	4.30082	3.34023	4.19166
Peak_7389	Chr3	5919251	5920294	AT3G17330	3.01204	4.81328	6.45392	8.08669	6.56728	6.41298	9.33055	7.95758	8.3323	3.03408	3.93155	4.3362	6.08548	4.54718	4.96915	4.7377	4.5771	4.4905	3.15532	3.09706	3.36945	3.36473	4.2559	3.6938	2.8908	3.212	2.88765
Peak_7401	Chr3	5990970	5993016	AT3G17510	5.8155	7.45286	8.2864	7.44724	7.86721	8.49678	8.14988	8.20931	7.63996	4.58687	6.30534	5.56977	3.64492	4.3821	3.44015	4.58687	5.05744	4.73382	3.89065	5.40595	5.81549	6.53741	7.45366	6.26599	5.24213	6.81687	5.65167
Peak_7403	Chr3	6023810	6025530	AT3G17609	5.52928	6.1377	7.06323	8.35266	10.3269	9.07283	5.26089	6.57611	5.92852	4.88074	6.07562	4.87119	3.91319	3.82341	4.39267	4.89221	5.12717	4.82248	4.99345	3.95522	4.65915	6.69359	7.93813	7.93431	6.05269	6.29721	6.18641
Peak_7418	Chr3	6090941	6093118	AT3G17790	6.47327	7.24309	7.79781	6.53365	8.08309	7.34195	8.92235	8.9382	8.84838	5.68911	4.53438	4.86721	4.98948	5.06344	4.36457	5.21061	5.29967	4.52608	4.11022	4.62268	4.28532	5.73515	5.02495	5.15929	6.00609	5.0725	5.66495
Peak_7419	Chr3	6094046	6095270	AT3G17810	4.40267	5.86262	6.24237	6.95356	6.5255	7.80162	8.05255	9.59436	8.02168	5.83712	4.05512	4.85488	6.36448	5.81297	6.82608	5.72039	5.09507	5.1729	3.89142	5.05079	4.53417	3.38956	5.40639	3.32515	4.87635	5.13265	4.68178
Peak_7530	Chr3	6744601	6745750	AT3G19450	5.29443	5.58602	6.02627	7.14119	7.10116	7.93306	7.09402	7.60002	6.57944	4.8113	4.08231	3.01742	2.23984	2.77014	3.49912	3.4005	3.94509	3.4005	3.61633	2.49427	2.99312	4.74412	6.00912	5.34589	4.22382	4.69409	3.42051
Peak_7540	Chr3	6803141	6804272	AT3G19580	5.74019	8.09116	9.13958	9.31964	7.18794	7.97789	8.95952	9.58102	9.03502	6.4009	4.79341	5.48316	7.54807	5.70969	8.36125	7.36075	6.02916	7.38543	4.64675	5.04172	5.82586	5.11288	5.31618	5.55432	7.10953	5.2973	6.36895
Peak_7565	Chr3	6958599	6961097	AT3G19970	1.55236	2.73767	2.92975	2.56073	3.42571	3.5895	3.49346	3.41124	2.80871	0.844587	1.27477	1.03534	0.940624	0.905761	0.745263	1.27478	0.842615	1.0064	1.23268	0.911681	0.931414	1.06823	1.00574	0.810383	1.17413	1.61616	1.48461
Peak_7579	Chr3	7023246	7023787	AT3G20110	3.24815	2.32011	2.64462	3.5666	3.76676	4.06094	4.3521	5.08301	4.02455	2.71437	2.32617	3.00552	3.44528	3.47561	3.55446	4.12767	1.95617	4.27324	1.85609	2.9479	3.25725	2.32011	2.62946	2.01076	1.32837	2.16543	1.70141
Peak_7584	Chr3	7068913	7069630	AT3G20270	4.38878	3.24408	3.58978	5.19923	4.41625	5.48082	5.58842	5.38009	5.70518	3.88511	2.98995	2.91898	3.26926	2.23216	2.05588	2.99911	2.73583	2.10167	3.56001	3.73172	3.15021	3.83017	3.45013	2.77017	2.91898	4.2766	2.96706
Peak_7603	Chr3	7194777	7195665	AT3G20600	5.3474	5.44725	7.23896	6.61214	7.50336	7.60136	6.63987	6.06482	6.14248	5.27343	5.34555	5.32706	4.84631	4.948	4.90363	7.37209	5.9206	5.78562	4.18066	4.26756	4.59854	5.66543	4.8611	4.61703	5.57852	5.22166	5.75233
Peak_7628	Chr3	7382328	7384099	AT3G21070	4.16328	5.44064	5.99074	6.7041	10.9249	8.40632	8.57609	9.6067	8.40911	3.62431	4.11875	3.64379	4.35252	4.43878	4.60669	3.54732	4.23378	4.03619	2.89518	3.43878	3.42487	4.86736	3.60854	4.36272	3.48609	3.59556	3.45362
Peak_7632	Chr3	7412571	7413677	AT3G21150	5.86983	7.82248	9.13959	10.3691	7.34582	8.92872	6.2856	7.40967	6.89144	2.95347	1.96156	2.77528	1.07507	1.43887	1.66606	3.58753	3.73305	3.39895	2.80201	3.10939	3.7865	4.23643	2.80201	3.3054	7.25078	4.92246	7.46906
Peak_7657	Chr3	7620872	7621542	AT3G21640	3.48846	3.6232	1.999	4.1058	4.64964	5.022	5.24739	5.69324	4.96811	4.35812	3.55215	3.30227	4.06415	4.04455	3.72363	3.12344	2.62369	2.34687	3.20183	3.38312	2.74863	5.28903	4.71089	4.63985	3.33412	3.6232	3.20918
Peak_7659	Chr3	7626977	7629134	AT3G21670	9.38361	9.73476	11.4357	9.2724	9.69743	9.13529	7.96377	9.20385	8.30044	8.75824	5.62148	6.96667	2.94023	3.21217	2.95242	5.78297	6.37102	5.96883	5.38916	7.6705	7.81294	7.81295	9.05226	9.36228	9.75228	8.68512	10.4112
Peak_7671	Chr3	7704010	7704917	AT3G21870	5.39119	5.50162	5.15766	5.24999	5.06171	5.03636	4.64714	6.10809	4.89878	2.21585	3.16266	2.3118	1.83569	1.47724	2.20499	2.80241	3.98637	3.2731	2.51094	2.32629	1.56956	2.62137	3.5899	3.83068	4.33576	4.0624	4.17102
Peak_7672	Chr3	7708865	7709824	AT3G21890	4.79096	6.91761	7.98607	7.36623	5.47073	5.44162	4.02557	3.6677	4.267	3.05642	0.69861	1.30989	0.695186	0.815045	0.580463	0.873263	1.83385	1.48455	1.49482	2.84067	3.23107	3.40573	2.88177	2.70711	4.43994	3.6677	4.10433
Peak_7673	Chr3	7771033	7771996	AT3G22060	2.95677	4.48461	4.39765	2.86981	3.79231	3.52971	3.93384	3.01987	3.27734	1.90468	2.77432	2.26106	1.42212	1.04357	1.04357	2.43499	1.60286	2.24742	3.08295	2.49296	1.3522	2.20138	2.61403	2.60892	3.00963	3.1955	2.88686
Peak_7698	Chr3	7946474	7947642	AT3G22420	4.15939	6.71155	7.14043	6.48094	7.53414	7.25573	6.75374	6.44017	6.82826	3.82754	5.36164	4.41249	4.30282	4.45327	4.33797	4.44625	4.37453	4.01596	4.54186	4.345	4.02159	4.30141	4.93418	4.5039	3.67145	4.94402	3.29882
Peak_7704	Chr3	7977508	7978679	AT3G22520	8.05905	8.59062	10.2611	8.82765	10.1909	9.0254	6.37599	8.48683	7.7042	7.7561	7.9763	8.04783	8.03661	7.16703	7.02958	6.22312	8.94406	7.63548	7.85007	6.80657	7.20069	8.99596	9.25122	6.7645	8.08289	8.0829	8.28205
Peak_7716	Chr3	8112642	8114680	AT3G22890	8.44225	9.03721	9.62088	9.27906	10.415	9.95302	7.77152	8.85502	9.1283	6.77589	8.83969	8.18105	6.06324	7.00726	5.87539	6.5421	6.83958	6.41876	9.23714	7.05886	6.98549	8.71716	8.64219	7.56594	7.46355	10.0723	8.79858
Peak_7737	Chr3	8284280	8285139	AT3G23210	2.76959	5.04796	4.75552	5.73032	4.16299	4.81286	6.53884	5.73606	6.08966	2.91677	2.90148	2.52302	2.33953	2.84222	2.76195	1.65717	2.41216	2.14457	1.38193	2.60712	2.94735	3.45578	3.7119	3.75969	2.33953	2.33953	3.8801
Peak_7746	Chr3	8375262	8375998	AT3G23390	3.71804	3.18721	4.75963	4.32247	4.38492	3.73365	5.34622	5.48227	5.0295	4.20872	5.09864	5.00497	3.70912	4.79085	3.1649	4.20872	4.15073	3.07569	2.72329	2.52256	2.61846	3.64667	4.23772	4.18196	2.27498	3.18498	2.41327
Peak_7765	Chr3	8532756	8534830	AT3G23700	9.71143	9.42861	10.3792	10.5979	10.3776	10.9472	11.4479	11.1081	10.7238	10.2469	11.7988	10.6961	10.1178	11.8749	10.3713	9.48486	8.63564	9.38663	8.88992	8.92874	8.19913	9.755	11.1453	9.68449	7.7262	9.09035	7.68976
Peak_7775	Chr3	8622144	8623222	AT3G23880	5.56969	5.97644	7.05809	5.85762	5.32289	6.53097	5.55598	4.89633	5.20558	5.12332	4.50632	6.56296	4.57793	5.06086	5.22996	4.79426	4.77293	3.57094	3.5298	4.47738	4.37683	6.44719	5.91551	6.87223	4.9725	5.35641	4.42863
Peak_7777	Chr3	8638790	8639493	AT3G23910	1.5107	1.74886	1.66247	2.71552	4.56245	3.63314	3.05175	3.30859	4.11881	2.5474	2.41198	3.47437	2.94901	2.01971	3.04941	2.46335	3.41133	2.4937	1.93799	2.00804	2.10377	2.16214	1.55273	1.91464	1.07173	1.54806	0.966659
Peak_7778	Chr3	8641480	8643120	AT3G23920	5.76779	7.97152	9.59728	10.8835	9.1395	10.8534	11.0387	10.0581	11.193	7.40756	7.43261	7.02091	5.67863	6.8416	6.56513	7.1892	7.85633	9.14452	6.9578	5.46928	6.15744	6.99186	7.61191	6.48801	7.04996	5.87497	8.0206
Peak_7779	Chr3	8646977	8647484	AT3G23930	0.660104	1.79911	2.29419	2.5304	1.96737	3.34582	1.15518	0.990156	1.15518	0.330052	0.540379	0.378589	0.165026	0.20062	0.530672	0.398004	0.831602	0.666576	0.896317	1.3914	1.65026	0.660104	0.330052	0.82513	1.38816	0.637454	1.15518
Peak_7789	Chr3	8696304	8697220	AT3G24080	5.37055	6.45505	8.60614	8.77464	9.86093	7.61663	7.06274	9.07042	8.3964	8.09704	8.26555	7.59871	7.74212	8.33187	7.7708	6.04097	7.14519	6.0105	7.48398	6.75441	5.59103	7.64711	6.46402	5.73265	4.7539	5.26658	4.03687
Peak_7794	Chr3	8733653	8734544	AT3G24170	4.9369	5.80117	7.29938	5.52291	8.65384	8.12496	5.84356	4.81343	5.7035	2.58915	4.87055	4.05787	3.21018	2.56151	3.14568	5.06405	4.3343	3.43685	3.94362	2.95218	2.70156	6.13104	6.91976	5.45104	6.91239	5.54502	5.71272
Peak_7796	Chr3	8743087	8744225	AT3G24190	5.81315	9.30133	10.9581	10.7084	9.78912	9.18732	7.43385	9.42112	8.88858	5.37298	7.9837	6.93306	7.07883	6.93306	6.83059	6.24178	6.88833	6.46259	5.55915	6.50588	7.00522	8.24781	8.63314	8.10349	6.51598	8.12514	6.49289
Peak_7802	Chr3	8863950	8864974	AT3G24420	4.15357	2.94439	1.76246	2.45205	4.18725	3.83764	2.68459	2.20829	1.47219	2.20829	2.15697	2.84496	2.37187	1.71756	1.79935	1.79935	2.75515	2.37187	3.15607	2.78081	2.75996	3.51851	2.86581	4.21291	4.00763	3.68209	3.77831
Peak_7805	Chr3	8889900	8893005	AT3G24460	1.52101	3.02931	4.59954	4.75566	2.34184	2.71707	2.98909	2.48315	2.99438	0.918214	0.728749	0.718694	0.269907	0.242916	0.161944	0.99707	1.18918	0.971667	0.836712	1.16113	1.24528	1.03994	0.761033	0.966374	1.40352	1.68772	2.0243
Peak_7815	Chr3	8960210	8961890	AT3G24550	9.70628	11.0528	13.6226	14.0656	15.503	14.6464	11.5564	12.7601	11.4029	10.4514	10.515	11.2992	12.5303	10.8142	11.0176	10.9364	10.9951	11.5447	9.93998	7.16969	7.08168	10.6783	11.4733	10.5071	9.17627	10.0837	9.1264
Peak_7832	Chr3	9097356	9097992	AT3G24890	3.1792	3.26435	3.08888	3.91206	5.43198	4.3172	6.82547	6.42291	5.78809	3.29274	4.28882	3.45531	3.02695	4.94685	3.10178	2.23731	3.44757	2.8076	1.4838	3.02694	4.12624	5.26683	3.37532	4.1185	3.05791	3.64369	3.42176
Peak_7847	Chr3	9195488	9196473	AT3G25250	2.5307	2.44568	2.66407	2.91414	3.23089	2.50569	3.34926	3.06085	2.84412	0.595165	1.02028	0.803555	1.10531	0.765212	0.56849	0.651847	1.53042	1.00695	2.02389	1.10531	0.718532	1.10531	0.935259	1.4454	1.35537	2.33065	1.19033
Peak_7856	Chr3	9268309	9268800	AT3G25510	1.9378	1.94782	1.87432	1.97121	1.81752	3.46799	2.51246	2.04471	1.4901	1.02236	2.18503	2.11153	0.511178	1.07581	0.851963	0.64482	1.87432	1.84425	2.11821	1.13595	0.80853	1.86764	2.14829	2.62605	2.62271	2.25186	1.90105
Peak_7857	Chr3	9270527	9271523	AT3G25520	7.34676	8.9279	10.4728	8.27665	9.29886	10.5206	8.04583	7.78533	8.51901	6.77959	8.12991	6.28662	7.50834	6.51745	7.47371	6.41028	6.06899	6.56856	6.58175	5.38147	4.32298	7.66332	8.6031	8.21894	4.70714	4.96104	5.35509
Peak_7864	Chr3	9302034	9303563	AT3G25590	6.30549	5.57062	6.92862	5.1312	6.97911	6.85234	6.17334	5.90905	6.11102	4.06864	5.75326	4.64128	4.10947	4.54781	5.15054	7.93638	6.76747	6.88672	4.87657	5.56847	5.53946	8.42415	9.82728	9.67687	8.42092	6.62995	8.36505
Peak_7888	Chr3	9517180	9518772	AT3G26030	6.67938	8.61312	8.63273	9.79153	9.11977	8.42016	9.39632	9.37156	8.85355	9.07953	8.28807	8.89276	8.19728	9.01968	8.49652	8.24887	9.23535	8.31491	8.31697	7.27786	7.76594	7.6122	8.34277	7.31502	7.85159	7.33359	5.4958
Peak_7901	Chr3	9594384	9595089	AT3G26210	2.0722	1.66242	1.70665	1.80444	1.67173	1.30618	1.30618	1.66242	1.30618	1.99303	2.66359	1.89757	1.21538	0.759029	0.922011	1.44355	2.21423	2.13739	3.75557	2.55183	1.73459	4.29341	2.37488	3.48316	3.81843	2.65195	4.04893
Peak_7920	Chr3	9709358	9709941	AT3G26500	2.42065	1.19062	0.886633	3.24254	2.25176	1.09773	1.86615	1.82393	2.25458	2.1054	1.7226	2.91322	1.82393	1.98718	1.00766	2.60923	1.50305	2.16732	3.11869	2.31932	2.51916	2.87663	3.39172	3.87022	4.4219	3.8083	4.08132
Peak_7925	Chr3	9756111	9758193	AT3G26570	10.8444	13.5693	16.6533	14.1825	13.7895	13.234	11.7085	11.6004	12.7321	12.4519	10.9036	9.84615	9.49815	10.4199	9.16197	11.108	10.3433	11.7575	9.08226	9.6536	9.23536	12.792	12.2823	11.7243	10.7055	12.0581	11.1735
Peak_7931	Chr3	9788456	9789201	AT3G26618	3.77014	3.48369	3.99489	4.95561	5.44477	5.45359	6.53329	5.16934	6.736	4.32982	5.8436	5.0195	3.9354	4.34524	5.39409	4.83221	4.73746	4.6956	4.16235	3.60047	2.93282	6.27989	4.43999	4.27033	5.1429	4.60305	3.83404
Peak_7955	Chr3	9946891	9948103	AT3G26980	3.64669	4.56412	5.56015	8.24063	11.3466	9.11875	6.55618	7.65385	6.18351	3.33636	2.94337	3.64262	4.36085	4.4923	3.70225	3.9394	3.28487	3.56809	3.76052	2.71977	2.62627	4.32562	3.05314	2.89865	3.17916	3.14529	4.27547
Peak_7964	Chr3	9989446	9990459	AT3G27090	5.61061	6.84912	8.73121	9.98269	9.09433	10.6246	9.73305	8.00982	8.5156	7.57861	7.19279	8.62259	7.8623	7.43595	6.5865	5.88781	6.77941	6.11801	6.118	6.20068	6.66917	7.6856	7.25926	6.19096	5.37392	6.23797	4.90056
Peak_7969	Chr3	10024054	10024901	AT3G27170	4.11529	3.57059	3.86329	3.90206	3.94083	3.82258	1.86477	2.06443	2.35907	1.38404	0.494299	0.692019	0.79088	0.319841	0.692019	0.59316	0.595098	0.69202	0.790879	1.25223	1.25223	1.81049	2.00046	1.59145	3.08404	3.17709	2.69248
Peak_7972	Chr3	10046337	10047316	AT3G27210	1.82159	2.53781	3.00746	3.11984	4.96994	5.00852	3.50899	3.92832	4.0256	2.88166	3.30938	2.56632	3.7002	3.25571	3.59285	2.9085	2.99908	2.49923	1.84171	2.34995	1.89707	2.91185	2.24931	2.76425	2.48078	2.99404	2.90682
Peak_7987	Chr3	10125969	10127373	AT3G27350	5.25076	6.85361	8.68342	8.55355	8.27159	8.30201	7.42103	6.77639	8.24468	3.83277	4.39903	3.1542	1.68006	2.80438	2.28258	3.58007	3.2595	2.32704	3.93924	5.17939	4.89275	7.47368	6.14227	7.35435	6.06037	6.81734	6.44412
Peak_7997	Chr3	10205221	10206509	AT3G27540	4.26569	6.33031	8.27633	7.71777	8.18323	9.22255	9.71353	9.45466	8.54795	5.46314	6.60448	7.25103	6.34561	6.09438	6.037	5.81639	6.87866	6.54455	4.33965	5.39683	4.15729	6.86591	5.66208	7.22936	5.5116	5.00788	4.3575
Peak_7999	Chr3	10211872	10212990	AT3G27560	4.91374	4.37756	5.04301	6.14768	7.44479	6.13299	5.52924	7.3214	5.64235	5.09148	5.22222	4.11902	3.82082	5.84213	5.24426	4.6787	4.19541	4.94459	4.57587	3.86342	4.0206	5.96994	5.34121	4.82266	4.71983	5.24426	4.77565
Peak_8004	Chr3	10255877	10257554	AT3G27690	1.49881	4.10066	5.95212	5.89237	2.90945	3.16023	7.22954	7.96229	7.62627	8.88409	0.409478	3.74701	1.99841	2.41278	1.79269	1.39889	1.6575	2.04837	0.799363	5.1792	5.99424	0.299761	0.549562	0.249801	3.04365	1.89849	2.29817
Peak_8012	Chr3	10328342	10329066	AT3G27865	4.13781	5.2828	6.02194	9.06238	5.12635	4.29879	8.01262	6.36883	6.28947	4.62528	6.45045	5.52993	5.70451	6.30534	4.91322	4.28292	5.36895	5.08781	3.40774	3.80679	4.52325	3.87481	4.9155	4.68877	3.65261	4.58447	3.91562
Peak_8018	Chr3	10382293	10383006	AT3G27960	2.88469	2.59231	2.41734	3.94141	3.87464	3.15174	2.93534	3.64212	2.46568	1.92466	2.49561	2.32294	2.61303	3.12182	2.46568	2.85476	2.47489	3.05275	1.29845	2.23546	2.85706	2.93534	3.59608	2.92843	3.6237	3.23693	4.57452
Peak_8030	Chr3	10494792	10495570	AT3G28160	1.96453	3.72648	3.61043	4.06832	2.84023	3.36143	2.24095	2.0827	1.9371	1.38635	1.9371	1.50663	1.61214	1.188	0.772306	2.58491	2.87188	2.34224	1.45599	1.44333	1.47287	1.82948	2.36756	2.04471	3.31079	3.20739	1.84003
Peak_8033	Chr3	10524584	10525455	AT3G28220	1.82664	2.45249	2.43552	2.44306	2.59387	3.36109	2.81065	3.9417	3.02932	0.978355	1.15367	1.05753	0.701249	0.672973	1.22907	1.24981	1.05753	1.53822	1.31013	1.24981	1.66264	0.769112	0.974586	0.959505	2.05285	1.61363	1.05753
Peak_8036	Chr3	10589382	10590560	AT3G28340	3.70584	4.99968	4.57723	6.98645	6.18059	7.29875	5.48766	4.83377	5.68982	4.67343	6.05511	4.96622	4.41411	4.47964	4.47964	4.54935	4.8756	4.52147	3.11748	3.36983	4.053	4.05301	4.03628	3.75046	4.86305	2.55979	4.6079
Peak_8054	Chr3	10876308	10877541	AT3G28860	3.9403	4.01623	4.80349	6.8136	6.66573	5.91044	6.62045	6.81893	6.87753	5.00463	3.60061	3.70318	4.29463	6.16887	4.94468	3.05713	4.6463	4.37456	3.32887	4.38787	5.28436	3.53268	4.14411	3.32887	4.08682	2.98919	3.82707
Peak_8066	Chr3	11035353	11035753		2.17259	2.50873	2.71779	1.88154	2.00042	1.87334	3.65651	1.74217	2.89815	1.38554	1.42243	1.84875	1.53311	1.67658	1.64789	1.64379	0.389426	1.34864	1.97173	2.57431	2.26687	1.90614	1.0453	2.29966	2.73828	2.76288	3.34496
Peak_8071	Chr3	11103414	11103837	AT3G29130	1.59339	1.43832	2.2447	2.79522	5.23376	2.98518	2.89601	3.15964	2.29122	3.04333	1.93455	2.84561	1.58176	2.07024	2.38039	1.99271	2.00821	1.59727	2.17492	2.64014	2.37264	2.9658	2.00821	2.77583	3.33797	2.41528	2.82623
Peak_8075	Chr3	11137282	11137946	AT3G29170	3.16398	4.4098	3.65589	3.06017	5.09203	4.51609	5.14889	5.10934	5.38866	3.53723	4.72867	5.70011	3.98712	3.89318	3.89565	3.06758	2.68197	2.77343	3.05522	3.23072	3.29746	3.86847	4.51115	4.73362	3.14668	4.25408	3.39139
Peak_8078	Chr3	11154063	11154541		2.49142	3.17776	4.14551	3.30474	2.8037	3.68565	3.6033	3.42485	2.97872	3.12629	2.56349	2.97529	2.27522	2.45024	3.1057	2.31984	2.38161	2.22375	2.42622	2.09677	1.42073	2.05903	3.32189	1.85655	4.36513	3.15031	3.32189
Peak_8103	Chr3	11923502	11924475	AT3G30300	4.87905	7.57426	8.0468	6.47896	7.91853	6.46039	8.05862	7.83247	6.96669	5.5153	6.43845	6.94813	6.75911	6.88062	6.35407	5.01069	6.6376	4.93981	5.40391	5.75494	4.95668	5.63175	6.35238	6.4182	4.56514	4.4757	3.70105
Peak_8108	Chr3	12449247	12450073	AT3G30775	2.63563	1.7233	0.912333	2.02741	2.737	2.69128	1.4013	0.608222	1.31781	1.31781	2.08703	2.415	1.31384	1.18862	0.912332	0.735432	1.52055	0.709592	4.14823	1.11507	0.98985	1.39334	1.92604	1.49074	2.72706	2.76681	2.60979
Peak_8109	Chr3	12450131	12451236		3.62198	2.48798	1.65419	3.15976	4.7114	4.84665	0.757986	1.13103	1.06118	1.21278	6.05942	4.25958	0.606389	0.661379	1.21278	1.17711	1.28858	1.3287	5.94647	3.15381	1.36437	4.73518	3.70373	4.33835	5.39507	4.701	5.66111
Peak_8162	Chr3	15952020	15953102	AT3G44260	2.55448	4.05711	5.69483	5.98776	3.8947	5.13475	4.00702	4.44719	4.27567	2.47707	1.31594	1.70298	1.47076	2.04904	2.95062	2.55448	3.36043	2.80795	2.70929	1.45862	3.25115	1.16113	1.52388	1.39335	3.42873	2.83831	3.63667
Peak_8177	Chr3	16163715	16164380	AT3G44590	5.28678	4.8203	3.93917	6.90836	7.23168	7.70803	8.52746	6.50358	8.14983	6.73558	8.57682	7.75493	5.07699	5.53606	6.24689	5.28925	5.10414	4.46982	5.55581	5.23741	4.14649	5.5879	7.42667	5.93097	5.44721	6.56775	5.74585
Peak_8180	Chr3	16193750	16194582	AT3G44620	6.21404	6.55542	5.6911	8.47745	8.08475	8.51099	7.0014	8.54257	8.37878	6.0759	6.07392	6.1272	6.81788	6.94614	7.50854	8.92935	7.23425	7.06257	5.64966	5.67136	5.7799	4.25846	6.06209	4.58209	5.33392	5.83713	6.34427
Peak_8198	Chr3	16466251	16467815	AT3G45010	2.2761	3.08486	2.97458	4.40619	3.95454	3.18989	3.38631	2.89475	3.0502	1.70051	2.57124	2.20047	1.77298	2.08913	1.82025	2.65842	3.15734	2.2992	3.08276	2.53343	2.35067	3.505	3.50185	3.43358	4.1352	3.74133	3.75918
Peak_8209	Chr3	16572949	16573856	AT3G45240	4.82275	3.96465	5.50162	7.80438	8.49411	8.13747	6.08455	6.53714	7.93291	6.75981	8.45247	6.49912	6.09179	6.31808	6.51903	4.78292	5.77318	3.68042	6.26558	5.22283	5.53964	6.05016	5.99404	5.87636	4.98567	5.90895	4.17826
Peak_8219	Chr3	16732552	16733214	AT3G45590	3.33468	2.99254	1.27685	4.04625	3.31485	4.77765	4.10575	4.55203	3.97187	2.74213	4.13798	2.64295	3.57766	3.62228	3.7165	2.71981	2.4694	3.29006	3.1413	2.86609	2.50163	2.73717	3.18097	3.26278	3.89253	3.62477	3.94707
Peak_8223	Chr3	16756627	16758785	AT3G45640	5.51381	7.79106	8.45725	8.38264	11.7669	12.1758	8.56384	8.19382	8.96965	5.94017	4.23243	5.16434	6.64216	7.26114	7.10506	6.49064	6.00337	6.02621	4.19588	6.34979	5.242	4.91309	5.37067	5.3387	4.62225	4.6725	4.74178
Peak_8254	Chr3	17094805	17095718	AT3G46450	3.00882	2.37936	3.68324	6.15791	6.15431	5.8234	6.13274	7.03017	6.14532	4.11307	6.08237	3.83431	4.59326	4.96913	5.41155	4.13105	4.58606	3.48541	3.87567	4.28032	3.67784	3.4998	5.595	3.7282	5.95289	4.01595	4.71555
Peak_8265	Chr3	17178553	17180170	AT3G46620	6.32422	7.92737	8.63954	7.80952	8.36219	9.98566	9.28568	11.1794	9.87695	5.94019	7.61649	5.63236	7.82374	8.01677	8.19456	8.4455	7.77904	7.1898	4.71497	4.87853	5.86196	4.87041	5.18129	5.73497	7.24872	5.17214	7.20198
Peak_8268	Chr3	17185548	17186061	AT3G46650	1.73653	2.26101	3.8952	3.94637	2.88143	3.46667	2.2834	2.1203	1.1417	0.489299	1.631	0.805904	0.815498	1.1417	0.326199	0.652399	1.6214	1.24723	0.799508	1.3048	1.86765	3.2524	2.7567	2.73432	3.64895	2.50726	3.99434
Peak_8291	Chr3	17339324	17340486	AT3G47080	6.13983	5.73277	7.5179	8.93837	6.91154	7.1391	9.34825	8.89597	8.98783	6.63169	6.17233	6.54406	6.67551	7.28468	6.07198	6.48752	5.72429	6.34336	7.14051	5.737	5.05292	6.31085	6.14689	5.91086	5.18578	6.55961	5.98294
Peak_8302	Chr3	17454031	17454777	AT3G47370	7.1979	7.1693	8.28936	5.38908	6.24067	6.40351	6.10644	5.8974	5.12281	4.19419	6.3595	4.69591	6.03383	4.75532	6.42772	3.98734	6.13505	5.4991	5.67074	6.87222	6.39471	6.3507	8.29376	6.86122	4.93796	6.97125	6.28468
Peak_8305	Chr3	17473167	17475266	AT3G47420	3.87543	4.9345	5.46051	7.35791	5.93016	7.05107	6.19552	6.13916	5.6288	2.5737	2.15571	2.67468	1.28607	1.59447	1.23754	1.39096	1.91149	1.4708	1.83635	2.25199	2.99952	2.98074	3.15373	3.2547	4.43118	5.45894	5.95443
Peak_8308	Chr3	17492455	17495081	AT3G47460	3.81882	8.74393	12.268	10.7725	6.95685	8.03435	11.0416	10.3727	10.5629	12.0478	3.31886	7.53627	9.08245	9.42409	9.57427	8.23396	7.6877	8.26525	4.18049	9.41721	11.5203	2.99974	2.75884	2.49478	4.88256	3.19122	3.92144
Peak_8314	Chr3	17526222	17527120	AT3G47560	6.03393	4.93502	5.87485	6.6227	7.42356	7.49487	8.42739	8.63766	8.22625	3.98056	6.40145	4.93685	4.89663	4.78143	5.23672	5.14713	3.94948	4.0793	4.90759	4.70646	5.73223	4.44317	5.4086	5.01548	3.33877	4.14513	3.35706
Peak_8316	Chr3	17532584	17533469	AT3G47580	4.47682	4.87756	5.39333	6.17256	6.15029	3.72542	4.46012	4.38591	4.9796	3.31169	2.10019	1.99629	3.27645	2.8386	1.98702	3.03526	2.49351	2.31169	3.78479	3.78479	2.92023	4.0668	3.95548	3.90725	4.55659	3.52691	3.50093
Peak_8343	Chr3	17698367	17700877	AT3G47960	4.33761	6.14833	7.29984	7.22521	8.30273	9.61986	9.14002	9.23821	9.81625	4.77818	4.24007	4.4489	4.07314	4.40111	4.20603	4.03844	3.96774	4.29441	4.60732	3.3622	2.70233	3.74451	3.33864	3.77266	3.6725	3.83944	3.5311
Peak_8370	Chr3	17891063	17892098	AT3G48320	8.11581	6.68464	4.98214	6.44505	6.76872	7.43354	6.12772	6.59261	7.21934	6.4625	6.1531	4.84568	4.60134	5.02974	5.90716	5.98809	7.20982	6.72113	5.06147	4.0349	4.92026	6.51645	7.2955	6.20705	7.83497	7.08448	7.3304
Peak_8373	Chr3	17916275	17917086	AT3G48380	4.07506	3.97991	4.02647	7.227	6.01845	5.7735	5.82816	6.58933	6.45571	6.48405	6.06501	5.52248	4.5184	5.2249	4.32405	4.23296	5.5488	4.32608	4.54066	4.23296	4.50625	5.49617	4.50625	5.92736	3.55682	5.83019	4.74107
Peak_8382	Chr3	17975631	17976507	AT3G48520	1.24268	1.82935	2.55471	1.44511	2.82836	3.47876	4.65959	3.44127	4.44591	1.06087	0.860318	0.860318	1.14709	1.04213	1.68502	1.72064	1.72064	2.19859	0.573545	0.764727	0.860318	1.0515	0.286773	0.669136	1.91182	0.955909	1.28392
Peak_8388	Chr3	18012859	18014080	AT3G48610	3.34273	3.94133	3.43555	4.13638	3.91039	4.71614	6.02498	6.42046	6.08148	6.11645	4.05163	5.3941	3.57275	4.32604	4.70403	4.28972	3.57275	3.8781	3.20283	5.13179	5.35509	3.23108	2.94994	2.76027	3.76645	3.43017	3.69516
Peak_8401	Chr3	18125876	18126575	AT3G48870	3.47309	2.63476	1.5569	4.40066	4.13765	4.26446	4.6848	5.68046	5.05113	2.45629	2.17684	2.9095	2.3741	4.19166	3.3275	1.43714	1.5569	1.31738	2.61362	3.09502	2.89307	1.59213	2.74982	3.07623	2.9776	3.99441	3.00578
Peak_8416	Chr3	18224026	18224907	AT3G49160	2.58682	4.04424	5.50912	4.50458	4.79345	5.55198	7.11004	7.1529	7.2349	2.31286	2.12649	2.45636	2.26999	2.85147	2.38927	3.13662	1.06418	2.41909	1.52637	1.98671	2.23458	1.47419	1.12568	1.39964	2.94652	2.47127	3.23166
Peak_8422	Chr3	18272515	18273365	AT3G49290	3.43631	4.05056	4.27849	7.20679	5.10714	6.00147	6.60992	6.48051	6.46698	4.4813	4.53152	4.33643	4.37507	4.51414	4.22054	4.64549	3.67969	4.56436	4.23019	4.32098	3.86899	3.34939	3.4479	4.04476	2.65981	4.28235	3.54641
Peak_8434	Chr3	18363548	18365023	AT3G49530	5.32784	6.7745	8.23565	8.6388	12.5768	10.4452	8.23565	8.32697	7.94497	6.53283	8.57754	6.67204	8.75351	7.09969	7.72224	6.42035	6.02054	6.58852	4.43021	4.57165	6.12857	6.92931	6.652	7.00169	5.67975	4.72534	6.58852
Peak_8448	Chr3	18440937	18442298	AT3G49720	4.52223	6.61619	8.2817	6.0224	8.16704	8.35773	7.05067	8.46394	7.98239	4.30378	5.52033	5.25722	4.65378	5.98015	5.92222	5.29343	4.18551	4.18551	2.64672	3.38171	3.84395	5.4793	4.39068	5.2355	3.13913	4.46068	4.23378
Peak_8452	Chr3	18465698	18466302	AT3G49780	3.15444	3.67883	3.67883	5.2248	3.45603	3.08108	2.27142	2.88003	3.12456	2.07851	2.35564	2.3964	1.5976	2.85829	1.6465	2.79037	2.34478	2.35564	3.05663	2.21708	0.969971	3.55113	3.05935	3.39082	3.3392	3.32562	3.98313
Peak_8458	Chr3	18493423	18494233	AT3G49870	5.80495	5.66509	5.47862	6.18194	6.80419	6.04411	7.23591	7.23186	6.67649	5.09554	7.88248	6.87513	5.81103	7.02714	6.15762	4.2625	5.12797	3.72133	3.83483	6.26504	6.45759	5.7563	6.76771	5.05906	5.37525	5.5901	5.72792
Peak_8492	Chr3	18763154	18763913	AT3G50560	2.29049	3.20971	2.5522	2.89177	3.20971	3.36544	1.67623	2.21479	1.42317	1.61134	1.50104	0.992761	0.330921	1.15714	1.21337	1.08577	0.880292	1.32152	1.1247	1.72165	0.992761	1.89036	1.21338	1.97255	2.46784	2.09583	2.06771
Peak_8512	Chr3	18901609	18902906	AT3G50850	5.20491	5.94069	6.28515	5.45819	6.54349	5.88243	6.43332	6.38646	6.43585	6.08632	5.94322	5.75706	4.70721	5.76465	5.42779	5.22391	5.66588	4.06895	4.35895	5.62408	4.99975	5.32902	5.61902	4.68948	5.15678	4.75407	4.30576
Peak_8514	Chr3	18919431	18920470	AT3G50910	4.56468	6.07254	6.20688	6.48822	11.0545	8.20471	7.53614	6.85175	6.1563	3.71433	6.43764	4.27227	5.52882	5.82754	5.17793	6.11521	5.62524	5.17003	4.62631	2.28234	2.40878	5.65685	6.04567	5.41028	6.56251	5.33283	6.46767
Peak_8516	Chr3	18929898	18931558	AT3G50930	2.33159	3.09559	3.92688	4.69484	5.98335	5.33415	3.75469	3.59931	4.05355	3.35982	2.01886	2.59384	3.08173	2.57405	2.83036	3.52608	2.43946	2.99761	2.50279	2.37216	1.16084	1.71306	1.56462	1.81698	3.52212	1.4132	2.79869
Peak_8517	Chr3	18935716	18937190	AT3G50950	4.37638	5.27573	4.55357	5.67804	6.77798	6.45368	6.52389	6.78021	7.31736	3.91612	3.85036	4.00527	5.00158	4.38752	3.89048	3.6754	4.33403	3.51046	4.0922	3.10147	3.0034	3.47703	3.99859	3.67652	3.10704	3.80802	3.18282
Peak_8521	Chr3	18972345	18972883		2.47026	2.14089	2.46111	1.86642	3.10764	3.09239	3.07105	3.89752	3.24183	3.85482	2.19273	3.48886	2.97651	3.0375	3.09849	2.64409	1.99145	1.89386	2.75693	1.86337	1.27477	2.92771	2.72643	3.62305	2.87282	2.33302	2.33302
Peak_8523	Chr3	18979281	18980008	AT3G51090	4.23818	3.58563	3.00985	3.74143	4.43913	4.44365	5.66069	4.86363	5.67423	4.8433	4.0056	3.53595	3.22436	4.29462	3.54272	3.65562	3.77304	4.46171	3.62175	3.22209	3.96722	3.00533	3.07759	2.84728	3.31467	2.26473	2.94663
Peak_8533	Chr3	19025218	19026660	AT3G51238	3.05861	4.38572	3.99841	6.10583	4.18067	4.28775	3.71134	3.02102	4.3766	2.20767	2.45714	2.38195	1.6267	1.45013	1.50823	2.24298	2.45486	2.60637	2.09147	3.54388	3.62135	2.4822	2.25779	2.90482	3.56325	3.17708	3.34339
Peak_8548	Chr3	19090941	19092439	AT3G51450	1.55606	4.15059	4.96426	6.63766	5.31078	4.80964	7.07081	6.19354	6.33609	3.15598	1.45408	2.54189	4.9193	4.86337	4.21968	4.18898	3.6352	3.8929	1.79402	2.07036	2.45855	1.33236	1.45408	1.34223	2.01334	1.34223	1.67778
Peak_8579	Chr3	19254833	19255794	AT3G51895	2.26576	4.33844	4.04796	5.40639	4.79467	3.85145	4.28034	3.74722	3.94543	2.17862	0.897078	1.65575	2.4691	1.39431	1.71214	2.96121	3.03981	2.27089	2.20596	2.88603	3.16967	2.61434	2.4093	2.84844	5.14154	2.5272	4.22395
Peak_8581	Chr3	19268120	19269562	AT3G51920	4.98491	5.75269	6.03862	6.46808	6.27669	7.33496	8.02871	5.61485	7.45913	3.66691	2.60978	3.54388	3.60198	3.27391	3.66577	3.12468	3.10418	3.40377	2.87976	3.3115	3.34339	3.09392	3.10987	3.05177	3.40605	4.15903	4.18294
Peak_8612	Chr3	19425802	19427142	AT3G52400	4.75118	4.87621	6.51754	5.25988	7.9652	7.29347	9.61267	8.65655	9.18977	5.28807	5.46703	5.37265	6.01865	5.58961	6.32509	5.87645	6.42071	5.98555	5.25865	4.3246	4.8762	4.51337	5.43885	4.34666	5.56387	4.77201	4.93627
Peak_8615	Chr3	19441254	19442235	AT3G52450	2.59123	2.84734	2.49414	2.17107	2.9779	2.63475	3.15869	2.5929	3.07666	1.10981	1.42283	1.83964	1.36592	1.77435	2.21962	1.96351	2.03883	1.92668	2.3937	2.21962	2.06394	2.50418	2.46401	2.29327	2.99129	3.55541	2.99799
Peak_8616	Chr3	19446925	19447716	AT3G52460	3.37267	1.28265	0.52925	2.84757	1.4902	1.84511	1.44454	1.0585	1.12699	1.37605	1.4819	1.74134	1.22039	1.16435	1.24944	1.76832	2.45115	1.89492	2.06719	2.02153	1.92813	1.94058	2.6421	2.01115	3.63418	4.26721	3.8106
Peak_8628	Chr3	19521603	19522469	AT3G52660	4.62043	3.6535	4.53701	6.32868	6.47846	5.42621	8.20567	6.78561	7.80562	5.59684	7.36766	7.0207	5.80161	5.31814	5.48877	4.5863	4.04975	4.74177	4.35689	4.97497	4.88586	5.56082	7.13825	6.15046	5.12475	6.28508	5.69922
Peak_8634	Chr3	19552304	19553118	AT3G52750	2.71881	3.88257	4.16695	5.45375	4.54613	5.365	5.76032	4.91523	5.55459	3.7434	4.32024	5.08465	4.11451	5.2581	4.74984	4.32831	3.80593	3.7434	2.98302	2.3013	3.29161	3.87854	4.42915	3.6002	1.7769	3.46507	2.61191
Peak_8636	Chr3	19569378	19570605	AT3G52800	5.22586	5.70239	6.25122	6.5524	10.1907	8.37689	7.7143	7.27524	7.1146	5.1201	4.9153	5.31152	4.23262	4.09474	5.24058	4.23932	5.31554	4.84704	6.28066	6.14413	5.08396	5.76799	4.02782	5.12011	6.75318	5.16964	6.81208
Peak_8658	Chr3	19714027	19714790	AT3G53190	3.28758	2.67438	2.76905	2.83145	2.8336	4.50536	1.52976	2.08486	1.75997	1.25651	0.877834	1.6653	2.15156	2.11068	1.09729	4.24932	3.30264	3.25315	1.84388	2.80778	2.78626	2.30432	2.20104	2.03107	2.08486	2.60553	2.12789
Peak_8661	Chr3	19744738	19746804	AT3G53260	8.38833	9.20665	8.97921	9.6846	10.0075	9.47782	8.89809	8.90843	8.57124	7.73781	6.40258	7.18272	5.69401	7.61932	5.98269	6.74136	7.4221	7.49049	6.4662	7.90243	7.69169	6.78351	8.91797	7.47856	9.06509	10.0417	10.0409
Peak_8682	Chr3	19849531	19851093	AT3G53540	5.08912	5.14907	5.6034	7.28925	7.7909	5.70541	5.87999	6.12398	6.37533	6.18603	6.64351	6.2344	5.42145	5.5445	5.34783	6.02617	5.9515	6.46473	5.24477	5.53503	4.97343	5.43618	6.32485	5.41514	4.15311	4.71051	4.34137
Peak_8696	Chr3	19915258	19915795	AT3G53750	2.67039	2.7865	2.57262	3.6695	2.64595	3.30591	4.90692	3.8406	3.75199	1.81183	2.49318	3.11647	2.72233	2.18764	2.85066	2.49624	2.18153	1.86989	2.49318	2.47485	2.02571	2.64901	3.16536	2.11432	2.93926	2.29458	3.27841
Peak_8700	Chr3	19933808	19935310	AT3G53810	6.36517	7.48728	7.81647	8.25613	9.67133	9.75008	7.52993	8.19926	7.08371	5.50773	7.28276	6.47781	6.38376	7.99146	8.75374	7.81101	6.23502	6.71952	6.69764	6.3586	5.00026	5.88067	6.9306	5.2715	6.06441	7.27729	5.48148
Peak_8701	Chr3	19940565	19941438	AT3G53830	1.05511	5.39027	8.36188	7.5776	3.38726	5.07806	9.21011	6.65603	7.83526	5.12132	0.95919	2.58041	2.86629	2.57665	2.97349	1.91838	1.54223	1.80742	1.15103	3.75965	4.91632	0.95919	1.28456	0.804968	2.26068	0.942263	1.64379
Peak_8706	Chr3	19955723	19956432	AT3G53890	3.53067	4.10716	3.32462	4.55862	5.9269	4.33636	6.03108	5.91301	5.17677	3.22738	4.81792	5.30874	4.86654	4.13494	5.11195	4.23681	3.18571	4.48222	3.7483	3.06069	4.0539	3.69505	4.85265	4.13957	2.71572	4.05159	3.48205
Peak_8717	Chr3	20005625	20006875	AT3G54020	3.28364	5.59361	6.32681	8.22946	8.86673	8.42523	8.23865	8.29253	7.76167	3.71987	6.41353	5.74209	7.18616	6.86554	7.02979	5.24015	6.65005	6.63428	2.74753	5.16657	3.51752	4.88012	5.17051	5.04963	3.26787	3.16406	3.6936
Peak_8718	Chr3	20010863	20011693	AT3G54030	5.40413	5.61578	4.70784	6.65824	5.72457	6.01338	4.74147	7.72838	6.97868	5.82348	4.92543	3.47549	4.81862	3.64363	4.28651	4.423	3.47352	4.19354	4.5397	4.80674	5.29335	4.90961	5.13709	5.02038	5.33291	3.73265	4.73751
Peak_8751	Chr3	20177944	20179096	AT3G54500	6.11324	9.64318	11.6206	8.73503	7.85397	8.59674	5.68127	8.2888	7.41059	3.04949	0.508961	2.46497	1.72505	1.09206	1.09063	1.38147	1.00937	1.2332	1.01792	3.01242	2.83564	1.16904	1.16334	1.30876	4.44521	5.38045	4.61772
Peak_8769	Chr3	20313964	20315200	AT3G54830	3.78058	4.37059	4.76659	5.27953	4.81177	4.9792	2.55007	3.4776	2.68561	2.91417	2.55804	2.98194	1.99328	2.62847	1.55741	1.76206	2.67232	1.76339	2.64308	2.11021	2.52216	4.80114	4.63902	5.39381	2.72813	3.04573	3.05503
Peak_8775	Chr3	20339185	20341143	AT3G54890	4.90032	8.74002	11.4604	13.4113	8.12916	9.66806	13.0966	13.0093	12.4119	15.5971	2.49547	8.08972	7.0333	6.86212	6.05156	5.04968	4.47742	5.68655	2.77824	10.0029	13.2418	3.46631	2.56679	2.74972	5.21749	5.64879	4.96073
Peak_8788	Chr3	20399634	20400404	AT3G55040	3.86109	5.45158	4.94203	4.72456	7.28511	5.78204	7.39385	6.18713	6.52398	3.26199	4.45805	4.04231	4.66273	3.8355	5.65625	2.90168	3.30037	3.57327	3.72677	4.32587	3.04453	5.08274	4.34932	4.2747	3.35793	4.04658	2.63091
Peak_8789	Chr3	20401813	20402578	AT3G55050	4.81549	4.09874	3.39273	5.07514	5.8906	6.86271	6.3155	5.58373	6.2039	4.49788	5.97858	5.88845	6.01077	5.25325	4.24252	3.12449	4.1202	3.22105	4.89917	4.61591	3.57084	3.50217	4.77257	3.9378	3.47427	4.96999	3.61161
Peak_8791	Chr3	20415274	20416072	AT3G55080	4.45201	3.76076	4.33886	5.3778	4.12078	5.21939	5.52181	5.93122	5.82835	6.30564	5.11241	5.77074	4.65569	5.61439	5.43952	3.56737	3.41925	3.34107	3.96443	4.0961	4.90256	3.61263	5.30168	3.42336	2.63747	4.03027	4.42732
Peak_8794	Chr3	20430394	20431500	AT3G55120	1.74328	1.59182	1.74031	2.57482	2.42336	2.42336	1.5146	1.74179	1.81752	2.04471	2.57482	1.18941	0.833031	1.13892	0.681571	2.07738	2.40554	1.87692	2.07886	2.17241	1.68982	2.75747	3.30837	3.02772	2.65055	1.97641	2.72628
Peak_8814	Chr3	20550321	20552148	AT3G55430	3.21024	5.26498	5.46281	6.73252	5.95558	6.69565	5.57701	7.24418	6.59673	2.90181	3.87027	2.60236	4.38823	4.74342	4.81626	5.22721	4.34057	5.17056	3.09424	3.3802	2.88922	2.66082	2.26785	3.09784	3.33344	3.34783	3.28758
Peak_8824	Chr3	20604817	20606341	AT3G55560	5.16096	4.58967	4.28786	5.16635	4.06043	4.99927	5.08227	6.44365	4.81172	4.50775	5.8756	5.99093	4.12295	3.45896	3.41584	3.18518	3.18841	3.19165	4.97448	5.56732	5.09844	5.2418	6.49755	4.99173	5.85943	7.4213	6.48353
Peak_8828	Chr3	20627449	20629193	AT3G55610	5.26012	6.01655	6.17575	7.68672	7.84685	6.87	5.35338	5.78576	6.51675	3.69923	4.14197	4.25124	3.34221	2.93056	3.29417	3.07469	3.27816	3.60315	3.55416	3.92531	3.41098	4.58189	5.61337	4.67609	3.81415	4.20509	3.81415
Peak_8847	Chr3	20752800	20753288		3.67079	3.41868	2.25895	3.61028	2.61527	2.82705	2.01692	2.34299	2.49762	2.05726	2.77326	2.47409	2.44383	2.90772	2.16146	2.40013	2.58166	2.93462	3.67079	2.56485	3.32791	3.08589	3.35145	3.23043	4.90783	5.48602	5.51963
Peak_8850	Chr3	20776284	20778641	AT3G55980	4.2475	5.79509	6.70552	7.62013	9.34408	8.52358	8.73062	9.2667	9.6766	3.68005	2.39667	3.28479	3.14258	2.74731	3.19974	4.37856	3.12794	4.01745	3.34195	2.77102	2.26979	2.62114	1.86408	2.6783	3.76998	2.42665	3.35171
Peak_8856	Chr3	20799969	20800964	AT3G56050	7.23366	9.16627	8.95997	7.74363	9.18772	9.5178	7.69577	8.90716	10.4404	7.90206	9.01773	6.83096	7.54228	7.88061	7.33598	8.24205	7.8047	7.46142	5.90344	5.48259	6.50583	8.14468	6.09654	6.64942	5.78461	7.26007	6.75999
Peak_8864	Chr3	20836534	20837258	AT3G56150	4.27612	6.17158	6.40284	5.77027	5.31227	6.31441	5.62516	7.24174	6.11943	5.38029	4.5686	4.55726	5.31907	5.33948	4.80666	4.22624	4.24211	5.05153	3.27397	3.94056	2.65954	5.27826	4.57767	4.5754	3.06085	2.36025	2.77517
Peak_8868	Chr3	20849924	20851373	AT3G56200	6.79282	7.9208	9.02497	8.71888	11.3195	10.7232	8.86852	8.6724	9.35372	4.89622	7.77455	6.9776	6.03214	7.48547	5.50159	6.19085	6.88011	6.32802	6.77354	6.64884	4.75678	7.43673	7.70994	7.75642	6.48899	5.66597	5.51292
Peak_8873	Chr3	20878509	20879701	AT3G56290	4.83216	6.137	7.37983	7.70362	6.95406	6.67573	4.55108	4.56761	5.4205	2.31894	2.88111	2.72265	1.75677	1.77468	2.58073	3.02027	3.34407	3.58244	3.373	2.52975	2.64825	4.03576	3.43639	4.47667	3.44327	4.28653	4.21625
Peak_8877	Chr3	20892584	20893510	AT3G56340	7.09826	7.95828	9.25983	8.42996	8.89986	9.63575	7.69407	10.8167	9.07186	7.12485	7.74371	6.52905	8.06113	8.73318	7.77208	6.17618	5.18139	6.25952	7.32346	6.62657	5.32857	6.49004	9.49035	7.11422	6.61594	7.69229	6.20277
Peak_8881	Chr3	20915431	20916061	AT3G56408	3.52464	3.57153	4.29573	3.32144	4.23842	4.96783	4.92616	4.67868	4.17069	3.52203	4.29052	4.0743	3.5064	3.69396	2.67799	1.93555	3.46993	2.889	2.5269	3.24068	3.62623	2.98018	2.87858	3.4022	2.5243	3.05573	3.18858
Peak_8904	Chr3	21034702	21036129	AT3G56800	4.3984	6.72135	8.227	8.88429	9.89841	8.78874	8.74731	7.47072	7.8667	4.61481	5.99499	4.74488	6.69717	6.78005	7.17948	5.40102	5.95586	5.92938	4.22573	3.69852	3.8873	4.28559	5.19267	5.29857	3.75723	3.80788	3.92874
Peak_8914	Chr3	21075038	21075958	AT3G56930	0.455121	1.75802	2.35592	2.66112	0.910241	1.64557	3.91225	4.18533	3.76947	1.27434	0.182048	1.09229	0.182048	0.0910241	0.180263	0.496171	0.546145	0.0910241	0.0910241	1.53313	1.99896	0.273072	0.240946	0.244516	1.00126	0.819217	1.36536
Peak_8917	Chr3	21099351	21100416	AT3G57020	3.37856	3.68542	4.89282	4.95141	4.16036	6.074	3.32767	4.09559	3.77485	3.21664	1.85813	2.60292	1.53893	2.07401	1.32613	1.81033	2.51657	1.80878	2.11256	2.79721	4.26984	2.52736	2.23284	1.6515	3.7841	3.7764	3.74093
Peak_8919	Chr3	21109685	21111026	AT3G57040	5.78021	5.73366	7.27946	8.71502	9.29806	9.6349	8.52516	8.1381	7.45829	6.42694	5.13837	5.39192	6.4098	5.3662	6.64742	4.42549	4.94117	5.36865	4.68884	6.5727	6.18441	4.82113	5.72509	5.28903	4.62269	5.05998	5.5585
Peak_8945	Chr3	21261894	21262854	AT3G57450	3.22771	3.68099	4.72782	4.12572	5.24438	3.83151	4.53453	4.32585	4.59953	3.26876	3.30639	3.66388	2.75561	2.94206	2.79153	3.02245	2.4768	2.8343	2.44259	2.52983	3.64336	3.32179	2.76074	2.50588	3.86059	3.07719	2.7043
Peak_8949	Chr3	21290375	21293293	AT3G57520	6.54137	4.99444	4.24772	4.99669	7.54093	7.66144	2.64729	2.46991	2.81961	1.78063	5.33344	4.53717	2.12076	2.42148	2.02841	3.34727	2.9007	3.0443	6.02497	2.81454	1.95295	4.82268	5.29234	4.6543	7.61639	7.23628	6.76718
Peak_8950	Chr3	21297315	21299570	AT3G57530	6.72598	8.65831	10.509	11.1007	12.2628	12.5412	9.4547	11.2326	9.98951	8.106	8.65174	7.22363	8.33917	8.62114	8.36102	7.3577	9.67329	8.43098	4.66687	5.25779	5.27455	6.01994	8.44773	6.64365	7.06406	5.22428	6.52123
Peak_8952	Chr3	21306631	21307974	AT3G57550	5.89391	5.21756	5.64686	5.88291	7.25395	7.21236	5.39001	7.07294	5.11482	3.28146	6.5727	4.59625	4.30394	4.03853	4.42869	2.80447	3.55543	3.45024	5.86333	4.32228	3.24355	6.16299	5.89514	5.87924	4.67819	5.30195	3.98594
Peak_8973	Chr3	21433328	21434443	AT3G57880	3.45696	4.18312	5.58829	6.60167	9.84652	9.69629	6.60314	7.15549	6.61787	2.40382	3.02981	3.1668	2.68957	2.92965	2.48336	3.65581	3.54976	3.83993	3.41719	2.40382	2.14606	2.74554	2.76469	3.10641	3.92241	1.98845	4.09769
Peak_8998	Chr3	21632750	21633781	AT3G58490	5.60991	5.84883	6.34579	7.94179	7.3636	6.94468	7.47191	8.69042	6.97017	5.50318	3.57906	3.37837	4.14292	3.81798	4.46785	3.73675	4.48697	3.89922	3.93904	4.58572	5.81219	5.95396	6.25818	5.68636	4.01868	7.61845	6.16102
Peak_9038	Chr3	21828333	21830522	AT3G59060	2.51522	7.00374	10.169	8.84794	4.47876	6.34772	10.527	10.2268	10.7844	7.2732	2.28554	3.75144	6.13681	7.49612	6.91817	3.33036	4.04117	3.94134	2.21273	5.64592	6.23138	1.9185	2.05661	2.05661	2.27653	2.22099	1.95303
Peak_9039	Chr3	21836503	21838102	AT3G59080	9.16926	8.38435	9.67267	10.211	10.4247	11.4007	10.5655	10.0209	11.8106	8.81584	10.8603	10.3908	8.56311	11.3452	9.41171	7.2676	8.37408	7.89224	8.42133	8.34531	7.93847	10.6507	9.2309	10.7278	8.36483	7.80286	8.37613
Peak_9049	Chr3	21932556	21933679	AT3G59350	4.26157	4.72224	4.59208	4.74271	6.70092	6.20077	7.80507	6.72286	6.04136	4.83484	5.52512	5.9697	5.89219	4.85093	6.41428	5.50465	5.81176	5.17267	5.56314	3.72923	4.16212	4.33469	4.99718	4.25133	3.06675	4.88311	3.2086
Peak_9056	Chr3	21966491	21967095	AT3G59430	2.66267	2.72516	2.04862	3.57558	4.19777	3.65165	4.05921	4.93137	3.84184	3.35822	4.76019	2.5241	3.74132	1.97255	3.04848	2.7795	3.7223	2.87459	2.77134	1.51881	3.20063	2.46161	2.31489	2.73059	1.80137	3.32562	2.25783
Peak_9062	Chr3	22008998	22009575	AT3G59580	2.21542	1.59544	1.85424	2.67898	3.38143	2.70457	3.91609	6.00921	4.35689	1.59828	2.59081	4.54459	2.71879	1.80874	1.74048	1.67507	2.13863	2.37468	1.44756	2.27798	2.58228	3.31033	3.10272	2.72448	4.00993	2.19835	3.30464
Peak_9070	Chr3	22054470	22055083	AT3G59710	1.91151	2.51655	1.90883	2.5219	2.83781	2.68253	2.99844	4.01577	3.19655	2.54332	2.73072	2.52993	3.64097	1.99985	2.45765	1.5019	2.83513	2.04804	1.63843	2.30773	1.97308	2.60222	2.21671	2.47104	1.97844	3.68648	1.90883
Peak_9102	Chr3	22268635	22269491	AT3G60245	4.50172	7.36348	9.09742	8.60448	7.5994	8.50473	6.93384	6.58475	6.78806	6.05535	5.99973	7.20811	6.71709	6.2836	7.17167	6.47158	5.92109	5.73504	5.15961	4.96589	3.78052	7.44212	6.54638	5.38595	3.71722	5.45308	5.01384
Peak_9122	Chr3	22361571	22362637	AT3G60520	5.87111	6.3795	7.66742	7.23452	6.73075	6.99265	5.73554	6.49505	7.39473	4.97142	5.02996	6.50428	4.28895	4.79271	4.53698	4.8035	3.99008	3.63575	2.90705	3.92845	5.0238	6.22082	6.50429	5.70165	4.25505	4.88515	3.15046
Peak_9135	Chr3	22461034	22461866	AT3G60770	7.00732	8.27025	7.71574	7.7414	8.31366	7.82427	8.42812	9.10103	9.67526	8.11435	8.66491	8.71425	7.54209	7.60918	6.88102	7.11388	7.51052	5.78779	7.7039	5.77595	6.47846	8.35116	7.88348	8.52284	5.44246	7.46513	5.73846
Peak_9172	Chr3	22731086	22732050	AT3G61420	5.10852	5.996	7.06574	7.56484	8.1474	6.17826	6.07776	7.60061	7.42345	5.51223	4.68437	5.82054	5.65872	7.46433	5.33507	5.32485	5.43217	4.86493	6.04709	4.14098	3.91273	6.45932	6.00281	5.58207	5.12555	5.3453	5.82736
Peak_9173	Chr3	22733389	22735114	AT3G61430	6.37897	7.43134	9.20465	9.76178	9.66559	10.1903	8.47894	9.24369	9.14655	7.72085	4.97422	5.53707	5.34279	6.01802	5.15803	6.75611	6.2323	6.85325	5.34279	6.34373	7.40276	7.44562	8.25704	7.76181	7.33419	6.89706	8.74274
Peak_9174	Chr3	22735640	22737363	AT3G61440	9.63867	9.23916	9.23916	9.92852	11.7659	11.0336	10.2117	8.63275	9.47848	7.04235	10.0639	9.69205	6.80494	6.90505	7.88236	7.92527	6.9575	7.78035	8.94644	7.09098	6.54559	10.0468	9.98192	10.6084	8.73858	11.2205	9.17432
Peak_9186	Chr3	22791931	22793069	AT3G61590	3.77826	6.10901	7.93464	5.59379	5.92572	7.48724	6.27209	5.02084	5.61399	4.80581	5.26763	4.86065	3.32221	4.29492	4.90683	4.46233	3.60219	4.37141	4.45223	3.33087	3.38283	5.08867	3.82733	4.09865	3.29912	4.40027	3.14037
Peak_9190	Chr3	22810080	22810855	AT3G61640	6.98822	6.23199	6.04982	8.46467	6.76156	7.78045	7.75504	6.42264	7.69572	3.9972	3.67734	4.72377	5.68548	5.2025	6.10489	5.32537	4.75343	5.5372	4.10523	4.8424	3.66039	5.46094	3.75784	3.6604	6.80604	4.86146	5.29359
Peak_9194	Chr3	22835094	22836244	AT3G61700	4.22444	3.70174	4.2173	5.55404	5.49691	5.42978	5.33125	5.97819	7.40204	4.44294	5.68114	4.44437	3.47181	3.71459	4.31298	4.1516	4.35011	3.65175	3.36612	5.43121	5.17129	4.3344	4.71286	5.06847	3.87026	4.54148	4.5272
Peak_9197	Chr3	22858286	22859452	AT3G61750	3.68761	4.09187	4.32991	4.75248	4.98207	5.34971	4.25526	4.36794	3.86508	3.94819	2.58611	3.30307	3.08897	2.81993	2.51428	1.86775	4.01017	3.1763	3.80733	2.93544	4.86375	2.87769	2.57062	2.43681	4.02284	3.65521	4.25526
Peak_9209	Chr3	22914220	22915368	AT3G61890	5.2132	6.84841	7.36343	8.63812	8.68246	7.69676	6.96572	7.09733	7.22322	6.74396	3.11304	3.64666	2.84551	3.29616	1.82119	4.31191	3.28329	4.58516	3.01433	3.8913	4.29044	5.07729	5.85841	5.94711	5.774	6.30191	5.10733
Peak_9235	Chr3	23039438	23040618	AT3G62260	4.65299	5.48672	8.08811	6.45685	9.78757	8.66016	8.58918	8.05888	9.42986	5.52708	5.25288	5.11091	5.8667	6.17569	5.44218	5.25289	5.25289	5.2515	4.33008	3.83319	3.18597	5.03019	5.30299	4.09068	4.79635	4.60428	4.78522
Peak_9317	Chr4	17712	18982	AT4G00050	7.21275	4.87317	4.9637	5.60388	7.91501	5.8897	4.34679	4.16832	3.56176	3.15437	3.42984	3.40139	2.52712	2.143	3.08841	4.90291	5.04388	3.57986	4.35714	2.76896	3.56305	7.30846	6.7019	7.07954	9.96878	7.43908	9.28591
Peak_9332	Chr4	128479	129513	AT4G00300	8.25547	9.28304	9.52603	8.16495	9.92943	10.5218	9.68644	10.8379	9.98819	6.16063	11.1778	8.65569	9.85638	9.99931	8.93681	7.28985	9.96279	7.81554	8.49529	7.19296	7.18026	8.08871	7.67578	8.29994	8.2507	7.52967	6.39568
Peak_9365	Chr4	333040	333560	AT4G00760	1.99716	2.43571	1.62486	3.03202	3.43271	3.99746	4.29404	4.95345	4.44864	3.03202	3.39485	4.18361	4.31928	3.54314	2.88373	2.74491	2.54298	2.11074	2.28742	2.69442	3.64094	2.04764	2.87426	2.25903	2.13282	2.60924	1.76999
Peak_9377	Chr4	412051	413081	AT4G00955	6.15584	6.15106	5.55795	6.37427	6.74894	6.58472	4.87397	4.59974	3.903	5.36025	3.74037	4.31594	4.97123	4.17564	5.18806	5.204	6.09206	5.42243	5.58984	5.58346	4.54074	4.71613	7.57323	6.74256	5.92784	5.36185	5.96451
Peak_9382	Chr4	436868	437536	AT4G01010	2.73719	4.16721	4.47926	4.06156	4.48417	3.78391	4.72497	4.90434	5.35152	4.13281	3.94607	3.6414	3.6414	3.01238	3.71511	3.00747	3.27038	3.25809	3.4178	3.4178	3.49151	3.30969	4.49646	2.43251	2.22612	3.13278	2.93621
Peak_9390	Chr4	472513	473821	AT4G01090	6.02011	6.21224	6.44832	7.77064	8.41484	7.2608	8.25285	7.85729	7.38888	4.80579	5.71872	5.887	7.09755	8.1122	7.2834	7.25327	7.20429	6.22982	4.57473	6.05527	5.5944	5.2428	5.6371	5.70491	4.41901	4.85225	4.29595
Peak_9398	Chr4	522812	524257	AT4G01250	3.79458	4.43232	4.48916	6.91619	5.1428	4.67672	4.70742	5.73621	5.69301	2.72373	4.03444	4.85747	3.56836	3.21255	3.5388	4.01057	3.84574	3.42058	4.65513	3.94236	3.63316	3.97647	2.31563	4.55623	4.63807	4.06627	4.34478
Peak_9408	Chr4	620675	622266	AT4G01460	4.5483	4.02274	4.13529	5.71609	7.01604	6.5514	6.08677	6.51837	5.58186	5.97732	5.21324	5.69234	4.61335	4.9262	5.58186	5.35677	5.03772	5.68098	4.1074	5.5292	5.32476	3.48892	4.10741	3.75222	3.45898	4.42336	3.33507
Peak_9426	Chr4	744866	745668	AT4G01720	2.82494	1.86078	2.16784	2.82494	2.6796	2.54449	1.68268	1.89148	2.03887	1.044	2.07162	2.03273	1.4616	1.8792	1.3572	1.566	1.914	2.21492	3.21183	2.08186	0.8352	3.88123	2.84132	2.02659	2.34593	2.8188	2.088
Peak_9461	Chr4	972578	974058	AT4G02200	4.26986	3.8836	4.17329	4.81039	7.56742	8.16455	4.52847	5.36202	5.13004	3.08779	3.81479	3.85474	2.87136	3.72155	3.4918	3.22653	3.92023	2.98235	3.23097	2.50397	3.16881	3.8492	3.41744	3.67383	2.81364	4.30093	3.50956
Peak_9468	Chr4	1046186	1046994	AT4G02380	5.13659	3.73459	2.90558	4.03125	4.85822	4.19379	2.63331	1.92825	3.03359	2.07251	3.10877	3.45013	0.829006	1.24351	1.45076	2.50734	2.4606	2.17614	3.18395	2.67192	2.05016	4.21411	2.77758	2.90152	3.30586	3.83618	3.52327
Peak_9473	Chr4	1064970	1066452	AT4G02420	6.10297	6.73144	6.17612	6.08634	7.71793	8.21561	5.87353	6.84007	6.00542	5.69396	6.44436	5.60639	4.35277	5.82253	3.43721	5.69285	6.05863	6.52749	5.7261	5.78374	5.35145	5.92562	7.83654	6.69265	6.95312	5.75492	7.29673
Peak_9533	Chr4	1433062	1433787	AT4G03270	2.24379	1.57134	2.1487	2.86871	2.90267	2.56304	2.76229	1.59851	1.93813	1.29058	1.90417	1.50115	1.61662	1.11397	1.59624	1.81587	1.60077	1.33133	1.50115	1.2136	1.67549	1.50115	1.61662	1.42643	2.18945	2.00153	2.82342
Peak_9603	Chr4	2572629	2573240	AT4G05020	2.3287	3.67972	3.73344	3.96443	3.10225	4.41567	4.38612	4.32703	4.89913	3.01361	1.86403	2.07891	1.80763	2.48448	1.40743	3.47559	2.10577	3.29026	2.12994	1.74585	1.50143	3.70927	2.05474	3.22849	3.17477	3.2634	3.8946
Peak_9647	Chr4	5189045	5189774	AT4G08230	2.21799	3.65462	2.64132	6.10003	6.8949	4.86831	5.742	6.377	7.9127	5.17455	5.51232	4.98766	5.03945	5.61815	5.17681	4.13424	4.47201	4.4675	4.24683	4.0892	2.69536	4.07344	3.94284	4.00139	2.78768	4.34366	3.67938
Peak_9673	Chr4	5647159	5648820	AT4G08870	4.13618	5.58018	6.20031	7.18935	5.27555	5.55743	8.66105	10.47	8.80643	5.54853	4.58619	5.10346	5.07478	4.18661	4.30728	4.64059	4.33794	4.79191	3.5289	5.58314	6.60186	3.44484	3.93441	3.22824	5.75029	4.2875	5.13906
Peak_9677	Chr4	5729348	5730275	AT4G08930	4.93314	3.04314	3.65601	5.90028	5.92508	4.81623	4.66035	5.86485	4.53104	3.10867	3.28935	3.64893	3.1069	2.8908	3.41511	2.89966	4.05456	3.09096	2.8536	3.25746	2.98468	4.42654	4.35037	4.40883	4.22461	5.2626	4.84634
Peak_9679	Chr4	5740314	5741547	AT4G08950	6.32339	6.49656	6.87754	6.55917	8.51066	8.5453	4.73022	4.03887	3.76712	1.90221	6.02367	4.57703	3.07444	2.98919	3.70985	3.52735	5.23109	3.7991	6.69104	2.73476	1.71572	3.5833	3.82574	4.20139	6.05564	5.89846	6.60579
Peak_9687	Chr4	5792195	5792710	AT4G09030	2.14075	3.06458	4.13177	3.37359	3.70489	2.351	2.27455	1.62468	1.62467	1.36664	0.592528	1.89545	2.574	1.22966	1.64697	2.30003	1.46221	1.36027	2.37967	1.32522	2.08659	2.73965	1.71706	2.27455	3.18882	1.46221	3.40863
Peak_9691	Chr4	5839690	5840746	AT4G09160	4.25021	3.8692	3.56906	5.19419	4.09159	4.88004	3.00765	3.43843	3.46331	4.12424	2.76038	3.6717	2.70129	3.72768	2.86769	2.538	3.48819	2.53955	3.35756	3.32179	3.84898	3.6857	3.33112	3.41043	3.72768	2.80237	3.93452
Peak_9705	Chr4	6049431	6050381	AT4G09570	5.28916	4.05503	4.8	5.03162	5.92006	5.46719	7.0211	7.35643	6.9485	5.53633	6.17069	5.52942	5.38596	6.44206	5.01433	4.90717	4.2659	4.98841	4.80346	4.05502	3.9565	6.02895	5.95117	5.82845	3.08534	3.68859	2.46827
Peak_9709	Chr4	6090079	6090976	AT4G09640	6.08275	6.22187	6.68865	8.06884	8.81385	10.119	10.6023	11.4406	10.6279	6.19075	8.96578	7.73935	6.2896	6.98518	7.7723	7.26342	5.98573	6.3079	7.45013	5.32858	5.13455	7.12248	7.14444	6.57333	4.80689	6.00953	4.90208
Peak_9713	Chr4	6132866	6133715	AT4G09720	5.5154	4.53686	5.36842	5.24272	7.09343	6.47266	7.26555	7.88632	7.7316	5.6701	8.49355	6.66411	5.0416	6.54421	5.69718	5.5444	5.00099	4.38795	6.54808	4.14041	4.75925	6.08782	7.10697	5.57728	4.47304	5.86349	5.79774
Peak_9726	Chr4	6276932	6277749	AT4G10040	8.21694	8.61281	8.44602	9.78838	9.7522	8.63893	9.04888	5.77939	7.31867	4.78065	5.98234	4.37875	5.66082	4.88313	4.75453	5.01376	4.36468	5.29308	4.2421	4.90725	6.61333	6.82233	5.53824	7.10567	5.63671	7.75475	6.14511
Peak_9734	Chr4	6314688	6316528	AT4G10120	5.73406	5.96532	6.96981	6.53676	5.82871	6.58587	5.41888	4.68047	5.48227	4.92601	5.86978	5.43584	3.52598	3.8617	2.95989	7.32785	7.11445	7.24392	4.84654	3.27865	3.27865	7.10374	9.72702	8.19662	6.10639	5.74478	5.64567
Peak_9746	Chr4	6442453	6443402	AT4G10390	1.60745	1.76491	2.11789	2.83943	3.71842	3.54193	2.35148	1.7528	1.29254	1.14719	1.72165	0.662706	0.882455	1.02434	0.794209	1.76491	0.671358	1.60918	1.67666	1.41193	1.14719	1.79606	0.970701	1.44307	1.86181	1.42404	1.47076
Peak_9749	Chr4	6463879	6464621	AT4G10450	5.41588	3.99554	5.0442	6.4225	6.44905	5.91144	5.30304	5.96012	4.73004	2.8274	4.48447	4.17916	4.51323	4.16588	4.03757	3.78536	3.94908	3.99775	4.23889	4.28978	3.12829	6.96232	3.57519	5.28092	4.17473	4.73889	4.02651
Peak_9775	Chr4	6733601	6734461	AT4G11010	4.73854	6.10359	8.14831	7.24336	9.80927	7.85047	10.6569	7.97648	8.62368	6.09977	8.77069	6.05777	6.41479	7.6271	7.85238	7.07727	6.13414	6.76989	6.29832	5.99668	6.5446	6.34797	7.11927	5.58812	3.21312	5.88404	4.18679
Peak_9793	Chr4	6864014	6865947	AT4G11280	3.62076	5.38949	7.15737	7.3537	8.71021	7.45399	7.91042	8.74931	8.64901	3.70065	3.51876	3.75929	5.45663	5.43538	6.19863	5.26794	6.15528	4.07462	2.82606	3.25103	2.79546	3.79669	2.99095	3.81454	5.00786	3.20768	4.48089
Peak_9795	Chr4	6891962	6892811	AT4G11330	3.97023	3.69949	4.96037	5.02999	5.82868	6.28314	6.90391	6.05108	6.08395	4.17522	3.61053	3.58539	4.49625	3.84646	4.95844	3.05745	2.85439	3.43455	3.31658	3.50804	2.97622	4.04372	4.52912	3.64921	2.76156	3.33979	3.53898
Peak_9801	Chr4	6951770	6952562	AT4G11420	5.88489	6.89231	7.89558	5.20706	6.32848	6.05279	7.81059	8.4055	8.24589	5.61127	6.62283	6.50053	6.92754	6.08388	6.37201	5.62163	5.79576	5.55323	5.63199	5.20913	4.8443	6.32848	6.86743	4.5085	4.88576	4.49192	5.85586
Peak_9818	Chr4	7120618	7121333	AT4G11830	5.78999	5.57419	6.68995	6.85524	7.24782	6.8208	7.77586	7.61056	8.15925	6.37771	8.34291	6.97921	5.91856	5.17013	6.46495	5.1311	6.06319	4.56634	5.45251	6.25833	5.21145	6.97922	7.06416	7.72305	5.24818	6.91264	4.04978
Peak_9828	Chr4	7194067	7195220	AT4G12000	7.50246	9.4468	10.1818	9.93111	10.1505	10.2701	8.3272	8.5722	7.26457	5.9071	8.03804	6.41134	8.16197	6.68341	6.02817	6.56661	7.90842	7.30446	4.26331	5.45983	5.12936	8.37706	9.04654	8.2802	5.2775	6.46547	5.93131
Peak_9829	Chr4	7196379	7197012	AT4G12005	4.87951	3.97724	4.04984	5.2036	5.63658	4.82247	5.11027	5.89068	4.89247	2.89867	2.11566	3.55463	3.1735	1.76305	1.94195	2.26604	2.19863	2.26864	2.67569	2.98163	1.85121	3.33943	3.11905	3.28758	2.95311	3.03349	2.62384
Peak_9846	Chr4	7336492	7337190	AT4G12390	5.61099	6.46933	6.43876	7.60282	7.05253	6.98669	5.37582	4.22588	5.18299	4.57627	4.14827	4.66328	2.9654	3.0289	2.49743	5.70976	4.37168	4.71972	4.842	3.16764	3.43338	4.66563	4.98545	5.65802	4.71266	4.74794	5.62509
Peak_9849	Chr4	7351442	7353129	AT4G12420	7.04843	7.59571	8.44292	8.77207	10.8151	10.113	7.96283	8.18291	8.67468	6.21582	9.09244	8.78277	7.94628	7.74762	8.29392	6.61411	6.24114	6.79621	6.02398	5.9636	5.40074	7.47982	7.59084	7.99594	5.16508	5.21475	4.74634
Peak_9863	Chr4	7487296	7489585	AT4G12720	2.20225	3.44693	3.80799	4.51432	7.3389	5.88318	5.27448	4.48919	4.93711	1.94383	1.68901	2.04361	2.24316	2.25608	2.55254	2.88417	2.30633	2.42764	1.57129	1.81822	1.3179	1.83042	1.3179	1.57416	2.23885	1.74285	2.37954
Peak_9881	Chr4	7603008	7604247	AT4G13020	4.18636	5.22566	6.28352	6.41741	7.96707	7.88223	7.66085	7.94189	9.16809	6.39619	6.28749	5.97066	6.11383	6.44524	6.93175	6.25965	4.62514	5.17794	4.89955	5.19516	5.09044	4.87171	6.3551	6.49032	2.86867	4.01933	3.54873
Peak_9882	Chr4	7613236	7614108	AT4G13040	5.87094	7.34904	7.09672	6.08183	7.12873	7.41117	5.97827	5.07447	7.02705	4.3213	6.6354	6.16279	5.43976	6.2061	5.14037	4.97844	4.78826	4.71107	6.13831	4.82404	4.29682	6.28519	7.29631	5.90295	6.1063	8.43925	5.56967
Peak_9888	Chr4	7651772	7652300	AT4G13150	2.85255	2.96752	2.5791	4.776	2.69407	3.3808	3.63871	3.53617	3.48023	1.79605	3.30311	1.69661	2.5356	2.35226	3.8034	1.36413	1.39209	1.54125	1.58475	3.1291	2.01978	2.00424	2.84944	1.74322	1.9017	2.29012	2.03531
Peak_9894	Chr4	7674473	7675422	AT4G13220	5.02826	7.74657	7.39705	7.00773	6.84162	6.22217	8.3989	7.3711	7.53547	6.42461	6.48518	7.44895	4.89849	6.17718	6.26543	5.49199	4.32922	5.90207	4.93655	3.91741	6.43327	5.49545	7.26728	5.11824	4.8535	4.67701	4.41227
Peak_9902	Chr4	7785373	7786064	AT4G13395	2.07849	3.62726	3.80779	4.4349	2.18063	4.13797	3.12605	3.24007	3.22344	0.410947	1.09032	1.40625	2.39205	1.66517	1.5749	2.126	1.45376	1.30648	1.60103	0.726877	0.88603	2.05949	0.605731	1.33261	3.02866	1.46088	2.66284
Peak_9903	Chr4	7790614	7791358	AT4G13400	5.25571	9.3376	9.64209	4.84532	7.94093	8.22115	5.93529	5.70803	6.1802	5.06375	5.78084	5.61536	4.97329	4.54303	3.93185	3.01398	5.22703	4.32681	6.18241	3.93847	4.61364	5.82056	5.3197	6.0743	5.62639	5.58668	5.33073
Peak_9904	Chr4	7806753	7807965	AT4G13430	5.57642	7.75278	8.7732	7.35843	9.43044	9.16483	8.27586	8.85586	8.53469	8.3409	8.82062	7.40585	6.78927	6.21739	6.49655	6.40712	6.40034	6.39763	6.76894	5.73632	5.90571	8.00619	8.34633	7.85441	4.13454	6.74455	5.94365
Peak_9932	Chr4	8035582	8036889		6.52614	6.98485	6.04231	5.56978	7.28394	6.00083	5.48181	6.4055	6.36151	4.8346	6.50729	6.24212	4.21504	3.461	4.03784	5.73818	5.82741	5.50946	4.10193	5.13495	4.55686	8.18627	7.20477	7.5001	7.38825	6.65684	6.79256
Peak_9969	Chr4	8272419	8273753	AT4G14365	2.09937	3.39347	4.21475	4.06453	5.16285	5.34139	3.61387	3.79487	3.72838	1.8211	2.11415	1.80263	1.8211	2.07228	2.51801	2.52171	2.305	2.68424	2.4269	1.78785	1.19313	2.55865	1.8211	2.73472	3.50059	1.61301	3.06964
Peak_9970	Chr4	8282414	8283392	AT4G14370	2.61428	2.53033	2.77547	3.26911	4.17243	3.70734	3.04915	3.44877	2.96184	1.11321	1.76132	1.96952	1.28447	0.941946	1.93594	2.26672	0.770683	1.82177	2.18276	1.1216	0.936909	0.770683	1.54137	0.685052	1.71431	1.96952	2.28518
Peak_10004	Chr4	8519406	8520552	AT4G14880	3.16863	4.47134	5.66512	7.10971	8.24617	6.68407	9.1992	8.9398	9.96304	4.82675	4.9328	5.40859	6.12516	6.47483	7.21289	5.62786	6.07786	4.85255	4.89697	5.56767	4.25493	5.11624	4.76799	3.67739	3.70461	3.94681	4.59458
Peak_10006	Chr4	8522630	8523821	AT4G14900	8.21757	9.12496	9.36215	8.92914	9.07393	9.41179	7.44669	7.64527	7.59562	6.42346	7.53633	8.07138	7.55564	8.21342	6.90887	7.76939	8.01761	7.33637	6.6248	6.60273	7.25225	8.74849	9.22701	8.82847	9.22838	7.92108	9.53314
Peak_10028	Chr4	8708771	8709370	AT4G15248	1.61913	3.17525	5.04095	5.67655	1.66844	2.6328	2.58897	2.79444	4.12591	1.95611	0.279444	0.978054	0.69861	0	0.857509	0.978054	0.69861	0.69861	0.419166	1.47393	2.02734	0.383551	0.838332	0.419166	1.95611	0.558888	1.38078
Peak_10029	Chr4	8712998	8714959	AT4G15258	3.16191	3.9461	4.34657	5.00174	4.69175	5.01933	4.77386	4.80653	4.6021	4.31557	3.94107	3.50373	2.97172	3.69308	3.11918	4.36082	2.71787	3.97375	4.0525	3.92348	3.23144	3.00188	4.65573	3.73665	4.27368	3.07729	4.10947
Peak_10033	Chr4	8827645	8829277	AT4G15430	6.76742	6.50469	5.69941	6.02857	9.25776	8.83398	3.49091	3.99925	3.69626	1.64278	1.69412	1.72331	0.770054	0.821391	0.66738	1.64278	1.33476	1.28342	1.70519	1.48676	1.07808	5.59573	4.82366	4.15829	6.99088	8.16257	7.06336
Peak_10042	Chr4	8870063	8870810	AT4G15530	2.24812	2.89201	2.47008	3.76885	2.58875	2.5426	3.3623	3.62601	3.36229	1.82619	1.38228	0.679051	1.34272	1.00869	1.25921	1.7207	2.57117	1.99101	2.09649	2.09649	1.46798	3.82818	4.14463	3.55568	3.28977	3.37768	3.49415
Peak_10045	Chr4	8877958	8879387	AT4G15550	5.79005	6.66252	6.73494	6.24065	4.75434	5.29461	5.80614	4.63594	5.51071	4.17269	1.52424	2.37832	2.00703	2.11049	1.93461	4.60951	4.89458	4.22097	1.63804	3.53127	3.61403	3.38644	4.79113	3.9382	6.85908	5.86246	5.62796
Peak_10046	Chr4	8883904	8885939	AT4G15560	5.14451	6.96996	8.8277	8.45469	9.12399	7.66832	11.0455	10.8259	10.4997	9.6512	5.02179	7.41158	7.041	6.85611	6.79395	6.65508	6.64217	6.29016	5.16388	7.01839	8.64684	6.81575	6.08993	7.14112	5.39398	5.95268	4.48812
Peak_10056	Chr4	8982129	8982909	AT4G15790	5.68275	5.68907	7.76012	6.75195	6.29522	7.72854	6.04687	6.58147	6.4636	5.23234	5.96478	4.62618	4.29364	5.42808	5.7964	5.55647	5.54384	5.55647	5.23865	5.45333	4.93768	3.86427	6.11843	5.94163	4.35256	5.69749	5.14394
Peak_10057	Chr4	8984736	8985669	AT4G15800	6.10349	8.06055	10.3274	8.04647	8.01655	9.28898	9.10068	8.97044	8.8402	6.86378	9.15523	8.99859	8.2647	8.52693	7.71911	7.93207	6.60683	7.6804	7.88631	5.92045	7.20521	8.22598	9.23971	8.12919	8.805	9.51074	9.25379
Peak_10077	Chr4	9128960	9129832	AT4G16140	4.55667	5.28912	6.66365	6.51679	6.14585	5.69395	4.59997	5.92367	5.10459	3.29699	5.19121	3.73571	1.8415	3.3403	2.30469	6.04229	5.25899	4.49453	3.99932	3.26121	2.40072	5.06129	4.36461	4.64705	5.95567	6.82935	5.7316
Peak_10127	Chr4	9427495	9428937	AT4G16760	5.69573	6.10013	7.66874	6.54326	8.67004	9.91513	8.99698	8.63132	8.93888	6.79728	7.08777	6.55692	5.40753	6.78589	6.05912	6.18329	5.84268	5.83471	5.67067	6.10013	6.27214	6.31543	5.63308	5.97483	5.40297	3.71818	5.17058
Peak_10147	Chr4	9560010	9561447	AT4G16990	7.75827	7.13185	9.0637	7.52394	9.38491	9.48093	7.91488	9.6524	7.7617	8.53901	8.91623	8.6739	5.12227	7.49764	5.59094	6.14992	6.41283	6.21622	7.64624	7.6451	5.83099	8.07148	8.72763	7.29188	7.5628	10.1965	8.37212
Peak_10152	Chr4	9597276	9598251	AT4G17070	8.72421	6.89516	5.98737	7.42905	9.27325	8.0741	5.39284	7.12926	7.01136	5.92841	6.93726	7.72378	6.30231	5.9082	7.31283	5.63705	5.66063	6.92884	8.56083	6.1962	5.7061	8.82358	7.70863	8.04042	8.02862	8.19537	7.30105
Peak_10160	Chr4	9662112	9663849	AT4G17230	3.47295	4.59656	5.12715	6.2848	7.69875	8.50835	6.7681	8.8479	7.33179	4.46225	3.03505	3.13057	4.27688	5.19429	3.32824	3.38878	3.08707	3.8664	3.92409	3.47295	2.74942	3.6659	2.41177	3.13531	2.70118	2.89886	2.50824
Peak_10163	Chr4	9670945	9672209	AT4G17250	6.09696	6.42312	6.43092	6.54397	8.7595	7.69137	9.67691	8.99601	8.61657	7.12871	6.84284	6.9143	7.87849	7.57182	7.68617	8.45544	7.88629	7.44578	5.90854	6.03588	7.08323	5.69933	6.6934	5.7786	6.45041	5.20685	6.27368
Peak_10171	Chr4	9704821	9705621	AT4G17360	2.19377	2.82584	2.48107	4.50041	4.12691	2.67808	3.87245	3.1624	4.04893	3.24448	3.24448	3.24038	4.18643	3.79857	3.61387	2.04191	3.03516	2.39488	2.19787	2.92024	3.20138	3.11725	2.82994	2.75812	3.10904	3.01874	3.00232
Peak_10185	Chr4	9779182	9779903	AT4G17550	3.74747	3.36043	3.93644	4.32576	3.43329	3.00299	3.8431	3.67462	4.51245	4.21648	2.1515	4.2529	2.37006	3.5494	3.20334	3.06218	2.11962	2.63416	2.83451	3.40369	4.09353	3.77935	4.91543	4.99056	5.50965	4.31893	4.01157
Peak_10190	Chr4	9816379	9818073	AT4G17615	3.36322	5.44632	7.55464	6.74196	7.0038	7.86012	7.832	7.62544	7.0552	3.80835	3.65997	3.31376	4.50078	5.07683	4.63461	4.34465	3.89854	4.17202	2.43804	2.1762	2.63297	3.07132	3.48347	3.73077	3.70749	2.4235	3.55912
Peak_10198	Chr4	9863941	9864687	AT4G17720	4.76853	4.42525	4.48026	4.90056	6.84581	6.14825	6.93604	6.87003	6.45852	4.68491	5.46169	4.50886	5.32526	4.31962	4.73332	3.7849	4.17219	2.5218	4.73992	4.74872	3.84211	5.27025	4.82574	4.71352	2.46898	3.84431	3.03011
Peak_10203	Chr4	9891177	9891992	AT4G17790	6.88337	6.67588	7.08683	8.87364	7.98325	9.25034	9.16171	7.88858	9.04083	5.93456	6.28306	5.98492	5.82981	7.30438	7.12509	6.28105	5.63441	5.83787	7.4877	5.08446	5.29598	7.37288	7.62065	5.58606	5.50749	5.41886	5.76937
Peak_10208	Chr4	9933805	9935641	AT4G17880	9.44754	10.235	9.84036	11.885	11.0296	10.7405	11.6255	10.1527	10.6448	9.30883	9.67929	9.06365	7.68742	7.46371	6.653	8.36301	9.34732	9.07529	7.40913	8.15451	9.39026	11.8117	10.8112	10.7701	9.44574	11.468	9.7124
Peak_10211	Chr4	9945788	9947403	AT4G17900	5.48574	5.14396	6.19472	5.06564	7.46927	6.61686	6.83556	7.15903	8.14468	5.18566	6.60668	5.55592	5.70647	5.40741	4.5845	5.06259	4.88864	4.8388	4.46142	4.45938	3.21637	6.57109	7.05527	6.95152	5.22432	5.34842	4.0169
Peak_10215	Chr4	9968034	9969163	AT4G17950	8.34114	7.09593	7.49306	8.91865	10.3733	9.95001	10.2555	11.9386	9.57325	10.1566	9.33759	10.513	9.98638	7.82763	8.73826	8.45751	11.4061	8.66844	7.8349	7.37959	8.15057	9.63726	8.8881	8.42551	9.08156	7.50906	7.3214
Peak_10218	Chr4	9992058	9994228	AT4G18010	4.02959	4.14695	5.28647	5.53179	5.80739	5.17593	5.82784	5.17441	5.3902	3.6495	4.53991	3.41781	2.48575	3.49655	3.27395	3.83576	4.47934	4.05458	4.47707	2.53648	1.90349	2.97336	3.01197	3.68206	3.68281	2.65535	3.58741
Peak_10229	Chr4	10071666	10072969	AT4G18197	5.17088	3.92039	3.68214	3.75399	5.80872	5.31206	3.98594	3.55104	3.52961	3.00521	2.70015	2.77704	3.34304	3.17034	3.69726	3.50818	2.82873	3.18295	4.06409	2.76444	2.235	2.76444	2.94344	3.3859	3.30648	3.01908	4.16241
Peak_10244	Chr4	10187356	10189036	AT4G18440	2.23735	4.54609	6.05884	5.3362	1.81296	3.93981	6.75019	7.02986	6.23583	6.38349	2.79473	4.71623	3.96426	4.5852	5.30295	3.07245	4.10703	3.28367	3.43719	4.064	5.98746	2.74291	2.74291	2.44368	2.37132	1.94497	2.17281
Peak_10282	Chr4	10469608	10470382	AT4G19140	6.52001	7.87746	6.29306	7.01633	7.2157	8.90191	6.81271	8.82768	6.88058	4.18901	5.1774	6.24851	5.70978	5.20285	5.30466	4.86562	4.5814	4.2187	3.4318	4.52837	5.24739	6.70454	7.24752	7.97927	5.04166	3.5018	5.40859
Peak_10289	Chr4	10498883	10500051	AT4G19200	3.1554	3.80082	4.49124	4.87653	4.5967	5.18447	6.11113	6.9056	7.00543	4.7331	3.44225	4.44624	4.37453	5.35461	4.30281	4.58264	4.00331	3.00494	2.58169	2.72512	1.79987	2.86433	3.63349	3.08369	4.93839	4.74716	3.76004
Peak_10291	Chr4	10507477	10508227	AT4G19220	3.90701	5.28814	4.03834	6.17023	5.3538	5.18089	5.38883	3.54805	4.74094	4.99484	4.30099	4.41043	3.88293	3.5962	3.68375	3.34886	4.32069	3.57212	4.13902	3.86542	3.62903	5.09553	5.76968	5.56174	3.82383	4.03615	5.10866
Peak_10297	Chr4	10588749	10590647	AT4G19420	4.59724	4.81191	5.288	4.61023	5.97355	5.44034	6.1865	6.38299	6.58034	3.62516	6.29383	4.82922	4.33064	4.6007	4.82143	3.78184	3.91082	3.43387	4.68034	4.1653	4.28216	5.95971	5.62039	5.16681	4.53492	4.45875	3.98266
Peak_10299	Chr4	10606293	10607299	AT4G19450	4.76976	5.68878	7.58232	5.89446	7.21177	7.31951	5.76061	7.78147	6.45109	5.97607	6.15727	5.18275	4.49553	5.29375	4.95585	4.95096	6.13442	5.99403	5.55656	4.13804	4.40411	5.40802	4.99176	5.03421	5.32803	6.32377	6.82653
Peak_10303	Chr4	10645451	10647248	AT4G19520	5.39488	5.60607	7.31111	7.40711	11.0969	8.69617	9.61955	10.3052	10.1187	6.66383	5.04564	6.16832	8.03244	6.66017	7.65029	7.39065	7.77371	7.93828	3.75749	5.4607	4.76589	5.73498	5.02462	4.98896	5.43968	4.80246	5.31534
Peak_10328	Chr4	10861273	10862281	AT4G20070	5.93165	6.72992	7.27405	7.87846	7.8475	7.86379	6.24933	6.83907	6.42853	5.2523	3.98321	6.01636	3.72744	4.41167	4.23084	4.21129	3.54172	3.68346	4.78148	5.31584	4.57133	6.60285	8.01693	7.23332	5.32235	5.48364	4.28623
Peak_10341	Chr4	10988123	10988463	AT4G20350	2.02943	3.51896	3.08512	3.58645	3.07547	4.34326	4.19865	3.0803	4.4686	2.82481	1.92338	1.5522	1.38348	2.1644	0.98338	1.53292	2.02461	1.48953	2.17404	2.60307	1.90409	1.96676	0.742356	1.22923	3.49968	1.21476	1.83179
Peak_10354	Chr4	11155417	11157614	AT4G20830	5.41598	8.87407	11.2193	10.8888	10.0766	10.2583	11.2829	11.2321	10.6936	8.46274	6.27526	7.24747	9.32428	8.93688	8.79628	9.38111	8.56371	8.4777	5.97313	6.60207	7.34993	4.57613	5.17741	5.48478	7.94896	5.65679	7.15549
Peak_10357	Chr4	11172761	11173943	AT4G20860	2.622	2.76373	3.26396	4.12823	3.49878	3.32231	3.63079	5.00084	4.03374	3.25701	1.55486	2.0662	2.40246	1.67575	1.62295	2.5164	2.51779	2.55253	1.82442	2.06898	1.40479	1.77162	1.48816	2.69287	3.18892	2.01896	3.54324
Peak_10365	Chr4	11241475	11242125	AT4G21060	4.76219	4.21426	4.25971	3.92388	3.82288	4.29758	3.38353	3.17648	3.45423	2.93912	3.1487	3.01235	2.7851	3.85823	2.96942	3.1184	2.42655	2.18414	3.05275	3.86328	3.0073	3.03003	3.1588	2.5629	3.1285	3.95923	3.1184
Peak_10396	Chr4	11471283	11472964	AT4G21570	3.45372	4.9988	4.9343	4.39777	6.88886	7.04718	6.21649	5.84219	6.46081	3.49183	1.84413	2.77743	3.15955	3.05694	2.65723	2.41682	3.13024	2.50282	2.77255	3.03544	3.01491	2.83119	3.2348	2.70805	3.14001	3.15564	3.7469
Peak_10414	Chr4	11603357	11604320	AT4G21870	5.98687	2.95677	1.13053	2.82718	4.70458	3.56893	2.71464	1.65231	2.77602	1.66084	4.38741	2.69076	1.04357	0.695711	0.792906	1.39142	1.56535	1.73928	4.00545	2.36678	1.72223	2.51172	4.08219	2.95677	4.43516	5.39176	5.02856
Peak_10433	Chr4	11749168	11750267	AT4G22200	6.82471	8.01571	9.84331	9.78353	6.93529	7.45682	10.3051	10.1257	8.83611	9.04681	8.22641	8.46401	7.38659	8.87645	7.24014	8.97658	8.45954	7.68994	6.33307	7.13254	6.63343	7.02794	6.39733	7.20129	6.09696	5.64716	6.47802
Peak_10454	Chr4	11883976	11885568	AT4G22570	6.17685	7.34494	8.57494	8.84633	8.41809	8.26228	8.156	8.61209	8.46349	5.74139	5.10472	6.03032	4.21008	5.15219	5.2626	6.09533	5.68361	5.61138	4.46083	4.42058	5.10472	8.26228	7.73396	7.31502	5.78886	5.97666	6.07675
Peak_10456	Chr4	11895483	11895814	AT4G22590	0.836748	2.3419	2.92119	1.2873	1.81708	1.74776	3.9956	2.68353	3.41135	1.51506	1.24274	0.505019	1.13382	1.26255	1.08926	1.91115	1.37147	1.65864	0.861503	1.9161	0.420849	0.475312	0.505019	0.500068	1.0645	0.757529	1.01004
Peak_10457	Chr4	11895815	11896482	AT4G22592	2.47553	2.73883	2.82003	2.71422	4.139	3.64931	4.44906	4.07994	3.70344	2.69207	1.3608	1.76437	1.35834	2.1507	2.07196	1.50599	3.12025	3.38847	1.1098	1.46169	1.79882	1.40263	0.627494	0.3888	0.976922	0.994148	1.45185
Peak_10461	Chr4	11931292	11931674	AT4G22690	1.75109	2.00001	1.691	2.5365	2.9056	2.88843	3.50646	3.81977	3.32191	1.6352	1.85409	2.09443	0.927045	2.76397	1.98714	1.78113	1.35194	1.70388	1.5322	2.34766	1.8498	1.03434	1.31331	0.77683	1.90988	1.31331	1.41632
Peak_10467	Chr4	11952693	11953680	AT4G22753	1.44247	3.80667	3.08959	3.28758	4.18767	4.31245	2.6304	3.37908	2.27601	1.79186	2.05473	2.10465	1.86673	1.74528	1.93994	1.76691	2.29265	2.54554	1.69703	1.13634	1.52733	1.52733	1.88171	1.27277	1.73696	1.49571	1.32601
Peak_10470	Chr4	11960132	11960717	AT4G22760	3.58211	2.33665	1.7027	2.99865	3.69431	2.45727	4.11508	5.05479	4.63683	3.14732	2.86401	2.1992	3.75883	3.10805	3.40819	2.37312	2.01687	1.64659	1.88503	2.13187	2.63679	2.3086	2.56667	2.78546	3.20903	2.81071	5.45311
Peak_10472	Chr4	11969781	11971225	AT4G22780	3.46049	3.80517	4.32732	4.15668	5.89716	6.43978	5.24306	5.07925	5.55703	2.93834	3.24549	2.84847	2.82231	3.88707	3.12945	3.65501	3.07485	3.597	3.11239	2.49128	2.47763	2.61072	3.07485	3.18747	2.84279	2.39686	3.05551
Peak_10477	Chr4	12006973	12008249	AT4G22890	7.0244	7.63583	9.45211	10.5166	10.5141	11.6211	9.95284	8.65403	9.71598	9.59241	9.7649	8.75056	8.32578	8.73512	7.81089	7.54572	8.11854	8.32836	8.07477	7.68088	8.59223	6.52624	8.20607	8.59996	5.44883	6.55585	6.36791
Peak_10490	Chr4	12087143	12088367	AT4G23060	5.43054	5.40639	5.36345	6.5094	7.30781	6.70665	8.07536	9.25353	7.47823	5.68415	6.70665	6.64761	4.93673	6.63419	5.88275	6.23566	5.86799	5.3554	6.13368	5.62645	5.31514	3.88873	5.7177	4.78645	5.07763	4.64287	5.14472
Peak_10495	Chr4	12137986	12140229	AT4G23180	6.01477	10.0634	12.5262	11.1219	12.4647	11.8208	12.8683	14.2337	14.0777	8.48778	7.0762	7.92007	9.7089	10.1089	10.5865	10.0466	10.6282	10.3455	5.90269	5.5291	5.65144	6.50483	5.67854	6.61251	5.94445	4.5065	6.11806
Peak_10498	Chr4	12155745	12156914	AT4G23220	3.10353	3.42105	3.10353	3.9746	4.00691	4.29352	4.74732	3.87063	4.66442	3.09088	1.59321	2.58932	2.65114	3.64584	3.1513	3.05857	3.636	2.99816	2.19172	2.38841	2.09478	3.3227	2.54436	2.74948	3.62757	2.57948	3.74418
Peak_10500	Chr4	12165790	12167101	AT4G23250	7.72405	7.917	9.29392	9.42798	11.9839	9.9141	11.1181	10.5794	10.4992	5.86101	6.9648	6.82823	8.14252	9.46681	8.90928	9.58334	7.63134	9.24757	5.34231	6.03015	5.60291	7.65515	8.7652	7.69148	6.49371	6.43107	6.58893
Peak_10503	Chr4	12179676	12180889	AT4G23290	3.70056	4.17176	3.45006	2.73107	3.12509	3.02083	6.00782	6.33549	5.74649	4.83794	2.10822	3.72899	1.81033	1.65733	2.3384	2.1502	2.10822	2.10551	2.20977	3.07635	3.79804	2.83127	3.23342	2.32893	3.04791	4.10541	3.1603
Peak_10508	Chr4	12236963	12238016	AT4G23440	2.52339	3.82407	4.63037	3.99094	5.00622	4.33249	4.63973	4.77229	4.84403	3.81783	3.88333	3.43729	3.89269	3.05052	3.26106	2.29881	2.6076	2.9975	3.40298	3.02089	2.40642	3.76481	3.47941	2.7854	2.97098	2.84154	3.42014
Peak_10509	Chr4	12248448	12250029	AT4G23460	4.35677	5.12048	5.80625	5.96211	6.99701	7.03545	6.87752	6.08784	7.16949	6.14706	7.2495	5.87067	5.67429	6.88895	6.55541	5.1132	5.23062	4.21338	5.77819	5.59013	4.22688	5.6452	5.8821	6.10031	3.95881	5.36985	4.45132
Peak_10510	Chr4	12253158	12254345	AT4G23490	6.2749	7.66825	7.23239	7.70422	9.2041	7.61566	7.39428	6.40081	7.31403	5.61212	6.62496	6.48521	4.98256	5.05589	5.15552	6.7744	7.26422	6.5461	7.00547	6.28458	6.01615	8.31303	8.32687	8.41542	5.9442	6.10333	6.64295
Peak_10513	Chr4	12299759	12301186	AT4G23570	4.30977	6.14809	6.27702	7.03445	9.08573	8.51132	6.45889	8.04282	8.03937	4.95784	3.68471	3.92184	3.98055	4.71611	4.17623	4.37538	3.74112	5.09367	3.61564	3.6778	2.72698	4.10947	4.18314	4.24185	3.40499	3.04124	3.44528
Peak_10519	Chr4	12326562	12327567	AT4G23650	8.933	9.63724	11.8578	8.88234	13.3562	9.98691	8.18953	8.59476	8.77449	8.55554	9.21077	8.48038	7.85457	8.23528	6.26306	7.9428	8.38234	7.28757	6.49835	6.79247	6.4477	8.99509	9.08986	8.41666	8.91665	6.99999	7.66665
Peak_10524	Chr4	12366328	12367505	AT4G23740	5.40441	6.51097	6.01978	6.29887	6.70213	6.85005	6.81098	6.26258	6.31561	4.17366	6.02257	4.68996	4.91044	6.73423	5.73093	5.01788	5.25929	4.16668	3.99644	5.15044	5.08207	5.47976	6.70074	5.76582	3.77178	5.34859	4.92299
Peak_10531	Chr4	12407515	12408432	AT4G23850	6.81689	8.6666	10.6596	8.03988	9.43119	10.1958	9.92361	10.5056	10.6524	7.13382	9.81975	8.75792	7.90201	9.38821	8.87431	8.39801	7.55462	8.93161	6.15794	7.43107	7.30035	7.57969	7.36303	6.15615	7.57969	7.01923	6.39251
Peak_10551	Chr4	12539663	12541250	AT4G24160	5.23984	6.99438	8.86901	8.25724	9.67019	8.53465	8.57814	7.64134	6.99024	6.23666	7.06994	6.51925	5.96546	6.93745	5.34438	7.33287	6.68799	6.61553	4.744	4.22437	4.02562	6.16628	5.9106	6.00894	5.33196	4.4345	5.22638
Peak_10566	Chr4	12612427	12616169	AT4G24380	4.39076	4.48957	4.70959	6.48996	6.75653	6.05474	6.84085	7.18296	6.80088	5.45968	4.3991	4.68807	4.77283	5.18476	4.83519	5.60197	5.27172	5.30553	3.2094	3.88791	4.20016	4.75131	3.95379	4.20587	3.17076	3.89055	3.95818
Peak_10579	Chr4	12686402	12688189	AT4G24570	4.29794	5.00675	6.51724	8.93236	7.45772	7.12308	8.77791	6.89509	7.36119	4.54708	3.6783	3.24069	5.31657	4.15452	4.68866	4.45423	4.97274	5.2513	3.79689	3.29585	2.53187	2.71942	1.63368	2.20367	4.71624	3.20943	4.03224
Peak_10588	Chr4	12744586	12745407	AT4G24700	3.32757	4.38544	4.14347	6.1992	5.30132	6.71913	5.68127	5.38131	4.55941	3.16159	2.94762	2.74365	1.83576	1.97375	0.863888	3.00761	3.16159	2.62766	2.80964	3.05361	2.52367	3.83951	3.56954	3.83951	4.99735	4.23146	4.55541
Peak_10613	Chr4	12864521	12865812	AT4G25030	6.68076	7.56499	7.9594	9.40726	9.06882	10.28	6.61841	7.0001	6.83342	6.41612	7.46066	7.38559	7.21511	7.36905	7.63496	6.70747	6.46701	5.44282	6.30161	5.19091	5.90339	5.97718	6.22909	5.71128	5.7698	4.19472	5.38557
Peak_10614	Chr4	12869994	12871358	AT4G25050	7.13874	7.73484	10.0494	9.35214	11.539	10.5841	13.7006	13.1696	13.3538	10.9152	6.85453	8.14789	7.32179	8.35261	7.77819	6.14163	7.5253	7.30854	5.2818	8.72111	10.2686	6.26928	6.20305	5.05661	7.15559	7.61562	7.06287
Peak_10617	Chr4	12885597	12886854	AT4G25100	4.94313	5.86433	6.08254	5.6631	4.94835	5.43704	4.56811	4.91699	4.79808	3.86512	3.92784	4.57072	3.55544	3.37251	3.39864	3.19088	3.46528	3.332	4.44006	3.6443	5.16134	4.92483	4.33161	3.79849	5.33904	4.87126	5.20054
Peak_10626	Chr4	12923753	12924705	AT4G25230	4.50705	4.99001	4.61744	5.84382	7.56867	6.70452	8.43628	8.36211	8.23274	5.80587	6.90805	6.23708	6.78041	5.7179	6.18188	5.35568	4.5312	4.22245	5.77999	4.17588	5.55231	4.53465	7.61007	5.68168	4.39838	4.34492	4.76923
Peak_10629	Chr4	12944273	12945751	AT4G25290	5.41595	6.62184	6.91525	7.3676	7.5532	7.67879	7.04973	6.73409	8.27562	6.94414	6.17837	5.72492	5.49486	6.12169	5.66157	5.08252	6.14393	5.03139	5.76493	5.99944	5.22255	5.95832	6.95748	6.39066	6.05723	5.21478	5.03806
Peak_10639	Chr4	13015320	13016222	AT4G25470	2.76513	4.17774	3.97568	5.61764	6.04361	6.11824	7.12309	6.6953	6.29299	4.8276	0.557031	2.69232	2.88346	2.69778	3.49874	2.39742	2.48298	3.96111	1.7166	2.83613	2.87981	1.11406	0.715403	1.02122	3.99206	2.4138	2.56671
Peak_10655	Chr4	13094674	13096046	AT4G25700	6.53684	9.87351	11.1126	9.01151	9.93935	8.22133	8.05971	7.47906	7.51976	4.51832	6.32852	6.35007	4.9613	4.38184	4.33515	7.38807	7.47188	7.79752	5.89513	5.74308	5.40546	8.4536	8.97679	8.7577	6.71642	7.42519	6.96066
Peak_10673	Chr4	13192518	13193552	AT4G25990	2.91276	1.94555	1.79626	2.64594	3.38604	3.96256	2.99694	2.99694	2.42995	2.34101	2.55542	1.56438	1.71208	1.2245	1.81531	0.97198	2.17266	1.85026	3.95144	2.14248	2.13137	3.72592	2.85876	3.85457	3.71163	3.9038	3.30822
Peak_10684	Chr4	13253105	13254398	AT4G26150	3.12498	4.73447	4.38386	4.43594	4.28731	4.92374	2.52666	3.33204	2.75912	1.68952	2.29038	1.92326	1.80385	1.68444	1.09247	2.46441	2.27514	2.65877	2.64607	1.73525	1.6819	1.7073	1.61965	2.00456	3.73346	3.24185	3.03478
Peak_10689	Chr4	13285686	13286491	AT4G26230	5.28215	5.26991	5.21281	6.81785	5.89602	5.61458	6.38957	6.18562	7.20942	4.74577	7.09113	4.62137	5.58807	5.41675	5.20669	4.97012	4.32565	5.20057	4.5765	4.04829	4.02993	6.05918	5.69208	4.99459	3.84842	4.31953	4.84571
Peak_10708	Chr4	13405346	13406342	AT4G26555	6.55867	8.61794	10.4678	8.13816	10.7943	10.1842	11.6516	10.3211	10.6492	7.27586	10.1677	8.73829	8.46955	9.92868	9.32854	5.42269	5.54964	5.609	5.58591	7.14726	6.2454	7.92217	9.74897	7.6287	6.43501	7.44239	7.4902
Peak_10719	Chr4	13458253	13460163	AT4G26690	5.22383	7.45769	9.17546	9.17546	8.59483	10.2137	8.17852	8.65763	9.38275	5.73734	7.38285	7.07061	7.44049	8.21034	8.08991	6.69386	6.45473	6.91492	5.73734	4.62428	4.57353	7.7923	7.23749	7.23835	5.5137	5.35199	5.04491
Peak_10730	Chr4	13499062	13501786	AT4G26850	10.8285	14.2651	14.5027	14.0835	12.4753	13.885	11.9408	13.9562	12.9904	7.52583	10.8948	10.1927	6.1529	7.16028	6.33446	10.2235	10.4135	10.0262	8.76787	8.16163	7.41424	10.7368	11.9191	10.96	11.1102	11.9366	10.706
Peak_10731	Chr4	13503946	13504870	AT4G26860	7.70715	8.7645	8.41265	7.50101	8.78938	8.50327	6.79196	8.37	8.45707	6.59114	6.40811	5.35608	5.06109	5.49469	6.23929	6.47919	7.11361	5.84478	6.62491	5.31876	4.7892	5.98872	7.2149	6.21619	5.89098	6.40278	5.0451
Peak_10737	Chr4	13533634	13534306	AT4G26950	2.78931	1.95398	1.6902	3.15568	2.97005	2.18113	1.98574	2.49133	2.23487	1.40931	1.95642	1.98818	1.24566	0.622832	0.747398	1.78301	2.45469	2.12252	2.20556	2.03458	0.683894	2.26174	3.44634	2.7942	2.98959	2.9896	3.25338
Peak_10743	Chr4	13570730	13571568	AT4G27020	5.71114	6.43605	7.28244	6.88667	7.38627	7.68603	8.37372	8.16996	7.71542	6.29498	6.65156	6.69466	5.06263	6.05988	5.89138	5.23505	5.15276	5.8091	4.50621	5.4388	5.1312	5.15276	5.65236	5.92861	4.82557	5.09986	5.36043
Peak_10744	Chr4	13571785	13572885	AT4G27030	6.396	7.36047	7.57696	7.76806	6.85285	7.48588	6.42884	5.20459	5.17024	3.731	4.33566	3.60409	2.59632	3.07557	2.05735	4.264	5.32701	3.8803	3.12185	2.7277	3.35028	5.17771	4.75519	4.95227	5.35836	6.46617	6.40644
Peak_10750	Chr4	13594590	13595397	AT4G27090	5.80005	4.31088	5.76343	8.67261	7.77341	7.16106	6.83352	7.73272	6.91896	5.48472	7.43773	5.13887	5.71257	5.11242	4.65062	5.11039	5.16939	5.28128	4.73403	4.71775	4.48176	7.14885	6.20897	6.95966	4.56517	5.29145	4.43904
Peak_10758	Chr4	13661509	13662010	AT4G27270	1.06093	1.00199	1.65361	0.834992	0.969245	0.717111	3.31705	3.17297	3.86061	2.1939	1.30652	1.70928	1.90902	1.30979	2.17098	1.29015	1.11332	0.956148	0.559936	0.880834	2.29541	0.687641	0.500995	0.612328	1.16899	1.33599	0.667993
Peak_10759	Chr4	13662875	13664359	AT4G27280	4.89927	6.31281	7.20057	7.21496	6.6316	6.5674	7.39096	7.77396	8.16138	5.44276	6.18551	4.99557	5.85565	4.55722	5.30108	6.3593	5.98406	5.76267	5.1284	4.98228	5.22138	3.85654	5.16604	4.95351	5.22691	4.13881	3.77684
Peak_10764	Chr4	13691761	13692873	AT4G27350	5.87511	7.53219	10.1241	10.2216	10.8803	10.2275	8.58669	10.1832	9.54076	4.1235	5.61664	6.17639	5.4985	6.37282	6.03461	5.86477	7.01232	5.72003	4.84423	4.42331	4.20768	7.19545	5.9844	6.32408	5.06281	7.21465	5.49849
Peak_10768	Chr4	13718465	13719725	AT4G27430	5.21294	7.58802	9.24094	8.87464	9.96571	9.90574	10.0153	9.54336	10.0126	7.54109	9.20313	9.13534	9.36477	9.36477	8.7912	7.27517	6.74983	6.85281	6.11369	8.07815	7.12004	9.05713	8.85639	8.05339	5.25725	6.78112	6.18278
Peak_10773	Chr4	13743115	13744368	AT4G27500	3.47241	4.26939	4.53681	5.62611	6.28546	7.02739	6.04951	6.157	5.15027	4.27726	5.81618	4.01116	3.27578	4.77013	3.57465	4.64429	3.7018	4.02951	3.77521	3.46978	3.79618	4.7898	3.14208	3.19582	4.11733	5.25121	4.60103
Peak_10786	Chr4	13811633	13812679	AT4G27654	1.16808	2.09281	3.08505	4.29395	2.66586	3.47127	3.96739	2.64388	4.28766	1.1147	0.33441	0.926299	1.10685	1.6014	1.42713	1.33293	2.06926	2.06769	0.24021	0.640559	0.32028	0.817969	0.32028	0.40035	1.20105	1.12098	1.28112
Peak_10788	Chr4	13816691	13817404	AT4G27660	2.58079	2.93994	2.12956	3.97134	3.5224	3.3083	4.8623	4.6551	5.32274	2.20093	1.32148	0.923192	1.52638	0.598578	1.05672	1.66221	1.52868	1.89243	1.37213	1.28925	0.529511	0.805779	1.05672	0.633112	1.93847	1.64379	1.47342
Peak_10794	Chr4	13830973	13832074	AT4G27720	4.56442	5.36543	5.67122	5.70553	8.23982	7.91166	7.57157	9.63451	8.54412	5.44896	7.43881	6.23804	7.06441	6.99878	6.35439	5.35201	5.85768	6.60201	5.42808	3.55309	4.5495	5.39228	6.7452	5.43405	4.22134	4.2467	5.04025
Peak_10808	Chr4	13904501	13905459	AT4G27940	5.38731	7.09452	9.17882	7.65845	10.1627	10.4592	7.14251	5.95124	7.32763	4.10176	4.47714	3.73495	4.53199	4.5457	3.22073	4.63312	3.38871	4.78739	3.5584	4.424	3.5104	4.17375	5.07021	5.15762	5.59471	4.27488	5.18162
Peak_10831	Chr4	14011465	14012631	AT4G28280	4.23976	3.94678	3.62986	6.58642	3.75522	5.64128	4.80882	3.66366	3.94678	3.47773	3.64535	3.67775	2.83261	3.51717	2.80162	3.26363	3.50027	3.73127	3.90312	4.38203	3.97354	4.03975	4.08201	3.42843	4.07778	3.3073	4.5257
Peak_10836	Chr4	14030377	14031147	AT4G28360	4.64354	5.12964	7.11669	7.67528	6.87577	6.41312	6.66896	7.39812	7.72005	5.6797	7.0378	4.25764	6.78409	5.87158	5.46437	6.59861	4.48364	5.10619	3.82484	5.30233	4.75654	4.59024	5.38122	4.81411	4.13186	4.89299	5.58589
Peak_10838	Chr4	14048236	14049395	AT4G28400	5.99841	5.6399	6.65168	7.66771	7.55859	8.54486	7.27093	6.80189	7.04845	5.11133	5.03623	6.07068	6.34559	5.99841	6.17129	5.22895	5.45284	4.99088	4.84209	4.63945	4.85484	7.19724	5.20344	6.7948	3.39669	5.29413	3.68577
Peak_10859	Chr4	14167688	14168471	AT4G28706	4.12205	5.45553	4.96491	5.14732	5.12845	5.16409	6.62757	6.68838	6.90642	5.20812	4.88104	4.92507	4.46171	4.81185	4.59799	4.05286	4.46591	5.07184	5.7281	4.87056	4.63364	3.61885	4.17028	3.76143	3.31693	3.65869	3.38193
Peak_10869	Chr4	14259130	14259775	AT4G28900	2.20614	3.44534	3.36391	2.62345	2.49622	2.36899	2.13998	2.13743	1.63615	1.48857	1.76847	0.98729	1.03818	1.03818	0.893142	1.04582	1.12979	1.03818	1.16795	1.40205	0.460566	1.08398	2.07382	1.16796	1.29773	1.4733	1.03818
Peak_10878	Chr4	14321740	14322581	AT4G29070	5.29058	6.51464	6.86994	7.80507	6.01291	8.0081	7.11983	6.74891	6.67081	5.84892	5.59317	5.70445	6.4424	4.57801	5.86063	4.67953	5.91139	5.00555	3.68388	4.1817	4.55653	5.6576	5.64784	5.42528	4.77323	5.03093	5.07778
Peak_10907	Chr4	14535479	14537356	AT4G29670	6.24955	7.82944	8.43689	7.01893	8.68984	8.14016	8.57169	9.31393	7.76554	6.95065	6.9454	6.4141	8.42726	7.75504	6.89463	7.99049	7.28764	7.7673	5.31211	5.53269	5.17819	7.43994	7.21762	6.55327	5.93357	6.11563	5.35675
Peak_10915	Chr4	14579782	14581652	AT4G29780	4.95685	6.76844	7.45899	9.07466	8.38411	8.76189	9.43048	9.54557	9.13352	3.89818	3.71895	2.91243	5.81256	6.3353	6.03747	4.88392	4.811	4.70909	4.83472	3.95001	3.88851	3.2744	2.68664	3.31569	5.73525	5.06315	5.86703
Peak_10922	Chr4	14618374	14619579	AT4G29900	5.30483	5.74099	6.1867	6.63785	7.85502	7.07946	7.47747	8.94407	7.52926	4.98316	4.91364	4.40524	6.39388	6.46475	6.21395	3.68421	4.10129	4.23896	4.10129	3.6147	4.72691	5.68511	5.14809	5.11674	3.6147	3.95409	3.79325
Peak_10930	Chr4	14691623	14692514	AT4G30060	4.08736	5.70351	5.21147	6.86448	6.81472	7.42837	6.82946	7.77667	5.82697	3.89755	4.29744	2.95403	4.85028	3.39262	3.98784	4.00443	4.20161	3.58427	4.60519	3.66535	5.18383	5.99283	4.36009	4.41722	4.37299	4.02102	4.33429
Peak_10939	Chr4	14796622	14799584	AT4G30210	5.36464	7.04338	8.28385	7.79787	9.58645	9.0278	8.67941	8.46083	8.13184	5.39293	6.17516	5.89999	6.02371	5.65867	5.12498	5.56492	6.10637	6.22454	5.19876	4.84981	5.03677	5.74022	6.33771	5.60209	4.71167	4.2612	4.82984
Peak_10957	Chr4	14901116	14902182	AT4G30490	3.85605	5.99282	6.29939	6.11453	6.86786	6.41031	6.37334	7.65201	6.87864	4.6633	4.67101	5.1948	5.10545	4.68333	3.53561	5.07618	5.76019	5.12548	3.76207	3.45704	3.60493	4.33363	2.9656	4.28125	3.85913	3.22133	3.35382
Peak_10959	Chr4	14907031	14907616	AT4G30510	2.22725	2.61996	3.34929	4.49938	2.82754	2.88364	4.87807	3.53443	3.80371	1.57366	2.94255	1.86539	2.32543	2.27493	2.1459	2.08138	2.14871	2.40117	2.41799	1.72794	2.55825	3.24831	2.73217	2.71253	2.8584	1.95235	3.03792
Peak_10965	Chr4	14939109	14941107	AT4G30600	3.35501	3.89362	5.38857	5.48971	7.77325	7.47558	7.51012	8.38012	7.34647	4.06959	4.2324	3.93473	4.2357	4.06794	3.60663	3.14203	4.10988	3.55072	4.23569	3.44052	2.92412	3.68311	4.25132	4.05726	3.52275	3.05322	3.355
Peak_10966	Chr4	14944099	14944798	AT4G30610	1.9021	1.90445	3.46135	3.56233	3.99206	4.10008	2.66294	2.15571	2.40228	1.19762	1.67901	1.37843	1.19762	1.19762	1.47706	0.958094	0.718571	2.03595	2.43046	1.68136	1.00036	1.85278	1.91619	1.98898	3.71261	2.63476	3.1138
Peak_11042	Chr4	15347005	15347843	AT4G31700	5.46624	7.38432	6.92586	5.91098	6.87687	6.56144	5.66804	5.74836	5.97759	2.9212	5.60338	4.40433	3.59909	4.20449	5.19782	4.79814	4.91177	4.60809	4.24172	4.29658	3.90473	6.13433	6.38903	5.3957	4.24172	5.89531	4.49642
Peak_11048	Chr4	15383149	15384805	AT4G31800	4.1179	4.44726	4.5286	5.64761	7.11283	6.25671	5.21112	6.24977	6.0712	2.05945	5.43234	4.58713	1.82136	1.82136	2.2767	2.37789	1.92354	2.12591	7.9124	3.49293	1.97711	3.6586	2.7499	3.78855	3.89569	3.82823	4.1427
Peak_11053	Chr4	15410093	15410767	AT4G31870	1.75337	2.73234	4.05468	4.38344	2.23555	2.85654	1.94332	3.50919	3.6139	1.09342	0.377462	0.545494	0.708656	0.124197	0.708655	1.22249	0.248395	0.881558	0.698914	0.852334	1.20788	1.4855	0.372592	0.869382	2.23555	1.15431	1.73876
Peak_11054	Chr4	15411884	15412282	AT4G31875	2.5213	2.50482	3.60892	3.2299	3.13514	2.94151	1.87862	2.01869	1.57787	1.90333	0.420216	2.28235	1.29773	0.609726	0.543809	1.71794	0.795116	1.74678	1.26065	2.02281	1.62319	0.440816	0.840433	0.840433	1.41308	1.67263	2.04753
Peak_11062	Chr4	15469785	15470419	AT4G31985	4.73722	4.35669	4.76569	4.92878	4.1936	5.19023	4.17289	5.08669	5.16952	4.27126	4.49388	5.16434	3.86485	5.71831	3.74577	3.1685	4.09265	3.43772	3.55679	3.20992	3.88814	3.98651	4.22467	4.06417	3.02095	4.75275	3.36265
Peak_11070	Chr4	15500989	15502656	AT4G32060	7.62568	10.2431	12.7512	9.63213	10.3663	10.2412	12.6339	11.4592	12.2486	9.22315	13.1316	10.9793	10.4521	12.5679	11.7391	9.77798	8.78166	9.26849	7.32905	8.32241	8.24653	9.08519	10.7556	10.1801	7.03636	8.64369	7.0541
Peak_11079	Chr4	15544776	15545861	AT4G32190	5.24923	7.3471	7.78454	8.17959	8.83044	8.0706	8.99543	9.33145	8.06606	6.61602	7.22298	6.2134	6.21794	6.01814	6.09836	6.53126	5.81835	5.71239	5.87586	7.12459	6.94145	8.19927	9.06354	7.61198	6.54488	6.99746	7.41067
Peak_11103	Chr4	15676416	15677414	AT4G32480	2.18349	3.76969	4.07245	5.27362	4.06587	4.00169	4.47558	4.82935	4.16953	3.52452	1.59113	2.55865	3.04076	3.23163	3.10493	2.09793	3.20531	2.14236	2.09793	2.09793	1.63062	1.00701	1.08434	1.59443	2.44676	2.13742	1.61252
Peak_11125	Chr4	15804791	15805709	AT4G32770	6.63239	5.48407	8.21894	9.47996	8.68399	8.79847	8.51408	8.56774	6.52328	5.62179	4.64875	4.31606	4.5951	5.747	4.96356	5.65578	6.55548	4.65233	4.87234	5.24438	5.82391	6.78443	6.35694	6.568	5.97237	5.45187	5.03868
Peak_11150	Chr4	15973658	15974673	AT4G33110	2.4673	3.96063	4.94755	4.53174	4.03828	5.77105	4.20816	5.57367	5.35525	3.1177	2.5579	3.019	2.65983	2.31036	3.14844	1.83308	2.69543	1.38331	1.93663	3.71308	3.69367	2.39288	2.80544	2.5579	1.77484	2.92679	1.98678
Peak_11178	Chr4	16135387	16135693	AT4G33560	2.07749	1.63843	1.62237	1.63843	3.36789	1.4778	1.63843	2.17387	2.45765	1.09229	1.53135	1.09764	0.942368	0.546144	0.530081	1.64379	1.36536	1.103	1.91151	1.00662	1.5367	2.46301	2.46836	1.91151	3.41073	2.23277	3.94616
Peak_11222	Chr4	16354901	16357207	AT4G34150	5.28407	8.41703	10.4206	9.78649	12.0544	10.0188	10.8197	9.3376	10.3722	4.03359	4.50599	3.86899	4.56798	5.55197	4.77105	4.79171	4.79955	5.03183	3.29114	3.32534	3.07952	2.79808	2.61638	3.01611	4.16754	3.76283	3.88823
Peak_11224	Chr4	16370620	16371503	AT4G34180	5.87785	6.83362	6.21813	6.63652	7.49932	7.56254	7.2892	7.583	7.0642	7.42122	7.477	8.18547	7.14044	6.63837	6.66255	5.43715	6.45243	5.43343	6.15305	6.24044	5.6826	6.5733	7.46585	6.45429	4.36236	5.3107	4.58178
Peak_11229	Chr4	16389547	16390456	AT4G34240	5.42089	5.44076	6.50651	6.10008	7.2146	6.88043	6.80818	7.724	6.77024	6.0784	4.72183	6.32226	5.40102	5.53649	6.19582	4.75254	6.14163	4.10225	4.57551	4.52674	4.54119	5.03614	5.43534	5.34322	4.42197	4.11128	3.78432
Peak_11231	Chr4	16397984	16398970	AT4G34260	5.32275	7.04648	8.16565	6.85662	6.75835	6.73337	8.85181	9.02668	8.76187	5.59088	6.98818	6.65842	5.05794	5.84236	5.07293	4.09698	4.88473	4.26186	4.52	5.14454	4.88307	5.2095	5.28277	5.19617	4.4284	5.21116	4.61993
Peak_11238	Chr4	16430139	16431206	AT4G34350	8.10813	10.1598	11.1002	9.42408	9.25785	9.36713	8.78842	9.2794	9.17628	5.22688	7.16156	6.61671	4.07099	3.92477	3.38916	5.51008	4.46193	5.92564	5.90101	4.62508	7.07691	9.41946	10.7462	8.19894	7.43091	9.34405	7.88033
Peak_11240	Chr4	16441139	16442305	AT4G34390	4.80741	6.13287	6.75545	7.79215	9.23028	7.58227	8.51052	10.0839	9.6444	5.96243	5.80185	5.62297	6.52304	5.96665	5.65959	5.82439	5.64973	5.7103	4.7398	3.60873	5.399	5.3159	4.49471	5.50042	5.69198	4.68205	5.50465
Peak_11241	Chr4	16451877	16453275	AT4G34410	1.43817	3.32048	4.4367	4.29923	4.77039	4.93136	6.05817	5.00069	5.96064	1.04455	0.479389	0.779007	2.63664	1.73779	1.68726	1.77186	1.81299	1.79889	0.359542	0.760208	0.820131	0.479389	0.239695	0.626261	1.44874	0.779008	1.20905
Peak_11287	Chr4	16700708	16703362	AT4G35090	8.18551	10.4788	12.2334	11.0409	10.0231	10.4955	10.4497	8.52356	9.069	5.27312	6.82714	6.63087	3.52656	3.19471	3.84603	10.6682	11.3239	11.9114	7.99791	5.52697	6.33926	9.84664	8.48703	8.73839	12.798	9.11421	12.8575
Peak_11294	Chr4	16772259	16773443	AT4G35250	8.61151	10.4412	12.6038	9.79754	12.0697	12.0877	10.1554	11.1195	9.83914	9.47293	8.50053	8.56712	8.04971	5.98561	7.77505	7.38526	7.44907	8.46031	7.64465	7.25764	8.86952	9.65882	10.2553	10.1096	8.60318	10.1873	8.14681
Peak_11317	Chr4	16896196	16897511	AT4G35600	7.08853	8.01659	7.64437	8.64738	10.6184	8.66361	7.63063	8.97714	7.68933	5.41601	7.90917	6.88867	7.27714	6.76251	7.33334	5.92439	6.1792	7.13474	6.11549	5.68081	5.35605	7.45326	7.74554	6.11549	6.60888	7.92916	5.58963
Peak_11363	Chr4	17179809	17181411	AT4G36360	5.73839	7.16069	7.12069	7.54215	8.10614	8.20971	7.2417	6.94534	7.11248	6.42646	6.88073	6.31776	4.24739	4.75909	4.97853	6.59874	6.64386	6.24804	4.5058	6.17728	5.38666	6.65822	6.74641	7.38423	4.81139	5.12005	5.12517
Peak_11370	Chr4	17225907	17226577	AT4G36500	3.85347	3.30963	2.74863	3.43701	2.62369	3.70648	2.28073	3.5399	2.66779	3.55705	1.13669	2.21458	1.60704	2.80497	1.74913	2.24888	1.41596	1.36942	1.98185	2.10679	1.74913	1.37432	2.67759	2.12394	3.34637	1.92061	3.49825
Peak_11375	Chr4	17246829	17248600	AT4G36550	4.5065	4.47218	4.29778	5.8553	6.54732	5.63916	7.04918	6.92302	6.48146	4.54268	5.90261	4.74027	5.06216	4.96754	5.01485	4.82562	5.08814	5.58257	4.30242	3.51763	3.39147	5.20409	4.39426	4.38406	3.45362	3.56773	3.23841
Peak_11385	Chr4	17311365	17312604	AT4G36730	4.93534	6.62553	8.51986	9.4319	8.52914	8.37271	7.84246	9.39213	8.1805	5.48283	8.57023	6.88005	6.80714	7.10143	5.88715	5.45897	6.55792	6.76737	4.78422	3.92123	4.70733	5.59551	6.35775	5.16468	4.10417	6.76074	6.55792
Peak_11420	Chr4	17504456	17505890	AT4G37180	3.0917	5.61408	6.83518	8.08378	6.65877	7.06542	7.6588	8.50761	8.79054	8.04139	5.14099	6.95202	6.25098	5.96346	6.5385	5.26242	5.34031	6.09176	4.73663	6.75614	8.29569	5.32313	4.55564	5.78247	4.08828	4.26469	3.4468
Peak_11443	Chr4	17639269	17640758	AT4G37540	8.21122	7.47538	8.80034	8.38332	10.0227	9.32767	6.56302	6.63914	6.71416	6.27618	7.12896	6.36113	6.15483	6.99106	5.73781	5.80842	6.50345	6.13718	7.67616	6.13276	5.73781	8.43959	7.46986	7.77545	7.69491	8.93383	7.25804
Peak_11444	Chr4	17643464	17644779	AT4G37550	8.22019	6.43401	5.28735	4.8914	8.76853	8.85472	7.00734	7.95289	7.23716	3.94959	5.4947	5.44848	3.94959	3.28882	3.96458	3.88589	4.97259	3.50367	4.07699	4.01329	4.08074	6.76002	7.36707	5.44973	6.86119	7.71931	6.89741
Peak_11445	Chr4	17646322	17647572	AT4G37553	4.53849	5.02597	5.6961	5.4793	5.76311	5.83932	6.0246	5.54105	5.5555	3.67389	3.88149	4.9445	3.42817	3.97347	3.60819	4.62521	5.42542	5.24278	3.27706	3.35722	3.6187	5.61201	6.23221	5.96416	4.93268	5.53974	4.28883
Peak_11447	Chr4	17665135	17666479	AT4G37590	3.5259	3.3658	3.30347	4.0282	5.26868	5.03769	3.51245	4.22374	4.3924	2.85494	3.39635	2.46751	2.30619	2.43085	2.47118	2.53596	2.48585	2.76572	2.55551	2.85616	3.53812	3.76177	5.06091	4.72116	4.18097	3.609	4.01231
Peak_11449	Chr4	17670548	17672346	AT4G37608	7.12248	9.96233	10.3022	10.7536	11.1666	11.0743	9.26516	9.05592	9.84537	5.41929	4.64445	5.4732	4.27897	4.80892	5.29959	6.66379	5.16163	6.28733	5.20274	3.39631	2.91569	4.05419	3.21539	3.77825	8.66758	7.36096	8.44371
Peak_11460	Chr4	17743838	17745298	AT4G37760	5.81908	6.74167	7.97592	8.34383	7.54275	7.79815	7.7554	7.78128	8.98739	5.21489	3.90189	4.75585	3.78375	2.82065	3.5576	4.00202	4.30355	3.93339	3.89064	4.65459	6.12736	4.28105	4.67259	5.13951	5.23064	6.56053	5.7617
Peak_11536	Chr4	18161171	18162412	AT4G38960	6.53942	8.0813	10.3961	9.1004	8.26526	8.11968	7.69484	8.09454	6.72868	4.5224	2.63244	3.71242	1.90717	2.83494	2.44451	2.69994	3.77992	3.10493	3.0242	4.60578	3.91491	5.46077	5.19077	5.19474	6.07487	7.01456	6.74985
Peak_11553	Chr4	18257263	18258067	AT4G39200	6.56086	6.665	6.67317	7.60227	7.65944	8.319	7.60227	6.87328	6.14429	5.37039	6.84469	6.46284	6.09529	7.18774	5.74815	3.34067	5.41327	5.51129	5.27033	4.69858	5.82371	6.41384	7.33477	7.71458	6.16063	7.62473	6.8692
Peak_11555	Chr4	18263519	18264281	AT4G39220	6.09473	4.22473	5.82328	6.67426	7.15683	7.21715	9.13886	6.24123	8.42791	5.7608	7.89147	8.34605	6.59239	7.89363	6.12704	5.41395	4.77841	4.94429	4.45094	5.16404	5.43118	7.48861	7.14176	7.19992	5.38378	5.78235	4.78056
Peak_11563	Chr4	18291189	18292833	AT4G39330	2.50515	2.9798	3.41448	2.26433	2.66803	2.63606	2.21637	2.90486	3.49242	2.717	2.23135	2.27132	2.35427	2.17939	2.60508	3.32355	3.15368	3.00678	2.62806	3.18765	3.41748	3.51941	3.37052	4.10897	3.14668	2.79694	2.64605
Peak_11581	Chr4	18400344	18401583	AT4G39640	2.97473	2.59427	3.06885	3.74095	4.88762	4.08031	3.53149	3.04234	3.47051	2.3477	1.91687	2.50147	1.8824	3.25046	3.42014	1.9858	1.72996	2.43387	2.35035	1.41976	1.59474	2.29865	1.81612	1.86384	3.37639	2.25226	2.46436
Peak_11587	Chr4	18458086	18459091	AT4G39780	5.7598	4.57026	4.45915	5.24509	5.20587	4.53104	4.27124	5.79901	4.42483	5.07679	2.25	3.99672	3.62418	3.91666	3.6781	4.78921	5.15686	4.47058	4.83332	4.04248	5.09966	6.14052	4.89215	5.30718	5.63724	5.55555	5.77613
Peak_11597	Chr4	18505941	18506710	AT4G39890	2.03232	3.45196	3.11039	3.78712	6.82279	5.7127	5.30922	4.4852	4.95058	2.10277	4.197	3.51813	2.75815	2.53399	2.06861	2.48917	3.44342	2.59804	2.39523	1.79322	1.78468	2.76028	3.15522	2.28636	2.38029	3.42847	3.26623
Peak_11623	Chr5	35971	37913	AT5G01100	3.10061	3.47793	2.5947	3.54307	6.43387	5.78329	5.37552	4.56758	5.28669	1.52281	2.30367	1.90859	1.59641	2.07102	2.0854	2.09894	2.01688	2.36205	3.0287	1.63956	1.48558	2.71652	2.20046	2.26222	3.66743	2.81043	3.56422
Peak_11653	Chr5	228149	229661	AT5G01595	1.79155	2.21309	3.06594	2.64766	2.34563	2.73458	6.02216	6.21446	5.47241	3.23108	2.99967	3.04421	3.5505	2.65961	2.93665	2.33368	2.34998	2.05664	2.52598	2.88994	2.97359	1.85782	2.73241	2.96382	3.2137	2.58791	3.18328
Peak_11668	Chr5	309604	310851	AT5G01810	4.29914	3.96327	3.6274	4.46773	4.81414	4.44139	4.68111	5.51749	4.51383	2.70408	4.44402	3.29153	2.12718	3.00703	2.8055	2.35109	2.82658	3.26255	3.99093	4.0963	2.80023	3.56681	2.25626	3.38505	4.46378	5.83888	4.15952
Peak_11672	Chr5	332273	333171	AT5G01850	6.29357	5.89862	5.94616	6.63184	5.43053	5.28974	4.55836	5.21112	5.11787	4.5419	5.18186	5.14529	3.93303	5.3574	4.2914	4.54373	4.50716	3.91657	4.89297	4.84177	4.92953	6.45813	5.24403	4.81069	4.12684	4.66441	4.58761
Peak_11691	Chr5	418987	420017	AT5G02120	5.36663	5.6281	5.29488	5.53882	8.40548	7.67686	6.82547	6.13352	6.17018	5.18008	5.38895	4.47059	4.09592	3.96199	4.15172	4.06563	4.77671	4.14694	3.91416	3.55543	4.33826	5.31561	4.10389	5.15777	5.61056	5.92784	5.204
Peak_11708	Chr5	533026	533745	AT5G02450	5.06378	4.12317	5.19163	5.09346	6.4747	6.0706	5.12314	5.70532	5.12314	2.4634	5.37199	4.03641	4.07066	4.41996	3.80811	3.38803	3.26018	2.79444	2.97023	3.21908	4.23504	5.55007	5.52724	5.47016	3.6346	5.35601	4.30353
Peak_11738	Chr5	688139	689775	AT5G02940	2.5907	3.59384	5.06191	4.82794	4.07985	5.6674	6.81314	6.6595	7.54214	4.39716	3.64304	4.46243	5.11713	5.98572	4.66024	5.07195	5.04182	4.99362	2.69814	4.75263	3.84689	2.91102	3.07269	2.86784	2.94717	2.3236	2.89897
Peak_11768	Chr5	817790	819100	AT5G03360	3.89068	3.82297	3.81419	3.00546	3.35904	4.66053	2.366	2.45377	2.30206	2.71457	4.35334	3.61232	3.47691	3.06439	3.13335	3.38789	3.23241	3.89945	4.94014	2.30206	1.68642	4.90378	5.15079	4.54644	5.63602	5.07681	4.53013
Peak_11771	Chr5	832611	834491	AT5G03380	6.44844	6.17404	5.83584	6.83558	8.17437	6.64069	5.20926	5.52649	5.80525	6.19064	6.53757	5.97217	5.18043	5.37443	4.63249	5.21451	6.02985	5.72836	6.06742	6.45018	6.81897	5.85944	6.52622	7.16241	6.46242	6.48689	6.1015
Peak_11785	Chr5	898436	900183	AT5G03555	10.9131	9.28158	9.55335	11.2084	10.8464	11.3307	5.54356	5.95921	4.85895	2.47979	2.14501	3.74742	1.21874	0.697763	0.552004	2.68573	2.68573	2.58981	4.38312	2.76002	2.2541	9.5919	8.53585	8.0478	10.8106	12.5297	11.3213
Peak_11791	Chr5	947181	948070	AT5G03668	4.43823	5.05511	4.44931	5.33585	4.46778	5.08466	5.14931	4.39575	3.95617	3.56092	3.62003	4.26092	3.23586	3.24879	2.3955	3.93216	4.40868	4.05037	4.04667	4.69126	5.65167	4.22398	4.20736	5.16039	5.70154	4.42715	5.73479
Peak_11846	Chr5	1301710	1302554	AT5G04540	7.221	7.14319	6.42926	7.19377	7.21516	7.78319	8.82394	7.50502	8.53213	6.19776	8.83171	7.99134	6.62379	7.3416	6.25028	5.15897	5.05198	6.27752	5.86706	5.02279	5.93903	7.03425	9.70127	8.03025	6.3495	5.63752	7.13346
Peak_11847	Chr5	1304985	1306095	AT5G04550	5.78655	7.71442	6.64174	8.92765	7.04861	7.69813	8.8522	7.67447	7.94078	4.87662	7.31345	6.41684	5.81022	6.48934	7.16254	5.85017	4.41056	5.5513	4.8781	5.70517	5.44625	6.11205	5.86201	6.15348	5.356	7.1078	5.81466
Peak_11849	Chr5	1319225	1320763	AT5G04590	7.56527	7.21067	7.357	7.51294	10.6488	8.97301	7.15192	8.27235	8.24885	6.70012	8.59918	7.4873	4.79679	5.77408	5.66194	5.68223	5.87449	6.29638	7.85579	6.11694	5.90973	8.46033	9.74418	8.73483	6.12335	8.5618	6.06888
Peak_11871	Chr5	1418851	1420497	AT5G04870	5.97533	6.05916	7.02428	6.92348	8.20596	8.37863	5.94339	7.94448	7.4205	5.88849	7.19594	6.98735	6.80571	6.08311	6.67496	6.37854	5.81664	5.8376	5.0641	4.27564	3.76664	6.5003	7.07119	7.17698	5.26371	4.76469	5.37649
Peak_11879	Chr5	1457939	1458496	AT5G04950	2.64538	1.79108	2.01791	3.43192	2.99888	3.39657	1.28439	2.08567	2.25358	2.48041	1.12826	1.05167	1.50239	1.35215	0.751193	0.969187	1.67914	1.22842	0.450716	2.49219	2.30366	3.15501	1.80287	1.70271	2.9164	1.9531	1.50239
Peak_11888	Chr5	1519747	1521387	AT5G05140	7.24429	8.57855	7.17317	6.20152	9.58225	10.3295	7.2523	8.91412	7.95149	7.62393	7.85031	8.55851	6.94779	7.04996	6.1304	6.84561	6.84561	8.0146	6.07931	5.67863	6.03223	7.3114	7.16716	7.15213	7.31641	6.15444	6.93977
Peak_11895	Chr5	1564010	1564435	AT5G05270	1.80585	3.61556	2.96731	3.26828	3.24127	2.26503	1.06113	0.829612	1.20776	0.196791	1.7364	1.00711	0.111901	0.914502	0.621244	1.34667	1.57819	1.99879	1.53575	0.787166	0.91836	2.41552	0.567223	1.35439	1.37368	1.39683	2.35764
Peak_11903	Chr5	1609177	1610286	AT5G05440	8.0057	5.37119	3.74813	4.3553	5.15794	5.46004	4.1613	5.84211	5.21421	3.30535	7.21045	5.01281	3.61782	3.13949	4.47081	2.86997	5.84063	3.44307	6.68178	5.53557	6.12052	7.02831	7.53033	7.5096	8.08122	8.56844	8.48254
Peak_11932	Chr5	1765420	1766329	AT5G05860	6.84972	3.86923	2.97869	3.70485	7.27241	4.90607	4.79047	3.65246	4.52132	3.63982	5.21135	4.53938	2.51265	2.49639	3.13223	2.84683	3.06178	2.85947	5.11922	3.51879	2.75651	7.95883	7.06649	5.64127	6.54083	5.95738	5.0542
Peak_11959	Chr5	1930255	1931833	AT5G06310	4.94906	6.20559	6.1577	7.28306	7.77025	6.99573	7.45066	6.0994	5.85476	3.58947	4.22346	4.60552	4.73565	5.47374	4.94906	5.57264	4.76272	4.17974	4.27447	4.18599	3.03252	3.18243	3.08874	3.59572	5.06149	3.71648	5.02193
Peak_11972	Chr5	1993650	1994944	AT5G06530	6.44949	5.60285	5.53811	5.91891	6.43299	7.34056	3.49575	4.62927	4.26242	3.02102	5.712	3.7915	2.00682	1.70472	2.07155	3.76866	3.92986	4.22181	4.8679	2.81538	2.98547	6.82395	7.96254	7.20855	7.67313	6.66909	8.07677
Peak_11995	Chr5	2154724	2155548	AT5G06960	5.14456	5.58888	7.01151	6.7485	7.22669	8.19503	8.203	7.36816	7.82443	5.85587	5.4773	6.48151	5.63869	5.18441	4.68629	5.52712	5.18242	4.88355	6.12087	5.10072	4.06464	7.18485	8.12131	6.28226	6.30019	5.89174	6.24639
Peak_11997	Chr5	2167529	2169057	AT5G06980	2.45224	8.04478	11.5979	9.97454	3.72836	5.86023	10.4981	11.5044	10.0896	4.71527	0.603116	2.1308	1.69969	1.20623	1.97384	1.20623	1.31589	1.1514	1.41265	2.9629	4.37125	0.493459	0.548288	0.43863	1.69969	2.24261	1.80075
Peak_11999	Chr5	2181529	2182536	AT5G07020	8.22384	8.57771	8.00695	10.4188	11.4951	10.3128	10.6455	11.0597	10.5623	8.94136	10.9553	9.93448	8.64294	9.89697	9.66704	9.15988	8.56629	9.02942	8.46029	10.1041	9.26751	8.56629	8.8158	8.4554	6.17399	8.14556	7.82267
Peak_12001	Chr5	2202265	2203002	AT5G07090	3.63505	6.25219	7.86257	7.35473	6.16977	5.73767	6.17646	7.02954	4.41462	4.32107	6.85357	4.967	5.54612	4.83559	5.40356	4.20302	3.78873	3.17621	4.19188	4.40571	3.67291	6.80235	4.41017	4.81109	5.45256	4.51708	3.81546
Peak_12040	Chr5	2528431	2529410	AT5G07920	2.68709	2.4053	2.38349	4.35101	6.51141	5.15948	7.15384	6.59193	6.47451	3.56937	3.00746	3.40499	3.83607	2.82295	3.99877	3.72033	2.81792	3.45028	2.1386	2.20066	2.97224	2.94037	2.71728	1.94739	2.30969	1.95074	1.71088
Peak_12108	Chr5	2875839	2877270	AT5G09250	4.55486	4.58929	4.85905	5.57534	5.99661	6.5476	6.80014	7.2593	6.06204	3.9281	5.03467	4.53534	3.57111	4.97613	4.03945	3.34153	3.46206	2.93058	4.07733	3.85119	4.65702	5.91971	5.12307	5.85428	3.83397	4.11636	4.35856
Peak_12169	Chr5	3239664	3240090	AT5G10300	3.23753	1.90171	1.33582	2.38677	1.93251	2.44836	2.06725	2.15964	2.05185	1.78237	1.37431	2.33287	1.29347	1.17798	1.96331	1.96331	2.30592	1.76698	1.88631	1.76698	1.75543	2.24433	1.37816	2.39832	2.69473	2.81022	2.78712
Peak_12171	Chr5	3245954	3246649	AT5G10320	2.09489	2.37121	3.04668	3.66074	3.2734	3.18602	4.01736	2.64754	3.21672	2.71367	2.83176	2.76326	3.1317	2.82467	1.90122	1.82328	2.43262	1.90831	2.18699	3.19783	2.63809	1.85399	2.31689	2.10906	2.77035	3.36788	2.2791
Peak_12224	Chr5	3488409	3489054	AT5G11020	2.1756	2.09927	2.52675	3.61837	2.74558	2.084	2.44787	2.33591	2.51403	1.93896	2.00257	1.41987	1.6158	1.69213	1.72521	1.61325	1.16796	1.4275	1.29773	1.65142	2.55474	2.82192	1.65142	1.53692	2.35372	1.4962	2.51912
Peak_12236	Chr5	3593852	3595056	AT5G11260	7.24768	7.17811	7.13036	8.90374	8.94603	9.5558	6.74567	6.27914	6.80023	5.14553	6.33097	5.58342	5.56024	5.33924	4.03512	6.29824	6.10998	6.48649	6.32006	5.63526	3.82641	9.22977	9.60628	8.73459	5.9572	8.69094	6.25049
Peak_12252	Chr5	3695855	3696929	AT5G11530	3.48636	3.11326	3.26464	3.44202	3.81512	4.49557	4.3289	5.19284	5.10874	3.44813	4.26926	3.29063	3.92827	3.54599	3.27993	3.12243	2.7845	3.11938	2.53373	1.55969	1.9649	4.84421	3.89005	2.72945	2.18662	3.44508	2.40375
Peak_12261	Chr5	3744866	3746673	AT5G11650	7.51161	10.0282	10.7846	10.7783	10.9983	10.6183	10.5192	11.5629	10.3255	6.17693	7.83618	6.21785	5.34504	4.94409	5.19321	5.7178	5.61052	6.36695	5.30412	4.77408	6.02874	6.35241	7.24885	6.90882	5.51778	6.38968	6.44514
Peak_12264	Chr5	3761172	3761816	AT5G11690	2.71671	3.13976	3.24935	3.79218	3.4201	3.90177	4.93901	4.2713	4.59496	3.53988	4.08526	3.95528	3.24935	3.53988	1.42971	3.50165	3.5042	4.19994	3.11937	2.92314	3.08879	3.6826	3.34874	2.87982	3.26974	2.46951	1.84002
Peak_12319	Chr5	4046358	4047509	AT5G12470	6.07859	7.1559	8.02489	9.69721	8.58423	9.28341	7.4741	8.46865	7.99492	5.89452	3.97962	4.17368	4.07523	3.74704	3.68853	5.1454	4.58463	4.79581	4.52898	4.6574	5.31092	5.62627	6.29976	6.68217	5.89452	7.20442	7.13164
Peak_12325	Chr5	4073230	4074710	AT5G12900	3.87028	3.39302	3.65385	3.42743	3.69159	3.55618	4.64279	3.63609	3.73709	3.13996	4.35199	2.96459	3.56728	3.71045	3.66939	3.25983	3.66273	3.42299	2.32084	2.89799	2.58722	3.79259	2.81253	3.16993	3.28314	3.50179	2.60387
Peak_12330	Chr5	4107597	4108285	AT5G12980	4.05579	3.87686	4.25381	4.98147	5.628	5.47054	5.75684	5.06258	5.93815	5.28446	3.52854	3.61442	3.91265	4.92182	5.14847	3.1158	4.80969	2.88677	2.9154	3.66214	3.65021	3.98661	4.75959	3.95559	2.92017	4.6236	3.77188
Peak_12336	Chr5	4147528	4148414	AT5G13070	4.66636	5.05182	5.57999	6.19154	7.68707	7.92613	7.8446	6.67338	7.47395	5.31683	7.13111	5.5596	6.26011	5.69859	5.37057	3.57853	4.8906	3.68602	5.25011	4.21788	4.80164	7.03104	7.14224	6.03217	4.63115	5.38169	4.99623
Peak_12338	Chr5	4156543	4158058	AT5G13100	9.37155	9.76732	11.8372	10.5014	12.6624	12.6635	11.6659	12.1918	11.8318	9.29564	9.33468	7.7592	10.0091	9.25227	10.0362	7.68656	9.21866	8.94217	6.406	6.29757	7.79715	8.78169	8.94	10.0048	8.14738	9.67624	9.14709
Peak_12339	Chr5	4158650	4159618	AT5G13110	4.79057	4.24094	3.84229	4.56156	3.86095	5.32153	1.67263	3.91184	2.61411	1.91182	3.91354	3.34016	3.28758	3.15865	2.1069	3.53016	3.54712	2.59546	4.04416	2.58867	2.50894	4.21041	4.83298	3.17562	3.98309	4.78887	4.21719
Peak_12344	Chr5	4204424	4206460	AT5G13190	4.66023	6.91408	7.59435	7.27802	9.6513	9.26557	7.65488	7.82272	7.50962	4.2285	4.80144	4.40764	4.95558	6.04982	4.22769	5.1896	5.55677	5.17104	2.94946	2.8381	3.86617	3.41589	4.39877	4.07195	4.55532	4.54725	4.19783
Peak_12346	Chr5	4218882	4219935	AT5G13220	1.86993	2.57797	3.89425	3.71334	4.68027	4.32313	4.16874	4.79568	4.24359	1.11353	1.6703	1.27261	2.45789	2.03368	2.30661	1.84185	1.43169	1.62819	0.874919	1.24454	1.34591	0.589518	0.87492	0.636305	2.1834	1.04491	1.91983
Peak_12349	Chr5	4226895	4227664	AT5G13240	2.38243	3.89386	5.13204	5.54405	6.46841	7.0939	7.63828	6.63706	8.3022	5.3327	6.15887	5.53764	4.5407	5.98808	5.30922	4.6816	4.84598	5.33484	5.82797	5.33057	4.9335	6.08415	5.61663	6.36168	5.33484	5.91337	6.63066
Peak_12361	Chr5	4303585	4304335	AT5G13420	3.1278	2.06185	2.78415	5.19621	3.20659	4.30318	3.30728	2.67909	3.23286	2.23257	2.92861	3.57431	2.12095	2.04434	1.6022	3.37732	3.10591	3.03587	3.16063	3.08621	1.82765	3.79538	4.56146	3.39483	4.53081	2.19099	4.42137
Peak_12366	Chr5	4318435	4319154	AT5G13470	4.52955	2.83097	3.55698	4.52955	5.37884	4.54096	4.97931	5.91536	6.96327	3.68254	6.20986	4.77612	4.74187	4.84232	5.16652	3.80126	4.8195	4.7647	3.63003	2.7465	4.07522	3.47022	4.19166	4.79667	4.76927	4.3081	4.6574
Peak_12379	Chr5	4388600	4392369	AT5G13630	8.04977	11.3042	13.3238	13.9648	10.3838	10.9406	10.1845	9.90023	10.14	10.7029	4.43038	6.73168	6.38898	6.75784	6.19582	8.65496	9.01599	8.78359	5.12321	8.18885	9.82785	6.14524	6.4788	7.27933	9.16161	7.72842	9.11714
Peak_12391	Chr5	4445259	4446807	AT5G13770	8.17013	12.4128	12.8532	12.6452	12.7184	12.8532	13.9303	11.862	13.7966	9.90093	8.42375	9.24299	6.61654	7.68516	7.30207	9.16765	8.94905	8.46514	6.82453	7.75414	8.7888	10.1323	11.0969	9.40748	9.87015	10.1461	8.73362
Peak_12413	Chr5	4556054	4558491	AT5G14120	10.7487	8.00184	7.53055	8.10163	11.7216	10.2666	7.0923	7.52381	7.28984	7.55414	12.5839	10.9348	6.40053	7.10847	6.97902	5.72359	6.39648	6.28254	10.1938	7.84002	5.3858	10.8768	11.3568	9.81419	11.849	11.3953	12.5698
Peak_12441	Chr5	4690873	4692245	AT5G14545	2.84221	3.15828	2.25078	3.00024	2.69734	3.09602	3.52223	3.36659	2.88172	2.46149	2.33219	2.60995	1.34329	1.05116	0.653684	1.55879	1.58512	1.74555	1.94429	1.809	2.01493	2.93559	3.17145	3.16067	3.57611	3.65034	3.21454
Peak_12449	Chr5	4721831	4722223	AT5G14640	3.17465	2.71873	2.28374	1.58941	4.79334	5.0903	5.00665	2.42595	3.47161	1.14605	1.06658	1.71489	1.27571	1.98677	1.11677	1.91985	1.83619	1.70653	2.04532	0.907639	1.06658	3.8857	2.33811	3.17465	3.05335	2.44268	2.38412
Peak_12458	Chr5	4768404	4769855	AT5G14760	5.38986	7.25214	8.2597	9.66801	9.65895	9.19366	5.06269	5.27212	4.73438	2.97286	3.57965	3.24456	1.37775	1.50341	1.44341	2.57323	2.41021	2.45776	2.83248	3.23324	3.29097	8.14083	7.33592	7.42082	7.46837	7.25101	6.15628
Peak_12483	Chr5	4935602	4936547	AT5G15200	5.15204	6.02607	6.6464	6.51955	7.13466	7.3258	7.29627	7.16942	8.00521	5.18853	6.54561	5.38314	5.45092	4.947	6.64292	5.31364	6.4431	4.35969	4.01564	4.82016	3.32059	6.25543	7.13467	6.37359	4.51955	6.08862	4.69678
Peak_12495	Chr5	4984983	4986348	AT5G15350	7.38502	8.86274	9.7075	9.48608	9.90845	9.33806	8.36094	8.26106	8.15636	5.78334	8.40426	6.75084	6.15157	6.01439	5.47648	6.95542	6.71354	5.62932	7.76888	6.02883	6.28635	8.53302	8.5246	9.45118	6.56673	7.59079	8.28512
Peak_12500	Chr5	5017391	5018540	AT5G15450	7.36275	7.90591	7.79299	9.47823	8.0174	8.75067	7.82015	8.41048	7.2927	5.21724	6.21781	5.17293	5.94766	5.91335	6.63376	5.8719	6.88676	5.94909	4.40964	5.42736	4.77127	7.50854	7.04828	8.5234	6.59659	7.01826	5.96909
Peak_12511	Chr5	5078145	5078899	AT5G15600	2.90439	4.01259	5.14691	6.16802	4.10185	4.58519	5.29061	5.72822	4.25861	3.74479	2.73021	3.13735	2.35791	2.99801	2.44282	2.33179	2.56475	2.55386	2.90874	3.15912	3.47917	2.22075	2.22075	2.22075	2.39057	2.4929	2.40581
Peak_12514	Chr5	5092019	5093675	AT5G15650	5.05934	6.41742	7.69019	8.69909	9.57305	9.90142	9.40243	9.54529	10.1673	6.04541	8.50167	6.39857	6.10196	7.216	6.72892	5.01073	5.36687	4.95815	6.18628	5.62975	5.65852	7.45905	7.12176	7.41739	5.16647	5.3629	4.49289
Peak_12527	Chr5	5175879	5177661	AT5G15845	11.1783	11.0041	10.2785	10.2269	12.5243	12.8553	8.23831	8.74536	8.59601	6.2617	4.92675	5.61543	1.83094	1.96001	1.64563	4.13759	4.44275	4.07121	5.33793	5.45317	5.03277	11.2853	10.0305	10.9331	13.4204	11.8956	14.1524
Peak_12528	Chr5	5180587	5181495	AT5G15860	4.61129	4.28579	6.36358	5.25144	6.67823	7.89705	9.46851	7.83738	9.48117	6.86991	6.49197	7.39976	5.8482	7.13936	6.30932	5.53897	5.64566	5.63301	5.44132	5.0905	5.15741	6.62579	7.11224	6.54441	7.83014	6.28582	7.83919
Peak_12545	Chr5	5268337	5269041	AT5G16130	3.91012	4.51867	5.34173	4.51867	6.2324	5.97359	6.0622	7.02049	7.25598	3.56271	4.74717	4.75183	3.91711	4.26219	4.39976	2.87022	2.73499	4.17826	4.50001	3.89146	3.44846	4.85442	3.47411	4.67489	4.64924	5.29743	4.37411
Peak_12555	Chr5	5311166	5311879	AT5G16260	5.55757	4.73338	5.47699	7.61116	9.4207	7.9726	6.63041	7.30726	6.66033	6.91818	6.88135	5.98118	4.31207	6.39328	5.35267	5.26749	5.96276	5.55987	4.90143	4.8623	4.7656	7.01488	5.36649	5.7924	5.75326	4.38574	6.07096
Peak_12564	Chr5	5362374	5363223	AT5G16390	7.82057	7.79156	8.19767	8.96929	10.6517	8.5651	9.7467	11.9339	11.5452	5.85769	8.8165	6.755	7.19013	7.65425	7.30229	6.89231	4.93137	6.53454	5.90797	6.58095	6.30248	8.3079	6.48813	7.96948	5.52313	7.39125	6.59836
Peak_12565	Chr5	5364537	5365452	AT5G16400	6.77435	8.38763	10.0494	9.63303	9.18081	10.8623	10.0458	11.2571	9.24361	7.98744	7.1817	7.27681	5.41768	5.44819	6.32571	6.0691	6.04039	5.56842	7.17991	5.02468	7.61957	7.29476	6.21446	7.67879	6.58951	7.71468	8.00718
Peak_12570	Chr5	5382047	5382878	AT5G16480	2.58818	3.49503	3.45354	4.36236	5.34231	4.25765	4.57969	5.2218	4.52042	3.47527	2.92207	3.12754	3.83485	3.15718	3.90795	3.37451	3.18484	3.91388	3.47724	3.22435	3.2935	3.80126	4.48091	3.39822	5.08744	4.43349	4.05415
Peak_12605	Chr5	5586102	5587132	AT5G17000	4.25695	4.46741	4.00185	4.67149	5.81942	5.73811	5.59143	5.59303	6.60704	2.68331	4.18998	3.60166	3.02451	4.22825	4.00504	3.74675	3.84561	4.06563	3.71327	3.11379	3.55702	4.4706	3.85039	4.83411	3.25888	2.51272	3.74037
Peak_12608	Chr5	5608053	5609559	AT5G17050	8.07714	9.25736	8.80251	6.84348	8.69997	8.1644	6.53589	7.05509	6.45299	5.22587	7.06491	5.22914	3.99003	4.26599	4.25291	5.684	7.12054	5.8967	6.11703	5.28804	3.87659	7.84372	7.2078	7.80882	7.87644	8.32802	7.96152
Peak_12614	Chr5	5660892	5662914	AT5G17230	7.83217	10.4453	10.2804	11.4911	12.081	11.448	11.2993	11.2327	10.8158	8.08081	9.96917	8.66828	7.89067	10.2974	8.5334	9.64009	9.62466	9.07293	7.50065	6.4232	7.27313	10.4429	11.4943	8.96974	7.85492	9.44833	8.96973
Peak_12621	Chr5	5690711	5693027	AT5G17300	10.3416	8.56019	8.336	9.02346	12.3536	10.9822	6.04023	5.7075	5.45919	3.21308	3.28687	2.90802	1.08545	0.935051	1.3366	2.30357	2.7037	1.99355	2.83495	2.37948	2.36955	6.36374	6.59502	5.90047	11.0617	12.1982	11.9698
Peak_12623	Chr5	5718717	5719585	AT5G17350	5.85257	5.94147	5.24915	6.86079	6.00957	6.8778	5.6199	5.56505	5.24347	2.41177	2.82225	2.84873	2.50824	2.95844	2.89223	3.06437	3.18354	3.52213	2.23396	1.80646	2.27369	2.95844	2.21883	3.0133	5.15646	3.85884	4.89164
Peak_12638	Chr5	5820088	5821762	AT5G17660	5.29644	7.51334	7.86467	7.57517	9.07076	8.39558	8.91081	7.4574	8.63013	6.78026	7.85191	7.97556	6.4888	7.06682	6.54964	5.94119	6.94513	6.84209	6.30626	6.7518	6.50646	8.1581	7.67821	7.20716	6.98046	7.35338	6.55454
Peak_12679	Chr5	6061759	6062548	AT5G18310	3.36873	4.04705	3.8577	4.88143	3.79736	4.49649	3.97839	3.79528	3.91804	3.11487	4.40077	2.92553	2.72786	2.57596	2.4532	3.4686	2.71329	2.97963	3.28758	2.12236	2.3013	2.1286	2.95258	2.41366	4.68375	2.50522	4.36124
Peak_12684	Chr5	6094199	6095083	AT5G18400	4.99452	4.75306	6.10895	6.15724	9.83858	6.65873	6.57887	7.00421	7.18623	5.20997	7.35897	5.05024	5.27127	5.64274	5.53687	4.16798	4.91279	4.32772	4.21441	3.90609	4.45216	5.39943	5.35299	5.53316	4.45216	4.45216	5.49415
Peak_12689	Chr5	6130335	6131144	AT5G18475	4.68784	5.01254	5.49959	7.57766	7.01147	6.60762	7.07844	6.51225	6.82476	6.16319	5.65585	6.64821	6.96074	6.88767	6.03737	5.18707	6.01708	5.07139	5.13227	6.27278	6.06984	5.58888	5.25607	5.24186	3.51892	4.96181	4.84816
Peak_12700	Chr5	6202516	6203593	AT5G18630	4.93899	5.44372	5.96674	5.57638	5.13569	6.00028	7.93532	8.22657	7.18662	6.12532	6.02011	4.65232	4.46934	5.28818	4.50746	3.62152	2.91246	3.54375	4.42816	5.52148	4.5532	4.51051	3.67641	4.12625	3.23726	4.44646	3.5651
Peak_12704	Chr5	6225814	6228186	AT5G18670	13.0783	12.2297	13.0111	13.9982	15.252	15.4438	7.40848	6.32232	6.52528	3.56743	6.19486	5.11909	2.82624	2.61427	3.14419	4.41599	4.73395	3.85075	5.7827	5.10731	4.62796	8.51265	9.00101	8.54937	14.0127	14.2136	14.3598
Peak_12741	Chr5	6465179	6466975	AT5G19220	6.54314	9.96518	11.4068	10.5707	11.1973	9.57824	10.3384	10.7939	9.80693	9.64959	7.47617	8.1421	9.15289	9.8673	9.05318	8.16589	9.05044	8.84829	6.67486	7.73413	8.34792	8.39732	6.5715	7.9308	6.64925	6.65016	6.8267
Peak_12742	Chr5	6467585	6468401	AT5G19230	2.04015	3.68193	3.48878	4.9032	4.79455	5.85084	3.00791	4.15072	3.7624	1.32589	1.97778	0.98587	1.97174	2.4023	1.70817	2.34597	1.43655	1.69006	1.33394	0.923499	1.51905	1.02611	1.09049	0.9235	2.4023	1.4607	2.6035
Peak_12743	Chr5	6470094	6471404	AT5G19240	3.58348	5.37147	6.20276	7.01525	7.80141	8.51735	6.42846	7.50425	7.05036	3.28883	1.72654	3.28507	4.2731	3.74774	4.04114	3.58098	5.63728	3.6048	2.94151	2.26444	2.24062	2.06633	2.23811	2.30206	4.79595	3.63991	4.67433
Peak_12775	Chr5	6670557	6671039	AT5G19730	2.83154	2.6886	3.73001	2.47419	2.30743	3.43392	1.09246	0.874645	1.74248	0.633011	1.00737	0.364152	0.820193	0.347135	0.990357	1.47022	2.02155	1.51787	1.38854	0.844015	2.34146	1.29325	2.31764	1.16393	3.03233	3.77085	2.35167
Peak_12778	Chr5	6681145	6682052	AT5G19760	8.1067	8.40179	9.53687	7.80619	11.2205	9.51695	7.27214	7.16714	7.97635	5.05809	9.5948	7.97635	6.57878	7.29386	6.30179	8.53937	6.78516	6.66386	6.548	7.88403	7.67403	9.65998	11.1191	11.3599	5.12507	7.913	5.90895
Peak_12784	Chr5	6710774	6711798	AT5G19850	4.75977	4.54969	5.76369	7.31927	7.73462	6.95843	5.64341	5.87274	5.53435	3.64039	4.37809	3.86972	3.92585	3.10796	4.51601	4.89127	3.22503	3.85529	3.45917	4.49837	4.1648	5.56643	4.76298	3.90179	4.71647	4.65713	4.3845
Peak_12793	Chr5	6747479	6747948	AT5G19970	1.27656	2.46918	3.41698	2.3048	3.00079	1.54586	1.60532	1.86063	1.50389	0.891842	0.713474	0.870858	0.891843	1.07021	1.55285	1.31503	1.60532	1.50039	0.702982	2.36775	1.54586	0.713474	2.08796	2.40623	2.99379	2.3013	2.67553
Peak_12803	Chr5	6779717	6780992	AT5G20070	12.2447	13.3448	13.8253	13.0473	13.8189	13.207	13.1323	13.1658	13.3036	12.1468	11.9574	12.0334	10.4218	11.6147	9.51104	10.5133	11.8917	9.61282	8.65436	11.2347	10.4321	10.159	12.6002	12.4302	11.2347	12.483	10.3149
Peak_12811	Chr5	6804507	6805253	AT5G20160	4.52867	5.31866	5.4991	5.69055	4.98198	5.86878	6.45853	5.67954	6.48053	4.2536	5.45729	4.33062	4.52207	4.60349	6.49593	3.86411	4.04016	4.6321	4.26461	3.57804	3.97854	5.25924	5.13602	5.27465	3.17315	4.52867	3.85751
Peak_12813	Chr5	6810046	6811432	AT5G20170	3.4452	4.71804	5.7503	5.07714	6.30138	6.21013	7.08358	6.73989	7.19261	5.13047	6.40331	5.6223	6.19354	5.31416	5.52156	4.56753	5.64482	4.71567	5.29283	5.13876	4.90292	6.21487	5.86763	6.1331	5.01077	5.89726	5.62467
Peak_12817	Chr5	6826557	6827705	AT5G20230	1.42633	3.71533	4.82836	2.77255	3.28328	2.63235	3.78401	4.49216	4.30618	1.5322	1.75108	1.39772	2.04293	1.60516	1.5322	1.67812	1.3362	2.3076	1.38628	1.45924	1.09443	1.24035	0.729619	0.802581	2.04436	0.802581	1.58942
Peak_12849	Chr5	7040223	7040659	AT5G20790	1.51214	1.34287	2.76849	3.98722	2.11022	2.83995	4.28062	1.41434	2.34719	2.49389	1.28268	1.60241	0.95919	0.383676	0.95919	1.72654	1.86948	1.98609	1.11717	2.0726	2.4638	1.60617	2.84748	1.91462	2.74592	3.9308	2.68573
Peak_12905	Chr5	7358740	7359269	AT5G22210	2.96192	3.44265	4.36069	4.31417	4.63362	5.08334	3.23485	4.19011	2.95572	1.63138	3.61633	2.83786	2.10901	2.15863	2.17724	2.84717	4.25524	2.85647	1.65619	1.92912	2.68589	2.67658	3.15421	2.11522	2.20826	2.09971	3.79622
Peak_12915	Chr5	7418131	7419162	AT5G22390	4.7243	4.64307	4.81987	5.04924	4.82783	3.72401	6.09094	3.89922	6.62294	4.29264	0.990733	2.92441	0.974805	1.21851	1.32682	1.13727	1.61512	1.44787	2.38286	4.09354	3.56473	1.98306	1.13727	1.82856	4.78642	3.88807	4.43918
Peak_12925	Chr5	7541141	7542023	AT5G22690	4.39337	4.66516	5.99061	7.16156	7.33654	8.14448	5.91987	7.26395	6.8004	4.36916	4.69122	4.57021	5.26832	6.24006	5.52894	5.91057	5.59037	6.20098	5.34278	4.02104	5.017	3.38066	3.83861	3.61522	4.27236	4.46224	4.62234
Peak_12928	Chr5	7559355	7560010	AT5G22740	1.53353	2.78392	3.57574	2.6912	2.98438	2.26271	1.61623	1.38319	2.11988	2.01965	1.53353	1.6037	2.01966	1.75655	1.4308	2.4732	1.78912	1.59618	3.81379	2.59598	2.30531	2.35292	1.93947	2.70123	2.04471	1.6037	2.0397
Peak_12943	Chr5	7676945	7678221	AT5G22940	4.26716	4.07021	4.35598	6.5301	6.52366	6.42969	3.91317	3.57849	3.41372	3.3854	3.54502	3.37511	2.429	2.85378	2.65426	2.9426	3.61067	2.56158	4.06506	3.52443	3.1846	4.35984	3.01983	3.78702	3.86811	3.74197	3.73296
Peak_12947	Chr5	7736745	7738669	AT5G23060	8.1438	9.9746	10.8242	10.2342	10.9352	10.2564	10.7132	9.18899	10.1471	9.49725	7.66475	8.96185	8.97637	7.85944	8.49134	9.23254	9.05834	9.07798	6.9244	6.9671	7.59643	7.66475	9.20607	8.16088	7.70232	8.62199	8.69884
Peak_12981	Chr5	7935310	7935990	AT5G23535	3.96827	3.34068	4.29413	4.77206	4.72619	3.43964	5.94033	5.01344	5.0786	3.19585	6.17205	5.35378	4.30861	3.93688	4.76964	4.45826	3.28758	2.92792	4.91688	3.91516	2.28103	3.15241	4.69723	3.6762	5.17274	5.38275	4.51619
Peak_12995	Chr5	8005196	8006140	AT5G23730	5.22534	5.48625	7.76147	10.0923	6.06549	8.6051	5.19229	7.53708	6.70387	5.19228	3.50675	4.65827	2.66137	3.465	3.70505	5.57323	6.20987	4.8096	5.43581	5.74543	6.18899	4.30168	3.32585	4.96442	8.6051	6.04462	7.15613
Peak_12996	Chr5	8008717	8009541	AT5G23740	7.29045	8.2847	8.5756	10.9765	8.95615	8.93424	7.43192	7.73079	8.04958	7.02545	7.28646	6.14079	6.39583	6.44166	5.99534	5.85986	5.6646	7.14899	5.7682	4.80185	5.14257	8.58755	6.74053	7.90613	6.19857	7.04538	5.4773
Peak_13015	Chr5	8120848	8122843	AT5G24030	2.05803	3.04216	3.82206	4.88278	4.24947	4.08065	4.74031	4.85395	4.065	1.75414	4.26265	2.43356	2.85604	2.62133	3.08663	2.26803	2.13133	2.44592	3.76605	2.40968	1.41073	1.53426	1.26002	2.05803	1.51202	1.70061	1.44614
Peak_13018	Chr5	8158829	8160389	AT5G24120	1.82596	5.39997	7.74297	6.28452	4.0247	4.37431	6.23608	5.7917	5.82118	2.72525	1.39632	1.57113	1.12148	1.49742	1.87335	1.42897	1.1278	1.53217	1.29102	2.09449	2.69577	1.61114	2.11134	2.15135	1.93337	2.21243	2.47042
Peak_13019	Chr5	8173326	8175545	AT5G24150	3.58005	5.6111	5.7503	7.12679	4.68257	5.22162	3.54155	4.14649	4.07097	2.68041	1.69932	2.1895	0.944068	1.24617	1.35575	2.81665	3.16244	3.31646	1.6238	2.21911	2.44051	3.04397	2.52048	3.12098	4.1998	4.66703	4.456
Peak_13022	Chr5	8188435	8189397	AT5G24165	5.50831	6.54272	7.60957	8.20358	9.84907	8.41524	7.92194	9.83372	8.61836	8.67128	9.52987	8.60471	7.84	7.6676	6.91654	6.52395	6.61271	6.95751	6.49322	7.70515	7.97997	6.01186	6.96434	7.01384	5.1362	5.53392	4.63265
Peak_13026	Chr5	8237528	8238335	AT5G24260	3.73514	4.24374	3.94265	3.45236	4.63434	5.87125	5.70647	5.1877	6.64025	3.17975	5.20397	5.23449	4.62621	4.84185	5.45217	3.74735	4.12371	3.55815	3.84093	3.90806	4.61603	4.56314	3.8389	3.61512	2.68336	3.22655	2.71184
Peak_13048	Chr5	8417515	8418993	AT5G24590	7.53876	8.64684	9.52042	7.66768	10.1261	10.9697	9.87607	10.8964	9.1203	5.83606	5.96387	6.17059	6.11281	7.1931	7.14197	6.68852	7.14198	6.68852	5.38482	5.61266	5.54487	6.50069	8.04334	6.00277	5.81605	6.21728	5.27146
Peak_13062	Chr5	8521829	8522834	AT5G24810	4.72222	6.62254	7.46731	8.4526	7.94116	7.23038	6.21731	6.77777	8.63234	4.64051	6.41665	6.82678	4.66013	5.49999	5.20424	6.49999	4.71568	6.38071	6.50652	4.58332	4.5196	6.16339	5.52941	5.67973	5.33332	6.18463	5.78594
Peak_13064	Chr5	8534552	8535156	AT5G24840	4.33634	5.35522	4.84986	5.54269	5.0645	7.11855	4.98842	5.58888	5.06721	3.6272	6.11326	5.06993	3.1001	4.57272	3.82554	2.68712	4.18691	3.76849	4.6977	3.59188	3.32561	4.85529	4.61076	4.24668	4.38253	3.65981	3.82826
Peak_13065	Chr5	8537327	8538242	AT5G24850	4.20997	5.59714	4.11306	4.49889	6.28623	6.05653	3.52087	2.53746	2.89637	2.82459	2.93046	2.70435	1.11261	2.01346	1.62225	2.92867	3.26245	2.99148	2.47107	1.83042	1.83042	3.56932	3.6411	3.70929	4.17946	4.00718	2.89816
Peak_13066	Chr5	8546440	8547771	AT5G24870	5.63479	5.82731	6.15187	8.32261	6.99967	7.34151	8.69777	5.1609	7.39828	4.92643	6.97869	4.99183	4.84622	5.41142	5.60147	4.53153	4.03173	4.05764	6.49	4.53152	4.21683	6.02723	7.91289	6.10497	4.92396	5.02392	4.80425
Peak_13090	Chr5	8855920	8856789	AT5G25440	3.63901	3.55399	3.28002	3.23278	4.59883	3.95076	2.69808	4.52892	2.98716	2.79444	4.61772	2.94937	3.32348	4.36832	3.48596	2.46379	2.31264	2.21628	3.05329	2.15204	2.01222	3.17988	2.53748	3.17988	4.09435	2.62439	3.27624
Peak_13106	Chr5	8976241	8976992	AT5G25780	4.83956	4.67999	5.05378	7.53695	7.30961	5.39696	7.63531	7.73368	9.666	5.79697	5.97403	5.77074	6.538	7.05605	6.87025	6.13142	5.75982	5.78824	4.9882	5.19804	5.53685	5.09312	6.69101	5.9959	4.57069	3.91711	4.41549
Peak_13109	Chr5	8987042	8987659	AT5G25810	2.35131	1.8885	2.23694	1.87254	2.28747	2.40451	1.31663	1.1065	0.957546	2.11724	1.91775	1.49218	1.35652	1.08522	1.47888	1.13576	2.04011	1.22087	2.4444	1.65177	2.81678	1.94701	2.26087	2.39653	2.4843	3.22108	3.46047
Peak_13111	Chr5	9036025	9036639	AT5G25900	3.10583	2.42425	2.45098	3.03366	3.39182	2.36812	2.99357	3.75532	3.25016	3.67246	2.40554	2.6755	1.3177	2.68084	1.47005	1.62241	1.86563	2.12223	2.62471	1.9084	1.33107	2.35743	2.75569	3.07375	2.31199	1.93513	2.45365
Peak_13116	Chr5	9096468	9098842	AT5G26030	4.41228	5.97993	5.70101	6.65613	10.2794	9.54574	6.92883	6.9406	6.80563	5.26843	4.19425	4.74449	4.27108	6.09274	5.43107	5.22413	4.76803	4.27939	2.53593	3.51598	2.8377	3.48622	3.52982	3.73054	4.13127	2.71658	4.56454
Peak_13121	Chr5	9157073	9157975	AT5G26200	5.17348	4.25055	3.81366	4.39982	5.12432	5.39009	2.98904	3.65529	3.27847	3.77543	3.80638	3.1292	1.50726	0.557031	1.33251	1.46175	1.39258	0.633487	1.2069	2.13529	2.83248	4.66195	5.27906	3.95201	5.50478	4.65103	4.84763
Peak_13143	Chr5	9409038	9410053	AT5G26770	3.4526	4.8893	5.63839	5.99756	5.44747	6.59457	5.94094	7.31292	5.96035	3.97195	5.70634	4.98475	4.75663	5.52675	4.62558	4.36025	4.12565	4.4557	3.28919	4.4379	4.87474	4.08844	3.96063	4.44114	4.83753	4.03181	4.37157
Peak_13157	Chr5	9514789	9515458	AT5G27030	2.19581	2.07804	2.25224	5.82196	3.66049	3.555	4.49711	4.71547	4.3818	1.75174	3.33664	2.22525	1.33466	2.159	1.4377	1.68059	1.62662	1.73947	2.26696	2.09522	2.10258	2.17863	1.31012	1.2905	1.96519	1.94065	1.87686
Peak_13190	Chr5	9807961	9808597	AT5G27700	5.99454	4.64235	4.69654	5.51456	5.08361	6.17001	5.92229	5.15587	6.00228	4.13398	5.00104	4.40752	3.25661	3.40886	2.55729	3.60756	2.4231	3.11726	6.26033	2.66051	4.69912	4.85395	4.51848	4.503	3.80626	4.60622	4.45397
Peak_13217	Chr5	10282103	10282685	AT5G28290	2.12593	2.98871	2.7716	4.36746	3.62592	3.70487	4.83268	4.74528	2.92386	2.66164	2.65036	3.51032	2.66164	3.3778	2.64472	2.90694	3.30168	2.2951	2.74623	2.14003	2.71803	2.21052	2.01315	2.49247	2.7575	2.49811	2.23589
Peak_13229	Chr5	10797013	10798284	AT5G28770	5.66797	5.77006	7.2885	6.08021	9.18945	7.39575	7.4061	7.46813	6.96413	3.19582	5.00761	4.19218	2.83011	4.63414	4.12885	2.55614	3.28758	2.80943	4.76724	3.87686	4.67161	5.5284	6.61134	6.78192	4.74527	6.98998	6.28439
Peak_13280	Chr5	13901126	13903022	AT5G35735	3.04928	3.09348	3.38203	4.26588	4.82305	4.01459	5.38456	6.41832	6.36719	4.47297	3.57959	4.11424	4.46345	3.35343	4.28841	5.06394	4.50764	4.42792	4.36899	2.9453	3.32657	2.25209	2.23129	2.69574	3.10907	2.60736	3.31444
Peak_13291	Chr5	14121587	14123398	AT5G35970	4.71909	7.0614	9.694	8.64441	6.63049	7.06865	8.97643	10.5758	9.1379	8.49381	2.40037	4.4551	2.77593	2.66617	1.66556	2.86847	3.01361	3.45813	2.96281	5.84579	6.33838	4.21924	4.03418	4.06502	4.76535	4.94679	5.11552
Peak_13312	Chr5	14641949	14642563	AT5G37055	3.31965	3.74998	3.74998	3.31965	2.68619	3.78739	4.39413	3.95311	4.93938	4.60261	4.59726	4.56251	4.31929	4.31661	5.17994	2.61937	2.45366	3.22343	2.79845	3.8168	2.80112	4.15892	4.76832	3.6297	5.45256	4.37007	3.68048
Peak_13343	Chr5	14998001	14999716	AT5G37760	4.49456	6.8472	7.41333	8.95463	7.0953	7.99287	7.28976	8.46513	8.26205	5.22736	4.93424	4.93424	5.03195	5.78966	5.78199	5.26664	6.9861	5.70632	4.22825	4.04816	3.23489	3.94567	3.55388	3.95716	4.97926	3.32781	4.49455
Peak_13374	Chr5	15439240	15440229	AT5G38560	7.88521	7.35222	7.21939	8.27042	8.01637	8.12928	9.23012	9.6502	9.19359	6.30617	8.85321	7.22436	5.60715	7.11644	5.78314	6.43568	6.6067	6.91388	5.78647	4.78857	6.51704	7.74739	7.06829	7.15463	5.09242	6.85908	5.16548
Peak_13381	Chr5	15482357	15483206	AT5G38690	3.04391	2.57398	2.8776	3.08839	3.80585	3.85613	4.69157	4.42469	4.98745	3.13867	3.2547	3.41328	3.65501	2.34772	1.98802	2.95882	2.60879	3.23923	2.46568	2.95882	3.05745	2.49663	2.96656	1.90486	1.97255	2.75576	3.55058
Peak_13409	Chr5	15826414	15827804	AT5G39530	5.34497	6.44871	8.78263	7.38228	7.39882	7.20147	8.59355	9.05088	8.22721	9.53184	3.67637	7.5938	5.51278	6.83868	6.05519	6.96513	5.78576	5.93584	4.99872	8.10313	9.95372	4.70093	4.60166	5.30361	4.78601	5.43951	4.19869
Peak_13413	Chr5	15854685	15855265	AT5G39600	1.81637	2.95656	2.83773	2.419	3.83928	2.73587	3.98357	4.52113	3.93264	2.74153	2.07666	3.4545	2.99617	2.74153	2.19549	2.62271	3.19421	1.90691	1.73149	2.40485	2.31715	3.29324	2.73305	2.6991	3.3187	3.08953	2.63119
Peak_13414	Chr5	15878630	15879808	AT5G39660	6.99342	5.74699	7.10775	9.0262	10.1165	9.03456	6.38136	6.70482	5.75395	3.34195	2.83306	4.33742	3.34195	3.34195	2.80936	3.98608	5.50858	4.05719	3.29734	3.76022	3.29315	2.77311	1.79297	2.41758	5.74977	7.73376	5.43468
Peak_13418	Chr5	15903199	15903974	AT5G39740	5.37621	5.91425	5.50119	6.57092	7.77622	7.98169	7.45636	5.16861	7.03906	5.3529	5.58379	5.82952	5.76809	5.98627	4.97797	4.6454	4.6454	4.8424	4.66446	4.2408	4.19844	6.57516	5.72784	6.59422	4.56914	4.30859	4.42933
Peak_13423	Chr5	15942682	15943517	AT5G39830	5.10636	5.21451	5.8968	5.37967	6.65183	7.87091	9.01331	7.50323	8.10686	7.35575	6.16617	7.98495	6.32544	7.35575	7.05885	5.82011	5.22041	5.52321	4.85075	4.21171	4.45946	6.55549	7.11981	5.41507	3.69852	5.419	5.06114
Peak_13460	Chr5	16237474	16238019	AT5G40540	1.35176	1.08081	1.63777	2.17365	3.62777	3.2936	2.36332	3.64584	2.58008	0.770714	0.921244	1.93281	0.876085	0.614162	0.379336	1.48122	0.556961	1.7311	0.626205	0.921244	1.07177	1.22833	0.918234	2.41751	1.84249	1.55648	1.71604
Peak_13463	Chr5	16256122	16256870	AT5G40600	3.71334	5.05427	4.7536	4.49463	6.61685	6.91532	5.78947	7.62859	6.57296	4.74043	5.8158	4.84358	5.70827	5.53708	5.23861	4.31687	3.95914	4.71849	4.47049	4.77993	4.28614	5.80703	5.55026	5.89921	5.37249	4.81725	5.03671
Peak_13482	Chr5	16383223	16385378	AT5G40890	6.28086	6.16573	5.40331	6.26866	8.31195	7.5968	4.7522	4.23832	5.48107	3.8106	5.80815	5.16848	4.27568	4.56921	4.37632	4.97025	3.88837	4.45943	6.21452	5.1822	3.8106	6.32584	7.17061	6.76881	5.05488	5.59925	4.84902
Peak_13492	Chr5	16433390	16434225	AT5G41050	5.0808	4.13307	3.54712	4.05835	3.97773	3.41538	5.68837	4.32576	4.32969	4.00133	3.42128	3.49403	3.18533	3.64937	2.59742	3.64937	4.7662	3.30921	2.97691	4.96479	3.86959	4.09767	5.65888	5.01198	4.83108	5.68837	5.29709
Peak_13495	Chr5	16447173	16448099	AT5G41100	5.6974	6.48649	8.78106	10.4922	12.0048	9.94607	9.41942	10.3078	10.4	5.31793	6.79503	6.24533	7.44404	7.09826	8.109	7.49015	5.34453	7.34474	5.96516	3.65286	4.43131	6.42088	7.7845	7.69407	5.6974	6.51132	5.22927
Peak_13521	Chr5	16636061	16637186	AT5G41600	3.93137	6.82333	8.94303	7.06712	9.05835	6.95033	9.31383	8.63062	8.71091	5.14888	4.4102	6.03063	5.38976	7.37369	6.58975	5.60582	6.99851	5.73282	4.36932	4.97662	5.86129	4.50217	4.20728	5.11677	4.46713	4.61312	4.69049
Peak_13527	Chr5	16675689	16676616	AT5G41700	4.79497	5.26438	5.89674	5.34763	6.53618	5.43088	9.23746	7.44842	8.77691	7.40413	6.5043	5.68063	5.81526	7.53698	6.30768	4.78789	5.09433	4.24586	3.20787	4.50979	6.32894	5.30334	4.96679	6.93651	4.24586	4.51688	3.63298
Peak_13528	Chr5	16688533	16691848	AT5G41740	3.47496	4.27157	5.51036	5.76268	6.23063	5.83951	6.03929	5.98228	5.89057	3.76495	2.78839	3.03377	3.06153	3.05013	3.19091	3.89681	3.68613	3.10962	2.97924	1.95163	1.87082	2.47758	2.59953	2.55342	3.70199	2.55342	3.10168
Peak_13529	Chr5	16693973	16696423	AT5G41750	2.2494	2.71819	3.45793	3.24935	3.90257	3.92873	3.26947	2.83891	3.0515	2.86104	2.57332	3.14674	2.61155	2.55521	2.03948	3.51829	2.46132	3.4036	2.37414	1.91339	1.26554	1.71488	1.67598	1.59416	2.63234	1.11263	2.19306
Peak_13573	Chr5	16942688	16943240	AT5G42380	1.47733	1.62893	1.84592	2.60093	3.76615	2.49095	3.34703	1.97076	1.38518	1.15927	0.303194	0.856078	0.454792	0.844188	0.606388	1.01362	1.32276	1.62893	1.21575	1.66757	1.13846	0.606389	0.606389	0.757986	1.40896	1.21278	1.36437
Peak_13594	Chr5	17148850	17150118	AT5G42760	4.35105	4.82903	5.39899	6.14122	7.30572	5.95727	2.09068	2.40545	2.77851	1.03627	1.24741	0.990936	0.660624	0.330312	0.792749	1.25519	1.38731	1.2241	1.90804	1.41969	0.580313	3.29405	3.95338	3.72281	4.42618	5.8394	6.01168
Peak_13599	Chr5	17166750	17167635	AT5G42810	5.19296	7.27275	6.63081	7.12803	7.67719	8.13731	8.04269	8.37108	7.64936	4.12246	6.15029	7.59927	6.04269	5.3822	6.3117	5.12246	5.87014	4.86272	5.06309	4.69203	4.5065	6.11319	6.2412	4.30428	4.01114	6.84417	5.2412
Peak_13612	Chr5	17245139	17246041	AT5G42990	4.99872	4.82761	5.614	4.95139	6.0163	6.67163	3.97386	4.59642	5.66315	3.14013	4.25419	4.35249	3.71354	4.34703	4.17773	5.16437	4.49266	4.23599	4.48537	4.7202	3.60614	6.41678	5.83063	5.44653	2.90348	5.98718	3.43138
Peak_13621	Chr5	17324940	17325734	AT5G43150	3.78175	4.49716	4.29039	5.47103	3.31859	4.1684	4.2325	5.49791	4.3793	2.99397	1.33777	2.48532	1.44116	1.89811	1.5342	1.58176	2.53081	1.58176	2.41916	2.82856	2.88025	2.63627	4.25938	3.35168	4.29452	3.69077	4.50543
Peak_13629	Chr5	17384800	17385626	AT5G43310	3.00732	4.00512	4.4106	6.49366	6.44794	7.33046	7.19332	6.74212	5.95302	3.7507	4.96714	4.25755	4.22973	4.52588	5.44418	4.58552	4.52986	3.66324	3.13254	4.31519	3.95344	4.39868	4.12239	3.90375	3.14248	2.63563	3.04707
Peak_13642	Chr5	17522456	17523516	AT5G43620	2.89871	3.23645	4.6494	6.2684	6.22346	6.53487	5.41164	6.05305	5.58516	4.04208	4.26052	4.74235	3.9956	4.76559	5.36981	3.54321	4.01419	4.48207	3.21321	3.58039	3.47659	3.21476	3.14659	3.47659	3.00251	2.84448	3.19462
Peak_13643	Chr5	17526662	17528108	AT5G43630	4.96545	4.73598	6.85234	6.507	6.95571	6.40021	5.48119	5.14607	5.19946	3.63292	3.24441	3.95895	2.31744	2.99222	2.37764	2.78092	3.36028	3.35233	3.30462	2.72753	4.00098	5.91287	4.6201	4.12935	4.20319	5.09836	4.8882
Peak_13650	Chr5	17574419	17575088	AT5G43745	1.91121	3.2336	3.0496	2.63006	3.1281	2.58099	4.17817	4.91419	4.32537	2.77727	2.6963	3.37835	2.98826	3.36118	2.0805	2.13938	1.67078	1.0378	1.94556	3.25323	3.06677	2.56137	2.87786	3.43724	3.08394	3.00298	3.48876
Peak_13656	Chr5	17618656	17619310	AT5G43820	3.45572	4.31902	3.67908	4.52732	4.86611	4.86611	5.69178	5.96783	7.69694	3.78448	3.69413	5.6466	5.11959	5.24757	5.3856	3.45572	2.94878	3.04164	4.32153	3.0316	2.68778	4.12328	3.52097	4.86863	1.90479	3.47078	2.74299
Peak_13670	Chr5	17697815	17698366	AT5G43990	2.12621	3.12975	3.33225	3.27269	3.2578	5.02666	3.92782	3.55559	4.25241	3.8355	2.93023	4.30005	2.96299	3.12081	3.50198	3.5139	3.57345	3.76404	2.04878	2.93619	2.51928	1.48894	3.01957	2.27808	2.14407	1.21497	2.30488
Peak_13679	Chr5	17734657	17735974	AT5G44070	5.97277	7.31848	7.34467	6.26211	11.4367	8.42971	6.68616	7.60034	6.87946	5.18828	6.67742	4.82161	6.19726	5.81686	7.41326	5.63104	5.04735	5.26935	5.85178	4.83533	3.90618	5.72458	6.55146	5.87299	4.59587	4.56345	4.2292
Peak_13683	Chr5	17755130	17755768	AT5G44110	3.04834	3.33645	3.67602	4.3963	5.47672	3.74804	4.13134	3.01747	4.64068	2.1557	2.57758	2.78338	2.30491	2.56729	2.78081	2.62389	2.88628	2.23031	3.01747	4.22394	2.49269	2.01937	3.15381	2.12226	2.68305	3.93583	3.41105
Peak_13685	Chr5	17764723	17765456	AT5G44150	3.63918	4.22593	3.33685	4.61112	5.30088	5.13964	6.24595	6.79239	5.98169	4.74101	6.0959	6.66697	4.53946	5.36359	5.15083	3.65485	3.99974	3.54064	4.6895	3.25174	3.7937	5.87195	4.29983	5.51587	3.34356	5.44869	2.68739
Peak_13689	Chr5	17803382	17804199	AT5G44200	7.60805	7.83312	7.81503	8.07225	9.21968	8.43798	9.16744	9.22371	8.59472	6.62137	9.14131	7.76881	7.39504	7.18404	8.57663	7.02931	7.02931	7.79494	6.66759	7.06547	4.86304	8.42191	9.286	7.53772	7.1338	7.3026	7.19006
Peak_13707	Chr5	17937839	17938969	AT5G44530	2.14085	1.26445	0.9636	1.68594	1.70483	1.64088	2.71349	3.4271	3.19747	3.19165	1.18016	2.43298	2.42426	1.42433	1.75715	1.40107	1.40834	1.53914	1.43305	2.13358	2.29781	0.896744	0.889477	0.523222	1.33422	1.43159	1.70483
Peak_13708	Chr5	17961262	17961741	AT5G44568	1.57187	0.746554	1.61982	2.59582	3.14032	2.63006	3.13347	4.24988	3.77386	1.81502	1.67461	1.11641	1.48968	0.69861	1.57187	1.79789	1.85611	1.79789	1.10271	0.876687	0.996546	1.30133	1.22257	1.53078	3.43826	1.42119	2.40404
Peak_13713	Chr5	18019989	18021478	AT5G44670	7.21281	9.44351	10.9626	10.9682	10.828	9.82411	9.52074	7.4831	9.07503	8.06008	6.97672	7.10249	6.50786	6.02023	6.73732	7.26577	8.26638	7.16979	8.2388	8.27079	7.3143	9.06401	9.37401	10.6052	10.3294	8.92721	9.83846
Peak_13731	Chr5	18172406	18173220	AT5G45030	3.29565	3.99552	3.40254	4.03384	4.08627	4.30814	5.45173	6.48439	6.12941	2.87814	4.10644	3.69096	3.85433	4.62076	3.91484	2.83175	2.98302	3.27144	3.65465	2.96285	2.74502	4.4231	3.53566	4.04997	2.7773	2.36585	3.86038
Peak_13732	Chr5	18176283	18176864	AT5G45040	3.03903	3.51918	2.66057	2.6182	3.84115	3.522	3.74513	3.78749	3.74512	2.49393	3.77337	3.31299	2.66339	3.46551	2.65774	1.60707	3.63215	2.67751	2.44874	2.4911	2.79896	3.04186	2.44874	2.18607	2.16065	2.59278	2.29339
Peak_13735	Chr5	18228878	18230991	AT5G45110	6.14671	7.64276	8.04943	9.99337	10.5089	10.7834	10.5633	9.52371	10.6092	7.00282	7.4577	6.46396	6.75555	7.50279	7.18632	6.9445	7.07669	6.06662	5.65762	5.39324	5.43445	6.1506	6.93362	7.10935	5.07599	5.02157	5.05033
Peak_13749	Chr5	18369119	18371055	AT5G45340	3.78912	5.46006	6.68717	10.3117	8.58045	8.00339	5.48382	5.16644	5.50843	2.81913	2.94813	2.87939	4.76079	4.40352	4.56051	4.74721	5.22839	4.89063	3.66012	3.85446	2.7487	2.5968	2.05792	2.40416	4.80407	2.46696	3.68728
Peak_13750	Chr5	18382760	18383664	AT5G45350	0.824619	1.20423	1.68556	2.09969	2.68637	3.5019	5.21653	3.52189	4.56265	1.20423	0.877292	1.38042	0.926334	1.85267	1.48213	1.3895	1.6783	1.29687	0.741067	0.8337	0.648433	1.0444	0.463167	0.5558	1.21513	1.26962	0.8337
Peak_13772	Chr5	18505817	18506162	AT5G45630	1.21146	1.69605	3.00253	2.12837	4.07146	2.77924	3.06429	3.4396	3.21631	1.26372	0.950166	0.774386	0.484585	1.02143	0.00475083	0.96917	0.451329	1.1497	0.85515	0.788638	1.1402	0.484585	0.484585	0.242293	1.45375	0.821894	0.760133
Peak_13807	Chr5	18791695	18792605	AT5G46330	6.29909	3.56004	1.85129	4.17714	4.67334	5.525	4.72928	2.79859	3.51493	5.21826	4.47486	5.40411	3.92633	3.5041	3.20457	2.57485	2.39261	2.5965	4.65529	3.52034	4.04902	5.68379	5.22548	4.96926	5.72709	4.98009	6.39832
Peak_13838	Chr5	18989845	18990794	AT5G46800	5.85189	5.5785	5.68924	5.18918	7.31226	7.25689	6.43673	7.2569	7.7483	5.72038	6.62879	6.18929	4.45899	5.54562	5.41066	3.88453	5.44181	5.04211	4.62337	5.33798	5.65117	5.02134	5.80517	5.81036	3.72534	5.22552	4.32057
Peak_13844	Chr5	19046376	19047351	AT5G46910	7.31452	8.86231	8.37052	10.0581	11.8164	11.6345	7.65642	10.0126	8.74104	5.07115	6.17936	6.14063	5.952	7.59747	7.44926	7.07031	7.90231	6.80926	4.93136	5.29347	4.77473	6.79916	6.47916	6.37137	5.56631	5.84084	5.75494
Peak_13849	Chr5	19097721	19098887	AT5G47040	4.87784	7.03857	6.89631	6.97378	8.16401	7.16815	8.6387	7.65834	8.32881	6.61177	5.59057	7.59354	6.29485	7.48649	7.00617	6.00328	6.10188	5.84411	5.89482	5.55113	5.23843	6.63854	6.15822	7.22168	3.83832	5.17223	3.82283
Peak_13852	Chr5	19119501	19120924	AT5G47070	3.47343	5.0341	5.79135	6.45049	7.73642	7.25044	7.98808	7.71219	8.14506	5.08258	5.3123	4.88634	5.58934	6.06378	6.18152	5.24419	6.1365	6.13073	4.55736	4.86441	4.41537	5.67938	5.2592	5.23958	4.65086	3.70891	4.81939
Peak_13857	Chr5	19135914	19136882	AT5G47120	4.49879	5.78634	6.88899	4.89744	7.44878	7.91698	7.7253	7.99502	8.62098	5.79651	7.32495	5.18412	7.34361	6.05267	5.68625	5.06538	4.80244	5.37921	4.67182	4.87708	3.84738	6.49543	6.509	5.33171	3.18919	3.56239	4.48691
Peak_13887	Chr5	19286468	19287027	AT5G47550	3.66917	1.88742	2.00777	4.07718	2.59484	3.50186	2.09583	1.26513	2.20737	1.04791	2.69464	0.824829	1.17413	1.62031	1.47941	2.0929	2.0019	1.50876	1.64672	2.95588	2.39523	1.64672	2.45394	2.3923	2.54494	3.09972	2.7416
Peak_13888	Chr5	19288279	19290496	AT5G47560	5.24486	7.26365	8.95858	7.79799	6.76488	7.9766	6.34763	6.08528	6.06304	4.21619	4.19099	4.0398	3.00966	2.86366	2.8103	4.47336	4.71052	4.12281	4.2525	3.24311	4.36515	4.95138	5.66952	4.61121	7.55861	6.19867	6.9924
Peak_13898	Chr5	19328326	19329007	AT5G47700	3.31168	7.20664	6.79931	7.37295	6.89571	6.32208	5.97741	4.08778	5.84244	4.14321	5.13864	4.66624	5.11696	4.55295	5.27362	4.35291	3.70696	5.12178	3.22973	4.01547	3.51896	4.53609	4.50716	4.22034	3.30445	4.07091	1.95712
Peak_13914	Chr5	19397317	19399273	AT5G47910	7.66794	7.89304	8.99422	9.28401	9.43015	10.3407	8.13915	9.93833	8.78171	5.94519	4.81797	5.82843	6.55416	6.21145	5.56637	6.40549	7.88212	7.2698	5.00444	4.41227	4.75497	5.70664	3.9839	5.46642	7.1396	5.11952	5.97374
Peak_13936	Chr5	19605964	19607034	AT5G48380	4.42641	4.34814	5.80775	6.29121	9.00783	7.88281	8.26192	8.30489	9.12602	2.9975	6.69487	6.37102	5.312	7.58046	5.72333	6.45237	6.42628	5.78319	4.01508	4.68733	3.78946	5.16619	5.71412	5.87067	4.56608	4.38344	4.18237
Peak_13946	Chr5	19668212	19669921	AT5G48530	4.4911	6.86354	7.22883	6.65302	6.23197	6.60111	5.22648	6.71646	5.45718	4.82658	4.17291	4.3123	4.25751	4.23924	3.15588	3.60865	3.18376	3.6519	3.99219	3.83935	3.06071	4.40459	4.63722	4.06045	3.68266	5.08806	5.00058
Peak_13957	Chr5	19732062	19733108	AT5G48655	3.65339	6.26901	7.23299	6.44642	7.19373	6.84833	8.69308	8.80455	9.05104	5.38509	6.39146	5.19826	5.77132	5.68967	5.44789	4.83874	5.31445	5.68497	4.66917	4.04745	4.59067	5.19827	6.25488	5.58449	3.36294	4.3175	3.84335
Peak_13969	Chr5	19806263	19807828	AT5G48850	2.78373	3.73054	3.88064	4.01395	4.94291	4.02655	2.83727	2.79318	2.50767	1.08011	1.99858	1.68997	1.07067	1.33833	1.33833	2.01642	1.94714	2.01642	2.5717	1.65953	1.41811	3.40304	2.9076	3.28968	1.66583	2.51817	1.19978
Peak_13992	Chr5	19959876	19960647	AT5G49230	6.28558	5.76391	7.19051	7.25013	7.2118	7.72282	6.52405	7.46519	6.93287	4.82064	4.72908	5.83204	4.41396	4.28833	5.10383	3.99236	4.87175	3.39191	5.52756	5.27417	4.0392	4.76316	6.91584	5.63189	3.78369	5.26779	4.1265
Peak_13993	Chr5	19976591	19977513	AT5G49280	4.14242	4.66957	4.6856	6.09431	5.90374	5.44783	3.48526	4.20475	3.98213	3.32854	4.8441	3.72034	4.08721	2.56096	2.72124	4.65889	5.28577	3.53334	5.22521	3.61705	1.70078	5.59921	3.7239	4.63217	6.81201	4.54135	5.92333
Peak_14007	Chr5	20090810	20092232	AT5G49520	3.28411	4.45775	5.18666	4.51551	5.4766	5.26289	5.05612	6.87434	5.44425	2.174	4.00608	2.87865	3.38808	3.04384	2.89598	2.9676	2.33688	2.6661	3.32223	2.174	1.24526	3.6734	3.71845	3.06348	2.8001	3.02767	3.30028
Peak_14014	Chr5	20126512	20127430	AT5G49580	3.64889	2.81537	4.61477	5.97237	5.83822	6.02066	6.84882	5.31772	7.36038	2.73309	4.65233	3.34124	4.24631	4.34289	4.75428	3.40026	3.98695	3.6632	3.68824	4.28208	4.55753	4.56111	4.69884	4.926	4.01914	4.63445	4.70599
Peak_14020	Chr5	20192630	20193462	AT5G49700	1.9615	3.07248	4.99846	3.23824	2.29499	3.01723	2.66795	2.29104	2.50022	1.21952	1.72667	1.40896	1.14059	1.20768	1.10704	1.5392	1.66747	1.65563	3.11984	3.31323	3.53819	2.17067	1.97728	1.61024	2.67782	2.61664	2.99552
Peak_14023	Chr5	20202019	20204614	AT5G49730	5.17705	6.2231	6.66254	7.41731	4.49635	5.61902	8.7502	10.3921	9.42962	8.95408	5.32838	6.63024	4.71481	4.5888	3.93977	4.82752	4.23421	4.48876	4.03728	6.82463	8.41903	5.2638	5.90776	6.32947	6.87845	5.405	5.90966
Peak_14031	Chr5	20303224	20304695	AT5G49910	7.69856	11.0007	11.9074	13.607	11.3345	11.1771	10.0034	12.0303	12.3105	7.74546	8.96713	8.02017	7.3468	10.4222	7.77784	10.6422	10.0805	8.71364	7.45958	6.86773	6.37861	8.48584	7.00732	7.28873	5.84818	6.89118	5.52433
Peak_14042	Chr5	20371803	20372556	AT5G50100	4.3362	4.64577	5.75326	6.18274	5.40226	6.79316	5.22568	5.51127	4.94662	4.00265	2.11251	3.42492	1.60673	1.949	1.72663	2.71639	2.77962	3.22436	3.52303	3.7781	3.81298	4.90085	4.10511	5.00331	4.22501	2.8908	6.00397
Peak_14068	Chr5	20637340	20638024	AT5G50740	2.3613	2.3373	2.58207	4.24026	4.60021	3.99068	3.8851	3.23718	3.79151	4.23785	2.63006	2.93722	3.1076	4.38423	3.8347	2.60847	2.57007	2.81484	3.19399	3.71952	3.062	2.08053	1.45901	1.75417	2.86763	2.39969	2.69245
Peak_14076	Chr5	20711162	20712363	AT5G50915	2.94432	4.25443	3.62946	6.36729	4.68931	4.95051	4.08486	4.27358	4.35836	2.41782	2.90466	3.37647	1.80789	1.95285	1.95285	3.50639	3.48724	2.65851	2.89646	2.81304	2.37542	2.16209	1.86533	2.27833	2.13747	3.06877	2.72278
Peak_14083	Chr5	20744464	20745386	AT5G51010	6.38282	5.94827	5.88772	7.51904	7.243	8.12633	8.26703	8.32936	8.84404	6.67666	5.7684	6.54844	7.54398	7.24834	7.35163	7.13436	7.98921	6.25459	5.85922	6.07827	4.90109	5.43715	5.4603	6.53598	5.2448	6.56269	6.72653
Peak_14096	Chr5	20800436	20801422	AT5G51190	1.64046	2.97448	2.63306	4.10198	3.48743	3.80553	2.88787	2.63806	2.6264	2.43321	1.01925	2.18006	1.87195	2.05515	2.1301	2.69968	2.4382	2.35826	1.69875	1.29571	1.54886	2.28831	1.01925	1.42562	2.31662	1.63213	2.29331
Peak_14115	Chr5	20901939	20902864	AT5G51460	2.35207	2.90237	2.93255	3.15799	2.46746	4.53728	2.26332	2.71598	2.17278	1.12367	1.62959	1.57988	1.26746	0.947929	1.35799	1.26923	1.08639	1.31716	2.26331	1.17692	1.08817	3.34971	3.19527	2.89704	1.99172	2.84379	1.95444
Peak_14131	Chr5	21009478	21010442	AT5G51720	3.04058	4.81724	6.20211	3.91954	6.32305	5.70812	5.37936	5.35722	5.3998	3.32335	1.04249	2.22635	1.9981	2.28768	2.77996	2.25872	2.45291	1.59269	2.51934	2.95541	3.43577	1.9981	2.86684	3.02866	3.44259	3.47495	3.38808
Peak_14148	Chr5	21130310	21130965	AT5G52040	5.22955	5.62797	6.00384	6.54759	8.50209	8.20892	6.57265	7.23167	7.47472	3.19486	7.1189	4.69833	6.22936	5.52022	5.85599	5.13183	3.39533	4.26232	4.80106	3.88144	4.24478	5.51772	8.86293	6.53757	4.83614	5.52273	5.70064
Peak_14149	Chr5	21138924	21140402	AT5G52050	3.33759	3.56877	4.07891	7.34759	5.35148	4.46457	7.09641	6.22284	6.77187	2.25951	2.52292	2.51514	2.96971	2.09725	3.15087	3.0175	3.79772	2.33176	4.03445	2.20839	2.77743	3.78105	2.25396	3.17421	3.97777	2.82634	3.00416
Peak_14156	Chr5	21204241	21205473	AT5G52200	3.9115	4.14747	3.99815	4.01148	4.98069	4.87137	3.99549	3.98882	3.84884	3.50621	3.74485	3.65686	3.06627	4.74739	3.89016	2.85563	3.26358	3.1436	4.27278	3.38623	3.95549	4.77005	5.13534	4.42477	2.85563	4.03282	3.53154
Peak_14179	Chr5	21335419	21337006	AT5G52570	1.74834	3.9511	6.42092	6.49649	4.90238	4.99451	4.75125	3.9925	4.62703	2.76173	0.822929	1.15831	0.686292	0.739083	0.791875	1.28149	1.30323	1.07033	1.40157	1.8798	2.08579	0.806368	0.475125	1.00304	2.72446	2.79175	2.75034
Peak_14180	Chr5	21337882	21338735	AT5G52580	5.10845	5.04686	5.32403	5.59543	7.60877	8.89647	7.16607	9.17365	8.87915	6.35765	5.22008	6.45004	5.65317	6.04968	8.81371	4.47904	5.98809	5.44914	4.20379	5.04108	5.81678	5.28361	6.0824	6.05353	5.043	5.1277	4.22688
Peak_14184	Chr5	21361378	21362230	AT5G52660	7.75838	9.62185	8.75274	11.6954	9.38096	10.701	11.4545	12.8593	11.5585	9.1131	7.86436	10.1017	8.64675	8.95701	8.83945	7.67166	8.10525	7.7603	7.689	8.78357	9.31544	8.44248	7.00489	7.92796	7.81811	8.78358	9.18825
Peak_14195	Chr5	21452811	21453848	AT5G52900	6.65909	5.65349	5.62341	6.0589	7.69951	6.21567	4.02079	5.19425	4.02079	3.71673	4.11105	4.50537	2.81725	2.05236	1.5456	2.61296	4.03504	2.39442	5.33043	4.64315	4.41352	5.26393	5.9813	5.60599	6.77785	6.94572	8.71303
Peak_14208	Chr5	21514910	21515917	AT5G53060	7.43619	7.81452	5.47767	6.27999	6.32239	7.88138	6.52949	6.81977	5.61464	6.31423	7.1345	5.17434	5.18902	4.49106	5.65541	5.15641	5.01453	4.69817	5.82501	5.90655	6.15116	6.46427	5.4532	6.84749	4.88733	7.91073	5.36188
Peak_14218	Chr5	21582744	21583514	AT5G53200	2.97204	3.06798	2.23649	4.89299	3.91439	4.41115	4.0082	4.88233	4.15531	1.95719	1.41353	2.50086	1.3048	1.05535	0.869864	2.58401	2.63092	2.80361	1.90176	2.08938	1.37302	1.73973	1.7845	1.3048	2.47741	1.81861	1.3048
Peak_14219	Chr5	21595920	21596571	AT5G53220	2.4556	1.92868	1.8001	2.95731	2.78587	4.02879	3.19934	3.39347	3.47918	2.71275	2.61947	2.8615	2.39761	3.6481	2.18583	2.31441	3.05059	2.95731	2.41526	2.1581	2.7178	2.13793	2.22617	2.27912	2.20348	1.8001	2.20348
Peak_14227	Chr5	21649909	21651638	AT5G53370	4.85725	6.73573	7.36094	6.76139	5.42735	5.67629	4.45818	4.34701	4.03346	3.20111	5.25822	4.67862	2.73363	3.10134	2.66522	4.51044	4.51709	4.84585	5.19266	3.85102	2.95597	6.08582	6.27585	6.5229	4.36126	4.70048	5.47961
Peak_14260	Chr5	21910446	21911484	AT5G53970	4.93453	6.09262	5.85056	6.88683	7.07667	7.50067	5.06426	4.36814	4.67823	2.9854	4.11501	3.11829	1.37167	1.29098	1.37167	2.9854	4.51844	2.73543	4.03432	2.71644	3.28758	5.0168	5.69235	5.30632	5.16393	6.42802	4.90921
Peak_14266	Chr5	21958169	21959003	AT5G54110	6.7228	6.37633	8.13233	7.85869	9.20521	8.54376	10.1127	7.41969	8.84496	7.51418	7.78585	6.78185	4.21086	7.27204	4.71875	7.29567	5.34084	7.19724	5.67943	6.41373	6.71492	9.37846	9.67768	10.034	7.32913	8.05752	8.73471
Peak_14267	Chr5	21962550	21965296	AT5G54130	4.8087	6.72356	8.17107	7.47813	6.45069	6.82588	4.79134	4.87631	4.62738	2.04471	1.07711	1.38947	1.17584	0.518807	1.19021	1.15789	1.22072	0.885025	1.39246	2.83818	1.98368	3.79621	3.61969	3.49821	5.12704	5.46573	4.7303
Peak_14271	Chr5	21985259	21987266	AT5G54170	5.36687	6.454	7.30864	7.47154	7.95125	8.69292	6.50721	6.42944	6.30419	5.3988	5.78191	6.26571	4.63421	5.98984	5.3726	4.75946	4.73654	4.75946	4.69233	6.12164	4.55071	5.3857	7.01394	5.51095	4.37143	5.70824	5.40944
Peak_14276	Chr5	22038226	22040455	AT5G54270	3.56474	6.04737	7.52236	8.7165	5.66333	6.69162	11.7807	9.51776	10.6043	13.5697	2.061	6.77417	6.16531	7.46044	6.95035	5.62058	6.59285	5.60141	3.55368	8.94132	11.2647	1.6917	1.91726	1.80448	4.47656	3.62297	4.55838
Peak_14284	Chr5	22114502	22115551	AT5G54470	2.27782	3.91378	6.30902	5.90981	2.7506	4.16426	5.38693	6.70353	5.18967	5.58888	1.03793	2.95412	2.31539	2.23555	1.7565	1.75651	1.83635	1.43714	1.27746	4.84526	6.85381	0.958094	0.693522	0.798412	2.31539	1.19762	1.67666
Peak_14291	Chr5	22167178	22167910	AT5G54569	3.71366	4.96501	3.76748	4.65553	6.20065	4.08368	5.05471	5.37539	6.27913	5.71626	5.8082	6.17598	4.48958	4.67571	5.19598	3.45801	4.32364	3.32122	3.87737	3.4311	3.92446	4.9224	5.45612	5.09956	3.4311	5.492	3.31673
Peak_14294	Chr5	22179703	22180643	AT5G54590	3.47449	4.58898	5.50259	5.56547	5.07461	6.18735	7.48352	7.54117	8.4373	5.86768	4.33394	5.39079	4.95932	5.48861	5.28772	3.53039	4.98727	4.78638	3.11114	6.19434	6.80574	4.51736	4.23263	4.40207	4.22564	4.68331	4.10336
Peak_14302	Chr5	22232044	22232956	AT5G54720	5.54711	4.59109	3.31458	6.03143	5.30045	5.0772	4.91696	4.75673	4.2238	3.19035	4.13197	3.85471	2.24873	3.67287	4.04015	2.14971	5.00879	2.92029	4.12837	2.99951	2.90228	3.03012	3.10934	2.29554	5.23383	3.99875	3.7971
Peak_14331	Chr5	22369061	22370352	AT5G55120	2.46568	3.63364	4.00769	5.93901	5.04841	5.19345	5.98991	5.50389	5.8614	3.34356	2.76976	3.19343	3.43898	4.18581	3.11455	3.58402	3.04966	2.91989	3.1718	2.79393	3.44152	2.07636	2.82192	2.341	2.7863	1.55727	2.32319
Peak_14346	Chr5	22447076	22447963	AT5G55380	3.30979	3.30424	3.77627	5.62183	4.51671	4.55189	5.25716	4.74811	4.67776	2.84331	2.27687	2.33981	1.69932	2.54898	1.98254	3.47639	3.3283	2.95068	4.0706	2.7378	2.67671	4.33531	3.60967	3.77627	5.29788	3.76702	4.15575
Peak_14372	Chr5	22597936	22598597	AT5G55840	3.29254	3.80157	4.51918	4.39999	5.17719	3.87854	6.2747	5.99908	4.82956	3.46387	4.57877	4.6036	3.73453	3.69728	3.3422	3.1237	3.80157	3.41918	2.83318	3.6948	3.51602	4.9264	4.17652	4.92143	3.69976	3.3869	3.79909
Peak_14382	Chr5	22667295	22668991	AT5G55970	4.62818	4.54488	3.84842	6.01722	6.95873	7.03719	6.82603	5.715	5.58229	4.10027	2.84975	3.48518	3.50649	3.70506	3.36022	3.64404	3.58205	3.91623	3.41641	4.67661	4.89068	5.18709	4.603	4.93621	3.90266	4.53132	4.25331
Peak_14394	Chr5	22735856	22736810	AT5G56170	5.95207	7.44955	7.30496	8.40828	8.69228	9.07095	9.19489	7.8592	8.89195	5.57855	7.87469	6.42885	6.32041	7.11906	5.76617	6.32041	5.60093	6.84711	6.7576	4.9021	5.17406	8.35492	7.74904	6.79203	5.08283	5.82469	6.05706
Peak_14414	Chr5	22865160	22865882	AT5G56460	2.23492	2.20309	3.19436	3.16481	5.00639	3.6468	2.14397	1.15952	1.53466	2.59186	1.92798	2.1076	1.79612	1.62333	2.3395	3.14207	2.31449	2.54867	2.75101	2.02802	1.21636	2.55094	2.81922	2.40998	4.09242	3.51948	3.04658
Peak_14434	Chr5	22980645	22981645	AT5G56840	2.67998	2.83927	2.00999	2.91974	4.12014	3.41895	1.37612	1.59124	1.00499	1.67499	2.88197	2.87211	1.33999	1.00499	1.473	2.34499	1.88518	1.59124	2.94601	2.42545	1.8819	3.09873	2.67998	2.83106	3.43373	4.07909	3.60123
Peak_14435	Chr5	22987234	22988175	AT5G56850	5.79514	7.5192	9.58702	7.37611	8.37948	7.98511	6.12669	8.27304	7.90658	5.40775	6.45475	5.75151	4.23162	4.66438	4.22638	5.2507	4.62774	4.58586	4.31014	4.16531	3.91403	6.20522	8.71103	7.32551	3.71335	4.89472	5.04653
Peak_14436	Chr5	22989721	22991500	AT5G56860	5.43559	5.58981	5.58704	6.11157	6.45602	6.56776	5.38479	4.74667	4.34865	3.79364	5.75326	5.58888	4.14456	3.88784	3.53599	4.66264	5.91025	4.96831	4.99047	4.8778	3.87121	6.79864	6.43756	7.05629	5.74956	5.27859	5.72371
Peak_14446	Chr5	23070992	23071969	AT5G57015	6.68104	7.51638	7.52647	8.44753	8.76687	9.80558	9.0005	10.1703	9.62742	6.43397	9.89802	7.54327	7.23234	6.26589	6.9113	7.52311	5.98353	6.32472	5.18012	5.65241	4.1767	7.76514	7.02896	8.10633	5.22886	6.8508	5.74317
Peak_14450	Chr5	23084569	23085274	AT5G57040	4.56349	3.79981	3.57629	5.00354	5.89296	4.29573	5.54371	5.05011	5.7812	4.85919	3.44357	4.27478	2.81493	4.39352	3.95347	3.36907	5.30157	2.85917	4.27478	3.40166	3.45754	3.58793	2.98955	3.73694	5.69971	4.88713	4.8685
Peak_14454	Chr5	23107595	23108750	AT5G57100	4.06113	4.13365	4.71381	6.40025	6.34195	6.19122	6.88941	5.89546	7.23921	3.19373	5.54138	4.05543	4.92141	4.14928	4.53037	4.49625	5.16457	5.29397	3.4383	2.94915	3.06859	4.56877	3.96159	5.00246	3.69852	4.23318	3.77104
Peak_14471	Chr5	23228091	23228880	AT5G57340	0.636708	0.636708	1.41075	2.43863	1.23596	2.09531	1.98919	2.77155	2.49897	2.44071	0.106118	0.628385	0.399503	0.765714	0.212236	0.106118	0.424472	0.424472	0.318354	1.58553	2.01624	0.106118	0	0.106118	1.1673	1.36289	1.53975
Peak_14480	Chr5	23306941	23308292	AT5G57560	2.80003	4.80614	6.25661	6.29309	6.75874	7.00677	6.1326	5.06754	5.51982	2.30519	3.75202	3.01888	2.14957	2.92648	2.12525	2.77572	2.72465	3.43469	3.71919	1.92221	1.16597	2.79031	1.39941	1.55017	3.03833	2.12404	3.34837
Peak_14516	Chr5	23500301	23501317	AT5G58060	4.12159	3.31021	4.98632	5.66032	5.47444	4.6081	6.49596	9.16287	7.92639	7.93932	2.9627	5.12047	4.33495	4.8958	5.54879	4.70185	4.86995	3.53487	2.41962	5.05097	5.65062	3.13241	3.4783	3.09685	4.77781	4.52406	4.13452
Peak_14519	Chr5	23515066	23516033	AT5G58110	6.93686	9.58084	10.6931	9.43141	9.55197	10.0495	9.59783	10.8222	9.26329	6.45628	7.79441	7.40554	5.14873	6.56326	7.37327	7.17969	6.25251	7.8029	6.12515	6.05892	6.13024	7.18139	8.87442	7.25441	7.21195	7.99989	6.94364
Peak_14520	Chr5	23517344	23518691	AT5G58120	6.40566	8.27138	9.01767	9.80786	10.6273	10.5273	8.0214	9.45179	8.81402	3.91802	5.84593	5.17403	6.30566	7.09829	6.43004	7.04586	6.83611	7.09585	4.87771	3.96924	2.86443	6.84099	5.68497	5.97276	6.62149	6.87026	5.84106
Peak_14542	Chr5	23621890	23623540	AT5G58430	8.95472	10.716	12.7172	11.0047	12.4912	10.8265	12.6077	12.1965	13.2359	8.34738	8.83723	8.07059	9.93541	11.4318	10.1694	10.4631	11.4707	9.08913	5.94093	6.82406	6.37802	8.62417	8.71178	7.09587	7.41447	8.78347	7.99791
Peak_14549	Chr5	23667728	23668867	AT5G58550	6.54488	8.67315	8.41649	9.82813	10.0314	9.91752	8.16127	7.91037	9.33787	9.29028	8.72217	8.7337	8.0315	7.49221	7.13317	7.44752	7.49798	7.78493	6.25072	6.84912	6.55496	7.87	8.95432	8.63133	7.98823	8.5924	7.5744
Peak_14551	Chr5	23672586	23673192	AT5G58560	2.6241	1.79544	1.10489	1.8171	1.79544	1.68712	2.23685	2.45079	2.26935	2.07166	1.59233	1.27278	1.53276	1.57338	1.10489	2.07166	2.28289	2.30455	2.34788	1.60858	0.966775	4.33289	3.88606	4.25165	3.50151	3.47173	3.79398
Peak_14552	Chr5	23673942	23674578	AT5G58575	4.12367	4.18818	2.76631	3.55337	4.73782	3.26693	5.96615	3.99206	5.31328	4.69396	5.23586	4.63977	3.38822	3.87335	5.02426	3.80884	3.68498	3.41402	3.00888	2.68374	3.02694	5.28232	4.38172	4.01786	4.03334	4.43333	3.54305
Peak_14553	Chr5	23681059	23681890	AT5G58590	4.16084	5.27909	5.75721	7.69736	7.19157	7.45039	6.81224	7.15009	6.34794	4.67255	4.42558	5.11115	5.29292	4.82468	5.7335	5.01237	3.96722	5.90342	4.39397	4.05217	3.75779	5.28304	5.36405	4.47498	3.25201	3.2856	4.03044
Peak_14557	Chr5	23699622	23700180	AT5G58640	2.52891	2.8906	2.54949	1.38208	2.85237	2.69652	4.21092	3.40226	4.74905	2.09958	2.21132	2.54949	1.4997	1.07625	1.16153	2.58184	1.61732	2.75533	2.18486	2.84943	1.1233	2.24955	2.25543	2.67299	3.93745	4.26091	3.27287
Peak_14562	Chr5	23722081	23723363	AT5G58720	7.48353	9.02354	11.1542	12.7365	11.6961	10.1997	9.45659	10.5687	10.3919	10.9518	8.98638	9.59239	8.83392	10.4546	8.23303	8.88645	7.99089	7.554	8.06263	6.10879	6.86086	8.08186	8.0178	7.10301	8.79933	7.33619	6.31635
Peak_14571	Chr5	23772806	23773882	AT5G58870	6.09286	9.21865	9.60479	9.53001	8.33341	8.41277	9.0935	9.22475	9.28275	7.2986	5.81507	6.35537	6.02112	6.14932	6.95672	5.95091	5.74792	6.92772	4.51469	6.51563	7.88927	8.39904	7.4436	6.83615	6.26379	8.56235	5.9677
Peak_14604	Chr5	23967204	23968814	AT5G59430	5.91805	6.30374	6.87922	7.48429	8.66381	8.08629	7.20675	8.46281	6.94656	6.77514	7.2843	6.79657	5.78846	5.6701	6.01294	6.3068	4.72934	5.56807	6.16395	6.50475	7.01186	9.26175	10.127	8.53423	5.29767	7.34144	6.3119
Peak_14612	Chr5	23998264	23999798	AT5G59550	8.35923	9.3273	8.59696	8.94393	9.44723	8.98247	9.50613	10.2151	9.61536	9.05529	9.58537	8.70083	9.61215	10.9272	9.33907	9.12062	9.20843	8.62909	8.90108	8.14612	8.90858	7.58285	8.3014	7.80666	9.65284	9.897	9.05208
Peak_14613	Chr5	24001377	24001992	AT5G59560	4.49107	3.09812	3.46904	3.10345	4.08278	3.53308	5.66253	4.18419	4.29893	3.61046	5.1742	4.2082	3.23154	3.7092	3.2769	3.01272	3.33561	3.74122	2.60177	3.13013	2.88197	3.93335	2.58577	3.87465	3.52507	5.73992	4.46972
Peak_14625	Chr5	24073159	24074385	AT5G59750	6.13172	8.33014	9.05625	7.1338	7.58527	8.23368	8.39176	7.44729	9.2237	6.3876	5.37882	6.05	4.64601	5.05595	5.08275	5.17787	4.16775	5.57173	4.81615	4.74247	6.13172	8.21761	8.90486	7.37896	6.16655	5.80752	5.85038
Peak_14630	Chr5	24102974	24103860	AT5G59820	3.01145	3.08187	5.92283	5.82461	5.02773	5.27976	6.80681	6.37316	6.13409	2.36283	3.30796	2.64637	2.73718	3.95658	2.53518	3.83057	4.63115	3.46363	1.89026	2.49811	1.9718	2.8354	2.0552	2.95585	4.59223	2.34059	3.30796
Peak_14672	Chr5	24380728	24381752	AT5G60670	3.39342	5.82783	7.71057	6.46931	5.40926	7.48124	6.64572	7.19739	6.06357	4.90731	4.253	6.14215	6.05235	5.05645	5.88877	5.61133	5.17353	4.8143	4.41497	4.86561	3.92585	4.54488	5.11098	3.0358	3.35333	3.73982	4.78062
Peak_14699	Chr5	24571201	24571857	AT5G61070	1.72635	3.80048	5.41425	2.89977	1.49867	2.07663	2.0416	2.72964	1.93402	0.993278	0.2552	0.5104	0.805632	0.5104	0.865678	0.42033	1.276	1.18593	0.8932	1.4011	1.6588	1.44363	0.8932	1.18843	1.80892	1.50868	1.66631
Peak_14700	Chr5	24588564	24589649	AT5G61130	7.78	6.68565	5.68212	8.81985	8.53377	8.58523	5.24923	7.33045	6.32995	3.33298	6.13923	4.85114	4.86325	4.24569	6.23156	5.13116	5.32642	6.50553	6.81279	4.53177	4.72854	9.87182	7.13065	9.38443	5.86678	6.88242	6.09836
Peak_14706	Chr5	24623264	24624534	AT5G61210	6.22079	7.09765	6.63206	6.12509	8.497	8.84619	6.66181	7.64989	7.4533	4.18383	5.36074	5.70864	4.95853	6.54282	6.30356	4.35197	5.4086	5.36204	6.20268	5.12795	5.37109	5.60388	6.82606	6.2971	5.54051	5.27668	5.47455
Peak_14709	Chr5	24638821	24640576	AT5G61270	2.9693	4.82184	5.04089	4.75538	3.31098	3.34187	7.11903	7.63856	6.86909	5.801	4.29107	4.53539	4.39217	4.03645	4.43991	4.30886	4.01025	3.97655	3.2829	5.53795	4.83026	3.67606	2.38705	2.72124	3.60023	3.86702	4.00275
Peak_14737	Chr5	24783388	24784636	AT5G61670	7.58064	9.06124	10.2694	7.65698	10.2523	12.1488	8.31897	9.06124	8.88619	8.68483	7.68593	7.53326	6.92129	7.72804	7.65171	7.53853	5.84868	7.28847	5.51176	7.04762	7.26478	6.12242	8.55718	7.05816	6.57778	7.45035	7.79516
Peak_14739	Chr5	24821167	24822520	AT5G61780	3.34221	5.7569	7.79525	6.74876	7.75518	8.5273	8.4399	8.38405	8.24565	5.78846	6.2243	5.57115	4.50282	5.25065	5.26279	4.58173	4.82817	4.50282	4.73105	5.62093	5.06491	5.55416	4.53681	5.18388	3.34342	2.8481	3.54252
Peak_14760	Chr5	24952229	24953303	AT5G62130	6.39472	7.7908	10.1976	9.26485	8.92997	9.1991	8.41161	10.4637	8.55228	6.92379	6.9192	5.84883	6.32285	6.06137	5.43138	7.47886	7.33359	7.62871	5.6164	5.33199	5.62864	6.50176	8.13484	6.94061	5.92681	5.76932	5.53689
Peak_14775	Chr5	25069252	25070979	AT5G62430	5.80939	5.48215	6.50096	8.70029	7.72618	8.4539	9.26724	8.9733	9.29958	5.5982	1.35841	3.0079	4.67928	5.57918	4.51185	4.52708	4.8467	4.13801	3.3085	5.06169	6.06337	3.05642	2.79482	3.34751	5.7485	5.69428	5.31377
Peak_14778	Chr5	25079493	25080913	AT5G62470	2.243	2.30084	2.43966	2.59582	3.36508	3.75723	3.10943	2.5669	2.9498	1.08853	2.07989	1.97694	2.30084	1.52001	1.88787	2.64556	2.13542	2.35405	2.48708	1.88903	1.86358	1.71088	1.5686	1.49919	2.77281	2.53683	2.52873
Peak_14780	Chr5	25097943	25099334	AT5G62520	2.33224	2.6747	2.77507	3.93352	4.82981	3.77882	5.2443	4.83572	5.15927	1.62607	1.2045	1.2045	2.07245	1.84808	1.62607	3.07148	2.58968	2.58968	1.43241	1.26472	1.6863	1.02383	0.4818	0.9636	1.74652	1.2045	1.41942
Peak_14784	Chr5	25114072	25115245	AT5G62570	4.92437	4.28449	4.64153	6.44074	6.77397	6.88599	3.73143	5.72526	4.78435	3.96665	2.82132	4.18508	2.99914	4.07026	3.76643	4.12347	2.14225	3.84484	2.6351	2.90813	2.43348	3.85464	2.21785	3.21617	3.09855	3.68242	4.4133
Peak_14811	Chr5	25253361	25254314	AT5G62920	3.6029	3.83378	3.22899	4.1267	4.30934	4.38171	5.49825	4.82281	5.76876	4.64361	2.70174	4.74183	3.81311	3.25139	3.72523	2.59491	2.43295	2.09867	4.30073	3.60289	4.37826	1.90397	3.47539	2.29338	3.89409	4.96927	3.7752
Peak_14850	Chr5	25433121	25434496	AT5G63530	4.20026	5.70428	6.73165	7.62283	6.59188	7.27042	7.60372	7.26086	7.81158	4.68288	5.11772	6.0316	5.41638	4.55028	4.62554	5.26108	5.92529	5.85719	3.82396	4.66138	4.9242	4.90389	6.06386	5.52867	3.87174	4.10589	4.36392
Peak_14888	Chr5	25665322	25666377	AT5G64130	4.62471	5.96963	6.75417	8.49914	9.87674	8.04771	7.88116	6.70124	7.86559	4.40834	5.29561	5.58826	7.23672	5.49797	6.43817	4.65273	6.67945	6.45218	3.73121	3.91022	3.27668	6.15176	6.64987	5.99609	5.53377	4.09391	5.00141
Peak_14891	Chr5	25675804	25676820	AT5G64170	1.48377	7.42534	13.1131	9.48452	5.45828	6.58323	10.797	11.8201	9.63483	5.93671	3.21484	3.95026	6.33756	7.06651	7.57726	3.45244	4.12483	3.18898	2.13838	5.19321	7.11338	2.55539	0.977869	2.25314	1.97836	0.329728	1.07161
Peak_14902	Chr5	25721893	25722875	AT5G64310	2.16552	4.86281	6.55342	8.51827	5.43303	6.79588	6.83268	6.21228	6.71227	2.9849	3.07019	3.32604	4.93304	5.0434	3.41132	5.04842	4.59525	3.99493	2.96149	2.49327	2.04679	2.47321	0.936441	2.04679	3.5451	1.81937	3.11868
Peak_14911	Chr5	25748750	25749877	AT5G64400	4.00309	5.68914	8.37779	6.56787	8.93008	8.09216	8.59783	10.3189	8.51331	6.34053	8.84702	7.06188	6.92927	7.50634	7.18137	8.13005	8.70567	7.86629	4.69383	5.05377	4.52042	6.78792	5.88004	6.05637	4.16193	3.83988	3.51345
Peak_14932	Chr5	25842181	25843514	AT5G64660	6.29667	6.94359	7.16416	9.03591	10.5799	9.80358	8.44075	9.98842	9.10984	6.74027	7.71126	7.59174	8.17705	8.25344	8.78576	8.02056	9.48937	7.78027	7.65335	6.32255	6.45809	5.86416	5.46738	6.41004	6.46425	6.28435	7.02984
Peak_14945	Chr5	25918128	25919965	AT5G64840	11.3572	14.3845	16.9441	13.627	14.279	12.6307	13.7567	13.5277	13.3184	9.98793	6.88727	8.40943	7.20387	7.83169	8.16081	9.86721	8.43448	8.794	6.43116	7.74405	10.0094	7.50258	9.97274	8.21	10.2625	12.654	11.1291
Peak_14946	Chr5	25921397	25922540	AT5G64850	4.99603	6.08805	6.14266	7.10393	8.80518	7.33095	7.54217	5.58946	7.27778	3.39103	4.00458	3.06773	3.00451	3.29763	2.78323	3.29764	3.04331	2.78467	4.47013	3.15107	3.29189	3.57639	3.4442	3.8106	4.177	5.49606	4.39541
Peak_14951	Chr5	25948884	25950565	AT5G64940	8.30299	12.2991	14.4061	12.004	12.9363	11.8017	12.95	11.958	11.957	7.62377	7.95019	6.82143	5.70733	6.18424	4.9988	8.56686	7.20257	7.2915	5.05743	8.20623	8.4574	10.5449	10.5351	9.17473	7.18497	8.12415	6.94554
Peak_14956	Chr5	25969063	25971575	AT5G65010	4.58338	3.92141	4.66645	4.91044	6.84988	6.06036	2.71915	3.86385	3.12797	2.24034	3.90571	3.57931	1.63463	2.06504	1.76807	2.28678	3.36934	3.0207	3.90048	2.41826	1.87861	7.38757	7.29468	7.48961	5.21329	4.94772	4.3492
Peak_14972	Chr5	26086591	26087093	AT5G65280	1.65686	0.990195	1.16667	2.73529	3.20261	3.2549	2.46732	1.73202	2.1732	0.591502	0.38562	0.333333	0.196078	0.166666	0.166666	0.499999	0.833332	0.666666	1.22222	0.499999	1.16666	0.669934	0.333333	1.5	1.72875	2.34313	1.65032
Peak_14977	Chr5	26125026	26126506	AT5G65380	4.35865	6.49191	8.41318	8.42539	8.472	7.63845	9.41766	10.1169	10.5487	8.70064	6.67948	7.5208	4.01901	5.3387	4.48518	7.12013	6.53298	6.59735	6.00021	6.68836	6.18446	6.81046	7.73169	7.47197	6.73609	7.13233	6.53297
Peak_15003	Chr5	26275334	26276024	AT5G65685	5.04317	5.47137	5.70212	6.50855	5.66643	5.57127	6.62035	6.75833	5.76634	3.4089	5.59506	5.50229	5.74018	5.89956	4.24625	5.22159	4.41278	3.88229	3.99172	4.9385	2.89269	5.56414	6.72264	5.21683	5.02176	5.57128	5.58079
Peak_15006	Chr5	26296121	26297198	AT5G65720	10.032	9.9405	10.5657	8.35618	10.0579	9.28023	9.59893	9.89171	9.94507	8.1122	9.42662	9.47237	9.00272	8.9097	7.99936	8.77704	9.28787	7.54344	8.96764	9.27871	9.33208	11.0247	12.551	11.4806	9.77734	10.9347	8.47664
Peak_15007	Chr5	26299000	26300459	AT5G65730	6.19348	6.04149	6.70688	7.12121	6.47495	6.6033	5.02369	6.09778	4.76698	4.89196	5.22522	5.1678	3.8235	3.4452	3.12545	3.90456	4.92799	4.32339	5.95254	5.53146	5.19595	5.29165	4.59248	5.40311	7.66951	7.10432	6.50985
Peak_15048	Chr5	26457139	26459676	AT5G66210	5.35041	7.46052	9.21701	8.40159	11.9456	10.7021	9.30833	9.01623	9.01752	6.6723	5.56284	6.40611	7.1464	6.69303	6.58422	6.25326	6.45728	6.67231	3.59975	3.86076	3.93136	5.285	4.69043	5.41712	5.54924	4.45921	5.0175
Peak_15051	Chr5	26475095	26475735	AT5G66270	4.39284	3.97741	3.3799	4.98009	5.16729	4.43643	3.66198	4.17486	3.78251	2.48235	3.35425	2.65417	2.09256	1.91818	1.66174	1.96178	1.24374	1.70021	3.53376	3.68249	3.45939	1.70021	3.80046	2.74649	3.24654	3.04396	2.47466
Peak_15069	Chr5	26568517	26570452	AT5G66570	7.89885	11.5575	14.9716	12.9958	12.1493	12.2783	13.6564	15.1821	13.3812	16.1857	10.0181	12.6731	11.172	11.712	10.9453	11.7621	12.5025	12.7606	9.43989	12.3853	13.3371	9.02131	9.67339	9.28622	9.7464	8.32168	10.0436
Peak_15072	Chr5	26578028	26578732	AT5G66600	2.86556	2.76296	3.51608	4.73318	2.46452	2.64405	3.40649	3.14535	2.76763	2.40856	1.54586	1.72773	1.42695	1.30804	1.42695	1.73239	1.63913	1.01892	1.30804	3.18732	2.76529	2.37825	1.84664	1.43861	1.84431	2.40856	1.4899
Peak_15074	Chr5	26588434	26589403	AT5G66620	3.43501	3.41129	3.90442	3.74004	5.01271	5.05846	2.63006	3.38248	3.66717	1.90137	3.02491	1.8929	2.50635	1.67429	1.94035	2.12845	3.60956	3.03338	3.091	0.86426	1.55567	3.0283	2.05897	3.26894	3.2486	2.86562	2.77749
Peak_15079	Chr5	26615799	26617024	AT5G66675	6.95594	9.16285	10.4352	10.1939	11.4797	10.3548	8.85045	10.8147	11.1043	4.92734	5.65002	5.69024	9.17894	9.58519	8.79949	7.24018	6.63281	7.23214	5.74387	4.51304	4.7812	5.94901	5.1298	5.3336	5.36175	6.15013	6.31102
Peak_15091	Chr5	26688858	26689889	AT5G66820	5.75167	6.25659	7.23618	8.00391	9.91848	8.29539	7.53722	8.55822	9.46293	4.90269	7.38271	6.82363	5.58283	6.18013	6.26137	3.82914	5.7007	4.89155	6.44454	5.64654	4.53953	7.60412	7.04185	6.51781	4.48697	4.94092	5.09383
Peak_15097	Chr5	26722963	26723826	AT5G66920	2.44856	2.03761	1.98244	2.65213	3.12206	2.13084	1.17006	0.582175	0.679204	1.02546	1.37934	2.3287	1.26138	0.962681	1.45544	1.7294	1.85117	2.00337	2.86712	2.13654	0.977902	3.01742	4.06001	3.0802	2.42573	1.7294	1.84355
Peak_15102	Chr5	26755608	26757365	AT5G67030	8.80615	10.9605	12.9792	12.0189	8.24979	9.6673	12.3724	13.0531	11.6664	9.71406	4.33388	7.19975	5.48397	5.69809	5.38859	7.00995	7.04174	6.73131	4.46759	7.0623	9.03148	5.62703	6.66866	5.44938	7.33814	7.72525	6.62845
Peak_15107	Chr5	26794509	26795364	AT5G67140	5.02546	6.99955	6.17189	7.24343	6.22949	6.94385	9.10037	8.62797	9.25207	7.1378	4.44168	4.0269	5.77631	4.40712	4.37831	4.13636	5.31735	5.9741	3.41048	5.16372	5.06579	5.61308	5.29239	4.59339	6.07203	6.12196	4.8968
Peak_15111	Chr5	26808906	26809932	AT5G67190	7.56111	5.37793	5.38753	6.80884	6.37348	6.09658	5.22907	5.71405	5.84049	6.28545	6.94328	7.09694	5.55079	4.92016	5.52678	5.76687	6.89207	6.85846	10.3957	8.23494	7.21378	8.53906	7.59152	8.0813	9.89794	8.01887	9.73148
Peak_15118	Chr5	26832165	26833459	AT5G67250	9.1151	11.0623	13.8916	12.4014	14.7268	15.3958	13.7241	14.2686	14.1594	9.31691	12.9497	12.3671	11.3453	13.1084	11.2882	11.8442	11.0635	10.5533	8.29637	7.92318	7.76833	11.212	13.0221	11.7122	8.60862	9.322	8.84853
Peak_15129	Chr5	26884464	26886057	AT5G67385	6.25135	6.7845	7.54142	7.56927	9.08311	8.55925	5.64601	6.65353	6.06675	5.03552	6.75252	6.32044	3.15558	4.52299	3.92694	5.17989	5.03243	4.46112	5.45729	4.2095	4.71687	8.46747	8.04363	7.71776	6.32972	7.0619	7.10314
Peak_15134	Chr5	26915023	26916292	AT5G67440	3.91532	4.30233	5.13458	5.02456	4.09653	5.36496	6.29947	6.37712	5.95258	3.16332	4.67509	4.7644	4.55472	4.71133	3.60727	3.24228	3.91532	3.59304	3.8286	3.64222	3.38983	4.3088	4.71392	3.83378	3.69658	5.01938	3.49596
Peak_15142	Chr5	26939165	26939828	AT5G67520	3.40888	3.99807	3.35937	3.72823	5.30023	5.37944	4.2085	5.93645	5.35716	1.926	4.59221	2.14633	2.47559	2.76523	2.19089	3.28263	3.40888	3.03012	4.81996	3.92875	3.32718	3.87677	3.70595	4.33475	4.6442	4.02035	3.91637

## Sheet: Diurnal_H3K4me3_evening_phase
Peak_ID	Chromosome	Start	Stop	Genes	ZT0	ZT0	ZT0	ZT3	ZT3	ZT3	ZT6	ZT6	ZT6	ZT9	ZT9	ZT9	ZT12	ZT12	ZT12	ZT15	ZT15	ZT15	ZT18	ZT18	ZT18	ZT21	ZT21	ZT21	ZT24	ZT24	ZT24
Peak_10	Chr1	57464	59076	AT1G01120	2.96249	2.89829	1.93015	2.75459	2.49473	2.33881	2.77294	2.52428	2.75459	2.92886	3.21726	2.91867	2.71791	3.19688	2.75459	3.85317	4.85697	5.13315	4.22514	2.96656	3.73292	3.62388	2.59867	2.94822	3.79406	3.31102	4.1059
Peak_15	Chr1	75538	76544	AT1G01180	5.63492	6.41029	5.16969	6.08218	4.70447	4.84975	5.07828	5.49453	4.9232	7.43704	5.16153	6.5474	5.22682	6.13768	5.88466	7.12853	7.55294	6.37764	7.07629	7.46805	7.63945	5.68389	7.35053	5.96465	5.69204	6.90979	6.49353
Peak_17	Chr1	91310	92286	AT1G01220	6.8595	5.47649	5.11476	6.16968	7.79159	8.44607	8.43262	8.48478	7.74616	8.24754	11.2188	10.0932	9.53297	10.0562	11.0169	9.23685	9.04168	8.53189	8.12472	7.46519	6.54487	10.3641	9.92835	8.65471	6.09228	6.77874	6.38335
Peak_19	Chr1	97343	98254	AT1G01225	6.25072	6.21287	7.26187	6.17502	6.71033	6.86714	7.71968	8.88764	8.80472	8.38115	10.3602	9.43556	8.52716	10.4972	8.93449	7.27088	7.53403	7.33216	7.35379	6.71394	8.51093	10.4125	9.81046	9.37428	5.35673	6.07048	5.0377
Peak_23	Chr1	116956	118563	AT1G01300	7.49723	7.12104	6.75507	6.90534	7.96542	7.29891	7.81822	6.9677	8.17089	10.1275	10.2185	9.79321	8.90692	10.106	9.47529	10.6969	12.4879	11.117	10.8441	10.1735	10.6356	8.03085	8.65852	7.64239	7.40318	8.49598	8.23734
Peak_30	Chr1	157038	158744	AT1G01430	5.35315	5.81056	5.99449	6.57227	6.45478	6.91123	7.79235	7.96761	7.03064	7.9416	8.14768	8.00516	8.58198	7.47264	8.31331	7.48035	8.72354	8.68021	5.96848	7.54005	7.56508	7.90309	7.68931	7.5699	6.41434	6.18419	5.62855
Peak_35	Chr1	185031	186315	AT1G01500	5.49038	7.13417	7.2186	6.95124	5.02347	5.84728	10.7838	10.9603	10.8017	12.787	9.02484	10.7185	11.7726	13.7848	10.6136	10.1058	10.7441	11.3364	7.38617	10.9552	12.338	8.76005	7.65225	8.82529	6.30652	5.21151	5.73343
Peak_40	Chr1	204966	205890	AT1G01570	1.54072	1.45009	2.1236	2.62295	2.0845	2.42747	2.71892	2.05074	2.44702	4.73766	1.81261	3.15074	2.35462	2.82198	2.83087	4.89405	3.51682	4.30762	3.2698	3.36754	4.21876	1.63135	1.94589	1.47852	2.80954	1.94944	2.36883
Peak_42	Chr1	223342	224378	AT1G01610	3.23368	2.91824	3.52852	2.98323	3.77738	3.81543	2.5172	3.26697	2.75338	3.5412	4.44631	3.15284	3.30501	3.83286	3.87249	4.72847	4.4051	4.70469	5.48141	3.63789	3.1354	5.49726	4.9599	4.27195	4.03259	3.4667	4.0104
Peak_44	Chr1	229002	230000	AT1G01630	2.90584	2.85318	2.51751	3.09013	3.32048	3.67919	3.3501	3.66274	3.00456	4.11687	3.63641	3.39453	4.20079	4.42951	4.45254	3.28429	3.88323	2.80876	3.4406	3.17898	3.18885	2.99469	2.76927	3.39947	3.16252	3.69235	3.03747
Peak_53	Chr1	277923	279601	AT1G01760	5.3827	4.79332	3.89458	5.63333	5.04297	4.54367	7.09796	6.85124	6.43417	6.77096	6.87473	8.05348	7.34271	8.13278	8.1132	7.73922	5.83012	7.02845	6.53893	7.64229	6.31179	6.25991	6.8532	6.64173	5.68326	5.03416	5.04297
Peak_59	Chr1	303475	304129	AT1G01840	3.52599	2.81577	3.19974	3.70919	3.7117	3.08932	5.32286	4.39682	5.98038	3.96768	4.00783	3.30514	3.9476	4.59508	4.13833	5.49854	6.30914	6.67303	4.05049	3.50591	3.6339	2.55979	3.19723	2.34648	4.19354	3.83969	3.48332
Peak_63	Chr1	321927	323547	AT1G01930	4.33916	5.05812	4.91109	4.66771	5.46172	4.59571	5.59659	6.27195	5.24167	5.79331	7.25457	7.35192	5.84706	5.63106	6.13099	5.12708	6.25776	5.12505	5.0997	5.44042	5.99917	5.73247	6.48085	5.51039	3.77534	5.11998	4.79244
Peak_67	Chr1	343344	344466	AT1G01990	8.91715	6.6703	6.51368	7.87496	6.94255	7.58075	7.39046	9.25674	7.76371	7.78128	8.65074	8.6888	8.58927	9.18208	8.09745	9.22893	8.96253	9.01961	9.53777	8.12965	8.30676	10.6751	10.3282	10.6678	7.42998	7.76372	7.61441
Peak_68	Chr1	345628	347051	AT1G02000	6.84527	8.09774	8.40364	8.65644	8.34245	8.32052	6.85104	8.20163	7.82992	9.48526	9.86042	10.067	9.39869	10.7608	9.24284	10.8255	10.3175	10.4226	9.11471	8.24203	8.83074	8.94272	9.85812	9.30172	7.67755	6.82911	7.24121
Peak_70	Chr1	353672	354956	AT1G02020	9.79238	8.61934	9.4649	8.6526	9.32418	8.08974	9.79238	10.1122	10.3412	12.5401	13.7247	11.0729	10.9104	12.3227	10.9731	12.1883	14.3541	12.0591	9.80644	9.65549	9.96634	11.8967	11.9875	12.1564	9.61712	10.0431	10.5689
Peak_77	Chr1	401237	401973	AT1G02130	4.77747	4.2288	4.89791	6.22945	7.19297	6.8428	5.2057	7.00562	4.93136	7.27103	7.42046	7.871	6.13354	6.59745	5.34398	5.45105	5.35068	6.09562	5.10533	5.62724	4.7507	5.11872	7.07699	6.13577	4.0972	5.00497	4.32247
Peak_79	Chr1	408629	409755	AT1G02150	7.57572	7.49404	8.58067	7.40216	7.45612	8.04537	9.24431	10.1909	10.8954	9.10428	9.65415	10.732	10.1428	11.4146	9.19033	8.78632	8.67693	9.59582	7.66031	9.39016	9.33036	9.6702	9.88461	8.604	7.74491	7.26068	8.19123
Peak_83	Chr1	418925	419996	AT1G02205	1.79406	1.64226	2.50248	1.63306	2.20194	1.74192	2.58069	2.60982	2.45341	2.8981	1.61925	1.55332	3.79513	2.8935	3.59425	3.9776	3.64179	3.57739	1.61772	2.79229	2.18201	2.12221	1.32944	2.13141	1.74192	1.28038	1.77106
Peak_85	Chr1	436107	436926	AT1G02230	1.22683	0.904084	0.703622	2.37748	0.441016	1.00431	1.01233	0.920121	1.11457	3.29559	0.92012	2.14695	1.81017	0.817885	1.43932	2.69822	3.50007	2.93276	3.52212	2.65813	4.12952	1.31704	1.26692	1.20478	2.76036	1.32906	2.72628
Peak_88	Chr1	449722	450547	AT1G02280	5.6458	6.96521	6.6866	6.85376	8.15526	6.6249	7.55426	7.48262	7.5264	7.84282	8.22491	8.79208	5.8249	10.1354	6.18311	5.94431	6.74431	7.19008	6.43585	6.15923	6.68261	7.05476	5.88262	6.08958	6.22291	5.98411	4.10748
Peak_89	Chr1	452124	452906	AT1G02290	4.73193	5.41002	4.98175	6.36732	6.29384	5.68083	6.15949	8.28402	7.16297	6.0986	6.37571	7.78437	6.91735	8.0216	7.61643	7.18397	6.18258	6.80189	5.40372	6.70531	4.70044	7.3876	8.12028	6.21617	3.8544	3.10493	3.64027
Peak_90	Chr1	453163	454135	AT1G02300	1.32449	1.29239	0.717996	0.687587	2.67094	2.03404	3.05613	4.38738	3.10174	3.84339	3.54943	3.56295	6.07678	5.90446	5.13409	3.58153	3.99713	4.23533	2.11682	4.55463	5.68315	2.1844	3.10343	2.62026	2.06783	2.03235	1.29239
Peak_95	Chr1	474348	475181	AT1G02370	4.70471	4.41891	3.92026	5.13438	5.03582	3.24619	6.63034	4.2908	6.01343	4.35387	6.23417	6.9043	5.89911	6.47463	5.32753	5.01809	5.19745	5.81042	5.07919	5.07919	4.92545	4.97079	6.04299	4.91757	5.18956	6.05876	4.42285
Peak_100	Chr1	493443	494302	AT1G02420	5.12251	4.12094	4.10565	7.41043	6.86377	6.64014	8.20557	5.72268	6.93258	7.36837	7.56525	7.32632	5.97498	8.77706	6.94596	6.6325	7.66656	6.72616	7.58054	8.68723	5.93102	7.74874	5.60417	5.83354	4.65421	4.32737	3.9298
Peak_109	Chr1	591809	593176	AT1G02720	7.52923	5.81214	6.0849	7.72148	6.59318	6.95365	9.45419	6.55713	8.91226	8.44484	7.8873	9.15258	8.46768	9.07328	7.97862	7.74311	9.62842	7.51961	8.21654	8.17328	9.06967	7.35379	7.10867	7.29371	7.18677	7.81761	8.565
Peak_119	Chr1	641405	642081		2.78254	2.50089	2.74855	3.54981	3.57651	4.21023	3.46725	4.54774	3.8873	4.73955	4.51374	4.36563	5.20088	5.52623	5.54809	3.87274	3.61779	3.42355	3.34585	4.97021	4.40933	3.46968	3.43812	3.01321	4.82939	3.46725	4.42147
Peak_126	Chr1	691658	692676	AT1G03000	4.93621	5.42983	5.93151	6.82197	6.72195	6.42997	8.53351	8.90937	9.62237	7.56884	7.65111	7.50109	8.65772	9.07068	8.80289	7.23009	7.39624	8.18991	7.46883	7.48335	7.01392	8.47382	8.14797	8.7658	5.18301	6.08799	6.15251
Peak_132	Chr1	739564	740483	AT1G03090	4.38105	6.29464	7.26126	6.23032	6.33394	5.59603	7.65434	8.58344	8.1439	7.55249	8.38153	6.5144	7.1076	9.26596	6.65198	8.56021	7.99024	7.52569	5.98017	8.29398	8.10459	7.05043	8.1582	7.57215	5.42986	4.30244	6.14991
Peak_135	Chr1	752369	756975	AT1G03120	3.85775	5.45087	7.18779	7.06041	5.34989	5.98678	8.03341	8.09799	7.93243	8.43802	5.37737	6.71216	7.05827	7.78578	7.64948	6.137	7.19742	6.27794	5.24071	6.90127	7.48999	5.11334	5.02235	4.7494	4.38546	3.98513	4.4115
Peak_136	Chr1	761120	762327	AT1G03160	9.60147	11.7283	10.8438	10.4792	10.2641	10.0873	12.9326	10.9758	12.308	11.1867	14.6471	13.5994	13.4143	15.2323	12.7992	12.274	13.0986	11.0126	10.1839	11.6154	11.3391	11.2439	13.5272	12.3937	8.92245	10.4792	10.2233
Peak_141	Chr1	789951	791287	AT1G03230	5.24242	6.07599	6.44975	8.43779	7.02267	7.67921	5.76863	6.96612	7.1739	7.95706	7.27471	8.90129	7.97674	7.4579	8.46483	7.75175	7.86609	7.1739	7.58577	7.09644	7.87346	6.63294	7.3866	7.49602	5.88174	5.92846	6.70916
Peak_146	Chr1	807312	808247	AT1G03290	2.5974	3.52466	3.62477	4.16567	4.99634	3.83199	4.39924	4.33953	5.04552	4.66969	4.47827	4.63808	4.63282	6.25904	6.55232	4.68726	4.54676	4.33075	6.23796	3.78282	4.0603	6.1203	6.39427	5.26504	2.5974	3.60369	3.58261
Peak_150	Chr1	823299	825192	AT1G03350	6.62983	7.03774	7.16272	9.3906	7.41527	8.05578	9.32204	7.96118	8.67111	9.05125	10.308	9.53206	9.60063	10.0554	10.3574	8.80824	8.79089	9.10072	10.2246	9.56764	8.95404	10.6759	10.8035	11.4779	6.39723	7.28596	6.80514
Peak_155	Chr1	846577	848723	AT1G03410	6.35848	7.72818	8.37283	6.67698	7.66463	7.00313	8.43715	8.2289	7.41044	8.78856	8.25722	9.05882	8.82302	10.1789	9.3712	10.1169	9.40795	9.51361	9.44929	8.03825	8.50222	8.85747	8.70282	8.7388	6.91126	7.14554	7.38747
Peak_159	Chr1	870033	871373	AT1G03475	8.16133	9.13216	9.3528	10.6448	10.5283	9.52563	11.3153	10.7821	11.2687	13.9949	13.5536	12.3682	14.1077	13.9924	12.9297	10.7612	12.1059	11.5641	11.3778	10.19	11.7149	12.2641	14.4423	10.9647	7.62688	9.18977	7.80094
Peak_161	Chr1	876984	877636	AT1G03510	2.56763	2.89992	3.44365	4.1208	3.64	2.74636	4.05535	3.77341	3.70796	3.68531	3.0006	4.2819	3.02578	4.32218	3.38323	4.62678	4.01507	5.20323	3.4663	4.27939	3.48392	3.53931	2.96033	3.2473	3.16926	2.69602	2.78915
Peak_163	Chr1	882824	884355	AT1G03530	3.66741	3.99466	3.01826	4.43887	4.73716	3.58801	4.84446	5.0569	5.08158	5.04939	5.03222	4.3305	5.66957	4.80904	5.05583	5.68137	4.55475	4.9936	4.71784	4.34445	4.45926	4.59231	4.62664	4.43458	4.20389	4.76506	4.06226
Peak_166	Chr1	898756	899831	AT1G03600	7.18012	10.2492	11.8716	10.9642	12.7959	12.168	13.3291	14.0272	13.1946	11.2438	10.127	12.4949	13.0984	14.5405	13.9111	12.1359	11.6822	11.9984	10.2905	9.89022	9.94369	10.5991	10.1286	8.81016	7.8691	8.72614	9.11569
Peak_168	Chr1	907496	908969	AT1G03630	4.27229	6.27405	8.15092	7.09818	3.68904	6.36996	10.0545	9.29399	9.09771	9.14343	5.67965	8.35834	7.98922	9.04195	8.34496	6.44468	8.05055	7.79629	4.98489	7.60112	7.96245	5.02727	5.45997	4.7429	4.47748	4.7206	4.89122
Peak_177	Chr1	966160	966792	AT1G03830	3.44339	1.72169	1.57108	2.77081	3.17591	2.59682	3.56544	4.21205	3.83031	3.45637	4.20685	5.36763	2.96817	3.70826	3.79915	3.09022	3.13437	2.70849	3.64594	4.93396	4.25619	3.17851	2.60461	2.48776	2.38388	2.64876	2.28001
Peak_186	Chr1	1013575	1014635	AT1G03960	3.87166	3.47659	2.3704	4.48982	5.47206	5.0646	6.81684	6.95008	6.93149	7.62866	5.99417	7.21346	7.31107	6.74557	6.09642	5.2877	5.20559	5.46587	4.89883	6.27459	4.66179	5.37446	6.31643	5.34193	3.80349	3.6625	4.11954
Peak_187	Chr1	1017994	1019233	AT1G03970	8.36476	8.88176	9.61882	9.38285	10.3757	9.60025	10.8172	11.7982	11.1552	8.85657	12.2621	10.0854	11.1115	12.7712	13.2961	13.4671	12.7075	11.6908	8.97057	10.4738	10.1279	11.0359	11.2255	9.0594	9.73547	8.95335	10.2087
Peak_188	Chr1	1027469	1029009	AT1G03990	2.44808	3.15531	3.37291	5.10204	4.0428	3.73772	3.43158	4.70843	4.1004	3.62679	4.02573	3.64492	4.56975	4.77669	4.24334	6.08234	5.14471	4.97724	4.0108	4.37348	4.20387	3.78893	3.97133	4.0812	3.76759	4.09401	3.82946
Peak_189	Chr1	1035499	1036272	AT1G04010	4.07762	4.07124	3.62313	4.60431	6.35853	5.41558	4.94623	4.81668	4.65527	4.57245	7.4374	6.92769	6.74718	7.26962	8.31663	6.95531	5.06092	5.65769	4.8188	4.66377	7.92161	5.42196	7.46289	6.73019	4.24751	3.4681	3.75055
Peak_207	Chr1	1140575	1141493	AT1G04260	6.00099	7.28526	8.37993	7.99357	6.55548	8.5731	9.03458	8.81994	6.94362	11.4636	10.2079	10.673	9.1741	10.292	9.23669	8.6214	8.26724	8.59099	9.91281	10.3385	8.92546	7.92203	8.37993	8.56237	7.29777	7.13143	7.11533
Peak_217	Chr1	1187209	1188467	AT1G04400	4.36603	4.59451	3.55654	6.17302	5.68079	6.17432	6.4237	6.21741	6.25658	7.12221	7.94606	7.50868	8.66547	8.17455	8.48268	6.93682	6.65872	7.22405	5.72649	6.30619	7.70974	6.34406	8.10535	5.17552	3.79547	4.87784	4.46134
Peak_231	Chr1	1285753	1286654	AT1G04620	4.27166	1.57636	0.650591	1.58001	3.25295	3.11445	1.58001	1.39412	1.30118	4.85847	7.0107	7.23668	8.64356	8.35015	8.59435	5.8134	4.67077	6.13049	5.4471	5.05346	6.01932	5.94461	6.60067	4.96417	3.6393	3.89808	2.97777
Peak_233	Chr1	1298477	1298971	AT1G04650	1.03276	0.710648	0.753818	1.99247	1.02612	1.35488	3.04184	2.28802	3.27097	2.17179	1.25526	2.37104	3.17799	2.26477	2.32455	1.88621	2.3478	1.73013	1.42794	2.76953	1.92273	1.05601	0.873367	1.35488	1.0228	0.757139	1.6936
Peak_235	Chr1	1313462	1314574	AT1G04690	6.21479	7.09207	7.31804	8.03433	7.15557	8.6369	9.23357	9.94101	10.1965	11.1521	8.56306	10.4594	11.8255	11.8595	11.0044	9.40637	8.20122	9.42262	6.65195	8.7713	8.76687	10.6573	9.58951	10.9822	5.57381	5.41579	6.26796
Peak_238	Chr1	1332739	1333652	AT1G04750	5.99066	5.86836	5.7101	6.21007	8.71351	7.04635	7.35928	8.05529	8.25491	6.4007	9.44369	9.58397	8.8574	9.07141	9.27823	8.21535	7.43482	8.51389	8.75308	5.96188	7.219	6.92585	8.04989	8.78186	4.86122	7.28015	6.746
Peak_239	Chr1	1334575	1335049	AT1G04760	1.05895	0.705964	1.05895	0.705964	1.26312	1.58842	1.06241	2.11789	0.764794	1.75107	1.49844	1.57458	2.36706	2.78925	2.6093	1.86873	0.792479	1.89295	1.88603	2.06252	1.5019	1.41193	1.40155	1.23544	1.26658	0.882455	1.58842
Peak_241	Chr1	1342530	1343776	AT1G04780	6.7597	8.15699	6.79266	6.54088	8.33889	7.55193	9.25373	7.86171	9.28008	8.20971	9.00063	10.4876	9.79682	10.9186	8.99536	7.19339	8.99273	8.67504	8.02648	8.60517	8.42853	9.55428	10.017	9.14036	6.77024	5.84883	5.7816
Peak_250	Chr1	1383786	1384344	AT1G04900	2.09958	1.05567	1.50558	3.14643	2.78474	2.53479	2.77886	2.89942	2.41128	2.79944	1.83199	3.54047	3.75807	3.92568	2.92	4.36089	3.41108	4.75199	2.74063	3.8904	3.63456	3.17584	4.26973	3.90216	2.24955	2.94059	3.29934
Peak_259	Chr1	1420822	1421690	AT1G04990	2.78252	2.41745	1.91618	3.01708	4.25039	3.98179	2.60472	2.94331	3.56942	3.66022	4.34119	4.57385	5.25672	6.17413	4.80463	5.81095	5.42507	6.03984	4.59088	4.32038	4.72329	4.833	5.32482	6.53732	3.44458	2.60472	2.16208
Peak_261	Chr1	1431393	1432843	AT1G05010	5.60542	6.05857	5.30748	4.49295	6.62953	5.5737	3.92878	3.91179	3.92878	5.46608	6.74508	6.04157	5.55897	6.48679	6.60007	7.97425	8.40587	8.08867	9.04027	6.25002	5.4842	6.67372	5.99286	6.41316	6.284	6.52871	7.45199
Peak_262	Chr1	1436462	1437412	AT1G05020	2.64458	2.64458	2.54951	3.24091	2.37148	2.56334	2.11567	2.55643	1.85121	2.83817	3.54166	2.52531	3.635	4.05502	3.3377	3.44141	4.32467	3.56414	4.76024	4.35578	4.6911	2.55643	2.85891	2.37494	4.75679	4.2659	3.9807
Peak_265	Chr1	1452156	1452957	AT1G05060	4.08693	4.18326	3.41055	3.08262	3.11336	2.47798	5.26545	4.52554	4.81659	5.57904	4.16891	5.66512	4.98261	4.72845	6.06275	4.92317	5.13428	4.84528	4.06233	3.91681	4.7387	4.59318	3.57452	4.39027	3.97215	5.07689	3.56837
Peak_266	Chr1	1453988	1455247	AT1G05065	3.30193	1.9295	1.9295	2.90272	3.14537	3.15059	3.53676	2.82053	3.32671	3.97249	3.65547	3.27844	3.94509	3.53284	4.25689	4.10556	4.36648	4.66132	3.39325	3.65938	3.43369	3.77289	3.08928	2.72791	3.208	2.62093	3.32019
Peak_278	Chr1	1509713	1511022	AT1G05205	3.64143	4.79961	3.7117	4.44952	5.31157	4.70801	5.50356	5.51987	5.96783	4.28012	4.73561	4.91505	4.79836	6.35933	5.13841	5.29651	5.06563	5.11959	4.65154	4.26005	4.15213	3.65272	5.26263	3.80079	3.39172	3.58998	3.34153
Peak_281	Chr1	1547060	1547778	AT1G05300	1.92271	0.909914	0.688151	1.63693	1.30314	1.68723	2.83948	1.67122	1.82897	2.42339	2.05988	2.54456	2.44625	2.63372	2.50798	1.90899	2.68859	2.56513	3.7311	3.76768	2.44854	1.2597	1.92957	2.37538	3.29443	1.53176	2.21534
Peak_292	Chr1	1634587	1635973	AT1G05520	7.18076	6.69723	6.61782	6.95085	6.83233	7.6157	7.97718	8.58397	7.73659	8.20827	10.562	9.56052	9.20024	9.79517	10.146	8.73448	9.90184	8.93832	9.62214	10.1602	9.5143	8.72737	9.72407	8.40975	6.70907	6.52775	6.5716
Peak_294	Chr1	1645646	1647213	AT1G05560	7.46519	6.4546	6.88127	7.04166	7.65913	6.62442	7.97259	7.85937	6.95674	7.48511	8.05016	7.81952	8.01976	8.28184	7.8059	8.99891	11.1386	8.60054	8.39716	8.90665	7.3006	6.45774	8.19903	6.3571	7.56792	7.67696	8.05645
Peak_296	Chr1	1669325	1670128	AT1G05590	2.8153	2.12016	2.93183	3.43683	3.02383	2.72942	4.45295	4.37935	4.55926	4.97839	3.96022	4.08289	3.64537	5.86571	3.71897	2.71103	3.82937	3.96022	2.2551	3.4266	3.33664	4.46726	3.19966	3.44501	3.22624	2.71103	3.4634
Peak_298	Chr1	1679173	1679628	AT1G05620	1.11749	0.883176	0.825499	1.45994	1.67984	2.77569	1.44192	2.00787	1.77356	2.21335	1.97903	2.13765	1.47436	1.84926	3.0785	2.31789	2.54138	2.73244	2.1052	2.41882	3.34525	2.02229	2.46208	3.14339	1.67984	2.49813	1.9502
Peak_300	Chr1	1700242	1701169	AT1G05670	4.73298	4.96679	4.84103	6.06324	6.67257	6.12346	6.1465	7.02684	6.05084	7.08529	6.13055	6.64778	5.06776	6.25454	6.05261	6.13232	5.94988	5.07307	4.67806	5.56373	5.94633	4.69755	6.19255	6.0225	2.69418	3.966	3.6135
Peak_303	Chr1	1718296	1719038	AT1G05720	3.57519	4.4004	3.19245	2.96457	4.72783	4.57075	5.41588	5.86056	6.5132	5.59286	5.88932	7.26762	6.38932	6.55303	5.17472	5.44464	4.67916	4.42695	4.82075	4.87163	3.85394	5.34729	6.27206	5.26543	5.33401	5.6703	3.94907
Peak_306	Chr1	1729446	1730138		1.97824	1.79322	1.77899	3.44176	1.61295	2.38148	2.43841	2.22967	2.94838	3.38008	3.14526	1.91182	2.38385	3.81416	2.17749	2.56175	3.9375	2.50245	3.36585	3.73114	3.65286	1.90708	2.02331	2.3625	2.25102	1.44929	1.6936
Peak_308	Chr1	1732735	1733677	AT1G05790	5.68615	6.21084	6.66754	6.0679	6.40432	6.91506	8.42464	8.85171	8.28518	7.43975	9.00161	7.71168	8.76629	8.01848	8.58326	8.41418	7.66288	7.58967	6.87846	6.56818	8.22243	7.0092	11.1073	8.86391	5.70358	7.08067	6.06615
Peak_309	Chr1	1744663	1745704	AT1G05805	4.9077	3.94225	3.29862	5.0481	4.91086	5.57184	7.03422	6.91906	6.8733	9.69393	7.07996	7.68731	10.3786	10.8361	10.4606	8.49344	9.5772	8.61175	8.31675	10.0394	10.571	6.27542	6.4947	6.30067	5.25949	5.47088	6.06403
Peak_316	Chr1	1779272	1780295	AT1G05890	4.45139	4.6665	6.71321	6.01331	7.21405	7.54473	8.70213	8.66842	8.35539	8.42923	9.52402	8.52394	7.45002	8.27352	8.92044	6.95881	6.93795	7.36816	5.87526	6.1931	7.02462	7.4115	10.4759	8.95255	5.56705	7.43076	5.94749
Peak_322	Chr1	1820400	1821918	AT1G06000	6.27973	7.34457	8.06203	7.8153	8.64206	7.57939	8.32067	9.61276	8.18539	11.1483	9.15608	10.0218	9.35304	10.7707	10.8551	13.1276	13.0421	13.884	10.0445	9.38658	9.86922	7.75903	8.65722	8.70158	9.24806	6.40201	7.86183
Peak_333	Chr1	1883238	1883597	AT1G06160	2.52048	2.67572	0.630119	0.607289	0.237436	1.39722	0.46574	0.69861	0.484004	2.55244	1.16435	1.5753	1.18261	2.09583	0.72144	2.89489	1.98168	1.69858	3.07297	2.68485	1.63009	3.63917	1.63009	4.23732	2.99991	1.5342	1.90405
Peak_347	Chr1	1968094	1970498	AT1G06460	3.15772	3.97517	3.52065	3.78447	5.01953	3.20692	5.8199	6.42957	5.82126	8.91268	6.62094	6.7344	10.1997	10.9242	10.9392	7.72137	7.66874	7.37279	5.77547	8.12052	8.68371	5.39887	5.4597	5.19383	2.8932	4.01891	3.27664
Peak_351	Chr1	2001342	2002628	AT1G06530	6.18816	7.42579	8.20745	8.73239	6.82932	7.74381	8.84606	9.18453	7.95839	9.68264	10.9892	8.62765	9.87423	9.31607	9.42208	12.0851	12.5615	9.89722	9.10916	9.04913	9.24072	11.2856	9.16281	10.4222	7.6212	7.09882	7.59054
Peak_360	Chr1	2034090	2035509	AT1G06645	4.90011	5.87944	5.52637	5.99404	7.12038	5.44071	5.72201	7.19331	5.69769	5.84702	7.30559	7.23151	7.47461	6.11327	7.80799	8.39721	8.42615	8.67851	7.01967	5.52521	5.30527	7.52786	7.26161	6.71407	4.73457	6.25797	5.97899
Peak_361	Chr1	2035649	2037102	AT1G06650	7.00137	8.358	8.96283	8.81926	7.87865	8.02675	9.30764	9.34043	10.8271	8.93004	9.91699	10.0696	9.917	9.85594	10.2957	8.93683	8.78534	9.34495	6.78656	8.6915	8.93343	8.03693	11.1855	10.0131	6.6882	7.80856	6.91205
Peak_362	Chr1	2040334	2041138	AT1G06670	5.9156	6.0422	7.04277	6.68951	7.44707	8.62121	6.1443	7.9882	7.08156	7.8718	7.47974	8.02699	7.80647	8.44356	8.68451	7.40216	8.03721	8.28837	7.18774	7.20408	7.24696	9.60749	8.70085	8.49461	4.43108	6.22189	5.3663
Peak_363	Chr1	2047688	2049866	AT1G06680	8.15633	10.5651	14.0058	13.1669	11.7751	11.4288	12.6268	13.2861	13.6429	14.3445	10.8638	12.6373	12.5604	13.75	14.263	13.5682	14.174	13.0281	9.30147	11.2629	13.1925	8.07637	9.24565	7.15603	9.25017	8.75908	8.46411
Peak_369	Chr1	2076330	2077829	AT1G06750	5.58998	4.19166	4.68699	6.97076	7.37732	7.10335	5.85298	6.38996	6.36255	10.4118	7.36746	8.98275	6.66063	8.68249	8.30442	9.32795	9.26878	9.72466	7.26883	9.1811	9.41781	9.06824	6.97405	8.08744	7.08363	6.59707	7.16911
Peak_371	Chr1	2083327	2084168	AT1G06780	2.01472	2.58867	3.18606	3.20168	2.34855	3.23877	4.74786	4.87866	4.87865	4.89427	4.86108	3.92596	5.59123	6.90508	5.57951	3.98258	4.80447	4.78104	4.48625	3.08649	4.94893	5.67517	4.27346	5.437	3.35395	3.76978	3.62727
Peak_374	Chr1	2095548	2096433	AT1G06820	3.94806	4.25604	4.87385	5.60298	5.16142	5.10391	4.04639	4.61411	5.50279	5.70316	5.87571	6.15029	5.67348	8.33953	6.54918	4.99445	5.67719	5.85159	5.6271	6.31912	5.96105	5.64936	5.4156	5.57701	3.46012	4.55845	3.55845
Peak_376	Chr1	2104978	2106155	AT1G06850	6.83191	7.25891	6.33375	8.31244	8.76175	7.23657	4.65647	7.86033	6.41328	10.3762	9.55713	9.88366	10.5381	10.6986	9.14688	9.75529	10.8395	9.86413	9.9911	8.41988	7.42077	9.0227	10.9581	8.872	7.69287	7.02448	7.36635
Peak_384	Chr1	2155257	2156051	AT1G07010	3.9637	3.331	2.75826	4.3855	5.05956	6.07891	5.31595	5.76877	4.81971	4.32347	4.53437	4.57366	5.8246	5.96106	6.30222	3.94923	6.53794	4.10224	5.06783	5.34489	6.29395	4.26145	3.78382	3.99885	3.99678	3.76727	3.68043
Peak_385	Chr1	2159614	2160867	AT1G07030	7.42065	7.75491	10.3477	7.98562	8.32118	8.13242	10.2953	12.6745	11.6992	10.6636	10.7475	10.1826	10.176	13.0782	11.5603	10.0423	11.053	8.91893	9.21386	10.1682	9.99381	8.65676	8.94908	8.7341	7.40229	8.60171	6.73376
Peak_386	Chr1	2162364	2163261	AT1G07040	2.89402	2.62494	2.905	2.30277	4.78126	3.81476	5.33957	5.4677	4.4536	6.09556	4.66594	4.10764	6.43787	8.72782	7.8803	4.79957	6.25116	6.30058	5.66356	5.21143	4.98628	4.76113	5.30113	4.61469	3.36446	3.34615	3.92276
Peak_387	Chr1	2164222	2165306	AT1G07050	0.772657	0.54086	0.386328	0.695391	0.849922	0.309062	0.54086	0.231797	0.309062	6.10398	4.32687	5.1768	9.64609	10.7869	10.1369	9.93242	10.4097	8.94767	5.62827	6.60242	5.43283	1.95891	1.69984	1.46805	0.849922	0.927188	0.927187
Peak_389	Chr1	2169868	2171001	AT1G07080	7.82612	7.84206	8.2117	8.64946	8.63206	9.4757	8.37695	9.58732	8.89443	11.8283	9.44671	10.4889	10.344	10.9339	9.69023	8.70454	10.0439	10.747	8.42767	8.97705	10.8151	9.70038	11.4906	11.2934	5.84313	9.14231	5.91416
Peak_390	Chr1	2173637	2174971	AT1G07090	6.06663	4.98431	4.53735	5.17024	6.54683	5.09513	5.74156	5.6406	5.61104	7.85201	7.74858	9.45024	7.79168	7.54542	7.28438	8.16846	7.95052	8.78042	8.84198	6.05924	6.77585	9.81718	10.3503	9.90706	7.06028	8.97989	6.02845
Peak_401	Chr1	2221600	2222996	AT1G07230	7.6918	7.44706	7.1929	7.47294	8.48369	8.87787	8.05186	7.89654	8.01067	8.99671	11.017	9.15673	9.65564	11.2441	9.12614	8.9673	8.912	8.94377	7.69886	9.87802	7.53295	9.81214	12.2043	10.8605	6.96345	8.2213	6.90108
Peak_403	Chr1	2225728	2227456	AT1G07250	8.94624	8.14574	9.1592	10.3029	9.8266	9.78762	11.4913	11.1928	10.7716	12.2671	11.4913	12.558	11.5436	13.1436	10.8648	12.7016	11.9762	11.6938	11.3515	12.9326	11.9876	11.8935	12.6103	11.8526	8.2313	8.92152	8.53363
Peak_404	Chr1	2227680	2228722	AT1G07260	4.41916	3.27497	2.88096	3.9369	3.5161	3.86913	2.37821	3.87386	3.93847	5.79975	4.71072	4.45698	4.2127	5.39471	4.61458	5.07321	5.60906	5.5602	5.96838	7.10627	6.71384	5.07321	4.022	5.07321	6.4144	4.30884	4.79898
Peak_406	Chr1	2238020	2240191	AT1G07280	7.29488	6.90891	7.54917	7.80875	7.57717	7.07616	9.18161	8.95456	9.18614	13.7406	11.5375	11.695	11.726	12.4533	12.8582	13.752	15.8029	13.9427	12.7098	10.923	12.1203	10.2487	10.8708	9.71743	7.17908	6.32995	7.67706
Peak_408	Chr1	2247648	2250333	AT1G07310	9.89394	11.3921	12.5763	10.9992	12.5457	10.9931	13.1577	14.3327	13.31	12.922	14.6509	13.8547	12.6638	15.0266	13.3865	13.266	15.0726	13.449	11.9918	11.9716	11.9539	13.296	14.5407	13.3272	10.05	11.6883	9.95636
Peak_413	Chr1	2276071	2276617	AT1G07410	2.34097	1.31022	1.5326	1.7099	2.60542	1.96233	1.86316	2.60542	2.7136	2.91194	1.89021	2.60241	1.93829	2.91194	1.77601	3.49192	2.96603	3.66923	3.09224	3.2425	2.91494	2.48822	1.5897	2.72262	1.9443	2.45216	2.2989
Peak_414	Chr1	2277718	2278624	AT1G07420	3.467	3.73885	4.99117	5.87016	5.81941	5.89371	6.41567	5.15247	5.76685	6.56428	8.87319	7.31458	7.67162	8.07576	6.38848	7.48676	6.25256	6.35768	6.65308	6.32505	8.09026	7.57919	6.3468	7.29284	4.62145	4.33873	4.52902
Peak_415	Chr1	2281247	2282782	AT1G07430	1.32595	0.982421	1.037	1.36447	1.09158	0.654947	1.62239	1.82358	1.18896	2.83703	1.65128	2.18637	2.58661	3.31433	3.76594	3.8537	3.67498	3.60221	3.27259	2.72894	3.30149	2.29232	1.28956	2.71289	2.23773	1.14616	2.14035
Peak_416	Chr1	2286828	2287879	AT1G07440	2.14536	2.31099	2.63287	3.37508	2.43131	2.62975	4.89855	3.26726	5.24387	4.57823	4.30322	4.69698	6.13608	5.347	5.297	5.42982	6.35953	6.85641	3.64383	2.85632	4.89542	4.54542	5.68763	4.55167	2.68756	2.98757	2.07192
Peak_429	Chr1	2348971	2350527	AT1G07630	10.0517	9.65898	8.75104	11.2721	9.66847	9.53228	10.0528	12.3838	11.7493	12.3944	11.4843	12.595	10.4107	10.4941	12.1336	10.9048	12.9402	12.5221	12.0914	11.6079	12.3986	11.8887	11.8296	12.4905	8.3129	10.3167	9.38975
Peak_435	Chr1	2390901	2392433	AT1G07720	4.3191	3.74544	3.71863	3.30795	3.36263	3.71327	4.27835	3.82907	3.96739	3.48916	4.41667	4.35448	4.85095	4.60325	4.78553	7.25176	7.41903	7.02229	4.87989	4.68796	3.50632	3.6929	4.15612	4.57752	5.30237	4.96675	4.8102
Peak_436	Chr1	2395339	2396791	AT1G07725	8.76989	8.78347	7.05257	8.58549	7.73135	8.33094	9.46225	9.38193	9.14548	10.6264	10.1512	10.227	10.5483	10.5076	10.296	9.03688	10.2496	8.84456	8.78007	9.93174	10.1094	10.5325	11.8855	10.2847	6.46202	8.84343	7.26977
Peak_437	Chr1	2399673	2400639	AT1G07740	4.16132	4.33471	4.33471	5.01636	5.75241	5.67591	6.33547	6.67545	5.39203	6.76044	7.66308	6.82843	6.65165	7.93336	5.7881	6.33207	7.85347	6.90323	6.94233	7.07492	5.44643	7.4489	7.74128	7.13782	5.56712	5.46173	4.83617
Peak_443	Chr1	2421078	2422939	AT1G07820	5.07085	4.41051	4.47231	4.34342	4.99757	5.51931	5.29067	5.2889	5.17678	6.34474	7.52152	7.32465	6.09844	7.11278	6.4957	6.25823	6.68727	5.67293	5.52108	6.41978	6.47628	6.80292	7.15604	6.15317	4.0618	4.77864	4.51644
Peak_446	Chr1	2437368	2439377	AT1G07890	6.16952	6.71173	8.01449	8.4651	8.95415	8.34488	8.63357	8.44057	8.21649	6.99305	8.12653	6.63158	9.61003	9.9257	9.59285	11.2326	12.4241	11.5687	7.21304	7.60559	6.75997	6.44758	7.07483	7.23022	6.98569	6.63158	5.87756
Peak_460	Chr1	2500693	2501444	AT1G08050	1.51482	1.85801	1.34651	3.42747	1.89516	2.22961	2.93565	3.23293	3.27009	2.25802	3.24604	3.08866	3.34441	2.64492	2.72362	3.69634	3.03401	2.57716	4.24062	3.26353	3.2985	2.08534	2.00665	1.83178	2.11813	1.44924	1.68313
Peak_465	Chr1	2546994	2547880	AT1G08130	3.06149	3.77868	4.15858	3.93805	4.24568	3.83242	4.19009	4.51069	4.67748	4.49586	5.87835	4.87577	6.1934	5.1556	5.05553	5.06665	5.56701	4.53664	4.63856	5.57628	5.12966	4.17711	5.07962	5.10742	4.07519	4.11225	5.22046
Peak_474	Chr1	2606942	2607581	AT1G08270	1.83385	1.44088	0.798779	3.05128	1.96484	2.4888	2.44	2.3424	1.72341	3.11549	3.1309	3.10265	3.51617	4.95705	2.18572	3.86547	3.20539	3.88345	4.19166	4.25587	2.88177	1.67461	3.08467	2.684	2.98707	2.69941	3.18998
Peak_475	Chr1	2607869	2608959	AT1G08280	4.79275	7.06784	6.44407	7.11304	6.98195	6.03877	7.53039	8.35605	8.14812	6.46366	8.50822	7.20193	6.93224	8.5037	8.27017	7.41739	7.12359	8.07581	5.55061	7.11605	6.429	7.09195	7.34959	7.00456	5.37885	5.68621	5.01875
Peak_480	Chr1	2640051	2642946	AT1G08370	4.37114	5.90538	7.90279	7.2455	6.81638	6.2641	8.11961	8.64238	8.06171	8.68438	5.12378	7.80686	7.22847	7.64963	6.74487	6.3396	6.49853	6.22381	5.00969	6.77381	7.52476	4.47728	4.51815	4.62202	4.57377	4.31324	4.3876
Peak_481	Chr1	2645186	2646859	AT1G08400	5.18176	5.68256	5.60891	5.09928	5.74933	6.22263	6.19612	6.01741	6.24718	6.90411	6.81082	6.52998	7.36759	5.7022	7.34598	6.12542	6.02428	5.87306	5.00796	5.2122	5.68747	5.39092	5.05509	5.15525	5.05214	4.50716	5.04232
Peak_484	Chr1	2672345	2673818	AT1G08460	3.70243	4.5009	3.79945	5.57818	5.22689	4.77078	5.34622	5.53468	5.80456	4.58677	5.13321	4.25221	5.55253	7.05245	5.29491	6.00641	6.95209	5.93727	4.92802	5.56368	5.84024	4.66149	6.03763	4.37823	4.15854	3.92435	3.66228
Peak_492	Chr1	2706886	2708036	AT1G08550	2.62206	2.11222	3.16333	3.37184	4.62574	4.29727	6.04532	6.48233	6.40092	6.60229	6.48232	5.66543	6.90791	7.43203	7.71195	6.13386	6.55516	6.27953	5.28697	5.18129	6.48232	7.42347	6.29096	7.4606	4.58861	3.34185	4.3701
Peak_495	Chr1	2721043	2722059	AT1G08590	7.34614	6.87256	7.04227	7.84719	9.26469	8.36764	9.14994	9.8789	10.0939	10.3735	10.2393	10.7937	9.14348	10.7242	12.271	10.1133	10.7986	11.3772	8.69252	8.07832	10.5125	10.3719	9.81748	9.50553	6.3327	6.92266	7.7292
Peak_500	Chr1	2752055	2753488	AT1G08650	6.89497	9.89024	11.3415	11.1661	9.43172	9.27926	10.0393	11.5753	10.9735	11.9948	10.2972	11.1271	12.662	11.1133	12.4339	13.9103	12.5095	13.1068	12.3158	14.59	13.1629	9.24144	8.54564	9.63347	7.19071	6.74595	7.83378
Peak_507	Chr1	2808780	2809699	AT1G08770	6.23389	5.55851	5.83188	6.33931	6.30893	5.61568	4.89206	6.74311	5.43522	8.9908	10.6668	7.45243	8.15105	6.66806	7.42206	7.92413	8.62811	8.05099	5.88011	6.58944	6.3393	7.48639	7.99918	7.89197	5.83187	5.77113	6.95394
Peak_508	Chr1	2810638	2811249	AT1G08780	2.14069	3.23117	2.56775	3.25803	3.84893	3.93757	2.7101	4.14708	3.69852	4.63054	3.73344	4.25988	4.50162	3.96174	3.81133	5.54644	4.59025	4.87765	3.2258	3.88654	4.10947	2.93572	4.28943	3.33861	4.38881	3.01361	3.01361
Peak_513	Chr1	2846693	2847928	AT1G08880	6.25065	7.14436	6.84912	8.23623	9.52626	7.61914	7.27204	7.46089	7.16431	9.17782	10.8748	9.35736	8.74959	8.88922	8.61659	8.75889	9.89465	8.2748	8.40114	8.14313	8.6392	9.49567	10.2338	9.69915	6.49004	6.91828	6.59111
Peak_514	Chr1	2848273	2849037	AT1G08890	1.27206	1.09801	0.113883	1.39883	0.547929	1.31503	1.20545	1.3709	1.85436	3.37353	1.5342	1.12809	3.18229	3.44443	3.14576	2.08213	1.97255	1.64379	1.09586	4.27815	2.53981	1.09586	1.66313	1.30214	1.20544	1.30644	1.38164
Peak_519	Chr1	2879507	2880604	AT1G08960	7.23686	6.73385	7.71144	8.71298	12.0275	8.76088	10.6472	8.79382	9.40911	8.11265	9.74745	10.1921	11.7116	12.0305	10.993	10.4137	10.0319	9.74446	9.41959	9.49744	10.0678	9.99148	10.0484	10.0589	6.9075	6.03172	6.14399
Peak_525	Chr1	2911320	2912087	AT1G09040	1.63737	1.63737	1.85568	1.4747	0.764104	1.63737	2.074	3.24049	2.51063	2.29231	2.074	1.83214	1.71442	2.72894	1.41905	2.89589	3.0607	3.34537	2.29445	3.05642	2.24095	3.12063	2.89803	2.91944	1.94772	1.0081	1.83428
Peak_526	Chr1	2916948	2917630		0.921773	0.859199	0.736456	2.19733	1.31166	1.40071	3.7978	2.09866	2.20937	1.45606	1.45847	1.96388	2.05534	2.86881	1.92778	2.62573	1.27315	2.4717	1.22743	2.33692	2.87121	1.94944	1.23224	1.69914	0.736455	0.589646	0.859198
Peak_530	Chr1	2941466	2942419	AT1G09130	7.83298	9.56982	9.39234	9.91098	11.1309	10.9793	8.78755	10.9913	9.21486	12.3853	13.1537	11.7667	11.1292	12.5559	11.9269	11.2136	11.2618	10.8449	10.8862	10.5382	10.7208	11.3738	13.8637	12.1544	10.0178	10.5571	8.92883
Peak_535	Chr1	2967052	2967773	AT1G09190	4.52839	2.36095	1.54817	1.97391	2.4247	2.84362	3.1191	3.01893	2.83679	3.59038	3.69738	4.05711	4.29161	4.78793	3.38547	4.69003	5.93312	4.40772	4.12996	2.72523	3.33083	3.93417	2.85956	3.92734	3.79756	3.12821	4.29616
Peak_537	Chr1	2975709	2976863	AT1G09210	2.58737	3.74442	5.7739	5.49495	5.63727	5.86355	7.21986	5.24589	7.15154	5.31278	5.71412	5.95179	5.9518	7.35506	6.52392	4.86305	6.09696	4.84313	3.7245	5.21031	5.73262	4.34074	4.16569	4.75774	2.90331	4.41048	3.37581
Peak_542	Chr1	3003182	3004417	AT1G09290	4.16134	3.773	3.96185	4.64543	4.74783	5.82773	5.44206	4.99387	4.93402	6.0086	5.80778	6.26395	5.78252	5.72001	4.81566	5.28513	3.21842	5.1641	4.86886	4.77443	5.5019	4.94866	5.08697	3.89136	3.50834	3.48175	4.03499
Peak_543	Chr1	3009074	3009901	AT1G09310	2.62252	2.73369	2.12621	2.83494	3.14265	3.48809	2.12621	2.44583	2.18378	2.28701	3.53573	1.72121	2.88259	2.41605	3.28361	3.29552	2.88457	3.87124	3.34912	3.71043	3.70051	2.92825	3.48809	2.90244	3.13074	3.03744	3.70051
Peak_544	Chr1	3011430	3012460	AT1G09320	5.6871	4.1581	3.82169	4.15332	4.86121	4.58379	4.99992	4.10389	5.56273	7.15072	7.48075	7.44727	4.86759	6.71546	5.97886	7.12521	6.01553	6.52095	5.47982	5.66796	5.70144	4.9505	6.37586	6.23396	4.51523	5.12428	5.204
Peak_551	Chr1	3064036	3064843	AT1G09490	2.99869	4.1583	4.21119	3.76769	4.20509	3.34454	4.57535	6.64026	6.43274	5.04529	6.01773	5.68612	5.97501	5.26907	5.10022	4.51432	4.23154	3.86128	4.18067	3.13703	4.73199	3.89179	3.74125	3.73514	1.97132	3.30792	1.6092
Peak_562	Chr1	3130317	3131153	AT1G09660	5.2613	5.06884	6.60461	8.09129	8.55673	7.87133	10.1259	10.1946	10.3498	9.3148	9.38943	7.33125	9.16162	9.89415	9.64081	8.11093	9.74294	7.96167	8.96522	6.59086	6.91098	8.28572	10.0788	7.96756	6.26682	6.90116	5.96634
Peak_568	Chr1	3157461	3159098	AT1G09750	5.22038	6.17976	7.85968	7.41311	6.14162	5.52746	6.01619	6.15166	5.86264	10.2792	7.2977	9.72424	7.97007	9.84165	7.667	11.0449	10.1999	10.3013	8.28116	8.05235	10.0062	6.03927	4.63332	6.29517	6.14162	5.23644	6.40756
Peak_569	Chr1	3161022	3162617	AT1G09760	5.77489	6.04268	6.14567	9.37248	11.0369	8.72567	8.38168	8.42802	8.88531	8.3827	10.5641	10.7176	10.1521	10.0759	10.0121	7.78122	8.12522	8.48982	7.20651	7.6432	8.35283	9.84625	10.6877	8.84824	5.61627	6.40831	5.68219
Peak_572	Chr1	3173420	3174367	AT1G09794	6.04803	6.50927	5.80875	5.781	6.18848	6.57168	8.21894	8.9316	9.97023	9.06511	9.42924	8.59	10.1471	12.6423	11.5048	9.93729	11.1927	8.80502	9.08592	9.42057	11.8429	8.37847	7.25313	7.9207	7.22712	5.13771	6.54394
Peak_573	Chr1	3179865	3180437	AT1G09800	1.77862	3.06095	3.3134	2.88309	2.37532	2.51875	4.99161	3.65191	4.83956	4.73342	2.68801	3.95025	4.5613	5.39323	4.74203	4.63589	5.55962	4.15968	2.87161	3.63469	2.83145	2.03394	3.28471	1.75567	3.24741	2.4872	3.25315
Peak_579	Chr1	3201717	3202668	AT1G09850	6.51818	6.76854	8.3519	6.96366	7.53	8.12225	7.9703	7.45748	7.17776	8.6178	9.48631	8.78874	10.2374	10.6604	9.99395	8.42615	8.2293	10.9488	7.12768	5.94492	6.02434	8.84227	9.9059	8.38816	4.82776	5.89139	5.45972
Peak_595	Chr1	3299746	3301044	AT1G10095	3.50523	2.80672	4.00128	3.75705	3.61406	3.92535	5.15408	4.86683	5.4021	4.92757	4.88834	4.61248	4.25943	4.84025	5.16294	4.56819	4.24804	4.46949	5.0984	4.21387	4.09112	4.65424	3.54952	4.77572	2.99147	4.9997	3.67353
Peak_596	Chr1	3305219	3306302	AT1G10120	6.58577	7.00127	6.12327	7.54414	7.18171	6.58577	5.80027	5.98072	6.26429	6.71314	7.45164	8.28111	7.75796	8.13099	9.2046	7.5214	8.49038	7.56537	8.06578	7.03766	6.48568	6.65098	7.40312	5.8958	5.56826	6.37651	6.01408
Peak_604	Chr1	3346841	3347962	AT1G10200	4.27502	3.70512	2.98871	4.81416	6.33928	5.54229	6.97658	8.04314	7.39704	8.8914	7.54648	7.87905	10.6348	9.02911	9.27085	8.27169	8.32003	8.84306	8.08562	7.09817	6.27628	8.39915	8.90898	7.07767	4.73358	5.15552	5.68
Peak_606	Chr1	3355464	3356428	AT1G10230	5.22606	3.2484	3.91273	7.37235	5.48497	5.48838	5.71664	7.25822	7.55802	5.51563	6.81192	6.74379	7.01975	8.36543	6.71483	7.2991	9.83548	6.5496	7.76583	6.16122	6.56152	6.20211	6.60071	6.18508	5.73367	4.71844	5.38617
Peak_607	Chr1	3359204	3359873	AT1G10240	2.05351	2.23997	4.03587	3.09621	3.93037	5.42941	3.38571	6.67329	5.6772	5.06139	4.62714	4.31556	4.79398	6.504	6.53344	2.79444	5.24786	4.25913	4.20515	4.5241	2.51475	4.10947	5.70174	5.07121	2.50248	3.39062	2.76991
Peak_608	Chr1	3363350	3364316	AT1G10270	4.59649	4.68318	7.11742	6.45106	5.63002	4.90077	7.14462	6.41537	6.09408	6.00739	8.36003	7.90276	6.62105	8.49092	7.3418	7.4506	8.8955	8.56062	8.64391	7.89936	6.93043	7.00523	8.06256	7.83137	6.93383	5.10985	5.8646
Peak_609	Chr1	3367981	3369216	AT1G10280	6.60707	5.08697	4.68533	5.03776	7.12175	7.27203	8.77352	9.06345	7.75612	7.30129	9.39991	7.50876	7.87582	7.90375	8.04339	8.13516	8.68176	7.99552	6.59643	6.49536	8.14313	7.06723	8.16708	7.79204	5.12287	6.78262	6.57914
Peak_610	Chr1	3370371	3371394	AT1G10290	7.98458	6.83681	6.30387	8.5721	9.72788	6.66665	9.69579	9.66047	10.3652	9.11628	12.0122	10.8596	11.2497	10.1517	9.7632	8.86266	9.73431	7.63302	10.1228	9.24631	9.37954	11.2978	12.1534	8.86266	8.23339	8.51431	7.55757
Peak_611	Chr1	3383293	3384044	AT1G10310	4.63627	4.18816	5.30078	3.01434	4.0745	4.74775	6.2429	6.86369	6.35438	5.10186	8.67142	6.29317	6.63855	5.33357	7.3577	7.126	5.39696	6.63855	5.06033	7.11944	5.94999	6.65166	5.30297	8.49437	3.45589	4.82207	4.4461
Peak_614	Chr1	3396017	3396934	AT1G10360	4.7541	4.3136	4.82751	4.46043	6.55724	5.02985	4.39239	5.26442	4.06829	4.59115	6.28865	6.57336	5.52227	5.56166	6.05766	6.30119	6.48383	8.12762	4.91704	7.21082	6.86165	4.92599	5.95202	5.7264	4.44073	5.20533	5.08178
Peak_625	Chr1	3484637	3486614	AT1G10560	3.39063	2.45737	2.04601	2.88037	2.4956	2.39089	1.9546	2.56208	2.47815	2.97843	2.62773	2.41499	3.25101	2.64934	3.08148	4.00642	3.66154	4.16931	3.01666	4.13025	3.55517	2.35599	3.19949	2.61859	4.02637	2.34685	3.11721
Peak_638	Chr1	3565165	3565942	AT1G10730	3.1101	3.88974	3.77142	5.74058	6.01314	5.77016	6.45261	6.78855	6.56036	6.01525	7.55339	7.58086	4.83418	6.45472	7.51748	9.14859	7.12238	7.64003	5.17645	6.34696	5.3328	6.06385	7.28507	7.1414	4.82783	6.18428	5.44901
Peak_640	Chr1	3589340	3590657	AT1G10760	1.46295	1.20852	1.71737	1.14367	2.12021	2.0354	5.92413	5.34294	6.07503	8.47336	4.11446	5.85178	7.59411	8.80013	7.74376	5.82685	4.68442	5.96279	2.83734	6.13864	7.16507	2.94834	3.56196	3.43475	1.67996	1.61885	1.84458
Peak_643	Chr1	3606680	3607597	AT1G10830	7.12309	6.26001	5.26084	7.34512	7.07831	7.27886	7.84112	7.28961	8.2261	7.70324	7.64057	8.32459	8.75792	7.86261	8.0363	7.09802	7.10876	7.29498	6.91537	7.74263	6.49995	9.48133	8.48933	6.91358	4.20079	6.75959	5.02268
Peak_648	Chr1	3627591	3628316	AT1G10890	5.16231	4.63023	3.87626	4.84986	6.55704	5.10118	5.57666	5.92987	6.0476	6.231	6.32836	6.13137	4.59401	6.28534	6.46647	6.16987	6.23553	6.61818	6.28534	2.80078	5.06042	7.65969	4.52834	6.21968	3.71098	4.27249	4.15702
Peak_660	Chr1	3702517	3703578	AT1G11090	7.05498	6.57825	7.6447	7.22989	7.59671	8.69102	9.208	10.1073	10.6382	8.36443	9.47268	8.90617	9.65223	10.3302	9.47422	8.36754	9.22967	6.53956	7.93878	7.66637	9.24979	10.6599	9.66926	8.45267	5.99162	6.473	7.02557
Peak_666	Chr1	3744765	3746461	AT1G11175	3.90267	3.70506	3.75446	3.68182	5.08828	4.74151	5.5542	5.46218	5.6036	5.85157	4.66789	6.73304	6.48992	6.47151	6.23709	4.64368	5.44184	4.35502	5.81573	5.45927	5.18709	5.25586	6.24582	4.99723	4.69308	4.00147	4.02471
Peak_668	Chr1	3755981	3757054	AT1G11210	2.10754	1.24891	0.858627	1.32697	1.17085	1.32697	1.58563	1.80449	1.60246	3.96254	1.79531	3.20034	4.43088	7.1292	5.94916	3.57532	4.58088	4.67577	2.86515	4.60536	4.02223	1.6392	1.0928	1.56114	2.02948	1.2183	1.78766
Peak_669	Chr1	3767588	3768416	AT1G11240	6.16867	5.18319	4.55066	6.19643	7.86599	7.00147	8.30619	6.97768	6.58705	7.25924	7.8878	6.21824	6.39075	7.64589	8.94863	7.33261	7.25329	7.19381	5.6789	6.41454	6.84085	6.47601	7.11251	7.7153	5.51631	6.18652	5.89305
Peak_670	Chr1	3777247	3778518	AT1G11260	2.87534	3.42714	3.99187	4.54756	3.91046	2.82235	3.83163	4.87709	3.42714	5.79203	6.61909	5.47154	5.74163	6.17454	5.97036	4.39636	5.478	4.38473	6.80518	7.14376	6.4666	5.65505	5.09807	4.57599	6.65398	4.08621	5.82304
Peak_672	Chr1	3786324	3787015	AT1G11270	1.31123	1.45376	0.484585	1.63666	2.23289	1.06419	1.81719	2.20914	1.33261	2.94314	1.88846	3.01203	3.35884	3.13317	3.37309	2.63909	3.87668	3.62014	2.34691	2.59158	2.30415	2.38729	3.14505	2.65334	2.00248	2.02623	2.66522
Peak_681	Chr1	3822005	3823072	AT1G11360	6.52744	5.06989	5.9749	6.38892	6.47049	7.67563	9.50412	8.85922	10.2044	7.51864	9.90428	8.33283	11.0556	11.6173	10.0797	8.32053	9.18398	8.58526	8.01116	7.03073	7.81107	8.87	10.1398	9.13934	8.66682	6.74754	7.11538
Peak_685	Chr1	3841299	3842638	AT1G11410	1.61435	3.11461	3.64823	2.96986	2.37736	3.11829	2.41662	2.69017	2.16882	2.08418	3.16736	2.8018	4.29225	3.29862	3.81015	4.28735	3.40412	3.35259	2.37736	3.22501	4.40633	2.87786	2.39331	2.25346	2.52824	2.25224	2.86313
Peak_687	Chr1	3849234	3850057	AT1G11440	2.95044	6.17019	5.9727	4.93536	5.33433	5.03909	5.59567	5.55976	6.01459	5.43408	4.97326	5.01315	5.94477	7.20953	5.90487	6.45546	5.90088	6.15822	3.66261	4.34287	5.00717	4.37679	4.47653	4.295	4.03366	3.75638	3.57484
Peak_688	Chr1	3862400	3862946	AT1G11475	1.21706	1.82409	1.87819	3.93668	2.79173	3.6542	3.01712	2.75868	3.46187	2.8308	3.19141	3.67223	3.67824	3.84652	3.9517	3.74736	2.60542	4.11699	2.93297	1.99238	2.75868	3.86155	2.48522	2.89992	3.66922	2.32294	2.74666
Peak_689	Chr1	3866088	3867070	AT1G11480	7.67547	6.0668	7.36277	6.71061	8.17044	7.60691	8.69887	7.81928	8.18717	8.65371	9.07846	9.80754	10.0417	10.5684	9.19551	9.4497	9.98481	8.12363	8.36108	7.07849	7.4932	7.64537	9.72728	9.84936	5.45811	8.52998	4.09358
Peak_698	Chr1	3945643	3946650	AT1G11700	6.11202	4.57423	4.07523	7.15733	5.15641	5.7875	5.03737	5.11727	5.3896	6.94859	4.6998	6.28977	5.93101	5.64726	5.23631	9.67194	9.1289	8.65598	7.57969	7.90094	7.36769	7.19158	7.28127	6.55233	9.04409	6.24738	6.94859
Peak_706	Chr1	3986556	3987342	AT1G11800	4.65775	4.10843	3.83481	6.26185	4.73294	4.34236	6.27647	6.43939	6.35584	5.64569	5.9026	6.08849	4.67028	7.2477	5.74177	5.5162	5.60601	5.57259	4.12722	5.21333	4.41964	5.56841	6.57307	5.54753	3.94133	3.94133	3.83481
Peak_723	Chr1	4076265	4077070	AT1G12060	5.01498	6.36917	7.446	8.36578	6.01023	6.63633	4.27467	5.07617	5.30458	7.50921	5.75326	6.71383	5.72675	7.01363	7.27468	7.06054	8.51466	7.24205	7.15027	7.89671	8.51058	7.53165	7.5235	7.01975	6.72607	5.76754	6.96876
Peak_724	Chr1	4089389	4090767	AT1G12090	3.13381	4.22331	4.56542	4.77879	3.66187	3.89073	6.07809	6.30934	5.42367	6.38204	4.39734	5.01957	5.8969	6.42019	7.19738	5.02196	6.86482	6.26166	4.24715	4.75018	4.76329	2.67488	3.59154	4.07312	2.08007	2.91805	2.90732
Peak_737	Chr1	4185480	4186279	AT1G12300	2.24583	2.26637	4.00263	5.7245	5.08136	5.09163	5.66285	5.23958	5.97311	3.75811	4.76288	5.47792	5.64642	6.03476	6.58748	5.17794	5.45327	4.4485	4.08687	5.34437	4.28618	4.71356	5.23958	5.44916	4.40124	3.52182	3.62661
Peak_738	Chr1	4187004	4188180	AT1G12310	6.98017	7.54998	7.49551	6.41036	8.43681	9.36833	9.16164	8.47592	9.30409	11.6741	13.533	11.6308	9.97725	10.878	10.3264	9.23287	9.51917	10.5876	8.67842	7.89493	10.406	11.5023	11.1113	9.41163	6.76648	7.26507	6.98016
Peak_740	Chr1	4194616	4196302	AT1G12330	6.85188	6.64239	7.04481	7.456	6.95321	7.89349	6.2614	7.20948	7.50861	7.59046	8.10006	6.79341	7.84575	9.50708	7.70251	8.9205	9.24692	9.34241	7.34881	8.10006	8.72464	7.78827	8.23064	7.76196	7.29717	5.87652	6.59951
Peak_764	Chr1	4327192	4328626	AT1G12710	5.81225	4.91877	5.67823	5.61637	7.22694	7.72294	7.25673	6.94973	7.37356	7.7699	10.6944	9.98415	11.0266	13.038	10.5008	7.65994	9.18574	8.85584	7.61068	7.82489	8.72296	9.75162	11.3358	9.21095	4.79047	6.95202	5.65646
Peak_765	Chr1	4334468	4335350	AT1G12730	3.51283	4.47528	4.8569	3.42534	5.54569	5.64994	6.07625	5.35581	5.4917	7.85034	7.66605	6.45601	7.55249	8.66014	6.86928	6.59005	6.66079	5.55686	5.82307	5.85844	6.90465	6.17677	5.7877	6.85253	3.70271	4.70425	4.49575
Peak_774	Chr1	4374124	4375285	AT1G12830	6.8892	6.14653	7.3631	7.87378	8.3024	8.72962	8.99557	9.39874	9.93346	8.75932	7.04198	8.38728	8.87391	10.1145	8.02655	9.84434	8.91211	9.37328	8.00675	9.07478	8.1864	8.71406	9.65196	8.34909	5.98808	7.20042	5.6995
Peak_777	Chr1	4384338	4385973	AT1G12860	6.50281	6.9228	7.47241	6.12	8.95442	7.0715	9.02878	9.12423	9.77531	8.58467	8.11042	9.05189	8.74443	10.4284	10.4455	9.40557	10.2677	9.49801	7.75173	8.22396	10.2827	9.02577	9.42466	7.71355	6.61032	7.00218	5.89292
Peak_779	Chr1	4395269	4396392	AT1G12910	5.87464	6.09547	6.44939	6.42014	8.38712	8.30522	7.66468	8.55384	7.19523	9.44008	9.94755	7.63689	11.8049	9.43277	8.91799	7.73195	7.75681	8.72934	8.02736	8.2789	8.45147	8.12242	7.73049	8.35349	6.09986	5.94484	5.0586
Peak_783	Chr1	4423498	4424621	AT1G12970	5.52219	4.79536	5.04251	4.96793	6.61902	5.74887	8.35349	6.84425	6.5108	7.75973	8.97064	9.84518	8.96187	9.19878	7.79483	6.59271	8.50266	8.06393	6.70677	7.83139	9.32308	8.75859	9.15783	8.46317	4.99717	7.38389	4.77342
Peak_790	Chr1	4461712	4462942	AT1G13090	5.85675	5.76728	7.95856	7.8998	7.6581	7.91048	8.55545	9.08824	8.35915	9.34863	9.45412	8.41523	11.4558	11.0351	9.47415	10.5451	10.2006	9.6838	8.28437	8.57013	8.01597	7.99594	8.71035	7.64342	5.83805	5.85675	7.02382
Peak_791	Chr1	4464004	4465402	AT1G13100	2.34642	1.80124	1.34182	1.05278	2.53324	1.08803	2.09733	2.25478	2.69656	2.43924	3.10663	2.53089	3.16891	2.32527	3.12425	2.4839	2.63664	3.03966	1.77186	2.68129	2.80466	2.39695	3.07138	2.5074	2.23245	2.41927	2.14785
Peak_792	Chr1	4467222	4468887	AT1G13110	5.14547	4.4627	3.60726	3.62305	5.15632	4.87414	4.38771	4.02659	3.92496	6.12918	5.95256	5.65656	5.07838	5.83712	5.24216	6.21502	6.51004	6.31566	7.90321	5.61216	6.55542	7.32996	5.38425	6.79321	4.88104	6.2683	5.73648
Peak_797	Chr1	4491723	4492655	AT1G13170	5.45992	4.70409	3.92888	4.94194	7.73444	7.38912	6.61568	7.66925	7.00856	7.53359	6.79186	6.38664	7.7133	9.75702	9.15976	5.8669	6.93105	6.79538	6.62448	6.46944	5.26259	7.08256	8.18723	6.66325	5.20269	5.01065	5.35773
Peak_798	Chr1	4494946	4495774	AT1G13180	3.33715	2.9029	4.11641	4.86792	4.90559	4.38013	5.56588	6.48593	6.15082	3.99347	6.11909	4.83024	5.83555	7.84418	5.45285	5.03051	5.80977	5.04042	5.69675	5.81968	4.15408	5.66304	4.11443	4.14616	4.74696	4.55066	3.69406
Peak_802	Chr1	4515507	4516209	AT1G13220	3.0935	3.69677	3.80901	5.73339	4.24158	4.04751	6.72714	7.76766	6.91186	5.24001	4.41461	5.47851	4.97813	5.06231	5.18623	5.27509	5.81522	5.12778	5.14181	4.78405	4.67416	3.97035	4.42631	5.14415	3.84408	2.9953	3.77393
Peak_810	Chr1	4576874	4577909	AT1G13360	4.66481	5.05195	6.14517	7.12732	6.25306	6.28796	5.82149	6.34509	5.2598	9.72151	6.32128	7.39704	7.72073	7.28756	7.48114	7.56206	8.57753	8.42045	6.01347	7.44465	8.65686	6.14358	5.09321	4.28877	7.23838	6.16738	7.4018
Peak_833	Chr1	4746235	4746975	AT1G13860	3.78892	2.75074	2.63317	3.74456	3.40293	5.20644	5.31736	5.41053	4.79161	4.37678	4.78052	4.55203	4.70731	4.92693	4.47882	3.49832	4.61193	4.66073	4.15273	4.186	4.76942	3.54047	4.2215	3.90428	2.84391	3.95973	2.73077
Peak_836	Chr1	4758946	4759863	AT1G13920	0.821894	0.456608	0.182643	0.182643	0.547929	0.182643	1.52561	1.18002	0.913215	2.7862	0.365286	1.09586	2.06996	3.05838	2.33139	2.00908	1.59723	1.59544	1.18718	2.13979	2.66802	0.821894	0.456608	0.821894	1.09586	0.54793	0.547929
Peak_837	Chr1	4760953	4762403	AT1G13930	3.19582	3.4779	4.10211	5.19986	3.23546	3.10179	7.68423	7.98444	8.47837	9.35407	5.11489	6.66918	7.68536	8.98249	8.06034	7.04869	6.92181	6.33725	5.00387	10.6988	11.3332	3.50849	3.91292	3.80983	3.75545	3.40879	3.34988
Peak_842	Chr1	4794629	4795493	AT1G13980	4.70523	3.19826	2.03526	2.51984	4.71092	3.19826	6.75569	5.82262	5.40645	6.35471	6.44403	7.80657	6.2806	7.93009	5.91193	6.41743	4.80975	6.2673	5.59648	5.1499	6.90011	7.08825	6.86591	7.46641	4.94277	4.5646	4.71092
Peak_844	Chr1	4801101	4801949	AT1G14010	4.83843	5.33215	6.23439	6.30022	7.57614	6.17243	7.78718	7.46578	6.22084	7.5045	8.3506	6.47447	6.19761	8.66425	7.17148	6.76103	8.21314	7.69425	7.1134	6.15888	6.54805	6.00399	7.54517	5.8917	5.08045	4.4725	6.00592
Peak_846	Chr1	4806524	4807609	AT1G14030	6.36174	8.79563	10.45	11.0888	7.70582	9.28907	11.4399	11.6564	10.4424	11.4702	9.92327	11.2658	13.5741	12.8218	12.4601	10.1836	10.9616	9.58877	7.76183	12.5131	11.4248	7.35921	10.4213	7.82238	7.87383	6.71592	7.33347
Peak_849	Chr1	4826780	4827553		3.89922	3.35766	2.986	4.11584	4.10097	3.89072	5.5239	4.4875	4.54909	5.39859	4.31123	5.48142	5.25205	6.60701	5.15648	4.6574	5.19259	6.90221	4.41954	3.35766	3.81639	4.85066	5.42196	3.99479	4.44078	4.30486	4.22415
Peak_866	Chr1	4912349	4913265	AT1G14360	4.41869	4.53342	4.64097	5.17157	5.44045	4.7539	7.23482	7.13085	4.71088	6.03021	7.49833	7.37105	7.77976	8.13648	8.15082	7.19897	6.58412	6.98207	6.27938	6.28655	5.20204	5.3813	6.31882	5.30422	4.02253	3.0169	3.0169
Peak_874	Chr1	4954026	4954720	AT1G14470	3.45314	2.48815	2.04587	2.60641	3.74169	3.37745	3.01558	3.72986	2.53309	3.62106	4.44651	4.05152	4.04443	5.30506	4.1887	4.19817	4.77527	4.04916	2.99903	4.4536	3.85994	3.15986	4.65701	4.18398	2.85002	2.48106	2.50707
Peak_877	Chr1	4969275	4970175	AT1G14520	1.16215	1.48871	1.56716	1.41939	1.31175	1.32269	3.21095	2.89533	2.54687	2.22212	3.50286	3.78564	3.90058	4.1268	4.74527	3.56489	3.60867	3.16352	3.65246	2.97743	2.74573	1.90103	1.84265	2.13638	2.20206	1.95394	2.29145
Peak_886	Chr1	5023346	5024103	AT1G14640	1.32718	1.92787	1.88016	2.01028	2.0775	1.65029	3.82539	4.06176	3.38082	3.49142	3.62804	2.57411	3.92948	2.88856	3.10975	2.88639	2.98614	3.30059	2.7541	4.09212	2.87554	2.58712	2.54375	1.43777	3.0165	1.45078	1.82812
Peak_895	Chr1	5063850	5065196	AT1G14710	4.83496	5.15835	7.03278	5.80024	5.52811	6.88145	7.64783	7.06329	6.47508	6.59712	7.06084	7.64416	8.59725	8.83765	9.29649	6.35061	7.3403	7.57827	7.17677	6.9083	6.58613	5.55618	7.95169	6.47509	5.02045	5.16567	5.85027
Peak_898	Chr1	5081668	5082523	AT1G14750	1.56698	1.11186	1.17715	2.87279	1.77437	1.48248	2.18916	2.70572	1.8243	3.02641	1.31925	2.35046	3.72157	2.42536	2.93808	3.61979	4.19589	3.65244	3.59291	2.96496	3.06674	0.783488	0.881424	0.881424	3.03601	1.0773	1.95872
Peak_899	Chr1	5088265	5088907	AT1G14770	2.3647	2.82998	2.43628	3.25946	3.38983	4.5888	4.65527	3.66082	3.90623	3.65059	4.53	4.26158	3.49209	3.37194	3.26457	3.66337	2.5232	3.11885	3.36683	3.17509	2.59223	2.47719	2.92712	2.86832	2.60756	2.08605	2.34681
Peak_900	Chr1	5097247	5098089	AT1G14790	2.35356	1.69059	1.65939	2.7845	2.30286	1.59114	1.52094	2.5856	1.91873	3.18228	2.98339	3.39872	3.62102	4.87287	3.58006	3.17838	3.58202	3.48062	3.38117	4.05975	3.95445	2.49006	3.67951	2.6324	2.02207	2.48616	2.03962
Peak_908	Chr1	5149146	5151160	AT1G14920	10.7927	11.0627	12.5646	11.6322	12.0237	12.9937	11.6697	12.0547	12.6298	12.7367	14.6285	13.2719	13.9449	15.109	15.5503	13.6047	15.2346	13.143	11.3809	10.9338	11.2463	14.0224	15.5609	12.9945	10.229	11.4307	10.2763
Peak_909	Chr1	5164358	5165140	AT1G14970	3.96987	3.75573	3.59408	3.43663	3.99296	4.01395	2.78373	5.4604	4.24908	6.01882	5.72911	5.87607	5.52128	7.19866	6.71581	5.71232	6.23086	5.89707	5.42681	5.97894	7.41489	6.09231	3.91528	4.42542	4.94606	4.1756	2.67667
Peak_919	Chr1	5199156	5200117	AT1G15110	3.40548	4.28889	3.98986	4.17099	4.74511	3.69083	4.33331	4.86302	4.18465	5.00484	5.69516	5.14154	4.50931	5.2321	4.86131	6.41795	5.82845	5.11762	5.77376	4.50589	3.59514	4.11118	4.77929	4.16928	4.87498	3.99157	4.52469
Peak_922	Chr1	5211116	5212365	AT1G15140	10.1547	9.45639	10.1192	9.02769	9.91664	10.4374	10.3703	11.6038	10.7938	13.2726	14.1116	13.049	13.0201	14.9111	14.8072	12.8926	12.694	12.3284	11.2961	12.4454	10.4729	12.072	12.9097	11.763	10.2125	11.6025	10.5676
Peak_926	Chr1	5227264	5228002	AT1G15190	1.3613	0.907532	0.680649	1.88179	1.72609	1.64379	2.94948	1.9285	2.60915	4.31077	1.45694	2.04194	3.58119	2.84048	2.88497	3.42104	3.35208	2.96727	3.24754	3.83254	3.25866	2.20877	0.79409	2.16873	2.49571	0.858596	2.15539
Peak_930	Chr1	5242394	5244413	AT1G15230	7.18222	6.64595	6.87136	7.32463	7.9268	8.82844	8.7487	8.04561	8.4826	9.10186	10.6496	9.77403	7.57201	9.54618	8.55665	8.13431	8.62338	8.13431	8.04154	8.04073	7.38728	9.50061	8.84798	9.75532	5.92577	7.30184	6.44821
Peak_932	Chr1	5249647	5250817	AT1G15260	3.53043	3.37461	2.84119	4.0091	4.02595	4.0091	3.44059	3.43497	2.91839	4.43865	5.09279	4.39794	4.70817	4.42742	4.51024	4.70817	5.91259	5.36653	5.22615	4.77555	4.93979	4.58183	5.017	4.68852	4.80783	3.90803	4.69413
Peak_947	Chr1	5318066	5318635	AT1G15480	2.1946	1.61783	1.02953	2.05906	2.1946	2.02157	2.22921	2.05906	2.85212	2.43396	2.50606	2.64736	2.56662	3.4981	3.12896	2.54066	2.35898	3.31353	2.75407	2.5695	2.58392	2.21767	2.23498	2.43973	2.06771	1.61783	1.60053
Peak_951	Chr1	5332197	5332965	AT1G15520	3.92457	2.44965	1.57752	3.88823	4.12978	3.95236	3.70654	3.16146	3.96305	4.78387	4.12336	4.56156	4.96771	4.41621	4.444	3.89678	4.42476	3.69799	4.12123	3.96946	4.46965	3.99297	4.23024	3.59966	2.94343	2.61638	2.83441
Peak_955	Chr1	5381028	5381733	AT1G15660	2.08151	2.475	3.04776	4.75907	3.95813	4.04893	3.53205	3.96977	4.47967	3.22471	4.86384	4.21424	4.3912	5.17816	4.98724	5.79051	3.75324	5.14324	3.87431	3.36674	5.22939	5.1642	4.15604	3.88595	2.6892	2.66592	2.69618
Peak_957	Chr1	5398817	5401771	AT1G15690	9.65469	11.0059	13.1275	13.1765	13.5514	12.46	11.0075	11.5377	10.9519	14.6105	14.635	14.9081	12.7737	13.721	14.3763	16.7249	18.1935	16.3088	12.9183	11.6951	12.1835	13.79	13.4585	12.3971	11.0837	11.5466	11.1188
Peak_960	Chr1	5405908	5406737	AT1G15720	4.08967	4.64618	4.24216	4.34713	4.0758	3.70545	5.43837	4.04016	5.13733	3.85795	4.84818	4.23424	4.70757	4.05006	6.28996	4.61251	6.0127	5.11555	4.03421	3.86191	3.68763	3.53514	4.04016	3.73516	3.64604	3.49949	3.86191
Peak_961	Chr1	5409208	5410127	AT1G15730	7.61503	10.2201	11.5494	9.08908	8.59951	9.49466	10.5703	12.3356	10.4577	9.50359	9.48215	9.64653	12.2444	12.3624	9.95742	8.10995	10.0986	9.20343	8.26361	7.37918	10.3898	8.45301	7.95451	8.47445	9.02118	8.76568	8.66919
Peak_966	Chr1	5442693	5443746	AT1G15800	5.48813	3.81471	3.49968	4.51964	5.79693	4.45258	5.34933	4.61321	4.62101	6.30379	5.72674	7.03211	8.08794	8.16123	6.70616	6.51745	6.87615	7.56704	7.60291	6.81688	7.01339	4.46661	5.09044	3.91609	6.47846	3.57922	7.55612
Peak_968	Chr1	5445967	5450190	AT1G15810	4.96172	7.815	10.0406	10.2764	6.66855	7.75468	10.434	10.6301	10.9189	14.1092	5.69605	9.98142	8.89063	9.96313	9.32803	9.69812	10.3624	9.24865	6.73315	10.8932	12.4852	4.1083	3.94797	4.4243	5.35865	4.59708	5.10532
Peak_971	Chr1	5461237	5462001	AT1G15885	2.50973	2.85998	1.7061	1.5342	1.90164	2.41733	2.19172	1.87156	2.51833	2.81055	3.16295	2.39155	2.55056	2.91799	3.02113	3.30477	3.40576	3.30047	2.06924	2.73965	2.95237	2.63866	3.5884	2.52692	2.17882	2.70312	1.86296
Peak_973	Chr1	5469340	5470515	AT1G15920	4.47429	4.44214	3.76702	4.57773	5.31435	6.74149	6.25926	5.84551	5.39123	6.59053	6.23829	7.20834	5.55198	6.26484	6.6087	5.81616	5.53381	5.88465	4.56235	4.41419	6.65762	4.49666	5.15361	5.20813	5.0991	5.49188	5.10049
Peak_985	Chr1	5518286	5519358	AT1G16110	1.98082	2.05895	1.5626	3.38716	2.71003	2.517	4.21901	3.0057	3.84827	4.57595	2.8908	3.2983	4.58514	5.14584	4.50854	4.88541	4.77051	5.38176	3.87738	3.12059	3.27838	2.93063	2.34389	2.27649	2.12789	2.4067	2.37453
Peak_990	Chr1	5546665	5547682	AT1G16210	8.14467	7.99934	7.46487	8.89228	9.67542	8.36103	9.40577	11.9312	8.0397	7.25011	12.125	10.8671	12.6175	12.0491	13.2924	9.02792	10.1405	9.47036	8.36103	8.01225	9.82074	9.77554	12.1492	10.5587	6.97722	8.8939	7.7765
Peak_997	Chr1	5590092	5591746	AT1G16340	4.18645	5.53525	5.33362	5.88188	5.04161	5.72396	6.42319	6.57615	6.14707	5.37037	5.62265	5.60477	5.1171	5.62761	6.56522	5.16676	4.29968	4.53308	4.94626	5.0585	5.00586	4.7804	5.83024	4.89859	3.17534	3.33029	3.24387
Peak_1002	Chr1	5638991	5640099	AT1G16500	3.77523	3.93531	3.44914	4.12948	5.88147	5.35232	4.51041	5.1122	4.20211	5.2367	6.33355	8.47536	7.61568	6.62258	6.91755	5.44273	6.46399	6.48622	5.59095	5.62653	5.0366	6.16903	6.02673	5.82367	4.49855	4.59935	6.06971
Peak_1003	Chr1	5644656	5645348	AT1G16510	2.55938	1.93554	1.08874	2.27711	2.33878	2.73016	1.24529	1.3212	0.725828	1.81457	2.87485	2.41943	1.40185	1.68648	1.53942	3.39906	2.29846	3.60542	4.67044	3.29469	1.90945	4.14387	3.26623	4.35497	4.82937	2.81081	4.234
Peak_1004	Chr1	5648693	5649390	AT1G16520	4.20367	2.91078	2.46804	2.74828	3.30642	3.21693	2.03943	2.00646	2.10066	1.50484	2.74593	2.32203	1.32115	3.14157	2.17837	4.51453	4.72413	4.96434	4.1024	3.77977	2.8731	2.70825	3.00027	3.53014	3.56076	2.23254	3.08034
Peak_1008	Chr1	5673057	5674293	AT1G16570	3.65966	2.95005	2.88228	3.34206	3.61314	3.59188	3.16399	3.98788	3.78324	3.45634	4.47291	3.86297	4.36528	3.754	4.67888	3.68756	3.72743	4.03971	3.61979	4.03173	3.88024	3.44172	3.34738	3.34738	2.57531	2.09693	2.98194
Peak_1021	Chr1	5738072	5738850	AT1G16770	2.64821	2.44564	3.45428	3.19684	2.53848	2.39499	3.57033	2.56802	3.75813	4.55787	2.25994	4.27511	2.92253	3.22005	3.77923	5.43569	4.36585	4.75201	4.4397	5.40403	3.39519	3.55556	3.75181	4.87861	4.51989	2.38444	3.62309
Peak_1027	Chr1	5763082	5764171	AT1G16840	9.22935	10.6228	9.16148	7.67453	8.60199	9.18561	8.61406	10.2563	7.92185	9.53699	10.9983	11.7101	13.0372	11.968	13.1759	9.6139	11.2547	9.34245	11.4733	8.5477	9.27458	11.7433	10.6017	10.2051	8.70303	9.30023	8.38332
Peak_1029	Chr1	5772484	5773361	AT1G16870	4.86958	5.43124	6.3636	5.45184	7.49814	5.61284	9.3198	8.73942	8.2751	7.22855	7.26225	7.19298	10.2035	8.26013	8.36684	5.85062	7.266	4.84899	6.35423	7.43262	7.06567	7.12371	5.41439	6.87471	6.91589	6.8279	5.44247
Peak_1044	Chr1	5851813	5852749	AT1G17120	8.96453	8.1593	7.11548	7.38389	8.29087	9.04697	10.1101	8.78559	8.82067	10.2522	12.9784	10.7978	10.768	11.6363	10.768	7.31898	10.3346	9.93641	9.43643	9.23644	8.20315	9.04873	10.1487	8.67857	7.05408	9.42065	9.30486
Peak_1049	Chr1	5867561	5868559	AT1G17160	8.26337	5.94495	5.11895	6.94538	6.71337	6.66894	9.03673	9.46783	8.07085	9.41352	11.0096	10.7891	8.88699	10.8533	10.4863	9.43821	9.43657	9.79527	6.25265	8.47727	9.23746	9.89564	8.25185	9.56326	7.46369	9.06141	8.22388
Peak_1053	Chr1	5897935	5898754	AT1G17240	0.613414	2.09282	1.68388	2.09282	0.92012	1.30501	2.65412	2.14695	2.55589	3.34972	1.75003	3.90099	3.57825	3.06707	3.32967	3.01495	2.96283	2.93476	3.8208	3.66043	2.45566	3.15327	2.71225	3.41587	4.28387	2.07077	2.71826
Peak_1068	Chr1	5996079	5997840	AT1G17450	4.71213	3.86132	3.24093	4.65989	5.13567	5.24109	5.21404	6.4828	4.53208	5.46406	8.06314	6.09004	6.72256	7.8691	6.28781	7.39145	5.95384	6.53691	6.39417	6.2449	5.93238	5.78405	7.46982	5.75699	5.23363	5.42021	6.04246
Peak_1069	Chr1	5998828	5999287	AT1G17460	1.09348	0.846909	0.546738	1.11849	0.728984	1.00057	1.39365	0.911231	1.12206	3.35547	1.36506	2.72654	3.42694	2.84447	3.66636	2.84447	3.30187	2.81588	2.88735	2.22983	4.53114	2.21554	1.00057	0.728985	1.61163	0.546738	2.00471
Peak_1071	Chr1	6007706	6008228	AT1G17480	1.10634	1.54321	1.38292	1.5275	1.28863	2.05238	1.33263	1.49921	1.83551	3.121	2.08695	2.13724	4.32791	3.04556	1.72551	3.17757	2.69984	2.82556	1.90466	2.30696	2.40439	1.99895	1.09691	1.67836	1.17862	1.93609	1.86694
Peak_1074	Chr1	6023732	6024346	AT1G17510	3.22076	2.5178	2.38149	3.13523	3.32767	2.57393	3.48804	3.99855	4.20435	3.81412	4.11882	4.04131	4.19634	4.55449	4.04399	4.51708	5.23072	3.46398	2.8626	3.32767	4.5732	3.81412	4.36205	4.918	3.90767	2.14628	3.18066
Peak_1078	Chr1	6052069	6052521	AT1G17590	1.43695	1.99214	1.85062	1.40067	0.89991	2.97914	3.33112	2.40218	2.40581	2.79045	2.08286	2.48564	2.92834	2.83036	2.57636	2.47476	3.27669	2.0502	2.73965	4.1766	3.17146	2.26066	2.07923	2.45661	2.0248	1.4805	1.29544
Peak_1083	Chr1	6071320	6072116	AT1G17650	3.68151	3.13083	4.12907	3.60932	4.86124	4.01356	6.77109	5.2593	7.06602	7.30114	5.41398	5.8966	6.06366	7.46614	6.86183	4.69006	5.63673	5.89454	5.27992	3.98263	4.60962	4.57662	4.23631	4.57043	4.41781	5.57486	5.34386
Peak_1084	Chr1	6073390	6074634	AT1G17665	6.96465	4.30158	2.42409	3.3668	7.26831	6.39295	1.54873	1.6834	1.81807	7.04386	12.5258	9.47588	10.1756	13.1133	10.6206	11.1144	11.529	11.8973	11.9871	8.31532	6.38107	12.708	13.5147	11.084	6.32957	7.51918	7.00425
Peak_1086	Chr1	6087635	6088447	AT1G17690	5.67138	7.05636	6.33455	7.86309	7.05838	6.53471	7.42435	7.05839	8.06528	7.09477	9.07217	7.92374	7.81861	7.39401	6.61559	6.60144	6.44373	7.01997	6.71062	7.37784	7.23226	6.60751	7.72763	6.85822	4.92328	6.30018	5.33574
Peak_1091	Chr1	6115850	6116695	AT1G17760	3.14962	2.99613	3.04859	4.76038	3.8083	4.26491	4.37372	5.24613	4.26102	5.00131	6.17878	5.17035	3.546	6.39445	4.52722	4.2552	4.70209	4.31543	3.9074	5.11984	3.8938	4.83422	4.31737	5.00714	2.63472	2.57644	4.06284
Peak_1092	Chr1	6123590	6124591	AT1G17780	4.34571	3.22032	4.51796	4.11275	4.50483	4.29813	4.59014	4.48843	4.11603	6.25033	3.59435	4.60654	4.92809	5.27915	5.49898	5.97637	4.69513	5.08393	5.22665	5.32837	4.86902	4.3375	6.03215	4.35063	2.87745	3.76497	3.1793
Peak_1093	Chr1	6126544	6127575	AT1G17790	7.7634	7.62004	8.37663	7.48466	7.63597	8.02939	8.93571	9.52824	8.89589	10.9665	9.9137	9.51868	9.25268	9.63814	9.14437	9.34666	10.4393	10.7913	7.9402	9.404	8.68563	9.84999	10.6894	9.91689	6.99565	7.57385	7.58181
Peak_1096	Chr1	6148110	6148932	AT1G17850	5.33283	5.40273	4.99528	5.5006	6.67102	5.38475	6.72296	8.2509	6.75491	6.20165	6.97262	7.8794	7.36809	8.26088	7.49991	5.25493	5.00726	4.78756	5.72829	5.78821	6.3175	6.66503	4.72564	5.81018	3.87678	5.09315	4.65174
Peak_1099	Chr1	6155101	6155842	AT1G17890	4.40411	3.42936	3.48253	5.38108	4.82724	4.78737	6.23178	5.89061	5.31019	7.13342	8.0262	7.47458	8.59334	6.80112	7.62744	7.76701	4.8206	6.34919	5.31462	5.51178	5.12188	5.73111	6.71472	6.96727	4.85826	4.17593	5.08422
Peak_1102	Chr1	6172294	6173228	AT1G17940	1.74751	1.85124	1.51193	3.14693	2.98167	2.93245	3.85543	2.7373	3.49678	2.95882	3.40712	3.58293	5.76996	6.41165	5.70139	4.66238	3.35438	4.0664	3.13638	3.58469	3.46338	2.15187	2.4525	2.30834	2.34174	1.17439	2.0288
Peak_1103	Chr1	6184803	6185832	AT1G17970	4.842	6.42354	5.59846	6.72038	4.96328	5.37822	9.0951	8.34023	8.36576	9.07913	7.49918	8.1168	9.08393	7.40343	10.0239	7.47685	8.54611	7.96519	6.70761	6.98849	7.20873	6.51132	6.57356	5.67825	4.61856	6.18575	5.07819
Peak_1106	Chr1	6208943	6209597	AT1G18040	2.04783	1.71406	2.73798	3.82463	2.17582	3.25746	2.81577	4.29142	3.41055	3.91498	3.2675	2.48701	4.22617	2.76809	4.29142	4.21111	3.64645	4.1308	3.19974	3.17966	4.01285	3.58371	2.88102	4.0254	2.68778	2.4318	3.7117
Peak_1109	Chr1	6220174	6221259	AT1G18075	4.91472	4.32289	3.55246	4.95104	6.67354	6.02268	3.93692	4.55448	4.24569	5.34458	5.19473	5.78958	5.53227	7.41218	5.8804	6.88696	7.17909	7.02167	5.06305	5.48837	5.62006	6.85215	7.05195	7.10189	5.32642	4.08677	4.24418
Peak_1112	Chr1	6239064	6240118	AT1G18140	2.10498	2.08629	1.74818	2.48049	2.2904	2.18133	3.07568	2.70173	2.51944	5.00304	2.94012	3.65217	3.25797	3.14735	3.01958	4.64	5.48137	4.64624	2.94012	3.4169	5.08561	2.7812	3.01959	2.54281	2.7812	1.98657	2.88091
Peak_1113	Chr1	6246809	6247833	AT1G18150	4.66676	5.26012	6.77401	6.87024	7.0322	6.53506	8.23979	7.49568	8.60222	8.34242	7.63359	7.21342	8.13876	9.52114	8.76901	5.80699	6.56553	5.97056	7.4636	8.50921	7.15729	5.90962	6.43724	6.15018	4.253	5.78934	4.91853
Peak_1114	Chr1	6248675	6249709	AT1G18160	4.44697	4.45491	5.2093	6.6101	6.39727	7.25808	7.55666	7.32638	8.29835	7.28984	9.76426	8.58581	6.50845	9.10833	7.37878	7.30414	8.06965	7.82031	6.05263	8.50799	6.54974	6.6371	6.71015	6.44651	4.66137	6.02564	4.99489
Peak_1115	Chr1	6254097	6254957	AT1G18170	6.58661	6.06732	5.70649	6.91117	6.03486	6.74316	9.00361	10.1758	9.46562	7.97838	8.67332	9.15634	10.6436	8.8146	9.67372	8.24567	8.43277	8.8967	7.70919	7.84474	10.4717	8.10249	9.55918	7.82757	6.91307	7.94403	6.03677
Peak_1118	Chr1	6281115	6282304	AT1G18260	8.94	8.31564	8.20513	9.25633	7.93024	8.67478	11.2192	12.2566	9.93456	10.9858	10.1473	11.4015	10.3711	11.0673	11.8947	10.3117	9.52293	9.13339	8.84606	10.1238	9.69697	9.50911	11.5438	9.90832	8.38332	8.73004	6.85694
Peak_1119	Chr1	6282318	6283127	AT1G18265	1.17298	0.935539	0.941627	1.73105	1.5687	1.47738	2.73965	2.34595	1.72902	3.94306	1.7757	1.30894	3.43369	3.0684	3.23075	3.40122	3.07246	2.58136	2.86953	3.28352	4.04453	1.69655	1.55247	1.43679	1.44897	0.819865	1.65596
Peak_1123	Chr1	6307190	6308055	AT1G18330	0.677636	2.83582	4.71498	5.55965	3.09776	3.19457	8.88519	8.31575	9.05792	8.4657	0.95856	4.50238	4.54984	4.40938	3.92915	3.40526	2.42013	3.27809	1.8393	6.71182	9.63305	1.16546	0.580831	0.968051	1.8393	0.19361	1.06486
Peak_1128	Chr1	6327354	6328108	AT1G18390	2.52773	1.74612	1.30197	1.7766	1.60242	1.66121	2.46242	1.88764	2.79988	3.54231	2.36009	2.46459	3.49441	3.86671	4.20635	2.78464	3.22008	3.77527	3.37466	4.20853	2.93922	2.75416	2.92834	2.22075	3.17872	2.22075	2.8173
Peak_1130	Chr1	6344864	6346711	AT1G18415	6.94608	6.36435	5.93561	7.21826	9.70795	7.71193	7.87827	7.45843	7.42462	7.88983	9.93122	8.73663	8.65035	9.63057	9.87251	8.53116	8.54183	7.98412	7.65144	7.35079	7.48333	7.81511	10.046	8.31679	6.03434	7.84802	7.66745
Peak_1133	Chr1	6359246	6360269	AT1G18470	3.43847	4.3326	4.58463	4.85592	6.55428	7.24776	9.13394	8.3586	8.17078	5.38565	8.91241	6.70036	7.72934	8.80325	7.92518	5.96676	6.04702	6.68431	7.53189	6.73889	6.00207	5.50926	6.50613	7.88826	3.60221	4.514	4.6665
Peak_1135	Chr1	6362782	6364022	AT1G18480	4.02934	3.01604	2.38952	3.83198	5.23734	4.46776	4.42671	4.45452	3.95383	5.14594	4.89825	5.40423	5.66518	6.80298	5.14197	4.67573	4.4479	5.13403	3.43725	3.86641	3.59885	4.20683	3.83727	3.9247	3.19883	3.51275	3.52865
[truncated: 2,871 more rows]

## Sheet: Diurnal_H3K9ac_morning_phase
Peak_ID	Chromosome	Start	Stop	Genes	ZT0	ZT0	ZT0	ZT3	ZT3	ZT3	ZT6	ZT6	ZT6	ZT9	ZT9	ZT9	ZT12	ZT12	ZT12	ZT15	ZT15	ZT15	ZT18	ZT18	ZT18	ZT21	ZT21	ZT21	ZT24	ZT24	ZT24
[truncated: 1,493 more rows]

[truncated: 1 more sheets: Diurnal_H3K9ac_evening_phase]
