# Supplementary material for: Diurnal regulation of SDG2 and JMJ14 by circadian clock oscillators orchestrates histone modification rhythms in Arabidopsis
Source: Genome Biol. 2019 Aug 20;20:170. doi: 10.1186/s13059-019-1777-1 (PMC6892391; doi:10.1186/s13059-019-1777-1)
Supplement: Supplementary file 5 — Table S4. Primers used in this study. (DOCX 14 kb) [file 13059_2019_1777_MOESM5_ESM.docx]

| SALK-021008 | TCAGACGATGCTTATGGTTCC | Genotyping |
| --- | --- | --- |
| TTATGAACCAAAGCAAAACCG |
| SALK_135712 | GACAGGTGTACTATGGAGCTGACT |
| AGCAGATGGTTAGTACATAGCTCC |
| CCA1 | TCCAGATAAGAAGTCACGCTCAGA | ChIP-qPCR |
| CATTAAGCCAATGAAGATGAGAACA |
| SDG2 | TCCAGATCTGCATAAATCTCCT |
| TCAAAGCGTATATCTTGAGCGC |
| JMJ14 | TGGAGTCCGATCTAAGAAAAG |
| TATTTGGTATAAATGGATTGAAG |
| LHY | AATCTAAAGAGGTTATCACAACGGC |
| GCTGCTTCAAATCCTCTCTAACAAG |
| At2g26560 | GCTGCTACTCTTGCGTTCG |
| GCCTTAGCTGCCATCAAGG |
| JMJ14 | GGGCTTGAAATGTTTGGATTTCTC | RT-qPCR |
| CTTCAACAGTCCACGCAGAAGC |
| SDG2 | TTTAGCAGGTTGCCCTTTTG |
| AAAGCTGAGGACCTTTGCAG |
| CCA1 | AGGCTCGATCTTCACTGGACTCA |
| CCGCCTCAACATCATCACTACTCG |
| LHY | TGTGAACGGGAATATAGCAAAAT |
| TCTGGAGAAACGAACGGTAATCAT |

Table S4 Primers used in this study.
